# Supplementary material for: A carboxylate-bridged NiII8 cluster with a distorted cubane topology: structure, magnetism and density functional studies
Source: Royal Society of Chemistry journal article supplement (doi:10.1039/c6dt01833e), 2016-01-01
Supplement: c6dt01833e1.pdf [file c6dt01833e1.pdf]

**Electronic Supplementary Information (ESI): S1-S4, followed by**

**CIF of 1**

**Carboxylate-bridged Ni<sup>II</sup><sub>8</sub> cluster with distorted cubane topology:  
structure, magnetism and density functional study**

**Himanshu Arora, Joan Cano, Francesc Lloret and Rabindranath Mukherjee\***

**Dalton Trans**



**Fig. S1** The curve of TGA of  $[\text{Ni}^{\text{II}}_8(\text{L}^4)_6(\text{H}_2\text{O})_6(\text{CH}_3\text{OH})_2(\text{DMF})_2][\text{ClO}_4]_4 \cdot 2\text{CH}_3\text{OH} \cdot 2\text{CH}_3\text{CO}_2 \cdot \text{C}_2\text{H}_5$  (1).



**Fig. S2** UV-VIS spectra (in DMF) of  $[\text{Ni}^{\text{II}}_8(\text{L}^4)_6(\text{H}_2\text{O})_6(\text{CH}_3\text{OH})_2(\text{DMF})_2][\text{ClO}_4]_4 \cdot 2\text{CH}_3\text{OH} \cdot 2\text{CH}_3\text{CO}_2\text{C}_2\text{H}_5$  (**1**).



**Fig. S3** Packing diagram of  $[\text{Ni}^{\text{II}}_8(\text{L}^4)_6(\text{H}_2\text{O})_6(\text{CH}_3\text{OH})_2(\text{DMF})_2][\text{ClO}_4]_4 \cdot 2\text{CH}_3\text{OH} \cdot 2\text{CH}_3\text{CO}_2\text{C}_2\text{H}_5$  (1).

**Table S1.** Calculated spin configurations, their relative energies ( $E_i$ , in  $\text{cm}^{-1}$ ) as a function of different  $J_i$  constants and their found  $S^2$  parameter. The spin configuration used as a reference is that with the maximum multiplicity generated from the parallel alignment of all local spin moments of the  $\text{Ni}^{\text{II}}$  ions that shows a calculated energy equal to  $-18737.9021753$  a.u. Only the centres with an antiparallel (negative) alignment of their spin moment are noted.

| Spin conf. | $S$ | $J_1$ | $J_2$ | $J_3$ | $J_4$ | $J_5$ | $J_6$ | $S^2$  | $E_i$  |
|------------|-----|-------|-------|-------|-------|-------|-------|--------|--------|
| {1}        | 6   | 3     | 0     | 3     | 3     | 0     | 0     | 44.021 | -62.35 |
| {2}        | 6   | 0     | 0     | 0     | 3     | 3     | 3     | 44.020 | -95.38 |
| {3A}       | 6   | 0     | 3     | 3     | 0     | 3     | 3     | 44.025 | -17.29 |
| {4}        | 6   | 3     | 3     | 0     | 0     | 0     | 0     | 44.019 | +7.81  |
| {1,4}      | 4   | 0     | 3     | 3     | 3     | 0     | 0     | 24.021 | -58.62 |
| {2,3A}     | 4   | 0     | 3     | 3     | 3     | 6     | 0     | 24.021 | -49.97 |
| {1,3A,4A}  | 2   | 6     | 6     | 6     | 3     | 3     | 3     | 12.019 | -71.77 |
| {1,3A,4}   | 2   | 0     | 0     | 6     | 3     | 3     | 3     | 12.020 | -87.68 |
| {1,2,4}    | 2   | 0     | 3     | 3     | 0     | 3     | 3     | 12.025 | -17.05 |
| {1,2,3A,4} | 0   | 0     | 0     | 6     | 0     | 6     | 0     | 8.027  | +16.57 |

## X-ray crystallographic data (cif file)

data\_17sepam

```
_audit_creation_method      'SHELXL-2016/4'  
_shelx_SHELXL_version_number '2016/4'  
_chemical_name_systematic   ?  
_chemical_name_common       ?  
_chemical_melting_point     ?  
_chemical_formula_moiety    'C96 H154 Cl4 N14 Ni8 O56'  
_chemical_formula_sum  
'C96 H154 Cl4 N14 Ni8 O56'  
_chemical_formula_weight    3011.80
```

loop\_

```
_atom_type_symbol  
_atom_type_description  
_atom_type_scatter_dispersion_real  
_atom_type_scatter_dispersion_imag  
_atom_type_scatter_source  
'C' 'C' 0.0030 0.0020  
'International Tables Vol C Tables 4.2.6.8 and 6.1.1.4'  
'H' 'H' 0.0000 0.0000  
'International Tables Vol C Tables 4.2.6.8 and 6.1.1.4'  
'Cl' 'Cl' 0.1480 0.1590  
'International Tables Vol C Tables 4.2.6.8 and 6.1.1.4'  
'N' 'N' 0.0060 0.0030  
'International Tables Vol C Tables 4.2.6.8 and 6.1.1.4'  
'Ni' 'Ni' 0.3390 1.1120  
'International Tables Vol C Tables 4.2.6.8 and 6.1.1.4'  
'O' 'O' 0.0110 0.0060  
'International Tables Vol C Tables 4.2.6.8 and 6.1.1.4'
```

```
_space_group_crystal_system  triclinic  
_space_group_IT_number       2  
_space_group_name_H-M_alt    'P -1'  
_space_group_name_Hall       '-P 1'
```

```
_shelx_space_group_comment
```

;

The symmetry employed for this shelxl refinement is uniquely defined by the following loop, which should always be used as a source of symmetry information in preference to the above space-group names. They are only intended as comments.

;

loop\_

\_space\_group\_symop\_operation\_xyz

'x, y, z'

'-x, -y, -z'

\_cell\_length\_a 13.536(5)  
\_cell\_length\_b 15.627(5)  
\_cell\_length\_c 15.848(5)  
\_cell\_angle\_alpha 102.096(5)  
\_cell\_angle\_beta 106.057(5)  
\_cell\_angle\_gamma 103.057(5)  
\_cell\_volume 3002.8(18)  
\_cell\_formula\_units\_Z 1  
\_cell\_measurement\_temperature 100(2)  
\_cell\_measurement\_reflns\_used 999  
\_cell\_measurement\_theta\_min 2.189  
\_cell\_measurement\_theta\_max 28.308

\_exptl\_crystal\_description block  
\_exptl\_crystal\_colour green  
\_exptl\_crystal\_density\_meas ?  
\_exptl\_crystal\_density\_method ?  
\_exptl\_crystal\_density\_diffn 1.666  
\_exptl\_crystal\_F\_000 1568  
\_exptl\_transmission\_factor\_min ?  
\_exptl\_transmission\_factor\_max ?  
\_exptl\_crystal\_size\_max 0.500  
\_exptl\_crystal\_size\_mid 0.200  
\_exptl\_crystal\_size\_min 0.100  
\_exptl\_absorpt\_coefficient\_mu 1.418  
\_shelx\_estimated\_absorpt\_T\_min 0.538  
\_shelx\_estimated\_absorpt\_T\_max 0.871  
\_exptl\_absorpt\_correction\_type ?  
\_exptl\_absorpt\_correction\_T\_min ?  
\_exptl\_absorpt\_correction\_T\_max ?  
\_exptl\_absorpt\_process\_details SADABS  
\_exptl\_absorpt\_special\_details ?  
\_diffn\_ambient\_temperature 100(2)  
\_diffn\_radiation\_wavelength 0.71069  
\_diffn\_radiation\_type MoK\alpha  
\_diffn\_source 'fine-focus sealed tube'  
\_diffn\_measurement\_device\_type 'CCD area detector'  
\_diffn\_measurement\_method 'phi and omega scan'  
\_diffn\_detector\_area\_resol\_mean ?

```

_diffrn_reflns_number      19942
_diffrn_reflns_av_unetI/netI  0.0932
_diffrn_reflns_av_R_equivalents 0.0364
_diffrn_reflns_limit_h_min   -18
_diffrn_reflns_limit_h_max    14
_diffrn_reflns_limit_k_min   -20
_diffrn_reflns_limit_k_max    20
_diffrn_reflns_limit_l_min   -21
_diffrn_reflns_limit_l_max    19
_diffrn_reflns_theta_min     2.189
_diffrn_reflns_theta_max     28.308
_diffrn_reflns_theta_full    25.240
_diffrn_measured_fraction_theta_max 0.956
_diffrn_measured_fraction_theta_full 0.985
_diffrn_reflns_Laue_measured_fraction_max 0.956
_diffrn_reflns_Laue_measured_fraction_full 0.985
_diffrn_reflns_point_group_measured_fraction_max 0.956
_diffrn_reflns_point_group_measured_fraction_full 0.985
_reflns_number_total        14286
_reflns_number_gt           8925
_reflns_threshold_expression 'I > 2\sigma(I)'
_reflns_Friedel_coverage    0.000
_reflns_Friedel_fraction_max .
_reflns_Friedel_fraction_full .

```

```
_reflns_special_details
```

```
;
```

Reflections were merged by SHELXL according to the crystal class for the calculation of statistics and refinement.

\_reflns\_Friedel\_fraction is defined as the number of unique Friedel pairs measured divided by the number that would be possible theoretically, ignoring centric projections and systematic absences.

```
;
```

```

_computing_data_collection  'Bruker SMART APEX'
_computing_cell_refinement  'Bruker SMART'
_computing_data_reduction   'Bruker SAINT PLUS'
_computing_structure_solution 'SIR97(Altomare, et. al. 1999)'
_computing_structure_refinement 'SHELXL-2016/4 (Sheldrick, 2016)'
_computing_molecular_graphics ?
_computing_publication_material ?
_refine_special_details     ?
_refine_ls_structure_factor_coef Fsqd
_refine_ls_matrix_type      full

```

```

_refine_ls_weighting_scheme    calc
_refine_ls_weighting_details
'w=1/[s^2^(Fo^2)+(0.1361P)^2+7.9932P] where P=(Fo^2+2Fc^2)/3'
_atom_sites_solution_primary   ?
_atom_sites_solution_secondary ?
_atom_sites_solution_hydrogens mixed
_refine_ls_hydrogen_treatment  constr
_refine_ls_extinction_method   none
_refine_ls_extinction_coef     .
_refine_ls_number_reflns      14286
_refine_ls_number_parameters   808
_refine_ls_number_restraints   820
_refine_ls_R_factor_all        0.1320
_refine_ls_R_factor_gt         0.0814
_refine_ls_wR_factor_ref       0.2791
_refine_ls_wR_factor_gt        0.2015
_refine_ls_goodness_of_fit_ref 1.111
_refine_ls_restrained_S_all    1.084
_refine_ls_shift/su_max        0.016
_refine_ls_shift/su_mean       0.001

```

loop\_

```

_atom_site_label
_atom_site_type_symbol
_atom_site_fract_x
_atom_site_fract_y
_atom_site_fract_z
_atom_site_U_iso_or_equiv
_atom_site_adp_type
_atom_site_occupancy
_atom_site_site_symmetry_order
_atom_site_calc_flag
_atom_site_refinement_flags_posn
_atom_site_refinement_flags_adp
_atom_site_refinement_flags_occupancy
_atom_site_disorder_assembly
_atom_site_disorder_group
NI1 Ni 0.27441(7) 0.63047(6) 0.39787(6) 0.0225(2) Uani 1 1 d . . . . .
NI2 Ni 0.28624(7) 0.55065(6) 0.61349(6) 0.0219(2) Uani 1 1 d . . . . .
NI3 Ni 0.04130(7) 0.27823(6) 0.29371(6) 0.0218(2) Uani 1 1 d . . . . .
NI4 Ni 0.11680(7) 0.88983(6) 0.52674(6) 0.0244(2) Uani 1 1 d . . . . .
CL1 Cl 0.33554(18) 0.94852(15) 0.24778(15) 0.0446(5) Uani 1 1 d . . . . .
CL2 Cl 0.26334(18) 0.37411(17) -0.02064(16) 0.0507(6) Uani 1 1 d . . . . .
O1 O 0.2475(4) 0.7457(3) 0.4612(3) 0.0230(9) Uani 1 1 d . . . . .
O2 O 0.2455(4) 0.8903(3) 0.4845(4) 0.0278(10) Uani 1 1 d . . . . .
O3 O 0.3443(4) 0.6150(3) 0.5239(3) 0.0227(9) Uani 1 1 d . . . . .

```



O4 O 0.4398(4) 0.5445(3) 0.6028(3) 0.0260(10) Uani 1 1 d . . . . .  
O5 O 0.1494(4) 0.5864(3) 0.5866(3) 0.0262(10) Uani 1 1 d . . . . .  
O6 O 0.0442(4) 0.6568(3) 0.6352(3) 0.0260(10) Uani 1 1 d . . . . .  
O7 O 0.2145(4) 0.4391(3) 0.5042(3) 0.0246(10) Uani 1 1 d . . . . .  
O8 O 0.1456(4) 0.2927(3) 0.4241(3) 0.0215(9) Uani 1 1 d . . . . .  
O9 O 0.1313(4) 0.4035(3) 0.2949(3) 0.0245(10) Uani 1 1 d . . . . .  
O10 O 0.2920(4) 0.5060(3) 0.3395(3) 0.0261(10) Uani 1 1 d . . . . .  
O11 O -0.0382(4) 0.1557(3) 0.3125(3) 0.0254(10) Uani 1 1 d . . . . .  
O12 O -0.0090(4) 0.9058(3) 0.5735(3) 0.0275(10) Uani 1 1 d . . . . .  
O13 O 0.1250(3) 0.5615(3) 0.4038(3) 0.0225(9) Uani 1 1 d . . . . .  
H13A H 0.128255 0.571490 0.458884 0.034 Uiso 1 1 d R U . . .  
H13B H 0.110155 0.503420 0.380904 0.034 Uiso 1 1 d R U . . .  
O14 O 0.0717(4) 0.7500(3) 0.5058(3) 0.0274(10) Uani 1 1 d . . . . .  
H14A H 0.081926 0.738575 0.558478 0.041 Uiso 1 1 d R U . . .  
H14B H 0.110716 0.726424 0.478068 0.041 Uiso 1 1 d R U . . .  
O15 O 0.2194(4) 0.9064(4) 0.6584(3) 0.0307(11) Uani 1 1 d . . . . .  
H15A H 0.270078 0.955214 0.675613 0.046 Uiso 1 1 d R U . . .  
H15B H 0.184738 0.890624 0.692692 0.046 Uiso 1 1 d R U . . .  
O16 O 0.1586(4) 1.0310(3) 0.5453(3) 0.0288(11) Uani 1 1 d . . . . .  
H16 H 0.114204 1.049741 0.510042 0.043 Uiso 1 1 d R U . . .  
O17 O 0.0141(4) 0.8723(3) 0.3989(3) 0.0277(10) Uani 1 1 d . . . . .  
O18 O 0.2726(6) 0.8582(6) 0.2357(6) 0.084(3) Uani 1 1 d . . . . .  
O19 O 0.3218(11) 1.0120(8) 0.3144(7) 0.118(4) Uani 1 1 d . . . . .  
O20 O 0.3090(10) 0.9721(6) 0.1669(6) 0.116(4) Uani 1 1 d . . . . .  
O21 O 0.4441(7) 0.9525(7) 0.2798(9) 0.110(4) Uani 1 1 d . . . . .  
O22 O 0.3632(7) 0.4414(8) 0.0113(8) 0.130(5) Uani 1 1 d . . . . .  
O23 O 0.2662(6) 0.2936(6) 0.0063(5) 0.074(2) Uani 1 1 d . . . . .  
O24 O 0.1884(8) 0.4086(7) 0.0157(6) 0.093(3) Uani 1 1 d . . . . .  
O25 O 0.2173(6) 0.3518(5) -0.1180(5) 0.0571(17) Uani 1 1 d . . . . .  
C5S C 0.1750(13) 1.0206(10) -0.0249(9) 0.105(5) Uani 1 1 d D . . . . .  
H3SA H 0.187725 0.972112 -0.064872 0.158 Uiso 1 1 calc R U . . .  
H3SB H 0.241970 1.068070 0.009387 0.158 Uiso 1 1 calc R U . . .  
H3SC H 0.125641 1.045443 -0.060862 0.158 Uiso 1 1 calc R U . . .  
N1 N 0.1989(5) 0.6367(4) 0.2684(4) 0.0269(12) Uani 1 1 d . . . . .  
N2 N 0.4297(4) 0.7048(4) 0.4054(4) 0.0232(11) Uani 1 1 d . . . . .  
N3 N 0.3752(5) 0.6724(4) 0.7152(4) 0.0259(12) Uani 1 1 d . . . . .  
N4 N 0.2559(4) 0.4813(4) 0.7057(4) 0.0232(11) Uani 1 1 d . . . . .  
N5 N -0.0875(4) 0.2436(4) 0.1708(4) 0.0241(11) Uani 1 1 d . . . . .  
N6 N 0.1278(4) 0.2084(4) 0.2254(4) 0.0237(11) Uani 1 1 d . . . . .  
N7 N -0.0256(5) 0.8614(4) 0.2497(4) 0.0325(14) Uani 1 1 d . . . . .  
C1 C 0.0955(6) 0.6351(5) 0.2447(5) 0.0325(16) Uani 1 1 d . . . . .  
H1 H 0.065392 0.644541 0.290663 0.039 Uiso 1 1 calc R U . . .  
C2 C 0.0304(7) 0.6199(6) 0.1538(6) 0.0397(18) Uani 1 1 d . . . . .  
H2 H -0.041282 0.619228 0.139282 0.048 Uiso 1 1 calc R U . . .  
C3 C 0.0761(7) 0.6063(6) 0.0877(6) 0.0430(19) Uani 1 1 d . . . . .  
H3 H 0.034769 0.594292 0.026505 0.052 Uiso 1 1 calc R U . . .

C4 C 0.1840(7) 0.6102(6) 0.1108(5) 0.0394(18) Uani 1 1 d . . . . .  
H4 H 0.215371 0.601529 0.065686 0.047 Uiso 1 1 calc R U . . . .  
C5 C 0.2441(6) 0.6271(5) 0.2019(5) 0.0282(14) Uani 1 1 d . . . . .  
C6 C 0.3641(6) 0.6365(6) 0.2329(6) 0.0383(17) Uani 1 1 d . . . . .  
H6A H 0.374663 0.581633 0.248379 0.046 Uiso 1 1 calc R U . . . .  
H6B H 0.390649 0.641958 0.182745 0.046 Uiso 1 1 calc R U . . . .  
C7 C 0.4286(6) 0.7199(5) 0.3157(5) 0.0328(15) Uani 1 1 d . . . . .  
H7A H 0.502377 0.738633 0.316646 0.039 Uiso 1 1 calc R U . . . .  
H7B H 0.399010 0.769981 0.308366 0.039 Uiso 1 1 calc R U . . . .  
C8 C 0.4688(5) 0.7938(5) 0.4784(5) 0.0266(14) Uani 1 1 d . . . . .  
H8A H 0.541946 0.824543 0.483632 0.032 Uiso 1 1 calc R U . . . .  
H8B H 0.471760 0.781061 0.536250 0.032 Uiso 1 1 calc R U . . . .  
C9 C 0.4020(5) 0.8600(5) 0.4648(5) 0.0282(15) Uani 1 1 d . . . . .  
H9A H 0.441389 0.918760 0.510672 0.034 Uiso 1 1 calc R U . . . .  
H9B H 0.394547 0.869478 0.405068 0.034 Uiso 1 1 calc R U . . . .  
C10 C 0.2897(5) 0.8284(5) 0.4710(5) 0.0239(13) Uani 1 1 d . . . . .  
C11 C 0.5048(5) 0.6512(5) 0.4289(5) 0.0260(14) Uani 1 1 d . . . . .  
H11A H 0.573328 0.682897 0.425462 0.031 Uiso 1 1 calc R U . . . .  
H11B H 0.477002 0.592327 0.382090 0.031 Uiso 1 1 calc R U . . . .  
C12 C 0.5265(5) 0.6330(5) 0.5225(5) 0.0290(15) Uani 1 1 d . . . . .  
H12A H 0.570937 0.592219 0.525213 0.035 Uiso 1 1 calc R U . . . .  
H12B H 0.568837 0.690721 0.569083 0.035 Uiso 1 1 calc R U . . . .  
C13 C 0.4310(5) 0.5923(5) 0.5485(4) 0.0231(13) Uani 1 1 d . . . . .  
C14 C 0.3759(6) 0.7517(5) 0.6970(5) 0.0308(15) Uani 1 1 d . . . . .  
H14 H 0.320872 0.752510 0.646975 0.037 Uiso 1 1 calc R U . . . .  
C15 C 0.4551(7) 0.8325(6) 0.7493(6) 0.0385(17) Uani 1 1 d . . . . .  
H15 H 0.453112 0.886938 0.734862 0.046 Uiso 1 1 calc R U . . . .  
C16 C 0.5376(7) 0.8321(6) 0.8234(6) 0.0396(18) Uani 1 1 d . . . . .  
H16A H 0.593254 0.885498 0.858674 0.048 Uiso 1 1 calc R U . . . .  
C17 C 0.5349(6) 0.7501(5) 0.8437(5) 0.0332(16) Uani 1 1 d . . . . .  
H17 H 0.587671 0.748050 0.894639 0.040 Uiso 1 1 calc R U . . . .  
C18 C 0.4533(6) 0.6708(5) 0.7878(5) 0.0292(14) Uani 1 1 d . . . . .  
C19 C 0.4452(6) 0.5778(5) 0.8048(5) 0.0317(15) Uani 1 1 d . . . . .  
H19A H 0.496823 0.586088 0.864484 0.038 Uiso 1 1 calc R U . . . .  
H19B H 0.464260 0.539751 0.758954 0.038 Uiso 1 1 calc R U . . . .  
C20 C 0.3331(5) 0.5281(5) 0.8018(5) 0.0281(14) Uani 1 1 d . . . . .  
H20A H 0.338544 0.482721 0.834816 0.034 Uiso 1 1 calc R U . . . .  
H20B H 0.304721 0.572003 0.832698 0.034 Uiso 1 1 calc R U . . . .  
C21 C 0.2703(5) 0.3893(5) 0.6762(5) 0.0251(13) Uani 1 1 d . . . . .  
H21A H 0.263881 0.358881 0.722746 0.030 Uiso 1 1 calc R U . . . .  
H21B H 0.343482 0.398759 0.675863 0.030 Uiso 1 1 calc R U . . . .  
C22 C 0.1945(6) 0.3235(5) 0.5835(4) 0.0248(13) Uani 1 1 d . . . . .  
H22A H 0.216735 0.268400 0.574040 0.030 Uiso 1 1 calc R U . . . .  
H22B H 0.122837 0.305814 0.587379 0.030 Uiso 1 1 calc R U . . . .  
C23 C 0.1857(5) 0.3559(4) 0.4983(4) 0.0201(12) Uani 1 1 d . . . . .  
C24 C 0.1429(5) 0.4711(5) 0.7055(5) 0.0257(14) Uani 1 1 d . . . . .

H24A H 0.132511 0.442870 0.752664 0.031 Uiso 1 1 calc R U ...  
H24B H 0.093009 0.429914 0.646855 0.031 Uiso 1 1 calc R U ...  
C25 C 0.1156(6) 0.5605(5) 0.7219(5) 0.0254(14) Uani 1 1 d ...  
H25A H 0.172757 0.604782 0.775184 0.030 Uiso 1 1 calc R U ...  
H25B H 0.049951 0.550207 0.736907 0.030 Uiso 1 1 calc R U ...  
C26 C 0.1001(5) 0.6033(5) 0.6426(4) 0.0191(12) Uani 1 1 d ...  
C27 C -0.1891(6) 0.2195(5) 0.1724(5) 0.0308(15) Uani 1 1 d ...  
H27 H -0.199318 0.217105 0.227604 0.037 Uiso 1 1 calc R U ...  
C28 C -0.2785(6) 0.1982(6) 0.0949(5) 0.0366(17) Uani 1 1 d ...  
H28 H -0.347634 0.183301 0.098053 0.044 Uiso 1 1 calc R U ...  
C29 C -0.2630(7) 0.1995(7) 0.0127(6) 0.045(2) Uani 1 1 d ...  
H29 H -0.321715 0.185894 -0.040494 0.054 Uiso 1 1 calc R U ...  
C30 C -0.1604(7) 0.2209(6) 0.0104(5) 0.0399(18) Uani 1 1 d ...  
H30 H -0.149143 0.220656 -0.044978 0.048 Uiso 1 1 calc R U ...  
C31 C -0.0723(6) 0.2432(5) 0.0906(5) 0.0273(14) Uani 1 1 d ...  
C32 C 0.0414(6) 0.2673(5) 0.0924(5) 0.0282(14) Uani 1 1 d ...  
H32A H 0.080249 0.328985 0.132627 0.034 Uiso 1 1 calc R U ...  
H32B H 0.042250 0.266317 0.031202 0.034 Uiso 1 1 calc R U ...  
C33 C 0.0986(6) 0.1996(5) 0.1261(5) 0.0275(14) Uani 1 1 d ...  
H33A H 0.052084 0.137636 0.092433 0.033 Uiso 1 1 calc R U ...  
H33B H 0.163894 0.207400 0.110645 0.033 Uiso 1 1 calc R U ...  
C34 C 0.2424(5) 0.2592(5) 0.2725(5) 0.0237(13) Uani 1 1 d ...  
H34A H 0.284456 0.223414 0.249654 0.028 Uiso 1 1 calc R U ...  
H34B H 0.259433 0.264654 0.337356 0.028 Uiso 1 1 calc R U ...  
C35 C 0.2786(6) 0.3562(5) 0.2619(5) 0.0269(14) Uani 1 1 d ...  
H35A H 0.356405 0.380113 0.290045 0.032 Uiso 1 1 calc R U ...  
H35B H 0.261266 0.350518 0.196979 0.032 Uiso 1 1 calc R U ...  
C36 C 0.2299(5) 0.4266(5) 0.3028(4) 0.0200(12) Uani 1 1 d ...  
C37 C 0.1102(6) 0.1134(4) 0.2357(5) 0.0242(13) Uani 1 1 d ...  
H37A H 0.162278 0.088055 0.216488 0.029 Uiso 1 1 calc R U ...  
H37B H 0.039083 0.075749 0.193722 0.029 Uiso 1 1 calc R U ...  
C38 C 0.1187(6) 0.1043(5) 0.3309(5) 0.0267(14) Uani 1 1 d ...  
H38A H 0.184953 0.148452 0.375005 0.032 Uiso 1 1 calc R U ...  
H38B H 0.122830 0.043426 0.332223 0.032 Uiso 1 1 calc R U ...  
C39 C 0.0234(5) 0.1198(4) 0.3598(5) 0.0231(13) Uani 1 1 d ...  
C40 C 0.0376(6) 0.8608(5) 0.3283(5) 0.0317(15) Uani 1 1 d ...  
H40 H 0.103730 0.851181 0.331266 0.038 Uiso 1 1 calc R U ...  
C41 C 0.0047(8) 0.8455(7) 0.1671(6) 0.046(2) Uani 1 1 d ...  
H41A H 0.074357 0.835924 0.181816 0.069 Uiso 1 1 calc R U ...  
H41B H 0.007362 0.898005 0.144326 0.069 Uiso 1 1 calc R U ...  
H41C H -0.047655 0.792251 0.120934 0.069 Uiso 1 1 calc R U ...  
C42 C -0.1284(7) 0.8773(7) 0.2400(6) 0.050(2) Uani 1 1 d ...  
H42A H -0.142509 0.880856 0.296560 0.075 Uiso 1 1 calc R U ...  
H42B H -0.184095 0.827661 0.191796 0.075 Uiso 1 1 calc R U ...  
H42C H -0.127185 0.933886 0.225108 0.075 Uiso 1 1 calc R U ...  
C43 C 0.2651(7) 1.0830(6) 0.5536(7) 0.044(2) Uani 1 1 d ...

H43A H 0.271749 1.074172 0.493818 0.066 Uiso 1 1 calc R U . . .  
H43B H 0.317889 1.062623 0.591618 0.066 Uiso 1 1 calc R U . . .  
H43C H 0.276553 1.147021 0.580741 0.066 Uiso 1 1 calc R U . . .  
O3S O 0.1285(10) 0.9838(8) 0.0391(9) 0.135(4) Uani 1 1 d D . . . . .  
H5S H 0.176743 0.980585 0.083813 0.203 Uiso 1 1 d R U . . .  
O1S O 0.4622(10) 1.1809(10) 0.9091(10) 0.148(5) Uani 1 1 d . . . . .  
O2S O 0.3493(9) 1.0773(8) 0.7816(7) 0.123(4) Uani 1 1 d . . . . .  
C3S C 0.4508(17) 1.2610(12) 0.8784(16) 0.152(8) Uani 1 1 d . . . . .  
H0AA H 0.379833 1.267764 0.871828 0.183 Uiso 1 1 calc R U . . .  
H0AB H 0.462929 1.256850 0.820304 0.183 Uiso 1 1 calc R U . . .  
C4S C 0.5381(17) 1.3401(13) 0.9550(12) 0.139(7) Uani 1 1 d . . . . .  
H4SA H 0.518525 1.348663 1.009324 0.208 Uiso 1 1 calc R U . . .  
H4SB H 0.545330 1.395267 0.936521 0.208 Uiso 1 1 calc R U . . .  
H4SC H 0.605374 1.326405 0.967636 0.208 Uiso 1 1 calc R U . . .  
C2S C 0.4064(12) 1.0953(12) 0.8573(11) 0.100(4) Uani 1 1 d . . . . .  
C1S C 0.431(2) 1.0292(18) 0.9100(19) 0.208(12) Uani 1 1 d . . . . .  
H1SA H 0.402319 1.036438 0.959318 0.312 Uiso 1 1 calc R U . . .  
H1SB H 0.507387 1.041101 0.934487 0.312 Uiso 1 1 calc R U . . .  
H1SC H 0.398097 0.967586 0.869898 0.312 Uiso 1 1 calc R U . . .

loop\_

\_atom\_site\_aniso\_label  
\_atom\_site\_aniso\_U\_11  
\_atom\_site\_aniso\_U\_22  
\_atom\_site\_aniso\_U\_33  
\_atom\_site\_aniso\_U\_23  
\_atom\_site\_aniso\_U\_13  
\_atom\_site\_aniso\_U\_12  
NI1 0.0178(4) 0.0271(5) 0.0242(4) 0.0088(4) 0.0088(3) 0.0067(4)  
NI2 0.0179(4) 0.0282(5) 0.0215(4) 0.0087(3) 0.0079(3) 0.0080(4)  
NI3 0.0188(4) 0.0262(5) 0.0221(4) 0.0070(3) 0.0090(3) 0.0073(4)  
NI4 0.0208(4) 0.0281(5) 0.0284(5) 0.0112(4) 0.0110(4) 0.0089(4)  
CL1 0.0414(11) 0.0495(12) 0.0438(12) 0.0211(10) 0.0140(9) 0.0088(10)  
CL2 0.0411(12) 0.0607(14) 0.0469(13) 0.0277(11) 0.0065(10) 0.0082(10)  
O1 0.021(2) 0.023(2) 0.029(2) 0.0046(19) 0.017(2) 0.0069(18)  
O2 0.020(2) 0.029(2) 0.041(3) 0.011(2) 0.018(2) 0.009(2)  
O3 0.018(2) 0.032(3) 0.024(2) 0.0099(19) 0.0106(18) 0.0110(19)  
O4 0.022(2) 0.042(3) 0.026(2) 0.016(2) 0.0145(19) 0.018(2)  
O5 0.018(2) 0.036(3) 0.022(2) 0.007(2) 0.0055(18) 0.007(2)  
O6 0.023(2) 0.036(3) 0.028(3) 0.012(2) 0.016(2) 0.015(2)  
O7 0.025(2) 0.023(2) 0.024(2) 0.0047(18) 0.0085(19) 0.0058(19)  
O8 0.019(2) 0.029(2) 0.017(2) 0.0065(17) 0.0055(17) 0.0091(19)  
O9 0.022(2) 0.024(2) 0.027(2) 0.009(2) 0.0096(19) 0.0031(19)  
O10 0.022(2) 0.026(2) 0.027(2) 0.0042(19) 0.010(2) 0.0042(19)  
O11 0.023(2) 0.022(2) 0.029(3) 0.0086(19) 0.008(2) 0.0042(19)  
O12 0.023(2) 0.033(3) 0.034(3) 0.015(2) 0.016(2) 0.011(2)

O13 0.016(2) 0.026(2) 0.025(2) 0.0050(19) 0.0100(18) 0.0039(19)  
O14 0.029(3) 0.025(2) 0.031(3) 0.010(2) 0.011(2) 0.009(2)  
O15 0.023(2) 0.048(3) 0.023(2) 0.015(2) 0.0071(19) 0.010(2)  
O16 0.027(2) 0.030(3) 0.036(3) 0.014(2) 0.012(2) 0.013(2)  
O17 0.025(2) 0.040(3) 0.019(2) 0.009(2) 0.0083(19) 0.009(2)  
O18 0.060(5) 0.071(5) 0.097(6) 0.055(5) -0.010(4) -0.011(4)  
O19 0.194(12) 0.121(8) 0.093(7) 0.041(6) 0.086(8) 0.091(8)  
O20 0.187(10) 0.060(5) 0.051(4) 0.030(4) 0.000(5) -0.022(6)  
O21 0.051(4) 0.104(7) 0.209(11) 0.093(8) 0.060(6) 0.026(5)  
O22 0.064(5) 0.150(9) 0.120(8) 0.085(7) -0.030(5) -0.036(5)  
O23 0.075(5) 0.097(6) 0.073(5) 0.057(5) 0.027(4) 0.037(5)  
O24 0.113(7) 0.120(8) 0.067(5) 0.026(5) 0.041(5) 0.063(6)  
O25 0.057(4) 0.073(5) 0.048(3) 0.033(3) 0.018(3) 0.018(4)  
C5S 0.149(14) 0.080(10) 0.056(8) 0.010(6) -0.009(7) 0.038(10)  
N1 0.021(3) 0.037(3) 0.025(3) 0.011(3) 0.009(2) 0.010(3)  
N2 0.013(2) 0.027(3) 0.028(3) 0.005(2) 0.008(2) 0.003(2)  
N3 0.023(3) 0.028(3) 0.023(3) 0.007(2) 0.006(2) 0.003(2)  
N4 0.016(2) 0.033(3) 0.026(3) 0.016(2) 0.007(2) 0.011(2)  
N5 0.018(2) 0.029(3) 0.021(3) 0.004(2) 0.000(2) 0.011(2)  
N6 0.023(3) 0.024(3) 0.024(3) 0.002(2) 0.011(2) 0.007(2)  
N7 0.034(3) 0.038(4) 0.024(3) 0.005(3) 0.008(2) 0.012(3)  
C1 0.023(3) 0.041(4) 0.034(4) 0.017(3) 0.006(3) 0.010(3)  
C2 0.028(4) 0.046(5) 0.041(4) 0.022(4) 0.004(3) 0.006(4)  
C3 0.038(4) 0.053(5) 0.031(4) 0.020(4) 0.003(3) 0.003(4)  
C4 0.050(4) 0.046(5) 0.023(3) 0.010(3) 0.015(3) 0.014(4)  
C5 0.029(3) 0.032(4) 0.025(3) 0.011(3) 0.012(3) 0.006(3)  
C6 0.036(4) 0.049(5) 0.035(4) 0.011(3) 0.017(3) 0.017(4)  
C7 0.030(4) 0.034(4) 0.040(4) 0.020(3) 0.017(3) 0.006(3)  
C8 0.019(3) 0.025(3) 0.035(4) 0.012(3) 0.010(3) 0.001(3)  
C9 0.016(3) 0.034(4) 0.043(4) 0.015(3) 0.020(3) 0.007(3)  
C10 0.016(3) 0.032(3) 0.027(3) 0.010(3) 0.010(3) 0.007(2)  
C11 0.012(3) 0.037(4) 0.028(3) 0.008(3) 0.008(3) 0.007(3)  
C12 0.019(3) 0.038(4) 0.033(4) 0.010(3) 0.015(3) 0.007(3)  
C13 0.013(3) 0.030(3) 0.019(3) 0.006(3) 0.001(2) 0.003(2)  
C14 0.032(4) 0.030(3) 0.030(4) 0.011(3) 0.007(3) 0.011(3)  
C15 0.038(4) 0.036(4) 0.039(4) 0.010(3) 0.014(3) 0.005(3)  
C16 0.034(4) 0.033(4) 0.038(4) -0.002(3) 0.008(3) 0.001(3)  
C17 0.018(3) 0.043(4) 0.034(4) 0.006(3) 0.007(3) 0.007(3)  
C18 0.024(3) 0.039(4) 0.023(3) 0.005(3) 0.009(2) 0.007(3)  
C19 0.020(3) 0.042(4) 0.033(4) 0.015(3) 0.005(3) 0.010(3)  
C20 0.020(3) 0.038(4) 0.028(3) 0.012(3) 0.007(3) 0.011(3)  
C21 0.024(3) 0.030(3) 0.025(3) 0.014(3) 0.011(3) 0.007(3)  
C22 0.026(3) 0.030(3) 0.023(3) 0.011(3) 0.010(3) 0.011(3)  
C23 0.014(3) 0.024(3) 0.021(3) -0.001(2) 0.009(2) 0.007(2)  
C24 0.021(3) 0.032(4) 0.029(4) 0.014(3) 0.013(3) 0.005(3)  
C25 0.026(3) 0.027(3) 0.021(3) 0.007(3) 0.004(3) 0.008(3)

C26 0.008(3) 0.032(3) 0.019(3) 0.005(2) 0.008(2) 0.006(2)  
 C27 0.020(3) 0.040(4) 0.031(3) 0.008(3) 0.007(3) 0.011(3)  
 C28 0.026(3) 0.050(5) 0.033(4) 0.014(4) 0.007(3) 0.012(4)  
 C29 0.033(4) 0.065(6) 0.030(4) 0.012(4) 0.006(3) 0.011(4)  
 C30 0.040(4) 0.055(5) 0.025(3) 0.013(4) 0.011(3) 0.014(4)  
 C31 0.029(3) 0.029(4) 0.024(3) 0.008(3) 0.011(3) 0.007(3)  
 C32 0.032(3) 0.032(4) 0.021(3) 0.008(3) 0.010(3) 0.010(3)  
 C33 0.027(3) 0.031(4) 0.021(3) 0.002(3) 0.008(3) 0.007(3)  
 C34 0.014(3) 0.030(3) 0.029(3) 0.005(3) 0.011(2) 0.007(3)  
 C35 0.031(4) 0.026(3) 0.027(3) 0.009(3) 0.014(3) 0.007(3)  
 C36 0.020(3) 0.029(3) 0.013(3) 0.004(2) 0.009(2) 0.009(2)  
 C37 0.024(3) 0.022(3) 0.028(3) 0.003(3) 0.015(3) 0.004(3)  
 C38 0.025(3) 0.029(4) 0.030(3) 0.007(3) 0.014(3) 0.012(3)  
 C39 0.022(3) 0.022(3) 0.029(3) 0.007(3) 0.014(3) 0.005(3)  
 C40 0.035(4) 0.026(4) 0.032(3) 0.009(3) 0.010(3) 0.008(3)  
 C41 0.059(6) 0.057(6) 0.027(4) 0.012(4) 0.022(4) 0.017(5)  
 C42 0.046(5) 0.065(6) 0.045(5) 0.016(5) 0.018(4) 0.029(5)  
 C43 0.038(4) 0.032(4) 0.069(6) 0.027(4) 0.024(4) 0.008(3)  
 O3S 0.140(11) 0.114(9) 0.150(11) 0.031(8) 0.051(9) 0.041(8)  
 O1S 0.116(10) 0.126(8) 0.139(10) -0.030(7) 0.026(8) 0.004(8)  
 O2S 0.109(8) 0.107(8) 0.085(6) 0.002(6) -0.014(6) -0.014(6)  
 C3S 0.162(17) 0.087(10) 0.22(2) -0.001(10) 0.148(15) 0.003(10)  
 C4S 0.186(19) 0.141(13) 0.108(13) 0.021(10) 0.100(13) 0.039(12)  
 C2S 0.077(9) 0.112(9) 0.074(7) -0.014(7) 0.015(6) 0.007(8)  
 C1S 0.22(3) 0.20(2) 0.21(3) 0.10(2) 0.05(2) 0.09(2)

\_geom\_special\_details

;

All esds (except the esd in the dihedral angle between two l.s. planes)  
 are estimated using the full covariance matrix. The cell esds are taken  
 into account individually in the estimation of esds in distances, angles  
 and torsion angles; correlations between esds in cell parameters are only  
 used when they are defined by crystal symmetry. An approximate (isotropic)  
 treatment of cell esds is used for estimating esds involving l.s. planes.

;

loop\_

\_geom\_bond\_atom\_site\_label\_1  
\_geom\_bond\_atom\_site\_label\_2  
\_geom\_bond\_distance  
\_geom\_bond\_site\_symmetry\_2  
\_geom\_bond\_publ\_flag  
 N11 O1 2.031(4) . ?  
 N11 O3 2.049(5) . ?  
 N11 N1 2.058(6) . ?  
 N11 O10 2.067(5) . ?

NI1 O13 2.103(4) . ?  
NI1 N2 2.117(5) . ?  
NI2 O7 2.006(5) . ?  
NI2 O5 2.014(5) . ?  
NI2 N3 2.067(6) . ?  
NI2 N4 2.067(5) . ?  
NI2 O3 2.123(5) . ?  
NI2 O4 2.154(4) . ?  
NI2 C13 2.479(7) . ?  
NI3 O9 2.053(5) . ?  
NI3 O8 2.088(4) . ?  
NI3 N5 2.092(5) . ?  
NI3 O11 2.097(5) . ?  
NI3 O6 2.100(4) 2\_566 ?  
NI3 N6 2.126(5) . ?  
NI4 O2 2.030(5) . ?  
NI4 O17 2.036(5) . ?  
NI4 O14 2.059(5) . ?  
NI4 O12 2.079(5) . ?  
NI4 O16 2.084(5) . ?  
NI4 O15 2.087(5) . ?  
CL1 O19 1.373(9) . ?  
CL1 O20 1.383(8) . ?  
CL1 O21 1.397(9) . ?  
CL1 O18 1.418(7) . ?  
CL2 O22 1.395(9) . ?  
CL2 O23 1.417(7) . ?  
CL2 O25 1.426(7) . ?  
CL2 O24 1.446(9) . ?  
O1 C10 1.247(8) . ?  
O2 C10 1.259(8) . ?  
O3 C13 1.284(7) . ?  
O4 C13 1.252(8) . ?  
O5 C26 1.269(7) . ?  
O6 C26 1.251(7) . ?  
O6 NI3 2.100(4) 2\_566 ?  
O7 C23 1.246(8) . ?  
O8 C23 1.253(7) . ?  
O9 C36 1.264(8) . ?  
O10 C36 1.241(8) . ?  
O11 C39 1.271(8) . ?  
O12 C39 1.254(8) 2\_566 ?  
O16 C43 1.442(9) . ?  
O17 C40 1.235(9) . ?  
C5S O3S 1.480(14) . ?  
N1 C1 1.338(9) . ?

N1 C5 1.356(9) . ?  
N2 C11 1.477(8) . ?  
N2 C8 1.485(9) . ?  
N2 C7 1.486(9) . ?  
N3 C14 1.328(9) . ?  
N3 C18 1.340(9) . ?  
N4 C21 1.489(9) . ?  
N4 C24 1.501(8) . ?  
N4 C20 1.500(9) . ?  
N5 C31 1.342(9) . ?  
N5 C27 1.350(9) . ?  
N6 C34 1.466(8) . ?  
N6 C33 1.480(8) . ?  
N6 C37 1.500(8) . ?  
N7 C40 1.304(10) . ?  
N7 C42 1.441(10) . ?  
N7 C41 1.468(10) . ?  
C1 C2 1.403(11) . ?  
C2 C3 1.361(12) . ?  
C3 C4 1.387(12) . ?  
C4 C5 1.382(10) . ?  
C5 C6 1.524(10) . ?  
C6 C7 1.522(11) . ?  
C8 C9 1.531(9) . ?  
C9 C10 1.526(9) . ?  
C11 C12 1.530(10) . ?  
C12 C13 1.509(9) . ?  
C14 C15 1.374(11) . ?  
C15 C16 1.382(12) . ?  
C16 C17 1.380(11) . ?  
C17 C18 1.386(10) . ?  
C18 C19 1.518(10) . ?  
C19 C20 1.522(10) . ?  
C21 C22 1.525(10) . ?  
C22 C23 1.522(9) . ?  
C24 C25 1.514(9) . ?  
C25 C26 1.530(9) . ?  
C27 C28 1.381(10) . ?  
C28 C29 1.378(11) . ?  
C29 C30 1.367(12) . ?  
C30 C31 1.396(10) . ?  
C31 C32 1.490(10) . ?  
C32 C33 1.543(10) . ?  
C34 C35 1.543(9) . ?  
C35 C36 1.527(9) . ?  
C37 C38 1.519(9) . ?



C38 C39 1.534(9) . ?  
C39 O12 1.254(8) 2\_566 ?  
O1S C2S 1.332(19) . ?  
O1S C3S 1.46(2) . ?  
O2S C2S 1.168(17) . ?  
C3S C4S 1.52(3) . ?  
C2S C1S 1.49(3) . ?

loop\_

\_geom\_angle\_atom\_site\_label\_1  
\_geom\_angle\_atom\_site\_label\_2  
\_geom\_angle\_atom\_site\_label\_3  
\_geom\_angle  
\_geom\_angle\_site\_symmetry\_1  
\_geom\_angle\_site\_symmetry\_3  
\_geom\_angle\_publ\_flag  
O1 NI1 O3 89.21(19) . . ?  
O1 NI1 N1 93.5(2) . . ?  
O3 NI1 N1 176.2(2) . . ?  
O1 NI1 O10 174.12(18) . . ?  
O3 NI1 O10 87.91(19) . . ?  
N1 NI1 O10 89.1(2) . . ?  
O1 NI1 O13 84.79(18) . . ?  
O3 NI1 O13 87.30(18) . . ?  
N1 NI1 O13 90.3(2) . . ?  
O10 NI1 O13 89.96(18) . . ?  
O1 NI1 N2 92.3(2) . . ?  
O3 NI1 N2 88.1(2) . . ?  
N1 NI1 N2 94.4(2) . . ?  
O10 NI1 N2 92.7(2) . . ?  
O13 NI1 N2 174.6(2) . . ?  
O7 NI2 O5 90.0(2) . . ?  
O7 NI2 N3 171.2(2) . . ?  
O5 NI2 N3 93.6(2) . . ?  
O7 NI2 N4 94.3(2) . . ?  
O5 NI2 N4 96.0(2) . . ?  
N3 NI2 N4 93.3(2) . . ?  
O7 NI2 O3 85.76(19) . . ?  
O5 NI2 O3 94.64(18) . . ?  
N3 NI2 O3 86.0(2) . . ?  
N4 NI2 O3 169.33(19) . . ?  
O7 NI2 O4 88.78(19) . . ?  
O5 NI2 O4 156.12(19) . . ?  
N3 NI2 O4 84.7(2) . . ?  
N4 NI2 O4 107.84(19) . . ?  
O3 NI2 O4 61.49(17) . . ?

O7 NI2 C13 87.9(2) . . ?  
O5 NI2 C13 125.8(2) . . ?  
N3 NI2 C13 83.5(2) . . ?  
N4 NI2 C13 138.1(2) . . ?  
O3 NI2 C13 31.20(18) . . ?  
O4 NI2 C13 30.32(19) . . ?  
O9 NI3 O8 90.48(18) . . ?  
O9 NI3 N5 101.2(2) . . ?  
O8 NI3 N5 167.3(2) . . ?  
O9 NI3 O11 171.86(19) . . ?  
O8 NI3 O11 81.60(18) . . ?  
N5 NI3 O11 86.6(2) . . ?  
O9 NI3 O6 90.12(19) . 2\_566 ?  
O8 NI3 O6 84.93(18) . 2\_566 ?  
N5 NI3 O6 90.1(2) . 2\_566 ?  
O11 NI3 O6 87.36(19) . 2\_566 ?  
O9 NI3 N6 91.9(2) . . ?  
O8 NI3 N6 93.4(2) . . ?  
N5 NI3 N6 91.1(2) . . ?  
O11 NI3 N6 90.5(2) . . ?  
O6 NI3 N6 177.4(2) 2\_566 . ?  
O2 NI4 O17 93.8(2) . . ?  
O2 NI4 O14 93.52(19) . . ?  
O17 NI4 O14 90.3(2) . . ?  
O2 NI4 O12 173.4(2) . . ?  
O17 NI4 O12 86.6(2) . . ?  
O14 NI4 O12 93.11(19) . . ?  
O2 NI4 O16 87.18(19) . . ?  
O17 NI4 O16 88.3(2) . . ?  
O14 NI4 O16 178.5(2) . . ?  
O12 NI4 O16 86.20(19) . . ?  
O2 NI4 O15 87.2(2) . . ?  
O17 NI4 O15 178.8(2) . . ?  
O14 NI4 O15 89.1(2) . . ?  
O12 NI4 O15 92.46(19) . . ?  
O16 NI4 O15 92.3(2) . . ?  
O19 CL1 O20 108.5(7) . . ?  
O19 CL1 O21 105.9(8) . . ?  
O20 CL1 O21 112.0(7) . . ?  
O19 CL1 O18 111.8(7) . . ?  
O20 CL1 O18 110.9(5) . . ?  
O21 CL1 O18 107.8(5) . . ?  
O22 CL2 O23 114.1(6) . . ?  
O22 CL2 O25 110.4(5) . . ?  
O23 CL2 O25 110.4(5) . . ?  
O22 CL2 O24 110.1(8) . . ?

O23 CL2 O24 105.5(5) .. ?  
O25 CL2 O24 105.9(5) .. ?  
C10 O1 NI1 131.4(4) .. ?  
C10 O2 NI4 129.8(4) .. ?  
C13 O3 NI1 125.6(4) .. ?  
C13 O3 NI2 89.9(4) .. ?  
NI1 O3 NI2 134.7(2) .. ?  
C13 O4 NI2 89.4(4) .. ?  
C26 O5 NI2 125.8(4) .. ?  
C26 O6 NI3 139.9(4) 2\_566 ?  
C23 O7 NI2 131.3(4) .. ?  
C23 O8 NI3 134.2(4) .. ?  
C36 O9 NI3 126.5(4) .. ?  
C36 O10 NI1 134.3(4) .. ?  
C39 O11 NI3 114.7(4) .. ?  
C39 O12 NI4 122.9(4) 2\_566 . ?  
C43 O16 NI4 121.7(4) .. ?  
C40 O17 NI4 125.1(5) .. ?  
C1 N1 C5 118.4(6) .. ?  
C1 N1 NI1 118.7(5) .. ?  
C5 N1 NI1 122.0(5) .. ?  
C11 N2 C8 108.6(5) .. ?  
C11 N2 C7 107.6(5) .. ?  
C8 N2 C7 110.7(5) .. ?  
C11 N2 NI1 109.0(4) .. ?  
C8 N2 NI1 109.7(4) .. ?  
C7 N2 NI1 111.1(4) .. ?  
C14 N3 C18 119.2(6) .. ?  
C14 N3 NI2 119.5(5) .. ?  
C18 N3 NI2 118.6(5) .. ?  
C21 N4 C24 110.2(5) .. ?  
C21 N4 C20 107.4(5) .. ?  
C24 N4 C20 109.0(5) .. ?  
C21 N4 NI2 107.2(4) .. ?  
C24 N4 NI2 110.2(4) .. ?  
C20 N4 NI2 112.7(4) .. ?  
C31 N5 C27 119.1(6) .. ?  
C31 N5 NI3 122.2(5) .. ?  
C27 N5 NI3 118.7(5) .. ?  
C34 N6 C33 109.9(5) .. ?  
C34 N6 C37 108.0(5) .. ?  
C33 N6 C37 107.6(5) .. ?  
C34 N6 NI3 106.5(4) .. ?  
C33 N6 NI3 115.0(4) .. ?  
C37 N6 NI3 109.7(4) .. ?  
C40 N7 C42 121.6(7) .. ?

C40 N7 C41 121.4(7) .. ?  
C42 N7 C41 116.9(7) .. ?  
N1 C1 C2 123.1(7) .. ?  
C3 C2 C1 117.4(8) .. ?  
C2 C3 C4 120.5(8) .. ?  
C5 C4 C3 119.1(7) .. ?  
N1 C5 C4 121.3(7) .. ?  
N1 C5 C6 116.7(6) .. ?  
C4 C5 C6 122.0(7) .. ?  
C7 C6 C5 111.9(6) .. ?  
N2 C7 C6 114.6(6) .. ?  
N2 C8 C9 116.2(6) .. ?  
C10 C9 C8 115.0(6) .. ?  
O1 C10 O2 124.7(6) .. ?  
O1 C10 C9 119.8(6) .. ?  
O2 C10 C9 115.5(6) .. ?  
N2 C11 C12 117.5(6) .. ?  
C13 C12 C11 118.2(6) .. ?  
O4 C13 O3 119.1(6) .. ?  
O4 C13 C12 120.1(6) .. ?  
O3 C13 C12 120.2(6) .. ?  
O4 C13 NI2 60.3(3) .. ?  
O3 C13 NI2 58.9(3) .. ?  
C12 C13 NI2 169.9(5) .. ?  
N3 C14 C15 122.4(7) .. ?  
C14 C15 C16 119.4(8) .. ?  
C17 C16 C15 118.1(7) .. ?  
C16 C17 C18 119.7(7) .. ?  
N3 C18 C17 121.2(7) .. ?  
N3 C18 C19 115.8(6) .. ?  
C17 C18 C19 123.0(7) .. ?  
C18 C19 C20 113.1(6) .. ?  
N4 C20 C19 112.8(6) .. ?  
N4 C21 C22 118.4(5) .. ?  
C23 C22 C21 118.5(6) .. ?  
O7 C23 O8 124.2(6) .. ?  
O7 C23 C22 121.2(6) .. ?  
O8 C23 C22 114.5(6) .. ?  
N4 C24 C25 114.2(6) .. ?  
C24 C25 C26 116.3(6) .. ?  
O6 C26 O5 120.6(6) .. ?  
O6 C26 C25 121.0(5) .. ?  
O5 C26 C25 118.3(6) .. ?  
N5 C27 C28 122.4(7) .. ?  
C29 C28 C27 118.6(7) .. ?  
C30 C29 C28 119.2(8) .. ?

C29 C30 C31 120.3(7) . . ?  
N5 C31 C30 120.4(7) . . ?  
N5 C31 C32 116.8(6) . . ?  
C30 C31 C32 122.8(7) . . ?  
C31 C32 C33 111.4(6) . . ?  
N6 C33 C32 116.3(6) . . ?  
N6 C34 C35 115.7(6) . . ?  
C36 C35 C34 116.6(5) . . ?  
O10 C36 O9 124.2(6) . . ?  
O10 C36 C35 115.5(6) . . ?  
O9 C36 C35 120.3(6) . . ?  
N6 C37 C38 116.8(5) . . ?  
C37 C38 C39 113.3(6) . . ?  
O12 C39 O11 123.9(6) 2\_566 . ?  
O12 C39 C38 118.6(6) 2\_566 . ?  
O11 C39 C38 117.5(6) . . ?  
O17 C40 N7 123.3(7) . . ?  
C2S O1S C3S 122.7(17) . . ?  
O1S C3S C4S 103(2) . . ?  
O2S C2S O1S 123(2) . . ?  
O2S C2S C1S 126.9(19) . . ?  
O1S C2S C1S 109.9(17) . . ?

loop\_

\_geom\_hbond\_atom\_site\_label\_D  
\_geom\_hbond\_atom\_site\_label\_H  
\_geom\_hbond\_atom\_site\_label\_A  
\_geom\_hbond\_distance\_DH  
\_geom\_hbond\_distance\_HA  
\_geom\_hbond\_distance\_DA  
\_geom\_hbond\_angle\_DHA  
\_geom\_hbond\_site\_symmetry\_A  
O13 H13A O5 0.84 1.92 2.755(7) 172.7 .  
O13 H13B O9 0.86 1.98 2.733(6) 146.8 .  
O14 H14B O1 0.87 1.91 2.674(6) 145.8 .  
O14 H14A O6 0.87 2.02 2.809(7) 150.7 .  
O15 H15B O11\_\$1 0.85 1.92 2.629(7) 139.5 2\_566  
O15 H15A O2S 0.84 2.08 2.798(12) 143.0 .  
O16 H16 O12\_\$2 0.85 2.01 2.863(7) 180.0 2\_576  
O3S H5S O20 0.84 1.96 2.779(17) 165.8 .

\_refine\_diff\_density\_max 1.733  
\_refine\_diff\_density\_min -1.335  
\_refine\_diff\_density\_rms 0.202

\_shelx\_res\_file

```

;
TITL 17SEPAM OLEX2: imported from CIF
shelx.res created by SHELXL-2016/4 at 12:53:45 on 26-Jul-2016
CELL 0.71069 13.5360 15.6270 15.8480 102.096 106.057 103.057
ZERR 1.00 0.0050 0.0050 0.0050 0.005 0.005 0.005
LATT 1
SFAC C H CL N NI O
DISP C 0.003 0.002
DISP Cl 0.148 0.159
DISP H 0 0
DISP N 0.006 0.003
DISP Ni 0.339 1.112
DISP O 0.011 0.006
UNIT 96 154 4 14 8 56
MERG 2
EQIV $1 -X,1-Y,1-Z
EQIV $2 -X,2-Y,1-Z
RIGU
HTAB O13 O5
HTAB O13 O9
HTAB O14 O1
HTAB O14 O6
HTAB O15 O11_$1
HTAB O15 O2S
HTAB O16 O12_$2
HTAB O3S O20
DFIX 1.450 0.020 O3S C5S
FMAP 2 53 53
PLAN 20
SIZE 0.100 0.200 0.500
ACTA
L.S. 4
TEMP 0.00
WGHT 0.136100 7.993200
FVAR 0.29808
NI1 5 0.274409 0.630465 0.397871 11.00000 0.01780 0.02710 =
0.02422 0.00876 0.00885 0.00672
NI2 5 0.286236 0.550646 0.613489 11.00000 0.01790 0.02820 =
0.02150 0.00875 0.00786 0.00797
NI3 5 0.041295 0.278227 0.293713 11.00000 0.01882 0.02619 =
0.02213 0.00704 0.00900 0.00728
NI4 5 0.116800 0.889834 0.526743 11.00000 0.02084 0.02807 =
0.02842 0.01116 0.01104 0.00894
CL1 3 0.335541 0.948518 0.247780 11.00000 0.04140 0.04947 =
0.04378 0.02112 0.01396 0.00884
CL2 3 0.263343 0.374110 -0.020636 11.00000 0.04106 0.06070 =

```

|      |   |           |          |          |          |          |           |
|------|---|-----------|----------|----------|----------|----------|-----------|
|      |   | 0.04691   | 0.02771  | 0.00649  | 0.00816  |          |           |
| O1   | 6 | 0.247464  | 0.745669 | 0.461234 | 11.00000 | 0.02127  | 0.02266 = |
|      |   | 0.02932   | 0.00463  | 0.01696  | 0.00694  |          |           |
| O2   | 6 | 0.245478  | 0.890321 | 0.484519 | 11.00000 | 0.02014  | 0.02894 = |
|      |   | 0.04064   | 0.01143  | 0.01757  | 0.00902  |          |           |
| O3   | 6 | 0.344315  | 0.615048 | 0.523872 | 11.00000 | 0.01769  | 0.03160 = |
|      |   | 0.02392   | 0.00986  | 0.01056  | 0.01097  |          |           |
| O4   | 6 | 0.439835  | 0.544488 | 0.602836 | 11.00000 | 0.02190  | 0.04188 = |
|      |   | 0.02617   | 0.01627  | 0.01451  | 0.01821  |          |           |
| O5   | 6 | 0.149359  | 0.586384 | 0.586576 | 11.00000 | 0.01807  | 0.03566 = |
|      |   | 0.02247   | 0.00671  | 0.00549  | 0.00677  |          |           |
| O6   | 6 | 0.044194  | 0.656822 | 0.635187 | 11.00000 | 0.02336  | 0.03600 = |
|      |   | 0.02794   | 0.01202  | 0.01593  | 0.01528  |          |           |
| O7   | 6 | 0.214458  | 0.439102 | 0.504163 | 11.00000 | 0.02492  | 0.02276 = |
|      |   | 0.02446   | 0.00469  | 0.00849  | 0.00581  |          |           |
| O8   | 6 | 0.145610  | 0.292742 | 0.424068 | 11.00000 | 0.01872  | 0.02950 = |
|      |   | 0.01670   | 0.00647  | 0.00553  | 0.00914  |          |           |
| O9   | 6 | 0.131306  | 0.403537 | 0.294896 | 11.00000 | 0.02205  | 0.02357 = |
|      |   | 0.02726   | 0.00870  | 0.00963  | 0.00312  |          |           |
| O10  | 6 | 0.292016  | 0.505980 | 0.339533 | 11.00000 | 0.02198  | 0.02648 = |
|      |   | 0.02747   | 0.00423  | 0.01011  | 0.00417  |          |           |
| O11  | 6 | -0.038230 | 0.155690 | 0.312481 | 11.00000 | 0.02342  | 0.02190 = |
|      |   | 0.02939   | 0.00857  | 0.00818  | 0.00417  |          |           |
| O12  | 6 | -0.008998 | 0.905827 | 0.573476 | 11.00000 | 0.02321  | 0.03329 = |
|      |   | 0.03432   | 0.01487  | 0.01642  | 0.01109  |          |           |
| O13  | 6 | 0.125035  | 0.561510 | 0.403824 | 11.00000 | 0.01646  | 0.02581 = |
|      |   | 0.02463   | 0.00501  | 0.00996  | 0.00392  |          |           |
| AFIX | 3 |           |          |          |          |          |           |
| H13A | 2 | 0.128255  | 0.571490 | 0.458884 | 11.00000 | -1.50000 |           |
| H13B | 2 | 0.110155  | 0.503420 | 0.380904 | 11.00000 | -1.50000 |           |
| AFIX | 0 |           |          |          |          |          |           |
| O14  | 6 | 0.071686  | 0.750005 | 0.505838 | 11.00000 | 0.02876  | 0.02457 = |
|      |   | 0.03096   | 0.00968  | 0.01125  | 0.00896  |          |           |
| AFIX | 3 |           |          |          |          |          |           |
| H14A | 2 | 0.081926  | 0.738575 | 0.558478 | 11.00000 | -1.50000 |           |
| H14B | 2 | 0.110716  | 0.726424 | 0.478068 | 11.00000 | -1.50000 |           |
| AFIX | 0 |           |          |          |          |          |           |
| O15  | 6 | 0.219428  | 0.906394 | 0.658364 | 11.00000 | 0.02284  | 0.04805 = |
|      |   | 0.02256   | 0.01477  | 0.00705  | 0.00995  |          |           |
| AFIX | 3 |           |          |          |          |          |           |
| H15A | 2 | 0.270078  | 0.955214 | 0.675613 | 11.00000 | -1.50000 |           |
| H15B | 2 | 0.184738  | 0.890624 | 0.692692 | 11.00000 | -1.50000 |           |
| AFIX | 0 |           |          |          |          |          |           |
| O16  | 6 | 0.158604  | 1.030962 | 0.545312 | 11.00000 | 0.02662  | 0.02956 = |
|      |   | 0.03591   | 0.01447  | 0.01186  | 0.01315  |          |           |
| AFIX | 3 |           |          |          |          |          |           |

|          |   |           |          |           |          |          |           |
|----------|---|-----------|----------|-----------|----------|----------|-----------|
| H16      | 2 | 0.114204  | 1.049741 | 0.510042  | 11.00000 | -1.50000 |           |
| AFIX 0   |   |           |          |           |          |          |           |
| O17      | 6 | 0.014121  | 0.872282 | 0.398950  | 11.00000 | 0.02520  | 0.03977 = |
|          |   | 0.01861   | 0.00915  | 0.00827   | 0.00914  |          |           |
| O18      | 6 | 0.272577  | 0.858151 | 0.235678  | 11.00000 | 0.05992  | 0.07100 = |
|          |   | 0.09676   | 0.05537  | -0.01003  | -0.01134 |          |           |
| O19      | 6 | 0.321823  | 1.011973 | 0.314401  | 11.00000 | 0.19374  | 0.12113 = |
|          |   | 0.09288   | 0.04074  | 0.08583   | 0.09141  |          |           |
| O20      | 6 | 0.308952  | 0.972108 | 0.166866  | 11.00000 | 0.18662  | 0.05957 = |
|          |   | 0.05080   | 0.03002  | -0.00006  | -0.02163 |          |           |
| O21      | 6 | 0.444085  | 0.952501 | 0.279756  | 11.00000 | 0.05121  | 0.10361 = |
|          |   | 0.20885   | 0.09255  | 0.05957   | 0.02571  |          |           |
| O22      | 6 | 0.363174  | 0.441438 | 0.011278  | 11.00000 | 0.06403  | 0.15032 = |
|          |   | 0.12031   | 0.08503  | -0.02991  | -0.03648 |          |           |
| O23      | 6 | 0.266250  | 0.293556 | 0.006303  | 11.00000 | 0.07481  | 0.09673 = |
|          |   | 0.07349   | 0.05735  | 0.02719   | 0.03662  |          |           |
| O24      | 6 | 0.188421  | 0.408624 | 0.015698  | 11.00000 | 0.11300  | 0.11983 = |
|          |   | 0.06693   | 0.02571  | 0.04054   | 0.06300  |          |           |
| O25      | 6 | 0.217318  | 0.351780 | -0.117985 | 11.00000 | 0.05748  | 0.07265 = |
|          |   | 0.04797   | 0.03296  | 0.01815   | 0.01802  |          |           |
| C5S      | 1 | 0.175049  | 1.020588 | -0.024944 | 11.00000 | 0.14898  | 0.07983 = |
|          |   | 0.05558   | 0.01049  | -0.00856  | 0.03817  |          |           |
| AFIX 137 |   |           |          |           |          |          |           |
| H3SA     | 2 | 0.187725  | 0.972112 | -0.064872 | 11.00000 | -1.50000 |           |
| H3SB     | 2 | 0.241970  | 1.068070 | 0.009387  | 11.00000 | -1.50000 |           |
| H3SC     | 2 | 0.125641  | 1.045443 | -0.060862 | 11.00000 | -1.50000 |           |
| AFIX 0   |   |           |          |           |          |          |           |
| N1       | 4 | 0.198872  | 0.636690 | 0.268371  | 11.00000 | 0.02133  | 0.03698 = |
|          |   | 0.02458   | 0.01125  | 0.00891   | 0.00963  |          |           |
| N2       | 4 | 0.429669  | 0.704802 | 0.405407  | 11.00000 | 0.01260  | 0.02681 = |
|          |   | 0.02781   | 0.00526  | 0.00778   | 0.00301  |          |           |
| N3       | 4 | 0.375165  | 0.672405 | 0.715200  | 11.00000 | 0.02264  | 0.02826 = |
|          |   | 0.02286   | 0.00669  | 0.00590   | 0.00310  |          |           |
| N4       | 4 | 0.255930  | 0.481307 | 0.705727  | 11.00000 | 0.01602  | 0.03309 = |
|          |   | 0.02585   | 0.01572  | 0.00673   | 0.01142  |          |           |
| N5       | 4 | -0.087481 | 0.243607 | 0.170848  | 11.00000 | 0.01847  | 0.02924 = |
|          |   | 0.02077   | 0.00374  | 0.00039   | 0.01082  |          |           |
| N6       | 4 | 0.127782  | 0.208376 | 0.225385  | 11.00000 | 0.02261  | 0.02449 = |
|          |   | 0.02367   | 0.00249  | 0.01069   | 0.00744  |          |           |
| N7       | 4 | -0.025567 | 0.861356 | 0.249744  | 11.00000 | 0.03357  | 0.03810 = |
|          |   | 0.02375   | 0.00506  | 0.00834   | 0.01218  |          |           |
| C1       | 1 | 0.095512  | 0.635124 | 0.244702  | 11.00000 | 0.02318  | 0.04094 = |
|          |   | 0.03411   | 0.01728  | 0.00624   | 0.00980  |          |           |
| AFIX 43  |   |           |          |           |          |          |           |
| H1       | 2 | 0.065392  | 0.644541 | 0.290663  | 11.00000 | -1.20000 |           |
| AFIX 0   |   |           |          |           |          |          |           |



C2 1 0.030393 0.619943 0.153796 11.00000 0.02843 0.04634 =  
0.04062 0.02197 0.00387 0.00557  
AFIX 43  
H2 2 -0.041282 0.619228 0.139282 11.00000 -1.20000  
AFIX 0  
C3 1 0.076137 0.606306 0.087692 11.00000 0.03787 0.05250 =  
0.03115 0.01963 0.00342 0.00271  
AFIX 43  
H3 2 0.034769 0.594292 0.026505 11.00000 -1.20000  
AFIX 0  
C4 1 0.183963 0.610184 0.110843 11.00000 0.04990 0.04611 =  
0.02334 0.01001 0.01507 0.01359  
AFIX 43  
H4 2 0.215371 0.601529 0.065686 11.00000 -1.20000  
AFIX 0  
C5 1 0.244086 0.627081 0.201922 11.00000 0.02939 0.03176 =  
0.02527 0.01107 0.01203 0.00645  
C6 1 0.364111 0.636544 0.232918 11.00000 0.03599 0.04881 =  
0.03479 0.01113 0.01658 0.01712  
AFIX 23  
H6A 2 0.374663 0.581633 0.248379 11.00000 -1.20000  
H6B 2 0.390649 0.641958 0.182745 11.00000 -1.20000  
AFIX 0  
C7 1 0.428598 0.719878 0.315682 11.00000 0.03029 0.03396 =  
0.03977 0.01966 0.01673 0.00611  
AFIX 23  
H7A 2 0.502377 0.738633 0.316646 11.00000 -1.20000  
H7B 2 0.399010 0.769981 0.308366 11.00000 -1.20000  
AFIX 0  
C8 1 0.468819 0.793758 0.478407 11.00000 0.01862 0.02549 =  
0.03480 0.01170 0.01029 0.00081  
AFIX 23  
H8A 2 0.541946 0.824543 0.483632 11.00000 -1.20000  
H8B 2 0.471760 0.781061 0.536250 11.00000 -1.20000  
AFIX 0  
C9 1 0.401981 0.859990 0.464794 11.00000 0.01593 0.03356 =  
0.04320 0.01517 0.02000 0.00681  
AFIX 23  
H9A 2 0.441389 0.918760 0.510672 11.00000 -1.20000  
H9B 2 0.394547 0.869478 0.405068 11.00000 -1.20000  
AFIX 0  
C10 1 0.289675 0.828420 0.471021 11.00000 0.01550 0.03213 =  
0.02666 0.00969 0.00987 0.00747  
C11 1 0.504793 0.651170 0.428904 11.00000 0.01241 0.03728 =  
0.02842 0.00780 0.00844 0.00748  
AFIX 23

|      |    |          |          |          |          |          |           |
|------|----|----------|----------|----------|----------|----------|-----------|
| H11A | 2  | 0.573328 | 0.682897 | 0.425462 | 11.00000 | -1.20000 |           |
| H11B | 2  | 0.477002 | 0.592327 | 0.382090 | 11.00000 | -1.20000 |           |
| AFIX | 0  |          |          |          |          |          |           |
| C12  | 1  | 0.526453 | 0.632992 | 0.522487 | 11.00000 | 0.01923  | 0.03818 = |
|      |    | 0.03258  | 0.01034  | 0.01521  | 0.00660  |          |           |
| AFIX | 23 |          |          |          |          |          |           |
| H12A | 2  | 0.570937 | 0.592219 | 0.525213 | 11.00000 | -1.20000 |           |
| H12B | 2  | 0.568837 | 0.690721 | 0.569083 | 11.00000 | -1.20000 |           |
| AFIX | 0  |          |          |          |          |          |           |
| C13  | 1  | 0.430984 | 0.592251 | 0.548472 | 11.00000 | 0.01343  | 0.03032 = |
|      |    | 0.01936  | 0.00559  | 0.00073  | 0.00254  |          |           |
| C14  | 1  | 0.375910 | 0.751671 | 0.696955 | 11.00000 | 0.03232  | 0.03027 = |
|      |    | 0.02975  | 0.01119  | 0.00720  | 0.01113  |          |           |
| AFIX | 43 |          |          |          |          |          |           |
| H14  | 2  | 0.320872 | 0.752510 | 0.646975 | 11.00000 | -1.20000 |           |
| AFIX | 0  |          |          |          |          |          |           |
| C15  | 1  | 0.455055 | 0.832485 | 0.749252 | 11.00000 | 0.03777  | 0.03571 = |
|      |    | 0.03865  | 0.01047  | 0.01360  | 0.00452  |          |           |
| AFIX | 43 |          |          |          |          |          |           |
| H15  | 2  | 0.453112 | 0.886938 | 0.734862 | 11.00000 | -1.20000 |           |
| AFIX | 0  |          |          |          |          |          |           |
| C16  | 1  | 0.537551 | 0.832061 | 0.823423 | 11.00000 | 0.03389  | 0.03344 = |
|      |    | 0.03773  | -0.00164 | 0.00763  | 0.00086  |          |           |
| AFIX | 43 |          |          |          |          |          |           |
| H16A | 2  | 0.593254 | 0.885498 | 0.858674 | 11.00000 | -1.20000 |           |
| AFIX | 0  |          |          |          |          |          |           |
| C17  | 1  | 0.534913 | 0.750075 | 0.843689 | 11.00000 | 0.01752  | 0.04284 = |
|      |    | 0.03394  | 0.00593  | 0.00651  | 0.00694  |          |           |
| AFIX | 43 |          |          |          |          |          |           |
| H17  | 2  | 0.587671 | 0.748050 | 0.894639 | 11.00000 | -1.20000 |           |
| AFIX | 0  |          |          |          |          |          |           |
| C18  | 1  | 0.453313 | 0.670755 | 0.787802 | 11.00000 | 0.02352  | 0.03873 = |
|      |    | 0.02293  | 0.00516  | 0.00923  | 0.00679  |          |           |
| C19  | 1  | 0.445160 | 0.577756 | 0.804847 | 11.00000 | 0.02030  | 0.04163 = |
|      |    | 0.03310  | 0.01474  | 0.00549  | 0.01031  |          |           |
| AFIX | 23 |          |          |          |          |          |           |
| H19A | 2  | 0.496823 | 0.586088 | 0.864484 | 11.00000 | -1.20000 |           |
| H19B | 2  | 0.464260 | 0.539751 | 0.758954 | 11.00000 | -1.20000 |           |
| AFIX | 0  |          |          |          |          |          |           |
| C20  | 1  | 0.333094 | 0.528102 | 0.801753 | 11.00000 | 0.02046  | 0.03770 = |
|      |    | 0.02759  | 0.01174  | 0.00668  | 0.01135  |          |           |
| AFIX | 23 |          |          |          |          |          |           |
| H20A | 2  | 0.338544 | 0.482721 | 0.834816 | 11.00000 | -1.20000 |           |
| H20B | 2  | 0.304721 | 0.572003 | 0.832698 | 11.00000 | -1.20000 |           |
| AFIX | 0  |          |          |          |          |          |           |
| C21  | 1  | 0.270281 | 0.389301 | 0.676215 | 11.00000 | 0.02414  | 0.02983 = |

0.02527 0.01374 0.01124 0.00692  
 AFIX 23  
 H21A 2 0.263881 0.358881 0.722746 11.00000 -1.20000  
 H21B 2 0.343482 0.398759 0.675863 11.00000 -1.20000  
 AFIX 0  
 C22 1 0.194513 0.323455 0.583453 11.00000 0.02617 0.02992 =  
 0.02258 0.01114 0.00969 0.01148  
 AFIX 23  
 H22A 2 0.216735 0.268400 0.574040 11.00000 -1.20000  
 H22B 2 0.122837 0.305814 0.587379 11.00000 -1.20000  
 AFIX 0  
 C23 1 0.185661 0.355882 0.498288 11.00000 0.01427 0.02391 =  
 0.02108 -0.00064 0.00909 0.00657  
 C24 1 0.142942 0.471112 0.705535 11.00000 0.02085 0.03191 =  
 0.02862 0.01391 0.01323 0.00539  
 AFIX 23  
 H24A 2 0.132511 0.442870 0.752664 11.00000 -1.20000  
 H24B 2 0.093009 0.429914 0.646855 11.00000 -1.20000  
 AFIX 0  
 C25 1 0.115639 0.560548 0.721932 11.00000 0.02584 0.02701 =  
 0.02082 0.00660 0.00415 0.00835  
 AFIX 23  
 H25A 2 0.172757 0.604782 0.775184 11.00000 -1.20000  
 H25B 2 0.049951 0.550207 0.736907 11.00000 -1.20000  
 AFIX 0  
 C26 1 0.100096 0.603276 0.642604 11.00000 0.00814 0.03153 =  
 0.01892 0.00545 0.00811 0.00588  
 C27 1 -0.189124 0.219474 0.172364 11.00000 0.01982 0.04031 =  
 0.03122 0.00846 0.00684 0.01107  
 AFIX 43  
 H27 2 -0.199318 0.217105 0.227604 11.00000 -1.20000  
 AFIX 0  
 C28 1 -0.278509 0.198179 0.094863 11.00000 0.02567 0.04984 =  
 0.03350 0.01438 0.00667 0.01187  
 AFIX 43  
 H28 2 -0.347634 0.183301 0.098053 11.00000 -1.20000  
 AFIX 0  
 C29 1 -0.263037 0.199458 0.012689 11.00000 0.03294 0.06458 =  
 0.03009 0.01157 0.00571 0.01101  
 AFIX 43  
 H29 2 -0.321715 0.185894 -0.040494 11.00000 -1.20000  
 AFIX 0  
 C30 1 -0.160381 0.220909 0.010361 11.00000 0.04017 0.05526 =  
 0.02479 0.01281 0.01130 0.01377  
 AFIX 43  
 H30 2 -0.149143 0.220656 -0.044978 11.00000 -1.20000

AFIX 0

C31 1 -0.072313 0.243196 0.090628 11.00000 0.02929 0.02892 =  
0.02412 0.00848 0.01062 0.00716

C32 1 0.041387 0.267272 0.092388 11.00000 0.03178 0.03221 =  
0.02136 0.00755 0.01012 0.00969

AFIX 23

H32A 2 0.080249 0.328985 0.132627 11.00000 -1.20000

H32B 2 0.042250 0.266317 0.031202 11.00000 -1.20000

AFIX 0

C33 1 0.098567 0.199604 0.126130 11.00000 0.02683 0.03073 =  
0.02090 0.00212 0.00781 0.00651

AFIX 23

H33A 2 0.052084 0.137636 0.092433 11.00000 -1.20000

H33B 2 0.163894 0.207400 0.110645 11.00000 -1.20000

AFIX 0

C34 1 0.242415 0.259228 0.272482 11.00000 0.01424 0.02966 =  
0.02851 0.00500 0.01128 0.00708

AFIX 23

H34A 2 0.284456 0.223414 0.249654 11.00000 -1.20000

H34B 2 0.259433 0.264654 0.337356 11.00000 -1.20000

AFIX 0

C35 1 0.278571 0.356173 0.261915 11.00000 0.03077 0.02605 =  
0.02682 0.00929 0.01437 0.00680

AFIX 23

H35A 2 0.356405 0.380113 0.290045 11.00000 -1.20000

H35B 2 0.261266 0.350518 0.196979 11.00000 -1.20000

AFIX 0

C36 1 0.229869 0.426644 0.302833 11.00000 0.02046 0.02870 =  
0.01285 0.00426 0.00882 0.00921

C37 1 0.110188 0.113380 0.235705 11.00000 0.02368 0.02179 =  
0.02816 0.00331 0.01540 0.00402

AFIX 23

H37A 2 0.162278 0.088055 0.216488 11.00000 -1.20000

H37B 2 0.039083 0.075749 0.193722 11.00000 -1.20000

AFIX 0

C38 1 0.118687 0.104310 0.330857 11.00000 0.02493 0.02930 =  
0.03026 0.00685 0.01437 0.01209

AFIX 23

H38A 2 0.184953 0.148452 0.375005 11.00000 -1.20000

H38B 2 0.122830 0.043426 0.332223 11.00000 -1.20000

AFIX 0

C39 1 0.023445 0.119839 0.359828 11.00000 0.02186 0.02157 =  
0.02865 0.00683 0.01411 0.00539

C40 1 0.037647 0.860759 0.328295 11.00000 0.03511 0.02622 =  
0.03243 0.00938 0.01037 0.00753

AFIX 43

H40 2 0.103730 0.851181 0.331266 11.00000 -1.20000  
AFIX 0  
C41 1 0.004746 0.845514 0.167053 11.00000 0.05860 0.05715 =  
0.02679 0.01246 0.02158 0.01678  
AFIX 137  
H41A 2 0.074357 0.835924 0.181816 11.00000 -1.50000  
H41B 2 0.007362 0.898005 0.144326 11.00000 -1.50000  
H41C 2 -0.047655 0.792251 0.120934 11.00000 -1.50000  
AFIX 0  
C42 1 -0.128428 0.877268 0.239987 11.00000 0.04646 0.06544 =  
0.04493 0.01603 0.01768 0.02892  
AFIX 137  
H42A 2 -0.142509 0.880856 0.296560 11.00000 -1.50000  
H42B 2 -0.184095 0.827661 0.191796 11.00000 -1.50000  
H42C 2 -0.127185 0.933886 0.225108 11.00000 -1.50000  
AFIX 0  
C43 1 0.265093 1.083045 0.553561 11.00000 0.03797 0.03231 =  
0.06926 0.02728 0.02388 0.00753  
AFIX 137  
H43A 2 0.271749 1.074172 0.493818 11.00000 -1.50000  
H43B 2 0.317889 1.062623 0.591618 11.00000 -1.50000  
H43C 2 0.276553 1.147021 0.580741 11.00000 -1.50000  
AFIX 0  
O3S 6 0.128513 0.983805 0.039053 11.00000 0.13981 0.11402 =  
0.15041 0.03142 0.05107 0.04099  
AFIX 3  
H5S 2 0.176743 0.980585 0.083813 11.00000 -1.50000  
AFIX 0  
O1S 6 0.462221 1.180926 0.909077 11.00000 0.11598 0.12642 =  
0.13890 -0.03044 0.02628 0.00412  
O2S 6 0.349330 1.077254 0.781579 11.00000 0.10937 0.10705 =  
0.08467 0.00158 -0.01354 -0.01399  
C3S 1 0.450828 1.260993 0.878365 11.00000 0.16235 0.08662 =  
0.22152 -0.00080 0.14788 0.00267  
AFIX 23  
H0AA 2 0.379833 1.267764 0.871828 11.00000 -1.20000  
H0AB 2 0.462929 1.256850 0.820304 11.00000 -1.20000  
AFIX 0  
C4S 1 0.538070 1.340141 0.955042 11.00000 0.18647 0.14146 =  
0.10809 0.02076 0.09956 0.03939  
AFIX 137  
H4SA 2 0.518525 1.348663 1.009324 11.00000 -1.50000  
H4SB 2 0.545330 1.395267 0.936521 11.00000 -1.50000  
H4SC 2 0.605374 1.326405 0.967636 11.00000 -1.50000  
AFIX 0  
C2S 1 0.406447 1.095277 0.857311 11.00000 0.07695 0.11180 =

0.07389 -0.01411 0.01513 0.00740  
C1S 1 0.430734 1.029191 0.909961 11.00000 0.22228 0.20408 =  
0.21336 0.10079 0.05052 0.08740

AFIX 137

HISA 2 0.402319 1.036438 0.959318 11.00000 -1.50000

HISB 2 0.507387 1.041101 0.934487 11.00000 -1.50000

HISC 2 0.398097 0.967586 0.869898 11.00000 -1.50000

AFIX 0

HKLF 4

REM 17SEPAM OLEX2: imported from CIF

REM R1 = 0.0814 for 8925 Fo > 4sig(Fo) and 0.1320 for all 14286 data

REM 808 parameters refined using 820 restraints

END

WGHT 0.1362 8.0422

REM Highest difference peak 1.733, deepest hole -1.335, 1-sigma level 0.202

Q1 1 0.2474 0.4806 0.5552 11.00000 0.05 1.46  
Q2 1 0.3214 0.6205 0.6643 11.00000 0.05 1.42  
Q3 1 0.2837 0.9784 0.7205 11.00000 0.05 1.34  
Q4 1 0.0986 0.8177 0.4773 11.00000 0.05 1.04  
Q5 1 0.1444 0.9601 0.5715 11.00000 0.05 1.03  
Q6 1 0.3259 0.5173 0.5581 11.00000 0.05 1.01  
Q7 1 0.1774 0.9788 0.5549 11.00000 0.05 0.99  
Q8 1 -0.0222 0.2972 0.2408 11.00000 0.05 0.99  
Q9 1 0.2354 0.5750 0.3592 11.00000 0.05 0.97  
Q10 1 0.4053 0.5428 0.7031 11.00000 0.05 0.97  
Q11 1 0.2633 0.7037 0.4022 11.00000 0.05 0.96  
Q12 1 0.2909 0.5661 0.5560 11.00000 0.05 0.94  
Q13 1 0.2979 0.4363 0.0403 11.00000 0.05 0.89  
Q14 1 0.2380 0.6609 0.4578 11.00000 0.05 0.88  
Q15 1 0.0818 0.3451 0.3410 11.00000 0.05 0.87  
Q16 1 0.3688 0.5624 0.5849 11.00000 0.05 0.86  
Q17 1 0.1791 0.6398 0.3768 11.00000 0.05 0.86  
Q18 1 0.3203 1.0206 0.2598 11.00000 0.05 0.86  
Q19 1 0.3521 0.6269 0.4608 11.00000 0.05 0.84  
Q20 1 0.3794 1.0045 0.3234 11.00000 0.05 0.83

;

\_shelx\_res\_checksum 8065

\_shelx\_hkl\_file

;  
-2 0 0 1250.41 38.04 2  
-3 0 0 22.20 3.20 2  
-4 0 0 940.57 32.09 2  
-5 0 0 1346.69 45.34 2  
5 0 0 1373.44 39.56 1  
-6 0 0 472.85 21.00 2  
-7 0 0 1402.83 49.10 2  
-8 0 0 213.94 14.33 2  
-9 0 0 29.99 7.26 2  
-10 0 0 173.35 14.13 2  
-11 0 0 107.99 13.31 2  
-12 0 0 486.82 28.14 2  
-13 0 0 552.64 31.59 2  
-14 0 0 5.67 6.69 2  
-15 0 0 10.60 7.12 2  
-16 0 0 1.68 6.60 3  
-16 1 0 -0.82 6.36 3  
-15 1 0 6.06 6.55 2  
-14 1 0 210.35 18.93 2  
-13 1 0 73.84 13.05 2  
-12 1 0 5.07 4.62 2  
-11 1 0 101.71 13.03 2  
-10 1 0 127.69 13.29 2  
-9 1 0 1425.97 52.73 2  
-8 1 0 112.23 10.20 2  
-7 1 0 89.91 9.12 2  
-6 1 0 1212.20 42.35 2  
-5 1 0 95.21 7.48 2  
-4 1 0 1461.49 46.72 2  
-3 1 0 19.20 2.98 2  
-2 1 0 4411.42 126.18 2  
2 1 0 369.26 12.27 1  
3 1 0 228.05 8.85 1  
-3 -1 0 233.62 10.83 2  
4 1 0 139.58 6.63 1  
-4 -1 0 144.72 9.03 2  
5 1 0 215.22 9.24 1  
-5 -1 0 218.05 12.24 2  
-6 -1 0 2.54 2.13 1  
-6 -1 0 2.12 1.69 4  
-6 -1 0 3.06 2.68 2  
-7 -1 0 428.90 16.11 1  
-7 -1 0 439.23 15.85 4  
-7 -1 0 433.54 21.23 2  
-8 -1 0 2.73 3.33 2

-9 -1 0 114.40 12.39 2  
-10 -1 0 28.70 6.90 2  
-11 -1 0 149.68 15.77 2  
-12 -1 0 250.07 19.19 2  
-13 -1 0 -1.03 4.32 2  
-14 -1 0 94.61 15.88 2  
-16 2 0 -0.86 6.66 3  
-15 2 0 128.66 18.06 2  
-15 2 0 102.50 17.19 3  
-14 2 0 294.47 22.90 2  
-13 2 0 17.86 6.91 2  
-12 2 0 97.95 13.20 2  
-11 2 0 9.15 4.14 2  
-10 2 0 3.97 3.70 2  
-9 2 0 33.55 7.04 2  
-8 2 0 200.77 13.64 2  
-7 2 0 686.48 28.32 2  
-6 2 0 4.98 2.87 2  
-5 2 0 470.83 19.83 2  
-4 2 0 272.50 12.95 2  
-3 2 0 1506.93 46.88 2  
2 -2 0 5257.66 147.44 1  
-2 2 0 5394.49 152.13 2  
1 -2 0 729.92 21.72 4  
-1 2 0 713.79 22.77 2  
1 -2 0 697.53 21.78 1  
0 2 0 39.17 3.19 2  
1 2 0 202.57 8.39 1  
3 2 0 266.56 10.95 1  
4 2 0 747.33 24.89 1  
-4 -2 0 738.82 27.99 2  
-5 -2 0 171.06 11.18 2  
-6 -2 0 703.17 24.28 4  
-6 -2 0 718.05 29.73 2  
-6 -2 0 706.57 24.60 1  
-7 -2 0 129.84 7.89 4  
-7 -2 0 131.45 11.04 2  
-7 -2 0 142.81 8.75 1  
-8 -2 0 6.42 4.04 2  
-9 -2 0 313.86 19.76 2  
-10 -2 0 482.52 26.70 2  
-11 -2 0 28.97 7.71 2  
-12 -2 0 16.89 7.38 2  
-13 -2 0 25.16 8.42 2  
-14 -2 0 27.61 9.23 2  
-17 3 0 -1.93 5.69 3



|     |    |   |         |       |   |
|-----|----|---|---------|-------|---|
| -16 | 3  | 0 | 26.10   | 10.39 | 3 |
| -15 | 3  | 0 | 20.50   | 8.98  | 2 |
| -15 | 3  | 0 | 4.09    | 6.94  | 3 |
| -14 | 3  | 0 | 40.02   | 10.06 | 2 |
| -14 | 3  | 0 | 48.85   | 12.60 | 3 |
| -13 | 3  | 0 | 0.04    | 4.05  | 2 |
| -13 | 3  | 0 | 3.00    | 5.72  | 3 |
| -12 | 3  | 0 | 2.63    | 4.84  | 2 |
| -11 | 3  | 0 | 106.30  | 13.26 | 2 |
| -10 | 3  | 0 | 636.92  | 30.71 | 2 |
| -9  | 3  | 0 | 539.65  | 26.56 | 2 |
| -8  | 3  | 0 | 493.92  | 24.13 | 2 |
| -7  | 3  | 0 | 762.15  | 31.17 | 2 |
| -6  | 3  | 0 | 501.72  | 22.08 | 2 |
| 5   | -3 | 0 | 11.52   | 1.86  | 1 |
| -5  | 3  | 0 | 5.71    | 2.81  | 2 |
| -4  | 3  | 0 | 488.50  | 18.59 | 3 |
| 4   | -3 | 0 | 495.69  | 15.79 | 1 |
| -4  | 3  | 0 | 453.39  | 19.20 | 2 |
| 3   | -3 | 0 | 309.77  | 11.07 | 1 |
| -3  | 3  | 0 | 295.23  | 13.13 | 2 |
| -2  | 3  | 0 | 387.71  | 13.89 | 3 |
| -2  | 3  | 0 | 435.93  | 15.96 | 2 |
| 1   | -3 | 0 | 2188.91 | 62.87 | 1 |
| 1   | -3 | 0 | 2157.06 | 62.26 | 4 |
| -1  | 3  | 0 | 2158.30 | 64.72 | 2 |
| 0   | -3 | 0 | 344.37  | 12.66 | 4 |
| 0   | -3 | 0 | 308.69  | 12.48 | 1 |
| 0   | 3  | 0 | 316.68  | 13.18 | 2 |
| 1   | 3  | 0 | 63.04   | 4.95  | 1 |
| 2   | 3  | 0 | 149.73  | 8.14  | 1 |
| -5  | -3 | 0 | 451.77  | 21.38 | 2 |
| -5  | -3 | 0 | 471.00  | 18.49 | 1 |
| -5  | -3 | 0 | 444.11  | 17.88 | 4 |
| -6  | -3 | 0 | 310.88  | 14.62 | 1 |
| -6  | -3 | 0 | 306.11  | 17.48 | 2 |
| -6  | -3 | 0 | 323.98  | 14.37 | 4 |
| -7  | -3 | 0 | 22.04   | 4.49  | 1 |
| -7  | -3 | 0 | 19.95   | 5.93  | 2 |
| -7  | -3 | 0 | 26.66   | 4.23  | 4 |
| -8  | -3 | 0 | 3.28    | 3.90  | 2 |
| -9  | -3 | 0 | 27.76   | 7.28  | 2 |
| -10 | -3 | 0 | -0.07   | 3.74  | 2 |
| -11 | -3 | 0 | 123.11  | 15.67 | 2 |
| -12 | -3 | 0 | 182.81  | 19.33 | 2 |
| -13 | -3 | 0 | 172.39  | 20.24 | 2 |

-14 -3 0 38.33 10.70 2  
-17 4 0 -0.24 5.88 3  
-16 4 0 7.60 7.20 3  
-15 4 0 0.20 6.74 3  
-15 4 0 11.26 7.08 2  
-14 4 0 -4.71 5.12 3  
-14 4 0 -1.62 4.38 2  
-13 4 0 100.15 13.79 2  
-13 4 0 114.50 15.58 3  
-12 4 0 50.48 10.86 3  
-12 4 0 74.34 11.56 2  
-11 4 0 44.48 9.55 3  
-11 4 0 40.50 8.76 2  
-10 4 0 497.55 26.07 2  
-9 4 0 81.59 10.37 2  
-8 4 0 0.19 2.80 2  
-7 4 0 5.38 3.16 3  
-7 4 0 6.13 3.12 2  
-6 4 0 30.41 5.12 3  
-6 4 0 34.00 6.01 2  
6 -4 0 39.53 3.40 1  
-5 4 0 167.26 10.66 2  
5 -4 0 156.68 7.31 1  
-5 4 0 156.14 9.41 3  
4 -4 0 9.48 2.18 1  
-4 4 0 5.09 2.56 2  
3 -4 0 -1.08 0.68 1  
-3 4 0 0.01 1.24 3  
-3 4 0 2.57 2.04 2  
2 -4 0 343.19 13.21 4  
-2 4 0 274.25 13.38 2  
2 -4 0 326.47 13.01 1  
-2 4 0 337.71 11.99 3  
1 -4 0 16.81 3.07 1  
1 -4 0 17.16 3.12 4  
-1 4 0 16.13 3.50 2  
0 -4 0 2843.09 82.36 4  
0 -4 0 2804.44 82.92 1  
0 4 0 2879.90 85.46 2  
-1 -4 0 1671.19 50.76 1  
-1 -4 0 1618.80 50.12 4  
-4 -4 0 652.86 24.20 4  
-4 -4 0 632.46 24.28 1  
-5 -4 0 105.28 8.43 1  
-5 -4 0 98.70 7.72 4  
-6 -4 0 203.21 12.20 1

|     |    |   |         |       |   |
|-----|----|---|---------|-------|---|
| -6  | -4 | 0 | 194.94  | 14.14 | 2 |
| -6  | -4 | 0 | 212.64  | 11.82 | 4 |
| -7  | -4 | 0 | 433.22  | 23.59 | 2 |
| -7  | -4 | 0 | 420.20  | 19.01 | 4 |
| -7  | -4 | 0 | 440.58  | 19.54 | 1 |
| -8  | -4 | 0 | 2229.49 | 79.15 | 2 |
| -9  | -4 | 0 | 26.38   | 7.14  | 2 |
| -10 | -4 | 0 | 4.32    | 3.86  | 2 |
| -11 | -4 | 0 | 208.26  | 18.58 | 2 |
| -12 | -4 | 0 | -2.43   | 4.24  | 2 |
| -13 | -4 | 0 | 171.49  | 20.81 | 2 |
| -14 | -4 | 0 | 18.07   | 8.15  | 2 |
| -17 | 5  | 0 | 85.66   | 17.43 | 3 |
| -16 | 5  | 0 | 67.82   | 15.06 | 3 |
| -16 | 5  | 0 | 44.13   | 11.29 | 2 |
| -15 | 5  | 0 | 0.68    | 6.16  | 3 |
| -15 | 5  | 0 | 0.69    | 5.04  | 2 |
| -14 | 5  | 0 | 24.45   | 8.22  | 2 |
| -14 | 5  | 0 | 24.33   | 9.40  | 3 |
| -13 | 5  | 0 | 37.37   | 10.07 | 3 |
| -13 | 5  | 0 | 57.77   | 11.46 | 2 |
| -12 | 5  | 0 | 50.64   | 10.82 | 3 |
| -12 | 5  | 0 | 63.77   | 11.18 | 2 |
| -11 | 5  | 0 | 455.24  | 26.01 | 3 |
| -11 | 5  | 0 | 453.94  | 25.80 | 2 |
| -10 | 5  | 0 | 24.83   | 6.79  | 2 |
| -10 | 5  | 0 | 25.05   | 6.57  | 3 |
| -9  | 5  | 0 | 35.55   | 7.30  | 3 |
| -9  | 5  | 0 | 26.54   | 6.93  | 2 |
| -8  | 5  | 0 | 11.12   | 4.52  | 3 |
| -8  | 5  | 0 | 11.69   | 4.48  | 2 |
| -7  | 5  | 0 | -0.19   | 2.45  | 2 |
| -7  | 5  | 0 | 5.26    | 2.92  | 3 |
| 7   | -5 | 0 | 2.42    | 1.62  | 1 |
| 6   | -5 | 0 | 1128.33 | 35.23 | 1 |
| -6  | 5  | 0 | 1147.39 | 39.80 | 3 |
| -6  | 5  | 0 | 1122.57 | 41.30 | 2 |
| -5  | 5  | 0 | 1.24    | 1.33  | 3 |
| -5  | 5  | 0 | 8.81    | 3.31  | 2 |
| 5   | -5 | 0 | 14.86   | 2.70  | 1 |
| -4  | 5  | 0 | 14.62   | 3.86  | 2 |
| -4  | 5  | 0 | 18.33   | 3.42  | 3 |
| 4   | -5 | 0 | 21.87   | 3.36  | 1 |
| -3  | 5  | 0 | 148.43  | 7.40  | 3 |
| 3   | -5 | 0 | 143.67  | 8.16  | 4 |
| 3   | -5 | 0 | 137.84  | 7.99  | 1 |

|     |    |   |         |       |   |
|-----|----|---|---------|-------|---|
| -3  | 5  | 0 | 108.86  | 8.23  | 2 |
| 2   | -5 | 0 | 320.85  | 14.09 | 4 |
| -2  | 5  | 0 | 319.84  | 15.06 | 2 |
| -2  | 5  | 0 | 333.05  | 12.70 | 3 |
| 2   | -5 | 0 | 328.65  | 14.16 | 1 |
| 1   | -5 | 0 | 436.68  | 17.85 | 4 |
| -1  | 5  | 0 | 457.20  | 18.94 | 2 |
| 1   | -5 | 0 | 468.57  | 18.39 | 1 |
| 0   | -5 | 0 | 30.80   | 4.61  | 4 |
| 0   | -5 | 0 | 23.63   | 4.40  | 1 |
| -1  | -5 | 0 | 316.87  | 14.93 | 1 |
| -1  | -5 | 0 | 318.52  | 14.63 | 4 |
| -2  | -5 | 0 | 1086.82 | 36.89 | 1 |
| -2  | -5 | 0 | 1056.15 | 36.34 | 4 |
| -3  | -5 | 0 | 357.52  | 16.85 | 1 |
| -3  | -5 | 0 | 350.71  | 16.44 | 4 |
| -4  | -5 | 0 | 3.04    | 2.88  | 1 |
| -4  | -5 | 0 | 1.76    | 2.30  | 4 |
| -5  | -5 | 0 | 312.23  | 15.51 | 4 |
| -5  | -5 | 0 | 297.02  | 15.74 | 1 |
| -6  | -5 | 0 | 322.01  | 16.52 | 1 |
| -6  | -5 | 0 | 295.97  | 15.52 | 4 |
| -7  | -5 | 0 | 1.28    | 3.40  | 1 |
| -7  | -5 | 0 | 2.24    | 3.37  | 2 |
| -7  | -5 | 0 | 1.87    | 2.92  | 4 |
| -8  | -5 | 0 | 163.87  | 16.33 | 2 |
| -9  | -5 | 0 | 519.60  | 29.93 | 2 |
| -10 | -5 | 0 | 16.59   | 6.29  | 2 |
| -11 | -5 | 0 | 112.29  | 16.54 | 2 |
| -12 | -5 | 0 | 9.16    | 7.35  | 2 |
| -13 | -5 | 0 | 8.72    | 7.19  | 2 |
| -14 | -5 | 0 | 26.23   | 11.63 | 2 |
| -17 | 6  | 0 | -4.94   | 6.82  | 3 |
| -16 | 6  | 0 | 49.55   | 13.66 | 3 |
| -16 | 6  | 0 | 55.06   | 12.40 | 2 |
| -15 | 6  | 0 | -0.10   | 6.74  | 3 |
| -15 | 6  | 0 | -4.84   | 4.92  | 2 |
| -14 | 6  | 0 | 6.47    | 7.15  | 3 |
| -14 | 6  | 0 | 7.30    | 6.41  | 2 |
| -13 | 6  | 0 | 2.39    | 4.58  | 2 |
| -13 | 6  | 0 | -0.82   | 5.42  | 3 |
| -12 | 6  | 0 | -4.71   | 3.91  | 2 |
| -12 | 6  | 0 | 3.83    | 5.97  | 3 |
| -11 | 6  | 0 | 265.16  | 19.43 | 3 |
| -11 | 6  | 0 | 271.34  | 19.59 | 2 |
| -10 | 6  | 0 | 22.02   | 6.83  | 2 |

|     |    |   |         |       |   |
|-----|----|---|---------|-------|---|
| -10 | 6  | 0 | 52.85   | 9.17  | 3 |
| -9  | 6  | 0 | 581.76  | 27.48 | 3 |
| -9  | 6  | 0 | 564.00  | 28.58 | 2 |
| -8  | 6  | 0 | 106.79  | 11.57 | 2 |
| -8  | 6  | 0 | 97.80   | 10.14 | 3 |
| 7   | -6 | 0 | 219.02  | 10.59 | 1 |
| -7  | 6  | 0 | 227.26  | 13.46 | 3 |
| -7  | 6  | 0 | 204.04  | 14.15 | 2 |
| 6   | -6 | 0 | 288.60  | 12.65 | 1 |
| -6  | 6  | 0 | 298.86  | 16.55 | 2 |
| -5  | 6  | 0 | 13.07   | 3.33  | 3 |
| -5  | 6  | 0 | 11.73   | 4.05  | 2 |
| 5   | -6 | 0 | 11.03   | 2.83  | 1 |
| -4  | 6  | 0 | 4.72    | 2.35  | 3 |
| -4  | 6  | 0 | 5.38    | 2.95  | 2 |
| 4   | -6 | 0 | 2.40    | 1.92  | 1 |
| 3   | -6 | 0 | 79.38   | 6.93  | 1 |
| -3  | 6  | 0 | 83.61   | 5.63  | 3 |
| 3   | -6 | 0 | 75.06   | 6.73  | 4 |
| -3  | 6  | 0 | 76.08   | 7.92  | 2 |
| -2  | 6  | 0 | 11.29   | 3.90  | 2 |
| 2   | -6 | 0 | 13.13   | 3.25  | 1 |
| 2   | -6 | 0 | 15.07   | 3.79  | 4 |
| 1   | -6 | 0 | 831.52  | 30.54 | 4 |
| 1   | -6 | 0 | 907.01  | 31.28 | 1 |
| -1  | 6  | 0 | 861.14  | 32.54 | 2 |
| 0   | -6 | 0 | 817.51  | 30.50 | 1 |
| 0   | -6 | 0 | 849.35  | 30.29 | 4 |
| -1  | -6 | 0 | 208.94  | 12.10 | 4 |
| -1  | -6 | 0 | 216.63  | 12.62 | 1 |
| -2  | -6 | 0 | -0.54   | 2.54  | 1 |
| -2  | -6 | 0 | 6.03    | 2.55  | 4 |
| -3  | -6 | 0 | 26.14   | 4.95  | 4 |
| -3  | -6 | 0 | 26.68   | 5.22  | 1 |
| -4  | -6 | 0 | 603.50  | 24.93 | 4 |
| -4  | -6 | 0 | 601.60  | 25.47 | 1 |
| -5  | -6 | 0 | 44.22   | 6.55  | 4 |
| -5  | -6 | 0 | 37.92   | 6.64  | 1 |
| -6  | -6 | 0 | 959.74  | 37.35 | 1 |
| -6  | -6 | 0 | 1039.09 | 37.91 | 4 |
| -7  | -6 | 0 | 281.38  | 16.66 | 4 |
| -7  | -6 | 0 | 285.83  | 17.35 | 1 |
| -7  | -6 | 0 | 276.31  | 19.79 | 2 |
| -8  | -6 | 0 | 19.02   | 6.74  | 2 |
| -9  | -6 | 0 | 6.59    | 5.21  | 2 |
| -10 | -6 | 0 | 3.73    | 5.04  | 2 |

|     |    |   |         |        |   |
|-----|----|---|---------|--------|---|
| -11 | -6 | 0 | 6.56    | 6.19   | 2 |
| -12 | -6 | 0 | 3.07    | 6.31   | 2 |
| -13 | -6 | 0 | 18.70   | 9.13   | 2 |
| -17 | 7  | 0 | 61.75   | 15.16  | 3 |
| -16 | 7  | 0 | -1.75   | 6.72   | 3 |
| -16 | 7  | 0 | 0.95    | 5.70   | 2 |
| -15 | 7  | 0 | 126.79  | 18.29  | 3 |
| -15 | 7  | 0 | 178.05  | 20.52  | 2 |
| -14 | 7  | 0 | 3.38    | 4.92   | 2 |
| -14 | 7  | 0 | -2.95   | 6.29   | 3 |
| -13 | 7  | 0 | 38.13   | 10.12  | 3 |
| -13 | 7  | 0 | 45.09   | 10.66  | 2 |
| -12 | 7  | 0 | 207.97  | 17.96  | 2 |
| -12 | 7  | 0 | 198.84  | 17.67  | 3 |
| -11 | 7  | 0 | 691.40  | 34.75  | 2 |
| -11 | 7  | 0 | 717.90  | 34.41  | 3 |
| -10 | 7  | 0 | 28.48   | 7.08   | 3 |
| -10 | 7  | 0 | 33.47   | 7.76   | 2 |
| -9  | 7  | 0 | 0.47    | 3.79   | 3 |
| -9  | 7  | 0 | -4.16   | 3.10   | 2 |
| -8  | 7  | 0 | 491.42  | 23.12  | 3 |
| 8   | -7 | 0 | 487.58  | 18.97  | 1 |
| -8  | 7  | 0 | 480.13  | 24.88  | 2 |
| -7  | 7  | 0 | 30.51   | 6.75   | 2 |
| 7   | -7 | 0 | 42.18   | 5.11   | 1 |
| 6   | -7 | 0 | 59.48   | 5.93   | 1 |
| -6  | 7  | 0 | 65.55   | 8.87   | 2 |
| -6  | 7  | 0 | 67.04   | 6.95   | 3 |
| 5   | -7 | 0 | -2.25   | 1.17   | 1 |
| -5  | 7  | 0 | -0.86   | 2.22   | 2 |
| -5  | 7  | 0 | 3.06    | 2.41   | 3 |
| -4  | 7  | 0 | 383.72  | 19.10  | 2 |
| 4   | -7 | 0 | 375.57  | 17.04  | 1 |
| -4  | 7  | 0 | 389.06  | 15.92  | 3 |
| -3  | 7  | 0 | 47.10   | 7.09   | 2 |
| -3  | 7  | 0 | 51.01   | 5.04   | 3 |
| 3   | -7 | 0 | 47.05   | 6.34   | 1 |
| 3   | -7 | 0 | 38.68   | 6.01   | 4 |
| 2   | -7 | 0 | 3949.55 | 116.02 | 1 |
| -2  | 7  | 0 | 3876.70 | 119.47 | 2 |
| 2   | -7 | 0 | 3969.08 | 115.42 | 4 |
| 1   | -7 | 0 | 818.89  | 30.38  | 1 |
| 1   | -7 | 0 | 779.04  | 29.91  | 4 |
| -1  | 7  | 0 | 790.17  | 31.54  | 2 |
| 0   | -7 | 0 | 55.12   | 6.91   | 4 |
| 0   | -7 | 0 | 47.23   | 6.73   | 1 |

|     |    |   |        |       |   |
|-----|----|---|--------|-------|---|
| -1  | -7 | 0 | 139.37 | 10.12 | 4 |
| -1  | -7 | 0 | 156.21 | 11.21 | 1 |
| -2  | -7 | 0 | 0.88   | 2.79  | 1 |
| -2  | -7 | 0 | 2.22   | 2.46  | 4 |
| -3  | -7 | 0 | 3.90   | 3.67  | 1 |
| -3  | -7 | 0 | 2.44   | 2.58  | 4 |
| -4  | -7 | 0 | 28.36  | 5.74  | 4 |
| -4  | -7 | 0 | 23.71  | 5.77  | 1 |
| -5  | -7 | 0 | 295.11 | 17.00 | 4 |
| -5  | -7 | 0 | 282.98 | 17.12 | 1 |
| -6  | -7 | 0 | 9.25   | 4.88  | 4 |
| -6  | -7 | 0 | 9.98   | 5.62  | 1 |
| -7  | -7 | 0 | 428.34 | 23.46 | 1 |
| -7  | -7 | 0 | 479.90 | 23.54 | 4 |
| -8  | -7 | 0 | 54.43  | 11.34 | 2 |
| -9  | -7 | 0 | 24.28  | 8.03  | 2 |
| -10 | -7 | 0 | 13.72  | 7.44  | 2 |
| -11 | -7 | 0 | 75.00  | 15.14 | 2 |
| -12 | -7 | 0 | 67.69  | 15.01 | 2 |
| -13 | -7 | 0 | -3.29  | 7.08  | 2 |
| -17 | 8  | 0 | 62.90  | 15.23 | 3 |
| -16 | 8  | 0 | 2.11   | 7.87  | 3 |
| -16 | 8  | 0 | 17.18  | 8.45  | 2 |
| -15 | 8  | 0 | 4.25   | 7.41  | 3 |
| -15 | 8  | 0 | -5.16  | 4.98  | 2 |
| -14 | 8  | 0 | 142.27 | 18.26 | 2 |
| -14 | 8  | 0 | 181.45 | 19.42 | 3 |
| -13 | 8  | 0 | 281.94 | 22.03 | 2 |
| -13 | 8  | 0 | 279.44 | 21.69 | 3 |
| -12 | 8  | 0 | 18.14  | 6.58  | 2 |
| -12 | 8  | 0 | 18.81  | 7.97  | 3 |
| -11 | 8  | 0 | 177.11 | 15.77 | 2 |
| -11 | 8  | 0 | 158.56 | 15.55 | 3 |
| -10 | 8  | 0 | 13.70  | 5.93  | 2 |
| -10 | 8  | 0 | 15.90  | 5.88  | 3 |
| -9  | 8  | 0 | 7.77   | 4.37  | 3 |
| -9  | 8  | 0 | -1.38  | 3.12  | 2 |
| -8  | 8  | 0 | 654.93 | 29.62 | 3 |
| 8   | -8 | 0 | 760.80 | 26.88 | 1 |
| -8  | 8  | 0 | 754.35 | 33.68 | 2 |
| -7  | 8  | 0 | 4.77   | 3.31  | 3 |
| -7  | 8  | 0 | 3.83   | 4.10  | 2 |
| 7   | -8 | 0 | 9.44   | 3.38  | 1 |
| -6  | 8  | 0 | 127.93 | 9.34  | 3 |
| -6  | 8  | 0 | 124.34 | 11.36 | 2 |
| 6   | -8 | 0 | 143.87 | 9.61  | 1 |

|     |    |   |         |       |   |
|-----|----|---|---------|-------|---|
| -5  | 8  | 0 | 11.53   | 4.84  | 2 |
| 5   | -8 | 0 | 22.36   | 4.70  | 1 |
| -5  | 8  | 0 | 10.59   | 3.59  | 3 |
| 4   | -8 | 0 | 413.08  | 18.81 | 1 |
| -4  | 8  | 0 | 395.46  | 16.80 | 3 |
| -4  | 8  | 0 | 406.94  | 20.89 | 2 |
| 3   | -8 | 0 | 72.27   | 8.02  | 4 |
| 3   | -8 | 0 | 70.95   | 7.94  | 1 |
| -3  | 8  | 0 | 51.93   | 8.16  | 2 |
| 2   | -8 | 0 | 98.87   | 9.53  | 1 |
| -2  | 8  | 0 | 104.02  | 10.52 | 2 |
| 2   | -8 | 0 | 93.81   | 9.52  | 4 |
| 1   | -8 | 0 | 1381.26 | 47.12 | 1 |
| 1   | -8 | 0 | 1327.57 | 46.71 | 4 |
| -1  | 8  | 0 | 1335.04 | 48.93 | 2 |
| 0   | -8 | 0 | 900.02  | 34.42 | 4 |
| 0   | -8 | 0 | 887.47  | 34.54 | 1 |
| -1  | -8 | 0 | 85.66   | 9.35  | 4 |
| -1  | -8 | 0 | 92.21   | 9.93  | 1 |
| -2  | -8 | 0 | 160.73  | 12.01 | 4 |
| -2  | -8 | 0 | 149.64  | 12.30 | 1 |
| -3  | -8 | 0 | 24.24   | 6.69  | 1 |
| -3  | -8 | 0 | 23.77   | 5.96  | 4 |
| -4  | -8 | 0 | 3.28    | 3.75  | 4 |
| -4  | -8 | 0 | 14.43   | 5.52  | 1 |
| -5  | -8 | 0 | 127.05  | 12.86 | 1 |
| -5  | -8 | 0 | 119.68  | 12.26 | 4 |
| -6  | -8 | 0 | 111.22  | 12.32 | 4 |
| -6  | -8 | 0 | 128.93  | 13.52 | 1 |
| -7  | -8 | 0 | 3.85    | 5.08  | 1 |
| -7  | -8 | 0 | 8.95    | 4.38  | 4 |
| -8  | -8 | 0 | 18.72   | 7.80  | 2 |
| -9  | -8 | 0 | 101.25  | 16.92 | 2 |
| -10 | -8 | 0 | 9.20    | 7.29  | 2 |
| -11 | -8 | 0 | 11.79   | 8.49  | 2 |
| -12 | -8 | 0 | 16.38   | 10.17 | 2 |
| -13 | -8 | 0 | 7.42    | 10.09 | 2 |
| -17 | 9  | 0 | 141.48  | 20.48 | 3 |
| -16 | 9  | 0 | 7.16    | 8.73  | 3 |
| -16 | 9  | 0 | 16.31   | 8.30  | 2 |
| -15 | 9  | 0 | 13.30   | 7.21  | 2 |
| -15 | 9  | 0 | 20.87   | 10.02 | 3 |
| -14 | 9  | 0 | 70.44   | 13.73 | 2 |
| -14 | 9  | 0 | 68.05   | 13.50 | 3 |
| -13 | 9  | 0 | 47.28   | 10.53 | 2 |
| -13 | 9  | 0 | 43.46   | 11.09 | 3 |



|     |    |   |         |       |   |
|-----|----|---|---------|-------|---|
| -12 | 9  | 0 | 262.71  | 20.61 | 2 |
| -12 | 9  | 0 | 257.17  | 20.25 | 3 |
| -11 | 9  | 0 | 2.22    | 4.18  | 2 |
| -11 | 9  | 0 | 0.78    | 4.43  | 3 |
| -10 | 9  | 0 | 774.26  | 37.33 | 2 |
| -9  | 9  | 0 | 297.56  | 20.48 | 2 |
| -9  | 9  | 0 | 305.36  | 18.11 | 3 |
| 8   | -9 | 0 | 106.30  | 8.41  | 1 |
| -8  | 9  | 0 | 88.07   | 9.68  | 3 |
| -8  | 9  | 0 | 102.53  | 12.44 | 2 |
| -7  | 9  | 0 | 127.56  | 13.15 | 2 |
| 7   | -9 | 0 | 119.06  | 8.94  | 1 |
| -7  | 9  | 0 | 131.76  | 10.13 | 3 |
| -6  | 9  | 0 | 21.83   | 4.89  | 3 |
| -6  | 9  | 0 | 23.79   | 6.25  | 2 |
| -5  | 9  | 0 | 143.62  | 12.49 | 2 |
| -5  | 9  | 0 | 151.11  | 9.98  | 3 |
| 5   | -9 | 0 | 147.89  | 10.80 | 1 |
| -4  | 9  | 0 | 1268.38 | 51.19 | 2 |
| -4  | 9  | 0 | 1549.76 | 47.09 | 3 |
| 4   | -9 | 0 | 1438.67 | 49.15 | 1 |
| 3   | -9 | 0 | 404.71  | 19.80 | 1 |
| 3   | -9 | 0 | 357.59  | 19.10 | 4 |
| -3  | 9  | 0 | 372.79  | 20.70 | 2 |
| -2  | 9  | 0 | 23.34   | 6.27  | 2 |
| 2   | -9 | 0 | 34.21   | 6.77  | 4 |
| 2   | -9 | 0 | 36.26   | 6.89  | 1 |
| -1  | 9  | 0 | 58.46   | 9.05  | 2 |
| 1   | -9 | 0 | 55.03   | 8.67  | 4 |
| 1   | -9 | 0 | 69.17   | 9.24  | 1 |
| 0   | -9 | 0 | 5.65    | 3.68  | 4 |
| 0   | -9 | 0 | 6.94    | 4.54  | 1 |
| -1  | -9 | 0 | 384.27  | 20.69 | 1 |
| -1  | -9 | 0 | 364.52  | 20.15 | 4 |
| -2  | -9 | 0 | 41.13   | 7.98  | 4 |
| -2  | -9 | 0 | 52.57   | 8.93  | 1 |
| -3  | -9 | 0 | 299.99  | 18.81 | 4 |
| -3  | -9 | 0 | 364.19  | 20.48 | 1 |
| -4  | -9 | 0 | 15.95   | 5.45  | 4 |
| -4  | -9 | 0 | 22.91   | 7.13  | 1 |
| -5  | -9 | 0 | 7.61    | 4.87  | 4 |
| -5  | -9 | 0 | 11.55   | 5.50  | 1 |
| -6  | -9 | 0 | -1.47   | 3.68  | 4 |
| -6  | -9 | 0 | 2.67    | 5.69  | 1 |
| -7  | -9 | 0 | -7.62   | 4.40  | 1 |
| -8  | -9 | 0 | 129.29  | 19.18 | 2 |

|     |     |   |         |       |   |
|-----|-----|---|---------|-------|---|
| -9  | -9  | 0 | 22.80   | 9.59  | 2 |
| -10 | -9  | 0 | 109.88  | 20.35 | 2 |
| -11 | -9  | 0 | 32.18   | 11.84 | 2 |
| -12 | -9  | 0 | 0.31    | 8.72  | 2 |
| -16 | 10  | 0 | 111.73  | 18.31 | 2 |
| -15 | 10  | 0 | 106.58  | 17.15 | 2 |
| -14 | 10  | 0 | 13.01   | 7.64  | 2 |
| -13 | 10  | 0 | 26.95   | 9.82  | 3 |
| -13 | 10  | 0 | 39.59   | 10.78 | 2 |
| -12 | 10  | 0 | 45.19   | 10.39 | 3 |
| -12 | 10  | 0 | 43.36   | 10.15 | 2 |
| -11 | 10  | 0 | 73.51   | 12.48 | 2 |
| -10 | 10  | 0 | 19.92   | 7.04  | 2 |
| -10 | 10  | 0 | 24.52   | 7.04  | 3 |
| -9  | 10  | 0 | 5.37    | 4.74  | 2 |
| -9  | 10  | 0 | 3.45    | 4.42  | 3 |
| -8  | 10  | 0 | 53.75   | 10.14 | 2 |
| 8   | -10 | 0 | 49.82   | 6.89  | 1 |
| -8  | 10  | 0 | 46.79   | 7.41  | 3 |
| -7  | 10  | 0 | 22.63   | 6.73  | 2 |
| -7  | 10  | 0 | 14.54   | 4.98  | 3 |
| 7   | -10 | 0 | 9.21    | 3.90  | 1 |
| 6   | -10 | 0 | 0.19    | 2.92  | 1 |
| -6  | 10  | 0 | 5.56    | 3.33  | 3 |
| -6  | 10  | 0 | 0.61    | 3.94  | 2 |
| -5  | 10  | 0 | 33.31   | 5.69  | 3 |
| -5  | 10  | 0 | 32.21   | 7.66  | 2 |
| 5   | -10 | 0 | 40.95   | 7.23  | 1 |
| -4  | 10  | 0 | 424.32  | 23.77 | 2 |
| 4   | -10 | 0 | 465.16  | 22.38 | 1 |
| 3   | -10 | 0 | 1187.79 | 44.98 | 1 |
| 3   | -10 | 0 | 1256.22 | 45.52 | 4 |
| -3  | 10  | 0 | 1215.31 | 47.65 | 2 |
| 2   | -10 | 0 | 11.16   | 5.55  | 4 |
| -2  | 10  | 0 | 18.46   | 5.87  | 2 |
| 2   | -10 | 0 | 21.70   | 6.40  | 1 |
| 1   | -10 | 0 | 103.40  | 11.70 | 1 |
| 1   | -10 | 0 | 98.14   | 11.57 | 4 |
| 0   | -10 | 0 | 77.66   | 10.94 | 1 |
| 0   | -10 | 0 | 97.31   | 11.41 | 4 |
| -1  | -10 | 0 | 132.91  | 13.57 | 1 |
| -1  | -10 | 0 | 114.87  | 12.70 | 4 |
| -2  | -10 | 0 | 174.84  | 14.80 | 1 |
| -2  | -10 | 0 | 159.10  | 13.54 | 4 |
| -3  | -10 | 0 | -7.32   | 2.52  | 4 |
| -3  | -10 | 0 | 2.25    | 4.37  | 1 |

|     |     |   |         |       |   |
|-----|-----|---|---------|-------|---|
| -4  | -10 | 0 | 108.32  | 13.30 | 1 |
| -4  | -10 | 0 | 104.43  | 12.97 | 4 |
| -5  | -10 | 0 | 20.87   | 6.57  | 4 |
| -5  | -10 | 0 | 24.19   | 8.02  | 1 |
| -6  | -10 | 0 | 3.66    | 5.57  | 1 |
| -7  | -10 | 0 | 37.85   | 10.18 | 1 |
| -9  | -10 | 0 | 371.72  | 30.94 | 2 |
| -10 | -10 | 0 | 16.31   | 10.26 | 2 |
| -11 | -10 | 0 | 10.94   | 11.48 | 2 |
| -16 | 11  | 0 | 22.49   | 10.31 | 2 |
| -15 | 11  | 0 | -3.20   | 6.05  | 2 |
| -14 | 11  | 0 | 35.47   | 11.32 | 2 |
| -13 | 11  | 0 | 292.59  | 23.96 | 2 |
| -12 | 11  | 0 | 353.26  | 25.49 | 2 |
| -11 | 11  | 0 | -3.56   | 3.53  | 2 |
| -10 | 11  | 0 | 10.92   | 6.02  | 2 |
| -9  | 11  | 0 | 64.09   | 11.50 | 2 |
| 8   | -11 | 0 | 288.92  | 16.48 | 1 |
| -8  | 11  | 0 | 299.14  | 20.65 | 2 |
| 7   | -11 | 0 | 151.73  | 11.84 | 1 |
| -7  | 11  | 0 | 148.05  | 15.33 | 2 |
| -6  | 11  | 0 | 121.18  | 13.78 | 2 |
| 6   | -11 | 0 | 110.49  | 11.03 | 1 |
| 5   | -11 | 0 | 109.19  | 11.23 | 1 |
| -5  | 11  | 0 | 105.12  | 13.10 | 2 |
| 4   | -11 | 0 | 1072.10 | 41.75 | 1 |
| -4  | 11  | 0 | 1074.39 | 44.72 | 2 |
| -3  | 11  | 0 | 315.84  | 20.93 | 2 |
| 3   | -11 | 0 | 298.62  | 18.76 | 1 |
| 2   | -11 | 0 | 33.32   | 8.03  | 4 |
| -2  | 11  | 0 | 49.42   | 9.72  | 2 |
| 2   | -11 | 0 | 24.57   | 6.65  | 1 |
| 1   | -11 | 0 | 0.90    | 3.74  | 4 |
| 1   | -11 | 0 | 0.59    | 4.44  | 1 |
| 0   | -11 | 0 | 534.57  | 27.80 | 1 |
| 0   | -11 | 0 | 549.23  | 27.52 | 4 |
| -1  | -11 | 0 | 3.72    | 4.11  | 4 |
| -1  | -11 | 0 | 2.53    | 5.29  | 1 |
| -2  | -11 | 0 | 163.53  | 14.34 | 4 |
| -2  | -11 | 0 | 162.72  | 16.14 | 1 |
| -3  | -11 | 0 | -2.11   | 5.02  | 1 |
| -3  | -11 | 0 | 6.08    | 4.64  | 4 |
| -4  | -11 | 0 | 84.39   | 12.81 | 1 |
| -4  | -11 | 0 | 102.55  | 13.35 | 4 |
| -5  | -11 | 0 | 74.38   | 11.95 | 1 |
| -6  | -11 | 0 | 94.34   | 14.35 | 1 |

|     |     |   |        |       |   |
|-----|-----|---|--------|-------|---|
| -7  | -11 | 0 | 13.19  | 8.21  | 1 |
| -9  | -11 | 0 | 130.12 | 23.38 | 2 |
| -10 | -11 | 0 | 3.91   | 9.64  | 2 |
| -11 | -11 | 0 | 30.34  | 17.54 | 2 |
| -16 | 12  | 0 | 18.46  | 10.17 | 2 |
| -15 | 12  | 0 | -1.22  | 6.25  | 2 |
| -14 | 12  | 0 | 13.07  | 7.64  | 2 |
| -13 | 12  | 0 | 680.92 | 38.71 | 2 |
| -12 | 12  | 0 | -0.11  | 4.57  | 2 |
| -11 | 12  | 0 | 107.16 | 15.79 | 2 |
| -10 | 12  | 0 | 9.59   | 5.80  | 2 |
| -9  | 12  | 0 | 52.20  | 10.78 | 2 |
| -8  | 12  | 0 | 53.52  | 11.09 | 2 |
| 7   | -12 | 0 | 9.36   | 4.73  | 1 |
| -7  | 12  | 0 | 1.64   | 4.82  | 2 |
| 6   | -12 | 0 | 642.84 | 29.11 | 1 |
| -6  | 12  | 0 | 652.07 | 33.12 | 2 |
| 5   | -12 | 0 | 214.88 | 15.58 | 1 |
| -5  | 12  | 0 | 221.62 | 17.68 | 2 |
| -4  | 12  | 0 | 7.60   | 5.26  | 2 |
| 4   | -12 | 0 | 18.78  | 6.43  | 1 |
| 3   | -12 | 0 | 1.84   | 4.54  | 1 |
| -3  | 12  | 0 | 8.10   | 5.59  | 2 |
| 2   | -12 | 0 | 81.79  | 11.98 | 1 |
| -2  | 12  | 0 | 74.82  | 12.61 | 2 |
| 1   | -12 | 0 | 56.17  | 10.46 | 4 |
| 1   | -12 | 0 | 51.24  | 10.23 | 1 |
| 0   | -12 | 0 | 433.91 | 25.05 | 1 |
| 0   | -12 | 0 | 409.22 | 23.97 | 4 |
| -1  | -12 | 0 | 7.88   | 5.51  | 1 |
| -1  | -12 | 0 | 1.03   | 3.92  | 4 |
| -2  | -12 | 0 | 132.62 | 15.13 | 4 |
| -2  | -12 | 0 | 132.84 | 15.49 | 1 |
| -3  | -12 | 0 | 223.42 | 18.22 | 1 |
| -4  | -12 | 0 | 20.91  | 8.77  | 1 |
| -5  | -12 | 0 | 14.30  | 7.84  | 1 |
| -6  | -12 | 0 | 217.32 | 19.12 | 1 |
| -7  | -12 | 0 | 530.44 | 31.95 | 1 |
| -9  | -12 | 0 | 15.93  | 13.01 | 2 |
| -10 | -12 | 0 | 18.54  | 15.07 | 2 |
| -16 | 13  | 0 | 6.68   | 7.97  | 2 |
| -15 | 13  | 0 | 132.43 | 20.35 | 2 |
| -14 | 13  | 0 | 28.78  | 9.93  | 2 |
| -13 | 13  | 0 | 6.20   | 6.89  | 2 |
| -12 | 13  | 0 | 260.90 | 22.33 | 2 |
| -11 | 13  | 0 | 126.51 | 17.10 | 2 |

|     |     |   |        |       |   |
|-----|-----|---|--------|-------|---|
| -10 | 13  | 0 | 21.79  | 8.11  | 2 |
| -9  | 13  | 0 | 115.61 | 15.64 | 2 |
| -8  | 13  | 0 | -1.61  | 4.10  | 2 |
| 8   | -13 | 0 | 6.28   | 5.12  | 1 |
| 7   | -13 | 0 | 16.16  | 6.71  | 1 |
| -7  | 13  | 0 | 9.48   | 5.86  | 2 |
| -6  | 13  | 0 | 146.83 | 16.95 | 2 |
| 6   | -13 | 0 | 135.79 | 14.11 | 1 |
| 5   | -13 | 0 | 3.19   | 5.04  | 1 |
| -5  | 13  | 0 | -5.29  | 3.07  | 2 |
| 4   | -13 | 0 | 14.26  | 6.41  | 1 |
| -4  | 13  | 0 | 12.74  | 6.76  | 2 |
| -3  | 13  | 0 | 16.47  | 6.84  | 2 |
| 3   | -13 | 0 | 15.85  | 7.30  | 1 |
| 2   | -13 | 0 | 384.73 | 24.00 | 1 |
| 1   | -13 | 0 | 14.98  | 7.16  | 1 |
| 0   | -13 | 0 | 74.37  | 12.22 | 1 |
| -1  | -13 | 0 | 254.44 | 19.80 | 1 |
| -2  | -13 | 0 | 3.85   | 7.03  | 1 |
| -3  | -13 | 0 | 233.99 | 19.55 | 1 |
| -4  | -13 | 0 | 34.53  | 9.96  | 1 |
| -5  | -13 | 0 | -1.14  | 6.66  | 1 |
| -6  | -13 | 0 | 76.40  | 14.31 | 1 |
| -7  | -13 | 0 | 22.36  | 10.02 | 1 |
| -9  | -13 | 0 | 10.37  | 16.61 | 2 |
| -15 | 14  | 0 | 33.05  | 11.85 | 2 |
| -14 | 14  | 0 | 16.65  | 8.47  | 2 |
| -13 | 14  | 0 | 14.51  | 8.45  | 2 |
| -12 | 14  | 0 | 74.74  | 14.63 | 2 |
| -11 | 14  | 0 | 153.15 | 19.35 | 2 |
| -10 | 14  | 0 | 5.87   | 6.42  | 2 |
| -9  | 14  | 0 | 109.73 | 16.30 | 2 |
| -8  | 14  | 0 | 290.76 | 22.73 | 2 |
| 8   | -14 | 0 | 286.39 | 19.78 | 1 |
| -7  | 14  | 0 | 9.72   | 6.57  | 2 |
| 7   | -14 | 0 | 5.95   | 6.42  | 1 |
| -6  | 14  | 0 | 27.12  | 9.01  | 2 |
| 6   | -14 | 0 | 39.70  | 9.74  | 1 |
| -5  | 14  | 0 | -2.68  | 4.22  | 2 |
| 5   | -14 | 0 | -0.16  | 5.65  | 1 |
| 4   | -14 | 0 | 4.62   | 6.19  | 1 |
| -4  | 14  | 0 | -2.92  | 3.07  | 2 |
| 3   | -14 | 0 | 79.85  | 12.97 | 1 |
| -3  | 14  | 0 | 87.50  | 14.51 | 2 |
| 2   | -14 | 0 | 5.18   | 6.74  | 1 |
| 1   | -14 | 0 | 46.37  | 10.64 | 1 |

|     |     |   |        |       |   |
|-----|-----|---|--------|-------|---|
| 0   | -14 | 0 | 6.98   | 6.66  | 1 |
| -1  | -14 | 0 | 67.25  | 12.35 | 1 |
| -2  | -14 | 0 | 22.00  | 8.34  | 1 |
| -3  | -14 | 0 | -5.40  | 5.87  | 1 |
| -4  | -14 | 0 | 288.80 | 23.17 | 1 |
| -5  | -14 | 0 | 127.56 | 18.29 | 1 |
| -6  | -14 | 0 | 5.26   | 7.72  | 1 |
| -15 | 15  | 0 | 19.65  | 11.30 | 2 |
| -14 | 15  | 0 | 51.18  | 13.62 | 2 |
| -13 | 15  | 0 | 9.33   | 7.62  | 2 |
| -12 | 15  | 0 | 41.44  | 11.92 | 2 |
| -11 | 15  | 0 | 14.16  | 8.17  | 2 |
| -10 | 15  | 0 | 32.68  | 10.40 | 2 |
| -9  | 15  | 0 | 3.71   | 5.72  | 2 |
| -8  | 15  | 0 | 6.47   | 6.84  | 2 |
| 8   | -15 | 0 | 5.20   | 6.51  | 1 |
| 7   | -15 | 0 | 70.31  | 12.70 | 1 |
| -7  | 15  | 0 | 39.18  | 10.07 | 2 |
| 6   | -15 | 0 | 5.50   | 6.65  | 1 |
| -6  | 15  | 0 | 1.41   | 4.92  | 2 |
| 5   | -15 | 0 | 108.97 | 14.63 | 1 |
| -5  | 15  | 0 | 68.89  | 13.33 | 2 |
| 4   | -15 | 0 | 150.70 | 16.97 | 1 |
| -4  | 15  | 0 | 131.21 | 18.31 | 2 |
| 3   | -15 | 0 | 23.96  | 8.70  | 1 |
| 2   | -15 | 0 | 173.01 | 18.54 | 1 |
| 1   | -15 | 0 | 198.40 | 20.32 | 1 |
| 0   | -15 | 0 | 52.69  | 11.73 | 1 |
| -1  | -15 | 0 | 126.56 | 17.27 | 1 |
| -2  | -15 | 0 | 28.09  | 9.87  | 1 |
| -3  | -15 | 0 | 4.41   | 8.11  | 1 |
| -4  | -15 | 0 | 167.93 | 20.08 | 1 |
| -5  | -15 | 0 | 18.73  | 9.68  | 1 |
| -6  | -15 | 0 | 35.47  | 12.03 | 1 |
| -14 | 16  | 0 | -0.02  | 8.14  | 2 |
| -13 | 16  | 0 | 2.48   | 7.65  | 2 |
| -12 | 16  | 0 | 15.42  | 8.73  | 2 |
| -11 | 16  | 0 | 62.40  | 14.18 | 2 |
| -10 | 16  | 0 | 178.51 | 21.62 | 2 |
| -9  | 16  | 0 | 13.55  | 8.15  | 2 |
| -8  | 16  | 0 | 7.04   | 6.99  | 2 |
| 8   | -16 | 0 | 9.58   | 8.24  | 1 |
| 7   | -16 | 0 | 1.27   | 6.93  | 1 |
| -7  | 16  | 0 | -3.94  | 5.49  | 2 |
| 6   | -16 | 0 | 49.82  | 11.85 | 1 |
| -6  | 16  | 0 | 29.21  | 10.66 | 2 |

|     |     |   |        |       |   |
|-----|-----|---|--------|-------|---|
| -5  | 16  | 0 | 138.65 | 19.14 | 2 |
| 5   | -16 | 0 | 133.61 | 17.28 | 1 |
| 4   | -16 | 0 | 25.85  | 10.03 | 1 |
| -4  | 16  | 0 | 18.64  | 8.96  | 2 |
| 3   | -16 | 0 | 67.51  | 13.52 | 1 |
| 2   | -16 | 0 | 30.84  | 10.87 | 1 |
| 1   | -16 | 0 | 19.61  | 9.28  | 1 |
| 0   | -16 | 0 | -4.44  | 7.05  | 1 |
| -1  | -16 | 0 | 27.41  | 10.47 | 1 |
| -2  | -16 | 0 | 201.98 | 21.94 | 1 |
| -3  | -16 | 0 | 7.76   | 8.29  | 1 |
| -4  | -16 | 0 | -2.75  | 9.08  | 1 |
| -5  | -16 | 0 | 4.60   | 9.39  | 1 |
| -6  | -16 | 0 | 55.91  | 16.47 | 1 |
| -13 | 17  | 0 | 7.57   | 9.70  | 2 |
| -12 | 17  | 0 | 8.78   | 8.20  | 2 |
| -11 | 17  | 0 | -2.34  | 7.43  | 2 |
| -10 | 17  | 0 | 1.54   | 7.07  | 2 |
| -9  | 17  | 0 | 0.29   | 6.30  | 2 |
| -8  | 17  | 0 | 43.92  | 12.04 | 2 |
| 8   | -17 | 0 | 31.39  | 11.76 | 1 |
| 7   | -17 | 0 | 9.95   | 8.38  | 1 |
| -7  | 17  | 0 | 13.21  | 7.82  | 2 |
| -6  | 17  | 0 | 34.03  | 10.75 | 2 |
| 6   | -17 | 0 | 24.20  | 9.98  | 1 |
| 5   | -17 | 0 | 24.07  | 10.09 | 1 |
| -5  | 17  | 0 | 13.80  | 9.36  | 2 |
| 4   | -17 | 0 | 166.34 | 19.78 | 1 |
| 3   | -17 | 0 | 38.66  | 11.59 | 1 |
| 2   | -17 | 0 | 4.66   | 8.08  | 1 |
| 1   | -17 | 0 | 0.41   | 8.38  | 1 |
| 0   | -17 | 0 | 12.50  | 8.80  | 1 |
| -1  | -17 | 0 | -9.13  | 7.15  | 1 |
| -2  | -17 | 0 | 69.57  | 15.28 | 1 |
| -3  | -17 | 0 | 3.72   | 9.09  | 1 |
| -4  | -17 | 0 | 10.77  | 10.30 | 1 |
| -12 | 18  | 0 | 113.02 | 21.28 | 2 |
| -11 | 18  | 0 | 12.29  | 9.77  | 2 |
| -10 | 18  | 0 | -3.41  | 7.88  | 2 |
| -9  | 18  | 0 | 65.99  | 15.21 | 2 |
| 8   | -18 | 0 | 9.96   | 9.43  | 1 |
| -8  | 18  | 0 | 0.48   | 8.39  | 2 |
| 7   | -18 | 0 | 13.63  | 8.75  | 1 |
| -7  | 18  | 0 | 11.46  | 8.13  | 2 |
| 6   | -18 | 0 | 0.44   | 7.94  | 1 |
| -6  | 18  | 0 | 0.73   | 7.31  | 2 |

|     |     |    |        |       |   |
|-----|-----|----|--------|-------|---|
| 5   | -18 | 0  | 47.76  | 12.84 | 1 |
| 4   | -18 | 0  | -0.91  | 8.40  | 1 |
| 3   | -18 | 0  | 6.57   | 8.73  | 1 |
| 2   | -18 | 0  | 7.83   | 8.57  | 1 |
| 1   | -18 | 0  | 36.94  | 12.42 | 1 |
| 0   | -18 | 0  | 29.59  | 11.70 | 1 |
| -1  | -18 | 0  | -8.73  | 8.83  | 1 |
| -2  | -18 | 0  | 17.00  | 12.23 | 1 |
| -3  | -18 | 0  | 7.56   | 12.06 | 1 |
| -10 | 19  | 0  | 11.01  | 9.83  | 2 |
| -9  | 19  | 0  | 31.54  | 12.94 | 2 |
| 8   | -19 | 0  | 88.99  | 16.39 | 1 |
| -8  | 19  | 0  | 102.08 | 19.16 | 2 |
| 7   | -19 | 0  | 7.38   | 9.98  | 1 |
| -7  | 19  | 0  | 8.36   | 9.64  | 2 |
| 6   | -19 | 0  | 38.75  | 11.78 | 1 |
| 5   | -19 | 0  | 46.78  | 13.24 | 1 |
| 4   | -19 | 0  | 17.34  | 9.87  | 1 |
| 3   | -19 | 0  | -1.74  | 9.11  | 1 |
| 2   | -19 | 0  | 7.93   | 7.55  | 1 |
| 1   | -19 | 0  | 6.33   | 7.58  | 1 |
| 0   | -19 | 0  | 7.06   | 10.69 | 1 |
| -8  | 20  | 0  | 9.10   | 11.34 | 2 |
| 8   | -20 | 0  | -2.38  | 9.51  | 1 |
| 7   | -20 | 0  | 30.37  | 12.11 | 1 |
| -7  | 20  | 0  | 6.46   | 9.01  | 2 |
| 6   | -20 | 0  | 7.56   | 9.90  | 1 |
| 5   | -20 | 0  | 18.28  | 8.83  | 1 |
| 4   | -20 | 0  | 3.12   | 7.84  | 1 |
| 3   | -20 | 0  | 6.08   | 7.87  | 1 |
| 2   | -20 | 1  | -0.06  | 6.63  | 1 |
| 3   | -20 | 1  | -6.60  | 6.79  | 1 |
| 4   | -20 | 1  | 1.89   | 7.84  | 1 |
| 5   | -20 | 1  | 127.99 | 19.74 | 1 |
| 6   | -20 | 1  | -6.77  | 8.50  | 1 |
| -7  | 20  | -1 | -1.89  | 9.04  | 2 |
| 7   | -20 | 1  | 6.00   | 9.33  | 1 |
| -8  | 20  | -1 | 56.19  | 15.64 | 2 |
| 8   | -20 | 1  | 58.46  | 14.55 | 1 |
| -1  | -19 | 1  | 20.77  | 13.05 | 1 |
| 0   | -19 | 1  | 3.30   | 9.67  | 1 |
| 1   | -19 | 1  | -0.81  | 7.66  | 1 |
| 2   | -19 | 1  | 5.90   | 8.68  | 1 |
| 3   | -19 | 1  | 70.34  | 15.44 | 1 |
| 4   | -19 | 1  | 3.35   | 8.26  | 1 |
| 5   | -19 | 1  | -1.50  | 8.96  | 1 |



|     |     |    |        |       |   |
|-----|-----|----|--------|-------|---|
| 6   | -19 | 1  | 5.04   | 9.70  | 1 |
| -6  | 19  | -1 | 7.44   | 9.10  | 2 |
| 7   | -19 | 1  | -3.51  | 8.11  | 1 |
| -7  | 19  | -1 | 13.66  | 9.57  | 2 |
| -8  | 19  | -1 | 45.89  | 13.61 | 2 |
| 8   | -19 | 1  | 45.02  | 13.58 | 1 |
| -9  | 19  | -1 | -3.17  | 8.25  | 2 |
| -10 | 19  | -1 | 11.91  | 10.01 | 2 |
| -3  | -18 | 1  | 28.80  | 12.86 | 1 |
| -2  | -18 | 1  | -8.40  | 9.67  | 1 |
| -1  | -18 | 1  | 2.74   | 9.11  | 1 |
| 0   | -18 | 1  | -3.27  | 8.19  | 1 |
| 1   | -18 | 1  | 20.30  | 10.76 | 1 |
| 2   | -18 | 1  | 33.68  | 11.71 | 1 |
| 3   | -18 | 1  | 6.71   | 8.57  | 1 |
| 4   | -18 | 1  | -4.19  | 7.57  | 1 |
| -5  | 18  | -1 | 14.86  | 9.55  | 2 |
| 5   | -18 | 1  | 5.96   | 8.69  | 1 |
| -6  | 18  | -1 | 5.11   | 8.15  | 2 |
| 6   | -18 | 1  | 12.79  | 9.93  | 1 |
| -7  | 18  | -1 | -8.02  | 5.97  | 2 |
| 7   | -18 | 1  | 4.14   | 9.00  | 1 |
| -8  | 18  | -1 | 8.56   | 7.93  | 2 |
| 8   | -18 | 1  | 12.35  | 9.78  | 1 |
| -9  | 18  | -1 | 289.86 | 26.42 | 2 |
| -10 | 18  | -1 | 45.74  | 13.76 | 2 |
| -11 | 18  | -1 | 72.80  | 16.97 | 2 |
| -12 | 18  | -1 | 130.37 | 22.07 | 2 |
| -5  | -17 | 1  | 2.52   | 10.54 | 1 |
| -4  | -17 | 1  | -2.64  | 9.75  | 1 |
| -3  | -17 | 1  | -18.37 | 7.14  | 1 |
| -2  | -17 | 1  | 41.66  | 12.55 | 1 |
| -1  | -17 | 1  | 56.12  | 13.44 | 1 |
| 0   | -17 | 1  | 119.83 | 17.44 | 1 |
| 1   | -17 | 1  | 131.80 | 18.86 | 1 |
| 2   | -17 | 1  | -1.08  | 7.79  | 1 |
| 3   | -17 | 1  | 3.54   | 8.20  | 1 |
| -4  | 17  | -1 | 2.31   | 7.82  | 2 |
| 4   | -17 | 1  | 9.05   | 8.96  | 1 |
| -5  | 17  | -1 | 22.71  | 10.19 | 2 |
| 5   | -17 | 1  | 31.31  | 10.95 | 1 |
| 6   | -17 | 1  | 47.73  | 11.82 | 1 |
| -6  | 17  | -1 | 51.60  | 12.94 | 2 |
| -7  | 17  | -1 | 30.77  | 10.98 | 2 |
| 7   | -17 | 1  | 16.70  | 9.92  | 1 |
| 8   | -17 | 1  | -0.84  | 7.24  | 1 |

|     |     |    |        |       |   |
|-----|-----|----|--------|-------|---|
| -8  | 17  | -1 | 1.80   | 6.02  | 2 |
| -9  | 17  | -1 | 35.66  | 11.71 | 2 |
| -10 | 17  | -1 | 1.17   | 6.46  | 2 |
| -11 | 17  | -1 | 7.56   | 7.93  | 2 |
| -12 | 17  | -1 | 31.24  | 12.01 | 2 |
| -13 | 17  | -1 | 225.15 | 26.97 | 2 |
| -6  | -16 | 1  | 23.06  | 11.93 | 1 |
| -5  | -16 | 1  | -7.15  | 9.21  | 1 |
| -4  | -16 | 1  | 0.37   | 8.13  | 1 |
| -3  | -16 | 1  | 18.99  | 9.03  | 1 |
| -2  | -16 | 1  | -4.81  | 7.48  | 1 |
| -1  | -16 | 1  | 8.75   | 8.34  | 1 |
| 0   | -16 | 1  | 2.19   | 7.87  | 1 |
| 1   | -16 | 1  | 44.25  | 12.23 | 1 |
| 2   | -16 | 1  | -9.51  | 7.23  | 1 |
| 3   | -16 | 1  | 91.95  | 15.08 | 1 |
| 4   | -16 | 1  | 4.25   | 7.08  | 1 |
| -4  | 16  | -1 | -0.57  | 7.66  | 2 |
| -5  | 16  | -1 | 0.42   | 5.45  | 2 |
| 5   | -16 | 1  | 7.24   | 6.75  | 1 |
| -6  | 16  | -1 | 36.62  | 10.60 | 2 |
| 6   | -16 | 1  | 25.24  | 8.80  | 1 |
| -7  | 16  | -1 | 56.26  | 12.67 | 2 |
| 7   | -16 | 1  | 50.36  | 11.55 | 1 |
| -8  | 16  | -1 | 1.59   | 5.97  | 2 |
| 8   | -16 | 1  | 9.62   | 6.76  | 1 |
| -9  | 16  | -1 | 9.19   | 7.09  | 2 |
| -10 | 16  | -1 | 35.34  | 11.67 | 2 |
| -11 | 16  | -1 | 8.59   | 7.57  | 2 |
| -12 | 16  | -1 | 28.83  | 10.97 | 2 |
| -13 | 16  | -1 | 6.63   | 7.57  | 2 |
| -14 | 16  | -1 | 18.16  | 11.15 | 2 |
| -7  | -15 | 1  | -5.53  | 9.68  | 1 |
| -6  | -15 | 1  | -3.60  | 8.10  | 1 |
| -5  | -15 | 1  | -4.96  | 7.35  | 1 |
| -4  | -15 | 1  | 52.67  | 12.35 | 1 |
| -3  | -15 | 1  | 1.18   | 7.57  | 1 |
| -2  | -15 | 1  | 10.38  | 7.72  | 1 |
| -1  | -15 | 1  | 149.35 | 18.30 | 1 |
| 0   | -15 | 1  | 62.93  | 12.29 | 1 |
| 1   | -15 | 1  | 2.84   | 6.74  | 1 |
| 2   | -15 | 1  | 66.38  | 13.00 | 1 |
| -3  | 15  | -1 | 14.05  | 7.79  | 2 |
| 3   | -15 | 1  | 9.61   | 6.82  | 1 |
| 4   | -15 | 1  | 28.24  | 9.54  | 1 |
| -4  | 15  | -1 | 26.92  | 9.31  | 2 |

|     |     |    |        |       |   |
|-----|-----|----|--------|-------|---|
| 5   | -15 | 1  | 9.17   | 6.99  | 1 |
| -5  | 15  | -1 | 5.68   | 6.22  | 2 |
| 6   | -15 | 1  | 76.36  | 12.35 | 1 |
| -6  | 15  | -1 | 50.71  | 11.01 | 2 |
| 7   | -15 | 1  | 11.63  | 6.76  | 1 |
| -7  | 15  | -1 | 20.32  | 8.45  | 2 |
| 8   | -15 | 1  | 1.75   | 5.78  | 1 |
| -8  | 15  | -1 | 8.58   | 6.96  | 2 |
| -9  | 15  | -1 | 17.86  | 8.36  | 2 |
| -10 | 15  | -1 | 66.42  | 13.78 | 2 |
| -11 | 15  | -1 | 73.02  | 14.58 | 2 |
| -12 | 15  | -1 | 67.82  | 14.59 | 2 |
| -13 | 15  | -1 | 49.66  | 12.86 | 2 |
| -14 | 15  | -1 | -4.09  | 7.19  | 2 |
| -7  | -14 | 1  | 9.65   | 8.88  | 1 |
| -6  | -14 | 1  | 47.16  | 12.65 | 1 |
| -5  | -14 | 1  | 33.43  | 11.12 | 1 |
| -4  | -14 | 1  | 44.02  | 11.14 | 1 |
| -3  | -14 | 1  | 84.66  | 14.23 | 1 |
| -3  | -14 | 1  | 75.34  | 12.52 | 4 |
| -2  | -14 | 1  | 2.48   | 5.03  | 4 |
| -2  | -14 | 1  | 3.61   | 6.25  | 1 |
| -1  | -14 | 1  | -4.62  | 5.39  | 1 |
| -1  | -14 | 1  | 1.93   | 5.25  | 4 |
| 0   | -14 | 1  | -7.89  | 5.42  | 1 |
| 0   | -14 | 1  | -0.92  | 4.64  | 4 |
| 1   | -14 | 1  | 9.00   | 7.35  | 1 |
| 1   | -14 | 1  | 18.15  | 8.00  | 4 |
| 2   | -14 | 1  | 266.64 | 20.10 | 1 |
| 2   | -14 | 1  | 244.97 | 19.37 | 4 |
| 3   | -14 | 1  | 224.57 | 18.54 | 1 |
| -3  | 14  | -1 | 235.01 | 20.18 | 2 |
| 4   | -14 | 1  | 15.41  | 7.73  | 1 |
| -4  | 14  | -1 | 8.39   | 6.64  | 2 |
| 5   | -14 | 1  | 20.27  | 7.91  | 1 |
| -5  | 14  | -1 | 15.44  | 6.62  | 2 |
| -6  | 14  | -1 | 18.53  | 8.03  | 2 |
| 6   | -14 | 1  | 31.84  | 8.97  | 1 |
| 7   | -14 | 1  | 1.46   | 5.43  | 1 |
| -7  | 14  | -1 | 10.20  | 6.22  | 2 |
| -8  | 14  | -1 | 48.20  | 11.44 | 2 |
| 8   | -14 | 1  | 30.48  | 8.75  | 1 |
| -9  | 14  | -1 | 71.11  | 13.49 | 2 |
| -10 | 14  | -1 | 2.71   | 6.37  | 2 |
| -11 | 14  | -1 | 4.44   | 5.96  | 2 |
| -12 | 14  | -1 | 31.85  | 10.19 | 2 |

|     |     |    |        |       |   |
|-----|-----|----|--------|-------|---|
| -13 | 14  | -1 | 5.00   | 6.62  | 2 |
| -14 | 14  | -1 | 0.38   | 7.68  | 2 |
| -15 | 14  | -1 | -0.34  | 7.10  | 2 |
| -9  | -13 | 1  | 45.02  | 20.35 | 2 |
| -7  | -13 | 1  | 108.83 | 17.04 | 1 |
| -6  | -13 | 1  | 43.18  | 11.69 | 1 |
| -5  | -13 | 1  | -1.98  | 6.30  | 1 |
| -5  | -13 | 1  | 9.95   | 6.25  | 4 |
| -4  | -13 | 1  | 78.91  | 12.74 | 4 |
| -4  | -13 | 1  | 69.25  | 13.27 | 1 |
| -3  | -13 | 1  | 223.81 | 18.51 | 4 |
| -3  | -13 | 1  | 230.40 | 19.52 | 1 |
| -2  | -13 | 1  | 1.01   | 4.55  | 4 |
| -2  | -13 | 1  | 0.68   | 5.90  | 1 |
| -1  | -13 | 1  | 5.49   | 6.11  | 1 |
| -1  | -13 | 1  | 15.60  | 6.20  | 4 |
| 0   | -13 | 1  | 199.14 | 17.07 | 1 |
| 0   | -13 | 1  | 210.14 | 16.79 | 4 |
| 1   | -13 | 1  | 63.87  | 12.00 | 1 |
| 1   | -13 | 1  | 83.61  | 13.15 | 4 |
| 2   | -13 | 1  | 129.15 | 14.90 | 1 |
| 2   | -13 | 1  | 142.10 | 15.32 | 4 |
| -2  | 13  | -1 | 100.89 | 15.16 | 2 |
| 3   | -13 | 1  | 7.28   | 5.50  | 4 |
| -3  | 13  | -1 | 8.72   | 6.43  | 2 |
| 3   | -13 | 1  | 6.16   | 5.86  | 1 |
| -4  | 13  | -1 | 64.36  | 11.92 | 2 |
| 4   | -13 | 1  | 46.62  | 10.07 | 1 |
| -5  | 13  | -1 | 1.44   | 4.76  | 2 |
| 5   | -13 | 1  | 5.95   | 5.82  | 1 |
| -6  | 13  | -1 | 124.84 | 15.72 | 2 |
| 6   | -13 | 1  | 146.68 | 13.92 | 1 |
| -7  | 13  | -1 | 11.71  | 6.25  | 2 |
| 7   | -13 | 1  | 10.98  | 5.25  | 1 |
| -8  | 13  | -1 | 14.68  | 6.78  | 2 |
| 8   | -13 | 1  | 2.59   | 4.04  | 1 |
| -9  | 13  | -1 | 279.81 | 21.74 | 2 |
| -10 | 13  | -1 | 79.15  | 14.29 | 2 |
| -11 | 13  | -1 | 3.47   | 5.25  | 2 |
| -12 | 13  | -1 | -2.90  | 5.75  | 2 |
| -13 | 13  | -1 | 8.78   | 6.64  | 2 |
| -14 | 13  | -1 | 12.65  | 7.82  | 2 |
| -15 | 13  | -1 | 13.13  | 8.81  | 2 |
| -10 | -12 | 1  | -5.65  | 12.26 | 2 |
| -9  | -12 | 1  | 61.88  | 18.46 | 2 |
| -7  | -12 | 1  | 147.98 | 18.35 | 1 |

|     |     |    |        |       |   |
|-----|-----|----|--------|-------|---|
| -6  | -12 | 1  | 26.99  | 7.62  | 4 |
| -6  | -12 | 1  | 5.85   | 7.50  | 1 |
| -5  | -12 | 1  | 121.14 | 15.45 | 4 |
| -5  | -12 | 1  | 110.51 | 15.65 | 1 |
| -4  | -12 | 1  | -2.29  | 4.59  | 4 |
| -4  | -12 | 1  | -6.51  | 5.39  | 1 |
| -3  | -12 | 1  | -0.60  | 5.00  | 1 |
| -3  | -12 | 1  | -2.71  | 4.36  | 4 |
| -2  | -12 | 1  | 4.17   | 4.80  | 4 |
| -2  | -12 | 1  | -2.99  | 4.25  | 1 |
| -1  | -12 | 1  | 106.21 | 13.11 | 4 |
| -1  | -12 | 1  | 111.90 | 13.67 | 1 |
| 0   | -12 | 1  | 553.64 | 28.36 | 1 |
| 0   | -12 | 1  | 550.51 | 28.16 | 4 |
| 1   | -12 | 1  | 575.53 | 28.98 | 4 |
| 1   | -12 | 1  | 570.70 | 28.95 | 1 |
| 2   | -12 | 1  | 110.89 | 13.35 | 1 |
| -2  | 12  | -1 | 129.47 | 15.08 | 2 |
| 2   | -12 | 1  | 140.58 | 14.27 | 4 |
| 3   | -12 | 1  | 370.90 | 21.87 | 4 |
| 3   | -12 | 1  | 405.28 | 22.66 | 1 |
| -3  | 12  | -1 | 362.78 | 23.77 | 2 |
| -4  | 12  | -1 | 266.81 | 19.13 | 2 |
| 4   | -12 | 1  | 253.78 | 17.08 | 1 |
| 4   | -12 | 1  | 222.55 | 16.42 | 4 |
| 5   | -12 | 1  | 0.47   | 3.69  | 1 |
| -5  | 12  | -1 | 0.69   | 3.61  | 2 |
| -6  | 12  | -1 | 5.90   | 5.15  | 2 |
| 6   | -12 | 1  | 6.03   | 4.23  | 1 |
| 7   | -12 | 1  | 43.04  | 8.02  | 1 |
| -7  | 12  | -1 | 23.94  | 7.59  | 2 |
| -8  | 12  | -1 | -0.77  | 4.15  | 2 |
| 8   | -12 | 1  | 0.91   | 3.86  | 1 |
| -9  | 12  | -1 | -1.69  | 3.60  | 2 |
| -10 | 12  | -1 | 5.19   | 5.73  | 2 |
| -11 | 12  | -1 | -1.76  | 4.25  | 2 |
| -12 | 12  | -1 | 34.95  | 9.94  | 2 |
| -13 | 12  | -1 | 149.92 | 19.96 | 2 |
| -14 | 12  | -1 | 68.89  | 14.78 | 2 |
| -15 | 12  | -1 | 30.21  | 11.50 | 2 |
| -16 | 12  | -1 | 60.77  | 14.92 | 2 |
| -11 | -11 | 1  | 153.66 | 26.59 | 2 |
| -10 | -11 | 1  | 18.04  | 11.20 | 2 |
| -9  | -11 | 1  | 213.84 | 30.10 | 2 |
| -7  | -11 | 1  | -1.95  | 5.18  | 4 |
| -7  | -11 | 1  | -1.03  | 7.04  | 1 |

|     |     |    |        |       |   |
|-----|-----|----|--------|-------|---|
| -6  | -11 | 1  | 461.56 | 27.24 | 4 |
| -6  | -11 | 1  | 467.08 | 27.93 | 1 |
| -5  | -11 | 1  | 243.37 | 18.44 | 4 |
| -5  | -11 | 1  | 224.68 | 18.61 | 1 |
| -4  | -11 | 1  | 109.27 | 13.48 | 4 |
| -4  | -11 | 1  | 139.02 | 14.66 | 1 |
| -3  | -11 | 1  | 3.12   | 3.85  | 4 |
| -3  | -11 | 1  | 4.33   | 5.35  | 1 |
| -2  | -11 | 1  | 281.25 | 19.25 | 1 |
| -2  | -11 | 1  | 311.04 | 19.20 | 4 |
| -1  | -11 | 1  | 2.55   | 3.24  | 4 |
| -1  | -11 | 1  | -2.20  | 4.38  | 1 |
| 0   | -11 | 1  | 304.76 | 18.29 | 4 |
| 0   | -11 | 1  | 290.52 | 18.63 | 1 |
| 1   | -11 | 1  | 57.64  | 9.10  | 1 |
| 1   | -11 | 1  | 43.34  | 8.20  | 4 |
| -1  | 11  | -1 | 55.32  | 9.74  | 2 |
| 2   | -11 | 1  | 11.19  | 5.16  | 4 |
| 2   | -11 | 1  | 13.00  | 5.21  | 1 |
| -2  | 11  | -1 | 7.44   | 4.81  | 2 |
| 3   | -11 | 1  | 119.97 | 12.11 | 1 |
| -3  | 11  | -1 | 74.78  | 11.08 | 2 |
| 3   | -11 | 1  | 113.22 | 12.19 | 4 |
| -4  | 11  | -1 | 555.93 | 29.42 | 2 |
| 4   | -11 | 1  | 643.09 | 28.33 | 4 |
| 4   | -11 | 1  | 610.52 | 28.00 | 1 |
| -5  | 11  | -1 | 2.07   | 4.39  | 2 |
| 5   | -11 | 1  | -0.11  | 3.48  | 1 |
| -6  | 11  | -1 | 30.87  | 7.71  | 2 |
| 6   | -11 | 1  | 47.28  | 7.92  | 1 |
| -7  | 11  | -1 | 529.74 | 28.68 | 2 |
| 8   | -11 | 1  | 143.27 | 11.12 | 1 |
| -8  | 11  | -1 | 150.25 | 16.02 | 2 |
| -9  | 11  | -1 | 20.83  | 7.61  | 2 |
| -10 | 11  | -1 | 30.15  | 8.62  | 2 |
| -11 | 11  | -1 | 105.81 | 15.85 | 2 |
| -12 | 11  | -1 | 128.75 | 17.63 | 2 |
| -13 | 11  | -1 | 2.36   | 5.34  | 2 |
| -14 | 11  | -1 | 130.19 | 19.16 | 2 |
| -15 | 11  | -1 | -11.20 | 6.59  | 2 |
| -16 | 11  | -1 | 17.14  | 10.48 | 2 |
| -11 | -10 | 1  | 135.65 | 23.73 | 2 |
| -10 | -10 | 1  | -4.18  | 7.81  | 2 |
| -9  | -10 | 1  | 222.30 | 27.27 | 2 |
| -7  | -10 | 1  | 45.24  | 9.69  | 4 |
| -7  | -10 | 1  | 43.45  | 11.05 | 1 |

|     |     |    |        |       |   |
|-----|-----|----|--------|-------|---|
| -6  | -10 | 1  | 135.85 | 14.69 | 4 |
| -6  | -10 | 1  | 128.73 | 14.54 | 1 |
| -5  | -10 | 1  | 5.37   | 3.88  | 4 |
| -5  | -10 | 1  | 5.83   | 5.14  | 1 |
| -4  | -10 | 1  | 105.16 | 12.23 | 4 |
| -4  | -10 | 1  | 125.79 | 13.52 | 1 |
| -3  | -10 | 1  | 31.89  | 7.55  | 1 |
| -3  | -10 | 1  | 23.51  | 6.06  | 4 |
| -2  | -10 | 1  | 679.79 | 30.66 | 1 |
| -2  | -10 | 1  | 621.16 | 29.06 | 4 |
| -1  | -10 | 1  | 10.17  | 5.26  | 1 |
| -1  | -10 | 1  | 9.46   | 4.44  | 4 |
| 0   | -10 | 1  | 92.91  | 10.53 | 4 |
| 0   | -10 | 1  | 106.54 | 11.46 | 1 |
| 1   | -10 | 1  | 401.96 | 20.75 | 4 |
| 1   | -10 | 1  | 365.08 | 20.16 | 1 |
| -1  | 10  | -1 | 364.96 | 21.33 | 2 |
| 2   | -10 | 1  | 708.89 | 29.62 | 4 |
| -2  | 10  | -1 | 673.72 | 31.46 | 2 |
| 2   | -10 | 1  | 659.96 | 29.19 | 1 |
| 3   | -10 | 1  | 23.12  | 6.10  | 4 |
| 3   | -10 | 1  | 13.42  | 4.78  | 1 |
| -3  | 10  | -1 | 26.06  | 6.68  | 2 |
| 4   | -10 | 1  | 8.35   | 4.15  | 1 |
| -4  | 10  | -1 | 6.16   | 4.60  | 2 |
| 4   | -10 | 1  | 7.44   | 4.40  | 4 |
| 5   | -10 | 1  | 344.62 | 18.20 | 1 |
| -5  | 10  | -1 | 351.41 | 20.90 | 2 |
| 5   | -10 | 1  | 324.79 | 17.99 | 4 |
| 6   | -10 | 1  | 8.40   | 3.83  | 1 |
| -6  | 10  | -1 | 23.67  | 6.69  | 2 |
| -7  | 10  | -1 | 2.72   | 4.36  | 2 |
| 7   | -10 | 1  | 11.62  | 4.21  | 1 |
| -8  | 10  | -1 | 194.71 | 16.15 | 2 |
| 8   | -10 | 1  | 215.86 | 12.42 | 1 |
| -9  | 10  | -1 | 130.00 | 15.30 | 2 |
| -10 | 10  | -1 | 302.49 | 22.07 | 2 |
| -11 | 10  | -1 | 206.15 | 20.19 | 2 |
| -12 | 10  | -1 | 6.66   | 5.51  | 2 |
| -13 | 10  | -1 | 66.15  | 13.34 | 2 |
| -14 | 10  | -1 | 52.50  | 12.82 | 2 |
| -15 | 10  | -1 | 3.72   | 6.31  | 2 |
| -16 | 10  | -1 | 6.06   | 7.07  | 2 |
| -12 | -9  | 1  | -6.35  | 8.88  | 2 |
| -11 | -9  | 1  | 11.99  | 8.29  | 2 |
| -10 | -9  | 1  | -2.89  | 6.09  | 2 |

|     |    |    |         |       |   |
|-----|----|----|---------|-------|---|
| -9  | -9 | 1  | 60.84   | 12.86 | 2 |
| -7  | -9 | 1  | 145.88  | 15.07 | 1 |
| -7  | -9 | 1  | 157.18  | 15.14 | 4 |
| -6  | -9 | 1  | 14.46   | 5.80  | 1 |
| -6  | -9 | 1  | 10.52   | 4.41  | 4 |
| -5  | -9 | 1  | 205.29  | 15.76 | 1 |
| -5  | -9 | 1  | 196.37  | 14.70 | 4 |
| -4  | -9 | 1  | 578.24  | 26.93 | 4 |
| -4  | -9 | 1  | 551.98  | 27.32 | 1 |
| -3  | -9 | 1  | 232.59  | 16.10 | 1 |
| -3  | -9 | 1  | 247.67  | 15.94 | 4 |
| -2  | -9 | 1  | 326.12  | 18.91 | 1 |
| -2  | -9 | 1  | 311.07  | 18.13 | 4 |
| -1  | -9 | 1  | 2073.87 | 68.94 | 1 |
| -1  | -9 | 1  | 2083.49 | 68.54 | 4 |
| 0   | -9 | 1  | 1327.33 | 47.34 | 1 |
| 0   | -9 | 1  | 1300.65 | 46.86 | 4 |
| 1   | -9 | 1  | 197.83  | 13.42 | 1 |
| -1  | 9  | -1 | 207.79  | 14.47 | 2 |
| 1   | -9 | 1  | 185.41  | 12.90 | 4 |
| -2  | 9  | -1 | 4.53    | 3.50  | 2 |
| 2   | -9 | 1  | 5.64    | 3.15  | 1 |
| 2   | -9 | 1  | -0.22   | 2.96  | 4 |
| -3  | 9  | -1 | 5.05    | 3.97  | 2 |
| 3   | -9 | 1  | 8.86    | 4.07  | 1 |
| 3   | -9 | 1  | 0.74    | 3.09  | 4 |
| -4  | 9  | -1 | 155.39  | 8.86  | 3 |
| 4   | -9 | 1  | 135.99  | 10.73 | 4 |
| 4   | -9 | 1  | 147.86  | 11.00 | 1 |
| -4  | 9  | -1 | 149.74  | 12.51 | 2 |
| 5   | -9 | 1  | 1190.42 | 42.13 | 4 |
| 5   | -9 | 1  | 1222.07 | 42.47 | 1 |
| -5  | 9  | -1 | 1233.24 | 40.18 | 3 |
| -5  | 9  | -1 | 1203.30 | 46.40 | 2 |
| -6  | 9  | -1 | 44.54   | 5.88  | 3 |
| 6   | -9 | 1  | 44.32   | 6.32  | 1 |
| -6  | 9  | -1 | 30.62   | 7.16  | 2 |
| 7   | -9 | 1  | 49.76   | 6.17  | 1 |
| -7  | 9  | -1 | 42.02   | 6.37  | 3 |
| -7  | 9  | -1 | 31.20   | 7.56  | 2 |
| -8  | 9  | -1 | 10.03   | 5.04  | 2 |
| -8  | 9  | -1 | 7.61    | 3.99  | 3 |
| -9  | 9  | -1 | 26.01   | 6.50  | 3 |
| -9  | 9  | -1 | 31.88   | 8.58  | 2 |
| -10 | 9  | -1 | 177.14  | 16.04 | 2 |
| -11 | 9  | -1 | 6.06    | 5.31  | 3 |



-11 9 -1 10.33 5.65 2  
-12 9 -1 413.30 26.76 2  
-12 9 -1 367.88 24.46 3  
-13 9 -1 30.89 9.00 2  
-13 9 -1 33.58 9.74 3  
-14 9 -1 59.93 13.52 2  
-14 9 -1 55.21 12.27 3  
-15 9 -1 -1.32 5.47 2  
-15 9 -1 0.53 7.11 3  
-16 9 -1 1.79 7.76 2  
-16 9 -1 2.36 7.81 3  
-12 -8 1 11.03 7.37 2  
-11 -8 1 6.19 7.58 2  
-10 -8 1 166.98 21.49 2  
-9 -8 1 23.14 8.87 2  
-7 -8 1 71.49 10.61 1  
-7 -8 1 86.72 10.69 4  
-6 -8 1 90.79 10.81 4  
-6 -8 1 71.83 10.40 1  
-5 -8 1 445.86 23.41 1  
-5 -8 1 466.71 23.24 4  
-4 -8 1 328.65 18.32 4  
-4 -8 1 307.59 18.34 1  
-3 -8 1 303.19 17.12 4  
-3 -8 1 299.59 17.54 1  
-2 -8 1 94.89 9.72 4  
-2 -8 1 68.03 8.66 1  
-1 -8 1 894.46 33.93 1  
-1 -8 1 844.71 33.00 4  
0 8 -1 111.55 9.89 2  
0 -8 1 123.29 9.88 4  
0 -8 1 130.02 10.30 1  
1 -8 1 310.51 16.66 1  
-1 8 -1 342.82 18.52 2  
1 -8 1 340.54 17.26 4  
-2 8 -1 4.73 3.00 2  
2 -8 1 7.81 3.53 4  
2 -8 1 10.73 3.64 1  
3 -8 1 3.16 2.24 1  
-3 8 -1 -0.75 2.36 2  
3 -8 1 1.20 2.13 4  
-4 8 -1 170.89 12.44 2  
-4 8 -1 166.00 8.73 3  
4 -8 1 156.58 10.56 4  
4 -8 1 146.97 10.22 1  
-5 8 -1 15.22 3.59 3

|     |    |    |         |       |   |
|-----|----|----|---------|-------|---|
| 5   | -8 | 1  | -0.56   | 1.84  | 1 |
| -5  | 8  | -1 | 17.60   | 5.42  | 2 |
| 5   | -8 | 1  | -1.27   | 1.94  | 4 |
| -6  | 8  | -1 | 290.18  | 18.21 | 2 |
| 6   | -8 | 1  | 273.65  | 13.93 | 1 |
| -6  | 8  | -1 | 299.57  | 14.70 | 3 |
| 7   | -8 | 1  | 0.26    | 2.26  | 1 |
| -7  | 8  | -1 | -1.06   | 3.51  | 2 |
| -7  | 8  | -1 | 1.24    | 2.78  | 3 |
| -8  | 8  | -1 | 695.15  | 28.97 | 3 |
| -8  | 8  | -1 | 657.32  | 31.90 | 2 |
| -10 | 8  | -1 | 26.16   | 7.12  | 3 |
| -10 | 8  | -1 | 17.45   | 6.22  | 2 |
| -11 | 8  | -1 | 1028.00 | 43.11 | 3 |
| -11 | 8  | -1 | 948.40  | 44.78 | 2 |
| -12 | 8  | -1 | 197.69  | 17.65 | 3 |
| -12 | 8  | -1 | 189.62  | 19.14 | 2 |
| -13 | 8  | -1 | 283.34  | 22.23 | 2 |
| -13 | 8  | -1 | 258.36  | 21.18 | 3 |
| -14 | 8  | -1 | 8.93    | 8.04  | 3 |
| -14 | 8  | -1 | 3.45    | 5.65  | 2 |
| -15 | 8  | -1 | 28.89   | 9.62  | 2 |
| -15 | 8  | -1 | 25.37   | 11.04 | 3 |
| -16 | 8  | -1 | 5.78    | 7.21  | 2 |
| -16 | 8  | -1 | 6.38    | 8.72  | 3 |
| -17 | 8  | -1 | 8.15    | 8.41  | 2 |
| -17 | 8  | -1 | 18.99   | 9.97  | 3 |
| -12 | -7 | 1  | 19.25   | 8.70  | 2 |
| -11 | -7 | 1  | 37.79   | 10.27 | 2 |
| -10 | -7 | 1  | 198.61  | 21.81 | 2 |
| -9  | -7 | 1  | 0.55    | 4.71  | 2 |
| -8  | -7 | 1  | 10.54   | 4.96  | 4 |
| -8  | -7 | 1  | 14.07   | 6.39  | 2 |
| -8  | -7 | 1  | 14.14   | 6.51  | 1 |
| -7  | -7 | 1  | 24.52   | 6.26  | 4 |
| -7  | -7 | 1  | 27.90   | 7.27  | 1 |
| -6  | -7 | 1  | 133.16  | 12.31 | 1 |
| -6  | -7 | 1  | 125.05  | 11.81 | 4 |
| -5  | -7 | 1  | 0.88    | 4.13  | 1 |
| -5  | -7 | 1  | 10.11   | 4.83  | 4 |
| 3   | 7  | -1 | 251.79  | 15.34 | 1 |
| 2   | 7  | -1 | 143.05  | 11.05 | 1 |
| 1   | 7  | -1 | 49.81   | 6.99  | 1 |
| 0   | 7  | -1 | 398.90  | 18.67 | 1 |
| 0   | 7  | -1 | 394.61  | 19.46 | 2 |
| -1  | 7  | -1 | 1542.52 | 52.46 | 2 |

|     |    |    |         |       |   |
|-----|----|----|---------|-------|---|
| -2  | 7  | -1 | 651.59  | 26.60 | 2 |
| 2   | -7 | 1  | 649.11  | 24.85 | 1 |
| 2   | -7 | 1  | 590.77  | 24.28 | 4 |
| 3   | -7 | 1  | 47.63   | 5.93  | 4 |
| -3  | 7  | -1 | 37.76   | 6.39  | 2 |
| -3  | 7  | -1 | 43.32   | 4.02  | 3 |
| 3   | -7 | 1  | 38.14   | 5.37  | 1 |
| -4  | 7  | -1 | 799.26  | 33.83 | 2 |
| 4   | -7 | 1  | 897.47  | 31.24 | 4 |
| -4  | 7  | -1 | 969.32  | 30.14 | 3 |
| 4   | -7 | 1  | 881.90  | 31.17 | 1 |
| -5  | 7  | -1 | 67.48   | 6.00  | 3 |
| -5  | 7  | -1 | 68.25   | 8.72  | 2 |
| 5   | -7 | 1  | 63.48   | 6.41  | 1 |
| 5   | -7 | 1  | 69.64   | 6.70  | 4 |
| -6  | 7  | -1 | 288.51  | 17.53 | 2 |
| -6  | 7  | -1 | 302.96  | 14.84 | 3 |
| 6   | -7 | 1  | 289.28  | 13.29 | 1 |
| -7  | 7  | -1 | 57.83   | 9.08  | 2 |
| -7  | 7  | -1 | 68.96   | 7.84  | 3 |
| 7   | -7 | 1  | 64.27   | 5.46  | 1 |
| -8  | 7  | -1 | 12.92   | 5.51  | 2 |
| -9  | 7  | -1 | 1159.11 | 44.42 | 3 |
| -9  | 7  | -1 | 1105.51 | 46.38 | 2 |
| -10 | 7  | -1 | 154.11  | 16.03 | 2 |
| -10 | 7  | -1 | 155.46  | 13.72 | 3 |
| -11 | 7  | -1 | 627.11  | 31.69 | 3 |
| -11 | 7  | -1 | 605.23  | 32.84 | 2 |
| -12 | 7  | -1 | 6.50    | 6.22  | 3 |
| -12 | 7  | -1 | 1.78    | 3.92  | 2 |
| -13 | 7  | -1 | 95.05   | 14.47 | 3 |
| -13 | 7  | -1 | 85.82   | 14.35 | 2 |
| -14 | 7  | -1 | 130.45  | 17.39 | 3 |
| -14 | 7  | -1 | 99.51   | 16.40 | 2 |
| -15 | 7  | -1 | 298.61  | 24.47 | 2 |
| -15 | 7  | -1 | 292.88  | 24.94 | 3 |
| -16 | 7  | -1 | -5.01   | 6.70  | 3 |
| -16 | 7  | -1 | 1.99    | 6.40  | 2 |
| -17 | 7  | -1 | 14.17   | 9.09  | 2 |
| -17 | 7  | -1 | -8.36   | 6.31  | 3 |
| -12 | -6 | 1  | 51.76   | 12.42 | 2 |
| -11 | -6 | 1  | 15.42   | 7.12  | 2 |
| -10 | -6 | 1  | -8.72   | 3.32  | 2 |
| -9  | -6 | 1  | 7.38    | 5.30  | 2 |
| -8  | -6 | 1  | 156.10  | 12.36 | 4 |
| -8  | -6 | 1  | 168.25  | 13.59 | 1 |

|     |    |    |         |       |   |
|-----|----|----|---------|-------|---|
| -8  | -6 | 1  | 171.33  | 15.28 | 2 |
| -7  | -6 | 1  | 30.32   | 6.41  | 4 |
| -7  | -6 | 1  | 28.57   | 6.58  | 1 |
| -6  | -6 | 1  | 627.89  | 26.27 | 4 |
| -6  | -6 | 1  | 613.96  | 26.60 | 1 |
| 4   | 6  | -1 | 127.63  | 10.18 | 1 |
| 3   | 6  | -1 | 254.72  | 14.19 | 1 |
| 2   | 6  | -1 | 2.02    | 2.54  | 1 |
| 1   | 6  | -1 | 673.32  | 26.22 | 1 |
| 0   | 6  | -1 | 310.24  | 15.56 | 2 |
| 0   | 6  | -1 | 313.08  | 15.04 | 1 |
| -1  | 6  | -1 | 76.90   | 6.97  | 2 |
| -1  | 6  | -1 | 75.62   | 6.63  | 1 |
| -2  | 6  | -1 | 2.06    | 2.54  | 2 |
| -3  | 6  | -1 | 829.91  | 31.62 | 2 |
| -3  | 6  | -1 | 824.85  | 26.81 | 3 |
| 3   | -6 | 1  | 845.37  | 28.97 | 1 |
| 3   | -6 | 1  | 840.31  | 28.85 | 4 |
| -4  | 6  | -1 | 391.84  | 18.94 | 2 |
| -4  | 6  | -1 | 374.34  | 15.13 | 3 |
| 5   | -6 | 1  | 235.25  | 11.05 | 1 |
| -5  | 6  | -1 | 232.34  | 14.09 | 2 |
| -5  | 6  | -1 | 225.50  | 11.66 | 3 |
| -6  | 6  | -1 | 339.80  | 17.17 | 3 |
| -6  | 6  | -1 | 408.22  | 20.58 | 2 |
| 6   | -6 | 1  | 426.86  | 15.45 | 1 |
| -7  | 6  | -1 | 604.34  | 27.63 | 2 |
| -7  | 6  | -1 | 565.89  | 24.34 | 3 |
| 7   | -6 | 1  | 549.13  | 19.62 | 1 |
| -8  | 6  | -1 | 480.09  | 23.17 | 3 |
| -8  | 6  | -1 | 520.84  | 26.32 | 2 |
| -9  | 6  | -1 | 1811.46 | 62.38 | 3 |
| -9  | 6  | -1 | 1729.66 | 64.75 | 2 |
| -10 | 6  | -1 | 78.49   | 10.42 | 3 |
| -10 | 6  | -1 | 64.94   | 10.91 | 2 |
| -11 | 6  | -1 | 182.41  | 16.16 | 2 |
| -11 | 6  | -1 | 190.20  | 16.06 | 3 |
| -12 | 6  | -1 | 10.17   | 5.74  | 2 |
| -12 | 6  | -1 | 7.28    | 6.12  | 3 |
| -13 | 6  | -1 | 151.76  | 17.57 | 2 |
| -13 | 6  | -1 | 175.45  | 18.22 | 3 |
| -14 | 6  | -1 | 3.09    | 7.05  | 3 |
| -14 | 6  | -1 | 1.64    | 5.23  | 2 |
| -15 | 6  | -1 | 4.49    | 7.41  | 3 |
| -15 | 6  | -1 | 6.11    | 6.65  | 2 |
| -16 | 6  | -1 | 217.87  | 23.60 | 2 |

|     |    |    |         |        |   |
|-----|----|----|---------|--------|---|
| -16 | 6  | -1 | 259.62  | 25.56  | 3 |
| -17 | 6  | -1 | 8.01    | 9.31   | 3 |
| -13 | -5 | 1  | 24.79   | 9.31   | 2 |
| -12 | -5 | 1  | 63.37   | 12.87  | 2 |
| -11 | -5 | 1  | -4.55   | 4.24   | 2 |
| -10 | -5 | 1  | 38.52   | 8.95   | 2 |
| -9  | -5 | 1  | -0.41   | 3.70   | 2 |
| -8  | -5 | 1  | 10.77   | 4.21   | 4 |
| -8  | -5 | 1  | 9.37    | 4.78   | 1 |
| -8  | -5 | 1  | 8.85    | 4.32   | 2 |
| -7  | -5 | 1  | 74.67   | 8.14   | 4 |
| -7  | -5 | 1  | 60.39   | 9.84   | 2 |
| -7  | -5 | 1  | 66.46   | 8.06   | 1 |
| 6   | 5  | -1 | 144.44  | 10.58  | 1 |
| 5   | 5  | -1 | 71.57   | 7.69   | 1 |
| 4   | 5  | -1 | 380.85  | 17.93  | 1 |
| 3   | 5  | -1 | 272.15  | 14.11  | 1 |
| 2   | 5  | -1 | 1.10    | 1.92   | 1 |
| 1   | 5  | -1 | 4517.94 | 130.14 | 1 |
| 0   | 5  | -1 | 5940.49 | 171.68 | 2 |
| 0   | 5  | -1 | 5866.11 | 167.29 | 1 |
| -1  | 5  | -1 | 1002.53 | 34.00  | 1 |
| -1  | 5  | -1 | 1064.02 | 35.66  | 2 |
| -2  | 5  | -1 | 333.95  | 15.31  | 2 |
| -2  | 5  | -1 | 327.58  | 14.15  | 1 |
| -2  | 5  | -1 | 350.68  | 11.88  | 3 |
| -3  | 5  | -1 | 358.28  | 13.14  | 3 |
| -3  | 5  | -1 | 323.29  | 15.90  | 2 |
| -4  | 5  | -1 | 292.66  | 12.66  | 3 |
| 4   | -5 | 1  | 295.99  | 12.09  | 1 |
| 4   | -5 | 1  | 297.12  | 12.12  | 4 |
| -4  | 5  | -1 | 283.42  | 14.89  | 2 |
| -5  | 5  | -1 | 277.36  | 15.22  | 2 |
| 5   | -5 | 1  | 263.83  | 10.93  | 1 |
| 6   | -5 | 1  | 250.68  | 10.05  | 1 |
| -6  | 5  | -1 | 258.47  | 15.41  | 2 |
| -7  | 5  | -1 | 1075.09 | 41.90  | 2 |
| -8  | 5  | -1 | 355.70  | 20.43  | 2 |
| -9  | 5  | -1 | 149.69  | 13.30  | 2 |
| -10 | 5  | -1 | 67.70   | 10.76  | 2 |
| -11 | 5  | -1 | 12.25   | 5.91   | 2 |
| -12 | 5  | -1 | 99.24   | 13.97  | 2 |
| -13 | 5  | -1 | 158.05  | 17.87  | 3 |
| -13 | 5  | -1 | 158.00  | 17.88  | 2 |
| -14 | 5  | -1 | 11.75   | 6.87   | 2 |
| -14 | 5  | -1 | 18.54   | 8.60   | 3 |

|     |    |    |         |       |   |
|-----|----|----|---------|-------|---|
| -15 | 5  | -1 | 36.22   | 11.40 | 3 |
| -15 | 5  | -1 | 35.50   | 9.98  | 2 |
| -16 | 5  | -1 | 7.78    | 8.28  | 3 |
| -16 | 5  | -1 | 26.28   | 9.80  | 2 |
| -17 | 5  | -1 | 13.16   | 9.21  | 3 |
| -13 | -4 | 1  | 125.10  | 17.57 | 2 |
| -12 | -4 | 1  | 122.67  | 16.40 | 2 |
| -11 | -4 | 1  | 1.62    | 3.45  | 2 |
| -10 | -4 | 1  | 52.16   | 9.91  | 2 |
| -9  | -4 | 1  | 24.28   | 6.89  | 2 |
| -8  | -4 | 1  | 563.22  | 28.23 | 2 |
| -8  | -4 | 1  | 535.43  | 23.18 | 1 |
| -7  | -4 | 1  | 547.92  | 26.56 | 2 |
| -6  | -4 | 1  | -1.13   | 2.15  | 2 |
| 6   | 4  | -1 | 0.89    | 2.70  | 1 |
| 5   | 4  | -1 | 1.92    | 1.90  | 1 |
| 4   | 4  | -1 | 5.87    | 2.77  | 1 |
| 3   | 4  | -1 | 616.55  | 23.13 | 1 |
| 2   | 4  | -1 | 206.04  | 10.60 | 1 |
| 1   | 4  | -1 | 1323.49 | 41.72 | 1 |
| 0   | 4  | -1 | 32.01   | 3.95  | 1 |
| 0   | 4  | -1 | 38.07   | 4.38  | 2 |
| -1  | 4  | -1 | 1817.23 | 59.10 | 2 |
| -1  | 4  | -1 | 2055.49 | 57.72 | 1 |
| -2  | 4  | -1 | 939.62  | 29.72 | 1 |
| -2  | 4  | -1 | 911.00  | 28.20 | 3 |
| -2  | 4  | -1 | 940.14  | 31.94 | 2 |
| -3  | 4  | -1 | 351.34  | 13.40 | 3 |
| -3  | 4  | -1 | 361.98  | 15.75 | 2 |
| 4   | -4 | 1  | 14.32   | 2.34  | 1 |
| -4  | 4  | -1 | 10.04   | 3.35  | 2 |
| 4   | -4 | 1  | 17.90   | 2.58  | 4 |
| -5  | 4  | -1 | 18.04   | 4.37  | 2 |
| 5   | -4 | 1  | 19.71   | 2.34  | 1 |
| -6  | 4  | -1 | 113.91  | 9.67  | 2 |
| -7  | 4  | -1 | 805.11  | 33.19 | 2 |
| -8  | 4  | -1 | 147.01  | 12.42 | 2 |
| -9  | 4  | -1 | 76.38   | 10.56 | 2 |
| -10 | 4  | -1 | 26.40   | 7.20  | 2 |
| -11 | 4  | -1 | 66.88   | 10.90 | 2 |
| -12 | 4  | -1 | 1.88    | 3.87  | 2 |
| -13 | 4  | -1 | 23.16   | 7.61  | 2 |
| -14 | 4  | -1 | 72.43   | 14.41 | 3 |
| -14 | 4  | -1 | 112.29  | 16.07 | 2 |
| -15 | 4  | -1 | 14.09   | 8.99  | 3 |
| -15 | 4  | -1 | 4.78    | 6.57  | 2 |

|     |    |    |         |       |   |
|-----|----|----|---------|-------|---|
| -16 | 4  | -1 | 73.60   | 14.76 | 2 |
| -16 | 4  | -1 | 73.56   | 15.39 | 3 |
| -13 | -3 | 1  | 112.96  | 16.26 | 2 |
| -12 | -3 | 1  | 85.41   | 13.11 | 2 |
| -11 | -3 | 1  | 101.43  | 13.87 | 2 |
| -10 | -3 | 1  | 242.12  | 17.53 | 2 |
| -9  | -3 | 1  | 273.22  | 18.47 | 2 |
| -8  | -3 | 1  | 7.47    | 4.07  | 2 |
| -7  | -3 | 1  | 1226.86 | 46.72 | 2 |
| 7   | 3  | -1 | 1283.15 | 41.75 | 1 |
| -6  | -3 | 1  | 11.96   | 3.87  | 2 |
| 6   | 3  | -1 | 3.34    | 2.83  | 1 |
| 5   | 3  | -1 | 80.45   | 6.52  | 1 |
| 4   | 3  | -1 | -0.28   | 1.42  | 1 |
| 3   | 3  | -1 | 308.44  | 13.21 | 1 |
| 2   | 3  | -1 | 301.17  | 12.51 | 1 |
| 1   | 3  | -1 | 145.98  | 7.56  | 1 |
| 0   | 3  | -1 | 662.78  | 23.25 | 2 |
| 0   | 3  | -1 | 739.40  | 23.06 | 1 |
| -1  | 3  | -1 | 6.99    | 1.91  | 2 |
| -1  | 3  | -1 | 6.88    | 1.74  | 1 |
| -2  | 3  | -1 | 75.07   | 4.45  | 1 |
| -2  | 3  | -1 | 83.79   | 5.77  | 2 |
| -3  | 3  | -1 | 434.15  | 17.73 | 2 |
| -4  | 3  | -1 | 15.63   | 3.64  | 2 |
| 4   | -3 | 1  | 14.77   | 1.82  | 1 |
| -5  | 3  | -1 | 759.43  | 29.52 | 2 |
| -6  | 3  | -1 | 937.90  | 35.82 | 2 |
| -7  | 3  | -1 | 5.67    | 3.68  | 2 |
| -8  | 3  | -1 | 121.84  | 11.84 | 2 |
| -9  | 3  | -1 | 375.61  | 21.33 | 2 |
| -10 | 3  | -1 | 309.17  | 19.77 | 2 |
| -11 | 3  | -1 | 47.04   | 9.78  | 2 |
| -12 | 3  | -1 | 10.69   | 5.86  | 2 |
| -13 | 3  | -1 | 11.21   | 5.56  | 2 |
| -14 | 3  | -1 | 28.39   | 9.33  | 2 |
| -15 | 3  | -1 | 29.82   | 10.03 | 2 |
| -15 | 3  | -1 | 41.79   | 12.21 | 3 |
| -16 | 3  | -1 | 4.67    | 6.16  | 2 |
| -16 | 3  | -1 | -6.38   | 5.85  | 3 |
| -16 | -2 | 1  | 165.32  | 24.43 | 3 |
| -13 | -2 | 1  | 21.47   | 7.65  | 2 |
| -12 | -2 | 1  | 144.89  | 16.44 | 2 |
| -11 | -2 | 1  | 115.35  | 13.55 | 2 |
| -10 | -2 | 1  | 243.68  | 17.23 | 2 |
| -9  | -2 | 1  | 50.90   | 8.76  | 2 |

|     |    |    |         |       |   |
|-----|----|----|---------|-------|---|
| 8   | 2  | -1 | 43.63   | 5.35  | 1 |
| -8  | -2 | 1  | 42.35   | 7.53  | 2 |
| 7   | 2  | -1 | 575.95  | 21.43 | 1 |
| -7  | -2 | 1  | 578.58  | 25.56 | 2 |
| 6   | 2  | -1 | 119.14  | 7.59  | 1 |
| -6  | -2 | 1  | 135.49  | 9.98  | 2 |
| -5  | -2 | 1  | 1.77    | 1.96  | 2 |
| 5   | 2  | -1 | 0.19    | 1.56  | 1 |
| 4   | 2  | -1 | 327.44  | 13.41 | 1 |
| -4  | -2 | 1  | 341.02  | 15.06 | 2 |
| 2   | 2  | -1 | 1406.22 | 42.00 | 1 |
| 1   | 2  | -1 | 104.31  | 5.36  | 1 |
| 0   | 2  | -1 | 685.98  | 21.96 | 1 |
| 0   | 2  | -1 | 737.97  | 22.58 | 2 |
| -1  | 2  | -1 | 6.97    | 1.34  | 1 |
| -1  | 2  | -1 | 12.37   | 1.99  | 2 |
| -2  | 2  | -1 | 1878.24 | 56.77 | 2 |
| -3  | 2  | -1 | 358.01  | 15.01 | 2 |
| -4  | 2  | -1 | 420.53  | 17.89 | 2 |
| -5  | 2  | -1 | 1018.45 | 36.56 | 2 |
| -6  | 2  | -1 | 11.62   | 3.96  | 2 |
| -7  | 2  | -1 | 395.71  | 20.24 | 2 |
| -8  | 2  | -1 | 4.53    | 3.46  | 2 |
| -9  | 2  | -1 | 63.06   | 9.80  | 2 |
| -10 | 2  | -1 | 415.52  | 23.63 | 2 |
| -11 | 2  | -1 | 104.46  | 13.21 | 2 |
| -12 | 2  | -1 | 7.30    | 4.59  | 2 |
| -13 | 2  | -1 | 10.91   | 5.52  | 2 |
| -14 | 2  | -1 | 25.83   | 8.72  | 2 |
| -15 | 2  | -1 | 26.32   | 8.79  | 2 |
| -16 | 2  | -1 | -0.79   | 6.51  | 3 |
| -16 | 2  | -1 | 21.81   | 9.74  | 2 |
| -16 | -1 | 1  | 18.10   | 10.38 | 3 |
| -15 | -1 | 1  | 18.32   | 8.63  | 3 |
| -14 | -1 | 1  | 75.23   | 13.64 | 2 |
| -13 | -1 | 1  | 2.11    | 4.56  | 2 |
| -12 | -1 | 1  | 467.57  | 26.90 | 2 |
| -11 | -1 | 1  | 70.37   | 11.32 | 2 |
| -10 | -1 | 1  | 22.48   | 6.46  | 2 |
| -9  | -1 | 1  | 355.57  | 19.81 | 2 |
| -8  | -1 | 1  | 374.33  | 19.73 | 2 |
| 8   | 1  | -1 | 380.15  | 15.10 | 1 |
| 7   | 1  | -1 | 929.03  | 29.82 | 1 |
| -7  | -1 | 1  | 910.66  | 34.95 | 2 |
| -6  | -1 | 1  | 3.23    | 2.38  | 2 |
| 6   | 1  | -1 | 1.17    | 1.53  | 1 |



|     |    |    |         |       |   |
|-----|----|----|---------|-------|---|
| 5   | 1  | -1 | 1988.71 | 58.43 | 1 |
| -5  | -1 | 1  | 2009.22 | 62.80 | 2 |
| 4   | 1  | -1 | 21.09   | 2.61  | 1 |
| -4  | -1 | 1  | 16.59   | 3.33  | 2 |
| -3  | -1 | 1  | 61.02   | 4.44  | 2 |
| 3   | 1  | -1 | 48.93   | 3.67  | 1 |
| 2   | 1  | -1 | 0.46    | 0.59  | 1 |
| 1   | 1  | -1 | 291.63  | 10.03 | 1 |
| -1  | 1  | -1 | 971.13  | 29.77 | 2 |
| -2  | 1  | -1 | 248.03  | 10.50 | 2 |
| -3  | 1  | -1 | 51.59   | 5.06  | 2 |
| -4  | 1  | -1 | 8.70    | 2.91  | 2 |
| -5  | 1  | -1 | 4.85    | 2.47  | 2 |
| -6  | 1  | -1 | 20.25   | 4.73  | 2 |
| -7  | 1  | -1 | 254.37  | 15.35 | 2 |
| -8  | 1  | -1 | 85.27   | 10.13 | 2 |
| -9  | 1  | -1 | 47.68   | 8.68  | 2 |
| -10 | 1  | -1 | 65.73   | 10.52 | 2 |
| -11 | 1  | -1 | 7.20    | 4.81  | 2 |
| -12 | 1  | -1 | 195.46  | 16.99 | 2 |
| -13 | 1  | -1 | 36.37   | 9.76  | 2 |
| -14 | 1  | -1 | 8.83    | 6.18  | 2 |
| -15 | 1  | -1 | 33.68   | 10.67 | 2 |
| -16 | 1  | -1 | 126.59  | 19.54 | 2 |
| -16 | 0  | 1  | 4.92    | 6.02  | 3 |
| -15 | 0  | 1  | 0.34    | 6.45  | 3 |
| -14 | 0  | 1  | 152.21  | 17.44 | 2 |
| -13 | 0  | 1  | 224.26  | 18.35 | 2 |
| -12 | 0  | 1  | 261.51  | 18.96 | 2 |
| -11 | 0  | 1  | 1.86    | 3.28  | 2 |
| -10 | 0  | 1  | 16.75   | 5.70  | 2 |
| -9  | 0  | 1  | 91.68   | 10.40 | 2 |
| -8  | 0  | 1  | 8.46    | 3.60  | 2 |
| -7  | 0  | 1  | 547.25  | 23.58 | 2 |
| 7   | 0  | -1 | 543.00  | 18.50 | 1 |
| 6   | 0  | -1 | 102.79  | 5.49  | 1 |
| -6  | 0  | 1  | 97.91   | 7.69  | 2 |
| -5  | 0  | 1  | 983.35  | 33.70 | 2 |
| 5   | 0  | -1 | 983.01  | 29.77 | 1 |
| 4   | 0  | -1 | 450.82  | 14.75 | 1 |
| -4  | 0  | 1  | 450.33  | 17.21 | 2 |
| 3   | 0  | -1 | 4.27    | 1.24  | 1 |
| -3  | 0  | 1  | 2.07    | 1.30  | 2 |
| -2  | 0  | 1  | 340.29  | 12.47 | 3 |
| -1  | 0  | -1 | 1253.06 | 37.80 | 2 |
| -2  | 0  | -1 | 2.71    | 1.32  | 2 |

-3 0 -1 1.10 1.50 2  
-4 0 -1 656.81 24.86 2  
-5 0 -1 32.33 5.46 2  
-6 0 -1 0.03 1.98 2  
-7 0 -1 917.56 36.35 2  
-8 0 -1 281.08 17.33 2  
-9 0 -1 107.44 12.43 2  
-10 0 -1 167.90 14.47 2  
-11 0 -1 6.49 4.58 2  
-12 0 -1 80.88 13.24 2  
-13 0 -1 55.10 11.74 2  
-14 0 -1 -1.93 6.23 2  
-15 0 -1 4.19 6.19 2  
-16 1 1 3.37 7.02 3  
-15 1 1 33.77 11.17 3  
-14 1 1 218.58 22.14 3  
-14 1 1 207.72 18.09 2  
-13 1 1 7.47 5.34 2  
-12 1 1 347.43 21.80 2  
-11 1 1 149.64 13.28 2  
-10 1 1 83.95 10.76 2  
-9 1 1 44.66 7.75 2  
-8 1 1 78.88 8.82 2  
-7 1 1 40.76 6.24 2  
6 -1 -1 1214.60 36.46 1  
-6 1 1 1279.35 42.64 2  
5 -1 -1 128.88 5.78 1  
-5 1 1 137.56 8.46 2  
-4 1 1 1644.17 50.71 2  
4 -1 -1 1626.54 47.04 1  
-3 1 1 128.67 6.56 2  
3 -1 -1 119.52 5.29 1  
-3 1 1 126.41 6.93 3  
-2 1 1 6837.88 193.87 2  
-2 1 1 6868.28 193.90 3  
1 -1 -1 1.76 0.70 1  
-1 1 1 0.47 0.62 3  
0 -1 -1 80.24 4.03 1  
-1 -1 -1 9998.75 275.16 1  
-2 -1 -1 6.89 2.12 2  
-2 -1 -1 6.17 1.69 1  
-3 -1 -1 76.33 4.72 1  
-3 -1 -1 82.58 6.30 2  
-4 -1 -1 46.22 4.02 1  
-4 -1 -1 49.44 6.29 2  
-5 -1 -1 466.64 20.96 2

|     |    |    |         |        |   |
|-----|----|----|---------|--------|---|
| -5  | -1 | -1 | 464.73  | 16.35  | 1 |
| -6  | -1 | -1 | 815.09  | 32.39  | 2 |
| -6  | -1 | -1 | 781.49  | 25.63  | 1 |
| -7  | -1 | -1 | 603.69  | 27.22  | 2 |
| -7  | -1 | -1 | 585.43  | 20.48  | 1 |
| -8  | -1 | -1 | 48.09   | 8.57   | 2 |
| -9  | -1 | -1 | 139.24  | 14.09  | 2 |
| -10 | -1 | -1 | 48.37   | 9.52   | 2 |
| -11 | -1 | -1 | 109.93  | 14.76  | 2 |
| -12 | -1 | -1 | -0.72   | 4.02   | 2 |
| -13 | -1 | -1 | 0.82    | 5.53   | 2 |
| -14 | -1 | -1 | 347.75  | 26.31  | 2 |
| -15 | -1 | -1 | 25.36   | 9.64   | 2 |
| -17 | 2  | 1  | 2.08    | 5.84   | 3 |
| -16 | 2  | 1  | 4.81    | 7.09   | 3 |
| -15 | 2  | 1  | 113.59  | 17.74  | 3 |
| -14 | 2  | 1  | 13.08   | 7.69   | 3 |
| -14 | 2  | 1  | -4.11   | 3.90   | 2 |
| -13 | 2  | 1  | 164.36  | 17.39  | 2 |
| -13 | 2  | 1  | 157.67  | 17.92  | 3 |
| -12 | 2  | 1  | 70.81   | 11.11  | 2 |
| -12 | 2  | 1  | 63.60   | 11.98  | 3 |
| -11 | 2  | 1  | 10.38   | 5.17   | 2 |
| -10 | 2  | 1  | 0.20    | 2.91   | 2 |
| -9  | 2  | 1  | 112.47  | 10.94  | 2 |
| -8  | 2  | 1  | 2697.60 | 86.11  | 2 |
| -7  | 2  | 1  | 39.66   | 6.14   | 2 |
| -6  | 2  | 1  | 954.61  | 34.85  | 2 |
| 6   | -2 | -1 | 991.41  | 29.40  | 1 |
| -5  | 2  | 1  | 128.37  | 8.42   | 2 |
| -5  | 2  | 1  | 118.40  | 8.45   | 3 |
| 5   | -2 | -1 | 140.04  | 6.16   | 1 |
| 4   | -2 | -1 | 1705.97 | 48.84  | 1 |
| -4  | 2  | 1  | 1685.14 | 52.38  | 2 |
| -4  | 2  | 1  | 1662.27 | 52.86  | 3 |
| 3   | -2 | -1 | 4274.12 | 120.25 | 1 |
| -3  | 2  | 1  | 4344.45 | 124.27 | 2 |
| -3  | 2  | 1  | 4312.93 | 124.39 | 3 |
| -2  | 2  | 1  | 2088.76 | 61.23  | 3 |
| -2  | 2  | 1  | 2067.15 | 61.24  | 2 |
| -1  | 2  | 1  | 1788.23 | 53.71  | 2 |
| 1   | -2 | -1 | 1845.13 | 52.59  | 1 |
| 0   | -2 | -1 | 264.82  | 10.32  | 1 |
| -1  | -2 | -1 | 194.61  | 8.71   | 1 |
| -2  | -2 | -1 | 269.45  | 11.16  | 1 |
| -3  | -2 | -1 | 23.78   | 3.47   | 1 |

|     |    |    |         |       |   |
|-----|----|----|---------|-------|---|
| -3  | -2 | -1 | 22.11   | 3.23  | 4 |
| -4  | -2 | -1 | 124.73  | 9.08  | 2 |
| -4  | -2 | -1 | 112.64  | 7.16  | 1 |
| -5  | -2 | -1 | 1366.25 | 47.95 | 2 |
| -5  | -2 | -1 | 1338.09 | 42.01 | 1 |
| -6  | -2 | -1 | 6.14    | 3.55  | 2 |
| -6  | -2 | -1 | -1.01   | 2.04  | 1 |
| -7  | -2 | -1 | 50.39   | 8.54  | 2 |
| -7  | -2 | -1 | 65.74   | 5.87  | 1 |
| -8  | -2 | -1 | 738.59  | 33.77 | 2 |
| -9  | -2 | -1 | 51.11   | 9.51  | 2 |
| -10 | -2 | -1 | 419.43  | 25.25 | 2 |
| -11 | -2 | -1 | 308.86  | 21.70 | 2 |
| -12 | -2 | -1 | 119.48  | 16.53 | 2 |
| -13 | -2 | -1 | 22.73   | 9.19  | 2 |
| -14 | -2 | -1 | 25.78   | 9.66  | 2 |
| -15 | -2 | -1 | 16.64   | 9.45  | 2 |
| -17 | 3  | 1  | 1.28    | 6.12  | 3 |
| -16 | 3  | 1  | 5.61    | 7.57  | 3 |
| -15 | 3  | 1  | 17.72   | 9.14  | 3 |
| -14 | 3  | 1  | 517.40  | 29.75 | 2 |
| -14 | 3  | 1  | 477.92  | 31.27 | 3 |
| -13 | 3  | 1  | 206.12  | 18.73 | 3 |
| -13 | 3  | 1  | 193.96  | 16.63 | 2 |
| -12 | 3  | 1  | 148.78  | 15.06 | 2 |
| -12 | 3  | 1  | 131.54  | 15.40 | 3 |
| -11 | 3  | 1  | 5.51    | 4.03  | 2 |
| -11 | 3  | 1  | 1.41    | 3.84  | 3 |
| -10 | 3  | 1  | 8.26    | 4.79  | 3 |
| -10 | 3  | 1  | 12.40   | 5.24  | 2 |
| -9  | 3  | 1  | 13.72   | 4.71  | 2 |
| -9  | 3  | 1  | 6.13    | 3.89  | 3 |
| -8  | 3  | 1  | 764.41  | 31.78 | 2 |
| -8  | 3  | 1  | 792.88  | 32.65 | 3 |
| -7  | 3  | 1  | 103.79  | 8.76  | 2 |
| -7  | 3  | 1  | 128.01  | 9.92  | 3 |
| 7   | -3 | -1 | 103.76  | 5.80  | 1 |
| -6  | 3  | 1  | 1391.63 | 47.03 | 3 |
| 6   | -3 | -1 | 1336.58 | 40.56 | 1 |
| -6  | 3  | 1  | 1401.36 | 46.70 | 2 |
| -5  | 3  | 1  | 3.65    | 2.32  | 3 |
| 5   | -3 | -1 | 12.40   | 2.31  | 1 |
| -5  | 3  | 1  | 11.48   | 3.26  | 2 |
| -4  | 3  | 1  | 1401.15 | 45.72 | 2 |
| 4   | -3 | -1 | 1462.36 | 42.70 | 1 |
| -4  | 3  | 1  | 1432.74 | 45.63 | 3 |

-3 3 1 551.39 19.68 3  
-3 3 1 553.59 20.28 2  
2 -3 -1 13.02 2.50 1  
-2 3 1 12.82 2.73 2  
1 -3 -1 8742.55 240.24 1  
-1 3 1 8591.65 246.09 2  
0 -3 -1 2254.97 66.20 1  
-1 -3 -1 1907.07 56.49 1  
-1 -3 -1 1847.56 55.91 4  
-2 -3 -1 29.52 4.03 4  
-2 -3 -1 28.90 4.12 1  
-3 -3 -1 797.20 27.09 4  
-3 -3 -1 773.23 27.25 1  
-4 -3 -1 128.37 8.44 1  
-4 -3 -1 111.25 7.58 4  
-5 -3 -1 11.04 3.38 1  
-5 -3 -1 13.25 4.03 2  
-6 -3 -1 210.94 11.64 1  
-6 -3 -1 201.74 14.34 2  
-7 -3 -1 2.05 3.17 2  
-7 -3 -1 0.45 2.87 1  
-8 -3 -1 165.73 14.33 2  
-9 -3 -1 54.88 10.50 2  
-10 -3 -1 20.71 6.89 2  
-11 -3 -1 55.13 11.50 2  
-12 -3 -1 249.51 21.01 2  
-13 -3 -1 10.55 6.97 2  
-14 -3 -1 5.67 6.64 2  
-15 -3 -1 -3.92 7.63 2  
-17 4 1 1.98 6.18 3  
-16 4 1 84.89 17.07 3  
-15 4 1 23.45 10.15 3  
-15 4 1 25.05 8.04 2  
-14 4 1 0.12 4.65 2  
-14 4 1 -0.47 6.63 3  
-13 4 1 126.75 16.51 3  
-13 4 1 129.70 15.22 2  
-12 4 1 79.33 12.95 3  
-12 4 1 56.31 10.38 2  
-11 4 1 14.76 6.58 3  
-11 4 1 22.52 6.39 2  
-10 4 1 1285.49 49.36 2  
-10 4 1 1251.17 49.62 3  
-9 4 1 487.89 24.66 3  
-9 4 1 474.64 23.97 2  
-8 4 1 8.88 3.70 2

|     |    |    |         |        |   |
|-----|----|----|---------|--------|---|
| 8   | -4 | -1 | 14.17   | 2.58   | 1 |
| -8  | 4  | 1  | 12.98   | 4.63   | 3 |
| -7  | 4  | 1  | 457.08  | 21.20  | 3 |
| -7  | 4  | 1  | 441.84  | 21.05  | 2 |
| 7   | -4 | -1 | 438.58  | 15.99  | 1 |
| 6   | -4 | -1 | 766.41  | 24.80  | 1 |
| -6  | 4  | 1  | 763.00  | 29.13  | 3 |
| -6  | 4  | 1  | 707.12  | 28.84  | 2 |
| -5  | 4  | 1  | 136.87  | 8.91   | 3 |
| -5  | 4  | 1  | 146.23  | 9.27   | 2 |
| 5   | -4 | -1 | 141.04  | 7.56   | 1 |
| -4  | 4  | 1  | 392.95  | 16.94  | 2 |
| 4   | -4 | -1 | 364.30  | 14.68  | 1 |
| -4  | 4  | 1  | 414.78  | 16.29  | 3 |
| -3  | 4  | 1  | 61.59   | 5.50   | 2 |
| 3   | -4 | -1 | 64.55   | 4.98   | 1 |
| 2   | -4 | -1 | 145.16  | 8.04   | 1 |
| -2  | 4  | 1  | 137.62  | 7.52   | 3 |
| -2  | 4  | 1  | 135.99  | 8.34   | 2 |
| -1  | 4  | 1  | 1351.64 | 43.43  | 2 |
| 1   | -4 | -1 | 1322.11 | 41.99  | 1 |
| 0   | -4 | -1 | 3531.09 | 103.90 | 4 |
| 0   | -4 | -1 | 3707.90 | 104.96 | 1 |
| -1  | -4 | -1 | 4.13    | 2.15   | 4 |
| -1  | -4 | -1 | 2.39    | 2.35   | 1 |
| -2  | -4 | -1 | 145.13  | 9.04   | 4 |
| -2  | -4 | -1 | 144.01  | 9.23   | 1 |
| -3  | -4 | -1 | 127.42  | 9.03   | 1 |
| -3  | -4 | -1 | 114.15  | 8.31   | 4 |
| -4  | -4 | -1 | 114.18  | 8.80   | 1 |
| -4  | -4 | -1 | 112.00  | 8.32   | 4 |
| -5  | -4 | -1 | 831.73  | 29.88  | 4 |
| -5  | -4 | -1 | 791.25  | 29.80  | 1 |
| -6  | -4 | -1 | 189.36  | 14.61  | 2 |
| -6  | -4 | -1 | 220.47  | 12.78  | 1 |
| -7  | -4 | -1 | 71.97   | 11.07  | 2 |
| -7  | -4 | -1 | 68.55   | 7.90   | 1 |
| -8  | -4 | -1 | 162.58  | 14.80  | 2 |
| -9  | -4 | -1 | 52.72   | 10.59  | 2 |
| -10 | -4 | -1 | 49.70   | 10.60  | 2 |
| -11 | -4 | -1 | 152.47  | 18.67  | 2 |
| -12 | -4 | -1 | 22.94   | 8.64   | 2 |
| -13 | -4 | -1 | 117.70  | 17.82  | 2 |
| -14 | -4 | -1 | 19.83   | 9.72   | 2 |
| -17 | 5  | 1  | 79.94   | 15.77  | 3 |
| -16 | 5  | 1  | 199.01  | 22.97  | 3 |

|     |    |    |        |       |   |
|-----|----|----|--------|-------|---|
| -15 | 5  | 1  | 4.73   | 6.91  | 3 |
| -15 | 5  | 1  | 10.97  | 6.86  | 2 |
| -14 | 5  | 1  | 73.75  | 14.13 | 3 |
| -14 | 5  | 1  | 62.10  | 12.14 | 2 |
| -13 | 5  | 1  | 24.73  | 8.73  | 3 |
| -13 | 5  | 1  | 15.29  | 6.46  | 2 |
| -12 | 5  | 1  | 2.44   | 3.42  | 2 |
| -12 | 5  | 1  | 0.25   | 4.48  | 3 |
| -11 | 5  | 1  | 42.08  | 8.78  | 2 |
| -11 | 5  | 1  | 23.78  | 7.70  | 3 |
| -10 | 5  | 1  | 93.53  | 11.61 | 3 |
| -10 | 5  | 1  | 97.30  | 11.94 | 2 |
| -9  | 5  | 1  | 265.83 | 17.47 | 3 |
| -9  | 5  | 1  | 273.64 | 17.44 | 2 |
| -8  | 5  | 1  | 82.60  | 9.78  | 2 |
| 8   | -5 | -1 | 73.21  | 5.83  | 1 |
| -8  | 5  | 1  | 70.92  | 8.87  | 3 |
| 7   | -5 | -1 | 19.88  | 3.41  | 1 |
| -7  | 5  | 1  | 18.44  | 4.59  | 3 |
| -7  | 5  | 1  | 15.83  | 4.63  | 2 |
| 6   | -5 | -1 | 159.86 | 8.66  | 1 |
| -6  | 5  | 1  | 148.55 | 10.37 | 3 |
| -6  | 5  | 1  | 140.31 | 10.25 | 2 |
| -5  | 5  | 1  | 59.75  | 6.08  | 3 |
| 5   | -5 | -1 | 68.41  | 5.54  | 1 |
| -5  | 5  | 1  | 56.62  | 6.89  | 2 |
| 4   | -5 | -1 | 926.56 | 30.77 | 1 |
| -3  | 5  | 1  | 549.18 | 19.85 | 3 |
| -3  | 5  | 1  | 501.77 | 21.17 | 2 |
| 3   | -5 | -1 | 536.75 | 20.20 | 1 |
| 2   | -5 | -1 | 12.72  | 3.09  | 1 |
| -2  | 5  | 1  | 8.29   | 3.07  | 2 |
| -1  | 5  | 1  | 90.04  | 7.52  | 2 |
| 1   | -5 | -1 | 90.77  | 7.10  | 1 |
| 0   | -5 | -1 | 11.65  | 3.37  | 4 |
| 0   | -5 | -1 | 10.95  | 3.52  | 1 |
| -1  | -5 | -1 | 2.61   | 2.55  | 1 |
| -1  | -5 | -1 | 1.77   | 1.98  | 4 |
| -2  | -5 | -1 | 494.09 | 21.03 | 4 |
| -2  | -5 | -1 | 508.93 | 21.49 | 1 |
| -3  | -5 | -1 | 98.66  | 8.62  | 1 |
| -3  | -5 | -1 | 94.70  | 8.17  | 4 |
| -4  | -5 | -1 | 69.94  | 7.71  | 4 |
| -4  | -5 | -1 | 88.90  | 8.74  | 1 |
| -5  | -5 | -1 | 210.69 | 13.02 | 1 |
| -6  | -5 | -1 | 162.51 | 14.13 | 2 |

|     |    |    |        |       |   |
|-----|----|----|--------|-------|---|
| -6  | -5 | -1 | 158.35 | 11.54 | 1 |
| -7  | -5 | -1 | 7.46   | 4.38  | 2 |
| -7  | -5 | -1 | 23.77  | 5.57  | 1 |
| -8  | -5 | -1 | 254.56 | 19.50 | 2 |
| -9  | -5 | -1 | 418.21 | 27.00 | 2 |
| -10 | -5 | -1 | 9.80   | 5.63  | 2 |
| -11 | -5 | -1 | 24.29  | 8.73  | 2 |
| -12 | -5 | -1 | 62.18  | 13.82 | 2 |
| -13 | -5 | -1 | 13.96  | 8.09  | 2 |
| -14 | -5 | -1 | 70.75  | 16.21 | 2 |
| -17 | 6  | 1  | 2.27   | 7.51  | 3 |
| -16 | 6  | 1  | 12.13  | 8.47  | 3 |
| -15 | 6  | 1  | 91.30  | 15.25 | 2 |
| -15 | 6  | 1  | 65.37  | 14.28 | 3 |
| -14 | 6  | 1  | 2.98   | 7.05  | 3 |
| -14 | 6  | 1  | 0.37   | 4.23  | 2 |
| -13 | 6  | 1  | 102.66 | 14.70 | 3 |
| -13 | 6  | 1  | 115.70 | 14.93 | 2 |
| -12 | 6  | 1  | 48.64  | 10.33 | 2 |
| -12 | 6  | 1  | 81.30  | 12.93 | 3 |
| -11 | 6  | 1  | 36.39  | 8.73  | 3 |
| -11 | 6  | 1  | 60.36  | 10.49 | 2 |
| -10 | 6  | 1  | 670.11 | 31.52 | 3 |
| -10 | 6  | 1  | 662.53 | 31.72 | 2 |
| -9  | 6  | 1  | 8.30   | 4.39  | 2 |
| -9  | 6  | 1  | 13.69  | 5.10  | 3 |
| -8  | 6  | 1  | 4.99   | 3.67  | 2 |
| 8   | -6 | -1 | 7.58   | 3.09  | 1 |
| -8  | 6  | 1  | 6.13   | 3.86  | 3 |
| -7  | 6  | 1  | 2.71   | 2.81  | 2 |
| 7   | -6 | -1 | 1.40   | 1.99  | 1 |
| -7  | 6  | 1  | -0.95  | 1.99  | 3 |
| -6  | 6  | 1  | 231.09 | 14.62 | 2 |
| 6   | -6 | -1 | 273.13 | 12.67 | 1 |
| -5  | 6  | 1  | 304.41 | 15.58 | 2 |
| -5  | 6  | 1  | 231.46 | 12.70 | 3 |
| -4  | 6  | 1  | 280.20 | 14.87 | 2 |
| -4  | 6  | 1  | 285.66 | 13.31 | 3 |
| 4   | -6 | -1 | 274.19 | 13.47 | 1 |
| -3  | 6  | 1  | 82.52  | 6.48  | 3 |
| -3  | 6  | 1  | 87.76  | 7.79  | 2 |
| 3   | -6 | -1 | 78.14  | 6.77  | 1 |
| 2   | -6 | -1 | 871.47 | 30.68 | 1 |
| -2  | 6  | 1  | 803.50 | 31.33 | 2 |
| 1   | -6 | -1 | 0.53   | 2.36  | 1 |
| -1  | 6  | 1  | 4.85   | 3.07  | 2 |



|     |    |    |         |       |   |
|-----|----|----|---------|-------|---|
| 0   | -6 | -1 | 2788.68 | 86.76 | 1 |
| 0   | -6 | -1 | 2931.37 | 86.70 | 4 |
| -1  | -6 | -1 | 186.77  | 12.21 | 1 |
| -1  | -6 | -1 | 183.74  | 11.67 | 4 |
| -2  | -6 | -1 | -0.51   | 2.13  | 4 |
| -2  | -6 | -1 | 1.22    | 2.90  | 1 |
| -3  | -6 | -1 | 837.43  | 32.97 | 1 |
| -3  | -6 | -1 | 877.57  | 32.90 | 4 |
| -4  | -6 | -1 | 40.83   | 6.72  | 4 |
| -4  | -6 | -1 | 31.65   | 6.49  | 1 |
| -5  | -6 | -1 | 150.02  | 11.93 | 1 |
| -6  | -6 | -1 | 18.74   | 5.67  | 1 |
| -7  | -6 | -1 | 68.34   | 11.84 | 2 |
| -7  | -6 | -1 | 51.11   | 8.54  | 1 |
| -8  | -6 | -1 | 29.16   | 7.38  | 2 |
| -9  | -6 | -1 | 81.03   | 14.45 | 2 |
| -10 | -6 | -1 | 28.63   | 9.05  | 2 |
| -11 | -6 | -1 | -2.75   | 5.77  | 2 |
| -12 | -6 | -1 | 97.35   | 17.03 | 2 |
| -13 | -6 | -1 | 56.89   | 14.31 | 2 |
| -17 | 7  | 1  | -10.07  | 6.26  | 3 |
| -16 | 7  | 1  | -0.17   | 7.69  | 3 |
| -15 | 7  | 1  | 10.70   | 6.98  | 2 |
| -15 | 7  | 1  | 9.12    | 8.34  | 3 |
| -14 | 7  | 1  | 4.88    | 5.13  | 2 |
| -14 | 7  | 1  | 0.60    | 6.73  | 3 |
| -13 | 7  | 1  | -0.08   | 5.63  | 3 |
| -13 | 7  | 1  | 2.37    | 4.52  | 2 |
| -12 | 7  | 1  | 23.03   | 8.05  | 3 |
| -12 | 7  | 1  | 29.83   | 7.76  | 2 |
| -11 | 7  | 1  | 1.57    | 3.89  | 2 |
| -11 | 7  | 1  | -2.42   | 4.00  | 3 |
| -10 | 7  | 1  | 12.50   | 5.05  | 2 |
| -10 | 7  | 1  | 9.73    | 5.04  | 3 |
| -9  | 7  | 1  | 18.22   | 5.99  | 2 |
| -9  | 7  | 1  | 31.13   | 7.03  | 3 |
| -8  | 7  | 1  | 127.14  | 10.99 | 3 |
| 8   | -7 | -1 | 118.56  | 8.67  | 1 |
| -8  | 7  | 1  | 124.42  | 12.45 | 2 |
| 7   | -7 | -1 | 65.08   | 6.74  | 1 |
| -7  | 7  | 1  | 58.78   | 8.66  | 2 |
| -6  | 7  | 1  | 1556.37 | 54.84 | 2 |
| 6   | -7 | -1 | 1543.81 | 50.11 | 1 |
| -6  | 7  | 1  | 1597.72 | 52.52 | 3 |
| -5  | 7  | 1  | 173.76  | 10.61 | 3 |
| -5  | 7  | 1  | 168.70  | 11.93 | 2 |

|     |    |    |        |       |   |
|-----|----|----|--------|-------|---|
| 5   | -7 | -1 | 143.60 | 9.64  | 1 |
| 4   | -7 | -1 | 4.45   | 2.54  | 1 |
| -4  | 7  | 1  | -3.09  | 2.13  | 3 |
| -4  | 7  | 1  | 2.85   | 2.85  | 2 |
| -3  | 7  | 1  | 6.82   | 3.34  | 2 |
| 3   | -7 | -1 | 6.41   | 3.06  | 1 |
| -2  | 7  | 1  | 10.20  | 4.05  | 2 |
| 2   | -7 | -1 | 5.54   | 2.64  | 1 |
| 1   | -7 | -1 | 483.23 | 21.61 | 1 |
| 0   | -7 | -1 | 49.93  | 7.10  | 1 |
| 0   | -7 | -1 | 60.00  | 7.57  | 4 |
| -1  | -7 | -1 | 523.47 | 23.33 | 4 |
| -1  | -7 | -1 | 510.90 | 23.50 | 1 |
| -2  | -7 | -1 | 73.97  | 8.73  | 4 |
| -2  | -7 | -1 | 62.97  | 8.55  | 1 |
| -3  | -7 | -1 | 111.69 | 11.06 | 1 |
| -3  | -7 | -1 | 127.59 | 10.61 | 4 |
| -4  | -7 | -1 | 24.36  | 6.53  | 1 |
| -4  | -7 | -1 | 23.06  | 5.51  | 4 |
| -5  | -7 | -1 | 139.64 | 12.40 | 1 |
| -6  | -7 | -1 | 149.69 | 13.04 | 1 |
| -7  | -7 | -1 | 623.05 | 34.55 | 2 |
| -7  | -7 | -1 | 666.07 | 29.83 | 1 |
| -8  | -7 | -1 | 12.73  | 6.39  | 2 |
| -9  | -7 | -1 | 25.91  | 8.48  | 2 |
| -10 | -7 | -1 | 8.62   | 7.37  | 2 |
| -11 | -7 | -1 | 4.27   | 6.90  | 2 |
| -12 | -7 | -1 | 100.02 | 18.09 | 2 |
| -13 | -7 | -1 | -7.81  | 8.32  | 2 |
| -17 | 8  | 1  | 2.95   | 8.18  | 3 |
| -16 | 8  | 1  | 10.18  | 8.59  | 3 |
| -15 | 8  | 1  | 4.27   | 7.85  | 3 |
| -15 | 8  | 1  | 10.23  | 7.03  | 2 |
| -14 | 8  | 1  | 160.33 | 18.75 | 3 |
| -14 | 8  | 1  | 190.76 | 19.18 | 2 |
| -13 | 8  | 1  | 103.77 | 14.67 | 2 |
| -13 | 8  | 1  | 115.85 | 15.74 | 3 |
| -12 | 8  | 1  | 101.09 | 13.83 | 2 |
| -12 | 8  | 1  | 110.61 | 14.26 | 3 |
| -11 | 8  | 1  | 88.88  | 12.50 | 2 |
| -11 | 8  | 1  | 66.09  | 10.83 | 3 |
| -10 | 8  | 1  | 5.97   | 4.86  | 3 |
| -10 | 8  | 1  | 4.10   | 3.83  | 2 |
| -9  | 8  | 1  | 2.20   | 3.73  | 2 |
| -9  | 8  | 1  | 11.21  | 4.74  | 3 |
| -8  | 8  | 1  | -0.77  | 2.46  | 3 |

|     |    |    |        |       |   |
|-----|----|----|--------|-------|---|
| 8   | -8 | -1 | -0.79  | 3.06  | 1 |
| -8  | 8  | 1  | 7.03   | 4.40  | 2 |
| -7  | 8  | 1  | 276.01 | 15.75 | 3 |
| 7   | -8 | -1 | 291.05 | 14.65 | 1 |
| -7  | 8  | 1  | 285.82 | 17.88 | 2 |
| -6  | 8  | 1  | 27.57  | 5.39  | 3 |
| -6  | 8  | 1  | 27.95  | 6.43  | 2 |
| -5  | 8  | 1  | 371.15 | 17.07 | 3 |
| -5  | 8  | 1  | 356.74 | 19.45 | 2 |
| 5   | -8 | -1 | 347.79 | 17.25 | 1 |
| -4  | 8  | 1  | 27.89  | 5.06  | 3 |
| -4  | 8  | 1  | 25.92  | 6.07  | 2 |
| 4   | -8 | -1 | 15.80  | 4.37  | 1 |
| 3   | -8 | -1 | 229.13 | 13.56 | 1 |
| -3  | 8  | 1  | 215.42 | 14.46 | 2 |
| 2   | -8 | -1 | 391.87 | 19.39 | 1 |
| -2  | 8  | 1  | 380.82 | 20.23 | 2 |
| 1   | -8 | -1 | 16.74  | 5.28  | 1 |
| 0   | -8 | -1 | 27.95  | 6.52  | 1 |
| -1  | -8 | -1 | 252.76 | 16.19 | 1 |
| -1  | -8 | -1 | 255.28 | 15.86 | 4 |
| -2  | -8 | -1 | 9.89   | 4.84  | 1 |
| -2  | -8 | -1 | 11.17  | 4.54  | 4 |
| -3  | -8 | -1 | 37.23  | 7.89  | 1 |
| -4  | -8 | -1 | 6.52   | 5.16  | 1 |
| -5  | -8 | -1 | 96.30  | 11.75 | 1 |
| -6  | -8 | -1 | 4.66   | 5.18  | 1 |
| -7  | -8 | -1 | -3.99  | 4.83  | 1 |
| -8  | -8 | -1 | 265.61 | 22.43 | 2 |
| -9  | -8 | -1 | 13.10  | 8.07  | 2 |
| -10 | -8 | -1 | 209.47 | 25.69 | 2 |
| -11 | -8 | -1 | 26.60  | 9.68  | 2 |
| -12 | -8 | -1 | 8.43   | 9.65  | 2 |
| -17 | 9  | 1  | 39.02  | 13.24 | 3 |
| -16 | 9  | 1  | 17.49  | 9.55  | 3 |
| -15 | 9  | 1  | 11.74  | 6.74  | 2 |
| -15 | 9  | 1  | 11.27  | 8.81  | 3 |
| -14 | 9  | 1  | 39.41  | 11.29 | 3 |
| -14 | 9  | 1  | 19.19  | 9.14  | 2 |
| -13 | 9  | 1  | 22.96  | 8.19  | 2 |
| -13 | 9  | 1  | 30.97  | 10.56 | 3 |
| -12 | 9  | 1  | 97.76  | 14.05 | 3 |
| -12 | 9  | 1  | 119.09 | 15.44 | 2 |
| -11 | 9  | 1  | 6.30   | 5.86  | 2 |
| -11 | 9  | 1  | 2.49   | 4.94  | 3 |
| -10 | 9  | 1  | 235.30 | 16.92 | 3 |

-10 9 1 247.85 18.66 2  
-9 9 1 1.05 3.21 3  
-9 9 1 27.25 7.10 2  
-8 9 1 1.90 3.82 2  
-8 9 1 8.92 4.33 3  
8 -9 -1 6.65 3.55 1  
-7 9 1 173.24 11.66 3  
-7 9 1 134.75 12.26 2  
7 -9 -1 98.86 8.75 1  
-6 9 1 1.05 3.24 2  
6 -9 -1 3.90 3.00 1  
-6 9 1 3.23 3.61 3  
-5 9 1 92.41 8.33 3  
5 -9 -1 98.25 9.71 1  
-5 9 1 92.95 11.08 2  
4 -9 -1 17.72 4.97 1  
-4 9 1 12.72 4.93 2  
-3 9 1 249.35 17.15 2  
3 -9 -1 289.79 16.44 1  
-2 9 1 108.07 12.27 2  
2 -9 -1 132.17 11.19 1  
1 -9 -1 88.35 10.33 1  
0 -9 -1 17.86 6.22 1  
-1 -9 -1 54.74 9.24 1  
-2 -9 -1 10.56 5.62 1  
-3 -9 -1 169.38 14.31 1  
-4 -9 -1 1.51 4.44 1  
-5 -9 -1 7.85 5.04 1  
-6 -9 -1 12.13 6.37 1  
-7 -9 -1 224.43 17.93 1  
-8 -9 -1 5.77 6.82 2  
-9 -9 -1 29.93 10.54 2  
-10 -9 -1 -3.17 6.71 2  
-11 -9 -1 12.09 9.58 2  
-12 -9 -1 -2.92 10.70 2  
-15 10 1 99.91 16.54 2  
-14 10 1 -0.80 6.14 3  
-14 10 1 -1.03 5.51 2  
-13 10 1 35.51 9.98 3  
-13 10 1 23.67 8.77 2  
-12 10 1 106.40 15.16 2  
-12 10 1 110.89 14.44 3  
-11 10 1 7.56 4.85 3  
-11 10 1 51.64 10.64 2  
-10 10 1 58.58 10.80 2  
-10 10 1 60.41 9.70 3

|     |     |    |         |       |   |
|-----|-----|----|---------|-------|---|
| -9  | 10  | 1  | 306.33  | 18.47 | 3 |
| -9  | 10  | 1  | 295.71  | 20.37 | 2 |
| 8   | -10 | -1 | 72.39   | 8.34  | 1 |
| -8  | 10  | 1  | 63.98   | 10.50 | 2 |
| -8  | 10  | 1  | 70.48   | 8.96  | 3 |
| 7   | -10 | -1 | -2.11   | 2.57  | 1 |
| -7  | 10  | 1  | 6.84    | 4.50  | 2 |
| -7  | 10  | 1  | 10.10   | 4.15  | 3 |
| -6  | 10  | 1  | 28.16   | 6.12  | 3 |
| -6  | 10  | 1  | 23.98   | 6.89  | 2 |
| 6   | -10 | -1 | 28.81   | 6.20  | 1 |
| -5  | 10  | 1  | 1.58    | 3.66  | 3 |
| 5   | -10 | -1 | 0.97    | 3.45  | 1 |
| -5  | 10  | 1  | -1.58   | 3.16  | 2 |
| 4   | -10 | -1 | 445.88  | 22.65 | 1 |
| -4  | 10  | 1  | 488.77  | 25.33 | 2 |
| -3  | 10  | 1  | 1313.47 | 49.81 | 2 |
| 3   | -10 | -1 | 1193.41 | 45.94 | 1 |
| -2  | 10  | 1  | 382.80  | 22.73 | 2 |
| 2   | -10 | -1 | 402.61  | 21.64 | 1 |
| 1   | -10 | -1 | 2.32    | 3.69  | 1 |
| 0   | -10 | -1 | 0.53    | 4.38  | 1 |
| -1  | -10 | -1 | 90.95   | 11.82 | 1 |
| -2  | -10 | -1 | 78.33   | 11.00 | 1 |
| -3  | -10 | -1 | 61.44   | 10.52 | 1 |
| -4  | -10 | -1 | 90.89   | 12.54 | 1 |
| -5  | -10 | -1 | 35.42   | 8.74  | 1 |
| -6  | -10 | -1 | 5.25    | 6.72  | 1 |
| -7  | -10 | -1 | 14.71   | 7.26  | 1 |
| -8  | -10 | -1 | 196.24  | 26.16 | 2 |
| -9  | -10 | -1 | 152.58  | 23.85 | 2 |
| -10 | -10 | -1 | 42.51   | 14.07 | 2 |
| -11 | -10 | -1 | 175.61  | 28.34 | 2 |
| -15 | 11  | 1  | 91.81   | 16.32 | 2 |
| -14 | 11  | 1  | 59.78   | 12.91 | 2 |
| -13 | 11  | 1  | 178.78  | 19.65 | 2 |
| -12 | 11  | 1  | 302.49  | 22.82 | 2 |
| -11 | 11  | 1  | 10.25   | 6.73  | 2 |
| -10 | 11  | 1  | 54.61   | 10.59 | 2 |
| -9  | 11  | 1  | 10.42   | 5.58  | 2 |
| -8  | 11  | 1  | 20.85   | 6.91  | 2 |
| 8   | -11 | -1 | -2.65   | 2.75  | 1 |
| -7  | 11  | 1  | 114.96  | 13.66 | 2 |
| 7   | -11 | -1 | 106.80  | 11.04 | 1 |
| -6  | 11  | 1  | -3.42   | 3.07  | 2 |
| 6   | -11 | -1 | 1.50    | 3.79  | 1 |

|     |     |    |        |       |   |
|-----|-----|----|--------|-------|---|
| 5   | -11 | -1 | 363.52 | 20.58 | 1 |
| -5  | 11  | 1  | 392.12 | 23.32 | 2 |
| -4  | 11  | 1  | 4.93   | 5.23  | 2 |
| 4   | -11 | -1 | 5.04   | 3.69  | 1 |
| -3  | 11  | 1  | 21.04  | 7.04  | 2 |
| 3   | -11 | -1 | 33.87  | 7.69  | 1 |
| 2   | -11 | -1 | 182.02 | 14.63 | 1 |
| 1   | -11 | -1 | 8.54   | 5.74  | 1 |
| 0   | -11 | -1 | 52.85  | 10.01 | 1 |
| -1  | -11 | -1 | 91.07  | 12.55 | 1 |
| -2  | -11 | -1 | 19.49  | 7.19  | 1 |
| -3  | -11 | -1 | 50.03  | 10.42 | 1 |
| -4  | -11 | -1 | 3.14   | 5.93  | 1 |
| -5  | -11 | -1 | 3.76   | 6.19  | 1 |
| -6  | -11 | -1 | 31.04  | 8.90  | 1 |
| -7  | -11 | -1 | 14.61  | 7.91  | 1 |
| -9  | -11 | -1 | 9.72   | 10.56 | 2 |
| -10 | -11 | -1 | 22.11  | 12.84 | 2 |
| -15 | 12  | 1  | 21.06  | 9.58  | 2 |
| -14 | 12  | 1  | 16.19  | 8.56  | 2 |
| -13 | 12  | 1  | 14.00  | 8.38  | 2 |
| -12 | 12  | 1  | -2.37  | 5.14  | 2 |
| -11 | 12  | 1  | 252.65 | 20.57 | 2 |
| -10 | 12  | 1  | 11.06  | 6.05  | 2 |
| -9  | 12  | 1  | 2.01   | 5.25  | 2 |
| -8  | 12  | 1  | -1.94  | 4.06  | 2 |
| 8   | -12 | -1 | 6.66   | 4.34  | 1 |
| 7   | -12 | -1 | 66.81  | 9.54  | 1 |
| -7  | 12  | 1  | 54.34  | 10.35 | 2 |
| -6  | 12  | 1  | 391.80 | 24.46 | 2 |
| 6   | -12 | -1 | 396.73 | 22.11 | 1 |
| -5  | 12  | 1  | 69.71  | 11.85 | 2 |
| 5   | -12 | -1 | 53.61  | 9.94  | 1 |
| -4  | 12  | 1  | 58.56  | 11.04 | 2 |
| 4   | -12 | -1 | 35.22  | 8.54  | 1 |
| -3  | 12  | 1  | 525.23 | 29.37 | 2 |
| 3   | -12 | -1 | 509.27 | 27.16 | 1 |
| 2   | -12 | -1 | 34.90  | 8.66  | 1 |
| 1   | -12 | -1 | 35.94  | 9.07  | 1 |
| 0   | -12 | -1 | 7.27   | 5.60  | 1 |
| -1  | -12 | -1 | 133.41 | 15.40 | 1 |
| -2  | -12 | -1 | 20.55  | 7.10  | 1 |
| -3  | -12 | -1 | 5.01   | 6.07  | 1 |
| -4  | -12 | -1 | 8.05   | 7.56  | 1 |
| -5  | -12 | -1 | 3.07   | 6.00  | 1 |
| -6  | -12 | -1 | 222.24 | 19.54 | 1 |

|     |     |    |        |       |   |
|-----|-----|----|--------|-------|---|
| -9  | -12 | -1 | 22.36  | 14.14 | 2 |
| -15 | 13  | 1  | 138.25 | 20.11 | 2 |
| -14 | 13  | 1  | 4.62   | 6.27  | 2 |
| -13 | 13  | 1  | -1.76  | 5.57  | 2 |
| -12 | 13  | 1  | 129.48 | 17.62 | 2 |
| -11 | 13  | 1  | 162.77 | 18.79 | 2 |
| -10 | 13  | 1  | 13.33  | 6.98  | 2 |
| 9   | -13 | -1 | -0.93  | 4.36  | 1 |
| -9  | 13  | 1  | 12.51  | 7.49  | 2 |
| -8  | 13  | 1  | 68.88  | 12.37 | 2 |
| 8   | -13 | -1 | 88.36  | 11.84 | 1 |
| -7  | 13  | 1  | 0.94   | 4.06  | 2 |
| 7   | -13 | -1 | 1.87   | 5.56  | 1 |
| -6  | 13  | 1  | 33.18  | 8.84  | 2 |
| 6   | -13 | -1 | 23.02  | 7.66  | 1 |
| 5   | -13 | -1 | 108.99 | 13.86 | 1 |
| -5  | 13  | 1  | 118.96 | 15.77 | 2 |
| 4   | -13 | -1 | 222.47 | 17.84 | 1 |
| -4  | 13  | 1  | 249.80 | 19.89 | 2 |
| 3   | -13 | -1 | 6.75   | 5.89  | 1 |
| 2   | -13 | -1 | 49.56  | 10.17 | 1 |
| 1   | -13 | -1 | -0.52  | 4.90  | 1 |
| 0   | -13 | -1 | -0.12  | 5.85  | 1 |
| -1  | -13 | -1 | 543.23 | 30.76 | 1 |
| -2  | -13 | -1 | 2.40   | 6.64  | 1 |
| -3  | -13 | -1 | 68.64  | 12.54 | 1 |
| -4  | -13 | -1 | 113.01 | 15.70 | 1 |
| -5  | -13 | -1 | 33.17  | 10.76 | 1 |
| -6  | -13 | -1 | 6.92   | 8.43  | 1 |
| -15 | 14  | 1  | 0.91   | 8.39  | 2 |
| -14 | 14  | 1  | 116.09 | 18.56 | 2 |
| -13 | 14  | 1  | 298.68 | 24.97 | 2 |
| -12 | 14  | 1  | 23.15  | 9.14  | 2 |
| -11 | 14  | 1  | -7.24  | 4.62  | 2 |
| -10 | 14  | 1  | 136.74 | 18.11 | 2 |
| 9   | -14 | -1 | 14.85  | 7.79  | 1 |
| -9  | 14  | 1  | 10.99  | 7.17  | 2 |
| -8  | 14  | 1  | 545.06 | 32.85 | 2 |
| 8   | -14 | -1 | 595.41 | 29.89 | 1 |
| 7   | -14 | -1 | 4.60   | 6.26  | 1 |
| -7  | 14  | 1  | 5.33   | 6.02  | 2 |
| -6  | 14  | 1  | 143.02 | 17.98 | 2 |
| 6   | -14 | -1 | 204.61 | 17.19 | 1 |
| 5   | -14 | -1 | 66.67  | 12.14 | 1 |
| -5  | 14  | 1  | 92.35  | 14.89 | 2 |
| -4  | 14  | 1  | 36.80  | 10.08 | 2 |

|     |     |    |        |       |   |
|-----|-----|----|--------|-------|---|
| 4   | -14 | -1 | 31.48  | 8.88  | 1 |
| 3   | -14 | -1 | 69.80  | 12.86 | 1 |
| 2   | -14 | -1 | 82.74  | 13.78 | 1 |
| 1   | -14 | -1 | 685.01 | 35.47 | 1 |
| 0   | -14 | -1 | 49.88  | 11.62 | 1 |
| -1  | -14 | -1 | 26.09  | 7.96  | 1 |
| -2  | -14 | -1 | 26.38  | 9.67  | 1 |
| -3  | -14 | -1 | 11.16  | 7.79  | 1 |
| -4  | -14 | -1 | 171.68 | 19.59 | 1 |
| -5  | -14 | -1 | 92.94  | 15.85 | 1 |
| -6  | -14 | -1 | 3.23   | 7.91  | 1 |
| -15 | 15  | 1  | -2.59  | 8.42  | 2 |
| -14 | 15  | 1  | 114.55 | 18.98 | 2 |
| -13 | 15  | 1  | 30.63  | 11.09 | 2 |
| -12 | 15  | 1  | 120.84 | 18.27 | 2 |
| -11 | 15  | 1  | 38.61  | 10.95 | 2 |
| -10 | 15  | 1  | 309.91 | 25.07 | 2 |
| 9   | -15 | -1 | 5.16   | 7.31  | 1 |
| -9  | 15  | 1  | 1.48   | 6.44  | 2 |
| -8  | 15  | 1  | 8.02   | 7.01  | 2 |
| 8   | -15 | -1 | 9.80   | 7.63  | 1 |
| -7  | 15  | 1  | 315.15 | 24.72 | 2 |
| 7   | -15 | -1 | 312.53 | 22.11 | 1 |
| -6  | 15  | 1  | 85.61  | 15.07 | 2 |
| 6   | -15 | -1 | 104.02 | 14.28 | 1 |
| -5  | 15  | 1  | 102.74 | 16.52 | 2 |
| 5   | -15 | -1 | 110.01 | 15.32 | 1 |
| 4   | -15 | -1 | 57.02  | 12.24 | 1 |
| 3   | -15 | -1 | -0.54  | 6.17  | 1 |
| 2   | -15 | -1 | 37.24  | 10.74 | 1 |
| 1   | -15 | -1 | 274.34 | 22.27 | 1 |
| 0   | -15 | -1 | 27.23  | 9.97  | 1 |
| -1  | -15 | -1 | 112.58 | 16.65 | 1 |
| -2  | -15 | -1 | 81.41  | 14.77 | 1 |
| -3  | -15 | -1 | 59.83  | 12.84 | 1 |
| -4  | -15 | -1 | 4.91   | 7.42  | 1 |
| -5  | -15 | -1 | 33.09  | 12.30 | 1 |
| -6  | -15 | -1 | 191.34 | 22.96 | 1 |
| -14 | 16  | 1  | 2.48   | 8.10  | 2 |
| -13 | 16  | 1  | 37.29  | 12.30 | 2 |
| -12 | 16  | 1  | 11.33  | 7.51  | 2 |
| -11 | 16  | 1  | 76.04  | 14.97 | 2 |
| -10 | 16  | 1  | 38.72  | 10.92 | 2 |
| -9  | 16  | 1  | 0.23   | 6.23  | 2 |
| 9   | -16 | -1 | 1.80   | 6.99  | 1 |
| 8   | -16 | -1 | 4.90   | 7.26  | 1 |



|     |     |    |        |       |   |
|-----|-----|----|--------|-------|---|
| -8  | 16  | 1  | -2.80  | 6.05  | 2 |
| -7  | 16  | 1  | -5.48  | 5.65  | 2 |
| 7   | -16 | -1 | -2.26  | 6.71  | 1 |
| -6  | 16  | 1  | 25.48  | 9.38  | 2 |
| 6   | -16 | -1 | 15.81  | 8.45  | 1 |
| 5   | -16 | -1 | 26.23  | 9.66  | 1 |
| -5  | 16  | 1  | 18.71  | 9.46  | 2 |
| 4   | -16 | -1 | 45.14  | 12.52 | 1 |
| 3   | -16 | -1 | 122.99 | 17.75 | 1 |
| 2   | -16 | -1 | 3.46   | 8.95  | 1 |
| 1   | -16 | -1 | 24.67  | 9.03  | 1 |
| 0   | -16 | -1 | 51.77  | 12.18 | 1 |
| -1  | -16 | -1 | 6.04   | 7.99  | 1 |
| -2  | -16 | -1 | 240.40 | 24.13 | 1 |
| -3  | -16 | -1 | 12.22  | 9.27  | 1 |
| -4  | -16 | -1 | -13.09 | 8.40  | 1 |
| -5  | -16 | -1 | 35.04  | 12.31 | 1 |
| -13 | 17  | 1  | 24.76  | 12.23 | 2 |
| -12 | 17  | 1  | 46.23  | 13.29 | 2 |
| -11 | 17  | 1  | 6.82   | 7.82  | 2 |
| -10 | 17  | 1  | 27.06  | 10.41 | 2 |
| -9  | 17  | 1  | 75.61  | 15.30 | 2 |
| 8   | -17 | -1 | -2.94  | 7.81  | 1 |
| -8  | 17  | 1  | 5.32   | 6.90  | 2 |
| -7  | 17  | 1  | 25.11  | 9.71  | 2 |
| 7   | -17 | -1 | 31.08  | 10.85 | 1 |
| 6   | -17 | -1 | 7.39   | 8.79  | 1 |
| -6  | 17  | 1  | 6.40   | 6.55  | 2 |
| 5   | -17 | -1 | -2.35  | 7.27  | 1 |
| 4   | -17 | -1 | 106.95 | 17.42 | 1 |
| 3   | -17 | -1 | 7.12   | 9.18  | 1 |
| 2   | -17 | -1 | 47.15  | 13.07 | 1 |
| 1   | -17 | -1 | 23.83  | 9.72  | 1 |
| 0   | -17 | -1 | 93.13  | 16.84 | 1 |
| -1  | -17 | -1 | -1.69  | 7.70  | 1 |
| -2  | -17 | -1 | -5.47  | 10.01 | 1 |
| -3  | -17 | -1 | 51.42  | 15.16 | 1 |
| -4  | -17 | -1 | 41.25  | 14.64 | 1 |
| -12 | 18  | 1  | 29.59  | 12.23 | 2 |
| -11 | 18  | 1  | 11.01  | 9.28  | 2 |
| -10 | 18  | 1  | 15.93  | 9.52  | 2 |
| -9  | 18  | 1  | 6.70   | 8.17  | 2 |
| 8   | -18 | -1 | -3.88  | 8.00  | 1 |
| -8  | 18  | 1  | -2.73  | 7.01  | 2 |
| 7   | -18 | -1 | 16.83  | 9.91  | 1 |
| -7  | 18  | 1  | 20.24  | 10.50 | 2 |

|     |     |    |        |       |   |
|-----|-----|----|--------|-------|---|
| 6   | -18 | -1 | 123.38 | 18.11 | 1 |
| 5   | -18 | -1 | 80.92  | 15.55 | 1 |
| 4   | -18 | -1 | 6.33   | 9.69  | 1 |
| 3   | -18 | -1 | 13.83  | 8.83  | 1 |
| 2   | -18 | -1 | 24.11  | 11.17 | 1 |
| 1   | -18 | -1 | 36.69  | 13.75 | 1 |
| 0   | -18 | -1 | 86.94  | 17.59 | 1 |
| -1  | -18 | -1 | 21.64  | 11.85 | 1 |
| -2  | -18 | -1 | 21.01  | 12.20 | 1 |
| -10 | 19  | 1  | 0.64   | 8.88  | 2 |
| -9  | 19  | 1  | 12.69  | 10.26 | 2 |
| -8  | 19  | 1  | 7.03   | 9.72  | 2 |
| 8   | -19 | -1 | 9.71   | 10.67 | 1 |
| 7   | -19 | -1 | 0.42   | 9.21  | 1 |
| 6   | -19 | -1 | 75.78  | 15.98 | 1 |
| 5   | -19 | -1 | 8.36   | 9.86  | 1 |
| 4   | -19 | -1 | 9.53   | 8.80  | 1 |
| 3   | -19 | -1 | 1.27   | 7.50  | 1 |
| 2   | -19 | -1 | 8.09   | 7.03  | 1 |
| 1   | -19 | -1 | 14.89  | 10.98 | 1 |
| 0   | -19 | -1 | 10.02  | 11.71 | 1 |
| 7   | -20 | -1 | 73.65  | 16.64 | 1 |
| 6   | -20 | -1 | 40.67  | 12.96 | 1 |
| 5   | -20 | -1 | 5.47   | 7.75  | 1 |
| 4   | -20 | -1 | 9.87   | 7.98  | 1 |
| 1   | -20 | 2  | 0.38   | 7.11  | 1 |
| 2   | -20 | 2  | 7.12   | 7.04  | 1 |
| 3   | -20 | 2  | 9.50   | 7.07  | 1 |
| 4   | -20 | 2  | 1.92   | 7.94  | 1 |
| 5   | -20 | 2  | -1.80  | 8.46  | 1 |
| 6   | -20 | 2  | 92.40  | 16.73 | 1 |
| -6  | 20  | -2 | 65.01  | 17.66 | 2 |
| -7  | 20  | -2 | 7.16   | 9.95  | 2 |
| 7   | -20 | 2  | -0.55  | 9.96  | 1 |
| -8  | 20  | -2 | 34.40  | 13.33 | 2 |
| -2  | -19 | 2  | 44.82  | 15.28 | 1 |
| -1  | -19 | 2  | 16.58  | 12.63 | 1 |
| 0   | -19 | 2  | -4.16  | 8.68  | 1 |
| 1   | -19 | 2  | -3.72  | 8.02  | 1 |
| 3   | -19 | 2  | 185.45 | 21.92 | 1 |
| 4   | -19 | 2  | 4.07   | 9.14  | 1 |
| -5  | 19  | -2 | -3.01  | 6.82  | 2 |
| 5   | -19 | 2  | 16.07  | 9.48  | 1 |
| -6  | 19  | -2 | 136.97 | 21.16 | 2 |
| 6   | -19 | 2  | 120.25 | 17.87 | 1 |
| 7   | -19 | 2  | 0.64   | 9.30  | 1 |

|     |     |    |        |       |   |
|-----|-----|----|--------|-------|---|
| -7  | 19  | -2 | 11.35  | 9.59  | 2 |
| -8  | 19  | -2 | 43.71  | 13.20 | 2 |
| -9  | 19  | -2 | 36.55  | 13.29 | 2 |
| -10 | 19  | -2 | 43.32  | 14.45 | 2 |
| -4  | -18 | 2  | 12.62  | 11.23 | 1 |
| -3  | -18 | 2  | 28.77  | 12.40 | 1 |
| -2  | -18 | 2  | 8.06   | 9.92  | 1 |
| -1  | -18 | 2  | 31.58  | 12.64 | 1 |
| 0   | -18 | 2  | 54.00  | 14.03 | 1 |
| 1   | -18 | 2  | 48.82  | 12.99 | 1 |
| 2   | -18 | 2  | -3.03  | 8.05  | 1 |
| 3   | -18 | 2  | 0.30   | 7.90  | 1 |
| 4   | -18 | 2  | 98.27  | 15.59 | 1 |
| -4  | 18  | -2 | 63.00  | 14.73 | 2 |
| -5  | 18  | -2 | 3.49   | 7.55  | 2 |
| 5   | -18 | 2  | 10.93  | 8.81  | 1 |
| 6   | -18 | 2  | 39.31  | 12.57 | 1 |
| -6  | 18  | -2 | 26.26  | 10.62 | 2 |
| 7   | -18 | 2  | 19.42  | 9.77  | 1 |
| -7  | 18  | -2 | 39.11  | 11.65 | 2 |
| -8  | 18  | -2 | 25.20  | 9.87  | 2 |
| -9  | 18  | -2 | 263.40 | 27.84 | 2 |
| -10 | 18  | -2 | 39.14  | 12.25 | 2 |
| -11 | 18  | -2 | 38.07  | 13.11 | 2 |
| -12 | 18  | -2 | -3.37  | 8.56  | 2 |
| -5  | -17 | 2  | 62.80  | 16.66 | 1 |
| -4  | -17 | 2  | 8.47   | 9.76  | 1 |
| -3  | -17 | 2  | 2.70   | 9.09  | 1 |
| -2  | -17 | 2  | 28.52  | 11.57 | 1 |
| -1  | -17 | 2  | 8.98   | 8.32  | 1 |
| 0   | -17 | 2  | 218.29 | 22.48 | 1 |
| 1   | -17 | 2  | 220.95 | 22.83 | 1 |
| 2   | -17 | 2  | 43.18  | 12.38 | 1 |
| 3   | -17 | 2  | 38.14  | 12.30 | 1 |
| -4  | 17  | -2 | 69.46  | 15.30 | 2 |
| 4   | -17 | 2  | 54.64  | 13.15 | 1 |
| 5   | -17 | 2  | 37.41  | 11.67 | 1 |
| -5  | 17  | -2 | 32.46  | 10.94 | 2 |
| 6   | -17 | 2  | 43.43  | 11.29 | 1 |
| -6  | 17  | -2 | 55.75  | 13.13 | 2 |
| -7  | 17  | -2 | 122.12 | 18.51 | 2 |
| 7   | -17 | 2  | 94.41  | 15.05 | 1 |
| -8  | 17  | -2 | 37.91  | 12.00 | 2 |
| -9  | 17  | -2 | 9.63   | 7.68  | 2 |
| -10 | 17  | -2 | 17.40  | 9.42  | 2 |
| -11 | 17  | -2 | 57.60  | 14.62 | 2 |

|     |     |    |        |       |   |
|-----|-----|----|--------|-------|---|
| -12 | 17  | -2 | 33.80  | 12.58 | 2 |
| -13 | 17  | -2 | 107.84 | 20.48 | 2 |
| -7  | -16 | 2  | 39.43  | 14.72 | 1 |
| -6  | -16 | 2  | 40.29  | 14.70 | 1 |
| -5  | -16 | 2  | -5.20  | 8.35  | 1 |
| -4  | -16 | 2  | -3.63  | 7.00  | 4 |
| -4  | -16 | 2  | 4.30   | 7.96  | 1 |
| -3  | -16 | 2  | 6.54   | 8.27  | 1 |
| -3  | -16 | 2  | 4.46   | 6.54  | 4 |
| -2  | -16 | 2  | 0.41   | 7.39  | 1 |
| -2  | -16 | 2  | 0.15   | 5.58  | 4 |
| -1  | -16 | 2  | 15.01  | 7.03  | 4 |
| -1  | -16 | 2  | 22.51  | 10.50 | 1 |
| 0   | -16 | 2  | 3.01   | 7.64  | 1 |
| 0   | -16 | 2  | 9.77   | 7.23  | 4 |
| 1   | -16 | 2  | 193.99 | 20.22 | 4 |
| 1   | -16 | 2  | 150.79 | 19.13 | 1 |
| 2   | -16 | 2  | 160.63 | 18.76 | 4 |
| 2   | -16 | 2  | 132.43 | 17.27 | 1 |
| 3   | -16 | 2  | 27.32  | 9.37  | 1 |
| 3   | -16 | 2  | 14.15  | 8.64  | 4 |
| -3  | 16  | -2 | 14.90  | 9.19  | 2 |
| -4  | 16  | -2 | -2.49  | 6.54  | 2 |
| 4   | -16 | 2  | -0.52  | 6.20  | 1 |
| 5   | -16 | 2  | 35.01  | 10.43 | 1 |
| -5  | 16  | -2 | 38.42  | 11.73 | 2 |
| 6   | -16 | 2  | 55.34  | 11.59 | 1 |
| -6  | 16  | -2 | 93.85  | 15.95 | 2 |
| 7   | -16 | 2  | 276.42 | 20.80 | 1 |
| -7  | 16  | -2 | 255.79 | 22.76 | 2 |
| -8  | 16  | -2 | 32.32  | 9.94  | 2 |
| -9  | 16  | -2 | 20.49  | 8.62  | 2 |
| -10 | 16  | -2 | 36.22  | 11.14 | 2 |
| -11 | 16  | -2 | 65.78  | 14.80 | 2 |
| -12 | 16  | -2 | 5.30   | 7.90  | 2 |
| -13 | 16  | -2 | 20.76  | 10.56 | 2 |
| -14 | 16  | -2 | 42.84  | 13.86 | 2 |
| -7  | -15 | 2  | -7.40  | 9.80  | 1 |
| -6  | -15 | 2  | -0.78  | 8.29  | 1 |
| -5  | -15 | 2  | -0.47  | 7.86  | 1 |
| -5  | -15 | 2  | 4.31   | 5.62  | 4 |
| -4  | -15 | 2  | 7.84   | 9.16  | 1 |
| -4  | -15 | 2  | 11.91  | 7.83  | 4 |
| -3  | -15 | 2  | -3.76  | 5.12  | 4 |
| -3  | -15 | 2  | -4.59  | 7.10  | 1 |
| -2  | -15 | 2  | 36.93  | 9.72  | 4 |

|     |     |    |        |       |   |
|-----|-----|----|--------|-------|---|
| -2  | -15 | 2  | 45.22  | 11.77 | 1 |
| -1  | -15 | 2  | 34.60  | 9.93  | 4 |
| -1  | -15 | 2  | 33.92  | 10.38 | 1 |
| 0   | -15 | 2  | 30.32  | 9.91  | 4 |
| 0   | -15 | 2  | 38.71  | 10.82 | 1 |
| 1   | -15 | 2  | 231.55 | 19.85 | 4 |
| 1   | -15 | 2  | 262.45 | 20.81 | 1 |
| 2   | -15 | 2  | 11.44  | 7.24  | 1 |
| -2  | 15  | -2 | 2.05   | 6.66  | 2 |
| 2   | -15 | 2  | 2.87   | 6.65  | 4 |
| -3  | 15  | -2 | 6.49   | 6.33  | 2 |
| 3   | -15 | 2  | -1.08  | 6.16  | 1 |
| 3   | -15 | 2  | 6.00   | 6.21  | 4 |
| 4   | -15 | 2  | 6.22   | 6.06  | 1 |
| 4   | -15 | 2  | 12.93  | 7.29  | 4 |
| -4  | 15  | -2 | 6.40   | 6.19  | 2 |
| -5  | 15  | -2 | 64.84  | 13.12 | 2 |
| 5   | -15 | 2  | 49.36  | 11.05 | 1 |
| 6   | -15 | 2  | 21.14  | 7.91  | 1 |
| -6  | 15  | -2 | 4.56   | 6.27  | 2 |
| -7  | 15  | -2 | 6.91   | 6.00  | 2 |
| 7   | -15 | 2  | 10.62  | 7.30  | 1 |
| -8  | 15  | -2 | 124.64 | 17.75 | 2 |
| -9  | 15  | -2 | 5.13   | 6.43  | 2 |
| -10 | 15  | -2 | 210.84 | 22.82 | 2 |
| -11 | 15  | -2 | 115.24 | 17.99 | 2 |
| -12 | 15  | -2 | -3.10  | 6.02  | 2 |
| -13 | 15  | -2 | 21.36  | 10.11 | 2 |
| -14 | 15  | -2 | 24.25  | 11.15 | 2 |
| -7  | -14 | 2  | 13.56  | 9.02  | 1 |
| -6  | -14 | 2  | -5.67  | 8.49  | 1 |
| -6  | -14 | 2  | 8.67   | 7.79  | 4 |
| -5  | -14 | 2  | 42.62  | 12.01 | 1 |
| -5  | -14 | 2  | 30.26  | 9.62  | 4 |
| -4  | -14 | 2  | -2.80  | 7.26  | 1 |
| -4  | -14 | 2  | -4.02  | 5.68  | 4 |
| -3  | -14 | 2  | 54.24  | 10.83 | 4 |
| -3  | -14 | 2  | 53.34  | 11.67 | 1 |
| -2  | -14 | 2  | 112.64 | 15.02 | 1 |
| -2  | -14 | 2  | 94.22  | 13.56 | 4 |
| -1  | -14 | 2  | 598.22 | 31.65 | 4 |
| -1  | -14 | 2  | 613.19 | 32.25 | 1 |
| 0   | -14 | 2  | 105.68 | 14.29 | 1 |
| 0   | -14 | 2  | 133.99 | 15.67 | 4 |
| 1   | -14 | 2  | 49.27  | 10.58 | 4 |
| 1   | -14 | 2  | 58.11  | 11.19 | 1 |

|     |     |    |        |       |   |
|-----|-----|----|--------|-------|---|
| -2  | 14  | -2 | 108.79 | 16.05 | 2 |
| 2   | -14 | 2  | 71.01  | 12.01 | 1 |
| 2   | -14 | 2  | 111.46 | 14.15 | 4 |
| 3   | -14 | 2  | 20.30  | 7.73  | 1 |
| 3   | -14 | 2  | 18.01  | 7.62  | 4 |
| -3  | 14  | -2 | 14.68  | 7.91  | 2 |
| 4   | -14 | 2  | 15.93  | 7.07  | 4 |
| 4   | -14 | 2  | 17.12  | 7.51  | 1 |
| -4  | 14  | -2 | 8.17   | 6.25  | 2 |
| 5   | -14 | 2  | 207.91 | 16.93 | 4 |
| -5  | 14  | -2 | 173.09 | 18.82 | 2 |
| 5   | -14 | 2  | 194.76 | 16.69 | 1 |
| 6   | -14 | 2  | 3.63   | 5.49  | 1 |
| -6  | 14  | -2 | 2.93   | 5.16  | 2 |
| -7  | 14  | -2 | 19.85  | 7.24  | 2 |
| 7   | -14 | 2  | 20.68  | 7.19  | 1 |
| -8  | 14  | -2 | 86.08  | 14.49 | 2 |
| -9  | 14  | -2 | 6.70   | 5.63  | 2 |
| -10 | 14  | -2 | -1.90  | 5.26  | 2 |
| -11 | 14  | -2 | 58.45  | 12.90 | 2 |
| -12 | 14  | -2 | 85.76  | 15.26 | 2 |
| -13 | 14  | -2 | 2.49   | 6.43  | 2 |
| -14 | 14  | -2 | 3.00   | 7.90  | 2 |
| -15 | 14  | -2 | 17.63  | 10.05 | 2 |
| -10 | -13 | 2  | 12.83  | 18.21 | 2 |
| -7  | -13 | 2  | 23.37  | 9.35  | 4 |
| -7  | -13 | 2  | 21.15  | 10.89 | 1 |
| -6  | -13 | 2  | 6.66   | 6.98  | 4 |
| -6  | -13 | 2  | 0.28   | 7.89  | 1 |
| -5  | -13 | 2  | 6.51   | 7.01  | 1 |
| -5  | -13 | 2  | 3.62   | 5.88  | 4 |
| -4  | -13 | 2  | 54.09  | 9.89  | 4 |
| -4  | -13 | 2  | 57.04  | 11.28 | 1 |
| -3  | -13 | 2  | 17.30  | 6.50  | 4 |
| -3  | -13 | 2  | 19.70  | 7.78  | 1 |
| -2  | -13 | 2  | -3.31  | 3.10  | 4 |
| -2  | -13 | 2  | -3.08  | 4.65  | 1 |
| -1  | -13 | 2  | 33.26  | 8.14  | 1 |
| -1  | -13 | 2  | 30.47  | 7.02  | 4 |
| 0   | -13 | 2  | -1.04  | 4.80  | 1 |
| 0   | -13 | 2  | 3.06   | 4.96  | 4 |
| 1   | -13 | 2  | 226.49 | 17.38 | 4 |
| -1  | 13  | -2 | 212.87 | 18.26 | 2 |
| 1   | -13 | 2  | 240.26 | 18.10 | 1 |
| 2   | -13 | 2  | -12.05 | 3.75  | 4 |
| 2   | -13 | 2  | -0.38  | 4.94  | 1 |

|     |     |    |        |       |   |
|-----|-----|----|--------|-------|---|
| -2  | 13  | -2 | -0.71  | 5.80  | 2 |
| 3   | -13 | 2  | 289.63 | 19.29 | 4 |
| -3  | 13  | -2 | 260.45 | 20.31 | 2 |
| 3   | -13 | 2  | 303.55 | 19.80 | 1 |
| 4   | -13 | 2  | 35.29  | 8.42  | 4 |
| -4  | 13  | -2 | 53.43  | 11.13 | 2 |
| 4   | -13 | 2  | 59.26  | 10.39 | 1 |
| 5   | -13 | 2  | 26.49  | 7.72  | 1 |
| -5  | 13  | -2 | 29.40  | 8.46  | 2 |
| 5   | -13 | 2  | 38.06  | 8.09  | 4 |
| -6  | 13  | -2 | 19.44  | 7.12  | 2 |
| 6   | -13 | 2  | 21.08  | 6.96  | 1 |
| 7   | -13 | 2  | -3.42  | 4.14  | 1 |
| -7  | 13  | -2 | 1.65   | 3.45  | 2 |
| -8  | 13  | -2 | 37.81  | 10.08 | 2 |
| -9  | 13  | -2 | 92.06  | 14.66 | 2 |
| -10 | 13  | -2 | 97.29  | 15.38 | 2 |
| -11 | 13  | -2 | -3.15  | 4.83  | 2 |
| -12 | 13  | -2 | 6.97   | 7.05  | 2 |
| -13 | 13  | -2 | 22.98  | 9.31  | 2 |
| -14 | 13  | -2 | -6.73  | 6.53  | 2 |
| -15 | 13  | -2 | 0.32   | 7.16  | 2 |
| -10 | -12 | 2  | 5.30   | 12.05 | 2 |
| -8  | -12 | 2  | 16.92  | 9.07  | 4 |
| -8  | -12 | 2  | -2.13  | 8.83  | 1 |
| -7  | -12 | 2  | 31.39  | 9.81  | 1 |
| -7  | -12 | 2  | 12.90  | 6.45  | 4 |
| -6  | -12 | 2  | 34.73  | 8.68  | 4 |
| -6  | -12 | 2  | 24.97  | 8.48  | 1 |
| -5  | -12 | 2  | 123.01 | 14.77 | 4 |
| -5  | -12 | 2  | 112.76 | 15.10 | 1 |
| -4  | -12 | 2  | 20.35  | 7.59  | 1 |
| -4  | -12 | 2  | 20.55  | 6.66  | 4 |
| -3  | -12 | 2  | 16.57  | 7.32  | 1 |
| -3  | -12 | 2  | 26.43  | 7.47  | 4 |
| -2  | -12 | 2  | 70.21  | 10.63 | 4 |
| -2  | -12 | 2  | 81.80  | 12.05 | 1 |
| -1  | -12 | 2  | 107.80 | 12.66 | 4 |
| -1  | -12 | 2  | 110.10 | 13.31 | 1 |
| 0   | -12 | 2  | 146.46 | 14.62 | 1 |
| 0   | -12 | 2  | 131.23 | 13.83 | 4 |
| -1  | 12  | -2 | 3.60   | 5.47  | 2 |
| 1   | -12 | 2  | 0.79   | 4.10  | 4 |
| 1   | -12 | 2  | -6.74  | 3.60  | 1 |
| -2  | 12  | -2 | 1.33   | 4.26  | 2 |
| 2   | -12 | 2  | 1.07   | 3.81  | 4 |

|     |     |    |        |       |   |
|-----|-----|----|--------|-------|---|
| 2   | -12 | 2  | 0.73   | 4.32  | 1 |
| -3  | 12  | -2 | 31.28  | 8.61  | 2 |
| 3   | -12 | 2  | 34.70  | 7.55  | 4 |
| 3   | -12 | 2  | 33.67  | 7.31  | 1 |
| -4  | 12  | -2 | 276.92 | 20.01 | 2 |
| 4   | -12 | 2  | 294.44 | 18.02 | 1 |
| 4   | -12 | 2  | 271.13 | 17.65 | 4 |
| 5   | -12 | 2  | 18.71  | 5.68  | 4 |
| 5   | -12 | 2  | 42.58  | 8.16  | 1 |
| -5  | 12  | -2 | 22.81  | 7.06  | 2 |
| 6   | -12 | 2  | 8.81   | 5.01  | 1 |
| 6   | -12 | 2  | 3.09   | 4.48  | 4 |
| -6  | 12  | -2 | 11.92  | 6.01  | 2 |
| -7  | 12  | -2 | 42.58  | 9.41  | 2 |
| -8  | 12  | -2 | 173.35 | 17.81 | 2 |
| -9  | 12  | -2 | 131.06 | 16.74 | 2 |
| -10 | 12  | -2 | 36.73  | 9.97  | 2 |
| -11 | 12  | -2 | 50.57  | 12.29 | 2 |
| -12 | 12  | -2 | -3.43  | 5.01  | 2 |
| -13 | 12  | -2 | -0.96  | 4.94  | 2 |
| -14 | 12  | -2 | 156.78 | 21.23 | 2 |
| -15 | 12  | -2 | 47.44  | 13.29 | 2 |
| -16 | 12  | -2 | 21.35  | 10.44 | 2 |
| -10 | -11 | 2  | 107.21 | 21.36 | 2 |
| -8  | -11 | 2  | -8.24  | 6.42  | 1 |
| -8  | -11 | 2  | -2.57  | 5.62  | 4 |
| -7  | -11 | 2  | 53.97  | 9.83  | 4 |
| -7  | -11 | 2  | 45.71  | 10.07 | 1 |
| -6  | -11 | 2  | 70.50  | 12.20 | 1 |
| -6  | -11 | 2  | 53.61  | 10.24 | 4 |
| -5  | -11 | 2  | 92.21  | 13.35 | 1 |
| -5  | -11 | 2  | 88.17  | 12.22 | 4 |
| -4  | -11 | 2  | 131.22 | 14.52 | 1 |
| -4  | -11 | 2  | 122.51 | 13.62 | 4 |
| -3  | -11 | 2  | 383.32 | 22.37 | 4 |
| -3  | -11 | 2  | 417.58 | 23.65 | 1 |
| -2  | -11 | 2  | 134.99 | 13.99 | 1 |
| -2  | -11 | 2  | 168.11 | 13.66 | 4 |
| -1  | -11 | 2  | 28.64  | 6.51  | 4 |
| -1  | -11 | 2  | 31.78  | 7.52  | 1 |
| 0   | -11 | 2  | 27.80  | 6.84  | 4 |
| 0   | -11 | 2  | 39.59  | 7.56  | 1 |
| 1   | -11 | 2  | 373.46 | 21.00 | 4 |
| -1  | 11  | -2 | 430.73 | 23.64 | 2 |
| 1   | -11 | 2  | 362.18 | 20.58 | 1 |
| 2   | -11 | 2  | 522.98 | 25.56 | 1 |



|     |     |    |        |       |   |
|-----|-----|----|--------|-------|---|
| 2   | -11 | 2  | 523.02 | 25.39 | 4 |
| -2  | 11  | -2 | 557.65 | 27.97 | 2 |
| 3   | -11 | 2  | 9.04   | 4.60  | 4 |
| 3   | -11 | 2  | 22.80  | 6.16  | 1 |
| -3  | 11  | -2 | 21.15  | 6.11  | 2 |
| 4   | -11 | 2  | 52.86  | 8.17  | 4 |
| 4   | -11 | 2  | 50.35  | 8.13  | 1 |
| -4  | 11  | -2 | 64.36  | 10.08 | 2 |
| -5  | 11  | -2 | 12.63  | 5.61  | 2 |
| 5   | -11 | 2  | 8.66   | 4.82  | 4 |
| 5   | -11 | 2  | 9.25   | 4.73  | 1 |
| -6  | 11  | -2 | 29.33  | 8.02  | 2 |
| 6   | -11 | 2  | 28.85  | 6.97  | 4 |
| 6   | -11 | 2  | 40.14  | 7.68  | 1 |
| 7   | -11 | 2  | 221.51 | 14.05 | 1 |
| -7  | 11  | -2 | 229.67 | 18.14 | 2 |
| -8  | 11  | -2 | 214.70 | 17.82 | 2 |
| -9  | 11  | -2 | 28.76  | 8.45  | 2 |
| -10 | 11  | -2 | 58.18  | 12.14 | 2 |
| -11 | 11  | -2 | 0.64   | 5.42  | 2 |
| -12 | 11  | -2 | 16.06  | 8.01  | 2 |
| -13 | 11  | -2 | 17.97  | 7.80  | 2 |
| -14 | 11  | -2 | 52.37  | 12.62 | 2 |
| -15 | 11  | -2 | 82.67  | 16.18 | 2 |
| -16 | 11  | -2 | 29.21  | 10.68 | 2 |
| -11 | -10 | 2  | 15.19  | 9.70  | 2 |
| -10 | -10 | 2  | 3.01   | 8.14  | 2 |
| -9  | -10 | 2  | 114.40 | 19.69 | 2 |
| -8  | -10 | 2  | 254.81 | 19.04 | 4 |
| -8  | -10 | 2  | 283.10 | 21.08 | 1 |
| -7  | -10 | 2  | 546.74 | 28.47 | 4 |
| -7  | -10 | 2  | 511.72 | 28.68 | 1 |
| -6  | -10 | 2  | 1.75   | 4.17  | 4 |
| -6  | -10 | 2  | 9.31   | 5.83  | 1 |
| -5  | -10 | 2  | 10.05  | 5.58  | 1 |
| -5  | -10 | 2  | -0.09  | 4.27  | 4 |
| -4  | -10 | 2  | 197.47 | 14.77 | 4 |
| -4  | -10 | 2  | 186.06 | 15.15 | 1 |
| 0   | 10  | -2 | 108.08 | 12.25 | 2 |
| -1  | 10  | -2 | 95.84  | 11.64 | 2 |
| 2   | -10 | 2  | 3.18   | 3.93  | 4 |
| 2   | -10 | 2  | 6.90   | 4.10  | 1 |
| -2  | 10  | -2 | 5.20   | 3.82  | 2 |
| 3   | -10 | 2  | 16.03  | 5.27  | 4 |
| -3  | 10  | -2 | 14.22  | 5.11  | 2 |
| 3   | -10 | 2  | 11.61  | 4.58  | 1 |

|     |     |    |        |       |   |
|-----|-----|----|--------|-------|---|
| 4   | -10 | 2  | 20.97  | 5.26  | 4 |
| 4   | -10 | 2  | 13.64  | 4.48  | 1 |
| -4  | 10  | -2 | 15.41  | 5.49  | 2 |
| -5  | 10  | -2 | 441.74 | 23.86 | 2 |
| 5   | -10 | 2  | 407.17 | 20.02 | 4 |
| 5   | -10 | 2  | 403.43 | 19.94 | 1 |
| -6  | 10  | -2 | 208.38 | 16.43 | 2 |
| -7  | 10  | -2 | 255.99 | 18.27 | 2 |
| 7   | -10 | 2  | 263.89 | 14.37 | 1 |
| -8  | 10  | -2 | 503.32 | 28.55 | 2 |
| -9  | 10  | -2 | 182.19 | 16.65 | 2 |
| -10 | 10  | -2 | 179.43 | 18.70 | 2 |
| -11 | 10  | -2 | -3.77  | 3.73  | 2 |
| -12 | 10  | -2 | 3.95   | 5.07  | 2 |
| -13 | 10  | -2 | 142.93 | 18.72 | 2 |
| -14 | 10  | -2 | 32.23  | 9.79  | 2 |
| -15 | 10  | -2 | 4.16   | 6.68  | 2 |
| -16 | 10  | -2 | 18.02  | 8.93  | 2 |
| -11 | -9  | 2  | 5.11   | 7.13  | 2 |
| -10 | -9  | 2  | 36.68  | 11.32 | 2 |
| -9  | -9  | 2  | 4.16   | 5.94  | 2 |
| -8  | -9  | 2  | 281.15 | 19.11 | 4 |
| -8  | -9  | 2  | 317.98 | 21.48 | 1 |
| -7  | -9  | 2  | 26.38  | 7.05  | 4 |
| -7  | -9  | 2  | 3.55   | 5.29  | 1 |
| -6  | -9  | 2  | 47.14  | 8.95  | 1 |
| -6  | -9  | 2  | 58.50  | 9.69  | 4 |
| 4   | 9   | -2 | 126.19 | 12.95 | 1 |
| 3   | 9   | -2 | 60.48  | 9.40  | 1 |
| 2   | 9   | -2 | 10.36  | 4.71  | 1 |
| 1   | 9   | -2 | 692.88 | 30.11 | 1 |
| 0   | 9   | -2 | 851.11 | 35.43 | 2 |
| 0   | 9   | -2 | 862.73 | 34.49 | 1 |
| -1  | 9   | -2 | 89.85  | 10.32 | 2 |
| -1  | 9   | -2 | 65.30  | 8.48  | 1 |
| -2  | 9   | -2 | 176.42 | 13.15 | 2 |
| -2  | 9   | -2 | 173.23 | 12.18 | 1 |
| 3   | -9  | 2  | 66.97  | 7.99  | 1 |
| 3   | -9  | 2  | 82.17  | 8.72  | 4 |
| -3  | 9   | -2 | 61.12  | 9.11  | 2 |
| -4  | 9   | -2 | 29.45  | 3.68  | 3 |
| 4   | -9  | 2  | 33.83  | 5.99  | 1 |
| -4  | 9   | -2 | 32.54  | 7.07  | 2 |
| 4   | -9  | 2  | 35.95  | 6.16  | 4 |
| -5  | 9   | -2 | 335.87 | 14.41 | 3 |
| -5  | 9   | -2 | 294.95 | 18.99 | 2 |

|     |    |    |         |       |   |
|-----|----|----|---------|-------|---|
| 6   | -9 | 2  | 228.56  | 13.18 | 4 |
| 6   | -9 | 2  | 235.59  | 13.24 | 1 |
| -6  | 9  | -2 | 203.11  | 15.68 | 2 |
| -6  | 9  | -2 | 242.59  | 12.63 | 3 |
| -7  | 9  | -2 | 49.74   | 7.00  | 3 |
| -7  | 9  | -2 | 70.92   | 10.95 | 2 |
| 7   | -9 | 2  | 67.61   | 7.03  | 1 |
| -8  | 9  | -2 | 80.19   | 11.97 | 2 |
| -8  | 9  | -2 | 84.51   | 8.92  | 3 |
| -9  | 9  | -2 | 29.44   | 8.27  | 2 |
| -9  | 9  | -2 | 14.95   | 5.69  | 3 |
| -10 | 9  | -2 | 0.41    | 3.87  | 3 |
| -10 | 9  | -2 | 2.45    | 4.21  | 2 |
| -11 | 9  | -2 | 152.80  | 15.26 | 3 |
| -11 | 9  | -2 | 180.46  | 18.51 | 2 |
| -12 | 9  | -2 | 39.37   | 9.95  | 3 |
| -12 | 9  | -2 | 22.35   | 7.97  | 2 |
| -13 | 9  | -2 | 30.59   | 9.79  | 2 |
| -13 | 9  | -2 | 36.06   | 10.01 | 3 |
| -14 | 9  | -2 | -4.66   | 6.57  | 3 |
| -14 | 9  | -2 | -1.51   | 5.49  | 2 |
| -15 | 9  | -2 | 1.45    | 6.72  | 2 |
| -15 | 9  | -2 | 10.93   | 8.97  | 3 |
| -16 | 9  | -2 | 3.18    | 7.89  | 2 |
| -11 | -8 | 2  | 6.58    | 7.72  | 2 |
| -10 | -8 | 2  | 85.32   | 15.14 | 2 |
| -9  | -8 | 2  | 96.24   | 15.35 | 2 |
| -8  | -8 | 2  | 41.83   | 8.33  | 4 |
| -8  | -8 | 2  | 39.53   | 9.12  | 1 |
| -7  | -8 | 2  | 177.63  | 13.65 | 4 |
| -7  | -8 | 2  | 145.59  | 14.02 | 1 |
| 5   | 8  | -2 | 61.83   | 9.49  | 1 |
| 4   | 8  | -2 | 167.52  | 13.16 | 1 |
| 3   | 8  | -2 | 215.47  | 14.95 | 1 |
| 2   | 8  | -2 | 25.92   | 6.10  | 1 |
| 1   | 8  | -2 | 1376.31 | 48.42 | 1 |
| 0   | 8  | -2 | 1.75    | 2.33  | 1 |
| 0   | 8  | -2 | 3.17    | 2.67  | 2 |
| -1  | 8  | -2 | 203.81  | 13.32 | 2 |
| -1  | 8  | -2 | 217.98  | 13.15 | 1 |
| -2  | 8  | -2 | 14.64   | 4.34  | 2 |
| -2  | 8  | -2 | 12.47   | 3.74  | 1 |
| -3  | 8  | -2 | 327.03  | 16.38 | 1 |
| -3  | 8  | -2 | 334.83  | 18.00 | 2 |
| -3  | 8  | -2 | 341.85  | 12.47 | 3 |
| -4  | 8  | -2 | 37.22   | 3.97  | 3 |

|     |    |    |         |        |   |
|-----|----|----|---------|--------|---|
| 4   | -8 | 2  | 45.55   | 5.97   | 1 |
| 4   | -8 | 2  | 42.96   | 6.13   | 4 |
| -4  | 8  | -2 | 39.79   | 7.38   | 2 |
| -5  | 8  | -2 | 12.22   | 4.94   | 2 |
| 5   | -8 | 2  | 9.91    | 3.50   | 4 |
| 5   | -8 | 2  | 6.52    | 3.03   | 1 |
| -5  | 8  | -2 | 6.75    | 2.84   | 3 |
| -6  | 8  | -2 | 1771.10 | 62.82  | 2 |
| 6   | -8 | 2  | 1753.34 | 54.98  | 1 |
| 6   | -8 | 2  | 1698.28 | 54.47  | 4 |
| -6  | 8  | -2 | 1738.36 | 56.03  | 3 |
| 7   | -8 | 2  | 77.69   | 6.76   | 1 |
| -7  | 8  | -2 | 91.80   | 8.82   | 3 |
| -7  | 8  | -2 | 74.98   | 10.75  | 2 |
| -8  | 8  | -2 | 337.75  | 17.95  | 3 |
| -8  | 8  | -2 | 302.27  | 19.97  | 2 |
| -9  | 8  | -2 | 59.26   | 10.84  | 2 |
| -10 | 8  | -2 | 95.81   | 11.64  | 3 |
| -10 | 8  | -2 | 81.53   | 12.69  | 2 |
| -11 | 8  | -2 | 34.25   | 8.41   | 3 |
| -11 | 8  | -2 | 46.73   | 10.31  | 2 |
| -12 | 8  | -2 | 103.71  | 15.55  | 2 |
| -12 | 8  | -2 | 137.55  | 15.81  | 3 |
| -13 | 8  | -2 | 28.08   | 9.15   | 2 |
| -13 | 8  | -2 | 28.43   | 9.26   | 3 |
| -14 | 8  | -2 | 12.81   | 8.17   | 3 |
| -14 | 8  | -2 | 3.85    | 6.00   | 2 |
| -15 | 8  | -2 | 94.12   | 16.25  | 3 |
| -15 | 8  | -2 | 106.03  | 17.66  | 2 |
| -16 | 8  | -2 | 46.65   | 13.47  | 3 |
| -16 | 8  | -2 | 46.66   | 12.62  | 2 |
| -11 | -7 | 2  | 0.99    | 4.86   | 2 |
| -10 | -7 | 2  | 328.83  | 24.34  | 2 |
| -9  | -7 | 2  | 40.58   | 9.27   | 2 |
| -8  | -7 | 2  | 263.77  | 17.86  | 1 |
| -8  | -7 | 2  | 280.21  | 20.40  | 2 |
| -8  | -7 | 2  | 262.43  | 17.01  | 4 |
| 7   | 7  | -2 | 98.44   | 11.22  | 1 |
| 6   | 7  | -2 | 19.00   | 6.09   | 1 |
| 5   | 7  | -2 | 323.16  | 18.26  | 1 |
| 4   | 7  | -2 | 1204.98 | 44.02  | 1 |
| 3   | 7  | -2 | 3541.92 | 107.47 | 1 |
| 2   | 7  | -2 | 683.38  | 27.65  | 1 |
| 1   | 7  | -2 | 39.44   | 6.08   | 1 |
| 0   | 7  | -2 | 1.20    | 2.61   | 2 |
| 0   | 7  | -2 | 1.99    | 2.12   | 1 |

-1 7 -2 214.11 12.89 2  
-1 7 -2 202.60 11.95 1  
-2 7 -2 96.74 7.97 1  
-2 7 -2 110.46 8.99 2  
-3 7 -2 444.18 21.17 2  
-3 7 -2 452.23 19.18 1  
-3 7 -2 467.34 15.73 3  
-4 7 -2 1697.19 60.70 2  
-4 7 -2 1886.15 55.00 3  
-5 7 -2 6.46 3.28 2  
5 -7 2 4.84 2.52 1  
-5 7 -2 6.28 2.43 3  
5 -7 2 2.85 2.80 4  
-6 7 -2 462.39 23.45 2  
-6 7 -2 472.44 20.09 3  
6 -7 2 466.37 18.29 1  
6 -7 2 459.31 18.23 4  
-7 7 -2 43.30 8.59 2  
-7 7 -2 43.74 6.46 3  
7 -7 2 47.12 4.64 1  
-8 7 -2 68.41 10.87 2  
-9 7 -2 1849.29 67.45 2  
-9 7 -2 1726.13 62.08 3  
-10 7 -2 1400.96 57.59 2  
-10 7 -2 1475.13 54.56 3  
-11 7 -2 152.29 15.27 3  
-11 7 -2 126.76 15.59 2  
-12 7 -2 3.75 5.26 2  
-12 7 -2 2.97 5.51 3  
-13 7 -2 95.99 14.50 3  
-13 7 -2 122.24 16.85 2  
-14 7 -2 8.69 7.83 3  
-14 7 -2 12.35 7.06 2  
-15 7 -2 134.38 19.00 3  
-15 7 -2 149.58 19.83 2  
-16 7 -2 -4.81 6.41 2  
-16 7 -2 -3.87 6.74 3  
-12 -6 2 215.87 22.11 2  
-11 -6 2 1.94 5.59 2  
-10 -6 2 1.69 4.76 2  
-9 -6 2 231.15 18.14 2  
8 6 -2 8.95 5.03 1  
-8 -6 2 11.71 5.56 2  
6 6 -2 34.62 6.89 1  
5 6 -2 226.25 13.86 1  
4 6 -2 43.41 6.55 1

|     |    |    |        |       |   |
|-----|----|----|--------|-------|---|
| 3   | 6  | -2 | 4.33   | 2.67  | 1 |
| 2   | 6  | -2 | 359.92 | 17.19 | 1 |
| 1   | 6  | -2 | 725.11 | 28.04 | 1 |
| 1   | 6  | -2 | 785.85 | 29.13 | 2 |
| 0   | 6  | -2 | 25.34  | 4.55  | 2 |
| 0   | 6  | -2 | 28.97  | 4.75  | 1 |
| -1  | 6  | -2 | 438.27 | 19.22 | 2 |
| -1  | 6  | -2 | 449.67 | 18.57 | 1 |
| -2  | 6  | -2 | 26.05  | 4.94  | 2 |
| -2  | 6  | -2 | 24.96  | 4.19  | 1 |
| -3  | 6  | -2 | 3.00   | 2.45  | 2 |
| -3  | 6  | -2 | 2.43   | 1.99  | 1 |
| -3  | 6  | -2 | 2.29   | 1.45  | 3 |
| -4  | 6  | -2 | 136.69 | 8.27  | 1 |
| -4  | 6  | -2 | 155.90 | 10.87 | 2 |
| -4  | 6  | -2 | 126.85 | 7.51  | 3 |
| 5   | -6 | 2  | 250.10 | 11.08 | 4 |
| -5  | 6  | -2 | 211.21 | 14.09 | 2 |
| 5   | -6 | 2  | 248.42 | 11.09 | 1 |
| 6   | -6 | 2  | 59.49  | 5.07  | 4 |
| 6   | -6 | 2  | 63.29  | 5.17  | 1 |
| -6  | 6  | -2 | 51.15  | 8.25  | 2 |
| -7  | 6  | -2 | 211.79 | 15.39 | 2 |
| 7   | -6 | 2  | 218.51 | 9.43  | 1 |
| -8  | 6  | -2 | 5.11   | 4.51  | 2 |
| -9  | 6  | -2 | 437.64 | 25.06 | 2 |
| -10 | 6  | -2 | 102.81 | 13.21 | 2 |
| -11 | 6  | -2 | 177.64 | 17.59 | 2 |
| -12 | 6  | -2 | 29.30  | 8.16  | 2 |
| -13 | 6  | -2 | 77.91  | 13.54 | 3 |
| -13 | 6  | -2 | 83.95  | 14.23 | 2 |
| -14 | 6  | -2 | 4.50   | 5.60  | 2 |
| -14 | 6  | -2 | 3.24   | 7.16  | 3 |
| -15 | 6  | -2 | 8.46   | 6.60  | 2 |
| -15 | 6  | -2 | 25.54  | 10.20 | 3 |
| -16 | 6  | -2 | 213.19 | 23.91 | 2 |
| -16 | 6  | -2 | 289.77 | 25.34 | 3 |
| -15 | -5 | 2  | 13.16  | 11.18 | 3 |
| -12 | -5 | 2  | 10.92  | 6.47  | 2 |
| -11 | -5 | 2  | 102.54 | 14.65 | 2 |
| -10 | -5 | 2  | 153.73 | 16.29 | 2 |
| -9  | -5 | 2  | 33.88  | 8.04  | 2 |
| -8  | -5 | 2  | 3.77   | 3.88  | 2 |
| 8   | 5  | -2 | 2.31   | 3.38  | 1 |
| -7  | -5 | 2  | 45.12  | 8.41  | 2 |
| 7   | 5  | -2 | 40.44  | 6.66  | 1 |

|     |    |    |         |       |   |
|-----|----|----|---------|-------|---|
| 5   | 5  | -2 | 1264.68 | 43.34 | 1 |
| 4   | 5  | -2 | 0.41    | 2.32  | 1 |
| 3   | 5  | -2 | 196.62  | 11.50 | 1 |
| 2   | 5  | -2 | 1532.53 | 49.26 | 1 |
| 1   | 5  | -2 | 66.55   | 5.92  | 2 |
| 1   | 5  | -2 | 57.82   | 6.05  | 1 |
| 0   | 5  | -2 | -0.28   | 1.50  | 2 |
| 0   | 5  | -2 | 3.73    | 2.18  | 1 |
| -1  | 5  | -2 | 144.00  | 8.44  | 1 |
| -1  | 5  | -2 | 147.11  | 8.92  | 2 |
| -2  | 5  | -2 | 1.29    | 1.48  | 1 |
| -2  | 5  | -2 | 4.57    | 2.33  | 2 |
| -3  | 5  | -2 | 751.07  | 25.74 | 1 |
| -3  | 5  | -2 | 795.79  | 29.29 | 2 |
| -4  | 5  | -2 | 75.03   | 7.96  | 2 |
| -4  | 5  | -2 | 81.26   | 5.65  | 1 |
| -5  | 5  | -2 | 7.70    | 3.15  | 2 |
| 5   | -5 | 2  | 3.19    | 1.66  | 1 |
| 5   | -5 | 2  | 5.15    | 2.03  | 4 |
| -6  | 5  | -2 | 15.62   | 4.52  | 2 |
| 6   | -5 | 2  | 23.40   | 2.67  | 1 |
| -7  | 5  | -2 | 1663.02 | 59.55 | 2 |
| -8  | 5  | -2 | 467.24  | 24.80 | 2 |
| -9  | 5  | -2 | 102.64  | 12.37 | 2 |
| -10 | 5  | -2 | 365.35  | 22.76 | 2 |
| -11 | 5  | -2 | 14.09   | 5.97  | 2 |
| -12 | 5  | -2 | 178.85  | 17.97 | 2 |
| -13 | 5  | -2 | 0.65    | 4.35  | 2 |
| -14 | 5  | -2 | 223.29  | 20.38 | 2 |
| -15 | 5  | -2 | 5.85    | 7.09  | 2 |
| -15 | 5  | -2 | 5.42    | 7.70  | 3 |
| -16 | 5  | -2 | 5.83    | 8.14  | 3 |
| -16 | 5  | -2 | 2.54    | 5.88  | 2 |
| -15 | -4 | 2  | 27.75   | 11.63 | 3 |
| -12 | -4 | 2  | 76.75   | 12.51 | 2 |
| -11 | -4 | 2  | 285.85  | 20.14 | 2 |
| -10 | -4 | 2  | -2.15   | 3.23  | 2 |
| -9  | -4 | 2  | 15.71   | 5.82  | 2 |
| 8   | 4  | -2 | 4.47    | 3.10  | 1 |
| -8  | -4 | 2  | 2.60    | 3.53  | 2 |
| 7   | 4  | -2 | 3.57    | 3.10  | 1 |
| -7  | -4 | 2  | 8.51    | 3.75  | 2 |
| 6   | 4  | -2 | 9.92    | 3.55  | 1 |
| 4   | 4  | -2 | 224.30  | 12.06 | 1 |
| 3   | 4  | -2 | 528.16  | 20.68 | 1 |
| 2   | 4  | -2 | 34.13   | 4.46  | 1 |

|     |    |    |         |       |   |
|-----|----|----|---------|-------|---|
| 1   | 4  | -2 | 514.65  | 19.28 | 2 |
| 1   | 4  | -2 | 505.14  | 19.18 | 1 |
| 0   | 4  | -2 | 458.77  | 17.72 | 2 |
| 0   | 4  | -2 | 466.39  | 17.54 | 1 |
| -1  | 4  | -2 | 360.60  | 15.17 | 2 |
| -1  | 4  | -2 | 375.54  | 14.49 | 1 |
| -2  | 4  | -2 | 13.58   | 2.62  | 1 |
| -2  | 4  | -2 | 12.90   | 3.06  | 2 |
| -3  | 4  | -2 | 7.94    | 2.85  | 2 |
| -3  | 4  | -2 | 6.57    | 1.96  | 1 |
| -4  | 4  | -2 | 0.08    | 1.21  | 1 |
| -4  | 4  | -2 | -0.57   | 1.69  | 2 |
| 5   | -4 | 2  | 75.00   | 4.39  | 4 |
| 5   | -4 | 2  | 76.34   | 4.40  | 1 |
| -5  | 4  | -2 | 81.76   | 8.61  | 2 |
| -6  | 4  | -2 | 40.51   | 6.98  | 2 |
| -7  | 4  | -2 | 297.34  | 17.92 | 2 |
| -8  | 4  | -2 | 519.46  | 26.44 | 2 |
| -9  | 4  | -2 | 122.81  | 13.71 | 2 |
| -10 | 4  | -2 | 58.07   | 10.72 | 2 |
| -11 | 4  | -2 | 6.13    | 4.84  | 2 |
| -12 | 4  | -2 | 50.55   | 11.09 | 2 |
| -13 | 4  | -2 | 187.05  | 19.55 | 2 |
| -14 | 4  | -2 | 295.43  | 23.51 | 2 |
| -15 | 4  | -2 | 14.46   | 7.32  | 2 |
| -16 | 4  | -2 | 10.23   | 8.55  | 3 |
| -16 | 4  | -2 | 19.43   | 8.87  | 2 |
| -16 | -3 | 2  | 0.34    | 7.86  | 3 |
| -15 | -3 | 2  | 27.54   | 11.40 | 3 |
| -12 | -3 | 2  | 16.24   | 5.74  | 2 |
| -11 | -3 | 2  | 48.59   | 9.69  | 2 |
| -10 | -3 | 2  | 4.43    | 3.75  | 2 |
| -9  | -3 | 2  | 308.05  | 18.92 | 2 |
| 8   | 3  | -2 | 7.47    | 3.56  | 1 |
| -8  | -3 | 2  | -1.54   | 2.81  | 2 |
| 7   | 3  | -2 | 68.33   | 6.94  | 1 |
| -7  | -3 | 2  | 69.64   | 8.60  | 2 |
| 6   | 3  | -2 | 23.07   | 4.33  | 1 |
| -6  | -3 | 2  | 34.36   | 5.78  | 2 |
| 5   | 3  | -2 | 910.51  | 31.23 | 1 |
| 4   | 3  | -2 | 89.39   | 6.49  | 1 |
| 3   | 3  | -2 | 72.02   | 5.64  | 1 |
| 2   | 3  | -2 | 249.80  | 11.25 | 1 |
| 1   | 3  | -2 | 587.28  | 20.50 | 1 |
| -1  | -3 | 2  | 598.23  | 18.98 | 3 |
| 0   | 3  | -2 | 1468.31 | 44.37 | 1 |



|     |    |    |         |        |   |
|-----|----|----|---------|--------|---|
| 0   | 3  | -2 | 1492.10 | 45.16  | 2 |
| -1  | 3  | -2 | 523.72  | 17.61  | 1 |
| -1  | 3  | -2 | 515.96  | 18.73  | 2 |
| -2  | 3  | -2 | 318.35  | 11.65  | 1 |
| -2  | 3  | -2 | 315.17  | 13.85  | 2 |
| -3  | 3  | -2 | 1245.08 | 36.38  | 1 |
| -3  | 3  | -2 | 1224.74 | 41.18  | 2 |
| -4  | 3  | -2 | 245.17  | 8.94   | 1 |
| -4  | 3  | -2 | 269.10  | 14.09  | 2 |
| -5  | 3  | -2 | 1927.15 | 63.23  | 2 |
| -6  | 3  | -2 | 270.78  | 15.71  | 2 |
| -7  | 3  | -2 | 381.19  | 20.35  | 2 |
| -8  | 3  | -2 | 174.95  | 13.59  | 2 |
| -9  | 3  | -2 | 138.10  | 12.45  | 2 |
| -10 | 3  | -2 | 499.04  | 27.09  | 2 |
| -11 | 3  | -2 | 27.16   | 7.82   | 2 |
| -12 | 3  | -2 | 72.58   | 12.66  | 2 |
| -13 | 3  | -2 | 38.23   | 10.25  | 2 |
| -14 | 3  | -2 | 10.84   | 7.13   | 2 |
| -15 | 3  | -2 | 77.69   | 15.34  | 2 |
| -16 | 3  | -2 | 11.56   | 7.92   | 2 |
| -16 | -2 | 2  | 22.17   | 11.07  | 3 |
| -15 | -2 | 2  | 206.95  | 23.73  | 3 |
| -14 | -2 | 2  | 23.41   | 9.29   | 3 |
| -13 | -2 | 2  | 0.82    | 4.47   | 2 |
| -12 | -2 | 2  | 7.85    | 4.99   | 2 |
| -11 | -2 | 2  | 10.00   | 4.95   | 2 |
| -10 | -2 | 2  | 25.44   | 6.93   | 2 |
| -9  | -2 | 2  | 42.74   | 7.92   | 2 |
| -8  | -2 | 2  | 22.73   | 5.55   | 2 |
| 8   | 2  | -2 | 28.04   | 4.65   | 1 |
| -7  | -2 | 2  | 530.93  | 23.55  | 2 |
| 7   | 2  | -2 | 553.36  | 20.98  | 1 |
| -6  | -2 | 2  | 160.03  | 10.32  | 2 |
| 6   | 2  | -2 | 152.33  | 8.85   | 1 |
| -5  | -2 | 2  | 816.61  | 29.56  | 2 |
| 5   | 2  | -2 | 846.23  | 28.20  | 1 |
| 3   | 2  | -2 | 3.72    | 1.71   | 1 |
| -2  | -2 | 2  | 3017.66 | 86.75  | 3 |
| 2   | 2  | -2 | 2940.00 | 85.25  | 1 |
| 1   | 2  | -2 | 7531.60 | 208.47 | 1 |
| -1  | -2 | 2  | 7525.05 | 212.31 | 3 |
| 0   | 2  | -2 | 41.52   | 2.95   | 2 |
| -1  | 2  | -2 | 638.47  | 19.90  | 1 |
| -1  | 2  | -2 | 619.52  | 21.31  | 2 |
| -2  | 2  | -2 | 19.74   | 2.07   | 1 |

-2 2 -2 13.86 2.90 2  
-3 2 -2 86.89 6.70 2  
-4 2 -2 8.12 3.26 2  
-5 2 -2 236.30 13.68 2  
-6 2 -2 195.03 12.84 2  
-7 2 -2 116.59 11.39 2  
-8 2 -2 92.79 11.06 2  
-9 2 -2 66.72 10.33 2  
-10 2 -2 -0.29 3.39 2  
-11 2 -2 256.17 19.26 2  
-12 2 -2 309.95 22.17 2  
-13 2 -2 3.25 5.29 2  
-14 2 -2 1.13 5.89 2  
-15 2 -2 57.23 12.89 2  
-16 2 -2 2.57 7.65 2  
-16 -1 2 -2.16 8.21 3  
-15 -1 2 7.18 7.30 3  
-14 -1 2 90.54 15.13 3  
-13 -1 2 2.11 4.54 2  
-13 -1 2 0.90 5.38 3  
-12 -1 2 -1.63 2.96 2  
-11 -1 2 91.22 11.49 2  
-10 -1 2 415.79 22.43 2  
-9 -1 2 122.99 10.50 2  
8 1 -2 198.91 10.16 1  
-8 -1 2 184.89 12.45 2  
-7 -1 2 4.74 2.71 2  
7 1 -2 8.39 2.46 1  
6 1 -2 1515.40 45.53 1  
-6 -1 2 1447.54 48.43 2  
5 1 -2 280.79 11.55 1  
-5 -1 2 269.15 12.67 2  
-4 -1 2 331.38 13.25 2  
4 1 -2 323.81 12.62 1  
-3 -1 2 661.05 20.93 2  
-3 -1 2 611.70 22.45 3  
2 1 -2 678.74 21.52 1  
-2 -1 2 656.45 22.07 3  
-1 -1 2 77.33 4.04 3  
1 1 -2 67.11 4.11 1  
0 1 -2 248.57 9.18 1  
-1 1 -2 1.84 1.24 2  
-1 1 -2 2.33 1.09 1  
-2 1 -2 2077.92 63.02 2  
-3 1 -2 783.47 28.06 2  
-4 1 -2 393.37 17.64 2

-5 1 -2 285.81 15.30 2  
-6 1 -2 29.54 5.85 2  
-7 1 -2 579.92 26.79 2  
-8 1 -2 49.87 8.53 2  
-9 1 -2 194.94 15.18 2  
-10 1 -2 29.32 7.52 2  
-11 1 -2 53.48 10.62 2  
-12 1 -2 44.20 10.48 2  
-13 1 -2 1.48 5.85 2  
-14 1 -2 52.22 12.60 2  
-15 1 -2 60.58 14.24 2  
-16 1 -2 26.21 10.84 2  
-16 0 2 -1.80 6.75 3  
-15 0 2 31.50 11.29 3  
-14 0 2 72.30 14.45 3  
-13 0 2 4.40 4.81 2  
-13 0 2 7.53 7.27 3  
-12 0 2 16.20 7.39 3  
-12 0 2 34.18 8.17 2  
-11 0 2 221.57 16.15 2  
-10 0 2 32.35 6.95 2  
-9 0 2 156.74 11.95 2  
8 0 -2 25.11 3.62 1  
-8 0 2 30.66 5.71 2  
-7 0 2 141.11 9.85 2  
7 0 -2 153.69 7.91 1  
6 0 -2 129.28 7.11 1  
-6 0 2 140.88 8.88 2  
-5 0 2 492.87 19.11 2  
-5 0 2 507.69 21.27 3  
5 0 -2 514.67 17.63 1  
4 0 -2 124.36 6.47 1  
-4 0 2 132.82 8.25 3  
-4 0 2 134.69 6.99 2  
-3 0 2 1801.75 55.41 3  
-3 0 2 1821.21 53.18 2  
-2 0 2 248.25 10.18 3  
2 0 -2 248.80 9.55 1  
1 0 -2 47.47 3.28 1  
-1 0 2 51.07 3.39 3  
0 0 -2 7.94 1.47 2  
-1 0 -2 4.63 1.37 1  
-1 0 -2 5.20 1.79 2  
-2 0 -2 1583.80 46.18 1  
-2 0 -2 1618.34 49.94 2  
-3 0 -2 1419.80 46.41 2

-3 0 -2 1422.86 41.30 1  
-4 0 -2 5.73 2.81 2  
-4 0 -2 8.61 1.88 1  
-5 0 -2 35.84 6.10 2  
-5 0 -2 41.68 3.58 1  
-6 0 -2 27.08 5.97 2  
-7 0 -2 87.24 10.25 2  
-8 0 -2 264.04 17.28 2  
-9 0 -2 3.19 3.28 2  
-10 0 -2 126.02 14.72 2  
-11 0 -2 5.10 4.21 2  
-12 0 -2 98.40 15.08 2  
-13 0 -2 2.97 4.99 2  
-14 0 -2 -4.01 5.30 2  
-15 0 -2 16.36 8.63 2  
-17 1 2 0.16 6.03 3  
-15 1 2 94.33 16.49 3  
-14 1 2 59.78 13.11 3  
-13 1 2 17.58 6.69 2  
-13 1 2 15.78 7.09 3  
-12 1 2 127.07 15.50 3  
-12 1 2 131.68 13.72 2  
-11 1 2 455.43 26.45 3  
-11 1 2 431.73 23.53 2  
-10 1 2 91.21 12.06 3  
-10 1 2 93.69 10.45 2  
-9 1 2 -0.51 3.21 3  
-9 1 2 3.91 3.25 2  
-8 1 2 1.83 3.07 3  
-8 1 2 2.63 2.79 2  
8 -1 -2 0.64 1.85 1  
-7 1 2 1.98 2.36 3  
-7 1 2 2.90 2.36 2  
7 -1 -2 3.84 1.78 1  
6 -1 -2 106.91 5.95 1  
-6 1 2 97.58 7.23 2  
-6 1 2 88.88 8.02 3  
-5 1 2 27.56 3.90 2  
-5 1 2 27.18 4.75 3  
5 -1 -2 19.87 2.79 1  
-4 1 2 2246.10 66.49 2  
4 -1 -2 2255.44 64.57 1  
-4 1 2 2206.92 68.52 3  
-3 1 2 1550.24 46.18 2  
-3 1 2 1554.28 48.18 3  
-2 1 2 8.21 2.25 3

|     |    |    |         |       |   |
|-----|----|----|---------|-------|---|
| 2   | -1 | -2 | 8.25    | 2.07  | 1 |
| 1   | -1 | -2 | 1174.26 | 34.94 | 1 |
| -1  | 1  | 2  | 1145.70 | 36.15 | 3 |
| 0   | -1 | -2 | 6.85    | 1.73  | 1 |
| -1  | -1 | -2 | 3356.03 | 94.95 | 1 |
| -2  | -1 | -2 | 899.94  | 28.07 | 1 |
| -2  | -1 | -2 | 897.54  | 30.85 | 2 |
| -3  | -1 | -2 | 258.96  | 10.70 | 1 |
| -3  | -1 | -2 | 282.51  | 13.83 | 2 |
| -4  | -1 | -2 | 37.29   | 6.13  | 2 |
| -4  | -1 | -2 | 38.17   | 3.90  | 1 |
| -5  | -1 | -2 | 236.34  | 14.38 | 2 |
| -5  | -1 | -2 | 255.52  | 10.73 | 1 |
| -6  | -1 | -2 | 22.48   | 5.79  | 2 |
| -6  | -1 | -2 | 25.78   | 3.68  | 1 |
| -7  | -1 | -2 | 28.85   | 7.04  | 2 |
| -8  | -1 | -2 | 616.05  | 30.13 | 2 |
| -9  | -1 | -2 | 61.70   | 10.63 | 2 |
| -10 | -1 | -2 | 16.08   | 6.37  | 2 |
| -11 | -1 | -2 | 74.56   | 13.07 | 2 |
| -12 | -1 | -2 | 62.39   | 12.17 | 2 |
| -13 | -1 | -2 | 5.94    | 5.03  | 2 |
| -14 | -1 | -2 | 89.43   | 16.98 | 2 |
| -15 | -1 | -2 | 23.92   | 10.33 | 2 |
| -17 | 2  | 2  | 0.47    | 6.82  | 3 |
| -16 | 2  | 2  | 5.89    | 7.07  | 3 |
| -15 | 2  | 2  | 160.39  | 20.52 | 3 |
| -14 | 2  | 2  | -0.77   | 5.34  | 3 |
| -13 | 2  | 2  | 429.74  | 28.28 | 3 |
| -13 | 2  | 2  | 479.48  | 27.01 | 2 |
| -12 | 2  | 2  | 85.90   | 13.43 | 3 |
| -12 | 2  | 2  | 97.91   | 12.44 | 2 |
| -11 | 2  | 2  | 215.90  | 16.20 | 2 |
| -11 | 2  | 2  | 201.69  | 17.09 | 3 |
| -10 | 2  | 2  | 1.46    | 3.78  | 2 |
| -10 | 2  | 2  | -0.07   | 3.95  | 3 |
| -9  | 2  | 2  | 25.29   | 5.93  | 2 |
| -9  | 2  | 2  | 19.35   | 6.09  | 3 |
| -8  | 2  | 2  | 1481.70 | 54.19 | 3 |
| -8  | 2  | 2  | 1573.97 | 52.89 | 2 |
| 8   | -2 | -2 | 1508.54 | 45.40 | 1 |
| -7  | 2  | 2  | 625.32  | 27.35 | 3 |
| 7   | -2 | -2 | 660.90  | 21.63 | 1 |
| -7  | 2  | 2  | 630.48  | 25.64 | 2 |
| -6  | 2  | 2  | 18.60   | 4.33  | 3 |
| 6   | -2 | -2 | 21.91   | 3.11  | 1 |

-6 2 2 16.89 3.58 2  
-5 2 2 2239.61 67.93 2  
5 -2 -2 2243.67 64.88 1  
-5 2 2 2207.71 69.75 3  
-4 2 2 411.18 15.72 2  
-4 2 2 408.28 16.99 3  
4 -2 -2 412.34 15.15 1  
-3 2 2 1012.13 31.69 2  
-3 2 2 996.58 32.94 3  
-2 2 2 -1.64 1.33 2  
-2 2 2 2.05 1.76 3  
2 -2 -2 -1.26 1.07 1  
1 -2 -2 135.03 7.10 1  
0 -2 -2 74.61 5.19 1  
-1 -2 -2 63.01 5.08 1  
-2 -2 -2 823.93 27.10 1  
-3 -2 -2 146.01 8.08 1  
-3 -2 -2 150.43 10.03 2  
-4 -2 -2 110.32 8.96 2  
-4 -2 -2 95.40 6.65 1  
-5 -2 -2 109.65 9.78 2  
-5 -2 -2 94.92 7.07 1  
-6 -2 -2 3.50 3.28 2  
-6 -2 -2 -1.23 2.28 1  
-7 -2 -2 162.71 13.71 2  
-8 -2 -2 187.59 15.23 2  
-9 -2 -2 3.76 3.79 2  
-10 -2 -2 46.30 10.14 2  
-11 -2 -2 158.23 17.87 2  
-12 -2 -2 60.65 13.54 2  
-13 -2 -2 2.53 5.78 2  
-14 -2 -2 5.76 6.17 2  
-15 -2 -2 108.00 19.64 2  
-17 3 2 0.15 6.55 3  
-16 3 2 1.98 7.62 3  
-15 3 2 21.73 9.61 3  
-14 3 2 131.20 17.78 3  
-13 3 2 253.59 20.95 3  
-13 3 2 238.04 18.11 2  
-12 3 2 23.84 8.82 3  
-12 3 2 17.93 5.82 2  
-11 3 2 10.82 6.23 3  
-11 3 2 4.29 4.46 2  
-10 3 2 33.58 7.70 3  
-10 3 2 34.82 7.02 2  
-9 3 2 41.07 8.08 3

|     |    |    |         |       |   |
|-----|----|----|---------|-------|---|
| -9  | 3  | 2  | 32.63   | 6.54  | 2 |
| -8  | 3  | 2  | 106.83  | 9.53  | 2 |
| 8   | -3 | -2 | 124.96  | 7.11  | 1 |
| -8  | 3  | 2  | 134.28  | 11.26 | 3 |
| -7  | 3  | 2  | 2288.71 | 73.64 | 2 |
| 7   | -3 | -2 | 2365.54 | 68.03 | 1 |
| -7  | 3  | 2  | 2317.78 | 75.49 | 3 |
| -6  | 3  | 2  | 2263.98 | 70.86 | 2 |
| 6   | -3 | -2 | 2282.71 | 66.30 | 1 |
| -6  | 3  | 2  | 2248.20 | 72.13 | 3 |
| 5   | -3 | -2 | 70.28   | 5.39  | 1 |
| -5  | 3  | 2  | 70.95   | 5.98  | 2 |
| -5  | 3  | 2  | 63.87   | 6.59  | 3 |
| -4  | 3  | 2  | 66.30   | 5.83  | 3 |
| -4  | 3  | 2  | 69.74   | 5.55  | 2 |
| -3  | 3  | 2  | 1165.06 | 37.45 | 2 |
| -3  | 3  | 2  | 1164.21 | 37.95 | 3 |
| 3   | -3 | -2 | 1191.51 | 36.94 | 1 |
| 2   | -3 | -2 | 28.75   | 3.77  | 1 |
| -2  | 3  | 2  | 31.90   | 4.05  | 3 |
| -2  | 3  | 2  | 24.56   | 3.50  | 2 |
| 1   | -3 | -2 | 276.99  | 12.15 | 1 |
| 0   | -3 | -2 | 1812.62 | 54.74 | 1 |
| -1  | -3 | -2 | 382.12  | 15.71 | 1 |
| -2  | -3 | -2 | 1.30    | 1.98  | 1 |
| -3  | -3 | -2 | 287.84  | 13.50 | 1 |
| -4  | -3 | -2 | 0.27    | 2.27  | 1 |
| -5  | -3 | -2 | 140.64  | 9.62  | 1 |
| -5  | -3 | -2 | 153.76  | 12.27 | 2 |
| -6  | -3 | -2 | 1121.15 | 38.12 | 1 |
| -6  | -3 | -2 | 1168.10 | 45.79 | 2 |
| -7  | -3 | -2 | 195.86  | 15.76 | 2 |
| -8  | -3 | -2 | 42.70   | 9.27  | 2 |
| -9  | -3 | -2 | -0.23   | 3.18  | 2 |
| -10 | -3 | -2 | 29.00   | 7.98  | 2 |
| -11 | -3 | -2 | 98.58   | 15.29 | 2 |
| -12 | -3 | -2 | 119.73  | 17.55 | 2 |
| -13 | -3 | -2 | 55.12   | 13.33 | 2 |
| -14 | -3 | -2 | 2.65    | 7.91  | 2 |
| -17 | 4  | 2  | 8.11    | 7.78  | 3 |
| -16 | 4  | 2  | 148.05  | 20.21 | 3 |
| -15 | 4  | 2  | 221.55  | 23.14 | 3 |
| -14 | 4  | 2  | -1.36   | 3.99  | 2 |
| -14 | 4  | 2  | -4.85   | 5.49  | 3 |
| -13 | 4  | 2  | 80.12   | 13.93 | 3 |
| -13 | 4  | 2  | 78.57   | 12.03 | 2 |

-12 4 2 10.42 6.35 3  
-12 4 2 23.08 6.73 2  
-11 4 2 105.94 11.99 2  
-11 4 2 88.23 12.80 3  
-10 4 2 456.93 24.88 3  
-10 4 2 446.00 23.64 2  
-9 4 2 184.14 13.29 2  
-9 4 2 147.27 12.80 3  
-8 4 2 329.01 18.03 2  
8 -4 -2 355.02 14.42 1  
-8 4 2 369.35 19.70 3  
-7 4 2 600.91 26.42 3  
7 -4 -2 637.01 22.34 1  
-7 4 2 641.47 26.07 2  
6 -4 -2 517.62 19.82 1  
-6 4 2 552.06 22.35 2  
-6 4 2 541.44 22.92 3  
-5 4 2 39.31 5.48 2  
-5 4 2 41.64 5.50 3  
5 -4 -2 50.94 5.04 1  
-4 4 2 594.52 22.71 3  
-4 4 2 601.34 22.61 2  
4 -4 -2 601.98 21.96 1  
3 -4 -2 1669.53 49.71 1  
-3 4 2 1623.56 50.99 2  
-3 4 2 1516.29 50.10 3  
-2 4 2 87.83 6.89 3  
2 -4 -2 89.61 6.63 1  
-2 4 2 101.12 7.26 2  
1 -4 -2 1890.56 57.80 1  
0 -4 -2 205.69 11.14 1  
-1 -4 -2 18.51 4.01 1  
-2 -4 -2 1130.65 38.10 1  
-3 -4 -2 309.55 15.06 1  
-4 -4 -2 28.58 5.14 1  
-5 -4 -2 217.61 12.86 1  
-5 -4 -2 224.49 15.80 2  
-6 -4 -2 655.70 32.11 2  
-6 -4 -2 706.04 27.36 1  
-7 -4 -2 89.20 12.48 2  
-8 -4 -2 74.13 12.25 2  
-9 -4 -2 5.58 4.50 2  
-10 -4 -2 55.68 11.94 2  
-11 -4 -2 2.42 5.65 2  
-12 -4 -2 0.07 6.20 2  
-13 -4 -2 96.85 16.43 2



|     |    |    |         |       |   |
|-----|----|----|---------|-------|---|
| -14 | -4 | -2 | -3.16   | 7.55  | 2 |
| -17 | 5  | 2  | 32.75   | 11.34 | 3 |
| -16 | 5  | 2  | 246.34  | 24.84 | 3 |
| -15 | 5  | 2  | 14.90   | 8.65  | 3 |
| -14 | 5  | 2  | 184.30  | 20.07 | 3 |
| -14 | 5  | 2  | 203.71  | 17.58 | 2 |
| -13 | 5  | 2  | 2.79    | 4.22  | 2 |
| -13 | 5  | 2  | 2.93    | 5.43  | 3 |
| -12 | 5  | 2  | 14.58   | 5.70  | 2 |
| -12 | 5  | 2  | 18.85   | 7.39  | 3 |
| -11 | 5  | 2  | 57.54   | 10.55 | 3 |
| -11 | 5  | 2  | 65.43   | 10.39 | 2 |
| -10 | 5  | 2  | 106.48  | 11.81 | 2 |
| -10 | 5  | 2  | 103.34  | 12.08 | 3 |
| -9  | 5  | 2  | 1566.59 | 57.00 | 3 |
| -9  | 5  | 2  | 1583.47 | 56.16 | 2 |
| -8  | 5  | 2  | 191.71  | 12.89 | 2 |
| -8  | 5  | 2  | 190.90  | 13.56 | 3 |
| 8   | -5 | -2 | 182.31  | 10.12 | 1 |
| -7  | 5  | 2  | 569.11  | 25.01 | 3 |
| 7   | -5 | -2 | 573.52  | 21.45 | 1 |
| -7  | 5  | 2  | 545.45  | 24.16 | 2 |
| -6  | 5  | 2  | 0.56    | 2.63  | 2 |
| 6   | -5 | -2 | 0.12    | 2.11  | 1 |
| -6  | 5  | 2  | -0.51   | 2.54  | 3 |
| -5  | 5  | 2  | 1003.05 | 36.09 | 2 |
| -5  | 5  | 2  | 1021.13 | 35.84 | 3 |
| 4   | -5 | -2 | 1018.10 | 33.47 | 1 |
| -4  | 5  | 2  | 945.29  | 33.88 | 3 |
| -4  | 5  | 2  | 976.85  | 34.65 | 2 |
| 3   | -5 | -2 | 1954.50 | 60.69 | 1 |
| -3  | 5  | 2  | 1991.73 | 62.77 | 2 |
| 2   | -5 | -2 | 744.25  | 27.28 | 1 |
| -2  | 5  | 2  | 768.41  | 28.55 | 2 |
| 1   | -5 | -2 | 559.75  | 22.44 | 1 |
| 0   | -5 | -2 | 469.20  | 20.01 | 1 |
| -1  | -5 | -2 | 374.96  | 17.44 | 1 |
| -2  | -5 | -2 | 47.00   | 6.31  | 1 |
| -3  | -5 | -2 | 32.31   | 5.88  | 1 |
| -4  | -5 | -2 | 326.69  | 16.77 | 1 |
| -5  | -5 | -2 | 151.62  | 11.20 | 1 |
| -6  | -5 | -2 | 2.68    | 3.60  | 1 |
| -6  | -5 | -2 | 1.98    | 2.99  | 2 |
| -7  | -5 | -2 | 21.45   | 6.58  | 2 |
| -8  | -5 | -2 | 62.76   | 11.95 | 2 |
| -9  | -5 | -2 | 284.42  | 22.33 | 2 |

-10 -5 -2 177.79 20.73 2  
-11 -5 -2 30.18 10.01 2  
-12 -5 -2 16.30 8.50 2  
-13 -5 -2 46.51 13.76 2  
-17 6 2 1.66 7.66 3  
-16 6 2 -5.29 6.28 3  
-15 6 2 301.84 25.01 3  
-14 6 2 119.43 15.61 2  
-14 6 2 122.69 16.86 3  
-13 6 2 289.99 20.88 2  
-13 6 2 290.30 22.34 3  
-12 6 2 172.83 17.21 3  
-12 6 2 186.03 15.81 2  
-11 6 2 221.77 17.48 3  
-11 6 2 224.25 16.92 2  
-10 6 2 167.30 14.08 3  
-10 6 2 133.68 12.25 2  
-9 6 2 784.58 33.73 3  
-9 6 2 766.20 33.09 2  
8 -6 -2 44.37 5.80 1  
-8 6 2 53.13 8.08 3  
-8 6 2 55.81 8.36 2  
-7 6 2 438.65 21.44 2  
7 -6 -2 447.40 18.55 1  
-7 6 2 428.12 20.87 3  
-6 6 2 817.70 31.10 3  
-6 6 2 870.15 32.32 2  
6 -6 -2 732.86 28.51 1  
5 -6 -2 893.31 31.86 1  
-5 6 2 912.79 33.94 2  
4 -6 -2 229.59 12.37 1  
-4 6 2 220.04 13.15 2  
3 -6 -2 349.53 15.93 1  
-3 6 2 325.80 16.50 2  
-3 6 2 313.33 15.36 3  
-2 6 2 2008.81 64.57 2  
2 -6 -2 1931.83 62.28 1  
1 -6 -2 30.18 5.67 1  
0 -6 -2 917.81 33.91 1  
-1 -6 -2 165.24 11.46 1  
-2 -6 -2 23.47 5.26 1  
-3 -6 -2 761.12 30.48 1  
-4 -6 -2 299.90 17.01 1  
-5 -6 -2 106.44 10.55 1  
-6 -6 -2 8.16 4.98 1  
-7 -6 -2 301.55 21.75 2

-8 -6 -2 -0.51 3.73 2  
-9 -6 -2 1.32 5.23 2  
-10 -6 -2 192.68 22.40 2  
-11 -6 -2 121.16 19.48 2  
-12 -6 -2 50.25 12.68 2  
-13 -6 -2 16.38 8.85 2  
-17 7 2 38.11 12.33 3  
-16 7 2 -2.13 6.31 3  
-15 7 2 25.73 10.26 3  
-14 7 2 16.75 8.07 3  
-14 7 2 22.83 8.45 2  
-13 7 2 0.51 4.11 2  
-13 7 2 2.51 5.59 3  
-12 7 2 136.85 15.48 3  
-12 7 2 118.66 13.90 2  
-11 7 2 239.74 17.61 2  
-11 7 2 269.88 19.36 3  
-10 7 2 6.56 5.15 2  
-10 7 2 11.74 5.00 3  
-9 7 2 24.15 6.36 3  
-9 7 2 13.01 5.24 2  
-8 7 2 61.78 8.67 3  
-8 7 2 46.36 8.15 2  
8 -7 -2 51.76 6.44 1  
7 -7 -2 2.94 3.33 1  
-7 7 2 4.75 3.48 2  
-7 7 2 6.02 3.69 3  
-5 7 2 67.64 7.32 3  
5 -7 -2 70.25 7.53 1  
-5 7 2 89.99 9.22 2  
-4 7 2 115.06 9.84 2  
4 -7 -2 97.56 8.26 1  
-4 7 2 116.64 9.01 3  
-3 7 2 12.71 4.67 2  
3 -7 -2 14.56 3.96 1  
2 -7 -2 603.86 25.71 1  
-2 7 2 646.83 27.37 2  
1 -7 -2 253.06 14.79 1  
0 -7 -2 6.11 3.63 1  
-1 -7 -2 2527.30 80.25 1  
-2 -7 -2 496.22 23.51 1  
-3 -7 -2 88.71 10.21 1  
-4 -7 -2 193.38 14.22 1  
-5 -7 -2 6.22 4.62 1  
-6 -7 -2 169.29 14.23 1  
-7 -7 -2 51.86 10.98 2

-8 -7 -2 -0.27 4.48 2  
-9 -7 -2 -5.80 4.84 2  
-10 -7 -2 109.75 18.22 2  
-11 -7 -2 4.45 7.48 2  
-12 -7 -2 19.69 11.84 2  
-17 8 2 9.03 9.30 3  
-16 8 2 -3.81 7.49 3  
-15 8 2 0.86 6.63 3  
-14 8 2 38.17 11.33 3  
-14 8 2 51.60 10.94 2  
-13 8 2 3.87 5.04 2  
-13 8 2 -3.07 6.00 3  
-12 8 2 2.17 3.90 2  
-12 8 2 9.60 7.34 3  
-11 8 2 122.62 13.95 2  
-11 8 2 99.97 12.84 3  
-10 8 2 3.54 4.16 2  
-10 8 2 0.52 3.32 3  
-9 8 2 61.74 9.35 3  
-9 8 2 45.07 8.86 2  
9 -8 -2 61.01 7.01 1  
-8 8 2 107.30 10.89 3  
8 -8 -2 150.37 10.31 1  
-8 8 2 153.76 13.01 2  
6 -8 -2 176.89 11.46 1  
-6 8 2 158.99 12.58 2  
-6 8 2 174.87 12.00 3  
5 -8 -2 1108.06 39.61 1  
-5 8 2 1153.30 40.06 3  
-5 8 2 1039.72 41.57 2  
-4 8 2 998.38 36.24 3  
4 -8 -2 957.22 35.94 1  
-4 8 2 983.57 38.54 2  
3 -8 -2 60.59 7.99 1  
-3 8 2 54.17 8.47 2  
2 -8 -2 141.17 11.11 1  
1 -8 -2 3.59 3.99 1  
0 -8 -2 96.49 10.55 1  
-1 -8 -2 282.78 17.35 1  
-2 -8 -2 52.86 9.02 1  
-3 -8 -2 187.53 14.45 1  
-4 -8 -2 39.84 8.54 1  
-5 -8 -2 71.34 10.54 1  
-6 -8 -2 128.18 13.50 1  
-7 -8 -2 6.83 6.10 2  
-8 -8 -2 239.66 21.86 2

-9 -8 -2 12.50 8.35 2  
-10 -8 -2 211.33 26.32 2  
-11 -8 -2 15.72 9.80 2  
-12 -8 -2 62.97 16.74 2  
-17 9 2 11.08 9.01 3  
-16 9 2 28.57 10.42 3  
-15 9 2 48.64 12.26 3  
-14 9 2 270.94 21.67 2  
-14 9 2 260.16 21.93 3  
-13 9 2 416.15 26.91 2  
-13 9 2 413.65 27.00 3  
-12 9 2 24.27 8.49 3  
-12 9 2 54.50 10.77 2  
-11 9 2 4.24 5.09 3  
-11 9 2 4.77 4.45 2  
-10 9 2 48.12 9.13 2  
-10 9 2 40.72 8.39 3  
-9 9 2 81.95 11.40 2  
9 -9 -2 101.13 9.45 1  
-8 9 2 11.68 4.57 3  
-8 9 2 30.07 7.49 2  
8 -9 -2 15.51 5.18 1  
7 -9 -2 4.75 3.64 1  
-7 9 2 -0.04 3.15 2  
-7 9 2 1.29 3.59 3  
6 -9 -2 120.23 10.39 1  
-6 9 2 155.17 11.69 3  
-6 9 2 154.09 13.27 2  
-5 9 2 8.95 4.93 3  
-5 9 2 3.94 3.80 2  
5 -9 -2 2.25 3.14 1  
4 -9 -2 50.75 8.08 1  
-4 9 2 39.66 7.90 2  
-3 9 2 5.35 4.40 2  
3 -9 -2 6.75 3.94 1  
2 -9 -2 32.71 6.69 1  
1 -9 -2 430.51 22.55 1  
0 -9 -2 106.05 11.79 1  
-1 -9 -2 105.64 11.91 1  
-2 -9 -2 156.14 13.60 1  
-3 -9 -2 19.32 6.74 1  
-4 -9 -2 40.74 8.84 1  
-5 -9 -2 3.00 5.17 1  
-6 -9 -2 85.48 12.17 1  
-8 -9 -2 93.54 16.65 2  
-9 -9 -2 58.22 14.22 2

|     |     |    |        |       |   |
|-----|-----|----|--------|-------|---|
| -10 | -9  | -2 | -8.96  | 6.53  | 2 |
| -11 | -9  | -2 | 83.33  | 18.73 | 2 |
| -16 | 10  | 2  | 0.39   | 8.91  | 3 |
| -15 | 10  | 2  | 0.35   | 7.65  | 3 |
| -14 | 10  | 2  | 0.73   | 6.35  | 2 |
| -14 | 10  | 2  | -7.09  | 5.95  | 3 |
| -13 | 10  | 2  | 16.75  | 8.15  | 3 |
| -13 | 10  | 2  | 14.25  | 6.90  | 2 |
| -12 | 10  | 2  | -2.22  | 5.67  | 3 |
| -12 | 10  | 2  | 2.32   | 4.20  | 2 |
| -11 | 10  | 2  | -1.52  | 4.19  | 2 |
| -11 | 10  | 2  | 0.63   | 4.35  | 3 |
| -10 | 10  | 2  | 20.79  | 6.70  | 2 |
| -10 | 10  | 2  | -2.55  | 2.97  | 3 |
| -9  | 10  | 2  | 12.79  | 5.40  | 3 |
| -9  | 10  | 2  | 6.01   | 4.72  | 2 |
| 9   | -10 | -2 | 2.98   | 4.05  | 1 |
| -8  | 10  | 2  | 30.92  | 7.56  | 2 |
| -8  | 10  | 2  | 36.54  | 7.54  | 3 |
| -7  | 10  | 2  | 170.91 | 14.66 | 2 |
| 7   | -10 | -2 | 178.87 | 12.93 | 1 |
| -7  | 10  | 2  | 166.89 | 13.26 | 3 |
| -6  | 10  | 2  | 171.13 | 14.65 | 2 |
| 6   | -10 | -2 | 182.67 | 13.14 | 1 |
| -6  | 10  | 2  | 169.09 | 12.92 | 3 |
| 5   | -10 | -2 | 155.19 | 12.16 | 1 |
| -5  | 10  | 2  | 138.52 | 14.09 | 2 |
| 4   | -10 | -2 | 5.20   | 3.94  | 1 |
| -4  | 10  | 2  | 11.28  | 5.29  | 2 |
| -3  | 10  | 2  | 11.09  | 5.29  | 2 |
| 3   | -10 | -2 | 16.03  | 5.55  | 1 |
| 2   | -10 | -2 | 23.01  | 6.36  | 1 |
| 1   | -10 | -2 | 96.22  | 11.77 | 1 |
| 0   | -10 | -2 | 131.57 | 13.82 | 1 |
| -1  | -10 | -2 | 5.87   | 4.54  | 1 |
| -2  | -10 | -2 | 209.75 | 16.53 | 1 |
| -3  | -10 | -2 | 15.97  | 6.85  | 1 |
| -4  | -10 | -2 | 12.47  | 6.01  | 1 |
| -5  | -10 | -2 | 97.79  | 13.54 | 1 |
| -6  | -10 | -2 | 139.70 | 15.78 | 1 |
| -8  | -10 | -2 | 74.58  | 16.10 | 2 |
| -9  | -10 | -2 | 10.50  | 9.39  | 2 |
| -10 | -10 | -2 | -0.56  | 8.91  | 2 |
| -15 | 11  | 2  | 205.55 | 21.72 | 2 |
| -14 | 11  | 2  | 108.16 | 16.64 | 2 |
| -13 | 11  | 2  | 3.46   | 4.87  | 2 |

|     |     |    |        |       |   |
|-----|-----|----|--------|-------|---|
| -12 | 11  | 2  | 64.34  | 12.09 | 2 |
| -11 | 11  | 2  | -0.30  | 4.72  | 2 |
| -10 | 11  | 2  | 28.80  | 8.18  | 2 |
| -9  | 11  | 2  | 5.25   | 4.34  | 2 |
| 9   | -11 | -2 | -1.61  | 4.01  | 1 |
| 8   | -11 | -2 | 117.59 | 11.72 | 1 |
| -8  | 11  | 2  | 115.75 | 13.88 | 2 |
| 7   | -11 | -2 | 18.70  | 5.78  | 1 |
| -7  | 11  | 2  | 15.08  | 5.67  | 2 |
| -6  | 11  | 2  | 7.87   | 5.52  | 2 |
| 6   | -11 | -2 | 10.87  | 4.23  | 1 |
| 5   | -11 | -2 | 44.71  | 8.22  | 1 |
| -5  | 11  | 2  | 41.74  | 8.84  | 2 |
| 4   | -11 | -2 | 61.58  | 9.64  | 1 |
| -4  | 11  | 2  | 81.92  | 12.56 | 2 |
| 3   | -11 | -2 | 292.29 | 19.45 | 1 |
| 2   | -11 | -2 | 83.34  | 11.78 | 1 |
| 1   | -11 | -2 | 93.31  | 12.41 | 1 |
| 0   | -11 | -2 | 25.96  | 7.75  | 1 |
| -1  | -11 | -2 | 62.57  | 10.95 | 1 |
| -2  | -11 | -2 | 61.31  | 11.20 | 1 |
| -3  | -11 | -2 | 26.08  | 8.06  | 1 |
| -4  | -11 | -2 | 3.58   | 5.41  | 1 |
| -5  | -11 | -2 | 81.11  | 13.56 | 1 |
| -6  | -11 | -2 | -5.04  | 5.83  | 1 |
| -8  | -11 | -2 | 7.41   | 10.02 | 2 |
| -9  | -11 | -2 | 179.15 | 28.14 | 2 |
| -10 | -11 | -2 | 30.66  | 14.32 | 2 |
| -15 | 12  | 2  | 17.15  | 8.77  | 2 |
| -14 | 12  | 2  | 2.55   | 6.09  | 2 |
| -13 | 12  | 2  | 3.64   | 6.22  | 2 |
| -12 | 12  | 2  | 33.04  | 9.83  | 2 |
| -11 | 12  | 2  | 257.72 | 20.97 | 2 |
| -10 | 12  | 2  | 22.13  | 7.75  | 2 |
| 9   | -12 | -2 | -2.02  | 3.79  | 1 |
| -9  | 12  | 2  | 7.40   | 5.50  | 2 |
| -8  | 12  | 2  | 16.34  | 6.33  | 2 |
| 8   | -12 | -2 | 16.99  | 6.43  | 1 |
| 7   | -12 | -2 | 5.52   | 4.86  | 1 |
| -7  | 12  | 2  | 4.21   | 4.55  | 2 |
| -6  | 12  | 2  | 181.39 | 16.16 | 2 |
| 6   | -12 | -2 | 192.94 | 15.78 | 1 |
| -5  | 12  | 2  | 21.21  | 7.76  | 2 |
| 5   | -12 | -2 | 14.16  | 6.82  | 1 |
| -4  | 12  | 2  | 98.10  | 14.21 | 2 |
| 4   | -12 | -2 | 116.74 | 13.66 | 1 |

|     |     |    |        |       |   |
|-----|-----|----|--------|-------|---|
| 3   | -12 | -2 | 26.56  | 7.60  | 1 |
| 2   | -12 | -2 | -0.23  | 5.61  | 1 |
| 1   | -12 | -2 | 27.46  | 8.56  | 1 |
| 0   | -12 | -2 | 18.41  | 6.82  | 1 |
| -1  | -12 | -2 | 168.33 | 17.01 | 1 |
| -2  | -12 | -2 | 39.52  | 9.62  | 1 |
| -3  | -12 | -2 | 75.55  | 13.00 | 1 |
| -4  | -12 | -2 | 179.31 | 18.86 | 1 |
| -5  | -12 | -2 | 3.16   | 6.77  | 1 |
| -6  | -12 | -2 | 23.74  | 9.86  | 1 |
| -8  | -12 | -2 | 89.87  | 21.25 | 2 |
| -9  | -12 | -2 | -6.76  | 12.93 | 2 |
| -15 | 13  | 2  | 35.93  | 11.60 | 2 |
| -14 | 13  | 2  | 71.72  | 14.14 | 2 |
| -13 | 13  | 2  | 93.90  | 15.95 | 2 |
| -12 | 13  | 2  | 12.69  | 7.99  | 2 |
| -11 | 13  | 2  | 84.70  | 14.21 | 2 |
| -10 | 13  | 2  | 21.42  | 7.60  | 2 |
| -9  | 13  | 2  | 4.96   | 5.19  | 2 |
| 9   | -13 | -2 | 5.56   | 5.81  | 1 |
| -8  | 13  | 2  | 197.96 | 17.89 | 2 |
| 8   | -13 | -2 | 167.72 | 14.99 | 1 |
| -7  | 13  | 2  | 145.13 | 16.80 | 2 |
| 7   | -13 | -2 | 187.17 | 16.16 | 1 |
| -6  | 13  | 2  | 0.65   | 4.61  | 2 |
| 6   | -13 | -2 | 6.30   | 6.27  | 1 |
| -5  | 13  | 2  | 246.15 | 19.85 | 2 |
| 5   | -13 | -2 | 251.00 | 18.80 | 1 |
| 4   | -13 | -2 | 14.49  | 6.83  | 1 |
| -4  | 13  | 2  | 16.31  | 7.05  | 2 |
| 3   | -13 | -2 | 28.13  | 9.10  | 1 |
| 2   | -13 | -2 | 29.90  | 9.42  | 1 |
| 1   | -13 | -2 | 10.97  | 7.20  | 1 |
| 0   | -13 | -2 | 13.73  | 7.40  | 1 |
| -1  | -13 | -2 | 2.04   | 5.67  | 1 |
| -2  | -13 | -2 | 26.66  | 8.68  | 1 |
| -3  | -13 | -2 | 16.62  | 8.81  | 1 |
| -4  | -13 | -2 | 1.60   | 7.22  | 1 |
| -5  | -13 | -2 | 17.21  | 8.84  | 1 |
| -6  | -13 | -2 | 33.80  | 10.96 | 1 |
| -8  | -13 | -2 | 44.78  | 19.32 | 2 |
| -15 | 14  | 2  | 3.04   | 7.37  | 2 |
| -14 | 14  | 2  | 50.98  | 12.73 | 2 |
| -13 | 14  | 2  | 322.80 | 25.72 | 2 |
| -12 | 14  | 2  | -5.80  | 5.79  | 2 |
| -11 | 14  | 2  | 5.90   | 7.21  | 2 |



|     |     |    |        |       |   |
|-----|-----|----|--------|-------|---|
| -10 | 14  | 2  | 112.44 | 16.56 | 2 |
| -9  | 14  | 2  | 71.98  | 13.69 | 2 |
| 9   | -14 | -2 | 60.40  | 11.36 | 1 |
| -8  | 14  | 2  | 5.33   | 5.16  | 2 |
| 8   | -14 | -2 | 3.99   | 6.42  | 1 |
| -7  | 14  | 2  | 6.94   | 6.17  | 2 |
| 7   | -14 | -2 | 8.59   | 6.71  | 1 |
| -6  | 14  | 2  | 102.82 | 15.76 | 2 |
| 6   | -14 | -2 | 88.27  | 13.34 | 1 |
| -5  | 14  | 2  | 26.82  | 9.33  | 2 |
| 5   | -14 | -2 | 31.72  | 10.15 | 1 |
| 4   | -14 | -2 | -0.56  | 5.54  | 1 |
| 3   | -14 | -2 | 6.10   | 6.58  | 1 |
| 2   | -14 | -2 | 17.99  | 8.93  | 1 |
| 1   | -14 | -2 | 325.48 | 23.66 | 1 |
| 0   | -14 | -2 | 40.35  | 10.82 | 1 |
| -1  | -14 | -2 | 54.35  | 12.65 | 1 |
| -2  | -14 | -2 | 95.50  | 15.80 | 1 |
| -3  | -14 | -2 | 1.95   | 7.49  | 1 |
| -4  | -14 | -2 | 31.93  | 11.03 | 1 |
| -5  | -14 | -2 | 1.06   | 7.03  | 1 |
| -6  | -14 | -2 | 5.91   | 8.21  | 1 |
| -15 | 15  | 2  | 7.44   | 9.44  | 2 |
| -14 | 15  | 2  | 27.74  | 11.30 | 2 |
| -13 | 15  | 2  | 0.46   | 7.04  | 2 |
| -12 | 15  | 2  | 157.28 | 20.25 | 2 |
| -11 | 15  | 2  | -1.60  | 5.51  | 2 |
| -10 | 15  | 2  | 48.17  | 11.93 | 2 |
| 9   | -15 | -2 | 6.43   | 7.50  | 1 |
| -9  | 15  | 2  | 6.21   | 6.40  | 2 |
| -8  | 15  | 2  | 12.72  | 7.50  | 2 |
| 8   | -15 | -2 | 29.54  | 9.32  | 1 |
| -7  | 15  | 2  | 382.83 | 27.93 | 2 |
| 7   | -15 | -2 | 443.18 | 27.02 | 1 |
| 6   | -15 | -2 | 168.75 | 18.17 | 1 |
| -6  | 15  | 2  | 136.36 | 18.54 | 2 |
| 5   | -15 | -2 | 54.52  | 12.14 | 1 |
| 4   | -15 | -2 | 2.23   | 5.84  | 1 |
| 3   | -15 | -2 | 8.56   | 7.62  | 1 |
| 2   | -15 | -2 | 89.68  | 16.02 | 1 |
| 1   | -15 | -2 | 88.95  | 15.04 | 1 |
| 0   | -15 | -2 | 75.55  | 14.16 | 1 |
| -1  | -15 | -2 | 31.64  | 11.35 | 1 |
| -2  | -15 | -2 | 0.01   | 7.10  | 1 |
| -3  | -15 | -2 | 12.75  | 8.19  | 1 |
| -4  | -15 | -2 | -2.90  | 7.71  | 1 |

|     |     |    |        |       |   |
|-----|-----|----|--------|-------|---|
| -5  | -15 | -2 | 28.46  | 11.72 | 1 |
| -6  | -15 | -2 | 74.03  | 15.92 | 1 |
| -14 | 16  | 2  | 15.21  | 9.59  | 2 |
| -13 | 16  | 2  | 43.10  | 12.61 | 2 |
| -12 | 16  | 2  | 19.18  | 9.41  | 2 |
| -11 | 16  | 2  | 47.67  | 12.11 | 2 |
| -10 | 16  | 2  | 1.59   | 6.04  | 2 |
| 9   | -16 | -2 | 122.30 | 16.19 | 1 |
| -9  | 16  | 2  | 99.23  | 16.92 | 2 |
| -8  | 16  | 2  | 45.57  | 12.18 | 2 |
| 8   | -16 | -2 | 41.54  | 11.04 | 1 |
| 7   | -16 | -2 | 1.21   | 8.01  | 1 |
| -7  | 16  | 2  | -8.89  | 5.86  | 2 |
| 6   | -16 | -2 | 45.15  | 12.28 | 1 |
| -6  | 16  | 2  | 47.37  | 12.34 | 2 |
| 5   | -16 | -2 | 77.83  | 14.60 | 1 |
| 4   | -16 | -2 | 72.39  | 14.49 | 1 |
| 3   | -16 | -2 | 123.34 | 17.87 | 1 |
| 2   | -16 | -2 | 1.43   | 8.25  | 1 |
| 1   | -16 | -2 | 4.79   | 6.60  | 1 |
| 0   | -16 | -2 | 119.03 | 17.76 | 1 |
| -1  | -16 | -2 | -0.55  | 7.41  | 1 |
| -2  | -16 | -2 | 32.80  | 10.57 | 1 |
| -3  | -16 | -2 | 13.20  | 9.97  | 1 |
| -4  | -16 | -2 | 65.88  | 15.34 | 1 |
| -5  | -16 | -2 | 5.31   | 10.26 | 1 |
| -13 | 17  | 2  | 7.22   | 8.67  | 2 |
| -12 | 17  | 2  | 18.04  | 11.12 | 2 |
| -11 | 17  | 2  | 4.62   | 7.98  | 2 |
| -10 | 17  | 2  | 14.64  | 9.16  | 2 |
| -9  | 17  | 2  | 107.57 | 18.42 | 2 |
| 9   | -17 | -2 | 98.85  | 16.17 | 1 |
| 8   | -17 | -2 | 7.19   | 8.87  | 1 |
| -8  | 17  | 2  | 3.83   | 7.11  | 2 |
| 7   | -17 | -2 | 63.32  | 14.34 | 1 |
| -7  | 17  | 2  | 34.85  | 11.11 | 2 |
| 6   | -17 | -2 | -5.97  | 7.43  | 1 |
| 5   | -17 | -2 | 17.71  | 10.26 | 1 |
| 4   | -17 | -2 | 26.53  | 11.79 | 1 |
| 3   | -17 | -2 | 13.39  | 9.97  | 1 |
| 2   | -17 | -2 | 79.05  | 15.56 | 1 |
| 1   | -17 | -2 | 5.19   | 8.26  | 1 |
| 0   | -17 | -2 | 141.79 | 19.56 | 1 |
| -1  | -17 | -2 | -2.37  | 8.64  | 1 |
| -2  | -17 | -2 | 3.28   | 10.14 | 1 |
| -3  | -17 | -2 | 154.69 | 22.30 | 1 |

|     |     |    |       |       |   |
|-----|-----|----|-------|-------|---|
| -12 | 18  | 2  | 9.37  | 9.72  | 2 |
| -11 | 18  | 2  | 38.68 | 12.57 | 2 |
| -10 | 18  | 2  | 7.13  | 8.55  | 2 |
| -9  | 18  | 2  | 5.81  | 8.72  | 2 |
| 9   | -18 | -2 | -0.91 | 8.77  | 1 |
| -8  | 18  | 2  | 21.04 | 11.38 | 2 |
| 8   | -18 | -2 | 14.92 | 10.31 | 1 |
| 7   | -18 | -2 | 2.33  | 8.98  | 1 |
| 6   | -18 | -2 | 75.48 | 15.80 | 1 |
| 5   | -18 | -2 | 19.97 | 10.63 | 1 |
| 4   | -18 | -2 | -2.69 | 8.46  | 1 |
| 3   | -18 | -2 | 60.74 | 14.95 | 1 |
| 2   | -18 | -2 | 26.14 | 10.91 | 1 |
| 1   | -18 | -2 | 15.79 | 9.83  | 1 |
| 0   | -18 | -2 | 13.40 | 11.03 | 1 |
| -1  | -18 | -2 | 23.61 | 11.93 | 1 |
| -10 | 19  | 2  | 19.73 | 11.82 | 2 |
| -9  | 19  | 2  | 9.74  | 10.44 | 2 |
| 9   | -19 | -2 | 10.93 | 10.58 | 1 |
| 8   | -19 | -2 | 3.08  | 9.67  | 1 |
| 7   | -19 | -2 | 1.34  | 9.21  | 1 |
| 6   | -19 | -2 | 1.75  | 8.95  | 1 |
| 5   | -19 | -2 | -1.54 | 7.97  | 1 |
| 4   | -19 | -2 | -3.38 | 7.93  | 1 |
| 3   | -19 | -2 | 8.11  | 8.56  | 1 |
| 2   | -19 | -2 | 2.42  | 8.08  | 1 |
| 1   | -20 | 3  | -6.55 | 6.65  | 1 |
| 2   | -20 | 3  | 3.80  | 7.31  | 1 |
| 3   | -20 | 3  | 7.74  | 7.77  | 1 |
| 4   | -20 | 3  | 16.73 | 10.04 | 1 |
| -5  | 20  | -3 | 2.71  | 6.49  | 2 |
| 5   | -20 | 3  | 9.60  | 9.79  | 1 |
| -6  | 20  | -3 | 2.15  | 6.88  | 2 |
| 6   | -20 | 3  | 77.81 | 15.04 | 1 |
| -7  | 20  | -3 | 6.47  | 9.85  | 2 |
| 7   | -20 | 3  | 15.96 | 10.98 | 1 |
| -8  | 20  | -3 | 5.96  | 9.55  | 2 |
| -2  | -19 | 3  | 98.73 | 18.76 | 1 |
| -1  | -19 | 3  | 15.73 | 12.29 | 1 |
| 0   | -19 | 3  | 12.13 | 8.44  | 1 |
| 1   | -19 | 3  | 4.02  | 8.51  | 1 |
| 2   | -19 | 3  | 4.90  | 8.29  | 1 |
| 3   | -19 | 3  | 13.19 | 9.75  | 1 |
| -4  | 19  | -3 | -3.89 | 6.58  | 2 |
| 4   | -19 | 3  | -0.37 | 8.10  | 1 |
| 5   | -19 | 3  | 12.48 | 8.97  | 1 |

|     |     |    |        |       |   |
|-----|-----|----|--------|-------|---|
| -5  | 19  | -3 | -2.51  | 6.46  | 2 |
| 6   | -19 | 3  | 22.94  | 11.02 | 1 |
| -6  | 19  | -3 | 12.30  | 9.11  | 2 |
| 7   | -19 | 3  | 3.19   | 9.44  | 1 |
| -7  | 19  | -3 | 13.87  | 9.82  | 2 |
| -8  | 19  | -3 | 17.30  | 9.31  | 2 |
| -9  | 19  | -3 | 9.18   | 9.63  | 2 |
| -10 | 19  | -3 | 107.30 | 20.21 | 2 |
| -4  | -18 | 3  | -1.77  | 11.42 | 1 |
| -3  | -18 | 3  | 14.93  | 10.84 | 1 |
| -3  | -18 | 3  | 5.72   | 9.21  | 4 |
| -2  | -18 | 3  | -1.97  | 9.10  | 1 |
| -2  | -18 | 3  | 4.89   | 7.10  | 4 |
| -1  | -18 | 3  | 16.64  | 8.70  | 4 |
| -1  | -18 | 3  | 14.67  | 9.87  | 1 |
| 0   | -18 | 3  | 64.38  | 14.40 | 4 |
| 1   | -18 | 3  | 15.05  | 9.55  | 1 |
| 1   | -18 | 3  | 16.60  | 9.35  | 4 |
| 2   | -18 | 3  | -7.62  | 7.41  | 4 |
| 2   | -18 | 3  | 9.87   | 8.87  | 1 |
| 3   | -18 | 3  | 25.70  | 10.32 | 1 |
| 4   | -18 | 3  | 121.47 | 17.72 | 1 |
| -4  | 18  | -3 | 140.99 | 20.78 | 2 |
| 5   | -18 | 3  | -5.02  | 8.30  | 1 |
| -5  | 18  | -3 | 4.95   | 8.13  | 2 |
| -6  | 18  | -3 | 25.15  | 10.91 | 2 |
| 6   | -18 | 3  | 50.00  | 12.64 | 1 |
| -7  | 18  | -3 | 73.66  | 15.24 | 2 |
| 7   | -18 | 3  | 60.24  | 13.44 | 1 |
| -8  | 18  | -3 | 0.15   | 6.42  | 2 |
| -9  | 18  | -3 | 102.61 | 18.74 | 2 |
| -10 | 18  | -3 | 2.85   | 7.90  | 2 |
| -11 | 18  | -3 | 67.34  | 16.87 | 2 |
| -12 | 18  | -3 | 8.17   | 9.91  | 2 |
| -6  | -17 | 3  | 21.26  | 14.11 | 1 |
| -5  | -17 | 3  | 90.32  | 17.81 | 1 |
| -5  | -17 | 3  | 75.39  | 15.35 | 4 |
| -4  | -17 | 3  | -8.75  | 8.96  | 1 |
| -4  | -17 | 3  | 17.94  | 10.08 | 4 |
| -3  | -17 | 3  | 19.54  | 11.52 | 1 |
| -3  | -17 | 3  | 15.01  | 8.64  | 4 |
| -2  | -17 | 3  | 127.58 | 17.70 | 4 |
| -2  | -17 | 3  | 141.35 | 19.74 | 1 |
| -1  | -17 | 3  | 15.10  | 8.83  | 1 |
| -1  | -17 | 3  | 23.60  | 8.19  | 4 |
| 0   | -17 | 3  | 79.32  | 15.19 | 4 |

|     |     |    |        |       |   |
|-----|-----|----|--------|-------|---|
| 0   | -17 | 3  | 66.34  | 14.09 | 1 |
| 1   | -17 | 3  | 6.84   | 9.92  | 1 |
| 1   | -17 | 3  | 1.13   | 8.14  | 4 |
| 2   | -17 | 3  | 108.30 | 16.82 | 4 |
| 2   | -17 | 3  | 90.22  | 15.04 | 1 |
| 3   | -17 | 3  | 20.09  | 9.02  | 4 |
| -3  | 17  | -3 | -1.40  | 7.05  | 2 |
| 3   | -17 | 3  | 3.25   | 8.25  | 1 |
| 4   | -17 | 3  | 8.36   | 7.81  | 4 |
| -4  | 17  | -3 | 9.32   | 8.54  | 2 |
| 4   | -17 | 3  | 7.02   | 8.32  | 1 |
| -5  | 17  | -3 | 112.83 | 18.46 | 2 |
| 5   | -17 | 3  | 118.43 | 16.67 | 1 |
| 6   | -17 | 3  | 50.81  | 12.71 | 1 |
| -6  | 17  | -3 | 62.78  | 13.88 | 2 |
| 7   | -17 | 3  | 218.38 | 20.37 | 1 |
| -7  | 17  | -3 | 196.14 | 22.99 | 2 |
| -8  | 17  | -3 | 96.63  | 17.40 | 2 |
| -9  | 17  | -3 | 8.06   | 8.32  | 2 |
| -10 | 17  | -3 | 28.51  | 10.38 | 2 |
| -11 | 17  | -3 | 141.87 | 21.70 | 2 |
| -12 | 17  | -3 | 3.56   | 9.27  | 2 |
| -13 | 17  | -3 | 96.96  | 19.70 | 2 |
| -7  | -16 | 3  | 18.82  | 12.98 | 1 |
| -6  | -16 | 3  | 46.22  | 12.81 | 4 |
| -6  | -16 | 3  | 53.50  | 15.77 | 1 |
| -5  | -16 | 3  | 6.48   | 9.61  | 1 |
| -5  | -16 | 3  | 11.21  | 8.29  | 4 |
| -4  | -16 | 3  | 194.71 | 22.82 | 1 |
| -4  | -16 | 3  | 200.58 | 22.03 | 4 |
| -3  | -16 | 3  | 89.09  | 15.95 | 1 |
| -3  | -16 | 3  | 79.37  | 13.57 | 4 |
| -2  | -16 | 3  | 14.49  | 8.13  | 1 |
| -2  | -16 | 3  | 4.79   | 5.98  | 4 |
| -1  | -16 | 3  | -4.08  | 4.95  | 4 |
| -1  | -16 | 3  | 14.12  | 7.77  | 1 |
| 0   | -16 | 3  | 10.24  | 8.19  | 1 |
| 0   | -16 | 3  | 8.00   | 7.57  | 4 |
| 1   | -16 | 3  | 403.69 | 26.88 | 1 |
| 1   | -16 | 3  | 405.10 | 26.91 | 4 |
| -2  | 16  | -3 | 423.26 | 29.70 | 2 |
| 2   | -16 | 3  | 445.03 | 27.61 | 4 |
| 2   | -16 | 3  | 419.94 | 27.19 | 1 |
| 3   | -16 | 3  | 14.68  | 8.46  | 1 |
| 3   | -16 | 3  | 13.02  | 8.34  | 4 |
| -3  | 16  | -3 | 8.75   | 7.87  | 2 |

|     |     |    |        |       |   |
|-----|-----|----|--------|-------|---|
| -4  | 16  | -3 | 26.44  | 10.28 | 2 |
| 4   | -16 | 3  | 27.82  | 9.17  | 4 |
| 4   | -16 | 3  | 32.19  | 9.39  | 1 |
| 5   | -16 | 3  | 109.54 | 15.18 | 4 |
| 5   | -16 | 3  | 117.67 | 15.74 | 1 |
| -5  | 16  | -3 | 80.36  | 15.44 | 2 |
| 6   | -16 | 3  | 26.96  | 8.53  | 1 |
| -6  | 16  | -3 | 22.76  | 9.69  | 2 |
| -7  | 16  | -3 | 576.08 | 35.02 | 2 |
| 7   | -16 | 3  | 518.46 | 29.80 | 1 |
| -8  | 16  | -3 | 29.92  | 9.85  | 2 |
| -9  | 16  | -3 | 143.84 | 19.76 | 2 |
| -10 | 16  | -3 | 12.59  | 8.91  | 2 |
| -11 | 16  | -3 | 38.65  | 11.95 | 2 |
| -12 | 16  | -3 | 14.28  | 9.31  | 2 |
| -13 | 16  | -3 | 14.44  | 9.59  | 2 |
| -7  | -15 | 3  | 22.39  | 11.31 | 4 |
| -7  | -15 | 3  | 54.94  | 16.03 | 1 |
| -6  | -15 | 3  | 19.11  | 9.36  | 4 |
| -6  | -15 | 3  | 22.45  | 11.48 | 1 |
| -5  | -15 | 3  | 2.22   | 5.90  | 4 |
| -5  | -15 | 3  | -8.58  | 6.33  | 1 |
| -4  | -15 | 3  | 28.30  | 8.63  | 4 |
| -4  | -15 | 3  | 12.27  | 8.16  | 1 |
| -3  | -15 | 3  | 1.33   | 6.86  | 1 |
| -3  | -15 | 3  | 4.65   | 5.24  | 4 |
| -2  | -15 | 3  | 102.12 | 15.28 | 1 |
| -2  | -15 | 3  | 118.29 | 15.18 | 4 |
| -1  | -15 | 3  | 22.15  | 7.15  | 4 |
| -1  | -15 | 3  | 4.09   | 6.65  | 1 |
| 0   | -15 | 3  | 23.38  | 7.91  | 1 |
| 0   | -15 | 3  | 3.92   | 5.87  | 4 |
| 1   | -15 | 3  | 49.63  | 10.54 | 1 |
| 1   | -15 | 3  | 67.83  | 12.21 | 4 |
| 2   | -15 | 3  | 11.09  | 6.87  | 4 |
| 2   | -15 | 3  | 14.19  | 7.63  | 1 |
| -2  | 15  | -3 | 15.94  | 7.83  | 2 |
| 3   | -15 | 3  | 161.67 | 17.06 | 4 |
| -3  | 15  | -3 | 209.36 | 21.05 | 2 |
| 3   | -15 | 3  | 192.19 | 17.06 | 1 |
| 4   | -15 | 3  | 3.40   | 6.31  | 1 |
| -4  | 15  | -3 | 3.27   | 5.85  | 2 |
| 4   | -15 | 3  | 9.54   | 6.74  | 4 |
| -5  | 15  | -3 | 256.04 | 21.52 | 2 |
| 5   | -15 | 3  | 231.59 | 18.96 | 1 |
| 5   | -15 | 3  | 242.77 | 19.23 | 4 |

|     |     |    |        |       |   |
|-----|-----|----|--------|-------|---|
| 6   | -15 | 3  | -2.57  | 5.99  | 4 |
| 6   | -15 | 3  | 3.60   | 6.57  | 1 |
| -6  | 15  | -3 | 0.31   | 6.18  | 2 |
| 7   | -15 | 3  | 17.37  | 7.87  | 1 |
| -7  | 15  | -3 | 8.96   | 6.91  | 2 |
| -8  | 15  | -3 | 299.58 | 24.38 | 2 |
| -9  | 15  | -3 | 3.17   | 6.15  | 2 |
| -10 | 15  | -3 | 34.97  | 11.09 | 2 |
| -11 | 15  | -3 | 2.95   | 6.17  | 2 |
| -12 | 15  | -3 | 18.24  | 9.93  | 2 |
| -13 | 15  | -3 | 11.92  | 8.91  | 2 |
| -14 | 15  | -3 | 50.64  | 14.32 | 2 |
| -8  | -14 | 3  | 4.65   | 10.36 | 1 |
| -8  | -14 | 3  | 4.46   | 9.46  | 4 |
| -7  | -14 | 3  | 10.85  | 9.58  | 1 |
| -7  | -14 | 3  | 3.32   | 7.29  | 4 |
| -6  | -14 | 3  | 114.97 | 17.85 | 1 |
| -6  | -14 | 3  | 120.14 | 16.82 | 4 |
| -5  | -14 | 3  | -0.89  | 6.56  | 1 |
| -5  | -14 | 3  | 3.58   | 5.01  | 4 |
| -4  | -14 | 3  | 4.29   | 5.68  | 4 |
| -4  | -14 | 3  | 1.23   | 6.87  | 1 |
| -3  | -14 | 3  | 34.55  | 10.20 | 1 |
| -3  | -14 | 3  | 35.66  | 8.63  | 4 |
| -2  | -14 | 3  | 63.47  | 12.16 | 1 |
| -2  | -14 | 3  | 74.19  | 11.57 | 4 |
| -1  | -14 | 3  | 277.39 | 19.64 | 4 |
| -1  | -14 | 3  | 263.40 | 20.27 | 1 |
| 0   | -14 | 3  | 79.25  | 12.38 | 4 |
| 0   | -14 | 3  | 53.39  | 11.04 | 1 |
| -1  | 14  | -3 | -3.70  | 4.96  | 2 |
| 1   | -14 | 3  | -4.75  | 4.92  | 1 |
| 1   | -14 | 3  | 3.44   | 5.24  | 4 |
| 2   | -14 | 3  | 14.51  | 7.07  | 1 |
| 2   | -14 | 3  | 8.56   | 6.05  | 4 |
| -2  | 14  | -3 | 2.83   | 5.83  | 2 |
| 3   | -14 | 3  | 1.53   | 5.18  | 4 |
| 3   | -14 | 3  | 0.29   | 5.28  | 1 |
| -3  | 14  | -3 | 6.67   | 5.86  | 2 |
| 4   | -14 | 3  | 23.11  | 7.65  | 4 |
| -4  | 14  | -3 | 25.01  | 8.34  | 2 |
| 4   | -14 | 3  | 31.72  | 8.87  | 1 |
| -5  | 14  | -3 | 4.69   | 6.22  | 2 |
| 5   | -14 | 3  | 3.82   | 6.05  | 1 |
| 5   | -14 | 3  | 14.05  | 6.57  | 4 |
| 6   | -14 | 3  | 159.76 | 15.72 | 1 |

-6 14 -3 187.38 19.50 2  
6 -14 3 162.01 15.47 4  
7 -14 3 4.07 6.02 1  
-7 14 -3 -3.58 4.15 2  
-8 14 -3 16.85 7.34 2  
-9 14 -3 0.77 5.57 2  
-10 14 -3 11.48 6.75 2  
-11 14 -3 122.56 18.68 2  
-12 14 -3 82.69 16.49 2  
-13 14 -3 38.51 12.00 2  
-14 14 -3 2.93 7.37 2  
-8 -13 3 55.37 14.10 1  
-8 -13 3 67.49 14.64 4  
-7 -13 3 196.37 20.55 4  
-7 -13 3 139.77 19.31 1  
-6 -13 3 6.82 7.52 1  
-6 -13 3 6.49 5.66 4  
-5 -13 3 35.16 9.32 4  
-5 -13 3 25.13 9.21 1  
-4 -13 3 -3.06 5.72 1  
-4 -13 3 -0.63 4.34 4  
-3 -13 3 5.35 5.14 1  
-3 -13 3 1.25 4.83 4  
-2 -13 3 3.65 5.04 1  
-2 -13 3 1.79 3.99 4  
-1 -13 3 5.89 4.91 1  
-1 -13 3 17.19 5.98 4  
0 -13 3 7.22 5.43 1  
0 -13 3 12.86 6.07 4  
1 -13 3 85.18 12.24 1  
-1 13 -3 111.71 14.93 2  
1 -13 3 83.21 12.19 4  
-2 13 -3 6.75 6.21 2  
2 -13 3 1.04 4.97 4  
2 -13 3 2.89 4.83 1  
3 -13 3 248.11 17.25 4  
-3 13 -3 228.64 18.90 2  
3 -13 3 218.23 17.11 1  
4 -13 3 3.41 4.10 1  
-4 13 -3 -3.28 4.78 2  
4 -13 3 0.62 4.64 4  
5 -13 3 50.44 9.16 1  
-5 13 -3 60.51 11.79 2  
5 -13 3 54.21 9.50 4  
-6 13 -3 598.37 32.99 2  
6 -13 3 623.87 29.65 1



|     |     |    |        |       |   |
|-----|-----|----|--------|-------|---|
| 6   | -13 | 3  | 663.13 | 30.27 | 4 |
| -7  | 13  | -3 | 8.92   | 5.80  | 2 |
| 7   | -13 | 3  | -4.84  | 2.78  | 1 |
| -8  | 13  | -3 | 119.80 | 16.07 | 2 |
| -9  | 13  | -3 | 54.62  | 12.07 | 2 |
| -10 | 13  | -3 | 7.92   | 6.48  | 2 |
| -11 | 13  | -3 | 0.76   | 5.97  | 2 |
| -12 | 13  | -3 | -3.56  | 5.58  | 2 |
| -13 | 13  | -3 | 152.33 | 21.50 | 2 |
| -14 | 13  | -3 | -2.97  | 6.11  | 2 |
| -15 | 13  | -3 | 37.68  | 12.94 | 2 |
| -8  | -12 | 3  | -8.23  | 7.34  | 1 |
| -8  | -12 | 3  | 5.43   | 5.99  | 4 |
| -7  | -12 | 3  | -2.05  | 6.25  | 1 |
| -7  | -12 | 3  | 3.27   | 5.47  | 4 |
| -6  | -12 | 3  | 7.76   | 7.98  | 1 |
| -6  | -12 | 3  | 32.75  | 8.44  | 4 |
| -5  | -12 | 3  | 14.30  | 6.40  | 1 |
| -5  | -12 | 3  | -3.50  | 4.42  | 4 |
| -4  | -12 | 3  | 288.25 | 19.77 | 4 |
| -4  | -12 | 3  | 315.48 | 21.26 | 1 |
| 0   | 12  | -3 | 119.56 | 14.51 | 2 |
| -1  | 12  | -3 | 8.85   | 5.96  | 2 |
| 2   | -12 | 3  | 126.48 | 12.93 | 4 |
| 2   | -12 | 3  | 137.04 | 13.21 | 1 |
| -2  | 12  | -3 | 127.21 | 14.45 | 2 |
| -3  | 12  | -3 | 1.56   | 5.18  | 2 |
| 3   | -12 | 3  | 0.71   | 3.25  | 1 |
| 3   | -12 | 3  | -0.36  | 3.71  | 4 |
| 4   | -12 | 3  | 168.50 | 13.37 | 4 |
| 4   | -12 | 3  | 179.76 | 13.58 | 1 |
| -4  | 12  | -3 | 198.05 | 16.69 | 2 |
| 5   | -12 | 3  | 33.40  | 7.54  | 1 |
| 5   | -12 | 3  | 46.34  | 8.46  | 4 |
| -5  | 12  | -3 | 29.54  | 8.14  | 2 |
| 6   | -12 | 3  | 79.21  | 10.05 | 1 |
| -6  | 12  | -3 | 83.97  | 12.86 | 2 |
| 6   | -12 | 3  | 89.94  | 10.52 | 4 |
| -7  | 12  | -3 | 169.45 | 17.51 | 2 |
| 7   | -12 | 3  | 166.26 | 12.97 | 1 |
| 7   | -12 | 3  | 170.08 | 13.26 | 4 |
| -8  | 12  | -3 | 58.21  | 11.31 | 2 |
| -9  | 12  | -3 | 284.50 | 22.27 | 2 |
| -10 | 12  | -3 | 334.33 | 25.23 | 2 |
| -11 | 12  | -3 | 1.88   | 5.28  | 2 |
| -12 | 12  | -3 | 28.43  | 10.03 | 2 |

|     |     |    |        |       |   |
|-----|-----|----|--------|-------|---|
| -13 | 12  | -3 | 64.12  | 13.83 | 2 |
| -14 | 12  | -3 | 25.14  | 10.03 | 2 |
| -15 | 12  | -3 | 12.55  | 10.32 | 2 |
| -8  | -11 | 3  | -3.90  | 6.57  | 1 |
| -8  | -11 | 3  | 0.19   | 5.63  | 4 |
| -7  | -11 | 3  | 9.14   | 5.57  | 4 |
| -7  | -11 | 3  | 4.11   | 6.18  | 1 |
| -6  | -11 | 3  | 126.89 | 14.81 | 4 |
| -6  | -11 | 3  | 82.09  | 12.92 | 1 |
| 4   | 11  | -3 | 12.70  | 6.52  | 1 |
| 3   | 11  | -3 | 61.89  | 10.75 | 1 |
| 2   | 11  | -3 | 27.05  | 7.55  | 1 |
| 1   | 11  | -3 | 203.26 | 15.60 | 1 |
| 0   | 11  | -3 | 25.93  | 6.71  | 1 |
| 0   | 11  | -3 | 27.88  | 7.16  | 2 |
| -1  | 11  | -3 | 138.79 | 12.16 | 1 |
| -1  | 11  | -3 | 120.06 | 13.75 | 2 |
| -2  | 11  | -3 | -2.50  | 2.69  | 1 |
| -2  | 11  | -3 | 3.35   | 4.01  | 2 |
| -3  | 11  | -3 | 3.00   | 3.41  | 2 |
| 4   | -11 | 3  | 105.54 | 10.68 | 1 |
| -4  | 11  | -3 | 85.45  | 11.75 | 2 |
| 4   | -11 | 3  | 109.20 | 11.01 | 4 |
| 5   | -11 | 3  | 72.82  | 9.10  | 4 |
| -5  | 11  | -3 | 72.19  | 11.13 | 2 |
| 5   | -11 | 3  | 71.99  | 9.15  | 1 |
| 6   | -11 | 3  | -0.83  | 2.54  | 1 |
| 6   | -11 | 3  | 0.35   | 2.87  | 4 |
| -6  | 11  | -3 | -2.80  | 3.56  | 2 |
| 7   | -11 | 3  | 69.58  | 8.85  | 4 |
| 7   | -11 | 3  | 77.86  | 9.14  | 1 |
| -7  | 11  | -3 | 65.22  | 11.51 | 2 |
| -8  | 11  | -3 | 118.13 | 15.42 | 2 |
| -9  | 11  | -3 | 101.45 | 15.16 | 2 |
| -10 | 11  | -3 | 12.96  | 7.04  | 2 |
| -11 | 11  | -3 | 212.91 | 21.76 | 2 |
| -12 | 11  | -3 | 0.85   | 5.03  | 2 |
| -13 | 11  | -3 | 41.15  | 11.09 | 2 |
| -14 | 11  | -3 | 17.58  | 8.40  | 2 |
| -15 | 11  | -3 | 57.35  | 14.45 | 2 |
| -10 | -10 | 3  | 82.68  | 17.66 | 2 |
| -8  | -10 | 3  | 11.20  | 7.09  | 1 |
| -8  | -10 | 3  | 4.73   | 5.48  | 4 |
| 6   | 10  | -3 | 10.66  | 6.27  | 1 |
| 5   | 10  | -3 | 9.59   | 5.83  | 1 |
| 4   | 10  | -3 | 681.93 | 32.05 | 1 |

|     |     |    |        |       |   |
|-----|-----|----|--------|-------|---|
| 3   | 10  | -3 | 12.96  | 5.61  | 1 |
| 2   | 10  | -3 | 161.33 | 13.53 | 1 |
| 1   | 10  | -3 | 103.66 | 11.66 | 1 |
| 0   | 10  | -3 | 29.25  | 6.76  | 2 |
| 0   | 10  | -3 | 25.03  | 5.78  | 1 |
| -1  | 10  | -3 | 16.53  | 5.32  | 2 |
| -1  | 10  | -3 | 11.23  | 4.02  | 1 |
| -2  | 10  | -3 | 3.15   | 3.58  | 1 |
| -2  | 10  | -3 | 2.62   | 3.39  | 2 |
| -3  | 10  | -3 | 242.42 | 15.15 | 1 |
| -3  | 10  | -3 | 245.52 | 16.72 | 2 |
| -4  | 10  | -3 | 35.31  | 7.56  | 2 |
| 5   | -10 | 3  | 128.20 | 10.40 | 4 |
| -5  | 10  | -3 | 108.60 | 12.72 | 2 |
| 5   | -10 | 3  | 118.49 | 9.80  | 1 |
| -6  | 10  | -3 | 413.14 | 23.52 | 2 |
| 6   | -10 | 3  | 350.45 | 17.70 | 4 |
| 6   | -10 | 3  | 346.55 | 17.68 | 1 |
| 7   | -10 | 3  | 187.87 | 12.08 | 1 |
| 7   | -10 | 3  | 162.24 | 11.69 | 4 |
| -7  | 10  | -3 | 181.91 | 16.02 | 2 |
| -8  | 10  | -3 | 283.67 | 20.86 | 2 |
| -9  | 10  | -3 | 166.94 | 17.74 | 2 |
| -10 | 10  | -3 | -0.26  | 4.66  | 2 |
| -11 | 10  | -3 | 84.51  | 14.06 | 2 |
| -12 | 10  | -3 | 7.85   | 5.77  | 2 |
| -13 | 10  | -3 | 6.34   | 6.02  | 2 |
| -14 | 10  | -3 | 6.58   | 6.08  | 2 |
| -15 | 10  | -3 | 17.50  | 8.83  | 2 |
| -16 | 10  | -3 | 20.20  | 10.66 | 2 |
| -13 | -9  | 3  | 86.44  | 19.45 | 3 |
| -10 | -9  | 3  | 45.78  | 12.34 | 2 |
| -9  | -9  | 3  | 113.14 | 17.76 | 2 |
| 7   | 9   | -3 | 52.70  | 9.83  | 1 |
| 6   | 9   | -3 | 341.45 | 20.91 | 1 |
| 5   | 9   | -3 | 4.29   | 4.22  | 1 |
| 4   | 9   | -3 | 151.75 | 13.35 | 1 |
| 3   | 9   | -3 | 274.53 | 17.46 | 1 |
| 2   | 9   | -3 | 11.94  | 4.67  | 1 |
| 1   | 9   | -3 | 558.47 | 26.29 | 2 |
| 1   | 9   | -3 | 558.20 | 25.70 | 1 |
| 0   | 9   | -3 | 237.96 | 15.05 | 1 |
| 0   | 9   | -3 | 260.92 | 16.24 | 2 |
| -1  | 9   | -3 | -0.30  | 2.24  | 2 |
| -1  | 9   | -3 | 1.48   | 2.76  | 1 |
| -2  | 9   | -3 | 165.59 | 12.40 | 2 |

|     |    |    |        |       |   |
|-----|----|----|--------|-------|---|
| -2  | 9  | -3 | 146.84 | 11.15 | 1 |
| -3  | 9  | -3 | 118.76 | 9.69  | 1 |
| -3  | 9  | -3 | 117.75 | 10.64 | 2 |
| -4  | 9  | -3 | 0.29   | 1.98  | 1 |
| -4  | 9  | -3 | 0.71   | 2.71  | 2 |
| -5  | 9  | -3 | 95.32  | 11.63 | 2 |
| -5  | 9  | -3 | 82.55  | 6.49  | 3 |
| 6   | -9 | 3  | -0.70  | 2.74  | 4 |
| -6  | 9  | -3 | 0.32   | 2.79  | 3 |
| -6  | 9  | -3 | 4.24   | 3.98  | 2 |
| 6   | -9 | 3  | 3.44   | 3.20  | 1 |
| -7  | 9  | -3 | 908.41 | 33.47 | 3 |
| 7   | -9 | 3  | 865.13 | 31.61 | 1 |
| -7  | 9  | -3 | 937.41 | 40.13 | 2 |
| 7   | -9 | 3  | 818.28 | 31.20 | 4 |
| -8  | 9  | -3 | 66.15  | 11.56 | 2 |
| -8  | 9  | -3 | 67.94  | 8.49  | 3 |
| -9  | 9  | -3 | 43.64  | 7.94  | 3 |
| -9  | 9  | -3 | 32.91  | 8.39  | 2 |
| -10 | 9  | -3 | 42.51  | 8.51  | 3 |
| -10 | 9  | -3 | 45.52  | 10.36 | 2 |
| -11 | 9  | -3 | 1.50   | 4.55  | 2 |
| -11 | 9  | -3 | 9.80   | 5.28  | 3 |
| -12 | 9  | -3 | 4.80   | 6.56  | 3 |
| -12 | 9  | -3 | -2.13  | 4.75  | 2 |
| -13 | 9  | -3 | 74.23  | 13.48 | 3 |
| -13 | 9  | -3 | 64.01  | 13.60 | 2 |
| -14 | 9  | -3 | 18.44  | 7.95  | 2 |
| -15 | 9  | -3 | 4.27   | 7.16  | 2 |
| -16 | 9  | -3 | 0.92   | 7.40  | 2 |
| -14 | -8 | 3  | 0.46   | 12.19 | 3 |
| -10 | -8 | 3  | 22.13  | 7.83  | 2 |
| -9  | -8 | 3  | 16.18  | 6.67  | 2 |
| 8   | 8  | -3 | 22.67  | 7.24  | 1 |
| 7   | 8  | -3 | -0.66  | 4.53  | 1 |
| 6   | 8  | -3 | 62.23  | 9.82  | 1 |
| 5   | 8  | -3 | 6.88   | 4.15  | 1 |
| 4   | 8  | -3 | 77.06  | 9.68  | 1 |
| 3   | 8  | -3 | 49.04  | 8.03  | 1 |
| 2   | 8  | -3 | 374.15 | 19.35 | 1 |
| 1   | 8  | -3 | 273.37 | 16.00 | 1 |
| 1   | 8  | -3 | 303.70 | 16.81 | 2 |
| 0   | 8  | -3 | 324.70 | 17.46 | 2 |
| 0   | 8  | -3 | 340.37 | 17.41 | 1 |
| -1  | 8  | -3 | 150.74 | 11.25 | 2 |
| -1  | 8  | -3 | 165.93 | 11.06 | 1 |

|     |    |    |         |       |   |
|-----|----|----|---------|-------|---|
| -2  | 8  | -3 | 48.99   | 7.25  | 2 |
| -2  | 8  | -3 | 44.87   | 6.42  | 1 |
| -3  | 8  | -3 | 54.58   | 6.61  | 1 |
| -3  | 8  | -3 | 61.16   | 8.51  | 2 |
| -4  | 8  | -3 | 52.65   | 8.17  | 2 |
| -4  | 8  | -3 | 45.96   | 4.19  | 3 |
| -4  | 8  | -3 | 56.35   | 6.54  | 1 |
| -5  | 8  | -3 | 7.37    | 4.28  | 2 |
| -5  | 8  | -3 | 2.61    | 1.93  | 3 |
| -5  | 8  | -3 | 2.77    | 2.37  | 1 |
| -6  | 8  | -3 | 608.62  | 24.44 | 3 |
| 6   | -8 | 3  | 631.92  | 23.74 | 1 |
| 6   | -8 | 3  | 631.21  | 23.65 | 4 |
| -6  | 8  | -3 | 633.50  | 30.08 | 2 |
| -7  | 8  | -3 | 22.40   | 5.31  | 3 |
| 7   | -8 | 3  | 24.21   | 4.50  | 1 |
| 7   | -8 | 3  | 18.81   | 4.40  | 4 |
| -7  | 8  | -3 | 16.54   | 6.27  | 2 |
| -8  | 8  | -3 | 12.72   | 4.66  | 3 |
| -8  | 8  | -3 | 19.07   | 6.17  | 2 |
| -9  | 8  | -3 | 30.00   | 8.35  | 2 |
| -10 | 8  | -3 | 1.43    | 4.65  | 2 |
| -10 | 8  | -3 | 6.05    | 4.35  | 3 |
| -11 | 8  | -3 | 12.09   | 6.51  | 3 |
| -11 | 8  | -3 | 7.78    | 5.65  | 2 |
| -12 | 8  | -3 | -2.51   | 4.61  | 3 |
| -12 | 8  | -3 | 0.14    | 4.22  | 2 |
| -13 | 8  | -3 | -1.52   | 4.94  | 2 |
| -13 | 8  | -3 | 6.69    | 6.59  | 3 |
| -14 | 8  | -3 | 33.48   | 10.76 | 3 |
| -14 | 8  | -3 | 24.15   | 9.21  | 2 |
| -15 | 8  | -3 | 1.01    | 7.03  | 3 |
| -15 | 8  | -3 | 9.49    | 7.75  | 2 |
| -16 | 8  | -3 | 56.67   | 14.26 | 3 |
| -16 | 8  | -3 | 26.80   | 11.23 | 2 |
| -14 | -7 | 3  | 15.51   | 11.35 | 3 |
| -10 | -7 | 3  | 60.23   | 12.48 | 2 |
| -9  | -7 | 3  | 20.86   | 6.67  | 2 |
| 8   | 7  | -3 | 12.32   | 5.01  | 1 |
| 7   | 7  | -3 | 57.17   | 9.02  | 1 |
| 6   | 7  | -3 | -0.54   | 3.38  | 1 |
| 5   | 7  | -3 | 43.69   | 7.67  | 1 |
| 4   | 7  | -3 | 152.24  | 11.77 | 1 |
| 3   | 7  | -3 | 1537.58 | 52.46 | 1 |
| 2   | 7  | -3 | 432.27  | 20.30 | 1 |
| 1   | 7  | -3 | 727.93  | 27.86 | 1 |

|     |    |    |         |       |   |
|-----|----|----|---------|-------|---|
| 1   | 7  | -3 | 662.03  | 27.58 | 2 |
| 0   | 7  | -3 | 478.19  | 21.59 | 2 |
| 0   | 7  | -3 | 514.16  | 21.49 | 1 |
| -1  | 7  | -3 | 254.21  | 14.17 | 2 |
| -1  | 7  | -3 | 232.35  | 13.11 | 1 |
| -2  | 7  | -3 | 1093.23 | 37.35 | 1 |
| -2  | 7  | -3 | 1085.10 | 39.48 | 2 |
| -3  | 7  | -3 | 2.33    | 2.18  | 1 |
| -3  | 7  | -3 | 4.64    | 1.73  | 3 |
| -3  | 7  | -3 | 5.68    | 3.08  | 2 |
| -4  | 7  | -3 | 252.36  | 12.33 | 1 |
| -4  | 7  | -3 | 212.53  | 14.20 | 2 |
| -4  | 7  | -3 | 228.45  | 10.50 | 3 |
| -5  | 7  | -3 | 4.58    | 2.54  | 1 |
| -5  | 7  | -3 | 0.39    | 2.97  | 2 |
| 6   | -7 | 3  | 3.09    | 1.98  | 1 |
| 6   | -7 | 3  | 1.76    | 2.29  | 4 |
| -6  | 7  | -3 | -0.18   | 2.86  | 2 |
| -7  | 7  | -3 | 106.10  | 12.72 | 2 |
| -8  | 7  | -3 | 1.12    | 3.22  | 2 |
| -9  | 7  | -3 | 374.05  | 23.76 | 2 |
| -10 | 7  | -3 | 490.20  | 29.03 | 2 |
| -11 | 7  | -3 | 2.27    | 3.54  | 2 |
| -12 | 7  | -3 | 53.27   | 11.38 | 2 |
| -13 | 7  | -3 | 69.70   | 13.24 | 2 |
| -14 | 7  | -3 | 0.18    | 6.49  | 3 |
| -14 | 7  | -3 | 9.21    | 6.40  | 2 |
| -15 | 7  | -3 | 20.80   | 9.05  | 3 |
| -15 | 7  | -3 | 7.49    | 6.79  | 2 |
| -16 | 7  | -3 | 15.06   | 9.42  | 2 |
| -16 | 7  | -3 | 19.29   | 9.65  | 3 |
| -15 | -6 | 3  | 62.65   | 17.43 | 3 |
| -14 | -6 | 3  | 119.37  | 20.50 | 3 |
| -11 | -6 | 3  | 45.20   | 10.46 | 2 |
| -10 | -6 | 3  | -3.93   | 3.83  | 2 |
| -9  | -6 | 3  | 674.20  | 33.26 | 2 |
| -8  | -6 | 3  | 1.51    | 4.18  | 2 |
| 8   | 6  | -3 | 6.97    | 4.35  | 1 |
| 7   | 6  | -3 | 541.80  | 24.84 | 1 |
| 6   | 6  | -3 | 82.98   | 9.29  | 1 |
| 5   | 6  | -3 | 167.24  | 11.88 | 1 |
| 4   | 6  | -3 | 25.76   | 5.25  | 1 |
| 3   | 6  | -3 | 986.03  | 36.09 | 1 |
| 2   | 6  | -3 | 2057.03 | 65.23 | 1 |
| 1   | 6  | -3 | 176.46  | 11.01 | 1 |
| 1   | 6  | -3 | 195.82  | 11.20 | 2 |

|     |    |    |         |       |   |
|-----|----|----|---------|-------|---|
| -1  | -6 | 3  | 161.81  | 7.65  | 3 |
| 0   | 6  | -3 | 51.17   | 5.99  | 1 |
| 0   | 6  | -3 | 55.85   | 6.41  | 2 |
| -1  | 6  | -3 | 54.15   | 5.95  | 1 |
| -1  | 6  | -3 | 46.01   | 6.00  | 2 |
| -2  | 6  | -3 | 43.94   | 6.15  | 2 |
| -2  | 6  | -3 | 57.40   | 5.86  | 1 |
| -3  | 6  | -3 | 103.37  | 8.65  | 2 |
| -3  | 6  | -3 | 101.56  | 7.02  | 1 |
| -4  | 6  | -3 | 510.45  | 23.84 | 2 |
| -4  | 6  | -3 | 558.09  | 20.26 | 1 |
| -5  | 6  | -3 | 99.66   | 6.84  | 1 |
| -5  | 6  | -3 | 95.69   | 10.49 | 2 |
| -6  | 6  | -3 | 92.28   | 10.86 | 2 |
| -7  | 6  | -3 | 425.70  | 23.53 | 2 |
| -8  | 6  | -3 | 181.91  | 15.03 | 2 |
| -9  | 6  | -3 | 21.45   | 6.27  | 2 |
| -10 | 6  | -3 | 244.93  | 19.09 | 2 |
| -11 | 6  | -3 | 125.85  | 15.74 | 2 |
| -12 | 6  | -3 | 105.09  | 15.44 | 2 |
| -13 | 6  | -3 | 7.55    | 5.71  | 2 |
| -14 | 6  | -3 | 80.81   | 15.10 | 2 |
| -15 | 6  | -3 | 13.80   | 7.71  | 2 |
| -15 | 6  | -3 | 25.78   | 10.35 | 3 |
| -16 | 6  | -3 | 48.41   | 12.77 | 2 |
| -16 | 6  | -3 | 42.77   | 13.06 | 3 |
| -15 | -5 | 3  | 56.89   | 15.16 | 3 |
| -14 | -5 | 3  | 11.42   | 9.08  | 3 |
| -13 | -5 | 3  | 52.55   | 12.67 | 3 |
| -11 | -5 | 3  | 615.73  | 32.21 | 2 |
| -10 | -5 | 3  | 26.33   | 7.24  | 2 |
| -9  | -5 | 3  | 129.30  | 13.97 | 2 |
| 8   | 5  | -3 | 119.44  | 10.55 | 1 |
| -8  | -5 | 3  | 115.36  | 12.16 | 2 |
| -7  | -5 | 3  | 70.15   | 9.41  | 2 |
| 6   | 5  | -3 | 714.61  | 28.59 | 1 |
| 5   | 5  | -3 | 511.72  | 22.23 | 1 |
| 4   | 5  | -3 | -2.02   | 2.20  | 1 |
| 3   | 5  | -3 | 35.71   | 5.43  | 1 |
| 2   | 5  | -3 | 1016.74 | 35.12 | 1 |
| 1   | 5  | -3 | 601.92  | 22.67 | 2 |
| 1   | 5  | -3 | 623.50  | 23.20 | 1 |
| -1  | -5 | 3  | 592.93  | 19.73 | 3 |
| 0   | 5  | -3 | 342.07  | 15.08 | 2 |
| 0   | 5  | -3 | 338.44  | 14.90 | 1 |
| -1  | 5  | -3 | 436.12  | 17.60 | 1 |

-1 5 -3 465.51 18.83 2  
-2 5 -3 675.61 25.54 2  
-2 5 -3 638.50 23.09 1  
-3 5 -3 326.91 16.21 2  
-3 5 -3 316.84 13.38 1  
-4 5 -3 0.54 1.51 1  
-4 5 -3 2.98 2.52 2  
-5 5 -3 696.74 22.90 1  
-5 5 -3 669.88 28.94 2  
-6 5 -3 136.60 11.70 2  
-7 5 -3 1354.46 51.19 2  
-8 5 -3 52.15 9.27 2  
-9 5 -3 -2.14 2.90 2  
-10 5 -3 126.13 14.71 2  
-11 5 -3 23.86 7.61 2  
-12 5 -3 13.42 6.11 2  
-13 5 -3 5.23 5.15 2  
-14 5 -3 183.37 20.83 2  
-15 5 -3 153.38 20.62 2  
-16 5 -3 9.15 7.19 2  
-16 5 -3 4.28 8.49 3  
-15 -4 3 -0.63 7.51 3  
-14 -4 3 29.44 10.03 3  
-13 -4 3 1.46 6.66 3  
-11 -4 3 380.16 23.09 2  
-10 -4 3 13.17 5.43 2  
-9 -4 3 458.39 23.92 2  
-8 -4 3 167.01 12.94 2  
8 4 -3 161.51 11.24 1  
7 4 -3 343.23 17.17 1  
-7 -4 3 339.51 18.00 2  
6 4 -3 3.31 2.23 1  
5 4 -3 635.96 24.80 1  
4 4 -3 3461.33 101.97 1  
3 4 -3 13.69 3.30 1  
2 4 -3 304.59 13.70 1  
-2 -4 3 291.19 12.20 3  
1 4 -3 0.47 1.38 2  
-1 -4 3 2.13 1.34 3  
1 4 -3 1.27 1.60 1  
0 4 -3 13.16 2.83 2  
0 4 -3 11.86 2.67 1  
-1 4 -3 8.33 2.37 2  
-1 4 -3 7.55 2.21 1  
-2 4 -3 381.57 17.28 2  
-2 4 -3 424.65 15.53 1



-3 4 -3 27.49 4.97 2  
-3 4 -3 23.47 3.17 1  
-4 4 -3 -1.02 2.07 2  
-4 4 -3 0.27 1.31 1  
-5 4 -3 1015.05 31.32 1  
-5 4 -3 1082.25 39.81 2  
-6 4 -3 119.08 10.84 2  
-7 4 -3 91.45 11.19 2  
-8 4 -3 1214.01 48.20 2  
-9 4 -3 885.89 39.46 2  
-10 4 -3 35.89 8.92 2  
-11 4 -3 29.79 8.08 2  
-12 4 -3 26.57 8.74 2  
-13 4 -3 21.85 8.62 2  
-14 4 -3 91.04 15.79 2  
-15 4 -3 3.20 6.39 2  
-16 4 -3 29.94 10.75 2  
-16 -3 3 3.02 10.29 3  
-15 -3 3 42.32 12.78 3  
-14 -3 3 18.21 8.98 3  
-13 -3 3 245.64 21.70 3  
-12 -3 3 39.31 10.17 3  
-11 -3 3 2.65 4.80 2  
-10 -3 3 479.63 24.88 2  
-9 -3 3 8.75 4.51 2  
8 3 -3 245.09 13.75 1  
-8 -3 3 252.30 14.97 2  
-7 -3 3 7.43 3.45 2  
7 3 -3 5.35 3.09 1  
-6 -3 3 192.86 11.32 2  
6 3 -3 172.40 10.45 1  
-4 -3 3 124.11 8.61 3  
4 3 -3 133.39 8.26 1  
-3 -3 3 112.19 7.33 3  
3 3 -3 114.96 7.43 1  
2 3 -3 74.93 5.73 1  
-2 -3 3 67.17 4.89 3  
-1 -3 3 577.73 18.84 3  
1 3 -3 566.73 20.40 1  
0 3 -3 1776.41 50.55 1  
0 3 -3 1579.33 50.75 2  
-1 3 -3 35.35 4.35 2  
-1 3 -3 36.20 3.81 1  
-2 3 -3 110.42 7.39 2  
-2 3 -3 87.92 5.36 1  
-3 3 -3 1418.37 40.89 1

|     |    |    |         |       |   |
|-----|----|----|---------|-------|---|
| -3  | 3  | -3 | 1325.39 | 46.05 | 2 |
| -4  | 3  | -3 | 294.56  | 15.43 | 2 |
| -4  | 3  | -3 | 297.83  | 10.78 | 1 |
| -5  | 3  | -3 | 971.36  | 36.86 | 2 |
| -6  | 3  | -3 | 67.28   | 8.81  | 2 |
| -7  | 3  | -3 | 4.60    | 3.77  | 2 |
| -8  | 3  | -3 | 183.40  | 14.40 | 2 |
| -9  | 3  | -3 | 371.11  | 22.21 | 2 |
| -10 | 3  | -3 | 276.36  | 19.58 | 2 |
| -11 | 3  | -3 | 73.04   | 12.14 | 2 |
| -12 | 3  | -3 | 55.94   | 11.57 | 2 |
| -13 | 3  | -3 | 9.78    | 6.69  | 2 |
| -14 | 3  | -3 | 36.05   | 11.47 | 2 |
| -15 | 3  | -3 | 129.81  | 19.99 | 2 |
| -16 | 3  | -3 | 4.13    | 7.77  | 2 |
| -16 | -2 | 3  | 6.91    | 10.06 | 3 |
| -15 | -2 | 3  | 9.93    | 8.37  | 3 |
| -14 | -2 | 3  | 10.89   | 7.66  | 3 |
| -13 | -2 | 3  | 0.16    | 5.14  | 3 |
| -12 | -2 | 3  | 32.17   | 9.26  | 3 |
| -11 | -2 | 3  | 1.79    | 4.07  | 2 |
| -11 | -2 | 3  | 3.11    | 4.65  | 3 |
| -10 | -2 | 3  | 140.01  | 11.87 | 2 |
| -9  | -2 | 3  | 307.45  | 17.44 | 2 |
| 8   | 2  | -3 | 140.01  | 9.25  | 1 |
| -8  | -2 | 3  | 146.80  | 10.51 | 2 |
| 7   | 2  | -3 | 288.14  | 13.67 | 1 |
| -7  | -2 | 3  | 277.54  | 14.68 | 2 |
| 6   | 2  | -3 | 478.52  | 19.12 | 1 |
| -6  | -2 | 3  | 491.98  | 20.02 | 2 |
| -5  | -2 | 3  | 249.44  | 13.62 | 3 |
| -5  | -2 | 3  | 242.89  | 11.51 | 2 |
| 4   | 2  | -3 | 395.36  | 16.14 | 1 |
| -4  | -2 | 3  | 434.12  | 17.92 | 3 |
| -3  | -2 | 3  | 169.48  | 9.11  | 3 |
| 3   | 2  | -3 | 176.16  | 9.00  | 1 |
| 2   | 2  | -3 | 60.68   | 4.88  | 1 |
| -2  | -2 | 3  | 71.74   | 4.98  | 3 |
| 1   | 2  | -3 | 22.14   | 3.02  | 1 |
| -1  | -2 | 3  | 17.09   | 2.35  | 3 |
| 1   | 2  | -3 | 15.80   | 2.00  | 2 |
| 0   | 2  | -3 | 2766.65 | 79.55 | 1 |
| -1  | 2  | -3 | 274.96  | 11.75 | 2 |
| -1  | 2  | -3 | 264.30  | 10.56 | 1 |
| -2  | 2  | -3 | 950.91  | 29.23 | 1 |
| -2  | 2  | -3 | 953.98  | 32.64 | 2 |

-3 2 -3 77.22 6.77 2  
-3 2 -3 80.01 4.64 1  
-4 2 -3 0.07 1.79 2  
-4 2 -3 -0.16 1.03 1  
-5 2 -3 1565.66 53.79 2  
-6 2 -3 1664.27 57.95 2  
-7 2 -3 2.41 3.42 2  
-8 2 -3 70.92 10.49 2  
-9 2 -3 111.43 13.23 2  
-10 2 -3 11.39 5.00 2  
-11 2 -3 532.25 30.33 2  
-12 2 -3 8.79 4.92 2  
-13 2 -3 77.36 14.32 2  
-14 2 -3 26.92 8.60 2  
-15 2 -3 137.97 19.73 2  
-16 -1 3 2.52 8.15 3  
-15 -1 3 94.45 17.10 3  
-14 -1 3 195.13 21.11 3  
-13 -1 3 13.30 7.28 3  
-12 -1 3 39.79 9.74 3  
-12 -1 3 38.61 8.34 2  
-11 -1 3 5.92 4.04 2  
-11 -1 3 4.32 5.14 3  
-10 -1 3 19.55 7.16 3  
-10 -1 3 11.03 4.69 2  
-9 -1 3 60.56 7.90 2  
-9 -1 3 63.11 9.93 3  
8 1 -3 91.24 7.03 1  
-8 -1 3 74.45 7.87 2  
-8 -1 3 79.33 10.19 3  
7 1 -3 86.46 6.52 1  
-7 -1 3 90.06 9.68 3  
-7 -1 3 85.99 7.20 2  
6 1 -3 1609.79 50.05 1  
-6 -1 3 1651.56 51.74 2  
-6 -1 3 1617.55 55.01 3  
5 1 -3 740.23 25.60 1  
-5 -1 3 755.20 25.55 2  
-5 -1 3 756.14 28.92 3  
-4 -1 3 2118.62 66.67 3  
-4 -1 3 2179.72 63.42 2  
-3 -1 3 6.74 2.37 3  
3 1 -3 5.54 2.16 1  
2 1 -3 58.94 4.62 1  
-2 -1 3 55.01 4.42 3  
1 1 -3 284.63 11.59 1

-1 -1 3 301.36 11.66 3  
0 1 -3 5248.15 146.66 1  
-1 1 -3 1561.41 45.98 1  
-1 1 -3 1552.72 48.09 2  
-2 1 -3 1530.63 48.32 2  
-2 1 -3 1518.84 44.65 1  
-3 1 -3 2.68 2.07 2  
-3 1 -3 1.11 1.35 1  
-4 1 -3 1.91 1.34 1  
-4 1 -3 0.86 1.77 2  
-5 1 -3 230.01 13.78 2  
-6 1 -3 156.39 12.00 2  
-7 1 -3 1235.23 47.29 2  
-8 1 -3 397.99 22.61 2  
-9 1 -3 645.93 31.81 2  
-10 1 -3 39.63 9.30 2  
-11 1 -3 137.80 16.78 2  
-12 1 -3 170.77 19.38 2  
-13 1 -3 236.78 23.51 2  
-14 1 -3 43.29 11.92 2  
-15 1 -3 100.26 17.99 2  
-17 0 3 4.80 8.61 3  
-16 0 3 11.17 9.40 3  
-15 0 3 7.36 8.22 3  
-14 0 3 51.68 12.44 3  
-13 0 3 10.04 6.45 3  
-12 0 3 113.77 15.11 3  
-12 0 3 130.07 13.28 2  
-11 0 3 12.04 5.07 2  
-11 0 3 12.99 6.33 3  
-10 0 3 205.48 14.04 2  
-10 0 3 193.12 15.93 3  
-9 0 3 512.37 23.17 2  
-9 0 3 498.39 25.97 3  
-8 0 3 42.67 7.77 3  
-8 0 3 26.17 5.23 2  
8 0 -3 36.21 4.33 1  
-7 0 3 164.09 12.16 3  
-7 0 3 162.57 10.06 2  
7 0 -3 162.69 8.99 1  
-6 0 3 1.17 1.85 2  
-6 0 3 2.74 2.67 3  
6 0 -3 2.80 1.77 1  
5 0 -3 1.89 1.69 1  
-5 0 3 2.43 1.97 3  
-5 0 3 1.55 1.54 2

|     |   |    |         |       |   |
|-----|---|----|---------|-------|---|
| -4  | 0 | 3  | 224.41  | 8.92  | 2 |
| -4  | 0 | 3  | 222.37  | 11.64 | 3 |
| -3  | 0 | 3  | 1965.15 | 60.50 | 3 |
| 3   | 0 | -3 | 1993.59 | 58.64 | 1 |
| -2  | 0 | 3  | 889.18  | 29.01 | 3 |
| 2   | 0 | -3 | 867.79  | 27.98 | 1 |
| -1  | 0 | 3  | 228.62  | 10.27 | 3 |
| 1   | 0 | -3 | 212.96  | 9.37  | 1 |
| 0   | 0 | -3 | 120.57  | 6.55  | 2 |
| 0   | 0 | -3 | 172.26  | 7.39  | 1 |
| -1  | 0 | -3 | 2293.84 | 66.05 | 1 |
| -1  | 0 | -3 | 2275.42 | 68.73 | 2 |
| -2  | 0 | -3 | 445.48  | 15.71 | 1 |
| -2  | 0 | -3 | 438.44  | 17.99 | 2 |
| -3  | 0 | -3 | 661.68  | 22.15 | 1 |
| -3  | 0 | -3 | 710.53  | 26.69 | 2 |
| -4  | 0 | -3 | 887.03  | 34.02 | 2 |
| -4  | 0 | -3 | 937.30  | 28.80 | 1 |
| -5  | 0 | -3 | 5.47    | 2.11  | 1 |
| -5  | 0 | -3 | 5.56    | 2.90  | 2 |
| -6  | 0 | -3 | 61.50   | 4.83  | 1 |
| -6  | 0 | -3 | 67.99   | 9.07  | 2 |
| -7  | 0 | -3 | 289.28  | 18.21 | 2 |
| -8  | 0 | -3 | 11.03   | 4.40  | 2 |
| -9  | 0 | -3 | 726.59  | 35.07 | 2 |
| -10 | 0 | -3 | 8.10    | 4.77  | 2 |
| -11 | 0 | -3 | -5.46   | 3.13  | 2 |
| -12 | 0 | -3 | 61.62   | 12.78 | 2 |
| -13 | 0 | -3 | 117.83  | 17.87 | 2 |
| -14 | 0 | -3 | 2.18    | 6.26  | 2 |
| -15 | 0 | -3 | 32.87   | 11.52 | 2 |
| -17 | 1 | 3  | 6.42    | 6.90  | 3 |
| -16 | 1 | 3  | 20.05   | 9.71  | 3 |
| -15 | 1 | 3  | -0.99   | 6.15  | 3 |
| -14 | 1 | 3  | 5.28    | 7.08  | 3 |
| -13 | 1 | 3  | 0.91    | 5.26  | 3 |
| -12 | 1 | 3  | -0.58   | 3.48  | 2 |
| -12 | 1 | 3  | -2.53   | 4.78  | 3 |
| -11 | 1 | 3  | 2.12    | 3.84  | 2 |
| -11 | 1 | 3  | 9.60    | 5.75  | 3 |
| -10 | 1 | 3  | 3.76    | 3.73  | 2 |
| -10 | 1 | 3  | 16.26   | 5.74  | 3 |
| -9  | 1 | 3  | 40.37   | 6.55  | 2 |
| -9  | 1 | 3  | 34.44   | 7.78  | 3 |
| -8  | 1 | 3  | 16.55   | 4.39  | 2 |
| -8  | 1 | 3  | 12.27   | 4.65  | 3 |

|     |    |    |         |       |   |
|-----|----|----|---------|-------|---|
| 8   | -1 | -3 | 18.58   | 3.55  | 1 |
| -7  | 1  | 3  | 564.21  | 26.14 | 3 |
| -7  | 1  | 3  | 619.74  | 23.75 | 2 |
| 7   | -1 | -3 | 620.05  | 21.79 | 1 |
| 6   | -1 | -3 | 635.11  | 22.27 | 1 |
| -6  | 1  | 3  | 606.68  | 22.94 | 2 |
| -6  | 1  | 3  | 627.07  | 25.96 | 3 |
| -5  | 1  | 3  | 3273.54 | 99.93 | 3 |
| -5  | 1  | 3  | 3325.98 | 96.53 | 2 |
| 5   | -1 | -3 | 3289.44 | 94.98 | 1 |
| -4  | 1  | 3  | 3104.62 | 89.31 | 2 |
| -4  | 1  | 3  | 3070.12 | 92.62 | 3 |
| -3  | 1  | 3  | 511.80  | 19.49 | 3 |
| -3  | 1  | 3  | 504.97  | 16.44 | 2 |
| 3   | -1 | -3 | 502.40  | 18.18 | 1 |
| 2   | -1 | -3 | 1499.66 | 45.66 | 1 |
| -2  | 1  | 3  | 1515.23 | 47.02 | 3 |
| 1   | -1 | -3 | 249.19  | 10.72 | 1 |
| 0   | -1 | -3 | 300.72  | 12.28 | 1 |
| -1  | -1 | -3 | 537.62  | 18.87 | 1 |
| -2  | -1 | -3 | 82.94   | 5.69  | 1 |
| -2  | -1 | -3 | 81.15   | 6.75  | 2 |
| -3  | -1 | -3 | 14.35   | 3.91  | 2 |
| -3  | -1 | -3 | 13.27   | 2.81  | 1 |
| -4  | -1 | -3 | 8.09    | 3.30  | 2 |
| -4  | -1 | -3 | 7.74    | 2.53  | 1 |
| -5  | -1 | -3 | 119.19  | 10.17 | 2 |
| -5  | -1 | -3 | 101.84  | 6.86  | 1 |
| -6  | -1 | -3 | 56.56   | 9.01  | 2 |
| -6  | -1 | -3 | 52.46   | 5.23  | 1 |
| -7  | -1 | -3 | 260.04  | 17.57 | 2 |
| -8  | -1 | -3 | 242.47  | 17.61 | 2 |
| -9  | -1 | -3 | 5.29    | 4.29  | 2 |
| -10 | -1 | -3 | 130.43  | 15.71 | 2 |
| -11 | -1 | -3 | 47.89   | 10.92 | 2 |
| -12 | -1 | -3 | -3.81   | 5.27  | 2 |
| -13 | -1 | -3 | 6.32    | 5.46  | 2 |
| -14 | -1 | -3 | 58.45   | 14.50 | 2 |
| -15 | -1 | -3 | -11.95  | 7.35  | 2 |
| -17 | 2  | 3  | -0.72   | 6.01  | 3 |
| -16 | 2  | 3  | 43.65   | 12.43 | 3 |
| -15 | 2  | 3  | 44.64   | 12.02 | 3 |
| -14 | 2  | 3  | 1.08    | 6.80  | 3 |
| -13 | 2  | 3  | 478.10  | 30.03 | 3 |
| -12 | 2  | 3  | 5.14    | 5.47  | 3 |
| -12 | 2  | 3  | 8.13    | 4.96  | 2 |

-11 2 3 793.47 37.51 3  
-11 2 3 772.67 33.71 2  
-10 2 3 193.46 15.81 3  
-10 2 3 211.76 14.18 2  
-9 2 3 5.55 4.00 3  
-9 2 3 1.23 2.54 2  
-8 2 3 318.26 16.11 2  
8 -2 -3 322.06 13.57 1  
-8 2 3 316.10 18.54 3  
-7 2 3 144.88 11.21 3  
-7 2 3 168.38 10.31 2  
7 -2 -3 164.21 9.14 1  
6 -2 -3 2.55 2.25 1  
-6 2 3 4.87 2.93 3  
-6 2 3 10.09 3.06 2  
5 -2 -3 139.23 7.88 1  
-5 2 3 123.42 9.01 3  
-5 2 3 135.02 7.65 2  
-4 2 3 1.77 2.14 3  
-4 2 3 1.93 1.68 2  
4 -2 -3 0.13 1.55 1  
3 -2 -3 280.32 12.28 1  
-3 2 3 269.54 12.85 3  
-3 2 3 277.59 11.04 2  
2 -2 -3 1325.07 41.19 1  
-2 2 3 1309.18 42.52 3  
1 -2 -3 917.58 30.18 1  
0 -2 -3 58.47 5.20 1  
-1 -2 -3 6.63 2.44 1  
-2 -2 -3 917.38 30.57 1  
-3 -2 -3 665.76 27.32 2  
-3 -2 -3 664.65 23.78 1  
-4 -2 -3 174.34 9.79 1  
-4 -2 -3 191.36 12.87 2  
-5 -2 -3 27.04 6.42 2  
-5 -2 -3 27.28 4.40 1  
-6 -2 -3 2.34 3.10 2  
-6 -2 -3 -0.64 2.67 1  
-7 -2 -3 108.27 13.20 2  
-8 -2 -3 7.74 4.60 2  
-9 -2 -3 22.43 7.19 2  
-10 -2 -3 14.81 6.13 2  
-11 -2 -3 31.39 8.77 2  
-12 -2 -3 3.58 6.23 2  
-13 -2 -3 197.99 23.19 2  
-14 -2 -3 109.71 18.53 2

|     |    |    |         |        |   |
|-----|----|----|---------|--------|---|
| -17 | 3  | 3  | 4.85    | 6.39   | 3 |
| -16 | 3  | 3  | 12.02   | 7.90   | 3 |
| -15 | 3  | 3  | 45.37   | 12.35  | 3 |
| -14 | 3  | 3  | 20.25   | 8.92   | 3 |
| -13 | 3  | 3  | 66.75   | 13.09  | 3 |
| -12 | 3  | 3  | 121.22  | 15.33  | 3 |
| -12 | 3  | 3  | 139.63  | 13.77  | 2 |
| -11 | 3  | 3  | 37.59   | 7.64   | 2 |
| -11 | 3  | 3  | 23.16   | 7.62   | 3 |
| -10 | 3  | 3  | -2.91   | 2.98   | 3 |
| -10 | 3  | 3  | 5.55    | 3.48   | 2 |
| -9  | 3  | 3  | 9.97    | 4.56   | 3 |
| -9  | 3  | 3  | 10.26   | 3.93   | 2 |
| -8  | 3  | 3  | 125.09  | 10.78  | 3 |
| 8   | -3 | -3 | 107.66  | 7.54   | 1 |
| -8  | 3  | 3  | 107.99  | 8.95   | 2 |
| -7  | 3  | 3  | 1111.20 | 41.25  | 3 |
| -7  | 3  | 3  | 1052.63 | 38.16  | 2 |
| 7   | -3 | -3 | 1138.17 | 36.11  | 1 |
| -6  | 3  | 3  | 4859.25 | 143.93 | 2 |
| -6  | 3  | 3  | 4916.67 | 146.94 | 3 |
| 6   | -3 | -3 | 5017.25 | 140.27 | 1 |
| -5  | 3  | 3  | 1229.11 | 42.10  | 3 |
| -5  | 3  | 3  | 1214.45 | 39.88  | 2 |
| -4  | 3  | 3  | 206.52  | 11.24  | 3 |
| 4   | -3 | -3 | 211.17  | 10.74  | 1 |
| -4  | 3  | 3  | 199.12  | 9.89   | 2 |
| 3   | -3 | -3 | 321.06  | 13.94  | 1 |
| -3  | 3  | 3  | 322.20  | 13.38  | 2 |
| -3  | 3  | 3  | 312.70  | 14.37  | 3 |
| -2  | 3  | 3  | 430.61  | 18.33  | 3 |
| 2   | -3 | -3 | 434.75  | 17.25  | 1 |
| 1   | -3 | -3 | 103.18  | 7.31   | 1 |
| 0   | -3 | -3 | 32.81   | 4.68   | 1 |
| -1  | -3 | -3 | 6.89    | 2.81   | 1 |
| -2  | -3 | -3 | 235.71  | 12.19  | 1 |
| -3  | -3 | -3 | 96.89   | 7.87   | 1 |
| -4  | -3 | -3 | 64.14   | 8.89   | 2 |
| -4  | -3 | -3 | 67.55   | 6.79   | 1 |
| -5  | -3 | -3 | 51.68   | 6.16   | 1 |
| -5  | -3 | -3 | 59.63   | 9.47   | 2 |
| -6  | -3 | -3 | 309.70  | 19.93  | 2 |
| -6  | -3 | -3 | 271.49  | 14.36  | 1 |
| -7  | -3 | -3 | 454.35  | 26.12  | 2 |
| -8  | -3 | -3 | 34.33   | 8.69   | 2 |
| -9  | -3 | -3 | 53.18   | 10.87  | 2 |



|     |    |    |        |       |   |
|-----|----|----|--------|-------|---|
| -10 | -3 | -3 | 17.73  | 7.51  | 2 |
| -11 | -3 | -3 | 17.96  | 7.99  | 2 |
| -12 | -3 | -3 | 6.46   | 6.30  | 2 |
| -13 | -3 | -3 | 25.29  | 8.95  | 2 |
| -14 | -3 | -3 | -6.36  | 7.38  | 2 |
| -17 | 4  | 3  | -4.56  | 6.25  | 3 |
| -16 | 4  | 3  | 94.06  | 17.29 | 3 |
| -15 | 4  | 3  | 440.94 | 31.00 | 3 |
| -14 | 4  | 3  | -1.90  | 5.92  | 3 |
| -13 | 4  | 3  | 98.78  | 14.77 | 3 |
| -13 | 4  | 3  | 85.77  | 12.15 | 2 |
| -12 | 4  | 3  | 157.49 | 14.00 | 2 |
| -12 | 4  | 3  | 164.41 | 17.06 | 3 |
| -11 | 4  | 3  | 70.37  | 11.51 | 3 |
| -11 | 4  | 3  | 62.91  | 9.56  | 2 |
| -10 | 4  | 3  | 234.23 | 15.49 | 2 |
| -10 | 4  | 3  | 208.04 | 16.01 | 3 |
| 9   | -4 | -3 | 156.55 | 9.61  | 1 |
| -9  | 4  | 3  | 170.71 | 13.64 | 3 |
| -9  | 4  | 3  | 182.85 | 12.60 | 2 |
| 8   | -4 | -3 | 232.91 | 11.93 | 1 |
| -8  | 4  | 3  | 244.07 | 14.11 | 2 |
| -8  | 4  | 3  | 250.42 | 15.74 | 3 |
| -7  | 4  | 3  | 6.72   | 3.23  | 3 |
| 7   | -4 | -3 | 12.88  | 3.26  | 1 |
| -7  | 4  | 3  | 6.09   | 3.13  | 2 |
| 6   | -4 | -3 | 395.18 | 16.78 | 1 |
| -6  | 4  | 3  | 384.59 | 18.80 | 3 |
| -6  | 4  | 3  | 388.79 | 17.58 | 2 |
| 5   | -4 | -3 | 111.03 | 8.00  | 1 |
| -5  | 4  | 3  | 140.27 | 8.70  | 2 |
| -5  | 4  | 3  | 130.05 | 9.24  | 3 |
| 4   | -4 | -3 | 311.35 | 14.25 | 1 |
| -4  | 4  | 3  | 295.28 | 14.56 | 3 |
| -4  | 4  | 3  | 300.07 | 14.00 | 2 |
| -3  | 4  | 3  | 37.67  | 5.36  | 3 |
| 3   | -4 | -3 | 45.13  | 5.52  | 1 |
| -3  | 4  | 3  | 43.45  | 5.34  | 2 |
| 2   | -4 | -3 | 113.23 | 8.11  | 1 |
| 1   | -4 | -3 | 108.26 | 8.00  | 1 |
| 0   | -4 | -3 | 530.25 | 21.50 | 1 |
| -1  | -4 | -3 | 210.56 | 11.90 | 1 |
| -2  | -4 | -3 | 723.48 | 27.40 | 1 |
| -3  | -4 | -3 | 7.51   | 3.41  | 1 |
| -4  | -4 | -3 | 6.57   | 3.63  | 1 |
| -5  | -4 | -3 | 73.67  | 7.90  | 1 |

|     |    |    |        |       |   |
|-----|----|----|--------|-------|---|
| -5  | -4 | -3 | 59.84  | 9.79  | 2 |
| -6  | -4 | -3 | 4.13   | 3.85  | 2 |
| -6  | -4 | -3 | 12.09  | 4.62  | 1 |
| -7  | -4 | -3 | 571.26 | 31.14 | 2 |
| -8  | -4 | -3 | 38.85  | 9.75  | 2 |
| -9  | -4 | -3 | 158.85 | 18.75 | 2 |
| -10 | -4 | -3 | 21.20  | 7.57  | 2 |
| -11 | -4 | -3 | 17.08  | 8.59  | 2 |
| -12 | -4 | -3 | 62.30  | 13.64 | 2 |
| -13 | -4 | -3 | 29.40  | 10.33 | 2 |
| -14 | -4 | -3 | 19.61  | 10.75 | 2 |
| -17 | 5  | 3  | -2.50  | 8.14  | 3 |
| -16 | 5  | 3  | 53.08  | 13.89 | 3 |
| -15 | 5  | 3  | 98.30  | 16.72 | 3 |
| -14 | 5  | 3  | 742.11 | 39.82 | 3 |
| -13 | 5  | 3  | 7.21   | 6.13  | 3 |
| -13 | 5  | 3  | -0.66  | 4.19  | 2 |
| -12 | 5  | 3  | 56.32  | 11.27 | 3 |
| -12 | 5  | 3  | 60.19  | 9.95  | 2 |
| -11 | 5  | 3  | 54.59  | 9.26  | 2 |
| -11 | 5  | 3  | 42.98  | 9.57  | 3 |
| -10 | 5  | 3  | 19.05  | 5.78  | 3 |
| -10 | 5  | 3  | 14.08  | 5.34  | 2 |
| 9   | -5 | -3 | 253.83 | 13.01 | 1 |
| -9  | 5  | 3  | 273.79 | 16.04 | 2 |
| -9  | 5  | 3  | 240.50 | 16.78 | 3 |
| 8   | -5 | -3 | 473.94 | 19.34 | 1 |
| -8  | 5  | 3  | 456.60 | 21.74 | 2 |
| -8  | 5  | 3  | 428.36 | 22.19 | 3 |
| -7  | 5  | 3  | 6.70   | 3.40  | 3 |
| -7  | 5  | 3  | 13.19  | 4.30  | 2 |
| 7   | -5 | -3 | 12.84  | 3.69  | 1 |
| -6  | 5  | 3  | 268.93 | 14.47 | 2 |
| -6  | 5  | 3  | 282.03 | 15.36 | 3 |
| -5  | 5  | 3  | 543.85 | 23.36 | 3 |
| -5  | 5  | 3  | 562.66 | 22.90 | 2 |
| 5   | -5 | -3 | 570.73 | 22.44 | 1 |
| -4  | 5  | 3  | 144.64 | 9.93  | 3 |
| 4   | -5 | -3 | 142.65 | 9.76  | 1 |
| -4  | 5  | 3  | 135.36 | 9.42  | 2 |
| -3  | 5  | 3  | 171.72 | 11.24 | 3 |
| 3   | -5 | -3 | 202.21 | 11.53 | 1 |
| -3  | 5  | 3  | 180.24 | 11.08 | 2 |
| 2   | -5 | -3 | 300.37 | 14.98 | 1 |
| 1   | -5 | -3 | 487.62 | 20.93 | 1 |
| 0   | -5 | -3 | 528.83 | 22.34 | 1 |

|     |    |    |         |       |   |
|-----|----|----|---------|-------|---|
| -1  | -5 | -3 | 953.98  | 34.59 | 1 |
| -2  | -5 | -3 | 253.11  | 14.14 | 1 |
| -3  | -5 | -3 | 539.95  | 23.29 | 1 |
| -4  | -5 | -3 | 1434.37 | 48.92 | 1 |
| -5  | -5 | -3 | 159.70  | 11.92 | 1 |
| -6  | -5 | -3 | 320.58  | 17.68 | 1 |
| -6  | -5 | -3 | 318.37  | 21.40 | 2 |
| -7  | -5 | -3 | 120.50  | 15.46 | 2 |
| -8  | -5 | -3 | 277.30  | 21.96 | 2 |
| -9  | -5 | -3 | 112.96  | 16.92 | 2 |
| -10 | -5 | -3 | -0.02   | 5.56  | 2 |
| -11 | -5 | -3 | 56.85   | 12.89 | 2 |
| -12 | -5 | -3 | 5.62    | 6.37  | 2 |
| -13 | -5 | -3 | 7.99    | 9.21  | 2 |
| -17 | 6  | 3  | 8.16    | 8.56  | 3 |
| -16 | 6  | 3  | -2.66   | 6.41  | 3 |
| -15 | 6  | 3  | 237.08  | 23.44 | 3 |
| -14 | 6  | 3  | 232.11  | 22.16 | 3 |
| -13 | 6  | 3  | 138.33  | 16.85 | 3 |
| -13 | 6  | 3  | 137.34  | 14.88 | 2 |
| -12 | 6  | 3  | 33.06   | 7.88  | 2 |
| -12 | 6  | 3  | 20.58   | 8.05  | 3 |
| -11 | 6  | 3  | 74.14   | 11.79 | 3 |
| -11 | 6  | 3  | 65.45   | 10.14 | 2 |
| -10 | 6  | 3  | -0.44   | 3.59  | 2 |
| -10 | 6  | 3  | 4.65    | 3.71  | 3 |
| -9  | 6  | 3  | 507.92  | 25.97 | 3 |
| -9  | 6  | 3  | 558.90  | 25.88 | 2 |
| 9   | -6 | -3 | 550.89  | 22.32 | 1 |
| 8   | -6 | -3 | 197.14  | 12.27 | 1 |
| -8  | 6  | 3  | 231.83  | 15.07 | 3 |
| -8  | 6  | 3  | 220.50  | 14.10 | 2 |
| 7   | -6 | -3 | 1185.24 | 40.66 | 1 |
| -7  | 6  | 3  | 1212.84 | 44.01 | 3 |
| -7  | 6  | 3  | 1183.75 | 43.29 | 2 |
| -6  | 6  | 3  | 502.58  | 22.48 | 3 |
| -6  | 6  | 3  | 492.76  | 22.17 | 2 |
| 6   | -6 | -3 | 493.89  | 21.12 | 1 |
| -5  | 6  | 3  | 515.97  | 23.07 | 2 |
| 5   | -6 | -3 | 532.03  | 22.55 | 1 |
| -5  | 6  | 3  | 554.38  | 23.43 | 3 |
| -4  | 6  | 3  | 137.33  | 10.39 | 2 |
| -4  | 6  | 3  | 163.72  | 10.89 | 3 |
| 4   | -6 | -3 | 150.55  | 10.54 | 1 |
| 3   | -6 | -3 | 133.22  | 9.56  | 1 |
| -3  | 6  | 3  | 104.18  | 8.98  | 2 |

|     |    |    |         |       |   |
|-----|----|----|---------|-------|---|
| 2   | -6 | -3 | 1786.80 | 57.98 | 1 |
| 1   | -6 | -3 | 109.87  | 9.22  | 1 |
| 0   | -6 | -3 | 398.88  | 19.11 | 1 |
| -1  | -6 | -3 | 6.33    | 3.69  | 1 |
| -2  | -6 | -3 | 3.76    | 3.38  | 1 |
| -3  | -6 | -3 | 14.62   | 4.95  | 1 |
| -4  | -6 | -3 | 22.64   | 5.87  | 1 |
| -5  | -6 | -3 | 437.93  | 22.03 | 1 |
| -6  | -6 | -3 | 9.16    | 5.44  | 2 |
| -6  | -6 | -3 | 24.12   | 6.62  | 1 |
| -7  | -6 | -3 | 278.05  | 21.40 | 2 |
| -8  | -6 | -3 | 2.52    | 4.40  | 2 |
| -9  | -6 | -3 | 38.12   | 10.17 | 2 |
| -10 | -6 | -3 | 14.58   | 7.48  | 2 |
| -11 | -6 | -3 | 114.16  | 18.61 | 2 |
| -12 | -6 | -3 | 16.60   | 9.86  | 2 |
| -13 | -6 | -3 | 6.69    | 9.41  | 2 |
| -17 | 7  | 3  | 133.03  | 20.26 | 3 |
| -16 | 7  | 3  | 98.92   | 17.70 | 3 |
| -15 | 7  | 3  | 7.10    | 8.34  | 3 |
| -14 | 7  | 3  | 2.88    | 6.74  | 3 |
| -13 | 7  | 3  | 26.30   | 7.46  | 2 |
| -13 | 7  | 3  | 7.62    | 7.10  | 3 |
| -12 | 7  | 3  | 244.92  | 18.29 | 2 |
| -12 | 7  | 3  | 241.05  | 19.36 | 3 |
| -11 | 7  | 3  | 273.91  | 19.72 | 3 |
| -11 | 7  | 3  | 282.22  | 19.01 | 2 |
| -10 | 7  | 3  | 29.04   | 7.27  | 2 |
| -10 | 7  | 3  | 26.45   | 7.03  | 3 |
| -9  | 7  | 3  | 37.57   | 7.76  | 3 |
| 9   | -7 | -3 | 50.96   | 6.90  | 1 |
| -9  | 7  | 3  | 31.47   | 6.96  | 2 |
| -8  | 7  | 3  | 395.63  | 20.85 | 2 |
| 8   | -7 | -3 | 401.06  | 18.57 | 1 |
| -8  | 7  | 3  | 373.53  | 20.54 | 3 |
| -7  | 7  | 3  | 42.41   | 7.27  | 2 |
| -7  | 7  | 3  | 45.54   | 7.35  | 3 |
| 6   | -7 | -3 | 1004.10 | 36.66 | 1 |
| -6  | 7  | 3  | 993.55  | 37.71 | 3 |
| -6  | 7  | 3  | 1009.84 | 38.31 | 2 |
| 5   | -7 | -3 | 119.80  | 9.69  | 1 |
| -5  | 7  | 3  | 114.87  | 10.07 | 2 |
| -4  | 7  | 3  | 1445.58 | 50.69 | 2 |
| 4   | -7 | -3 | 1407.54 | 48.54 | 1 |
| -3  | 7  | 3  | 53.79   | 8.11  | 2 |
| 3   | -7 | -3 | 39.81   | 6.61  | 1 |

|     |    |    |         |       |   |
|-----|----|----|---------|-------|---|
| 2   | -7 | -3 | 305.35  | 16.73 | 1 |
| 1   | -7 | -3 | 59.07   | 8.03  | 1 |
| 0   | -7 | -3 | 70.04   | 8.92  | 1 |
| -1  | -7 | -3 | 1095.07 | 41.33 | 1 |
| -2  | -7 | -3 | 1506.35 | 53.24 | 1 |
| -3  | -7 | -3 | 105.03  | 11.17 | 1 |
| -4  | -7 | -3 | -0.76   | 3.96  | 1 |
| -5  | -7 | -3 | 456.92  | 23.56 | 1 |
| -6  | -7 | -3 | 4.87    | 4.95  | 1 |
| -7  | -7 | -3 | 194.69  | 20.71 | 2 |
| -8  | -7 | -3 | 66.28   | 13.40 | 2 |
| -9  | -7 | -3 | 93.78   | 16.73 | 2 |
| -10 | -7 | -3 | 8.61    | 7.16  | 2 |
| -11 | -7 | -3 | 3.18    | 6.45  | 2 |
| -12 | -7 | -3 | 11.99   | 9.02  | 2 |
| -17 | 8  | 3  | 154.14  | 20.98 | 3 |
| -16 | 8  | 3  | 1.31    | 6.07  | 3 |
| -15 | 8  | 3  | 89.20   | 15.83 | 3 |
| -14 | 8  | 3  | 33.20   | 9.95  | 3 |
| -13 | 8  | 3  | 99.22   | 13.82 | 2 |
| -13 | 8  | 3  | 89.38   | 14.07 | 3 |
| -12 | 8  | 3  | 21.43   | 8.01  | 3 |
| -12 | 8  | 3  | 11.27   | 6.20  | 2 |
| -11 | 8  | 3  | 3.95    | 5.00  | 3 |
| -11 | 8  | 3  | 2.19    | 3.95  | 2 |
| -10 | 8  | 3  | 250.61  | 17.45 | 3 |
| -10 | 8  | 3  | 241.21  | 17.25 | 2 |
| -9  | 8  | 3  | 78.20   | 10.57 | 2 |
| -9  | 8  | 3  | 76.81   | 10.07 | 3 |
| 9   | -8 | -3 | 83.92   | 8.74  | 1 |
| 8   | -8 | -3 | 451.66  | 21.74 | 1 |
| -8  | 8  | 3  | 532.09  | 25.42 | 2 |
| -8  | 8  | 3  | 523.18  | 25.12 | 3 |
| 7   | -8 | -3 | 653.21  | 27.52 | 1 |
| -7  | 8  | 3  | 654.86  | 29.80 | 2 |
| -7  | 8  | 3  | 707.09  | 29.60 | 3 |
| 6   | -8 | -3 | 46.79   | 7.44  | 1 |
| -6  | 8  | 3  | 58.02   | 8.80  | 2 |
| -5  | 8  | 3  | 687.62  | 29.90 | 2 |
| 5   | -8 | -3 | 676.94  | 28.26 | 1 |
| -4  | 8  | 3  | 928.37  | 37.17 | 2 |
| 4   | -8 | -3 | 884.28  | 35.03 | 1 |
| 3   | -8 | -3 | 268.34  | 16.05 | 1 |
| -3  | 8  | 3  | 274.33  | 17.11 | 2 |
| 2   | -8 | -3 | 132.85  | 11.13 | 1 |
| 1   | -8 | -3 | 880.46  | 35.37 | 1 |

|     |    |    |         |       |   |
|-----|----|----|---------|-------|---|
| 0   | -8 | -3 | 46.71   | 8.39  | 1 |
| -1  | -8 | -3 | 107.04  | 11.73 | 1 |
| -2  | -8 | -3 | 400.11  | 22.26 | 1 |
| -3  | -8 | -3 | 753.48  | 33.46 | 1 |
| -4  | -8 | -3 | 3.55    | 3.97  | 1 |
| -5  | -8 | -3 | 68.35   | 10.48 | 1 |
| -6  | -8 | -3 | 22.05   | 6.92  | 1 |
| -7  | -8 | -3 | 36.40   | 9.22  | 2 |
| -8  | -8 | -3 | 434.68  | 31.09 | 2 |
| -9  | -8 | -3 | 28.08   | 9.98  | 2 |
| -10 | -8 | -3 | 27.81   | 11.52 | 2 |
| -11 | -8 | -3 | -2.23   | 8.62  | 2 |
| -17 | 9  | 3  | 14.29   | 10.02 | 3 |
| -16 | 9  | 3  | 4.87    | 8.50  | 3 |
| -15 | 9  | 3  | 9.25    | 8.75  | 3 |
| -14 | 9  | 3  | 238.58  | 21.30 | 3 |
| -13 | 9  | 3  | 540.11  | 32.22 | 3 |
| -13 | 9  | 3  | 614.42  | 32.48 | 2 |
| -12 | 9  | 3  | 7.67    | 5.33  | 2 |
| -12 | 9  | 3  | 4.42    | 5.92  | 3 |
| -11 | 9  | 3  | 43.78   | 9.89  | 3 |
| -11 | 9  | 3  | 53.20   | 10.12 | 2 |
| -10 | 9  | 3  | 271.76  | 18.06 | 3 |
| -10 | 9  | 3  | 240.99  | 17.34 | 2 |
| 9   | -9 | -3 | 4.71    | 3.72  | 1 |
| -9  | 9  | 3  | 5.24    | 4.61  | 3 |
| -9  | 9  | 3  | 1.51    | 3.91  | 2 |
| -8  | 9  | 3  | 98.03   | 11.61 | 2 |
| -8  | 9  | 3  | 15.91   | 5.96  | 3 |
| 7   | -9 | -3 | 42.51   | 7.52  | 1 |
| -7  | 9  | 3  | 40.54   | 8.44  | 2 |
| -6  | 9  | 3  | 1074.12 | 43.44 | 2 |
| 6   | -9 | -3 | 1090.11 | 41.12 | 1 |
| -6  | 9  | 3  | 1112.40 | 41.91 | 3 |
| 5   | -9 | -3 | 12.41   | 5.22  | 1 |
| -5  | 9  | 3  | 11.35   | 5.49  | 2 |
| 4   | -9 | -3 | 126.56  | 11.12 | 1 |
| -4  | 9  | 3  | 111.19  | 12.23 | 2 |
| 3   | -9 | -3 | 365.15  | 20.12 | 1 |
| 2   | -9 | -3 | 136.64  | 11.78 | 1 |
| 1   | -9 | -3 | 350.17  | 20.48 | 1 |
| 0   | -9 | -3 | 34.09   | 7.90  | 1 |
| -1  | -9 | -3 | 28.80   | 7.25  | 1 |
| -2  | -9 | -3 | 65.64   | 10.51 | 1 |
| -3  | -9 | -3 | 4.45    | 4.36  | 1 |
| -4  | -9 | -3 | 4.92    | 5.13  | 1 |

-5 -9 -3 18.64 6.54 1  
-6 -9 -3 59.80 10.67 1  
-7 -9 -3 36.75 11.20 2  
-8 -9 -3 94.91 17.55 2  
-9 -9 -3 106.59 18.82 2  
-10 -9 -3 52.78 15.25 2  
-11 -9 -3 188.46 28.49 2  
-17 10 3 8.78 9.26 3  
-16 10 3 24.63 11.29 3  
-15 10 3 101.25 16.58 3  
-14 10 3 77.43 14.36 3  
-13 10 3 157.64 17.57 2  
-13 10 3 179.43 18.60 3  
-12 10 3 183.68 17.95 3  
-12 10 3 232.20 18.40 2  
-11 10 3 -1.02 4.08 3  
-11 10 3 -4.49 3.60 2  
-10 10 3 9.46 5.38 3  
-10 10 3 1.35 4.33 2  
9 -10 -3 38.57 7.82 1  
-9 10 3 23.68 6.65 2  
8 -10 -3 150.46 12.65 1  
-8 10 3 149.20 13.02 3  
-8 10 3 140.19 14.54 2  
-7 10 3 73.72 10.31 3  
7 -10 -3 95.12 10.71 1  
-7 10 3 81.74 11.53 2  
-6 10 3 17.00 6.33 3  
-6 10 3 16.74 5.79 2  
6 -10 -3 14.76 5.07 1  
-5 10 3 213.88 16.58 2  
5 -10 -3 218.59 15.40 1  
-4 10 3 179.43 15.44 2  
4 -10 -3 192.67 14.47 1  
3 -10 -3 291.25 18.16 1  
2 -10 -3 94.07 11.50 1  
1 -10 -3 1.21 3.66 1  
0 -10 -3 81.63 11.72 1  
-1 -10 -3 61.65 10.52 1  
-2 -10 -3 95.61 13.02 1  
-3 -10 -3 10.82 6.06 1  
-4 -10 -3 3.92 5.70 1  
-5 -10 -3 77.90 12.07 1  
-6 -10 -3 134.98 15.71 1  
-7 -10 -3 104.53 19.36 2  
-8 -10 -3 18.48 8.81 2

|     |     |    |        |       |   |
|-----|-----|----|--------|-------|---|
| -9  | -10 | -3 | 243.46 | 30.65 | 2 |
| -10 | -10 | -3 | 37.05  | 14.61 | 2 |
| -14 | 11  | 3  | 52.96  | 12.22 | 2 |
| -13 | 11  | 3  | 9.95   | 6.33  | 2 |
| -12 | 11  | 3  | 5.57   | 5.62  | 2 |
| -12 | 11  | 3  | -2.20  | 5.78  | 3 |
| -11 | 11  | 3  | 7.24   | 5.73  | 3 |
| -11 | 11  | 3  | 3.60   | 4.86  | 2 |
| -10 | 11  | 3  | 2.32   | 4.35  | 3 |
| -10 | 11  | 3  | 1.83   | 4.63  | 2 |
| -9  | 11  | 3  | 14.68  | 6.17  | 2 |
| 9   | -11 | -3 | 3.92   | 3.61  | 1 |
| -9  | 11  | 3  | 5.79   | 5.48  | 3 |
| -8  | 11  | 3  | 338.85 | 20.70 | 3 |
| -8  | 11  | 3  | 298.97 | 21.01 | 2 |
| 8   | -11 | -3 | 334.83 | 19.67 | 1 |
| 7   | -11 | -3 | 25.56  | 7.56  | 1 |
| -7  | 11  | 3  | 34.48  | 8.18  | 2 |
| -7  | 11  | 3  | 23.83  | 7.96  | 3 |
| 6   | -11 | -3 | 94.30  | 11.74 | 1 |
| -6  | 11  | 3  | 89.29  | 12.77 | 2 |
| -5  | 11  | 3  | 90.10  | 12.77 | 2 |
| 5   | -11 | -3 | 108.12 | 12.66 | 1 |
| 4   | -11 | -3 | 95.70  | 12.26 | 1 |
| -4  | 11  | 3  | 115.31 | 14.21 | 2 |
| 3   | -11 | -3 | 175.52 | 15.36 | 1 |
| 2   | -11 | -3 | 0.67   | 4.51  | 1 |
| 1   | -11 | -3 | 92.51  | 12.64 | 1 |
| 0   | -11 | -3 | 41.46  | 9.07  | 1 |
| -1  | -11 | -3 | 59.26  | 11.43 | 1 |
| -2  | -11 | -3 | 28.97  | 8.37  | 1 |
| -3  | -11 | -3 | 132.83 | 15.58 | 1 |
| -4  | -11 | -3 | 38.49  | 9.52  | 1 |
| -5  | -11 | -3 | 21.05  | 7.81  | 1 |
| -6  | -11 | -3 | 3.98   | 6.75  | 1 |
| -8  | -11 | -3 | 54.20  | 14.72 | 2 |
| -9  | -11 | -3 | 330.20 | 37.98 | 2 |
| -14 | 12  | 3  | 6.01   | 6.72  | 2 |
| -13 | 12  | 3  | 1.79   | 6.66  | 2 |
| -12 | 12  | 3  | 9.09   | 6.48  | 2 |
| -11 | 12  | 3  | 32.85  | 8.95  | 2 |
| -10 | 12  | 3  | 20.41  | 8.19  | 2 |
| 9   | -12 | -3 | 163.00 | 14.47 | 1 |
| -9  | 12  | 3  | 151.80 | 16.86 | 2 |
| 8   | -12 | -3 | -3.99  | 5.12  | 1 |
| -8  | 12  | 3  | 6.22   | 5.37  | 2 |



|     |     |    |        |       |   |
|-----|-----|----|--------|-------|---|
| -7  | 12  | 3  | 49.14  | 10.20 | 2 |
| 7   | -12 | -3 | 67.38  | 11.11 | 1 |
| -6  | 12  | 3  | 50.48  | 10.01 | 2 |
| 6   | -12 | -3 | 45.46  | 9.53  | 1 |
| 5   | -12 | -3 | 0.70   | 5.36  | 1 |
| -5  | 12  | 3  | 4.09   | 5.38  | 2 |
| 4   | -12 | -3 | 12.57  | 6.97  | 1 |
| 3   | -12 | -3 | 41.48  | 10.02 | 1 |
| 2   | -12 | -3 | 2.46   | 6.17  | 1 |
| 1   | -12 | -3 | 3.34   | 4.22  | 1 |
| 0   | -12 | -3 | -0.13  | 4.76  | 1 |
| -1  | -12 | -3 | 5.98   | 4.97  | 1 |
| -2  | -12 | -3 | -0.02  | 5.64  | 1 |
| -3  | -12 | -3 | 157.35 | 17.37 | 1 |
| -4  | -12 | -3 | 198.84 | 19.45 | 1 |
| -5  | -12 | -3 | 0.14   | 6.42  | 1 |
| -6  | -12 | -3 | 0.96   | 7.77  | 1 |
| -8  | -12 | -3 | 51.31  | 17.59 | 2 |
| -14 | 13  | 3  | 30.55  | 10.52 | 2 |
| -13 | 13  | 3  | 4.26   | 6.76  | 2 |
| -12 | 13  | 3  | -0.97  | 5.13  | 2 |
| -11 | 13  | 3  | 36.92  | 9.72  | 2 |
| -10 | 13  | 3  | 59.07  | 11.95 | 2 |
| 9   | -13 | -3 | 34.34  | 9.24  | 1 |
| -9  | 13  | 3  | 24.92  | 8.35  | 2 |
| -8  | 13  | 3  | 10.80  | 6.59  | 2 |
| 8   | -13 | -3 | 9.54   | 7.00  | 1 |
| -7  | 13  | 3  | 5.96   | 6.05  | 2 |
| 7   | -13 | -3 | -2.22  | 4.97  | 1 |
| -6  | 13  | 3  | 52.50  | 10.95 | 2 |
| 6   | -13 | -3 | 61.19  | 11.63 | 1 |
| 5   | -13 | -3 | 90.78  | 13.63 | 1 |
| -5  | 13  | 3  | 94.99  | 14.76 | 2 |
| 4   | -13 | -3 | 32.01  | 9.06  | 1 |
| 3   | -13 | -3 | 29.34  | 9.08  | 1 |
| 2   | -13 | -3 | -0.04  | 6.03  | 1 |
| 1   | -13 | -3 | 23.12  | 8.59  | 1 |
| 0   | -13 | -3 | 31.51  | 9.08  | 1 |
| -1  | -13 | -3 | 337.22 | 23.53 | 1 |
| -2  | -13 | -3 | 230.30 | 19.55 | 1 |
| -3  | -13 | -3 | 51.60  | 11.90 | 1 |
| -4  | -13 | -3 | 59.78  | 13.19 | 1 |
| -5  | -13 | -3 | 4.67   | 8.15  | 1 |
| -14 | 14  | 3  | 41.47  | 11.87 | 2 |
| -13 | 14  | 3  | 40.85  | 11.56 | 2 |
| -12 | 14  | 3  | 16.97  | 8.28  | 2 |

|     |     |    |        |       |   |
|-----|-----|----|--------|-------|---|
| -11 | 14  | 3  | 29.16  | 10.40 | 2 |
| -10 | 14  | 3  | 76.15  | 13.71 | 2 |
| -9  | 14  | 3  | 16.03  | 6.67  | 2 |
| 9   | -14 | -3 | 8.50   | 7.78  | 1 |
| -8  | 14  | 3  | 5.77   | 6.86  | 2 |
| 8   | -14 | -3 | 10.25  | 7.15  | 1 |
| 7   | -14 | -3 | 2.08   | 6.64  | 1 |
| -7  | 14  | 3  | 6.80   | 5.91  | 2 |
| -6  | 14  | 3  | 178.10 | 20.03 | 2 |
| 6   | -14 | -3 | 175.00 | 18.00 | 1 |
| 5   | -14 | -3 | 233.63 | 19.57 | 1 |
| 4   | -14 | -3 | 25.06  | 8.88  | 1 |
| 3   | -14 | -3 | 6.08   | 7.04  | 1 |
| 2   | -14 | -3 | -4.74  | 6.49  | 1 |
| 1   | -14 | -3 | -0.44  | 6.69  | 1 |
| 0   | -14 | -3 | 91.10  | 15.02 | 1 |
| -1  | -14 | -3 | 62.11  | 12.54 | 1 |
| -2  | -14 | -3 | -5.94  | 5.68  | 1 |
| -3  | -14 | -3 | -3.39  | 6.54  | 1 |
| -4  | -14 | -3 | 2.08   | 7.62  | 1 |
| -5  | -14 | -3 | -5.66  | 7.38  | 1 |
| -14 | 15  | 3  | 11.18  | 8.80  | 2 |
| -13 | 15  | 3  | 33.82  | 9.58  | 2 |
| -12 | 15  | 3  | 150.62 | 19.93 | 2 |
| -11 | 15  | 3  | 13.67  | 7.81  | 2 |
| -10 | 15  | 3  | 4.22   | 6.00  | 2 |
| 9   | -15 | -3 | 17.26  | 8.77  | 1 |
| -9  | 15  | 3  | 9.22   | 7.26  | 2 |
| 8   | -15 | -3 | 16.32  | 8.31  | 1 |
| -8  | 15  | 3  | 19.79  | 8.78  | 2 |
| 7   | -15 | -3 | 40.55  | 10.49 | 1 |
| -7  | 15  | 3  | 39.47  | 11.45 | 2 |
| 6   | -15 | -3 | 92.16  | 15.39 | 1 |
| 5   | -15 | -3 | 31.76  | 10.50 | 1 |
| 4   | -15 | -3 | 6.44   | 8.37  | 1 |
| 3   | -15 | -3 | 5.81   | 8.73  | 1 |
| 2   | -15 | -3 | 8.89   | 8.71  | 1 |
| 1   | -15 | -3 | -11.45 | 5.90  | 1 |
| 0   | -15 | -3 | 82.66  | 15.11 | 1 |
| -1  | -15 | -3 | 79.33  | 14.63 | 1 |
| -2  | -15 | -3 | 40.40  | 11.45 | 1 |
| -3  | -15 | -3 | 1.92   | 7.78  | 1 |
| -4  | -15 | -3 | -5.48  | 7.65  | 1 |
| -5  | -15 | -3 | 20.10  | 10.81 | 1 |
| -14 | 16  | 3  | 53.46  | 14.68 | 2 |
| -13 | 16  | 3  | -5.72  | 7.03  | 2 |

|     |     |    |        |       |   |
|-----|-----|----|--------|-------|---|
| -12 | 16  | 3  | 23.36  | 9.98  | 2 |
| -11 | 16  | 3  | 3.59   | 6.68  | 2 |
| -10 | 16  | 3  | 2.42   | 6.40  | 2 |
| -9  | 16  | 3  | 67.79  | 13.74 | 2 |
| 9   | -16 | -3 | 70.58  | 14.22 | 1 |
| -8  | 16  | 3  | 136.18 | 19.40 | 2 |
| 8   | -16 | -3 | 193.90 | 20.37 | 1 |
| -7  | 16  | 3  | 49.81  | 12.66 | 2 |
| 7   | -16 | -3 | 47.07  | 12.87 | 1 |
| 6   | -16 | -3 | 114.10 | 17.25 | 1 |
| 5   | -16 | -3 | 41.56  | 12.31 | 1 |
| 4   | -16 | -3 | 70.95  | 15.33 | 1 |
| 3   | -16 | -3 | 12.04  | 9.57  | 1 |
| 2   | -16 | -3 | 17.26  | 10.80 | 1 |
| 1   | -16 | -3 | -5.58  | 7.00  | 1 |
| 0   | -16 | -3 | -6.49  | 6.88  | 1 |
| -1  | -16 | -3 | -2.46  | 8.41  | 1 |
| -2  | -16 | -3 | 1.39   | 8.65  | 1 |
| -3  | -16 | -3 | 10.36  | 10.00 | 1 |
| -4  | -16 | -3 | 24.97  | 12.27 | 1 |
| -13 | 17  | 3  | 3.89   | 8.84  | 2 |
| -12 | 17  | 3  | -9.38  | 6.48  | 2 |
| -11 | 17  | 3  | 1.39   | 7.86  | 2 |
| -10 | 17  | 3  | 19.29  | 9.21  | 2 |
| -9  | 17  | 3  | 12.75  | 8.34  | 2 |
| 9   | -17 | -3 | 35.66  | 12.37 | 1 |
| -8  | 17  | 3  | 4.79   | 9.09  | 2 |
| 8   | -17 | -3 | 27.65  | 10.43 | 1 |
| 7   | -17 | -3 | 55.39  | 13.54 | 1 |
| 6   | -17 | -3 | 13.21  | 9.37  | 1 |
| 5   | -17 | -3 | 9.90   | 9.71  | 1 |
| 4   | -17 | -3 | 4.22   | 8.95  | 1 |
| 3   | -17 | -3 | 35.79  | 11.48 | 1 |
| 2   | -17 | -3 | 107.61 | 18.28 | 1 |
| 1   | -17 | -3 | 21.58  | 11.24 | 1 |
| 0   | -17 | -3 | -1.09  | 8.55  | 1 |
| -1  | -17 | -3 | 11.06  | 9.44  | 1 |
| -2  | -17 | -3 | 1.73   | 10.36 | 1 |
| -11 | 18  | 3  | 3.99   | 8.64  | 2 |
| -10 | 18  | 3  | 9.61   | 9.55  | 2 |
| 9   | -18 | -3 | 17.19  | 11.16 | 1 |
| -9  | 18  | 3  | 5.68   | 11.13 | 2 |
| 8   | -18 | -3 | 58.49  | 14.32 | 1 |
| 7   | -18 | -3 | 14.75  | 9.71  | 1 |
| 6   | -18 | -3 | 44.00  | 14.32 | 1 |
| 5   | -18 | -3 | 9.97   | 10.00 | 1 |

|    |     |    |        |       |   |
|----|-----|----|--------|-------|---|
| 4  | -18 | -3 | 10.38  | 9.96  | 1 |
| 3  | -18 | -3 | -8.74  | 8.33  | 1 |
| 2  | -18 | -3 | 19.49  | 10.20 | 1 |
| 1  | -18 | -3 | 6.78   | 11.08 | 1 |
| 0  | -18 | -3 | -11.53 | 9.36  | 1 |
| 9  | -19 | -3 | -12.88 | 8.93  | 1 |
| 8  | -19 | -3 | 23.38  | 11.33 | 1 |
| 7  | -19 | -3 | 8.29   | 10.59 | 1 |
| 6  | -19 | -3 | 0.19   | 8.29  | 1 |
| 5  | -19 | -3 | -0.22  | 7.47  | 1 |
| 4  | -19 | -3 | 13.01  | 7.97  | 1 |
| 3  | -19 | -3 | 1.76   | 7.96  | 1 |
| 0  | -20 | 4  | -10.40 | 6.50  | 4 |
| 0  | -20 | 4  | 4.85   | 7.55  | 1 |
| 1  | -20 | 4  | -6.46  | 6.60  | 1 |
| 2  | -20 | 4  | 10.34  | 7.74  | 1 |
| 3  | -20 | 4  | 8.27   | 8.63  | 1 |
| 4  | -20 | 4  | -1.02  | 8.48  | 1 |
| -4 | 20  | -4 | -6.72  | 6.26  | 2 |
| 5  | -20 | 4  | 5.51   | 9.29  | 1 |
| -5 | 20  | -4 | 3.34   | 7.26  | 2 |
| -6 | 20  | -4 | 6.57   | 7.92  | 2 |
| 6  | -20 | 4  | 32.29  | 11.55 | 1 |
| -7 | 20  | -4 | 1.65   | 7.27  | 2 |
| -8 | 20  | -4 | -1.22  | 7.07  | 2 |
| -2 | -19 | 4  | 31.96  | 15.33 | 1 |
| -2 | -19 | 4  | 22.84  | 10.81 | 4 |
| -1 | -19 | 4  | 11.71  | 9.39  | 4 |
| -1 | -19 | 4  | 5.67   | 11.26 | 1 |
| 0  | -19 | 4  | 17.88  | 8.90  | 4 |
| 0  | -19 | 4  | 0.42   | 8.72  | 1 |
| 1  | -19 | 4  | 51.61  | 12.25 | 4 |
| 1  | -19 | 4  | 40.58  | 12.61 | 1 |
| 2  | -19 | 4  | 12.29  | 8.53  | 4 |
| 2  | -19 | 4  | 3.91   | 8.57  | 1 |
| 3  | -19 | 4  | 5.56   | 8.60  | 1 |
| 3  | -19 | 4  | -0.76  | 7.36  | 4 |
| -4 | 19  | -4 | 33.31  | 11.96 | 2 |
| 4  | -19 | 4  | 16.06  | 9.78  | 1 |
| -5 | 19  | -4 | 33.99  | 12.49 | 2 |
| 5  | -19 | 4  | 39.35  | 12.29 | 1 |
| -6 | 19  | -4 | 17.51  | 10.62 | 2 |
| 6  | -19 | 4  | 15.80  | 9.82  | 1 |
| 7  | -19 | 4  | 10.82  | 9.82  | 1 |
| -7 | 19  | -4 | -1.90  | 7.42  | 2 |
| -8 | 19  | -4 | 6.57   | 8.77  | 2 |

|     |     |    |        |       |   |
|-----|-----|----|--------|-------|---|
| -9  | 19  | -4 | 10.64  | 10.44 | 2 |
| -10 | 19  | -4 | 35.35  | 13.47 | 2 |
| -4  | -18 | 4  | 5.75   | 12.23 | 1 |
| -4  | -18 | 4  | 7.19   | 10.05 | 4 |
| -3  | -18 | 4  | 7.50   | 9.09  | 4 |
| -3  | -18 | 4  | -10.44 | 10.03 | 1 |
| -2  | -18 | 4  | 38.80  | 14.12 | 1 |
| -2  | -18 | 4  | 20.73  | 9.95  | 4 |
| -1  | -18 | 4  | 28.71  | 11.65 | 1 |
| -1  | -18 | 4  | 23.55  | 9.83  | 4 |
| 0   | -18 | 4  | 13.72  | 9.65  | 1 |
| 0   | -18 | 4  | 13.12  | 8.70  | 4 |
| 1   | -18 | 4  | 13.06  | 8.60  | 4 |
| 1   | -18 | 4  | 5.00   | 7.87  | 1 |
| 2   | -18 | 4  | 14.26  | 9.24  | 1 |
| 2   | -18 | 4  | 31.88  | 11.07 | 4 |
| -3  | 18  | -4 | 5.71   | 9.58  | 2 |
| 3   | -18 | 4  | 9.17   | 8.67  | 4 |
| 3   | -18 | 4  | 1.06   | 8.36  | 1 |
| -4  | 18  | -4 | 65.51  | 15.09 | 2 |
| 4   | -18 | 4  | 88.19  | 15.04 | 4 |
| 4   | -18 | 4  | 63.54  | 14.48 | 1 |
| -5  | 18  | -4 | 41.01  | 13.10 | 2 |
| 5   | -18 | 4  | 65.72  | 14.04 | 1 |
| 5   | -18 | 4  | 42.85  | 11.96 | 4 |
| -6  | 18  | -4 | 4.20   | 8.04  | 2 |
| 6   | -18 | 4  | 8.09   | 8.45  | 1 |
| -7  | 18  | -4 | 4.35   | 6.84  | 2 |
| 7   | -18 | 4  | 0.15   | 8.17  | 1 |
| -8  | 18  | -4 | 6.32   | 8.88  | 2 |
| -9  | 18  | -4 | -0.60  | 7.22  | 2 |
| -10 | 18  | -4 | -2.72  | 6.93  | 2 |
| -11 | 18  | -4 | 46.32  | 14.30 | 2 |
| -6  | -17 | 4  | 14.85  | 13.78 | 1 |
| -6  | -17 | 4  | -19.49 | 9.41  | 4 |
| -5  | -17 | 4  | 51.11  | 13.67 | 4 |
| -5  | -17 | 4  | 47.97  | 15.49 | 1 |
| -4  | -17 | 4  | 1.95   | 7.93  | 4 |
| -4  | -17 | 4  | 2.87   | 9.98  | 1 |
| -3  | -17 | 4  | 22.30  | 9.48  | 4 |
| -3  | -17 | 4  | 15.55  | 10.27 | 1 |
| -2  | -17 | 4  | 67.38  | 11.73 | 4 |
| -2  | -17 | 4  | 46.64  | 12.01 | 1 |
| -1  | -17 | 4  | 39.97  | 9.95  | 4 |
| -1  | -17 | 4  | 28.49  | 9.92  | 1 |
| 0   | -17 | 4  | 41.37  | 12.01 | 1 |

|     |     |    |        |       |   |
|-----|-----|----|--------|-------|---|
| 0   | -17 | 4  | 22.55  | 9.47  | 4 |
| 1   | -17 | 4  | -7.86  | 6.25  | 1 |
| 1   | -17 | 4  | -4.42  | 6.47  | 4 |
| 2   | -17 | 4  | 200.33 | 20.40 | 4 |
| -2  | 17  | -4 | 189.00 | 22.81 | 2 |
| 2   | -17 | 4  | 164.93 | 18.89 | 1 |
| -3  | 17  | -4 | 33.03  | 11.68 | 2 |
| 3   | -17 | 4  | 47.97  | 12.03 | 1 |
| 3   | -17 | 4  | 58.40  | 12.35 | 4 |
| 4   | -17 | 4  | 15.08  | 9.09  | 4 |
| -4  | 17  | -4 | 8.35   | 8.98  | 2 |
| 4   | -17 | 4  | 3.66   | 8.62  | 1 |
| 5   | -17 | 4  | 126.43 | 16.90 | 1 |
| 5   | -17 | 4  | 156.79 | 18.18 | 4 |
| -5  | 17  | -4 | 108.88 | 17.97 | 2 |
| -6  | 17  | -4 | 23.50  | 9.81  | 2 |
| 6   | -17 | 4  | 45.56  | 11.75 | 1 |
| 6   | -17 | 4  | 44.43  | 11.85 | 4 |
| 7   | -17 | 4  | 115.76 | 15.69 | 1 |
| -7  | 17  | -4 | 87.20  | 16.84 | 2 |
| -8  | 17  | -4 | 36.18  | 11.08 | 2 |
| -9  | 17  | -4 | 12.31  | 8.38  | 2 |
| -10 | 17  | -4 | 60.53  | 14.88 | 2 |
| -11 | 17  | -4 | 31.01  | 11.46 | 2 |
| -12 | 17  | -4 | 3.33   | 10.54 | 2 |
| -7  | -16 | 4  | 119.01 | 20.99 | 4 |
| -7  | -16 | 4  | 58.38  | 17.84 | 1 |
| -6  | -16 | 4  | 0.68   | 11.22 | 1 |
| -6  | -16 | 4  | 22.59  | 10.86 | 4 |
| -5  | -16 | 4  | 2.23   | 8.57  | 1 |
| -5  | -16 | 4  | 7.79   | 6.33  | 4 |
| -4  | -16 | 4  | 148.34 | 18.31 | 4 |
| -4  | -16 | 4  | 125.02 | 18.48 | 1 |
| -3  | -16 | 4  | 94.62  | 14.12 | 4 |
| -3  | -16 | 4  | 87.99  | 15.17 | 1 |
| -2  | -16 | 4  | -6.64  | 6.33  | 1 |
| -2  | -16 | 4  | -2.95  | 5.18  | 4 |
| -1  | -16 | 4  | 41.04  | 11.12 | 1 |
| -1  | -16 | 4  | 54.07  | 10.48 | 4 |
| 0   | -16 | 4  | 3.12   | 7.51  | 1 |
| 0   | -16 | 4  | 3.59   | 6.74  | 4 |
| 1   | -16 | 4  | 173.93 | 18.30 | 1 |
| 1   | -16 | 4  | 165.38 | 17.65 | 4 |
| 2   | -16 | 4  | 41.53  | 11.01 | 4 |
| 2   | -16 | 4  | 33.74  | 9.61  | 1 |
| -2  | 16  | -4 | 38.21  | 11.23 | 2 |

|     |     |    |        |       |   |
|-----|-----|----|--------|-------|---|
| 3   | -16 | 4  | 6.82   | 6.37  | 1 |
| -3  | 16  | -4 | -1.90  | 6.35  | 2 |
| 3   | -16 | 4  | -6.62  | 4.53  | 4 |
| -4  | 16  | -4 | -0.61  | 6.01  | 2 |
| 4   | -16 | 4  | -2.36  | 5.76  | 1 |
| 4   | -16 | 4  | -10.24 | 5.10  | 4 |
| 5   | -16 | 4  | 37.42  | 9.96  | 1 |
| 5   | -16 | 4  | 59.11  | 11.61 | 4 |
| -5  | 16  | -4 | 21.44  | 9.07  | 2 |
| -6  | 16  | -4 | 12.81  | 8.91  | 2 |
| 6   | -16 | 4  | 11.28  | 7.65  | 1 |
| 6   | -16 | 4  | 25.92  | 8.65  | 4 |
| -7  | 16  | -4 | 58.08  | 13.76 | 2 |
| 7   | -16 | 4  | 66.34  | 12.47 | 1 |
| -8  | 16  | -4 | 60.82  | 13.77 | 2 |
| -9  | 16  | -4 | 271.29 | 24.30 | 2 |
| -10 | 16  | -4 | 36.72  | 11.64 | 2 |
| -11 | 16  | -4 | 10.73  | 7.94  | 2 |
| -12 | 16  | -4 | 32.39  | 12.02 | 2 |
| -13 | 16  | -4 | 8.66   | 9.43  | 2 |
| -8  | -15 | 4  | 56.59  | 15.88 | 4 |
| -8  | -15 | 4  | 42.93  | 17.09 | 1 |
| -7  | -15 | 4  | 40.75  | 12.16 | 4 |
| -7  | -15 | 4  | 24.45  | 11.73 | 1 |
| -6  | -15 | 4  | 12.68  | 8.23  | 4 |
| -6  | -15 | 4  | 24.16  | 10.86 | 1 |
| -5  | -15 | 4  | 24.14  | 9.31  | 4 |
| -5  | -15 | 4  | 37.79  | 11.99 | 1 |
| -4  | -15 | 4  | 40.87  | 10.02 | 4 |
| -4  | -15 | 4  | 50.67  | 12.28 | 1 |
| -3  | -15 | 4  | -1.38  | 7.07  | 1 |
| -3  | -15 | 4  | 9.15   | 5.86  | 4 |
| -2  | -15 | 4  | 21.25  | 7.52  | 4 |
| -2  | -15 | 4  | 9.22   | 7.64  | 1 |
| -1  | -15 | 4  | 21.79  | 8.34  | 1 |
| -1  | -15 | 4  | 9.24   | 5.64  | 4 |
| 0   | -15 | 4  | 14.78  | 7.50  | 4 |
| 0   | -15 | 4  | 19.08  | 7.74  | 1 |
| -1  | 15  | -4 | 7.69   | 6.73  | 2 |
| 1   | -15 | 4  | 9.51   | 6.51  | 1 |
| 1   | -15 | 4  | 2.22   | 6.03  | 4 |
| 2   | -15 | 4  | 92.53  | 13.47 | 1 |
| -2  | 15  | -4 | 96.53  | 15.09 | 2 |
| 2   | -15 | 4  | 79.89  | 12.57 | 4 |
| -3  | 15  | -4 | 306.91 | 23.29 | 2 |
| 3   | -15 | 4  | 305.43 | 21.00 | 4 |

|     |     |    |        |       |   |
|-----|-----|----|--------|-------|---|
| 3   | -15 | 4  | 307.77 | 21.66 | 1 |
| 4   | -15 | 4  | -4.38  | 5.16  | 4 |
| 4   | -15 | 4  | 13.45  | 7.41  | 1 |
| -4  | 15  | -4 | 11.58  | 6.57  | 2 |
| -5  | 15  | -4 | 252.73 | 21.37 | 2 |
| 5   | -15 | 4  | 249.27 | 18.76 | 4 |
| 5   | -15 | 4  | 283.10 | 19.81 | 1 |
| 6   | -15 | 4  | 11.66  | 7.24  | 4 |
| -6  | 15  | -4 | -0.19  | 5.66  | 2 |
| 6   | -15 | 4  | 12.43  | 7.69  | 1 |
| 7   | -15 | 4  | 2.30   | 6.80  | 1 |
| 7   | -15 | 4  | 7.57   | 6.55  | 4 |
| -7  | 15  | -4 | -4.81  | 6.08  | 2 |
| -8  | 15  | -4 | 99.58  | 16.10 | 2 |
| -9  | 15  | -4 | 25.66  | 9.36  | 2 |
| -10 | 15  | -4 | 26.12  | 9.71  | 2 |
| -11 | 15  | -4 | 9.09   | 7.96  | 2 |
| -12 | 15  | -4 | 56.61  | 14.50 | 2 |
| -13 | 15  | -4 | -2.58  | 7.72  | 2 |
| -14 | 15  | -4 | 2.63   | 7.89  | 2 |
| -8  | -14 | 4  | 38.71  | 10.84 | 4 |
| -8  | -14 | 4  | 18.77  | 10.97 | 1 |
| -7  | -14 | 4  | 73.09  | 15.52 | 1 |
| -7  | -14 | 4  | 73.40  | 13.72 | 4 |
| -6  | -14 | 4  | 174.28 | 19.82 | 4 |
| -6  | -14 | 4  | 225.84 | 23.39 | 1 |
| -5  | -14 | 4  | 28.24  | 8.68  | 4 |
| -5  | -14 | 4  | 11.38  | 8.70  | 1 |
| -4  | -14 | 4  | 4.52   | 5.69  | 4 |
| -4  | -14 | 4  | 0.26   | 6.26  | 1 |
| -3  | -14 | 4  | 23.75  | 8.45  | 1 |
| -3  | -14 | 4  | 12.57  | 6.29  | 4 |
| -2  | -14 | 4  | 2.52   | 5.75  | 1 |
| -2  | -14 | 4  | -3.11  | 4.53  | 4 |
| 0   | -14 | 4  | 5.99   | 5.63  | 4 |
| -1  | 14  | -4 | 77.78  | 13.20 | 2 |
| 1   | -14 | 4  | 98.19  | 13.15 | 4 |
| 1   | -14 | 4  | 88.45  | 12.90 | 1 |
| 2   | -14 | 4  | 19.31  | 7.73  | 4 |
| 2   | -14 | 4  | 20.32  | 7.85  | 1 |
| -2  | 14  | -4 | 16.70  | 8.16  | 2 |
| 3   | -14 | 4  | 49.91  | 10.40 | 4 |
| -3  | 14  | -4 | 30.83  | 9.38  | 2 |
| 3   | -14 | 4  | 37.88  | 8.94  | 1 |
| 4   | -14 | 4  | 19.43  | 7.71  | 1 |
| 4   | -14 | 4  | 22.47  | 7.15  | 4 |



|     |     |    |        |       |   |
|-----|-----|----|--------|-------|---|
| -4  | 14  | -4 | 29.77  | 9.62  | 2 |
| 5   | -14 | 4  | -3.84  | 4.02  | 4 |
| 5   | -14 | 4  | 5.90   | 5.09  | 1 |
| -5  | 14  | -4 | 2.41   | 5.94  | 2 |
| 6   | -14 | 4  | 512.17 | 26.94 | 1 |
| -6  | 14  | -4 | 577.14 | 32.45 | 2 |
| 6   | -14 | 4  | 479.43 | 26.33 | 4 |
| 7   | -14 | 4  | 75.23  | 11.00 | 4 |
| -7  | 14  | -4 | 78.38  | 14.00 | 2 |
| 7   | -14 | 4  | 49.25  | 10.15 | 1 |
| -8  | 14  | -4 | 31.96  | 9.50  | 2 |
| -9  | 14  | -4 | 20.92  | 7.98  | 2 |
| -10 | 14  | -4 | 12.62  | 7.89  | 2 |
| -11 | 14  | -4 | 39.45  | 11.28 | 2 |
| -12 | 14  | -4 | 60.67  | 14.78 | 2 |
| -13 | 14  | -4 | 15.08  | 8.42  | 2 |
| -14 | 14  | -4 | 18.68  | 10.44 | 2 |
| -8  | -13 | 4  | 6.32   | 9.81  | 1 |
| -8  | -13 | 4  | 10.26  | 8.48  | 4 |
| -7  | -13 | 4  | 73.89  | 14.72 | 1 |
| -7  | -13 | 4  | 63.10  | 12.40 | 4 |
| -6  | -13 | 4  | 2.98   | 6.83  | 1 |
| -6  | -13 | 4  | 10.70  | 6.94  | 4 |
| -5  | -13 | 4  | 169.20 | 18.18 | 4 |
| -5  | -13 | 4  | 214.77 | 18.47 | 1 |
| 3   | 13  | -4 | 141.94 | 16.90 | 1 |
| 2   | 13  | -4 | 170.96 | 17.41 | 1 |
| 1   | 13  | -4 | 1.90   | 4.87  | 1 |
| 0   | 13  | -4 | 340.10 | 23.25 | 2 |
| 0   | 13  | -4 | 352.65 | 22.39 | 1 |
| -1  | 13  | -4 | 160.49 | 15.64 | 1 |
| -1  | 13  | -4 | 141.81 | 16.49 | 2 |
| -2  | 13  | -4 | 39.42  | 9.17  | 2 |
| -3  | 13  | -4 | 135.88 | 16.20 | 2 |
| 4   | -13 | 4  | 45.23  | 8.46  | 4 |
| 4   | -13 | 4  | 62.82  | 9.89  | 1 |
| -4  | 13  | -4 | 36.28  | 9.77  | 2 |
| 5   | -13 | 4  | 1.81   | 4.18  | 1 |
| 5   | -13 | 4  | 8.86   | 4.98  | 4 |
| -5  | 13  | -4 | 3.50   | 5.55  | 2 |
| 6   | -13 | 4  | 259.48 | 16.91 | 4 |
| 6   | -13 | 4  | 267.80 | 17.20 | 1 |
| -6  | 13  | -4 | 256.60 | 20.23 | 2 |
| 7   | -13 | 4  | 15.17  | 5.93  | 4 |
| 7   | -13 | 4  | 22.59  | 6.15  | 1 |
| -7  | 13  | -4 | 14.86  | 6.93  | 2 |

-8 13 -4 45.86 11.19 2  
-9 13 -4 -1.25 4.31 2  
-10 13 -4 118.78 17.80 2  
-11 13 -4 49.51 12.57 2  
-12 13 -4 6.22 5.70 2  
-13 13 -4 229.39 25.90 2  
-14 13 -4 47.90 13.99 2  
-15 13 -4 23.73 10.70 2  
-8 -12 4 94.93 15.77 4  
-8 -12 4 121.22 18.04 1  
-7 -12 4 40.63 11.29 1  
-7 -12 4 60.62 12.46 4  
5 12 -4 35.25 9.88 1  
4 12 -4 45.71 10.56 1  
3 12 -4 135.26 15.22 1  
2 12 -4 7.09 5.63 1  
1 12 -4 0.21 4.08 1  
0 12 -4 55.60 10.27 2  
0 12 -4 48.77 9.01 1  
-1 12 -4 0.01 3.31 1  
-1 12 -4 1.82 4.30 2  
-2 12 -4 351.29 22.36 2  
-2 12 -4 367.62 21.04 1  
-3 12 -4 38.37 9.15 2  
-3 12 -4 65.88 9.50 1  
-4 12 -4 609.32 31.56 2  
-5 12 -4 1.87 3.93 2  
5 -12 4 8.90 4.58 1  
5 -12 4 -4.32 3.79 4  
6 -12 4 -2.74 3.78 4  
6 -12 4 8.83 4.49 1  
-6 12 -4 31.55 9.19 2  
-7 12 -4 481.42 29.66 2  
7 -12 4 577.04 26.04 4  
7 -12 4 559.19 25.58 1  
-8 12 -4 -2.17 3.84 2  
-9 12 -4 319.59 24.40 2  
-10 12 -4 69.37 13.35 2  
-11 12 -4 38.40 11.06 2  
-12 12 -4 7.44 6.54 2  
-13 12 -4 68.34 15.07 2  
-14 12 -4 24.34 10.36 2  
-15 12 -4 7.25 8.79 2  
7 11 -4 110.65 15.29 1  
6 11 -4 91.21 13.60 1  
5 11 -4 13.57 6.62 1

|     |     |    |        |       |   |
|-----|-----|----|--------|-------|---|
| 4   | 11  | -4 | 162.08 | 15.88 | 1 |
| 3   | 11  | -4 | 34.40  | 8.82  | 1 |
| 2   | 11  | -4 | 305.56 | 19.87 | 1 |
| 1   | 11  | -4 | 3.59   | 3.41  | 1 |
| 1   | 11  | -4 | -0.80  | 3.71  | 2 |
| 0   | 11  | -4 | 272.63 | 17.43 | 1 |
| 0   | 11  | -4 | 232.60 | 17.13 | 2 |
| -1  | 11  | -4 | 152.99 | 12.75 | 1 |
| -1  | 11  | -4 | 143.79 | 12.98 | 2 |
| -2  | 11  | -4 | 120.58 | 13.19 | 2 |
| -2  | 11  | -4 | 117.76 | 11.91 | 1 |
| -3  | 11  | -4 | 222.71 | 16.21 | 2 |
| -3  | 11  | -4 | 197.51 | 14.19 | 1 |
| -4  | 11  | -4 | 36.36  | 7.93  | 2 |
| -4  | 11  | -4 | 41.29  | 7.38  | 1 |
| -5  | 11  | -4 | 183.26 | 15.59 | 2 |
| 6   | -11 | 4  | 36.63  | 6.83  | 4 |
| 6   | -11 | 4  | 38.95  | 7.03  | 1 |
| -6  | 11  | -4 | 35.57  | 8.91  | 2 |
| -7  | 11  | -4 | 102.42 | 14.28 | 2 |
| 7   | -11 | 4  | 135.08 | 10.57 | 4 |
| 7   | -11 | 4  | 119.77 | 10.76 | 1 |
| -8  | 11  | -4 | 38.36  | 9.58  | 2 |
| -9  | 11  | -4 | -2.78  | 3.97  | 2 |
| -10 | 11  | -4 | 212.28 | 21.40 | 2 |
| -11 | 11  | -4 | 45.72  | 11.55 | 2 |
| -12 | 11  | -4 | 7.98   | 6.56  | 2 |
| -13 | 11  | -4 | 6.51   | 6.32  | 2 |
| -14 | 11  | -4 | 21.09  | 9.47  | 2 |
| -15 | 11  | -4 | 3.55   | 7.20  | 2 |
| 8   | 10  | -4 | 206.63 | 18.26 | 1 |
| 7   | 10  | -4 | 4.01   | 6.04  | 1 |
| 6   | 10  | -4 | 19.29  | 7.31  | 1 |
| 5   | 10  | -4 | -2.62  | 4.65  | 1 |
| 4   | 10  | -4 | 50.11  | 9.12  | 1 |
| 3   | 10  | -4 | 16.83  | 5.80  | 1 |
| 2   | 10  | -4 | 16.41  | 5.66  | 1 |
| 1   | 10  | -4 | 70.80  | 10.49 | 2 |
| 1   | 10  | -4 | 79.61  | 10.16 | 1 |
| 0   | 10  | -4 | -2.02  | 3.37  | 2 |
| 0   | 10  | -4 | 7.12   | 3.62  | 1 |
| -1  | 10  | -4 | 520.58 | 24.84 | 1 |
| -1  | 10  | -4 | 534.50 | 26.31 | 2 |
| -2  | 10  | -4 | 167.02 | 13.26 | 2 |
| -2  | 10  | -4 | 145.95 | 11.55 | 1 |
| -3  | 10  | -4 | 59.16  | 9.34  | 2 |

|     |     |    |        |       |   |
|-----|-----|----|--------|-------|---|
| -3  | 10  | -4 | 43.66  | 7.23  | 1 |
| -4  | 10  | -4 | 100.74 | 9.80  | 1 |
| -4  | 10  | -4 | 88.24  | 11.48 | 2 |
| -5  | 10  | -4 | 381.13 | 18.84 | 1 |
| -5  | 10  | -4 | 326.66 | 20.99 | 2 |
| 6   | -10 | 4  | 100.33 | 9.28  | 4 |
| 6   | -10 | 4  | 105.90 | 8.84  | 1 |
| -6  | 10  | -4 | 75.37  | 11.85 | 2 |
| -7  | 10  | -4 | 581.89 | 31.37 | 2 |
| -8  | 10  | -4 | 2.88   | 4.48  | 2 |
| -9  | 10  | -4 | 80.08  | 13.24 | 2 |
| -10 | 10  | -4 | 29.31  | 8.73  | 2 |
| -11 | 10  | -4 | -7.49  | 3.66  | 2 |
| -12 | 10  | -4 | 68.20  | 13.74 | 2 |
| -13 | 10  | -4 | 24.86  | 9.10  | 2 |
| -14 | 10  | -4 | 201.03 | 23.83 | 2 |
| -15 | 10  | -4 | 161.15 | 22.78 | 2 |
| -13 | -9  | 4  | -4.09  | 9.70  | 3 |
| -12 | -9  | 4  | 0.06   | 6.92  | 3 |
| -11 | -9  | 4  | 7.39   | 8.45  | 3 |
| 9   | 9   | -4 | 5.81   | 6.56  | 1 |
| 8   | 9   | -4 | 8.49   | 6.51  | 1 |
| 7   | 9   | -4 | 11.06  | 5.98  | 1 |
| 6   | 9   | -4 | 29.71  | 7.11  | 1 |
| 5   | 9   | -4 | 45.84  | 8.51  | 1 |
| 4   | 9   | -4 | 429.11 | 22.96 | 1 |
| 3   | 9   | -4 | 164.10 | 13.22 | 1 |
| 2   | 9   | -4 | 12.51  | 4.90  | 1 |
| -2  | -9  | 4  | 20.20  | 3.72  | 3 |
| 1   | 9   | -4 | 94.87  | 10.39 | 2 |
| 1   | 9   | -4 | 120.07 | 10.44 | 1 |
| 0   | 9   | -4 | -3.22  | 2.23  | 1 |
| 0   | 9   | -4 | 2.60   | 3.05  | 2 |
| -1  | 9   | -4 | 33.52  | 6.71  | 2 |
| -1  | 9   | -4 | 32.72  | 6.07  | 1 |
| -2  | 9   | -4 | 30.25  | 5.84  | 1 |
| -2  | 9   | -4 | 27.37  | 5.98  | 2 |
| -3  | 9   | -4 | 144.86 | 11.94 | 2 |
| -3  | 9   | -4 | 136.98 | 10.33 | 1 |
| -4  | 9   | -4 | 0.56   | 3.13  | 2 |
| -4  | 9   | -4 | 0.12   | 2.11  | 1 |
| -5  | 9   | -4 | 126.90 | 13.41 | 2 |
| -5  | 9   | -4 | 130.64 | 9.76  | 1 |
| -6  | 9   | -4 | 46.25  | 8.93  | 2 |
| -6  | 9   | -4 | 37.00  | 5.98  | 1 |
| -7  | 9   | -4 | 226.16 | 13.26 | 3 |

|     |    |    |         |       |   |
|-----|----|----|---------|-------|---|
| -7  | 9  | -4 | 197.71  | 16.52 | 2 |
| -8  | 9  | -4 | 1146.46 | 42.30 | 3 |
| -8  | 9  | -4 | 1114.96 | 48.45 | 2 |
| -9  | 9  | -4 | 95.16   | 11.02 | 3 |
| -9  | 9  | -4 | 75.78   | 13.09 | 2 |
| -10 | 9  | -4 | -1.06   | 3.66  | 3 |
| -10 | 9  | -4 | 6.37    | 6.16  | 2 |
| -11 | 9  | -4 | 2.09    | 4.42  | 2 |
| -11 | 9  | -4 | -5.00   | 4.54  | 3 |
| -12 | 9  | -4 | 8.32    | 6.66  | 2 |
| -13 | 9  | -4 | 14.26   | 7.75  | 2 |
| -14 | 9  | -4 | 20.57   | 8.11  | 2 |
| -15 | 9  | -4 | 5.14    | 7.32  | 2 |
| -14 | -8 | 4  | 63.54   | 16.32 | 3 |
| -13 | -8 | 4  | 101.70  | 18.20 | 3 |
| -12 | -8 | 4  | 50.87   | 13.51 | 3 |
| -11 | -8 | 4  | 26.61   | 10.04 | 3 |
| 9   | 8  | -4 | 15.48   | 6.84  | 1 |
| -9  | -8 | 4  | 42.11   | 10.02 | 2 |
| 8   | 8  | -4 | 12.10   | 5.83  | 1 |
| 7   | 8  | -4 | 133.89  | 13.02 | 1 |
| 6   | 8  | -4 | 157.30  | 13.32 | 1 |
| 5   | 8  | -4 | 328.97  | 19.06 | 1 |
| 4   | 8  | -4 | 23.37   | 6.02  | 1 |
| 3   | 8  | -4 | 35.47   | 7.08  | 1 |
| 2   | 8  | -4 | 11.31   | 4.24  | 1 |
| -2  | -8 | 4  | 7.12    | 2.62  | 3 |
| 1   | 8  | -4 | 543.99  | 24.29 | 1 |
| -1  | -8 | 4  | 524.12  | 18.42 | 3 |
| 1   | 8  | -4 | 542.87  | 24.29 | 2 |
| 0   | 8  | -4 | 658.35  | 28.05 | 1 |
| 0   | 8  | -4 | 724.49  | 29.24 | 2 |
| -1  | 8  | -4 | 1283.55 | 43.94 | 1 |
| -1  | 8  | -4 | 1215.95 | 44.91 | 2 |
| -2  | 8  | -4 | 19.07   | 4.40  | 1 |
| -2  | 8  | -4 | 17.21   | 4.63  | 2 |
| -3  | 8  | -4 | 23.63   | 2.61  | 3 |
| -3  | 8  | -4 | 22.50   | 4.60  | 1 |
| -3  | 8  | -4 | 30.28   | 6.35  | 2 |
| -4  | 8  | -4 | 219.26  | 12.38 | 1 |
| -4  | 8  | -4 | 226.95  | 10.19 | 3 |
| -4  | 8  | -4 | 214.04  | 14.85 | 2 |
| -5  | 8  | -4 | 6.81    | 3.70  | 2 |
| -5  | 8  | -4 | 3.10    | 2.45  | 1 |
| -6  | 8  | -4 | 27.17   | 4.85  | 1 |
| -6  | 8  | -4 | 27.94   | 7.18  | 2 |

|     |    |    |        |       |   |
|-----|----|----|--------|-------|---|
| -7  | 8  | -4 | 14.12  | 5.65  | 2 |
| -8  | 8  | -4 | 32.10  | 8.28  | 2 |
| -9  | 8  | -4 | 60.09  | 11.48 | 2 |
| -10 | 8  | -4 | 3.00   | 4.47  | 2 |
| -11 | 8  | -4 | 105.09 | 15.39 | 2 |
| -12 | 8  | -4 | 46.06  | 11.56 | 2 |
| -13 | 8  | -4 | 1.00   | 4.98  | 2 |
| -14 | 8  | -4 | 16.13  | 9.11  | 3 |
| -14 | 8  | -4 | 19.18  | 8.36  | 2 |
| -15 | 8  | -4 | 56.70  | 14.31 | 2 |
| -15 | 8  | -4 | 40.31  | 12.35 | 3 |
| -16 | 8  | -4 | 39.09  | 12.60 | 3 |
| -16 | 8  | -4 | 36.79  | 12.58 | 2 |
| -14 | -7 | 4  | 7.77   | 9.81  | 3 |
| -13 | -7 | 4  | 3.67   | 7.12  | 3 |
| -12 | -7 | 4  | 3.51   | 6.88  | 3 |
| -11 | -7 | 4  | 19.63  | 8.49  | 3 |
| -9  | -7 | 4  | 87.14  | 12.59 | 2 |
| 8   | 7  | -4 | 47.22  | 8.72  | 1 |
| 7   | 7  | -4 | 3.75   | 4.05  | 1 |
| 6   | 7  | -4 | 22.17  | 6.31  | 1 |
| 5   | 7  | -4 | 318.41 | 18.17 | 1 |
| 4   | 7  | -4 | 4.61   | 3.36  | 1 |
| -3  | -7 | 4  | 6.97   | 3.03  | 3 |
| 3   | 7  | -4 | 13.80  | 4.62  | 1 |
| -2  | -7 | 4  | 16.94  | 3.30  | 3 |
| 2   | 7  | -4 | 11.90  | 4.08  | 1 |
| 2   | 7  | -4 | 22.26  | 5.01  | 2 |
| -1  | -7 | 4  | 639.26 | 20.85 | 3 |
| 1   | 7  | -4 | 616.29 | 25.62 | 2 |
| 1   | 7  | -4 | 629.31 | 25.91 | 1 |
| 0   | 7  | -4 | 1.59   | 2.22  | 1 |
| 0   | 7  | -4 | 0.63   | 2.32  | 2 |
| -1  | 7  | -4 | 61.98  | 6.94  | 1 |
| -1  | 7  | -4 | 67.75  | 7.80  | 2 |
| -2  | 7  | -4 | 4.74   | 2.68  | 2 |
| -2  | 7  | -4 | 3.97   | 2.42  | 1 |
| -3  | 7  | -4 | 12.08  | 3.95  | 2 |
| -3  | 7  | -4 | 12.72  | 3.53  | 1 |
| -4  | 7  | -4 | 100.86 | 7.45  | 1 |
| -4  | 7  | -4 | 94.21  | 10.18 | 2 |
| -5  | 7  | -4 | 329.23 | 14.80 | 1 |
| -5  | 7  | -4 | 335.03 | 19.62 | 2 |
| -6  | 7  | -4 | 193.71 | 15.34 | 2 |
| -6  | 7  | -4 | 207.03 | 10.93 | 1 |
| -7  | 7  | -4 | 156.94 | 14.02 | 2 |

|     |    |    |         |       |   |
|-----|----|----|---------|-------|---|
| -8  | 7  | -4 | 21.52   | 6.78  | 2 |
| -9  | 7  | -4 | 115.72  | 14.61 | 2 |
| -10 | 7  | -4 | 121.57  | 15.35 | 2 |
| -11 | 7  | -4 | 7.80    | 5.43  | 2 |
| -12 | 7  | -4 | 32.48   | 9.45  | 2 |
| -13 | 7  | -4 | 48.51   | 11.29 | 2 |
| -14 | 7  | -4 | 5.11    | 5.95  | 2 |
| -15 | 7  | -4 | -2.54   | 5.66  | 2 |
| -15 | 7  | -4 | 1.79    | 7.12  | 3 |
| -16 | 7  | -4 | 2.06    | 7.60  | 3 |
| -16 | 7  | -4 | 11.27   | 8.83  | 2 |
| -15 | -6 | 4  | 65.03   | 17.44 | 3 |
| -14 | -6 | 4  | 184.90  | 23.07 | 3 |
| -13 | -6 | 4  | 15.93   | 9.62  | 3 |
| -12 | -6 | 4  | 15.02   | 8.15  | 3 |
| -11 | -6 | 4  | 80.29   | 13.50 | 3 |
| -10 | -6 | 4  | 116.02  | 14.27 | 2 |
| -9  | -6 | 4  | 174.15  | 14.68 | 2 |
| 9   | 6  | -4 | 169.55  | 13.55 | 1 |
| -8  | -6 | 4  | 77.81   | 10.77 | 2 |
| 7   | 6  | -4 | 1122.03 | 42.04 | 1 |
| 6   | 6  | -4 | 203.68  | 13.78 | 1 |
| 5   | 6  | -4 | 582.65  | 25.33 | 1 |
| 4   | 6  | -4 | 34.48   | 6.01  | 1 |
| -4  | -6 | 4  | 33.53   | 5.40  | 3 |
| -3  | -6 | 4  | 184.82  | 10.36 | 3 |
| 3   | 6  | -4 | 187.67  | 11.99 | 1 |
| -2  | -6 | 4  | 1070.58 | 34.14 | 3 |
| 2   | 6  | -4 | 1102.24 | 37.59 | 1 |
| 2   | 6  | -4 | 978.01  | 36.56 | 2 |
| 1   | 6  | -4 | 828.53  | 30.90 | 1 |
| -1  | -6 | 4  | 822.55  | 26.54 | 3 |
| 1   | 6  | -4 | 881.60  | 30.92 | 2 |
| 0   | 6  | -4 | 37.02   | 5.36  | 2 |
| 0   | 6  | -4 | 43.93   | 5.83  | 1 |
| -1  | 6  | -4 | 49.69   | 6.39  | 2 |
| -1  | 6  | -4 | 48.34   | 5.61  | 1 |
| -2  | 6  | -4 | 66.22   | 7.70  | 2 |
| -2  | 6  | -4 | 70.51   | 6.12  | 1 |
| -3  | 6  | -4 | 5.13    | 2.27  | 1 |
| -3  | 6  | -4 | 2.00    | 2.15  | 2 |
| -4  | 6  | -4 | 6.80    | 2.68  | 1 |
| -4  | 6  | -4 | 3.41    | 2.73  | 2 |
| -5  | 6  | -4 | 140.08  | 11.75 | 2 |
| -5  | 6  | -4 | 142.48  | 8.25  | 1 |
| -6  | 6  | -4 | 38.21   | 7.64  | 2 |

|     |    |    |        |       |   |
|-----|----|----|--------|-------|---|
| -6  | 6  | -4 | 42.05  | 4.57  | 1 |
| -7  | 6  | -4 | 16.23  | 5.87  | 2 |
| -8  | 6  | -4 | 270.71 | 19.16 | 2 |
| -9  | 6  | -4 | 9.62   | 4.61  | 2 |
| -10 | 6  | -4 | 25.65  | 7.62  | 2 |
| -11 | 6  | -4 | 150.15 | 17.30 | 2 |
| -12 | 6  | -4 | 42.48  | 10.59 | 2 |
| -13 | 6  | -4 | 77.10  | 14.73 | 2 |
| -14 | 6  | -4 | 2.07   | 5.94  | 2 |
| -15 | 6  | -4 | 24.66  | 10.32 | 2 |
| -16 | 6  | -4 | 1.61   | 7.43  | 2 |
| -16 | 6  | -4 | 9.08   | 9.24  | 3 |
| -15 | -5 | 4  | -1.07  | 8.01  | 3 |
| -14 | -5 | 4  | -3.49  | 6.58  | 3 |
| -13 | -5 | 4  | 204.15 | 22.29 | 3 |
| -12 | -5 | 4  | 9.02   | 7.01  | 3 |
| -11 | -5 | 4  | 698.10 | 36.60 | 3 |
| -10 | -5 | 4  | 82.29  | 12.78 | 3 |
| -10 | -5 | 4  | 70.51  | 10.80 | 2 |
| -9  | -5 | 4  | 30.11  | 7.27  | 2 |
| 9   | 5  | -4 | 34.65  | 7.24  | 1 |
| 8   | 5  | -4 | 80.09  | 9.20  | 1 |
| -8  | -5 | 4  | 76.95  | 9.88  | 2 |
| 7   | 5  | -4 | 40.21  | 6.55  | 1 |
| 6   | 5  | -4 | 337.80 | 17.29 | 1 |
| -5  | -5 | 4  | 27.60  | 5.60  | 3 |
| 5   | 5  | -4 | 29.60  | 5.41  | 1 |
| -4  | -5 | 4  | 320.37 | 15.66 | 3 |
| 4   | 5  | -4 | 335.92 | 16.61 | 1 |
| 3   | 5  | -4 | 13.61  | 3.72  | 1 |
| -3  | -5 | 4  | 9.96   | 3.15  | 3 |
| 2   | 5  | -4 | -0.08  | 1.25  | 2 |
| 2   | 5  | -4 | 0.69   | 1.83  | 1 |
| -2  | -5 | 4  | 0.92   | 1.64  | 3 |
| -1  | -5 | 4  | 775.42 | 24.36 | 3 |
| 1   | 5  | -4 | 740.56 | 27.76 | 1 |
| 0   | 5  | -4 | 110.91 | 7.64  | 2 |
| 0   | 5  | -4 | 131.43 | 8.38  | 1 |
| -1  | 5  | -4 | 361.32 | 16.31 | 2 |
| -1  | 5  | -4 | 354.40 | 15.42 | 1 |
| -2  | 5  | -4 | 5.38   | 2.29  | 1 |
| -2  | 5  | -4 | 0.79   | 2.04  | 2 |
| -3  | 5  | -4 | 56.70  | 5.21  | 1 |
| -3  | 5  | -4 | 58.64  | 7.40  | 2 |
| -4  | 5  | -4 | 183.59 | 12.64 | 2 |
| -4  | 5  | -4 | 193.28 | 9.50  | 1 |



-5 5 -4 1153.56 35.92 1  
-5 5 -4 1154.37 43.99 2  
-6 5 -4 -0.71 1.82 1  
-6 5 -4 1.79 3.09 2  
-7 5 -4 351.15 21.08 2  
-8 5 -4 1.03 3.31 2  
-9 5 -4 15.91 5.89 2  
-10 5 -4 49.49 10.49 2  
-11 5 -4 79.08 13.38 2  
-12 5 -4 40.99 10.34 2  
-13 5 -4 5.10 5.74 2  
-14 5 -4 19.85 7.97 2  
-15 5 -4 7.83 7.95 2  
-16 -4 4 42.21 14.83 3  
-15 -4 4 9.64 9.40 3  
-14 -4 4 0.89 6.96 3  
-13 -4 4 33.61 10.43 3  
-12 -4 4 61.33 12.36 3  
-11 -4 4 -0.86 4.51 3  
-10 -4 4 192.00 16.53 3  
-10 -4 4 193.24 14.68 2  
-9 -4 4 517.48 24.37 2  
-9 -4 4 465.75 26.06 3  
9 4 -4 472.48 22.54 1  
8 4 -4 2.18 3.21 1  
-8 -4 4 10.46 5.07 3  
-8 -4 4 5.92 3.14 2  
7 4 -4 -1.49 1.70 1  
-7 -4 4 4.25 3.81 3  
-7 -4 4 1.91 2.46 2  
-6 -4 4 61.28 7.93 3  
6 4 -4 56.71 6.92 1  
5 4 -4 705.91 27.39 1  
-5 -4 4 725.74 28.53 3  
-4 -4 4 1810.95 58.79 3  
4 4 -4 1877.45 58.47 1  
3 4 -4 37.47 5.18 1  
-3 -4 4 37.71 4.65 3  
2 4 -4 184.38 10.45 1  
-2 -4 4 182.40 8.88 3  
2 4 -4 177.70 8.98 2  
-1 -4 4 2131.81 63.19 3  
1 4 -4 2165.03 65.29 1  
0 4 -4 67.14 5.66 1  
0 4 -4 61.34 5.24 2  
-1 4 -4 501.97 19.74 2

-1 4 -4 489.55 18.73 1  
-2 4 -4 180.10 9.03 1  
-2 4 -4 164.41 10.38 2  
-3 4 -4 1097.71 38.72 2  
-3 4 -4 1036.71 33.67 1  
-4 4 -4 22.36 5.08 2  
-4 4 -4 18.49 2.91 1  
-5 4 -4 -0.84 2.36 2  
-5 4 -4 -0.62 1.43 1  
-6 4 -4 3.14 3.12 2  
-7 4 -4 131.09 12.99 2  
-8 4 -4 629.45 30.77 2  
-9 4 -4 242.33 17.92 2  
-10 4 -4 93.22 13.29 2  
-11 4 -4 139.70 17.34 2  
-12 4 -4 18.39 7.86 2  
-13 4 -4 8.20 6.56 2  
-14 4 -4 1.13 5.56 2  
-15 4 -4 47.06 12.50 2  
-16 -3 4 32.77 13.34 3  
-15 -3 4 43.72 13.74 3  
-14 -3 4 8.26 7.53 3  
-13 -3 4 247.78 21.80 3  
-12 -3 4 0.16 5.03 3  
-11 -3 4 8.09 5.82 3  
-10 -3 4 1012.66 39.89 2  
-10 -3 4 978.11 43.28 3  
-9 -3 4 44.26 8.81 3  
9 3 -4 59.36 6.98 1  
-9 -3 4 50.15 7.53 2  
8 3 -4 252.09 13.95 1  
-8 -3 4 237.10 14.16 2  
-8 -3 4 261.53 17.05 3  
-7 -3 4 26.87 6.32 3  
7 3 -4 30.83 5.25 1  
-7 -3 4 31.00 5.47 2  
-6 -3 4 1117.58 40.33 3  
-6 -3 4 1024.23 36.27 2  
5 3 -4 33.80 5.02 1  
-5 -3 4 34.79 5.71 3  
-4 -3 4 117.69 8.30 3  
4 3 -4 111.21 8.05 1  
-3 -3 4 1341.31 42.46 3  
3 3 -4 1276.23 42.35 1  
2 3 -4 116.10 5.95 2  
-2 -3 4 119.21 6.99 3

|     |    |    |         |       |   |
|-----|----|----|---------|-------|---|
| 2   | 3  | -4 | 111.77  | 7.59  | 1 |
| 1   | 3  | -4 | 1960.72 | 58.04 | 2 |
| 1   | 3  | -4 | 1917.22 | 58.77 | 1 |
| -1  | -3 | 4  | 1951.76 | 58.09 | 3 |
| -1  | 3  | -4 | 348.87  | 14.12 | 1 |
| -1  | 3  | -4 | 339.82  | 14.95 | 2 |
| -2  | 3  | -4 | 465.95  | 17.19 | 1 |
| -2  | 3  | -4 | 475.11  | 20.01 | 2 |
| -3  | 3  | -4 | 1315.99 | 44.50 | 2 |
| -3  | 3  | -4 | 1257.51 | 39.19 | 1 |
| -4  | 3  | -4 | 4.25    | 2.95  | 2 |
| -4  | 3  | -4 | 5.30    | 1.79  | 1 |
| -5  | 3  | -4 | 27.51   | 5.72  | 2 |
| -5  | 3  | -4 | 19.90   | 2.65  | 1 |
| -6  | 3  | -4 | 37.61   | 7.36  | 2 |
| -7  | 3  | -4 | 209.60  | 15.27 | 2 |
| -8  | 3  | -4 | 126.46  | 13.50 | 2 |
| -9  | 3  | -4 | 16.78   | 5.70  | 2 |
| -10 | 3  | -4 | 186.56  | 16.24 | 2 |
| -11 | 3  | -4 | 76.84   | 13.01 | 2 |
| -12 | 3  | -4 | 110.88  | 16.15 | 2 |
| -13 | 3  | -4 | -4.87   | 4.01  | 2 |
| -14 | 3  | -4 | 59.95   | 13.81 | 2 |
| -15 | 3  | -4 | 84.39   | 17.82 | 2 |
| -16 | -2 | 4  | 3.75    | 8.28  | 3 |
| -15 | -2 | 4  | 59.15   | 14.41 | 3 |
| -14 | -2 | 4  | 6.74    | 7.19  | 3 |
| -13 | -2 | 4  | 0.26    | 5.02  | 3 |
| -12 | -2 | 4  | 572.17  | 32.74 | 3 |
| -11 | -2 | 4  | 28.04   | 8.26  | 3 |
| -10 | -2 | 4  | 442.72  | 22.21 | 2 |
| -10 | -2 | 4  | 462.51  | 26.31 | 3 |
| 9   | 2  | -4 | 285.14  | 15.16 | 1 |
| -9  | -2 | 4  | 325.31  | 20.17 | 3 |
| -9  | -2 | 4  | 305.21  | 16.43 | 2 |
| -8  | -2 | 4  | 23.49   | 5.02  | 2 |
| -8  | -2 | 4  | 23.60   | 6.40  | 3 |
| 8   | 2  | -4 | 19.41   | 4.49  | 1 |
| -7  | -2 | 4  | 608.10  | 23.48 | 2 |
| 7   | 2  | -4 | 591.43  | 23.41 | 1 |
| -7  | -2 | 4  | 601.79  | 27.53 | 3 |
| -6  | -2 | 4  | 2315.63 | 73.97 | 3 |
| -6  | -2 | 4  | 2238.89 | 69.19 | 2 |
| 5   | 2  | -4 | 802.88  | 28.72 | 1 |
| -5  | -2 | 4  | 820.64  | 30.81 | 3 |
| -5  | -2 | 4  | 796.44  | 26.91 | 2 |

-4 -2 4 30.29 4.74 3  
4 2 -4 18.27 3.69 1  
-3 -2 4 471.79 18.10 3  
3 2 -4 424.41 17.71 1  
-2 -2 4 480.94 17.56 3  
2 2 -4 444.89 17.81 1  
1 2 -4 2519.87 74.11 1  
1 2 -4 2506.17 73.20 2  
-1 -2 4 2523.10 74.74 3  
0 2 -4 6.65 2.38 1  
0 2 -4 -2.51 0.81 2  
-1 2 -4 7683.53 221.48 2  
-1 2 -4 7814.94 215.62 1  
-2 2 -4 291.19 11.81 1  
-2 2 -4 275.66 13.74 2  
-3 2 -4 119.11 9.00 2  
-3 2 -4 115.69 6.58 1  
-4 2 -4 217.49 9.35 1  
-4 2 -4 217.71 13.30 2  
-5 2 -4 44.72 7.15 2  
-5 2 -4 46.29 3.87 1  
-6 2 -4 3454.46 109.39 2  
-7 2 -4 5.45 4.39 2  
-8 2 -4 436.87 24.48 2  
-9 2 -4 37.29 8.90 2  
-10 2 -4 74.06 12.49 2  
-11 2 -4 9.47 5.79 2  
-12 2 -4 29.26 9.39 2  
-13 2 -4 101.12 16.50 2  
-14 2 -4 28.23 9.95 2  
-15 2 -4 0.17 6.99 2  
-17 -1 4 22.40 12.04 3  
-16 -1 4 42.66 12.87 3  
-15 -1 4 198.39 22.93 3  
-14 -1 4 0.93 5.75 3  
-13 -1 4 49.04 11.95 3  
-12 -1 4 209.10 18.97 3  
-11 -1 4 34.43 9.09 3  
-10 -1 4 -0.55 3.99 3  
-10 -1 4 0.58 2.90 2  
-9 -1 4 209.87 16.31 3  
9 1 -4 219.54 12.27 1  
-9 -1 4 222.06 13.34 2  
8 1 -4 417.68 18.09 1  
-8 -1 4 431.31 22.78 3  
-8 -1 4 422.59 18.93 2

-7 -1 4 13.49 4.76 3  
7 1 -4 24.50 4.29 1  
-7 -1 4 23.53 4.29 2  
-6 -1 4 713.28 24.07 2  
-6 -1 4 729.56 28.75 3  
6 1 -4 611.65 24.61 1  
-5 -1 4 2673.22 82.58 3  
-5 -1 4 2633.47 77.40 2  
-4 -1 4 20.56 4.29 3  
4 1 -4 16.49 3.65 1  
3 1 -4 4117.35 119.36 1  
-3 -1 4 4217.12 122.21 3  
2 1 -4 179.08 9.33 1  
-2 -1 4 178.11 9.21 3  
1 1 -4 169.36 7.16 2  
1 1 -4 161.10 8.66 1  
-1 -1 4 167.49 9.25 3  
0 1 -4 3553.13 101.60 1  
-1 1 -4 798.41 27.79 2  
-1 1 -4 811.62 26.37 1  
-2 1 -4 886.63 28.73 1  
-2 1 -4 910.65 31.92 2  
-3 1 -4 106.40 8.35 2  
-3 1 -4 105.96 6.26 1  
-4 1 -4 695.81 22.92 1  
-4 1 -4 690.91 28.24 2  
-5 1 -4 1.89 1.84 1  
-5 1 -4 4.12 2.81 2  
-6 1 -4 3.93 2.88 2  
-7 1 -4 1157.30 46.09 2  
-8 1 -4 379.54 22.73 2  
-9 1 -4 564.24 29.96 2  
-10 1 -4 1.76 4.44 2  
-11 1 -4 7.20 6.37 2  
-12 1 -4 72.44 14.30 2  
-13 1 -4 280.54 23.87 2  
-14 1 -4 2.88 6.96 2  
-15 1 -4 -0.41 7.28 2  
-17 0 4 -5.85 7.14 3  
-16 0 4 -1.06 7.39 3  
-15 0 4 11.42 8.56 3  
-14 0 4 313.55 25.06 3  
-13 0 4 80.51 14.22 3  
-12 0 4 41.12 9.83 3  
-11 0 4 50.43 10.11 3  
-11 0 4 42.74 7.64 2

-10 0 4 5.54 4.78 3  
-10 0 4 8.26 3.71 2  
9 0 -4 100.85 7.89 1  
-9 0 4 91.57 8.73 2  
-9 0 4 98.74 11.96 3  
-8 0 4 176.77 13.56 3  
8 0 -4 198.26 10.81 1  
-8 0 4 169.39 10.59 2  
7 0 -4 -1.41 1.78 1  
-7 0 4 2.85 3.43 3  
-7 0 4 0.21 1.68 2  
6 0 -4 36.30 4.77 1  
-6 0 4 35.62 4.03 2  
-6 0 4 32.79 5.98 3  
-5 0 4 91.85 5.40 2  
-5 0 4 99.46 8.11 3  
-4 0 4 804.06 29.32 3  
4 0 -4 794.22 27.65 1  
3 0 -4 179.98 9.75 1  
-3 0 4 194.15 10.21 3  
-2 0 4 11.41 3.11 3  
2 0 -4 7.40 2.24 1  
1 0 -4 8.02 1.89 2  
1 0 -4 7.83 2.42 1  
0 0 -4 1042.71 38.29 2  
0 0 -4 1432.60 39.06 1  
-1 0 -4 6.64 2.48 1  
-1 0 -4 9.36 2.87 2  
-2 0 -4 906.80 29.77 1  
-2 0 -4 930.58 32.90 2  
-3 0 -4 1595.02 53.84 2  
-3 0 -4 1623.81 48.78 1  
-4 0 -4 601.94 20.83 1  
-4 0 -4 575.85 25.44 2  
-5 0 -4 77.36 5.82 1  
-5 0 -4 76.19 9.37 2  
-6 0 -4 3.90 3.36 2  
-7 0 -4 1008.70 42.16 2  
-8 0 -4 226.10 16.98 2  
-9 0 -4 356.92 23.27 2  
-10 0 -4 490.92 29.26 2  
-11 0 -4 68.74 13.43 2  
-12 0 -4 1.55 6.67 2  
-13 0 -4 3.08 5.49 2  
-14 0 -4 122.77 20.24 2  
-15 0 -4 40.14 12.57 2

|     |    |    |         |        |   |
|-----|----|----|---------|--------|---|
| -17 | 1  | 4  | 0.68    | 5.98   | 3 |
| -16 | 1  | 4  | -0.45   | 6.80   | 3 |
| -15 | 1  | 4  | 23.64   | 9.40   | 3 |
| -14 | 1  | 4  | 6.15    | 7.49   | 3 |
| -13 | 1  | 4  | 5.74    | 5.98   | 3 |
| -12 | 1  | 4  | 44.63   | 10.68  | 3 |
| -11 | 1  | 4  | 214.25  | 18.06  | 3 |
| -11 | 1  | 4  | 225.89  | 15.26  | 2 |
| -10 | 1  | 4  | 3.21    | 3.03   | 2 |
| -10 | 1  | 4  | 0.36    | 3.98   | 3 |
| -9  | 1  | 4  | 482.24  | 25.60  | 3 |
| -9  | 1  | 4  | 508.58  | 22.20  | 2 |
| 9   | -1 | -4 | 492.28  | 20.02  | 1 |
| -8  | 1  | 4  | 594.05  | 27.80  | 3 |
| -8  | 1  | 4  | 588.83  | 23.71  | 2 |
| 8   | -1 | -4 | 606.95  | 22.82  | 1 |
| -7  | 1  | 4  | 252.80  | 12.46  | 2 |
| 7   | -1 | -4 | 275.26  | 13.17  | 1 |
| -7  | 1  | 4  | 263.60  | 15.86  | 3 |
| 6   | -1 | -4 | 119.14  | 8.11   | 1 |
| -6  | 1  | 4  | 125.91  | 9.95   | 3 |
| -6  | 1  | 4  | 131.36  | 7.53   | 2 |
| -5  | 1  | 4  | 2479.79 | 76.89  | 3 |
| -5  | 1  | 4  | 2430.38 | 71.80  | 2 |
| -4  | 1  | 4  | 3.05    | 1.48   | 2 |
| 4   | -1 | -4 | 4.51    | 2.34   | 1 |
| -4  | 1  | 4  | 2.53    | 2.28   | 3 |
| 3   | -1 | -4 | 3453.32 | 99.39  | 1 |
| -3  | 1  | 4  | 3406.67 | 102.11 | 3 |
| 2   | -1 | -4 | 253.62  | 11.80  | 1 |
| -2  | 1  | 4  | 255.35  | 12.68  | 3 |
| 1   | -1 | -4 | 54.91   | 5.23   | 1 |
| 0   | -1 | -4 | 74.81   | 5.84   | 1 |
| -1  | -1 | -4 | 487.16  | 18.38  | 1 |
| -1  | -1 | -4 | 467.32  | 19.37  | 2 |
| -2  | -1 | -4 | 776.01  | 30.11  | 2 |
| -2  | -1 | -4 | 832.40  | 27.75  | 1 |
| -3  | -1 | -4 | 48.88   | 5.12   | 1 |
| -3  | -1 | -4 | 62.32   | 7.76   | 2 |
| -4  | -1 | -4 | 1362.36 | 42.62  | 1 |
| -4  | -1 | -4 | 1328.89 | 48.58  | 2 |
| -5  | -1 | -4 | 1660.45 | 59.23  | 2 |
| -5  | -1 | -4 | 1660.43 | 51.25  | 1 |
| -6  | -1 | -4 | 39.95   | 5.02   | 1 |
| -6  | -1 | -4 | 26.78   | 6.74   | 2 |
| -7  | -1 | -4 | 1217.24 | 49.07  | 2 |

-8 -1 -4 507.50 28.24 2  
-9 -1 -4 -0.34 3.83 2  
-10 -1 -4 180.33 19.21 2  
-11 -1 -4 40.35 10.03 2  
-12 -1 -4 79.65 15.38 2  
-13 -1 -4 0.49 5.81 2  
-14 -1 -4 151.00 22.57 2  
-17 2 4 -3.35 5.83 3  
-16 2 4 106.44 18.51 3  
-15 2 4 26.53 10.31 3  
-14 2 4 56.18 12.85 3  
-13 2 4 104.05 15.52 3  
-12 2 4 161.58 17.25 3  
-11 2 4 184.73 16.20 3  
-11 2 4 159.22 12.65 2  
-10 2 4 37.98 8.33 3  
-10 2 4 52.37 7.60 2  
-9 2 4 249.03 16.80 3  
-9 2 4 231.90 13.49 2  
9 -2 -4 216.57 11.96 1  
8 -2 -4 167.60 10.02 1  
-8 2 4 138.81 12.20 3  
-8 2 4 163.98 10.51 2  
7 -2 -4 218.66 11.51 1  
-7 2 4 207.43 11.19 2  
-7 2 4 206.37 13.84 3  
-6 2 4 300.02 12.81 2  
-6 2 4 312.21 16.07 3  
6 -2 -4 257.18 13.15 1  
-5 2 4 1520.55 50.97 3  
-5 2 4 1513.57 46.74 2  
5 -2 -4 1532.49 48.09 1  
-4 2 4 2561.62 73.74 2  
-4 2 4 2520.09 77.46 3  
4 -2 -4 2419.44 74.58 1  
-3 2 4 68.04 6.80 3  
3 -2 -4 80.96 6.61 1  
2 -2 -4 1.46 1.96 1  
-2 2 4 4.21 2.76 3  
1 -2 -4 222.63 11.37 1  
0 -2 -4 93.33 6.94 1  
-1 -2 -4 1805.10 55.72 1  
-2 -2 -4 795.04 28.08 1  
-2 -2 -4 793.53 31.16 2  
-3 -2 -4 389.73 20.05 2  
-3 -2 -4 404.95 16.96 1



|     |    |    |        |       |   |
|-----|----|----|--------|-------|---|
| -4  | -2 | -4 | 5.31   | 3.03  | 2 |
| -4  | -2 | -4 | -0.04  | 2.47  | 1 |
| -5  | -2 | -4 | 769.90 | 28.35 | 1 |
| -5  | -2 | -4 | 823.74 | 35.50 | 2 |
| -6  | -2 | -4 | 2.27   | 3.57  | 2 |
| -6  | -2 | -4 | 12.75  | 3.90  | 1 |
| -7  | -2 | -4 | 175.45 | 15.14 | 2 |
| -8  | -2 | -4 | 616.90 | 32.57 | 2 |
| -9  | -2 | -4 | 227.24 | 18.98 | 2 |
| -10 | -2 | -4 | -1.87  | 3.63  | 2 |
| -11 | -2 | -4 | 5.18   | 5.29  | 2 |
| -12 | -2 | -4 | 79.46  | 15.65 | 2 |
| -13 | -2 | -4 | 26.79  | 9.66  | 2 |
| -14 | -2 | -4 | 246.35 | 27.99 | 2 |
| -17 | 3  | 4  | -0.05  | 6.15  | 3 |
| -16 | 3  | 4  | 6.75   | 8.49  | 3 |
| -15 | 3  | 4  | -1.61  | 6.42  | 3 |
| -14 | 3  | 4  | 3.33   | 6.71  | 3 |
| -13 | 3  | 4  | 45.59  | 10.88 | 3 |
| -12 | 3  | 4  | 97.83  | 14.15 | 3 |
| -11 | 3  | 4  | 60.07  | 11.01 | 3 |
| -11 | 3  | 4  | 62.65  | 9.07  | 2 |
| -10 | 3  | 4  | 587.62 | 30.22 | 3 |
| -10 | 3  | 4  | 626.81 | 27.04 | 2 |
| 9   | -3 | -4 | 6.16   | 3.00  | 1 |
| -9  | 3  | 4  | 4.95   | 3.92  | 3 |
| -9  | 3  | 4  | 5.38   | 3.25  | 2 |
| 8   | -3 | -4 | 2.86   | 2.70  | 1 |
| -8  | 3  | 4  | 2.45   | 2.99  | 3 |
| -8  | 3  | 4  | -0.09  | 2.31  | 2 |
| 7   | -3 | -4 | 425.80 | 17.81 | 1 |
| -7  | 3  | 4  | 421.72 | 17.84 | 2 |
| -7  | 3  | 4  | 375.57 | 19.94 | 3 |
| -6  | 3  | 4  | 1.13   | 2.32  | 3 |
| 6   | -3 | -4 | -2.46  | 1.28  | 1 |
| -6  | 3  | 4  | 1.73   | 2.20  | 2 |
| -5  | 3  | 4  | 466.58 | 21.07 | 3 |
| 5   | -3 | -4 | 503.23 | 20.26 | 1 |
| -5  | 3  | 4  | 499.12 | 18.89 | 2 |
| -4  | 3  | 4  | 8.42   | 2.67  | 2 |
| -4  | 3  | 4  | 7.35   | 3.24  | 3 |
| 4   | -3 | -4 | 5.78   | 2.78  | 1 |
| -3  | 3  | 4  | 429.97 | 18.97 | 3 |
| 3   | -3 | -4 | 409.25 | 17.88 | 1 |
| 2   | -3 | -4 | 809.67 | 28.90 | 1 |
| 1   | -3 | -4 | 249.46 | 12.81 | 1 |

|     |    |    |         |       |   |
|-----|----|----|---------|-------|---|
| 0   | -3 | -4 | 321.01  | 15.03 | 1 |
| -1  | -3 | -4 | 320.24  | 15.32 | 1 |
| -2  | -3 | -4 | 6.23    | 3.22  | 1 |
| -3  | -3 | -4 | 608.61  | 24.22 | 1 |
| -4  | -3 | -4 | 210.29  | 15.01 | 2 |
| -4  | -3 | -4 | 203.14  | 12.27 | 1 |
| -5  | -3 | -4 | 134.92  | 9.86  | 1 |
| -5  | -3 | -4 | 103.42  | 12.48 | 2 |
| -6  | -3 | -4 | 33.75   | 7.78  | 2 |
| -6  | -3 | -4 | 39.04   | 6.22  | 1 |
| -7  | -3 | -4 | 104.77  | 14.14 | 2 |
| -8  | -3 | -4 | 330.32  | 23.21 | 2 |
| -9  | -3 | -4 | 40.03   | 10.10 | 2 |
| -10 | -3 | -4 | 50.43   | 11.81 | 2 |
| -11 | -3 | -4 | 1.00    | 5.86  | 2 |
| -12 | -3 | -4 | 0.48    | 5.25  | 2 |
| -13 | -3 | -4 | 16.78   | 8.40  | 2 |
| -17 | 4  | 4  | 15.75   | 8.68  | 3 |
| -16 | 4  | 4  | 24.10   | 11.00 | 3 |
| -15 | 4  | 4  | 12.58   | 9.12  | 3 |
| -14 | 4  | 4  | 1.84    | 6.44  | 3 |
| -13 | 4  | 4  | 246.13  | 20.92 | 3 |
| -12 | 4  | 4  | 75.43   | 13.05 | 3 |
| -11 | 4  | 4  | 45.56   | 9.81  | 3 |
| -11 | 4  | 4  | 65.91   | 9.12  | 2 |
| -10 | 4  | 4  | 117.79  | 10.33 | 2 |
| -10 | 4  | 4  | 100.27  | 12.25 | 3 |
| -9  | 4  | 4  | 2.12    | 3.42  | 3 |
| 9   | -4 | -4 | 7.01    | 3.10  | 1 |
| -9  | 4  | 4  | 2.04    | 3.01  | 2 |
| -8  | 4  | 4  | 770.32  | 29.61 | 2 |
| 8   | -4 | -4 | 723.34  | 27.60 | 1 |
| -8  | 4  | 4  | 735.80  | 31.75 | 3 |
| 7   | -4 | -4 | 280.62  | 14.21 | 1 |
| -7  | 4  | 4  | 255.68  | 13.80 | 2 |
| -7  | 4  | 4  | 286.86  | 16.33 | 3 |
| -6  | 4  | 4  | 873.34  | 32.90 | 3 |
| -6  | 4  | 4  | 795.03  | 29.64 | 2 |
| 5   | -4 | -4 | 2856.18 | 83.51 | 1 |
| -5  | 4  | 4  | 2689.95 | 83.29 | 2 |
| -5  | 4  | 4  | 2692.64 | 85.93 | 3 |
| -4  | 4  | 4  | 1092.68 | 39.60 | 3 |
| -4  | 4  | 4  | 1131.22 | 37.73 | 2 |
| 4   | -4 | -4 | 1105.25 | 38.08 | 1 |
| -3  | 4  | 4  | 14.46   | 4.45  | 3 |
| 3   | -4 | -4 | 19.62   | 4.42  | 1 |

|     |    |    |         |       |   |
|-----|----|----|---------|-------|---|
| 2   | -4 | -4 | -0.27   | 1.84  | 1 |
| 1   | -4 | -4 | 116.45  | 9.01  | 1 |
| 0   | -4 | -4 | 535.01  | 22.37 | 1 |
| -1  | -4 | -4 | 935.29  | 33.95 | 1 |
| -2  | -4 | -4 | 162.51  | 11.21 | 1 |
| -3  | -4 | -4 | 53.54   | 7.04  | 1 |
| -4  | -4 | -4 | 8.99    | 4.56  | 2 |
| -4  | -4 | -4 | 10.26   | 3.93  | 1 |
| -5  | -4 | -4 | 287.43  | 19.67 | 2 |
| -5  | -4 | -4 | 308.53  | 16.34 | 1 |
| -6  | -4 | -4 | 134.66  | 15.44 | 2 |
| -6  | -4 | -4 | 136.25  | 11.11 | 1 |
| -7  | -4 | -4 | 71.73   | 12.63 | 2 |
| -8  | -4 | -4 | 37.31   | 9.40  | 2 |
| -9  | -4 | -4 | 13.05   | 6.40  | 2 |
| -10 | -4 | -4 | 25.40   | 8.99  | 2 |
| -11 | -4 | -4 | -5.48   | 4.74  | 2 |
| -12 | -4 | -4 | -4.48   | 5.74  | 2 |
| -13 | -4 | -4 | 5.04    | 8.43  | 2 |
| -17 | 5  | 4  | -0.20   | 7.63  | 3 |
| -16 | 5  | 4  | 13.03   | 8.40  | 3 |
| -15 | 5  | 4  | 93.27   | 16.50 | 3 |
| -14 | 5  | 4  | 1251.41 | 56.23 | 3 |
| -13 | 5  | 4  | 1.16    | 5.18  | 3 |
| -12 | 5  | 4  | 20.35   | 7.82  | 3 |
| -12 | 5  | 4  | 22.61   | 6.46  | 2 |
| -11 | 5  | 4  | 44.35   | 8.12  | 2 |
| -11 | 5  | 4  | 42.06   | 9.86  | 3 |
| -10 | 5  | 4  | 126.96  | 11.26 | 2 |
| -10 | 5  | 4  | 122.80  | 13.14 | 3 |
| -9  | 5  | 4  | 285.84  | 16.44 | 2 |
| 9   | -5 | -4 | 286.94  | 14.84 | 1 |
| -9  | 5  | 4  | 287.94  | 18.29 | 3 |
| 8   | -5 | -4 | 372.90  | 17.52 | 1 |
| -8  | 5  | 4  | 324.19  | 19.21 | 3 |
| -8  | 5  | 4  | 363.20  | 18.02 | 2 |
| -7  | 5  | 4  | 46.37   | 7.39  | 3 |
| -7  | 5  | 4  | 55.43   | 6.84  | 2 |
| 6   | -5 | -4 | 333.88  | 16.51 | 1 |
| -6  | 5  | 4  | 314.05  | 17.05 | 3 |
| -6  | 5  | 4  | 308.85  | 15.71 | 2 |
| -5  | 5  | 4  | 20.05   | 5.06  | 3 |
| -5  | 5  | 4  | 17.56   | 4.30  | 2 |
| 5   | -5 | -4 | 20.64   | 4.87  | 1 |
| -4  | 5  | 4  | 504.76  | 21.98 | 3 |
| -4  | 5  | 4  | 427.91  | 19.74 | 2 |

|     |    |    |        |       |   |
|-----|----|----|--------|-------|---|
| 4   | -5 | -4 | 444.50 | 20.09 | 1 |
| 3   | -5 | -4 | 36.87  | 6.04  | 1 |
| 2   | -5 | -4 | 6.84   | 3.07  | 1 |
| 1   | -5 | -4 | 111.89 | 9.11  | 1 |
| 0   | -5 | -4 | 10.41  | 3.60  | 1 |
| -1  | -5 | -4 | 451.61 | 20.82 | 1 |
| -2  | -5 | -4 | 4.19   | 3.59  | 1 |
| -3  | -5 | -4 | 22.94  | 5.76  | 1 |
| -4  | -5 | -4 | 706.91 | 29.24 | 1 |
| -5  | -5 | -4 | 411.19 | 24.83 | 2 |
| -5  | -5 | -4 | 401.97 | 20.57 | 1 |
| -6  | -5 | -4 | 20.04  | 6.19  | 1 |
| -6  | -5 | -4 | 13.38  | 5.04  | 2 |
| -7  | -5 | -4 | 78.69  | 13.58 | 2 |
| -8  | -5 | -4 | -1.41  | 4.84  | 2 |
| -9  | -5 | -4 | 14.94  | 7.41  | 2 |
| -10 | -5 | -4 | 10.87  | 7.62  | 2 |
| -11 | -5 | -4 | 13.97  | 7.96  | 2 |
| -12 | -5 | -4 | 105.95 | 19.39 | 2 |
| -13 | -5 | -4 | 90.53  | 18.74 | 2 |
| -17 | 6  | 4  | 24.14  | 11.20 | 3 |
| -16 | 6  | 4  | 0.89   | 7.15  | 3 |
| -15 | 6  | 4  | 35.26  | 11.31 | 3 |
| -14 | 6  | 4  | 83.09  | 15.15 | 3 |
| -13 | 6  | 4  | 188.88 | 19.17 | 3 |
| -12 | 6  | 4  | 14.94  | 7.28  | 3 |
| -12 | 6  | 4  | 7.92   | 5.04  | 2 |
| -11 | 6  | 4  | 4.34   | 4.33  | 2 |
| -11 | 6  | 4  | 4.22   | 5.19  | 3 |
| -10 | 6  | 4  | 130.59 | 13.65 | 3 |
| -10 | 6  | 4  | 112.78 | 11.79 | 2 |
| 9   | -6 | -4 | 43.94  | 6.33  | 1 |
| -9  | 6  | 4  | 40.15  | 7.27  | 2 |
| -9  | 6  | 4  | 31.11  | 7.05  | 3 |
| -8  | 6  | 4  | 177.54 | 13.65 | 3 |
| 8   | -6 | -4 | 194.83 | 12.26 | 1 |
| -8  | 6  | 4  | 187.21 | 12.75 | 2 |
| -7  | 6  | 4  | 550.94 | 25.72 | 3 |
| -7  | 6  | 4  | 577.29 | 24.87 | 2 |
| 6   | -6 | -4 | 38.85  | 6.32  | 1 |
| -6  | 6  | 4  | 40.25  | 6.91  | 3 |
| -6  | 6  | 4  | 32.23  | 6.08  | 2 |
| 5   | -6 | -4 | 53.21  | 7.28  | 1 |
| -5  | 6  | 4  | 62.55  | 8.01  | 3 |
| -5  | 6  | 4  | 75.89  | 8.23  | 2 |
| 4   | -6 | -4 | -2.01  | 2.44  | 1 |

|     |    |    |         |       |   |
|-----|----|----|---------|-------|---|
| -4  | 6  | 4  | -1.23   | 3.42  | 3 |
| -4  | 6  | 4  | 0.29    | 2.61  | 2 |
| 3   | -6 | -4 | 216.71  | 13.45 | 1 |
| 2   | -6 | -4 | 620.03  | 26.26 | 1 |
| 1   | -6 | -4 | 175.92  | 12.24 | 1 |
| 0   | -6 | -4 | 49.81   | 7.76  | 1 |
| -1  | -6 | -4 | 123.19  | 11.37 | 1 |
| -2  | -6 | -4 | 37.20   | 6.88  | 1 |
| -3  | -6 | -4 | 139.81  | 12.25 | 1 |
| -4  | -6 | -4 | 146.02  | 12.73 | 1 |
| -5  | -6 | -4 | 302.88  | 18.37 | 1 |
| -6  | -6 | -4 | 33.68   | 8.45  | 2 |
| -6  | -6 | -4 | 47.33   | 8.57  | 1 |
| -7  | -6 | -4 | 29.99   | 8.67  | 2 |
| -8  | -6 | -4 | 22.10   | 7.84  | 2 |
| -9  | -6 | -4 | 2.85    | 5.30  | 2 |
| -10 | -6 | -4 | 24.62   | 9.51  | 2 |
| -11 | -6 | -4 | 5.93    | 6.44  | 2 |
| -12 | -6 | -4 | 17.34   | 9.79  | 2 |
| -17 | 7  | 4  | 48.22   | 13.15 | 3 |
| -16 | 7  | 4  | 168.99  | 21.00 | 3 |
| -15 | 7  | 4  | 8.58    | 8.10  | 3 |
| -14 | 7  | 4  | 21.35   | 8.87  | 3 |
| -13 | 7  | 4  | 158.40  | 17.68 | 3 |
| -12 | 7  | 4  | 30.87   | 9.03  | 3 |
| -12 | 7  | 4  | 20.89   | 6.92  | 2 |
| -11 | 7  | 4  | 20.54   | 7.18  | 3 |
| -11 | 7  | 4  | 15.30   | 5.76  | 2 |
| -10 | 7  | 4  | 4.53    | 4.46  | 2 |
| -10 | 7  | 4  | 15.98   | 5.85  | 3 |
| 9   | -7 | -4 | 12.00   | 4.38  | 1 |
| -9  | 7  | 4  | 2.16    | 3.69  | 2 |
| -9  | 7  | 4  | 3.36    | 4.40  | 3 |
| -8  | 7  | 4  | 300.74  | 17.51 | 2 |
| -8  | 7  | 4  | 295.73  | 18.09 | 3 |
| -7  | 7  | 4  | 43.33   | 7.73  | 3 |
| -7  | 7  | 4  | 43.55   | 7.50  | 2 |
| 7   | -7 | -4 | 54.97   | 7.42  | 1 |
| -6  | 7  | 4  | 371.73  | 19.56 | 2 |
| 6   | -7 | -4 | 373.55  | 18.95 | 1 |
| -6  | 7  | 4  | 364.46  | 19.89 | 3 |
| -5  | 7  | 4  | 568.77  | 25.94 | 3 |
| -5  | 7  | 4  | 539.77  | 25.18 | 2 |
| 5   | -7 | -4 | 581.35  | 25.40 | 1 |
| -4  | 7  | 4  | 1082.73 | 41.37 | 2 |
| 4   | -7 | -4 | 1103.07 | 40.56 | 1 |

|     |    |    |        |       |   |
|-----|----|----|--------|-------|---|
| 3   | -7 | -4 | 26.96  | 6.03  | 1 |
| 2   | -7 | -4 | 1.80   | 2.97  | 1 |
| 1   | -7 | -4 | 508.50 | 24.32 | 1 |
| 0   | -7 | -4 | 2.25   | 3.75  | 1 |
| -1  | -7 | -4 | 42.25  | 7.81  | 1 |
| -2  | -7 | -4 | 38.44  | 8.11  | 1 |
| -3  | -7 | -4 | 12.23  | 5.49  | 1 |
| -4  | -7 | -4 | 16.23  | 6.61  | 1 |
| -5  | -7 | -4 | 34.73  | 7.78  | 1 |
| -6  | -7 | -4 | 31.39  | 7.57  | 1 |
| -6  | -7 | -4 | 38.10  | 9.60  | 2 |
| -7  | -7 | -4 | 1.64   | 4.71  | 2 |
| -8  | -7 | -4 | 76.96  | 14.84 | 2 |
| -9  | -7 | -4 | 113.84 | 19.09 | 2 |
| -10 | -7 | -4 | 33.88  | 10.21 | 2 |
| -11 | -7 | -4 | 51.08  | 13.62 | 2 |
| -17 | 8  | 4  | 44.37  | 12.98 | 3 |
| -16 | 8  | 4  | 16.12  | 9.94  | 3 |
| -15 | 8  | 4  | 98.31  | 16.87 | 3 |
| -14 | 8  | 4  | 57.92  | 13.07 | 3 |
| -13 | 8  | 4  | 109.43 | 15.32 | 3 |
| -12 | 8  | 4  | 6.87   | 6.53  | 3 |
| -12 | 8  | 4  | -0.67  | 3.03  | 2 |
| -11 | 8  | 4  | 162.23 | 16.22 | 3 |
| -11 | 8  | 4  | 179.25 | 15.10 | 2 |
| -10 | 8  | 4  | 524.14 | 26.66 | 2 |
| -10 | 8  | 4  | 530.17 | 27.64 | 3 |
| -9  | 8  | 4  | 4.22   | 5.03  | 2 |
| -9  | 8  | 4  | 19.86  | 6.42  | 3 |
| 9   | -8 | -4 | 10.44  | 4.58  | 1 |
| -8  | 8  | 4  | 11.83  | 4.77  | 2 |
| -8  | 8  | 4  | 10.26  | 5.46  | 3 |
| 8   | -8 | -4 | 12.32  | 4.63  | 1 |
| -7  | 8  | 4  | 0.93   | 4.05  | 3 |
| 7   | -8 | -4 | 2.24   | 3.83  | 1 |
| -7  | 8  | 4  | -2.80  | 2.93  | 2 |
| 6   | -8 | -4 | 8.82   | 4.86  | 1 |
| -6  | 8  | 4  | 0.20   | 3.32  | 2 |
| -6  | 8  | 4  | 5.66   | 4.63  | 3 |
| -5  | 8  | 4  | 745.77 | 32.21 | 2 |
| 5   | -8 | -4 | 721.51 | 30.97 | 1 |
| -5  | 8  | 4  | 722.52 | 31.62 | 3 |
| 4   | -8 | -4 | 153.62 | 12.34 | 1 |
| -4  | 8  | 4  | 134.08 | 12.09 | 2 |
| 3   | -8 | -4 | 139.06 | 11.89 | 1 |
| 2   | -8 | -4 | 291.63 | 17.94 | 1 |

|     |    |    |         |       |   |
|-----|----|----|---------|-------|---|
| 1   | -8 | -4 | 390.50  | 21.43 | 1 |
| 0   | -8 | -4 | 22.81   | 6.51  | 1 |
| -1  | -8 | -4 | 4.97    | 4.76  | 1 |
| -2  | -8 | -4 | 960.17  | 39.75 | 1 |
| -3  | -8 | -4 | 1412.28 | 52.77 | 1 |
| -4  | -8 | -4 | 14.39   | 6.13  | 1 |
| -5  | -8 | -4 | 24.66   | 7.29  | 1 |
| -6  | -8 | -4 | 146.84  | 19.55 | 2 |
| -6  | -8 | -4 | 126.32  | 13.82 | 1 |
| -7  | -8 | -4 | -11.84  | 3.97  | 2 |
| -8  | -8 | -4 | 81.37   | 16.07 | 2 |
| -9  | -8 | -4 | 8.90    | 7.20  | 2 |
| -10 | -8 | -4 | 55.35   | 15.00 | 2 |
| -11 | -8 | -4 | 12.88   | 10.56 | 2 |
| -17 | 9  | 4  | 4.20    | 7.81  | 3 |
| -16 | 9  | 4  | 101.83  | 17.64 | 3 |
| -15 | 9  | 4  | 60.81   | 14.37 | 3 |
| -14 | 9  | 4  | 85.83   | 14.89 | 3 |
| -13 | 9  | 4  | 3.54    | 6.67  | 3 |
| -12 | 9  | 4  | 103.62  | 14.34 | 3 |
| -12 | 9  | 4  | 103.42  | 13.22 | 2 |
| -11 | 9  | 4  | 59.39   | 10.17 | 2 |
| -11 | 9  | 4  | 38.39   | 9.06  | 3 |
| -10 | 9  | 4  | 42.26   | 8.43  | 2 |
| -10 | 9  | 4  | 61.20   | 10.49 | 3 |
| -9  | 9  | 4  | 198.42  | 15.52 | 2 |
| -9  | 9  | 4  | 181.59  | 15.28 | 3 |
| -8  | 9  | 4  | 267.74  | 18.45 | 2 |
| -8  | 9  | 4  | 319.28  | 19.41 | 3 |
| 8   | -9 | -4 | 326.63  | 18.41 | 1 |
| 7   | -9 | -4 | 248.69  | 16.15 | 1 |
| -7  | 9  | 4  | 249.42  | 17.24 | 3 |
| -7  | 9  | 4  | 257.47  | 17.35 | 2 |
| -6  | 9  | 4  | 1376.63 | 51.62 | 2 |
| 6   | -9 | -4 | 1307.64 | 48.94 | 1 |
| -5  | 9  | 4  | 9.64    | 5.20  | 2 |
| 5   | -9 | -4 | 6.33    | 4.47  | 1 |
| 4   | -9 | -4 | 102.31  | 11.36 | 1 |
| 3   | -9 | -4 | 1533.36 | 55.43 | 1 |
| 2   | -9 | -4 | 15.19   | 5.73  | 1 |
| 1   | -9 | -4 | 220.47  | 16.18 | 1 |
| 0   | -9 | -4 | 61.16   | 10.35 | 1 |
| -1  | -9 | -4 | 68.72   | 10.55 | 1 |
| -2  | -9 | -4 | 1.96    | 4.54  | 1 |
| -3  | -9 | -4 | 23.47   | 7.34  | 1 |
| -4  | -9 | -4 | 134.31  | 14.62 | 1 |

|     |     |    |        |       |   |
|-----|-----|----|--------|-------|---|
| -5  | -9  | -4 | 70.94  | 11.82 | 1 |
| -6  | -9  | -4 | 165.15 | 16.54 | 1 |
| -7  | -9  | -4 | 11.07  | 8.28  | 2 |
| -8  | -9  | -4 | -0.69  | 5.87  | 2 |
| -9  | -9  | -4 | 37.91  | 13.52 | 2 |
| -10 | -9  | -4 | 177.87 | 27.22 | 2 |
| -17 | 10  | 4  | 56.01  | 14.56 | 3 |
| -16 | 10  | 4  | 16.81  | 10.62 | 3 |
| -15 | 10  | 4  | 45.61  | 13.20 | 3 |
| -14 | 10  | 4  | -2.14  | 7.01  | 3 |
| -13 | 10  | 4  | 357.35 | 25.28 | 3 |
| -12 | 10  | 4  | 737.91 | 36.65 | 3 |
| -12 | 10  | 4  | 677.79 | 34.73 | 2 |
| -11 | 10  | 4  | -0.19  | 4.45  | 2 |
| -11 | 10  | 4  | 3.12   | 5.82  | 3 |
| 10  | -10 | -4 | 26.13  | 6.98  | 1 |
| -10 | 10  | 4  | 39.97  | 9.32  | 2 |
| -10 | 10  | 4  | 23.17  | 7.79  | 3 |
| 9   | -10 | -4 | 108.70 | 11.42 | 1 |
| -9  | 10  | 4  | 107.46 | 13.22 | 2 |
| -9  | 10  | 4  | 103.81 | 12.57 | 3 |
| -8  | 10  | 4  | 34.56  | 8.24  | 2 |
| 8   | -10 | -4 | 37.45  | 7.66  | 1 |
| 7   | -10 | -4 | 291.73 | 18.13 | 1 |
| -7  | 10  | 4  | 267.52 | 18.64 | 2 |
| 6   | -10 | -4 | 28.19  | 7.12  | 1 |
| -6  | 10  | 4  | 33.67  | 8.69  | 2 |
| -5  | 10  | 4  | 914.10 | 40.84 | 2 |
| 5   | -10 | -4 | 954.40 | 39.07 | 1 |
| 4   | -10 | -4 | 35.76  | 8.48  | 1 |
| 3   | -10 | -4 | 237.72 | 17.51 | 1 |
| 2   | -10 | -4 | 56.19  | 10.10 | 1 |
| 1   | -10 | -4 | 32.27  | 8.08  | 1 |
| 0   | -10 | -4 | 89.10  | 12.48 | 1 |
| -1  | -10 | -4 | 163.27 | 16.14 | 1 |
| -2  | -10 | -4 | 8.84   | 6.01  | 1 |
| -3  | -10 | -4 | 7.11   | 5.70  | 1 |
| -4  | -10 | -4 | 32.73  | 8.78  | 1 |
| -5  | -10 | -4 | -0.62  | 5.51  | 1 |
| -7  | -10 | -4 | 41.99  | 12.67 | 2 |
| -8  | -10 | -4 | 44.32  | 14.04 | 2 |
| -9  | -10 | -4 | 9.90   | 11.09 | 2 |
| -14 | 11  | 4  | 107.40 | 16.43 | 3 |
| -13 | 11  | 4  | 10.44  | 6.77  | 2 |
| -13 | 11  | 4  | -2.28  | 5.78  | 3 |
| -12 | 11  | 4  | 11.21  | 7.96  | 3 |



|     |     |    |        |       |   |
|-----|-----|----|--------|-------|---|
| -12 | 11  | 4  | 3.12   | 5.68  | 2 |
| -11 | 11  | 4  | 115.58 | 14.67 | 3 |
| -11 | 11  | 4  | 118.11 | 14.73 | 2 |
| 10  | -11 | -4 | -3.39  | 3.39  | 1 |
| -10 | 11  | 4  | -4.05  | 4.39  | 2 |
| -10 | 11  | 4  | 2.66   | 4.38  | 3 |
| -9  | 11  | 4  | 66.26  | 11.52 | 2 |
| 9   | -11 | -4 | 61.26  | 10.27 | 1 |
| -8  | 11  | 4  | 240.80 | 18.35 | 3 |
| -8  | 11  | 4  | 250.01 | 18.62 | 2 |
| 8   | -11 | -4 | 248.51 | 17.47 | 1 |
| 7   | -11 | -4 | 18.01  | 6.75  | 1 |
| -7  | 11  | 4  | 31.64  | 8.87  | 2 |
| -7  | 11  | 4  | 18.81  | 7.75  | 3 |
| -6  | 11  | 4  | 157.61 | 15.91 | 2 |
| 6   | -11 | -4 | 125.41 | 13.86 | 1 |
| 5   | -11 | -4 | 145.17 | 14.90 | 1 |
| -5  | 11  | 4  | 159.19 | 16.46 | 2 |
| 4   | -11 | -4 | 11.63  | 6.46  | 1 |
| 3   | -11 | -4 | 8.38   | 6.10  | 1 |
| 2   | -11 | -4 | 6.55   | 5.16  | 1 |
| 1   | -11 | -4 | 48.16  | 10.24 | 1 |
| 0   | -11 | -4 | 6.58   | 5.93  | 1 |
| -1  | -11 | -4 | 215.01 | 17.75 | 1 |
| -2  | -11 | -4 | 48.90  | 10.55 | 1 |
| -3  | -11 | -4 | 95.43  | 14.26 | 1 |
| -4  | -11 | -4 | 129.69 | 15.99 | 1 |
| -5  | -11 | -4 | -0.47  | 5.92  | 1 |
| -7  | -11 | -4 | 159.07 | 25.60 | 2 |
| -8  | -11 | -4 | -3.67  | 9.12  | 2 |
| -9  | -11 | -4 | 16.41  | 11.56 | 2 |
| -13 | 12  | 4  | 0.70   | 5.97  | 2 |
| -12 | 12  | 4  | 2.96   | 5.63  | 2 |
| -11 | 12  | 4  | 35.74  | 9.56  | 2 |
| -10 | 12  | 4  | 3.50   | 5.79  | 2 |
| 10  | -12 | -4 | 6.95   | 5.59  | 1 |
| 9   | -12 | -4 | 14.46  | 6.85  | 1 |
| -9  | 12  | 4  | 12.12  | 6.63  | 2 |
| 8   | -12 | -4 | 67.25  | 11.51 | 1 |
| -8  | 12  | 4  | 78.98  | 12.96 | 2 |
| -7  | 12  | 4  | 250.18 | 19.73 | 2 |
| 7   | -12 | -4 | 262.21 | 19.50 | 1 |
| 6   | -12 | -4 | 172.43 | 16.63 | 1 |
| -6  | 12  | 4  | 145.75 | 16.91 | 2 |
| 5   | -12 | -4 | 2.64   | 5.95  | 1 |
| 4   | -12 | -4 | -0.17  | 5.97  | 1 |

|     |     |    |        |       |   |
|-----|-----|----|--------|-------|---|
| 3   | -12 | -4 | 203.41 | 19.09 | 1 |
| 2   | -12 | -4 | 194.75 | 17.14 | 1 |
| 1   | -12 | -4 | 8.12   | 6.08  | 1 |
| 0   | -12 | -4 | 30.10  | 8.94  | 1 |
| -1  | -12 | -4 | 194.96 | 19.32 | 1 |
| -2  | -12 | -4 | 21.08  | 8.01  | 1 |
| -3  | -12 | -4 | 177.52 | 18.96 | 1 |
| -4  | -12 | -4 | -4.58  | 6.42  | 1 |
| -5  | -12 | -4 | 14.54  | 8.58  | 1 |
| -7  | -12 | -4 | 94.98  | 20.97 | 2 |
| -8  | -12 | -4 | 54.26  | 16.65 | 2 |
| -13 | 13  | 4  | 154.95 | 19.22 | 2 |
| -12 | 13  | 4  | 4.78   | 6.49  | 2 |
| -11 | 13  | 4  | 165.50 | 18.77 | 2 |
| -10 | 13  | 4  | 31.01  | 8.93  | 2 |
| 10  | -13 | -4 | 23.44  | 8.48  | 1 |
| 9   | -13 | -4 | 86.41  | 12.86 | 1 |
| -9  | 13  | 4  | 109.37 | 15.43 | 2 |
| -8  | 13  | 4  | 373.28 | 25.25 | 2 |
| 8   | -13 | -4 | 292.47 | 21.37 | 1 |
| 7   | -13 | -4 | 1.17   | 6.29  | 1 |
| -7  | 13  | 4  | 3.15   | 5.73  | 2 |
| 6   | -13 | -4 | 133.48 | 15.86 | 1 |
| -6  | 13  | 4  | 128.22 | 16.97 | 2 |
| 5   | -13 | -4 | 197.91 | 18.73 | 1 |
| 4   | -13 | -4 | 9.58   | 7.77  | 1 |
| 3   | -13 | -4 | 18.05  | 8.60  | 1 |
| 2   | -13 | -4 | 28.64  | 9.17  | 1 |
| 1   | -13 | -4 | 240.22 | 19.93 | 1 |
| 0   | -13 | -4 | 8.83   | 6.72  | 1 |
| -1  | -13 | -4 | 164.97 | 19.11 | 1 |
| -2  | -13 | -4 | 88.27  | 15.11 | 1 |
| -3  | -13 | -4 | 19.58  | 9.07  | 1 |
| -4  | -13 | -4 | 52.34  | 12.16 | 1 |
| -5  | -13 | -4 | 237.10 | 22.92 | 1 |
| -7  | -13 | -4 | -10.11 | 10.70 | 2 |
| -13 | 14  | 4  | 7.66   | 7.20  | 2 |
| -12 | 14  | 4  | -3.72  | 5.75  | 2 |
| -11 | 14  | 4  | 0.94   | 6.37  | 2 |
| -10 | 14  | 4  | 34.88  | 10.61 | 2 |
| 10  | -14 | -4 | 45.83  | 10.68 | 1 |
| 9   | -14 | -4 | 61.56  | 11.64 | 1 |
| -9  | 14  | 4  | 61.17  | 13.03 | 2 |
| 8   | -14 | -4 | 3.02   | 6.76  | 1 |
| -8  | 14  | 4  | 14.44  | 7.35  | 2 |
| 7   | -14 | -4 | 6.86   | 7.13  | 1 |

|     |     |    |        |       |   |
|-----|-----|----|--------|-------|---|
| -7  | 14  | 4  | 8.84   | 6.90  | 2 |
| 6   | -14 | -4 | 46.56  | 11.71 | 1 |
| 5   | -14 | -4 | 447.71 | 28.15 | 1 |
| 4   | -14 | -4 | 221.25 | 21.23 | 1 |
| 3   | -14 | -4 | 48.14  | 13.09 | 1 |
| 2   | -14 | -4 | -1.34  | 6.45  | 1 |
| 1   | -14 | -4 | 98.51  | 16.23 | 1 |
| 0   | -14 | -4 | -11.12 | 5.96  | 1 |
| -1  | -14 | -4 | 36.40  | 10.83 | 1 |
| -2  | -14 | -4 | 195.44 | 21.25 | 1 |
| -3  | -14 | -4 | 89.99  | 15.85 | 1 |
| -4  | -14 | -4 | -7.00  | 7.75  | 1 |
| -5  | -14 | -4 | 21.62  | 10.72 | 1 |
| -13 | 15  | 4  | 51.40  | 12.69 | 2 |
| -12 | 15  | 4  | 29.32  | 9.82  | 2 |
| -11 | 15  | 4  | 4.67   | 7.57  | 2 |
| 10  | -15 | -4 | 27.38  | 9.50  | 1 |
| -10 | 15  | 4  | 13.98  | 8.44  | 2 |
| 9   | -15 | -4 | 54.14  | 12.57 | 1 |
| -9  | 15  | 4  | 28.95  | 10.44 | 2 |
| 8   | -15 | -4 | -5.50  | 7.63  | 1 |
| -8  | 15  | 4  | 11.78  | 7.98  | 2 |
| 7   | -15 | -4 | 198.77 | 20.30 | 1 |
| 6   | -15 | -4 | 38.80  | 11.79 | 1 |
| 5   | -15 | -4 | 31.16  | 11.05 | 1 |
| 4   | -15 | -4 | 11.99  | 9.23  | 1 |
| 3   | -15 | -4 | 56.68  | 14.18 | 1 |
| 2   | -15 | -4 | 13.89  | 7.93  | 1 |
| 1   | -15 | -4 | -4.11  | 6.67  | 1 |
| 0   | -15 | -4 | 24.16  | 9.51  | 1 |
| -1  | -15 | -4 | 93.03  | 16.19 | 1 |
| -2  | -15 | -4 | 52.29  | 13.81 | 1 |
| -3  | -15 | -4 | 19.34  | 11.09 | 1 |
| -4  | -15 | -4 | 2.09   | 9.62  | 1 |
| -13 | 16  | 4  | 0.95   | 7.32  | 2 |
| -12 | 16  | 4  | 30.70  | 11.43 | 2 |
| -11 | 16  | 4  | 13.43  | 8.94  | 2 |
| 10  | -16 | -4 | 45.32  | 12.00 | 1 |
| -10 | 16  | 4  | 25.89  | 9.69  | 2 |
| 9   | -16 | -4 | -2.31  | 7.53  | 1 |
| -9  | 16  | 4  | 0.39   | 6.76  | 2 |
| 8   | -16 | -4 | 26.66  | 10.62 | 1 |
| -8  | 16  | 4  | 21.30  | 9.04  | 2 |
| 7   | -16 | -4 | 62.60  | 13.83 | 1 |
| 6   | -16 | -4 | 16.43  | 10.02 | 1 |
| 5   | -16 | -4 | 6.76   | 9.14  | 1 |

|     |     |    |       |       |   |
|-----|-----|----|-------|-------|---|
| 4   | -16 | -4 | 20.68 | 10.21 | 1 |
| 3   | -16 | -4 | 3.86  | 8.25  | 1 |
| 2   | -16 | -4 | -7.26 | 6.55  | 1 |
| 1   | -16 | -4 | 1.82  | 8.71  | 1 |
| 0   | -16 | -4 | 42.33 | 13.15 | 1 |
| -1  | -16 | -4 | 2.65  | 8.98  | 1 |
| -2  | -16 | -4 | 8.24  | 9.55  | 1 |
| -3  | -16 | -4 | 6.47  | 10.04 | 1 |
| -12 | 17  | 4  | 11.59 | 9.87  | 2 |
| -11 | 17  | 4  | 5.18  | 8.40  | 2 |
| -10 | 17  | 4  | 14.26 | 9.94  | 2 |
| 9   | -17 | -4 | 6.54  | 9.03  | 1 |
| -9  | 17  | 4  | -9.57 | 5.49  | 2 |
| 8   | -17 | -4 | 36.55 | 12.14 | 1 |
| 7   | -17 | -4 | 38.71 | 12.32 | 1 |
| 6   | -17 | -4 | 8.80  | 9.57  | 1 |
| 5   | -17 | -4 | 36.60 | 12.99 | 1 |
| 4   | -17 | -4 | 2.24  | 8.81  | 1 |
| 3   | -17 | -4 | 7.81  | 8.73  | 1 |
| 2   | -17 | -4 | 6.95  | 9.01  | 1 |
| 1   | -17 | -4 | 48.54 | 14.68 | 1 |
| 0   | -17 | -4 | 10.14 | 10.12 | 1 |
| -1  | -17 | -4 | 6.00  | 10.49 | 1 |
| -11 | 18  | 4  | 3.36  | 9.96  | 2 |
| -10 | 18  | 4  | 3.29  | 9.78  | 2 |
| 9   | -18 | -4 | 15.01 | 11.00 | 1 |
| 8   | -18 | -4 | 23.16 | 11.79 | 1 |
| 7   | -18 | -4 | 13.49 | 10.57 | 1 |
| 6   | -18 | -4 | 9.94  | 8.91  | 1 |
| 5   | -18 | -4 | 12.64 | 10.27 | 1 |
| 4   | -18 | -4 | 3.94  | 8.48  | 1 |
| 3   | -18 | -4 | 5.53  | 8.66  | 1 |
| 2   | -18 | -4 | 4.23  | 9.50  | 1 |
| 1   | -18 | -4 | 27.82 | 12.68 | 1 |
| 8   | -19 | -4 | 4.74  | 10.24 | 1 |
| 7   | -19 | -4 | 11.33 | 11.97 | 1 |
| 6   | -19 | -4 | 4.64  | 7.75  | 1 |
| 5   | -19 | -4 | 7.76  | 9.43  | 1 |
| 0   | -20 | 5  | 12.62 | 8.53  | 1 |
| 0   | -20 | 5  | 7.13  | 8.02  | 4 |
| 1   | -20 | 5  | -0.40 | 6.86  | 4 |
| 1   | -20 | 5  | 1.84  | 6.71  | 1 |
| 2   | -20 | 5  | 14.82 | 7.93  | 4 |
| 2   | -20 | 5  | 2.92  | 7.24  | 1 |
| 3   | -20 | 5  | 15.52 | 9.45  | 1 |
| 3   | -20 | 5  | 16.51 | 8.99  | 4 |

|    |     |    |        |       |   |
|----|-----|----|--------|-------|---|
| 4  | -20 | 5  | 8.50   | 8.83  | 1 |
| -4 | 20  | -5 | -0.19  | 7.63  | 2 |
| 4  | -20 | 5  | 9.72   | 9.31  | 4 |
| 5  | -20 | 5  | -3.83  | 7.70  | 1 |
| -5 | 20  | -5 | 0.21   | 6.97  | 2 |
| -6 | 20  | -5 | 3.23   | 6.91  | 2 |
| 6  | -20 | 5  | -3.16  | 8.50  | 1 |
| -7 | 20  | -5 | -5.70  | 6.37  | 2 |
| -3 | -19 | 5  | -12.17 | 10.11 | 1 |
| -3 | -19 | 5  | 3.75   | 8.50  | 4 |
| -2 | -19 | 5  | -0.77  | 11.40 | 1 |
| -2 | -19 | 5  | 6.10   | 9.51  | 4 |
| -1 | -19 | 5  | 2.81   | 7.69  | 4 |
| -1 | -19 | 5  | 6.63   | 8.58  | 1 |
| 0  | -19 | 5  | -4.95  | 7.42  | 4 |
| 0  | -19 | 5  | -2.82  | 7.61  | 1 |
| 1  | -19 | 5  | 13.25  | 8.41  | 4 |
| 1  | -19 | 5  | -2.25  | 7.47  | 1 |
| 2  | -19 | 5  | 15.91  | 9.12  | 4 |
| 2  | -19 | 5  | -2.44  | 8.31  | 1 |
| 3  | -19 | 5  | -7.42  | 7.51  | 1 |
| -3 | 19  | -5 | 3.79   | 8.80  | 2 |
| 3  | -19 | 5  | 8.47   | 9.71  | 4 |
| -4 | 19  | -5 | -6.07  | 7.16  | 2 |
| 4  | -19 | 5  | 1.34   | 8.72  | 1 |
| 4  | -19 | 5  | 6.03   | 8.69  | 4 |
| 5  | -19 | 5  | 47.37  | 13.13 | 1 |
| 5  | -19 | 5  | 45.20  | 11.91 | 4 |
| -5 | 19  | -5 | 37.81  | 12.44 | 2 |
| 6  | -19 | 5  | 190.78 | 21.25 | 1 |
| -7 | 19  | -5 | -2.72  | 6.81  | 2 |
| -8 | 19  | -5 | 4.85   | 6.70  | 2 |
| -9 | 19  | -5 | 6.41   | 7.69  | 2 |
| -5 | -18 | 5  | -7.91  | 10.81 | 1 |
| -5 | -18 | 5  | 8.89   | 11.54 | 4 |
| -4 | -18 | 5  | 21.76  | 11.14 | 4 |
| -4 | -18 | 5  | 2.26   | 10.65 | 1 |
| -3 | -18 | 5  | 15.80  | 11.27 | 1 |
| -3 | -18 | 5  | 35.29  | 10.62 | 4 |
| -2 | -18 | 5  | 63.22  | 15.08 | 1 |
| -2 | -18 | 5  | 43.46  | 11.34 | 4 |
| -1 | -18 | 5  | 32.20  | 11.45 | 4 |
| -1 | -18 | 5  | 33.88  | 11.55 | 1 |
| 0  | -18 | 5  | 34.19  | 11.23 | 4 |
| 0  | -18 | 5  | 36.27  | 11.01 | 1 |
| 1  | -18 | 5  | 30.84  | 11.24 | 1 |

|     |     |    |        |       |   |
|-----|-----|----|--------|-------|---|
| 1   | -18 | 5  | 33.51  | 10.55 | 4 |
| 2   | -18 | 5  | -8.13  | 6.38  | 4 |
| 2   | -18 | 5  | -2.06  | 7.76  | 1 |
| -2  | 18  | -5 | 23.60  | 10.94 | 2 |
| -3  | 18  | -5 | 25.50  | 10.77 | 2 |
| 3   | -18 | 5  | 11.21  | 8.85  | 1 |
| 3   | -18 | 5  | 23.79  | 10.64 | 4 |
| 4   | -18 | 5  | 17.63  | 9.62  | 4 |
| 4   | -18 | 5  | 10.83  | 9.37  | 1 |
| -4  | 18  | -5 | 11.13  | 9.42  | 2 |
| 5   | -18 | 5  | -7.51  | 7.74  | 1 |
| 5   | -18 | 5  | -5.34  | 7.96  | 4 |
| -5  | 18  | -5 | -5.33  | 6.95  | 2 |
| 6   | -18 | 5  | 10.81  | 9.82  | 1 |
| -6  | 18  | -5 | 7.50   | 9.16  | 2 |
| 6   | -18 | 5  | 20.25  | 9.39  | 4 |
| -7  | 18  | -5 | 84.15  | 17.25 | 2 |
| -8  | 18  | -5 | 62.97  | 14.90 | 2 |
| -9  | 18  | -5 | 6.01   | 8.31  | 2 |
| -10 | 18  | -5 | 3.11   | 8.35  | 2 |
| -11 | 18  | -5 | 37.91  | 13.29 | 2 |
| -6  | -17 | 5  | 8.74   | 10.64 | 4 |
| -6  | -17 | 5  | -11.30 | 11.30 | 1 |
| -5  | -17 | 5  | 5.02   | 9.71  | 1 |
| -5  | -17 | 5  | 12.37  | 8.65  | 4 |
| -4  | -17 | 5  | -1.30  | 6.81  | 4 |
| -4  | -17 | 5  | 10.96  | 10.51 | 1 |
| -3  | -17 | 5  | -0.56  | 5.71  | 4 |
| -3  | -17 | 5  | 9.03   | 8.94  | 1 |
| -2  | -17 | 5  | -4.38  | 5.12  | 4 |
| -2  | -17 | 5  | 10.96  | 8.78  | 1 |
| -1  | -17 | 5  | -7.76  | 7.13  | 1 |
| -1  | -17 | 5  | 2.36   | 7.24  | 4 |
| 0   | -17 | 5  | 41.87  | 10.79 | 4 |
| 0   | -17 | 5  | 12.14  | 8.78  | 1 |
| 1   | -17 | 5  | 56.98  | 12.27 | 4 |
| 1   | -17 | 5  | 39.82  | 11.68 | 1 |
| 2   | -17 | 5  | 43.56  | 11.19 | 4 |
| -2  | 17  | -5 | 36.58  | 11.83 | 2 |
| 2   | -17 | 5  | 23.81  | 10.32 | 1 |
| 3   | -17 | 5  | 102.32 | 15.25 | 4 |
| 3   | -17 | 5  | 112.68 | 16.01 | 1 |
| -3  | 17  | -5 | 86.35  | 16.91 | 2 |
| 4   | -17 | 5  | 11.21  | 8.59  | 4 |
| 4   | -17 | 5  | 16.59  | 9.41  | 1 |
| -4  | 17  | -5 | 11.38  | 8.24  | 2 |

|     |     |    |       |       |   |
|-----|-----|----|-------|-------|---|
| 5   | -17 | 5  | 29.83 | 10.01 | 1 |
| 5   | -17 | 5  | 34.93 | 10.66 | 4 |
| -5  | 17  | -5 | 28.26 | 11.16 | 2 |
| 6   | -17 | 5  | 75.16 | 14.62 | 1 |
| -6  | 17  | -5 | 51.15 | 13.58 | 2 |
| 6   | -17 | 5  | 57.88 | 13.36 | 4 |
| -7  | 17  | -5 | 0.02  | 7.25  | 2 |
| -8  | 17  | -5 | -1.26 | 6.95  | 2 |
| -9  | 17  | -5 | 10.45 | 8.30  | 2 |
| -10 | 17  | -5 | 4.58  | 8.57  | 2 |
| -11 | 17  | -5 | 0.22  | 7.30  | 2 |
| -12 | 17  | -5 | -4.34 | 6.78  | 2 |
| -7  | -16 | 5  | 11.32 | 8.71  | 4 |
| -7  | -16 | 5  | -5.81 | 11.17 | 1 |
| -6  | -16 | 5  | 62.62 | 14.50 | 4 |
| -6  | -16 | 5  | 48.33 | 15.70 | 1 |
| -5  | -16 | 5  | 1.09  | 6.98  | 4 |
| -5  | -16 | 5  | 13.11 | 11.15 | 1 |
| -4  | -16 | 5  | 76.36 | 15.16 | 1 |
| -4  | -16 | 5  | 77.56 | 13.26 | 4 |
| -3  | -16 | 5  | 74.67 | 13.17 | 4 |
| -3  | -16 | 5  | 77.43 | 13.76 | 1 |
| -2  | -16 | 5  | 11.35 | 7.96  | 1 |
| -2  | -16 | 5  | 2.10  | 5.38  | 4 |
| -1  | -16 | 5  | 7.27  | 7.87  | 1 |
| -1  | -16 | 5  | 15.39 | 8.40  | 4 |
| 0   | -16 | 5  | 30.54 | 10.00 | 4 |
| 0   | -16 | 5  | 30.80 | 9.87  | 1 |
| -1  | 16  | -5 | 0.88  | 7.78  | 2 |
| 1   | -16 | 5  | 4.85  | 7.07  | 4 |
| 1   | -16 | 5  | -0.12 | 6.25  | 1 |
| 2   | -16 | 5  | -7.00 | 5.57  | 4 |
| 2   | -16 | 5  | -1.37 | 5.87  | 1 |
| -2  | 16  | -5 | -4.79 | 6.24  | 2 |
| 3   | -16 | 5  | 97.61 | 14.14 | 4 |
| -3  | 16  | -5 | 92.41 | 16.03 | 2 |
| 3   | -16 | 5  | 73.31 | 12.84 | 1 |
| -4  | 16  | -5 | 41.01 | 11.59 | 2 |
| 4   | -16 | 5  | 39.91 | 9.99  | 4 |
| 4   | -16 | 5  | 20.07 | 8.65  | 1 |
| -5  | 16  | -5 | 7.88  | 7.63  | 2 |
| 5   | -16 | 5  | -7.19 | 4.69  | 4 |
| 5   | -16 | 5  | 1.35  | 5.70  | 1 |
| -6  | 16  | -5 | 70.39 | 14.86 | 2 |
| 6   | -16 | 5  | 84.91 | 13.22 | 4 |
| 6   | -16 | 5  | 55.86 | 11.49 | 1 |

|     |     |    |        |       |   |
|-----|-----|----|--------|-------|---|
| -7  | 16  | -5 | 14.54  | 8.82  | 2 |
| -8  | 16  | -5 | -2.36  | 7.18  | 2 |
| -9  | 16  | -5 | 26.97  | 10.44 | 2 |
| -10 | 16  | -5 | 90.13  | 17.20 | 2 |
| -11 | 16  | -5 | 21.86  | 10.21 | 2 |
| -12 | 16  | -5 | 10.31  | 9.59  | 2 |
| -13 | 16  | -5 | 14.30  | 10.60 | 2 |
| -8  | -15 | 5  | 45.38  | 12.92 | 4 |
| -8  | -15 | 5  | 60.40  | 17.07 | 1 |
| -7  | -15 | 5  | 21.36  | 13.44 | 1 |
| -7  | -15 | 5  | 19.29  | 9.48  | 4 |
| -6  | -15 | 5  | 53.29  | 13.00 | 1 |
| -6  | -15 | 5  | 31.26  | 10.19 | 4 |
| -5  | -15 | 5  | 16.37  | 9.34  | 1 |
| -5  | -15 | 5  | 16.68  | 6.72  | 4 |
| -4  | -15 | 5  | -3.52  | 5.38  | 4 |
| -4  | -15 | 5  | 13.85  | 8.64  | 1 |
| -1  | 15  | -5 | 53.82  | 11.73 | 2 |
| -2  | 15  | -5 | 113.31 | 16.70 | 2 |
| 3   | -15 | 5  | 127.41 | 14.99 | 4 |
| -3  | 15  | -5 | 114.46 | 16.21 | 2 |
| 3   | -15 | 5  | 103.53 | 14.14 | 1 |
| -4  | 15  | -5 | -1.76  | 5.75  | 2 |
| 4   | -15 | 5  | 9.42   | 6.88  | 4 |
| 4   | -15 | 5  | 1.48   | 6.10  | 1 |
| -5  | 15  | -5 | 30.19  | 9.75  | 2 |
| 5   | -15 | 5  | 11.73  | 7.24  | 1 |
| 5   | -15 | 5  | 32.27  | 8.07  | 4 |
| 6   | -15 | 5  | -6.24  | 5.00  | 4 |
| -6  | 15  | -5 | -3.60  | 5.58  | 2 |
| 6   | -15 | 5  | 7.96   | 6.13  | 1 |
| -7  | 15  | -5 | 1.60   | 7.01  | 2 |
| -8  | 15  | -5 | 1.37   | 6.76  | 2 |
| -9  | 15  | -5 | 5.61   | 6.83  | 2 |
| -10 | 15  | -5 | 13.44  | 8.42  | 2 |
| -11 | 15  | -5 | 15.32  | 8.85  | 2 |
| -12 | 15  | -5 | 12.69  | 9.07  | 2 |
| -13 | 15  | -5 | 15.10  | 10.83 | 2 |
| -8  | -14 | 5  | 103.74 | 17.20 | 4 |
| -8  | -14 | 5  | 119.99 | 20.86 | 1 |
| -7  | -14 | 5  | 31.18  | 10.54 | 4 |
| -7  | -14 | 5  | 21.09  | 10.04 | 1 |
| -6  | -14 | 5  | 110.34 | 17.46 | 1 |
| -6  | -14 | 5  | 131.57 | 17.97 | 4 |
| 4   | 14  | -5 | 97.39  | 15.55 | 1 |
| 3   | 14  | -5 | 8.88   | 6.24  | 1 |



|     |     |    |        |       |   |
|-----|-----|----|--------|-------|---|
| 2   | 14  | -5 | 6.18   | 6.20  | 1 |
| 1   | 14  | -5 | 56.67  | 10.97 | 1 |
| 0   | 14  | -5 | 14.97  | 5.99  | 1 |
| 0   | 14  | -5 | 13.89  | 7.97  | 2 |
| -1  | 14  | -5 | 69.83  | 11.22 | 1 |
| -1  | 14  | -5 | 87.03  | 14.38 | 2 |
| -2  | 14  | -5 | 3.14   | 4.21  | 1 |
| -2  | 14  | -5 | 11.70  | 6.95  | 2 |
| -3  | 14  | -5 | 3.42   | 4.43  | 1 |
| -3  | 14  | -5 | -2.95  | 4.97  | 2 |
| -4  | 14  | -5 | 19.29  | 8.07  | 2 |
| 5   | -14 | 5  | 8.53   | 5.73  | 4 |
| -5  | 14  | -5 | 3.89   | 6.17  | 2 |
| 5   | -14 | 5  | -0.09  | 4.82  | 1 |
| 6   | -14 | 5  | 324.62 | 20.97 | 1 |
| 6   | -14 | 5  | 337.56 | 20.54 | 4 |
| -6  | 14  | -5 | 342.49 | 24.80 | 2 |
| -7  | 14  | -5 | 52.57  | 12.08 | 2 |
| -8  | 14  | -5 | 88.29  | 15.59 | 2 |
| -9  | 14  | -5 | 59.73  | 13.45 | 2 |
| -10 | 14  | -5 | 10.28  | 7.69  | 2 |
| -11 | 14  | -5 | 44.77  | 12.11 | 2 |
| -12 | 14  | -5 | 1.73   | 6.52  | 2 |
| -13 | 14  | -5 | 76.75  | 16.98 | 2 |
| -14 | 14  | -5 | 36.98  | 12.80 | 2 |
| -8  | -13 | 5  | 23.70  | 11.92 | 1 |
| -8  | -13 | 5  | 41.51  | 11.41 | 4 |
| 6   | 13  | -5 | 153.27 | 18.39 | 1 |
| 5   | 13  | -5 | 316.94 | 23.43 | 1 |
| 4   | 13  | -5 | 20.37  | 8.50  | 1 |
| 3   | 13  | -5 | 176.75 | 18.06 | 1 |
| 2   | 13  | -5 | 5.17   | 5.55  | 1 |
| 1   | 13  | -5 | 97.01  | 13.13 | 1 |
| 0   | 13  | -5 | 607.90 | 30.31 | 1 |
| 0   | 13  | -5 | 523.11 | 29.93 | 2 |
| -1  | 13  | -5 | 125.70 | 13.96 | 1 |
| -1  | 13  | -5 | 110.85 | 14.73 | 2 |
| -2  | 13  | -5 | 165.72 | 16.86 | 2 |
| -2  | 13  | -5 | 137.13 | 14.05 | 1 |
| -3  | 13  | -5 | 7.38   | 6.03  | 2 |
| -3  | 13  | -5 | 0.11   | 3.11  | 1 |
| -4  | 13  | -5 | 221.75 | 16.12 | 1 |
| -4  | 13  | -5 | 233.65 | 19.22 | 2 |
| -5  | 13  | -5 | 94.41  | 14.43 | 2 |
| 6   | -13 | 5  | 18.73  | 6.14  | 1 |
| -6  | 13  | -5 | 17.21  | 7.71  | 2 |

|     |     |    |        |       |   |
|-----|-----|----|--------|-------|---|
| 6   | -13 | 5  | 31.22  | 7.51  | 4 |
| -7  | 13  | -5 | 281.11 | 22.57 | 2 |
| -8  | 13  | -5 | 64.84  | 12.96 | 2 |
| -9  | 13  | -5 | -1.66  | 5.23  | 2 |
| -10 | 13  | -5 | 15.49  | 9.04  | 2 |
| -11 | 13  | -5 | 35.13  | 10.69 | 2 |
| -12 | 13  | -5 | -4.05  | 5.67  | 2 |
| -13 | 13  | -5 | 177.34 | 23.19 | 2 |
| -14 | 13  | -5 | 9.86   | 10.26 | 2 |
| -9  | -12 | 5  | 226.87 | 25.25 | 1 |
| -9  | -12 | 5  | 209.83 | 23.86 | 4 |
| 8   | 12  | -5 | 46.55  | 12.10 | 1 |
| 7   | 12  | -5 | 7.81   | 7.08  | 1 |
| 6   | 12  | -5 | 305.53 | 22.72 | 1 |
| 5   | 12  | -5 | 234.14 | 19.41 | 1 |
| 4   | 12  | -5 | 14.61  | 7.13  | 1 |
| 3   | 12  | -5 | 65.45  | 11.32 | 1 |
| 2   | 12  | -5 | 573.33 | 29.70 | 1 |
| 1   | 12  | -5 | 185.67 | 15.87 | 2 |
| 1   | 12  | -5 | 151.72 | 13.40 | 1 |
| 0   | 12  | -5 | 84.15  | 12.24 | 2 |
| 0   | 12  | -5 | 91.79  | 11.58 | 1 |
| -1  | 12  | -5 | 8.09   | 4.74  | 2 |
| -1  | 12  | -5 | 12.79  | 4.99  | 1 |
| -2  | 12  | -5 | 309.82 | 18.61 | 1 |
| -2  | 12  | -5 | 259.83 | 18.87 | 2 |
| -3  | 12  | -5 | 34.99  | 7.04  | 1 |
| -3  | 12  | -5 | 33.23  | 8.58  | 2 |
| -4  | 12  | -5 | 664.49 | 30.24 | 1 |
| -4  | 12  | -5 | 685.20 | 33.99 | 2 |
| -5  | 12  | -5 | 87.75  | 13.23 | 2 |
| -5  | 12  | -5 | 73.62  | 9.87  | 1 |
| -6  | 12  | -5 | 33.36  | 9.48  | 2 |
| -7  | 12  | -5 | 259.62 | 20.82 | 2 |
| -8  | 12  | -5 | 173.79 | 19.49 | 2 |
| -9  | 12  | -5 | 178.12 | 20.20 | 2 |
| -10 | 12  | -5 | -4.54  | 5.05  | 2 |
| -11 | 12  | -5 | 173.40 | 21.67 | 2 |
| -12 | 12  | -5 | 11.02  | 7.93  | 2 |
| -13 | 12  | -5 | 8.89   | 7.68  | 2 |
| -14 | 12  | -5 | 192.02 | 24.76 | 2 |
| -15 | 12  | -5 | -4.38  | 7.42  | 2 |
| 9   | 11  | -5 | 15.93  | 8.28  | 1 |
| 8   | 11  | -5 | 276.41 | 21.24 | 1 |
| 7   | 11  | -5 | 388.82 | 25.22 | 1 |
| 6   | 11  | -5 | 13.57  | 7.18  | 1 |

|     |    |    |         |       |   |
|-----|----|----|---------|-------|---|
| 5   | 11 | -5 | 116.97  | 14.20 | 1 |
| 4   | 11 | -5 | 68.54   | 11.36 | 1 |
| 3   | 11 | -5 | 96.26   | 12.50 | 1 |
| 2   | 11 | -5 | 394.84  | 22.72 | 1 |
| 1   | 11 | -5 | 134.90  | 12.08 | 1 |
| 1   | 11 | -5 | 148.96  | 14.47 | 2 |
| 0   | 11 | -5 | 237.54  | 17.05 | 2 |
| 0   | 11 | -5 | 238.37  | 16.29 | 1 |
| -1  | 11 | -5 | 93.93   | 11.83 | 2 |
| -1  | 11 | -5 | 103.14  | 11.24 | 1 |
| -2  | 11 | -5 | 161.34  | 13.74 | 2 |
| -2  | 11 | -5 | 169.27  | 13.21 | 1 |
| -3  | 11 | -5 | 109.61  | 10.89 | 1 |
| -3  | 11 | -5 | 96.67   | 12.37 | 2 |
| -4  | 11 | -5 | 3.33    | 4.65  | 2 |
| -4  | 11 | -5 | 9.10    | 3.98  | 1 |
| -5  | 11 | -5 | 975.01  | 38.46 | 1 |
| -5  | 11 | -5 | 1024.25 | 44.25 | 2 |
| -6  | 11 | -5 | 512.17  | 24.31 | 1 |
| -6  | 11 | -5 | 525.85  | 29.76 | 2 |
| -7  | 11 | -5 | 26.85   | 8.56  | 2 |
| -8  | 11 | -5 | 13.78   | 6.76  | 2 |
| -9  | 11 | -5 | 33.14   | 9.28  | 2 |
| -10 | 11 | -5 | 65.51   | 13.37 | 2 |
| -11 | 11 | -5 | 76.06   | 14.49 | 2 |
| -12 | 11 | -5 | 5.01    | 6.35  | 2 |
| -13 | 11 | -5 | 2.86    | 6.03  | 2 |
| -14 | 11 | -5 | 3.47    | 7.05  | 2 |
| -15 | 11 | -5 | -1.58   | 6.94  | 2 |
| 9   | 10 | -5 | 7.61    | 7.24  | 1 |
| 8   | 10 | -5 | 73.42   | 12.73 | 1 |
| 7   | 10 | -5 | 23.07   | 8.04  | 1 |
| 6   | 10 | -5 | 0.96    | 4.88  | 1 |
| 5   | 10 | -5 | 1.32    | 4.66  | 1 |
| 4   | 10 | -5 | 737.37  | 33.57 | 1 |
| 3   | 10 | -5 | 81.21   | 10.95 | 1 |
| 2   | 10 | -5 | 7.19    | 4.40  | 1 |
| 1   | 10 | -5 | 373.60  | 20.83 | 1 |
| 1   | 10 | -5 | 380.07  | 21.17 | 2 |
| 0   | 10 | -5 | 167.68  | 13.07 | 2 |
| 0   | 10 | -5 | 141.82  | 12.11 | 1 |
| -1  | 10 | -5 | 621.87  | 28.62 | 2 |
| -1  | 10 | -5 | 571.39  | 26.82 | 1 |
| -2  | 10 | -5 | 4.34    | 3.63  | 1 |
| -2  | 10 | -5 | 0.82    | 3.40  | 2 |
| -3  | 10 | -5 | 45.26   | 7.41  | 1 |

-3 10 -5 44.82 8.55 2  
-4 10 -5 209.14 15.59 2  
-4 10 -5 172.55 12.46 1  
-5 10 -5 391.98 19.87 1  
-5 10 -5 466.87 25.69 2  
-6 10 -5 47.16 7.00 1  
-6 10 -5 26.13 7.91 2  
-7 10 -5 307.69 21.98 2  
-8 10 -5 69.36 12.54 2  
-9 10 -5 154.03 17.47 2  
-10 10 -5 -2.44 3.88 2  
-11 10 -5 7.05 5.52 2  
-12 10 -5 298.22 24.98 2  
-13 10 -5 1.79 5.63 2  
-14 10 -5 208.83 24.35 2  
-15 10 -5 13.84 8.62 2  
-13 -9 5 34.83 12.72 3  
-12 -9 5 15.38 9.49 3  
-11 -9 5 4.41 7.87 3  
-10 -9 5 172.71 18.29 3  
9 9 -5 46.06 10.56 1  
-9 -9 5 54.92 10.65 3  
8 9 -5 12.31 6.24 1  
-8 -9 5 14.00 6.68 3  
-7 -9 5 2.74 4.77 3  
7 9 -5 2.69 4.52 1  
6 9 -5 1.49 4.10 1  
-6 -9 5 0.44 3.92 3  
-5 -9 5 124.38 10.40 3  
5 9 -5 102.35 11.73 1  
-4 -9 5 155.08 11.08 3  
4 9 -5 158.10 13.22 1  
3 9 -5 66.42 9.65 1  
2 9 -5 0.93 3.40 1  
2 9 -5 0.55 3.23 2  
1 9 -5 238.64 15.09 2  
1 9 -5 190.60 13.93 1  
0 9 -5 5.87 3.47 1  
0 9 -5 0.81 2.70 2  
-1 9 -5 89.60 9.60 1  
-1 9 -5 108.38 11.08 2  
-2 9 -5 944.51 35.69 1  
-2 9 -5 911.74 37.13 2  
-3 9 -5 1735.43 57.18 1  
-3 9 -5 1714.31 61.14 2  
-4 9 -5 87.98 8.51 1

|     |    |    |         |       |   |
|-----|----|----|---------|-------|---|
| -4  | 9  | -5 | 75.98   | 10.76 | 2 |
| -5  | 9  | -5 | 144.71  | 10.17 | 1 |
| -5  | 9  | -5 | 160.01  | 13.96 | 2 |
| -6  | 9  | -5 | 154.52  | 15.63 | 2 |
| -6  | 9  | -5 | 165.12  | 10.85 | 1 |
| -7  | 9  | -5 | 30.08   | 8.53  | 2 |
| -8  | 9  | -5 | 1100.62 | 48.87 | 2 |
| -9  | 9  | -5 | 17.39   | 7.06  | 2 |
| -10 | 9  | -5 | 110.48  | 16.04 | 2 |
| -11 | 9  | -5 | 14.69   | 7.29  | 2 |
| -12 | 9  | -5 | 263.73  | 23.38 | 2 |
| -13 | 9  | -5 | 0.91    | 5.48  | 2 |
| -14 | 9  | -5 | 6.82    | 7.36  | 2 |
| -15 | 9  | -5 | 187.73  | 24.32 | 2 |
| -14 | -8 | 5  | 6.99    | 10.65 | 3 |
| -13 | -8 | 5  | 18.86   | 9.33  | 3 |
| -12 | -8 | 5  | 4.39    | 7.15  | 3 |
| -11 | -8 | 5  | 13.80   | 7.84  | 3 |
| -10 | -8 | 5  | 1.87    | 5.28  | 3 |
| -9  | -8 | 5  | -2.81   | 4.26  | 3 |
| 9   | 8  | -5 | 4.37    | 5.47  | 1 |
| 8   | 8  | -5 | 21.04   | 6.71  | 1 |
| -8  | -8 | 5  | 38.07   | 8.31  | 3 |
| 7   | 8  | -5 | 54.02   | 9.14  | 1 |
| -7  | -8 | 5  | 68.32   | 9.88  | 3 |
| -6  | -8 | 5  | 148.47  | 12.17 | 3 |
| 6   | 8  | -5 | 144.54  | 12.86 | 1 |
| 5   | 8  | -5 | 142.81  | 12.62 | 1 |
| -5  | -8 | 5  | 158.14  | 11.79 | 3 |
| 4   | 8  | -5 | 327.37  | 18.80 | 1 |
| -4  | -8 | 5  | 312.33  | 16.14 | 3 |
| 3   | 8  | -5 | 268.11  | 16.55 | 1 |
| -3  | -8 | 5  | 271.47  | 13.53 | 3 |
| -2  | -8 | 5  | 44.06   | 4.87  | 3 |
| 2   | 8  | -5 | 39.11   | 7.23  | 1 |
| 2   | 8  | -5 | 46.08   | 7.14  | 2 |
| -1  | -8 | 5  | 237.67  | 10.11 | 3 |
| 1   | 8  | -5 | 263.16  | 15.27 | 1 |
| 1   | 8  | -5 | 275.86  | 15.14 | 2 |
| 0   | 8  | -5 | 273.22  | 15.62 | 1 |
| 0   | 8  | -5 | 274.48  | 15.59 | 2 |
| -1  | 8  | -5 | 77.53   | 8.84  | 2 |
| -1  | 8  | -5 | 101.07  | 8.69  | 1 |
| -2  | 8  | -5 | 289.68  | 16.58 | 2 |
| -2  | 8  | -5 | 271.96  | 14.98 | 1 |
| -3  | 8  | -5 | 89.71   | 7.94  | 1 |

-3 8 -5 93.96 10.60 2  
-4 8 -5 841.13 31.17 1  
-4 8 -5 829.60 35.40 2  
-5 8 -5 8.27 3.26 1  
-5 8 -5 18.21 5.75 2  
-6 8 -5 449.15 18.93 1  
-6 8 -5 411.12 24.32 2  
-7 8 -5 1.62 3.60 2  
-8 8 -5 71.73 11.93 2  
-9 8 -5 201.23 17.93 2  
-10 8 -5 104.03 15.56 2  
-11 8 -5 8.43 5.81 2  
-12 8 -5 120.06 17.88 2  
-13 8 -5 16.22 7.43 2  
-14 8 -5 -3.30 6.13 2  
-15 8 -5 69.30 15.94 2  
-14 -7 5 45.02 13.33 3  
-13 -7 5 196.87 22.67 3  
-12 -7 5 23.65 10.14 3  
-11 -7 5 69.51 12.75 3  
-10 -7 5 11.63 7.14 3  
9 7 -5 -0.58 3.70 1  
-9 -7 5 2.37 4.47 3  
8 7 -5 5.77 4.66 1  
-8 -7 5 1.55 3.88 3  
7 7 -5 196.62 14.69 1  
-7 -7 5 184.84 14.24 3  
6 7 -5 187.02 13.97 1  
-6 -7 5 196.88 13.95 3  
-5 -7 5 45.16 7.03 3  
5 7 -5 50.12 7.97 1  
-4 -7 5 65.17 7.29 3  
4 7 -5 76.04 9.00 1  
-3 -7 5 438.64 18.36 3  
3 7 -5 441.89 21.23 1  
-2 -7 5 148.44 8.39 3  
2 7 -5 133.93 10.62 1  
1 7 -5 6.08 2.94 1  
-1 -7 5 7.06 2.06 3  
1 7 -5 7.31 3.30 2  
0 7 -5 684.31 27.00 1  
0 7 -5 636.56 26.45 2  
-1 7 -5 1223.56 42.53 2  
-1 7 -5 1131.09 40.56 1  
-2 7 -5 38.03 6.51 2  
-2 7 -5 34.70 5.44 1

|     |    |    |        |       |   |
|-----|----|----|--------|-------|---|
| -3  | 7  | -5 | 29.26  | 5.98  | 2 |
| -3  | 7  | -5 | 29.90  | 4.98  | 1 |
| -4  | 7  | -5 | 83.02  | 7.15  | 1 |
| -4  | 7  | -5 | 81.18  | 10.10 | 2 |
| -5  | 7  | -5 | 1.40   | 2.37  | 1 |
| -5  | 7  | -5 | 3.12   | 3.76  | 2 |
| -6  | 7  | -5 | 182.75 | 10.17 | 1 |
| -6  | 7  | -5 | 181.07 | 14.95 | 2 |
| -7  | 7  | -5 | 129.06 | 14.33 | 2 |
| -8  | 7  | -5 | 10.51  | 4.80  | 2 |
| -9  | 7  | -5 | 107.28 | 14.38 | 2 |
| -10 | 7  | -5 | 137.81 | 16.59 | 2 |
| -11 | 7  | -5 | 106.47 | 15.57 | 2 |
| -12 | 7  | -5 | 15.96  | 8.10  | 2 |
| -13 | 7  | -5 | 303.22 | 24.69 | 2 |
| -14 | 7  | -5 | 34.93  | 10.67 | 2 |
| -15 | 7  | -5 | 15.38  | 8.91  | 2 |
| -15 | -6 | 5  | -1.29  | 8.78  | 3 |
| -14 | -6 | 5  | 21.91  | 10.29 | 3 |
| -13 | -6 | 5  | 6.60   | 7.81  | 3 |
| -12 | -6 | 5  | 3.73   | 7.03  | 3 |
| -11 | -6 | 5  | 20.94  | 8.13  | 3 |
| -10 | -6 | 5  | 23.55  | 7.89  | 3 |
| 9   | 6  | -5 | 1.37   | 3.45  | 1 |
| -9  | -6 | 5  | 9.72   | 5.47  | 3 |
| -8  | -6 | 5  | 17.13  | 6.10  | 3 |
| -8  | -6 | 5  | 17.08  | 5.60  | 2 |
| 8   | 6  | -5 | 8.53   | 4.62  | 1 |
| -7  | -6 | 5  | 423.05 | 22.57 | 3 |
| 7   | 6  | -5 | 421.25 | 21.65 | 1 |
| -6  | -6 | 5  | 453.20 | 23.20 | 3 |
| 6   | 6  | -5 | 529.22 | 23.83 | 1 |
| 5   | 6  | -5 | 161.87 | 12.01 | 1 |
| -5  | -6 | 5  | 161.15 | 11.47 | 3 |
| -4  | -6 | 5  | 187.89 | 11.48 | 3 |
| 4   | 6  | -5 | 188.54 | 12.65 | 1 |
| -3  | -6 | 5  | 60.16  | 5.99  | 3 |
| 3   | 6  | -5 | 40.92  | 6.39  | 1 |
| 2   | 6  | -5 | 124.07 | 9.44  | 1 |
| -2  | -6 | 5  | 109.93 | 7.15  | 3 |
| 1   | 6  | -5 | 0.91   | 1.67  | 2 |
| 1   | 6  | -5 | 5.28   | 2.72  | 1 |
| -1  | -6 | 5  | 5.64   | 1.90  | 3 |
| 0   | 6  | -5 | 5.22   | 2.62  | 2 |
| 0   | 6  | -5 | 3.34   | 2.46  | 1 |
| -1  | 6  | -5 | 12.54  | 3.63  | 1 |

|     |    |    |         |       |   |
|-----|----|----|---------|-------|---|
| -1  | 6  | -5 | 17.34   | 4.23  | 2 |
| -2  | 6  | -5 | 224.73  | 13.23 | 2 |
| -2  | 6  | -5 | 215.75  | 11.80 | 1 |
| -3  | 6  | -5 | 6.62    | 3.33  | 2 |
| -3  | 6  | -5 | 4.40    | 2.36  | 1 |
| -4  | 6  | -5 | 700.00  | 25.89 | 1 |
| -4  | 6  | -5 | 757.75  | 31.80 | 2 |
| -5  | 6  | -5 | 407.88  | 22.15 | 2 |
| -5  | 6  | -5 | 398.05  | 16.28 | 1 |
| -6  | 6  | -5 | -4.01   | 2.11  | 2 |
| -7  | 6  | -5 | 357.64  | 22.23 | 2 |
| -8  | 6  | -5 | 9.30    | 5.36  | 2 |
| -9  | 6  | -5 | 42.91   | 9.04  | 2 |
| -10 | 6  | -5 | 5.68    | 4.90  | 2 |
| -11 | 6  | -5 | 48.23   | 10.78 | 2 |
| -12 | 6  | -5 | 40.03   | 10.35 | 2 |
| -13 | 6  | -5 | 25.65   | 8.87  | 2 |
| -14 | 6  | -5 | 76.64   | 15.86 | 2 |
| -15 | 6  | -5 | 10.72   | 7.59  | 2 |
| -15 | -5 | 5  | 77.79   | 17.42 | 3 |
| -14 | -5 | 5  | 86.33   | 16.32 | 3 |
| -13 | -5 | 5  | 214.59  | 22.73 | 3 |
| -12 | -5 | 5  | 13.33   | 7.29  | 3 |
| -11 | -5 | 5  | 54.83   | 11.56 | 3 |
| -10 | -5 | 5  | 32.70   | 8.59  | 3 |
| -9  | -5 | 5  | 240.92  | 15.97 | 2 |
| 9   | 5  | -5 | 225.39  | 15.33 | 1 |
| -9  | -5 | 5  | 234.81  | 17.68 | 3 |
| -8  | -5 | 5  | 102.15  | 10.19 | 2 |
| -8  | -5 | 5  | 118.26  | 12.70 | 3 |
| -7  | -5 | 5  | 22.26   | 6.34  | 3 |
| 7   | 5  | -5 | 16.13   | 4.72  | 1 |
| -6  | -5 | 5  | 736.63  | 30.50 | 3 |
| 6   | 5  | -5 | 707.04  | 29.04 | 1 |
| -5  | -5 | 5  | 25.36   | 5.47  | 3 |
| 5   | 5  | -5 | 24.06   | 5.11  | 1 |
| -4  | -5 | 5  | 316.70  | 15.67 | 3 |
| 4   | 5  | -5 | 337.64  | 16.83 | 1 |
| 3   | 5  | -5 | 131.54  | 9.64  | 1 |
| -3  | -5 | 5  | 121.36  | 8.25  | 3 |
| 2   | 5  | -5 | 444.96  | 18.20 | 2 |
| 2   | 5  | -5 | 483.31  | 20.44 | 1 |
| -2  | -5 | 5  | 477.56  | 17.82 | 3 |
| -1  | -5 | 5  | 1610.12 | 49.18 | 3 |
| 1   | 5  | -5 | 1618.15 | 52.25 | 1 |
| 0   | 5  | -5 | 66.94   | 5.92  | 2 |



|     |    |    |        |       |   |
|-----|----|----|--------|-------|---|
| 0   | 5  | -5 | 65.95  | 6.65  | 1 |
| -1  | 5  | -5 | 27.88  | 4.59  | 1 |
| -1  | 5  | -5 | 33.32  | 4.97  | 2 |
| -2  | 5  | -5 | 199.94 | 12.48 | 2 |
| -2  | 5  | -5 | 219.66 | 11.36 | 1 |
| -3  | 5  | -5 | 175.20 | 9.66  | 1 |
| -3  | 5  | -5 | 179.69 | 12.22 | 2 |
| -4  | 5  | -5 | 19.78  | 3.63  | 1 |
| -4  | 5  | -5 | 18.13  | 5.15  | 2 |
| -5  | 5  | -5 | 25.89  | 3.62  | 1 |
| -5  | 5  | -5 | 16.51  | 5.19  | 2 |
| -6  | 5  | -5 | 4.06   | 4.05  | 2 |
| -7  | 5  | -5 | 12.17  | 5.28  | 2 |
| -8  | 5  | -5 | 12.98  | 5.52  | 2 |
| -9  | 5  | -5 | 185.76 | 16.37 | 2 |
| -10 | 5  | -5 | 326.45 | 23.19 | 2 |
| -11 | 5  | -5 | 423.28 | 27.71 | 2 |
| -12 | 5  | -5 | 48.24  | 11.41 | 2 |
| -13 | 5  | -5 | 19.67  | 7.91  | 2 |
| -14 | 5  | -5 | 16.15  | 8.69  | 2 |
| -15 | 5  | -5 | 4.06   | 7.21  | 2 |
| -16 | -4 | 5  | 3.68   | 10.80 | 3 |
| -15 | -4 | 5  | 116.19 | 19.52 | 3 |
| -14 | -4 | 5  | 50.95  | 12.87 | 3 |
| -13 | -4 | 5  | 58.08  | 12.52 | 3 |
| -12 | -4 | 5  | 7.24   | 6.13  | 3 |
| -11 | -4 | 5  | 3.55   | 5.31  | 3 |
| -10 | -4 | 5  | 826.97 | 39.30 | 3 |
| 9   | 4  | -5 | 736.34 | 30.57 | 1 |
| -9  | -4 | 5  | 791.84 | 36.32 | 3 |
| -9  | -4 | 5  | 773.87 | 31.58 | 2 |
| -8  | -4 | 5  | 0.56   | 2.58  | 2 |
| 8   | 4  | -5 | -0.68  | 2.64  | 1 |
| -8  | -4 | 5  | 4.09   | 4.52  | 3 |
| -7  | -4 | 5  | 78.64  | 7.75  | 2 |
| 7   | 4  | -5 | 81.05  | 8.48  | 1 |
| -7  | -4 | 5  | 100.21 | 10.76 | 3 |
| 6   | 4  | -5 | 310.62 | 16.35 | 1 |
| -6  | -4 | 5  | 320.05 | 17.62 | 3 |
| -5  | -4 | 5  | 3.11   | 2.93  | 3 |
| 5   | 4  | -5 | 6.41   | 3.06  | 1 |
| 4   | 4  | -5 | 93.62  | 8.05  | 1 |
| -4  | -4 | 5  | 93.70  | 7.79  | 3 |
| 3   | 4  | -5 | 6.23   | 2.92  | 1 |
| -3  | -4 | 5  | 5.92   | 2.81  | 3 |
| -2  | -4 | 5  | -2.57  | 1.36  | 3 |

|     |    |    |         |       |   |
|-----|----|----|---------|-------|---|
| 2   | 4  | -5 | 2.24    | 1.63  | 2 |
| 2   | 4  | -5 | 1.93    | 2.25  | 1 |
| 1   | 4  | -5 | 585.15  | 21.67 | 2 |
| 1   | 4  | -5 | 632.00  | 23.82 | 1 |
| -1  | -4 | 5  | 627.49  | 21.84 | 3 |
| 0   | 4  | -5 | 564.64  | 21.82 | 1 |
| -1  | 4  | -5 | 641.11  | 23.56 | 1 |
| -1  | 4  | -5 | 631.54  | 24.57 | 2 |
| -2  | 4  | -5 | 93.71   | 6.72  | 1 |
| -2  | 4  | -5 | 107.03  | 8.53  | 2 |
| -3  | 4  | -5 | 2244.48 | 67.37 | 1 |
| -3  | 4  | -5 | 2286.36 | 73.44 | 2 |
| -4  | 4  | -5 | 1631.48 | 55.31 | 2 |
| -4  | 4  | -5 | 1493.79 | 47.42 | 1 |
| -5  | 4  | -5 | 135.26  | 11.33 | 2 |
| -5  | 4  | -5 | 134.44  | 7.47  | 1 |
| -6  | 4  | -5 | 139.05  | 12.29 | 2 |
| -7  | 4  | -5 | 32.59   | 7.57  | 2 |
| -8  | 4  | -5 | 1.70    | 2.92  | 2 |
| -9  | 4  | -5 | 0.35    | 3.48  | 2 |
| -10 | 4  | -5 | 20.42   | 6.57  | 2 |
| -11 | 4  | -5 | -7.53   | 2.99  | 2 |
| -12 | 4  | -5 | 127.72  | 18.02 | 2 |
| -13 | 4  | -5 | 4.99    | 5.80  | 2 |
| -14 | 4  | -5 | 28.27   | 9.92  | 2 |
| -15 | 4  | -5 | 55.17   | 14.95 | 2 |
| -16 | -3 | 5  | 67.31   | 17.08 | 3 |
| -15 | -3 | 5  | 166.30  | 21.84 | 3 |
| -14 | -3 | 5  | 0.56    | 6.25  | 3 |
| -13 | -3 | 5  | 190.51  | 20.73 | 3 |
| -12 | -3 | 5  | 0.18    | 5.27  | 3 |
| -11 | -3 | 5  | 84.20   | 13.08 | 3 |
| -10 | -3 | 5  | 6.84    | 5.25  | 3 |
| -9  | -3 | 5  | 7.10    | 5.05  | 3 |
| -9  | -3 | 5  | 11.61   | 3.88  | 2 |
| 9   | 3  | -5 | 20.58   | 4.96  | 1 |
| -8  | -3 | 5  | 235.55  | 13.26 | 2 |
| 8   | 3  | -5 | 242.21  | 14.06 | 1 |
| -8  | -3 | 5  | 227.08  | 16.48 | 3 |
| -7  | -3 | 5  | 0.57    | 3.13  | 3 |
| 7   | 3  | -5 | 1.53    | 2.14  | 1 |
| -7  | -3 | 5  | 5.43    | 2.54  | 2 |
| -6  | -3 | 5  | 1909.37 | 60.05 | 2 |
| -6  | -3 | 5  | 1991.28 | 65.43 | 3 |
| 6   | 3  | -5 | 1964.64 | 62.28 | 1 |
| -5  | -3 | 5  | 59.06   | 7.21  | 3 |

|     |    |    |        |       |   |
|-----|----|----|--------|-------|---|
| 5   | 3  | -5 | 62.91  | 6.96  | 1 |
| -4  | -3 | 5  | -2.91  | 1.79  | 3 |
| 4   | 3  | -5 | 3.07   | 2.55  | 1 |
| 3   | 3  | -5 | 464.04 | 19.46 | 1 |
| -3  | -3 | 5  | 453.41 | 18.68 | 3 |
| 2   | 3  | -5 | 0.87   | 1.80  | 1 |
| -2  | -3 | 5  | 2.29   | 1.86  | 3 |
| 2   | 3  | -5 | 1.36   | 1.23  | 2 |
| -1  | -3 | 5  | 597.92 | 21.74 | 3 |
| 1   | 3  | -5 | 562.93 | 19.98 | 2 |
| 1   | 3  | -5 | 582.86 | 22.35 | 1 |
| 0   | 3  | -5 | 46.62  | 5.10  | 1 |
| -1  | 3  | -5 | 370.01 | 16.47 | 2 |
| -1  | 3  | -5 | 365.86 | 15.45 | 1 |
| -2  | 3  | -5 | -1.00  | 2.20  | 2 |
| -2  | 3  | -5 | 0.85   | 1.87  | 1 |
| -3  | 3  | -5 | 155.76 | 11.03 | 2 |
| -3  | 3  | -5 | 160.06 | 8.62  | 1 |
| -4  | 3  | -5 | 1.41   | 2.57  | 2 |
| -4  | 3  | -5 | 2.61   | 1.90  | 1 |
| -5  | 3  | -5 | 254.69 | 16.09 | 2 |
| -5  | 3  | -5 | 258.14 | 11.01 | 1 |
| -6  | 3  | -5 | 139.06 | 12.21 | 2 |
| -7  | 3  | -5 | 167.41 | 14.09 | 2 |
| -8  | 3  | -5 | 116.63 | 13.74 | 2 |
| -9  | 3  | -5 | 5.68   | 4.61  | 2 |
| -10 | 3  | -5 | 33.63  | 8.71  | 2 |
| -11 | 3  | -5 | 4.78   | 4.75  | 2 |
| -12 | 3  | -5 | 3.34   | 5.07  | 2 |
| -13 | 3  | -5 | 14.71  | 7.79  | 2 |
| -14 | 3  | -5 | 12.86  | 8.53  | 2 |
| -15 | 3  | -5 | 26.59  | 11.30 | 2 |
| -16 | -2 | 5  | 33.56  | 12.65 | 3 |
| -15 | -2 | 5  | 12.02  | 8.38  | 3 |
| -14 | -2 | 5  | 7.38   | 6.93  | 3 |
| -13 | -2 | 5  | 8.95   | 6.49  | 3 |
| -12 | -2 | 5  | 310.58 | 23.47 | 3 |
| -11 | -2 | 5  | 78.93  | 12.78 | 3 |
| -10 | -2 | 5  | -2.45  | 3.68  | 3 |
| -9  | -2 | 5  | 634.70 | 31.12 | 3 |
| 9   | 2  | -5 | 654.47 | 26.08 | 1 |
| -9  | -2 | 5  | 616.28 | 25.69 | 2 |
| -8  | -2 | 5  | 607.12 | 24.20 | 2 |
| 8   | 2  | -5 | 613.17 | 25.27 | 1 |
| -8  | -2 | 5  | 687.47 | 30.49 | 3 |
| -7  | -2 | 5  | 16.21  | 5.24  | 3 |

-7 -2 5 10.70 3.11 2  
-6 -2 5 281.29 12.00 2  
-6 -2 5 270.70 15.83 3  
6 2 -5 289.45 14.63 1  
5 2 -5 1767.21 56.18 1  
-5 -2 5 1732.81 52.28 2  
-5 -2 5 1782.94 58.38 3  
-4 -2 5 79.43 7.49 3  
4 2 -5 78.96 7.04 1  
-3 -2 5 736.43 26.94 3  
3 2 -5 758.45 27.36 1  
-2 -2 5 88.84 6.54 3  
2 2 -5 85.22 4.39 2  
2 2 -5 86.86 6.82 1  
1 2 -5 1405.74 42.40 2  
1 2 -5 1356.42 44.04 1  
0 2 -5 170.69 9.52 1  
-1 2 -5 5440.17 154.31 1  
-1 2 -5 5471.35 158.83 2  
-2 2 -5 2593.86 81.71 2  
-2 2 -5 2688.70 77.58 1  
-3 2 -5 267.57 11.78 1  
-3 2 -5 265.00 14.72 2  
-4 2 -5 87.31 6.07 1  
-4 2 -5 99.76 9.66 2  
-5 2 -5 56.68 8.45 2  
-5 2 -5 44.77 4.36 1  
-6 2 -5 628.55 29.31 2  
-7 2 -5 30.03 7.13 2  
-8 2 -5 176.25 15.13 2  
-9 2 -5 3.54 4.31 2  
-10 2 -5 67.51 12.48 2  
-11 2 -5 60.95 12.91 2  
-12 2 -5 82.72 14.86 2  
-13 2 -5 136.62 19.39 2  
-14 2 -5 29.52 10.66 2  
-15 2 -5 31.25 11.78 2  
-17 -1 5 25.88 11.36 3  
-16 -1 5 29.16 11.45 3  
-15 -1 5 12.43 7.69 3  
-14 -1 5 14.95 8.06 3  
-13 -1 5 13.62 7.41 3  
-12 -1 5 30.76 9.61 3  
-11 -1 5 416.20 26.10 3  
-10 -1 5 -0.23 4.29 3  
9 1 -5 205.67 12.43 1

|     |    |    |         |        |   |
|-----|----|----|---------|--------|---|
| -9  | -1 | 5  | 200.86  | 15.76  | 3 |
| -9  | -1 | 5  | 203.01  | 12.10  | 2 |
| -8  | -1 | 5  | 330.33  | 19.52  | 3 |
| 8   | 1  | -5 | 337.70  | 16.27  | 1 |
| -8  | -1 | 5  | 298.91  | 14.64  | 2 |
| 7   | 1  | -5 | 5.82    | 2.88   | 1 |
| -7  | -1 | 5  | 6.11    | 2.49   | 2 |
| -7  | -1 | 5  | 3.89    | 3.44   | 3 |
| 6   | 1  | -5 | 877.32  | 31.57  | 1 |
| -6  | -1 | 5  | 873.20  | 34.07  | 3 |
| -6  | -1 | 5  | 865.07  | 28.15  | 2 |
| -5  | -1 | 5  | 3247.65 | 93.64  | 2 |
| 5   | 1  | -5 | 3295.97 | 97.06  | 1 |
| -5  | -1 | 5  | 3267.57 | 100.11 | 3 |
| 4   | 1  | -5 | 191.17  | 10.95  | 1 |
| -4  | -1 | 5  | 189.50  | 11.23  | 3 |
| -3  | -1 | 5  | 496.71  | 20.37  | 3 |
| 3   | 1  | -5 | 510.55  | 20.21  | 1 |
| 2   | 1  | -5 | 8.85    | 2.96   | 1 |
| -2  | -1 | 5  | 12.85   | 3.23   | 3 |
| 1   | 1  | -5 | 709.90  | 23.25  | 2 |
| 1   | 1  | -5 | 681.12  | 24.77  | 1 |
| 0   | 1  | -5 | 1676.43 | 51.54  | 1 |
| -1  | 1  | -5 | 752.61  | 26.03  | 1 |
| -1  | 1  | -5 | 758.61  | 27.41  | 2 |
| -2  | 1  | -5 | 1321.82 | 44.71  | 2 |
| -2  | 1  | -5 | 1311.80 | 41.32  | 1 |
| -3  | 1  | -5 | 113.70  | 7.07   | 1 |
| -3  | 1  | -5 | 85.04   | 7.93   | 2 |
| -4  | 1  | -5 | 195.32  | 13.13  | 2 |
| -4  | 1  | -5 | 207.62  | 10.07  | 1 |
| -5  | 1  | -5 | 7.93    | 2.54   | 1 |
| -5  | 1  | -5 | 7.72    | 4.08   | 2 |
| -6  | 1  | -5 | 43.14   | 8.06   | 2 |
| -7  | 1  | -5 | 564.15  | 28.73  | 2 |
| -8  | 1  | -5 | 109.36  | 13.69  | 2 |
| -9  | 1  | -5 | 45.60   | 9.57   | 2 |
| -10 | 1  | -5 | 28.38   | 8.44   | 2 |
| -11 | 1  | -5 | 24.66   | 9.20   | 2 |
| -12 | 1  | -5 | 13.43   | 7.51   | 2 |
| -13 | 1  | -5 | 18.25   | 8.07   | 2 |
| -14 | 1  | -5 | -2.31   | 6.13   | 2 |
| -17 | 0  | 5  | 38.42   | 13.21  | 3 |
| -16 | 0  | 5  | 26.75   | 11.10  | 3 |
| -15 | 0  | 5  | 129.97  | 18.67  | 3 |
| -14 | 0  | 5  | 241.51  | 22.00  | 3 |

-13 0 5 1.07 5.24 3  
-12 0 5 11.10 6.18 3  
-11 0 5 487.36 28.25 3  
-10 0 5 26.42 7.39 3  
-9 0 5 360.10 17.44 2  
-9 0 5 380.30 22.16 3  
9 0 -5 385.56 17.80 1  
-8 0 5 0.42 3.30 3  
8 0 -5 4.07 3.23 1  
-8 0 5 2.98 2.40 2  
-7 0 5 1737.58 52.22 2  
7 0 -5 1622.85 53.86 1  
-7 0 5 1678.88 58.49 3  
-6 0 5 555.53 24.38 3  
6 0 -5 501.58 21.72 1  
-6 0 5 586.17 19.07 2  
5 0 -5 2.94 2.36 1  
-5 0 5 7.54 3.16 3  
4 0 -5 519.67 20.55 1  
-4 0 5 498.06 21.13 3  
3 0 -5 42.07 5.18 1  
-3 0 5 32.10 4.94 3  
-2 0 5 1729.63 55.50 3  
2 0 -5 1704.87 53.42 1  
2 0 -5 1706.68 50.66 2  
1 0 -5 175.95 9.99 1  
1 0 -5 209.23 9.36 2  
0 0 -5 9.79 2.82 2  
0 0 -5 5.98 2.41 1  
-1 0 -5 1112.38 37.98 2  
-1 0 -5 1112.45 36.12 1  
-2 0 -5 435.33 17.38 1  
-2 0 -5 429.54 19.61 2  
-3 0 -5 363.61 18.37 2  
-3 0 -5 357.01 15.14 1  
-4 0 -5 43.24 4.92 1  
-4 0 -5 42.18 7.29 2  
-5 0 -5 275.73 17.53 2  
-5 0 -5 267.52 12.63 1  
-6 0 -5 28.22 7.04 2  
-7 0 -5 620.20 30.95 2  
-8 0 -5 24.47 6.87 2  
-9 0 -5 13.67 5.60 2  
-10 0 -5 33.60 8.87 2  
-11 0 -5 328.22 24.65 2  
-12 0 -5 70.65 14.66 2

-13 0 -5 -0.79 5.85 2  
-14 0 -5 79.62 17.87 2  
-17 1 5 0.23 6.22 3  
-16 1 5 32.28 11.35 3  
-15 1 5 2.57 6.75 3  
-14 1 5 8.57 7.78 3  
-13 1 5 236.63 20.71 3  
-12 1 5 12.85 6.86 3  
-11 1 5 248.61 19.28 3  
-10 1 5 26.06 7.10 3  
-9 1 5 -3.57 3.44 3  
-9 1 5 4.22 3.15 2  
9 -1 -5 4.91 3.12 1  
-8 1 5 630.24 23.65 2  
8 -1 -5 609.01 24.26 1  
-8 1 5 613.67 28.77 3  
7 -1 -5 2411.57 79.01 1  
-7 1 5 2737.95 78.84 2  
-7 1 5 2729.05 85.34 3  
-6 1 5 544.58 24.42 3  
6 -1 -5 543.26 22.17 1  
-6 1 5 563.33 19.29 2  
5 -1 -5 5.29 2.72 1  
-5 1 5 5.06 2.86 3  
-5 1 5 6.96 1.95 2  
-4 1 5 12.25 3.71 3  
4 -1 -5 12.38 3.41 1  
3 -1 -5 53.25 5.94 1  
-3 1 5 64.16 6.85 3  
2 -1 -5 272.57 13.20 1  
-2 1 5 264.42 14.14 3  
1 -1 -5 34.90 4.81 1  
0 -1 -5 286.01 13.87 2  
0 -1 -5 311.14 14.17 1  
-1 -1 -5 512.72 20.25 1  
-1 -1 -5 498.87 21.24 2  
-2 -1 -5 305.62 14.26 1  
-2 -1 -5 313.37 16.56 2  
-3 -1 -5 1.45 2.54 2  
-3 -1 -5 1.51 2.16 1  
-4 -1 -5 210.64 14.49 2  
-4 -1 -5 195.82 11.05 1  
-5 -1 -5 1266.82 49.73 2  
-5 -1 -5 1312.70 42.35 1  
-6 -1 -5 6.75 4.16 2  
-7 -1 -5 210.02 16.84 2

-8 -1 -5 102.61 14.23 2  
-9 -1 -5 65.04 12.69 2  
-10 -1 -5 -2.71 4.06 2  
-11 -1 -5 10.93 7.12 2  
-12 -1 -5 193.22 22.81 2  
-13 -1 -5 12.82 8.98 2  
-14 -1 -5 24.44 12.02 2  
-17 2 5 3.47 6.38 3  
-16 2 5 91.17 16.99 3  
-15 2 5 -3.05 6.08 3  
-14 2 5 31.50 11.02 3  
-13 2 5 126.90 16.71 3  
-12 2 5 11.60 6.76 3  
-11 2 5 40.10 9.23 3  
-10 2 5 243.68 14.39 2  
-10 2 5 253.08 18.33 3  
9 -2 -5 101.96 8.86 1  
-9 2 5 111.20 8.87 2  
-9 2 5 109.82 12.32 3  
-8 2 5 128.07 11.52 3  
8 -2 -5 162.07 10.65 1  
-8 2 5 153.27 9.55 2  
-7 2 5 20.61 5.66 3  
7 -2 -5 20.44 4.19 1  
-7 2 5 35.63 4.62 2  
-6 2 5 330.34 17.45 3  
6 -2 -5 320.48 15.67 1  
-6 2 5 315.12 13.30 2  
5 -2 -5 1156.09 39.17 1  
-5 2 5 1205.93 36.49 2  
-5 2 5 1083.43 40.76 3  
-4 2 5 517.39 22.56 3  
4 -2 -5 534.93 21.80 1  
-4 2 5 534.97 18.93 2  
-3 2 5 1329.01 46.07 3  
3 -2 -5 1356.08 44.47 1  
2 -2 -5 1.67 1.96 1  
1 -2 -5 324.24 15.37 1  
0 -2 -5 949.79 33.53 1  
-1 -2 -5 894.13 31.85 1  
-2 -2 -5 109.84 8.25 1  
-2 -2 -5 108.12 9.24 2  
-3 -2 -5 781.62 28.83 1  
-3 -2 -5 797.47 33.25 2  
-4 -2 -5 3.90 3.58 2  
-4 -2 -5 10.66 3.82 1



-5 -2 -5 91.07 8.25 1  
-5 -2 -5 77.92 11.59 2  
-6 -2 -5 495.55 27.24 2  
-7 -2 -5 4.88 4.44 2  
-8 -2 -5 235.72 19.26 2  
-9 -2 -5 186.68 20.10 2  
-10 -2 -5 92.03 16.04 2  
-11 -2 -5 70.47 13.66 2  
-12 -2 -5 69.40 13.90 2  
-13 -2 -5 43.39 11.29 2  
-17 3 5 1.80 6.21 3  
-16 3 5 198.41 23.41 3  
-15 3 5 153.97 20.17 3  
-14 3 5 6.96 7.27 3  
-13 3 5 78.01 13.81 3  
-12 3 5 56.44 11.63 3  
-11 3 5 9.70 6.11 3  
-10 3 5 226.88 13.81 2  
-10 3 5 207.27 16.82 3  
-9 3 5 5.79 3.35 2  
-9 3 5 6.08 4.05 3  
9 -3 -5 3.71 3.52 1  
-8 3 5 61.04 6.49 2  
8 -3 -5 61.39 7.07 1  
-8 3 5 35.41 7.18 3  
-7 3 5 340.97 15.29 2  
-7 3 5 344.66 18.88 3  
6 -3 -5 70.57 7.47 1  
-6 3 5 100.77 8.77 3  
-6 3 5 84.71 6.56 2  
5 -3 -5 20.76 4.63 1  
-5 3 5 22.61 3.84 2  
-5 3 5 17.71 4.39 3  
-4 3 5 431.92 17.49 2  
4 -3 -5 440.76 19.65 1  
-4 3 5 433.79 20.44 3  
3 -3 -5 1212.59 41.48 1  
-3 3 5 1202.93 43.43 3  
2 -3 -5 9.49 3.31 1  
1 -3 -5 349.92 16.67 1  
0 -3 -5 174.22 10.99 1  
-1 -3 -5 99.39 8.45 1  
-2 -3 -5 1818.94 58.40 1  
-3 -3 -5 687.00 27.37 1  
-3 -3 -5 723.66 31.76 2  
-4 -3 -5 15.14 5.66 2

|     |    |    |         |       |   |
|-----|----|----|---------|-------|---|
| -4  | -3 | -5 | 14.41   | 4.26  | 1 |
| -5  | -3 | -5 | 56.92   | 10.51 | 2 |
| -5  | -3 | -5 | 57.37   | 7.35  | 1 |
| -6  | -3 | -5 | 739.74  | 36.52 | 2 |
| -7  | -3 | -5 | 27.99   | 8.27  | 2 |
| -8  | -3 | -5 | 183.42  | 19.67 | 2 |
| -9  | -3 | -5 | 160.13  | 19.46 | 2 |
| -10 | -3 | -5 | 296.80  | 24.55 | 2 |
| -11 | -3 | -5 | 8.47    | 6.08  | 2 |
| -12 | -3 | -5 | -3.97   | 6.04  | 2 |
| -13 | -3 | -5 | 83.43   | 17.64 | 2 |
| -18 | 4  | 5  | -3.99   | 6.56  | 3 |
| -17 | 4  | 5  | 11.69   | 8.85  | 3 |
| -16 | 4  | 5  | 41.26   | 13.11 | 3 |
| -15 | 4  | 5  | 2.66    | 7.70  | 3 |
| -14 | 4  | 5  | -2.48   | 6.19  | 3 |
| -13 | 4  | 5  | 25.71   | 9.81  | 3 |
| -12 | 4  | 5  | 211.85  | 18.74 | 3 |
| -11 | 4  | 5  | 22.74   | 7.69  | 3 |
| -10 | 4  | 5  | 139.41  | 14.20 | 3 |
| 10  | -4 | -5 | 168.65  | 11.19 | 1 |
| -10 | 4  | 5  | 137.77  | 11.18 | 2 |
| -9  | 4  | 5  | 1449.66 | 50.00 | 2 |
| -9  | 4  | 5  | 1437.03 | 54.64 | 3 |
| 9   | -4 | -5 | 1464.62 | 48.64 | 1 |
| 8   | -4 | -5 | 3.25    | 2.83  | 1 |
| -8  | 4  | 5  | -0.44   | 3.00  | 3 |
| -8  | 4  | 5  | 4.61    | 3.27  | 2 |
| -7  | 4  | 5  | 995.50  | 32.96 | 2 |
| 7   | -4 | -5 | 740.59  | 32.16 | 1 |
| -7  | 4  | 5  | 994.72  | 37.12 | 3 |
| 6   | -4 | -5 | 143.20  | 10.53 | 1 |
| -6  | 4  | 5  | 147.39  | 9.29  | 2 |
| -6  | 4  | 5  | 113.79  | 10.35 | 3 |
| -5  | 4  | 5  | 36.81   | 5.31  | 2 |
| -5  | 4  | 5  | 45.68   | 6.88  | 3 |
| 5   | -4 | -5 | 38.92   | 6.34  | 1 |
| 4   | -4 | -5 | 1661.93 | 53.56 | 1 |
| -4  | 4  | 5  | 1545.42 | 54.73 | 3 |
| 3   | -4 | -5 | 862.46  | 32.29 | 1 |
| 2   | -4 | -5 | 0.50    | 2.79  | 1 |
| 1   | -4 | -5 | 294.89  | 15.57 | 1 |
| 0   | -4 | -5 | 122.55  | 9.44  | 1 |
| -1  | -4 | -5 | 739.49  | 29.08 | 1 |
| -2  | -4 | -5 | 163.86  | 11.29 | 1 |
| -3  | -4 | -5 | 214.85  | 13.42 | 1 |

|     |    |    |        |       |   |
|-----|----|----|--------|-------|---|
| -4  | -4 | -5 | 508.08 | 26.87 | 2 |
| -4  | -4 | -5 | 466.25 | 21.91 | 1 |
| -5  | -4 | -5 | 90.81  | 12.83 | 2 |
| -5  | -4 | -5 | 98.27  | 9.73  | 1 |
| -6  | -4 | -5 | 840.08 | 40.84 | 2 |
| -7  | -4 | -5 | -2.35  | 2.94  | 2 |
| -8  | -4 | -5 | 4.34   | 5.05  | 2 |
| -9  | -4 | -5 | 65.90  | 13.26 | 2 |
| -10 | -4 | -5 | 1.28   | 6.15  | 2 |
| -11 | -4 | -5 | 37.95  | 10.74 | 2 |
| -12 | -4 | -5 | 2.54   | 8.89  | 2 |
| -13 | -4 | -5 | -2.38  | 8.07  | 2 |
| -18 | 5  | 5  | 5.35   | 7.16  | 3 |
| -17 | 5  | 5  | 41.71  | 12.71 | 3 |
| -16 | 5  | 5  | 14.53  | 9.24  | 3 |
| -15 | 5  | 5  | 6.19   | 7.38  | 3 |
| -14 | 5  | 5  | 122.49 | 17.44 | 3 |
| -13 | 5  | 5  | 48.68  | 11.05 | 3 |
| -12 | 5  | 5  | 8.23   | 6.30  | 3 |
| -11 | 5  | 5  | 59.49  | 11.10 | 3 |
| 10  | -5 | -5 | 340.18 | 17.35 | 1 |
| -10 | 5  | 5  | 338.02 | 21.38 | 3 |
| -10 | 5  | 5  | 314.26 | 18.15 | 2 |
| 9   | -5 | -5 | 70.98  | 7.87  | 1 |
| -9  | 5  | 5  | 69.83  | 10.05 | 3 |
| -9  | 5  | 5  | 52.98  | 7.53  | 2 |
| -8  | 5  | 5  | 4.83   | 3.77  | 3 |
| -8  | 5  | 5  | 11.40  | 4.30  | 2 |
| 8   | -5 | -5 | 3.04   | 2.87  | 1 |
| 7   | -5 | -5 | 45.35  | 7.04  | 1 |
| -7  | 5  | 5  | 51.29  | 6.68  | 2 |
| -7  | 5  | 5  | 36.83  | 7.30  | 3 |
| -6  | 5  | 5  | 424.77 | 21.49 | 3 |
| 6   | -5 | -5 | 443.45 | 20.66 | 1 |
| -6  | 5  | 5  | 417.48 | 19.29 | 2 |
| -5  | 5  | 5  | 544.82 | 24.77 | 3 |
| -5  | 5  | 5  | 501.92 | 22.16 | 2 |
| 5   | -5 | -5 | 528.22 | 23.42 | 1 |
| 4   | -5 | -5 | -1.21  | 2.38  | 1 |
| -4  | 5  | 5  | -1.37  | 3.15  | 3 |
| 3   | -5 | -5 | 5.71   | 3.34  | 1 |
| 2   | -5 | -5 | 178.50 | 11.91 | 1 |
| 1   | -5 | -5 | 6.78   | 3.67  | 1 |
| 0   | -5 | -5 | 316.30 | 17.36 | 1 |
| -1  | -5 | -5 | 225.71 | 14.52 | 1 |
| -2  | -5 | -5 | 266.90 | 16.26 | 1 |

|     |    |    |        |       |   |
|-----|----|----|--------|-------|---|
| -3  | -5 | -5 | 15.84  | 5.30  | 1 |
| -4  | -5 | -5 | -1.15  | 3.66  | 2 |
| -4  | -5 | -5 | 2.45   | 3.94  | 1 |
| -5  | -5 | -5 | 1.33   | 3.41  | 2 |
| -5  | -5 | -5 | 7.14   | 4.77  | 1 |
| -6  | -5 | -5 | 1.68   | 4.48  | 2 |
| -7  | -5 | -5 | 268.68 | 22.42 | 2 |
| -8  | -5 | -5 | 166.61 | 20.45 | 2 |
| -9  | -5 | -5 | -2.54  | 4.98  | 2 |
| -10 | -5 | -5 | 1.50   | 6.13  | 2 |
| -11 | -5 | -5 | 16.97  | 8.85  | 2 |
| -12 | -5 | -5 | 70.26  | 17.12 | 2 |
| -18 | 6  | 5  | 6.14   | 6.41  | 3 |
| -17 | 6  | 5  | 4.98   | 7.68  | 3 |
| -16 | 6  | 5  | 0.83   | 6.27  | 3 |
| -15 | 6  | 5  | 0.74   | 6.40  | 3 |
| -14 | 6  | 5  | 151.68 | 18.53 | 3 |
| -13 | 6  | 5  | 362.56 | 25.70 | 3 |
| -12 | 6  | 5  | 8.03   | 6.16  | 3 |
| -11 | 6  | 5  | 28.79  | 8.09  | 3 |
| -11 | 6  | 5  | 25.78  | 6.80  | 2 |
| 10  | -6 | -5 | 6.54   | 3.86  | 1 |
| -10 | 6  | 5  | 4.75   | 4.35  | 3 |
| -10 | 6  | 5  | -1.46  | 3.60  | 2 |
| -9  | 6  | 5  | 135.72 | 13.25 | 3 |
| -9  | 6  | 5  | 134.91 | 11.14 | 2 |
| 9   | -6 | -5 | 136.35 | 11.11 | 1 |
| -8  | 6  | 5  | 131.18 | 10.52 | 2 |
| -8  | 6  | 5  | 111.30 | 11.79 | 3 |
| 7   | -6 | -5 | 4.32   | 3.37  | 1 |
| -7  | 6  | 5  | 10.25  | 4.92  | 3 |
| -7  | 6  | 5  | 2.85   | 3.02  | 2 |
| -6  | 6  | 5  | 1.51   | 3.83  | 3 |
| 6   | -6 | -5 | 4.75   | 3.62  | 1 |
| -6  | 6  | 5  | 0.49   | 2.94  | 2 |
| -5  | 6  | 5  | 1.12   | 3.38  | 3 |
| 5   | -6 | -5 | 0.24   | 2.97  | 1 |
| -5  | 6  | 5  | 3.08   | 2.75  | 2 |
| 4   | -6 | -5 | 67.97  | 8.60  | 1 |
| 3   | -6 | -5 | 6.63   | 3.95  | 1 |
| 2   | -6 | -5 | 106.81 | 10.78 | 1 |
| 1   | -6 | -5 | 22.26  | 6.11  | 1 |
| 0   | -6 | -5 | 312.44 | 18.26 | 1 |
| -1  | -6 | -5 | 463.67 | 23.10 | 1 |
| -2  | -6 | -5 | 131.72 | 12.36 | 1 |
| -3  | -6 | -5 | 178.38 | 13.74 | 1 |

|     |    |    |        |       |   |
|-----|----|----|--------|-------|---|
| -4  | -6 | -5 | 141.54 | 13.18 | 1 |
| -5  | -6 | -5 | 55.30  | 9.60  | 1 |
| -5  | -6 | -5 | 61.64  | 11.77 | 2 |
| -6  | -6 | -5 | 48.41  | 10.10 | 2 |
| -7  | -6 | -5 | 339.74 | 25.61 | 2 |
| -8  | -6 | -5 | 7.74   | 5.86  | 2 |
| -9  | -6 | -5 | 34.33  | 10.29 | 2 |
| -10 | -6 | -5 | 25.30  | 9.42  | 2 |
| -11 | -6 | -5 | 24.36  | 10.92 | 2 |
| -12 | -6 | -5 | -2.17  | 9.08  | 2 |
| -17 | 7  | 5  | 25.31  | 11.56 | 3 |
| -16 | 7  | 5  | -0.87  | 8.03  | 3 |
| -15 | 7  | 5  | 6.59   | 7.95  | 3 |
| -14 | 7  | 5  | 81.91  | 14.94 | 3 |
| -13 | 7  | 5  | 33.31  | 9.86  | 3 |
| -12 | 7  | 5  | 4.63   | 6.02  | 3 |
| -11 | 7  | 5  | 24.85  | 7.88  | 3 |
| -11 | 7  | 5  | 40.46  | 8.37  | 2 |
| 10  | -7 | -5 | 1.21   | 3.94  | 1 |
| -10 | 7  | 5  | 1.23   | 4.64  | 3 |
| -10 | 7  | 5  | 1.39   | 3.92  | 2 |
| 9   | -7 | -5 | 170.98 | 13.07 | 1 |
| -9  | 7  | 5  | 210.45 | 14.49 | 2 |
| -9  | 7  | 5  | 194.55 | 15.38 | 3 |
| -8  | 7  | 5  | 191.93 | 14.05 | 2 |
| 8   | -7 | -5 | 205.55 | 14.16 | 1 |
| -8  | 7  | 5  | 204.60 | 15.40 | 3 |
| -7  | 7  | 5  | 174.75 | 12.83 | 2 |
| 7   | -7 | -5 | 166.10 | 12.88 | 1 |
| -7  | 7  | 5  | 159.47 | 13.42 | 3 |
| 6   | -7 | -5 | 279.08 | 16.43 | 1 |
| -6  | 7  | 5  | 264.30 | 16.12 | 2 |
| -6  | 7  | 5  | 244.28 | 16.73 | 3 |
| 5   | -7 | -5 | 8.08   | 4.58  | 1 |
| -5  | 7  | 5  | 20.71  | 6.83  | 3 |
| -5  | 7  | 5  | 20.18  | 5.67  | 2 |
| 4   | -7 | -5 | 209.36 | 14.63 | 1 |
| 3   | -7 | -5 | 488.37 | 24.13 | 1 |
| 2   | -7 | -5 | 18.95  | 6.01  | 1 |
| 1   | -7 | -5 | 295.51 | 18.07 | 1 |
| 0   | -7 | -5 | 2.64   | 4.04  | 1 |
| -1  | -7 | -5 | 2.34   | 4.50  | 1 |
| -2  | -7 | -5 | 6.10   | 5.26  | 1 |
| -3  | -7 | -5 | 2.20   | 4.97  | 1 |
| -4  | -7 | -5 | 234.18 | 17.08 | 1 |
| -5  | -7 | -5 | 53.27  | 11.26 | 2 |

-5 -7 -5 79.78 10.92 1  
-6 -7 -5 26.64 7.91 2  
-7 -7 -5 28.92 9.50 2  
-8 -7 -5 135.27 20.50 2  
-9 -7 -5 7.58 6.99 2  
-10 -7 -5 124.68 21.45 2  
-11 -7 -5 0.14 8.43 2  
-17 8 5 -6.83 7.41 3  
-16 8 5 8.11 8.08 3  
-15 8 5 84.57 16.05 3  
-14 8 5 4.79 7.52 3  
-13 8 5 26.63 9.33 3  
-12 8 5 70.14 12.12 3  
-11 8 5 4.45 4.68 2  
-11 8 5 3.53 5.24 3  
-10 8 5 126.74 14.12 3  
10 -8 -5 135.60 12.31 1  
-10 8 5 153.27 13.38 2  
-9 8 5 114.68 12.39 2  
-9 8 5 126.02 13.32 3  
8 -8 -5 59.01 8.97 1  
-8 8 5 59.90 9.62 3  
-8 8 5 50.06 8.64 2  
-7 8 5 4.78 4.29 2  
7 -8 -5 11.43 4.99 1  
-7 8 5 15.12 6.44 3  
6 -8 -5 -2.76 3.05 1  
-6 8 5 6.37 5.55 3  
-6 8 5 -1.53 3.37 2  
-5 8 5 5.39 4.48 2  
5 -8 -5 7.36 3.97 1  
4 -8 -5 175.19 14.10 1  
3 -8 -5 119.96 12.62 1  
2 -8 -5 95.12 11.49 1  
1 -8 -5 -2.75 3.88 1  
0 -8 -5 167.56 14.04 1  
-1 -8 -5 -0.37 3.88 1  
-2 -8 -5 0.64 3.84 1  
-3 -8 -5 134.91 13.95 1  
-4 -8 -5 115.92 13.69 1  
-5 -8 -5 11.13 6.10 1  
-6 -8 -5 6.03 5.93 2  
-7 -8 -5 18.19 8.56 2  
-8 -8 -5 77.29 16.36 2  
-9 -8 -5 81.80 17.38 2  
-10 -8 -5 127.79 21.48 2

|     |    |    |        |       |   |
|-----|----|----|--------|-------|---|
| -17 | 9  | 5  | 5.58   | 8.78  | 3 |
| -16 | 9  | 5  | 16.68  | 9.66  | 3 |
| -15 | 9  | 5  | 23.93  | 10.95 | 3 |
| -14 | 9  | 5  | 107.34 | 16.46 | 3 |
| -13 | 9  | 5  | 44.48  | 10.83 | 3 |
| -12 | 9  | 5  | 254.27 | 20.47 | 3 |
| -11 | 9  | 5  | 91.09  | 13.37 | 3 |
| -11 | 9  | 5  | 93.10  | 12.16 | 2 |
| -10 | 9  | 5  | 130.08 | 14.38 | 3 |
| 10  | -9 | -5 | 102.16 | 11.62 | 1 |
| -10 | 9  | 5  | 109.17 | 12.98 | 2 |
| 9   | -9 | -5 | 346.41 | 20.13 | 1 |
| -9  | 9  | 5  | 344.97 | 21.23 | 2 |
| -9  | 9  | 5  | 344.15 | 21.57 | 3 |
| -8  | 9  | 5  | 157.05 | 13.85 | 2 |
| 8   | -9 | -5 | 155.04 | 13.16 | 1 |
| -8  | 9  | 5  | 150.97 | 15.01 | 3 |
| -7  | 9  | 5  | 215.96 | 16.18 | 2 |
| 7   | -9 | -5 | 180.39 | 14.30 | 1 |
| -7  | 9  | 5  | 205.44 | 16.46 | 3 |
| 6   | -9 | -5 | 310.28 | 18.66 | 1 |
| -6  | 9  | 5  | 286.35 | 18.83 | 2 |
| -6  | 9  | 5  | 278.98 | 19.74 | 3 |
| 5   | -9 | -5 | 83.70  | 11.25 | 1 |
| 4   | -9 | -5 | 23.99  | 7.15  | 1 |
| 3   | -9 | -5 | 141.84 | 14.06 | 1 |
| 2   | -9 | -5 | 62.66  | 10.06 | 1 |
| 1   | -9 | -5 | 19.39  | 6.61  | 1 |
| 0   | -9 | -5 | 359.20 | 21.85 | 1 |
| -1  | -9 | -5 | 278.61 | 19.20 | 1 |
| -2  | -9 | -5 | 106.74 | 13.22 | 1 |
| -3  | -9 | -5 | 21.54  | 7.46  | 1 |
| -4  | -9 | -5 | 104.47 | 13.91 | 1 |
| -5  | -9 | -5 | -2.14  | 4.71  | 1 |
| -6  | -9 | -5 | 1.54   | 6.73  | 2 |
| -7  | -9 | -5 | 9.44   | 6.30  | 2 |
| -8  | -9 | -5 | 9.86   | 8.74  | 2 |
| -9  | -9 | -5 | 30.04  | 12.43 | 2 |
| -10 | -9 | -5 | 11.09  | 10.20 | 2 |
| -17 | 10 | 5  | 68.64  | 15.93 | 3 |
| -16 | 10 | 5  | 0.63   | 8.00  | 3 |
| -15 | 10 | 5  | 2.05   | 8.13  | 3 |
| -14 | 10 | 5  | 36.36  | 11.26 | 3 |
| -13 | 10 | 5  | 97.58  | 15.04 | 3 |
| -12 | 10 | 5  | 91.22  | 14.65 | 3 |
| -11 | 10 | 5  | 13.10  | 6.50  | 2 |

|     |     |    |         |       |   |
|-----|-----|----|---------|-------|---|
| -11 | 10  | 5  | 7.49    | 6.48  | 3 |
| -10 | 10  | 5  | 123.64  | 14.63 | 3 |
| -10 | 10  | 5  | 124.89  | 14.08 | 2 |
| -9  | 10  | 5  | 47.75   | 9.50  | 2 |
| -9  | 10  | 5  | 41.98   | 9.71  | 3 |
| 9   | -10 | -5 | 34.45   | 7.74  | 1 |
| 8   | -10 | -5 | 2.00    | 3.91  | 1 |
| -8  | 10  | 5  | 4.71    | 5.79  | 3 |
| -8  | 10  | 5  | 3.45    | 4.24  | 2 |
| -7  | 10  | 5  | 56.37   | 10.47 | 2 |
| -7  | 10  | 5  | 82.68   | 12.39 | 3 |
| 7   | -10 | -5 | 73.78   | 10.62 | 1 |
| 6   | -10 | -5 | 248.15  | 17.84 | 1 |
| -6  | 10  | 5  | 226.73  | 17.79 | 2 |
| 5   | -10 | -5 | 1196.82 | 47.86 | 1 |
| 4   | -10 | -5 | 24.30   | 7.71  | 1 |
| 3   | -10 | -5 | 2.54    | 5.67  | 1 |
| 2   | -10 | -5 | 265.75  | 18.82 | 1 |
| 1   | -10 | -5 | -2.10   | 3.90  | 1 |
| 0   | -10 | -5 | 65.28   | 10.83 | 1 |
| -1  | -10 | -5 | 26.23   | 8.27  | 1 |
| -2  | -10 | -5 | 11.75   | 6.79  | 1 |
| -3  | -10 | -5 | 36.25   | 9.05  | 1 |
| -4  | -10 | -5 | 0.90    | 6.26  | 1 |
| -5  | -10 | -5 | 37.65   | 10.34 | 1 |
| -6  | -10 | -5 | -5.67   | 4.83  | 2 |
| -7  | -10 | -5 | 43.88   | 12.97 | 2 |
| -8  | -10 | -5 | 123.69  | 22.58 | 2 |
| -9  | -10 | -5 | 24.35   | 12.97 | 2 |
| -15 | 11  | 5  | 71.94   | 15.06 | 3 |
| -14 | 11  | 5  | 283.01  | 24.33 | 3 |
| -13 | 11  | 5  | 2.70    | 7.34  | 3 |
| -12 | 11  | 5  | 28.29   | 9.71  | 3 |
| -11 | 11  | 5  | 560.51  | 30.87 | 2 |
| -11 | 11  | 5  | 576.34  | 32.15 | 3 |
| -10 | 11  | 5  | 50.44   | 10.34 | 2 |
| 10  | -11 | -5 | 49.23   | 9.75  | 1 |
| -10 | 11  | 5  | 44.17   | 10.47 | 3 |
| 9   | -11 | -5 | 77.69   | 11.36 | 1 |
| -9  | 11  | 5  | 89.82   | 12.91 | 2 |
| -9  | 11  | 5  | 58.36   | 11.51 | 3 |
| 8   | -11 | -5 | 46.63   | 10.04 | 1 |
| -8  | 11  | 5  | 50.40   | 10.83 | 2 |
| 7   | -11 | -5 | 54.59   | 10.36 | 1 |
| -7  | 11  | 5  | 66.56   | 11.59 | 2 |
| -6  | 11  | 5  | 159.38  | 16.76 | 2 |



|     |     |    |        |       |   |
|-----|-----|----|--------|-------|---|
| 6   | -11 | -5 | 168.50 | 16.52 | 1 |
| 5   | -11 | -5 | 26.25  | 8.42  | 1 |
| 4   | -11 | -5 | 1.07   | 5.54  | 1 |
| 3   | -11 | -5 | 5.04   | 6.21  | 1 |
| 2   | -11 | -5 | 41.70  | 9.48  | 1 |
| 1   | -11 | -5 | 11.22  | 6.11  | 1 |
| 0   | -11 | -5 | 28.83  | 8.11  | 1 |
| -1  | -11 | -5 | 237.40 | 19.48 | 1 |
| -2  | -11 | -5 | 255.79 | 20.29 | 1 |
| -3  | -11 | -5 | 48.72  | 11.42 | 1 |
| -4  | -11 | -5 | 61.93  | 12.06 | 1 |
| -5  | -11 | -5 | 15.23  | 8.94  | 1 |
| -7  | -11 | -5 | 19.24  | 11.33 | 2 |
| -8  | -11 | -5 | 9.35   | 11.52 | 2 |
| -12 | 12  | 5  | 3.63   | 5.68  | 2 |
| -11 | 12  | 5  | 112.97 | 15.47 | 2 |
| -10 | 12  | 5  | 32.03  | 8.74  | 2 |
| 10  | -12 | -5 | 19.98  | 7.85  | 1 |
| -9  | 12  | 5  | 53.12  | 11.30 | 2 |
| 9   | -12 | -5 | 31.69  | 8.46  | 1 |
| 8   | -12 | -5 | 213.47 | 17.30 | 1 |
| -8  | 12  | 5  | 155.44 | 17.50 | 2 |
| -7  | 12  | 5  | 579.48 | 32.46 | 2 |
| 7   | -12 | -5 | 572.46 | 30.47 | 1 |
| 6   | -12 | -5 | 41.98  | 11.19 | 1 |
| 5   | -12 | -5 | 3.83   | 6.96  | 1 |
| 4   | -12 | -5 | 50.73  | 11.06 | 1 |
| 3   | -12 | -5 | 41.83  | 10.74 | 1 |
| 2   | -12 | -5 | 383.54 | 25.05 | 1 |
| 1   | -12 | -5 | 39.86  | 10.01 | 1 |
| 0   | -12 | -5 | 91.91  | 14.33 | 1 |
| -1  | -12 | -5 | 38.97  | 10.13 | 1 |
| -2  | -12 | -5 | -1.09  | 6.22  | 1 |
| -3  | -12 | -5 | 44.24  | 11.22 | 1 |
| -4  | -12 | -5 | -7.82  | 6.28  | 1 |
| -5  | -12 | -5 | 150.59 | 18.81 | 1 |
| -7  | -12 | -5 | 1.03   | 10.40 | 2 |
| -12 | 13  | 5  | 6.69   | 6.32  | 2 |
| -11 | 13  | 5  | 111.85 | 16.08 | 2 |
| 10  | -13 | -5 | 108.89 | 14.25 | 1 |
| -10 | 13  | 5  | 91.36  | 15.05 | 2 |
| 9   | -13 | -5 | 75.14  | 12.87 | 1 |
| -9  | 13  | 5  | 61.27  | 12.07 | 2 |
| -8  | 13  | 5  | 127.58 | 16.89 | 2 |
| 8   | -13 | -5 | 127.62 | 15.21 | 1 |
| 7   | -13 | -5 | -0.62  | 6.01  | 1 |

|     |     |    |        |       |   |
|-----|-----|----|--------|-------|---|
| 6   | -13 | -5 | 181.69 | 18.79 | 1 |
| 5   | -13 | -5 | 4.68   | 6.80  | 1 |
| 4   | -13 | -5 | 214.95 | 20.63 | 1 |
| 3   | -13 | -5 | 14.21  | 8.12  | 1 |
| 2   | -13 | -5 | 5.89   | 5.66  | 1 |
| 1   | -13 | -5 | 376.60 | 26.14 | 1 |
| 0   | -13 | -5 | 114.28 | 16.48 | 1 |
| -1  | -13 | -5 | 25.73  | 8.97  | 1 |
| -2  | -13 | -5 | 12.06  | 8.38  | 1 |
| -3  | -13 | -5 | -16.62 | 6.00  | 1 |
| -4  | -13 | -5 | -6.95  | 6.78  | 1 |
| -5  | -13 | -5 | 45.22  | 12.36 | 1 |
| -12 | 14  | 5  | 40.97  | 11.46 | 2 |
| -11 | 14  | 5  | 10.93  | 8.13  | 2 |
| 10  | -14 | -5 | 111.46 | 15.18 | 1 |
| -10 | 14  | 5  | 127.83 | 17.81 | 2 |
| 9   | -14 | -5 | 41.99  | 10.86 | 1 |
| -9  | 14  | 5  | 74.60  | 13.97 | 2 |
| -8  | 14  | 5  | 34.60  | 10.30 | 2 |
| 8   | -14 | -5 | 26.43  | 9.49  | 1 |
| 7   | -14 | -5 | 283.93 | 22.54 | 1 |
| 6   | -14 | -5 | 2.99   | 7.46  | 1 |
| 5   | -14 | -5 | 211.36 | 21.19 | 1 |
| 4   | -14 | -5 | 121.40 | 17.75 | 1 |
| 3   | -14 | -5 | 43.14  | 12.88 | 1 |
| 2   | -14 | -5 | 6.02   | 7.23  | 1 |
| 1   | -14 | -5 | -4.49  | 6.99  | 1 |
| 0   | -14 | -5 | 36.30  | 11.54 | 1 |
| -1  | -14 | -5 | 23.36  | 9.44  | 1 |
| -2  | -14 | -5 | 212.31 | 22.47 | 1 |
| -3  | -14 | -5 | 214.58 | 22.78 | 1 |
| -4  | -14 | -5 | -1.95  | 8.65  | 1 |
| -12 | 15  | 5  | -4.05  | 6.17  | 2 |
| -11 | 15  | 5  | 2.23   | 6.70  | 2 |
| 10  | -15 | -5 | 5.10   | 7.71  | 1 |
| -10 | 15  | 5  | 8.62   | 7.81  | 2 |
| -9  | 15  | 5  | 53.37  | 13.71 | 2 |
| 9   | -15 | -5 | 80.70  | 14.20 | 1 |
| 8   | -15 | -5 | 10.43  | 8.63  | 1 |
| 7   | -15 | -5 | 138.62 | 18.71 | 1 |
| 6   | -15 | -5 | 66.46  | 14.25 | 1 |
| 5   | -15 | -5 | 14.23  | 9.56  | 1 |
| 4   | -15 | -5 | 64.59  | 15.15 | 1 |
| 3   | -15 | -5 | 245.28 | 25.08 | 1 |
| 2   | -15 | -5 | -6.68  | 6.41  | 1 |
| 1   | -15 | -5 | 6.25   | 7.44  | 1 |

|     |     |    |        |       |   |
|-----|-----|----|--------|-------|---|
| 0   | -15 | -5 | 73.21  | 14.79 | 1 |
| -1  | -15 | -5 | -5.88  | 7.62  | 1 |
| -2  | -15 | -5 | 47.25  | 13.08 | 1 |
| -3  | -15 | -5 | 0.35   | 9.98  | 1 |
| -4  | -15 | -5 | 15.10  | 11.90 | 1 |
| -12 | 16  | 5  | 152.12 | 21.34 | 2 |
| -11 | 16  | 5  | 82.95  | 15.77 | 2 |
| 10  | -16 | -5 | 11.64  | 9.77  | 1 |
| -10 | 16  | 5  | 22.77  | 10.08 | 2 |
| 9   | -16 | -5 | 82.32  | 15.30 | 1 |
| 8   | -16 | -5 | -1.20  | 7.69  | 1 |
| 7   | -16 | -5 | 98.92  | 16.91 | 1 |
| 6   | -16 | -5 | 6.86   | 9.52  | 1 |
| 5   | -16 | -5 | 96.44  | 17.04 | 1 |
| 4   | -16 | -5 | 4.25   | 9.01  | 1 |
| 3   | -16 | -5 | 9.25   | 10.71 | 1 |
| 2   | -16 | -5 | 51.59  | 13.56 | 1 |
| 1   | -16 | -5 | 10.91  | 9.36  | 1 |
| 0   | -16 | -5 | 74.47  | 15.64 | 1 |
| -1  | -16 | -5 | 26.98  | 13.11 | 1 |
| -2  | -16 | -5 | -18.55 | 9.55  | 1 |
| -12 | 17  | 5  | 2.56   | 9.19  | 2 |
| -11 | 17  | 5  | 38.01  | 13.30 | 2 |
| 10  | -17 | -5 | 18.66  | 10.70 | 1 |
| -10 | 17  | 5  | 36.85  | 12.50 | 2 |
| 9   | -17 | -5 | -3.61  | 8.47  | 1 |
| 8   | -17 | -5 | 24.84  | 11.19 | 1 |
| 7   | -17 | -5 | 30.15  | 12.28 | 1 |
| 6   | -17 | -5 | 55.74  | 14.73 | 1 |
| 5   | -17 | -5 | 27.07  | 12.14 | 1 |
| 4   | -17 | -5 | -1.31  | 8.52  | 1 |
| 3   | -17 | -5 | -11.87 | 7.83  | 1 |
| 2   | -17 | -5 | 40.52  | 12.97 | 1 |
| 1   | -17 | -5 | -3.60  | 10.05 | 1 |
| 0   | -17 | -5 | -3.21  | 10.94 | 1 |
| 10  | -18 | -5 | 3.60   | 9.29  | 1 |
| 9   | -18 | -5 | -3.66  | 8.85  | 1 |
| 8   | -18 | -5 | 6.66   | 9.97  | 1 |
| 7   | -18 | -5 | 11.32  | 9.60  | 1 |
| 6   | -18 | -5 | 0.21   | 8.65  | 1 |
| 5   | -18 | -5 | -12.98 | 7.60  | 1 |
| 4   | -18 | -5 | -6.98  | 7.83  | 1 |
| 3   | -18 | -5 | -2.74  | 8.01  | 1 |
| 2   | -18 | -5 | 10.23  | 10.88 | 1 |
| 0   | -20 | 6  | -7.42  | 6.42  | 4 |
| 0   | -20 | 6  | 5.06   | 6.38  | 1 |

|    |     |    |        |       |   |
|----|-----|----|--------|-------|---|
| 1  | -20 | 6  | 0.77   | 6.81  | 1 |
| 1  | -20 | 6  | 3.84   | 7.17  | 4 |
| 2  | -20 | 6  | 10.39  | 8.07  | 4 |
| 2  | -20 | 6  | 10.16  | 7.44  | 1 |
| 3  | -20 | 6  | 51.05  | 12.62 | 4 |
| 3  | -20 | 6  | 54.57  | 12.88 | 1 |
| 4  | -20 | 6  | -0.81  | 8.47  | 1 |
| -4 | 20  | -6 | -2.41  | 7.68  | 2 |
| 4  | -20 | 6  | -6.62  | 8.51  | 4 |
| 5  | -20 | 6  | 8.27   | 9.58  | 1 |
| 5  | -20 | 6  | 9.74   | 9.62  | 4 |
| -5 | 20  | -6 | -4.81  | 6.97  | 2 |
| -6 | 20  | -6 | -3.36  | 6.67  | 2 |
| 6  | -20 | 6  | 32.38  | 12.20 | 1 |
| 6  | -20 | 6  | 7.40   | 10.37 | 4 |
| -7 | 20  | -6 | -2.77  | 6.97  | 2 |
| -3 | -19 | 6  | 4.17   | 11.86 | 1 |
| -3 | -19 | 6  | 11.05  | 9.36  | 4 |
| -2 | -19 | 6  | 14.26  | 9.49  | 4 |
| -2 | -19 | 6  | 40.96  | 13.78 | 1 |
| -1 | -19 | 6  | 1.81   | 7.29  | 1 |
| -1 | -19 | 6  | -10.50 | 6.75  | 4 |
| 0  | -19 | 6  | 7.72   | 8.48  | 1 |
| 0  | -19 | 6  | -16.15 | 6.53  | 4 |
| 1  | -19 | 6  | 58.76  | 12.83 | 4 |
| 1  | -19 | 6  | 69.63  | 14.40 | 1 |
| 2  | -19 | 6  | -5.15  | 7.53  | 4 |
| 2  | -19 | 6  | 3.14   | 7.93  | 1 |
| -2 | 19  | -6 | 11.72  | 8.76  | 2 |
| 3  | -19 | 6  | 35.47  | 12.10 | 1 |
| 3  | -19 | 6  | 26.43  | 10.62 | 4 |
| -3 | 19  | -6 | 41.49  | 12.92 | 2 |
| 4  | -19 | 6  | 21.64  | 10.78 | 4 |
| 4  | -19 | 6  | 29.37  | 10.52 | 1 |
| -4 | 19  | -6 | 7.48   | 8.23  | 2 |
| 5  | -19 | 6  | 7.71   | 8.79  | 1 |
| 5  | -19 | 6  | 32.65  | 11.62 | 4 |
| -5 | 19  | -6 | 28.05  | 12.13 | 2 |
| 6  | -19 | 6  | 83.65  | 15.42 | 1 |
| 6  | -19 | 6  | 115.13 | 17.79 | 4 |
| -7 | 19  | -6 | 4.36   | 7.53  | 2 |
| -8 | 19  | -6 | -6.44  | 5.51  | 2 |
| -9 | 19  | -6 | -1.49  | 5.79  | 2 |
| -5 | -18 | 6  | 151.27 | 23.63 | 1 |
| -5 | -18 | 6  | 147.50 | 22.84 | 4 |
| -4 | -18 | 6  | 10.08  | 11.99 | 1 |

|     |     |    |        |       |   |
|-----|-----|----|--------|-------|---|
| -4  | -18 | 6  | 8.85   | 9.47  | 4 |
| -3  | -18 | 6  | 8.94   | 10.96 | 1 |
| -3  | -18 | 6  | 15.32  | 8.73  | 4 |
| -2  | -18 | 6  | 35.41  | 13.00 | 1 |
| -2  | -18 | 6  | 38.58  | 10.25 | 4 |
| -1  | -18 | 6  | 10.33  | 8.91  | 4 |
| -1  | -18 | 6  | -3.89  | 8.10  | 1 |
| 0   | -18 | 6  | 79.71  | 15.60 | 1 |
| 0   | -18 | 6  | 57.61  | 13.44 | 4 |
| 1   | -18 | 6  | 9.66   | 8.60  | 4 |
| 1   | -18 | 6  | 13.35  | 9.06  | 1 |
| 2   | -18 | 6  | 67.51  | 14.11 | 1 |
| 2   | -18 | 6  | 82.94  | 14.41 | 4 |
| -2  | 18  | -6 | 63.56  | 15.10 | 2 |
| -3  | 18  | -6 | 11.74  | 9.56  | 2 |
| 3   | -18 | 6  | -2.87  | 7.53  | 1 |
| 3   | -18 | 6  | -0.31  | 7.29  | 4 |
| 4   | -18 | 6  | 67.03  | 13.97 | 1 |
| 4   | -18 | 6  | 84.99  | 14.92 | 4 |
| -4  | 18  | -6 | 69.89  | 14.82 | 2 |
| 5   | -18 | 6  | 13.37  | 8.39  | 4 |
| -5  | 18  | -6 | 24.34  | 10.91 | 2 |
| 5   | -18 | 6  | 17.14  | 8.68  | 1 |
| 6   | -18 | 6  | 1.92   | 8.10  | 1 |
| 6   | -18 | 6  | 10.17  | 8.78  | 4 |
| -6  | 18  | -6 | 6.69   | 8.31  | 2 |
| -7  | 18  | -6 | 333.06 | 28.41 | 2 |
| -9  | 18  | -6 | 1.83   | 6.98  | 2 |
| -10 | 18  | -6 | 6.51   | 8.79  | 2 |
| -6  | -17 | 6  | -6.25  | 8.71  | 4 |
| -6  | -17 | 6  | -4.25  | 12.01 | 1 |
| -5  | -17 | 6  | 27.89  | 13.29 | 1 |
| -5  | -17 | 6  | 21.77  | 10.39 | 4 |
| -4  | -17 | 6  | 25.15  | 10.25 | 4 |
| -4  | -17 | 6  | 37.42  | 12.29 | 1 |
| -3  | -17 | 6  | -1.13  | 6.34  | 4 |
| -3  | -17 | 6  | 12.08  | 8.35  | 1 |
| -2  | -17 | 6  | 37.38  | 11.07 | 1 |
| -2  | -17 | 6  | 34.08  | 9.35  | 4 |
| -1  | -17 | 6  | 70.67  | 14.40 | 1 |
| -1  | -17 | 6  | 51.05  | 12.75 | 4 |
| 0   | -17 | 6  | -1.25  | 7.86  | 4 |
| 0   | -17 | 6  | 3.23   | 8.63  | 1 |
| 1   | -17 | 6  | 149.74 | 18.32 | 1 |
| -1  | 17  | -6 | 123.73 | 18.98 | 2 |
| 1   | -17 | 6  | 106.03 | 16.17 | 4 |

|     |     |    |        |       |   |
|-----|-----|----|--------|-------|---|
| 2   | -17 | 6  | 129.10 | 16.95 | 1 |
| 2   | -17 | 6  | 155.58 | 17.74 | 4 |
| -2  | 17  | -6 | 107.65 | 18.10 | 2 |
| 3   | -17 | 6  | 27.61  | 10.56 | 4 |
| 3   | -17 | 6  | 9.02   | 8.32  | 1 |
| -3  | 17  | -6 | 32.92  | 11.30 | 2 |
| 4   | -17 | 6  | 52.46  | 12.19 | 4 |
| 4   | -17 | 6  | 49.92  | 12.65 | 1 |
| -4  | 17  | -6 | 33.77  | 11.03 | 2 |
| 5   | -17 | 6  | 1.84   | 6.95  | 4 |
| -5  | 17  | -6 | 0.18   | 7.37  | 2 |
| 5   | -17 | 6  | -1.31  | 7.03  | 1 |
| 6   | -17 | 6  | -8.41  | 6.28  | 1 |
| 6   | -17 | 6  | -12.25 | 5.69  | 4 |
| -6  | 17  | -6 | 18.69  | 9.53  | 2 |
| -7  | 17  | -6 | 5.17   | 7.79  | 2 |
| -8  | 17  | -6 | 10.56  | 9.04  | 2 |
| -9  | 17  | -6 | 21.83  | 10.51 | 2 |
| -10 | 17  | -6 | 11.39  | 9.30  | 2 |
| -11 | 17  | -6 | 72.03  | 17.06 | 2 |
| -8  | -16 | 6  | 25.27  | 16.81 | 1 |
| -8  | -16 | 6  | -2.50  | 10.96 | 4 |
| -7  | -16 | 6  | 186.28 | 26.67 | 1 |
| -7  | -16 | 6  | 156.44 | 22.86 | 4 |
| -6  | -16 | 6  | 13.85  | 10.77 | 4 |
| -6  | -16 | 6  | 29.25  | 12.45 | 1 |
| -5  | -16 | 6  | 6.02   | 9.04  | 1 |
| -5  | -16 | 6  | 0.25   | 7.18  | 4 |
| 2   | 16  | -6 | -5.12  | 6.51  | 1 |
| 1   | 16  | -6 | -0.77  | 4.72  | 1 |
| 0   | 16  | -6 | 9.75   | 6.46  | 1 |
| -1  | 16  | -6 | 12.70  | 6.87  | 1 |
| -1  | 16  | -6 | 10.88  | 7.81  | 2 |
| -2  | 16  | -6 | 4.45   | 6.96  | 2 |
| -3  | 16  | -6 | 77.78  | 14.77 | 2 |
| 4   | -16 | 6  | 36.04  | 9.52  | 4 |
| -4  | 16  | -6 | 48.26  | 11.98 | 2 |
| 4   | -16 | 6  | 28.43  | 9.39  | 1 |
| 5   | -16 | 6  | 101.02 | 13.90 | 4 |
| 5   | -16 | 6  | 121.69 | 15.09 | 1 |
| -5  | 16  | -6 | 112.33 | 17.49 | 2 |
| 6   | -16 | 6  | 236.94 | 18.30 | 4 |
| 6   | -16 | 6  | 209.70 | 18.25 | 1 |
| -6  | 16  | -6 | 199.90 | 22.57 | 2 |
| -7  | 16  | -6 | 1.72   | 7.92  | 2 |
| -8  | 16  | -6 | 1.65   | 7.08  | 2 |

|     |     |    |        |       |   |
|-----|-----|----|--------|-------|---|
| -9  | 16  | -6 | 33.40  | 11.54 | 2 |
| -10 | 16  | -6 | 11.47  | 7.95  | 2 |
| -11 | 16  | -6 | 13.84  | 8.01  | 2 |
| -12 | 16  | -6 | 42.08  | 14.65 | 2 |
| -9  | -15 | 6  | -4.23  | 16.48 | 1 |
| -9  | -15 | 6  | 1.80   | 13.18 | 4 |
| -8  | -15 | 6  | 97.87  | 20.51 | 1 |
| -8  | -15 | 6  | 64.11  | 16.35 | 4 |
| -7  | -15 | 6  | 46.49  | 13.61 | 4 |
| -7  | -15 | 6  | 51.07  | 15.58 | 1 |
| 5   | 15  | -6 | 8.76   | 8.05  | 1 |
| 4   | 15  | -6 | 66.48  | 13.82 | 1 |
| 3   | 15  | -6 | 195.14 | 20.52 | 1 |
| 2   | 15  | -6 | 120.70 | 16.80 | 1 |
| 1   | 15  | -6 | 21.11  | 7.53  | 1 |
| 0   | 15  | -6 | 23.24  | 6.92  | 1 |
| 0   | 15  | -6 | 4.33   | 6.37  | 2 |
| -1  | 15  | -6 | 10.13  | 5.34  | 1 |
| -1  | 15  | -6 | 6.07   | 6.67  | 2 |
| -2  | 15  | -6 | 65.59  | 13.05 | 2 |
| -2  | 15  | -6 | 102.73 | 13.90 | 1 |
| -3  | 15  | -6 | 7.63   | 6.52  | 2 |
| -3  | 15  | -6 | 7.37   | 5.43  | 1 |
| -4  | 15  | -6 | 53.35  | 11.58 | 2 |
| 5   | -15 | 6  | 19.88  | 8.07  | 4 |
| 5   | -15 | 6  | 11.08  | 7.82  | 1 |
| -5  | 15  | -6 | 19.03  | 7.95  | 2 |
| 6   | -15 | 6  | -4.74  | 5.78  | 1 |
| -6  | 15  | -6 | 8.41   | 7.16  | 2 |
| 6   | -15 | 6  | -3.60  | 5.57  | 4 |
| -7  | 15  | -6 | 33.47  | 10.77 | 2 |
| -8  | 15  | -6 | 23.28  | 9.96  | 2 |
| -9  | 15  | -6 | 12.85  | 9.54  | 2 |
| -10 | 15  | -6 | 13.33  | 8.24  | 2 |
| -11 | 15  | -6 | 41.34  | 11.76 | 2 |
| -12 | 15  | -6 | 52.22  | 14.90 | 2 |
| -13 | 15  | -6 | -0.09  | 8.58  | 2 |
| -9  | -14 | 6  | 51.94  | 15.73 | 4 |
| -9  | -14 | 6  | 65.83  | 17.97 | 1 |
| 7   | 14  | -6 | 1.15   | 7.62  | 1 |
| 6   | 14  | -6 | 53.69  | 12.56 | 1 |
| 5   | 14  | -6 | -2.79  | 6.73  | 1 |
| 4   | 14  | -6 | 3.07   | 6.81  | 1 |
| 3   | 14  | -6 | 23.88  | 9.00  | 1 |
| 2   | 14  | -6 | -2.11  | 5.16  | 1 |
| 1   | 14  | -6 | 60.39  | 11.58 | 1 |

|     |     |    |        |       |   |
|-----|-----|----|--------|-------|---|
| 0   | 14  | -6 | 30.67  | 9.25  | 2 |
| 0   | 14  | -6 | 18.42  | 6.85  | 1 |
| -1  | 14  | -6 | 36.13  | 8.83  | 1 |
| -1  | 14  | -6 | 21.33  | 8.23  | 2 |
| -2  | 14  | -6 | 103.51 | 15.04 | 2 |
| -2  | 14  | -6 | 76.71  | 11.77 | 1 |
| -3  | 14  | -6 | 132.18 | 14.13 | 1 |
| -3  | 14  | -6 | 105.92 | 15.04 | 2 |
| -4  | 14  | -6 | 27.45  | 8.85  | 2 |
| -4  | 14  | -6 | 27.95  | 6.81  | 1 |
| -5  | 14  | -6 | 207.79 | 15.96 | 1 |
| -5  | 14  | -6 | 205.41 | 18.78 | 2 |
| 6   | -14 | 6  | -1.56  | 5.09  | 4 |
| -6  | 14  | -6 | 4.34   | 5.95  | 2 |
| 6   | -14 | 6  | -2.80  | 5.23  | 1 |
| -7  | 14  | -6 | 29.54  | 9.98  | 2 |
| -8  | 14  | -6 | 83.91  | 15.86 | 2 |
| -9  | 14  | -6 | -1.42  | 5.60  | 2 |
| -10 | 14  | -6 | -1.88  | 5.76  | 2 |
| -11 | 14  | -6 | 21.63  | 9.46  | 2 |
| -12 | 14  | -6 | 6.74   | 8.18  | 2 |
| -13 | 14  | -6 | 11.45  | 9.39  | 2 |
| 8   | 13  | -6 | 35.04  | 11.02 | 1 |
| 7   | 13  | -6 | 15.60  | 8.80  | 1 |
| 6   | 13  | -6 | 70.28  | 14.12 | 1 |
| 5   | 13  | -6 | 221.50 | 20.76 | 1 |
| 4   | 13  | -6 | 344.06 | 23.79 | 1 |
| 3   | 13  | -6 | 8.60   | 5.89  | 1 |
| 2   | 13  | -6 | 8.80   | 6.18  | 1 |
| 1   | 13  | -6 | 273.23 | 19.07 | 1 |
| 1   | 13  | -6 | 272.56 | 20.69 | 2 |
| 0   | 13  | -6 | 14.14  | 6.70  | 2 |
| 0   | 13  | -6 | 4.33   | 4.44  | 1 |
| -1  | 13  | -6 | 47.70  | 10.51 | 2 |
| -1  | 13  | -6 | 44.49  | 8.72  | 1 |
| -2  | 13  | -6 | 38.92  | 8.13  | 1 |
| -2  | 13  | -6 | 45.61  | 10.34 | 2 |
| -3  | 13  | -6 | 203.73 | 17.56 | 2 |
| -3  | 13  | -6 | 190.44 | 14.88 | 1 |
| -4  | 13  | -6 | 9.91   | 6.24  | 2 |
| -4  | 13  | -6 | 8.73   | 4.39  | 1 |
| -5  | 13  | -6 | 218.74 | 15.50 | 1 |
| -5  | 13  | -6 | 202.09 | 18.07 | 2 |
| -6  | 13  | -6 | 29.40  | 7.09  | 1 |
| -6  | 13  | -6 | 22.29  | 8.10  | 2 |
| -7  | 13  | -6 | 33.87  | 9.69  | 2 |



|     |    |    |        |       |   |
|-----|----|----|--------|-------|---|
| -8  | 13 | -6 | -0.24  | 5.65  | 2 |
| -9  | 13 | -6 | 60.33  | 14.02 | 2 |
| -10 | 13 | -6 | 73.80  | 14.87 | 2 |
| -11 | 13 | -6 | 3.15   | 6.35  | 2 |
| -12 | 13 | -6 | 3.31   | 7.67  | 2 |
| -13 | 13 | -6 | 9.01   | 8.16  | 2 |
| -14 | 13 | -6 | 3.53   | 8.65  | 2 |
| 9   | 12 | -6 | 16.90  | 9.53  | 1 |
| 8   | 12 | -6 | 37.78  | 10.57 | 1 |
| 7   | 12 | -6 | 70.49  | 12.90 | 1 |
| 6   | 12 | -6 | 4.69   | 5.71  | 1 |
| 5   | 12 | -6 | 5.30   | 6.19  | 1 |
| 4   | 12 | -6 | 37.53  | 9.17  | 1 |
| 3   | 12 | -6 | 97.51  | 13.55 | 1 |
| 2   | 12 | -6 | 194.01 | 16.48 | 1 |
| 1   | 12 | -6 | 213.86 | 16.66 | 2 |
| 1   | 12 | -6 | 234.36 | 17.05 | 1 |
| 0   | 12 | -6 | 0.26   | 4.29  | 2 |
| 0   | 12 | -6 | 1.49   | 3.35  | 1 |
| -1  | 12 | -6 | 97.83  | 13.01 | 2 |
| -1  | 12 | -6 | 85.75  | 11.09 | 1 |
| -2  | 12 | -6 | 3.26   | 4.70  | 2 |
| -2  | 12 | -6 | 13.76  | 5.17  | 1 |
| -3  | 12 | -6 | 3.54   | 3.29  | 1 |
| -3  | 12 | -6 | 12.18  | 6.46  | 2 |
| -4  | 12 | -6 | 6.66   | 3.70  | 1 |
| -4  | 12 | -6 | 21.76  | 7.18  | 2 |
| -5  | 12 | -6 | 82.90  | 13.48 | 2 |
| -5  | 12 | -6 | 61.29  | 9.14  | 1 |
| -6  | 12 | -6 | -5.19  | 3.08  | 1 |
| -6  | 12 | -6 | 0.89   | 5.84  | 2 |
| -7  | 12 | -6 | 16.09  | 7.16  | 2 |
| -8  | 12 | -6 | 83.99  | 15.11 | 2 |
| -9  | 12 | -6 | 7.09   | 6.94  | 2 |
| -10 | 12 | -6 | 37.43  | 10.64 | 2 |
| -11 | 12 | -6 | 94.15  | 16.86 | 2 |
| -12 | 12 | -6 | 1.08   | 5.38  | 2 |
| -13 | 12 | -6 | 47.08  | 13.36 | 2 |
| -14 | 12 | -6 | 210.84 | 25.55 | 2 |
| 9   | 11 | -6 | 55.58  | 12.00 | 1 |
| 8   | 11 | -6 | 293.84 | 21.66 | 1 |
| 7   | 11 | -6 | 468.70 | 27.67 | 1 |
| 6   | 11 | -6 | 20.84  | 7.47  | 1 |
| 5   | 11 | -6 | 14.85  | 6.93  | 1 |
| 4   | 11 | -6 | 494.96 | 27.22 | 1 |
| 3   | 11 | -6 | -1.03  | 3.96  | 1 |

|     |    |    |         |       |   |
|-----|----|----|---------|-------|---|
| 2   | 11 | -6 | 91.85   | 12.10 | 1 |
| 2   | 11 | -6 | 122.20  | 13.04 | 2 |
| 1   | 11 | -6 | 5.41    | 3.60  | 1 |
| 1   | 11 | -6 | 3.44    | 4.35  | 2 |
| 0   | 11 | -6 | 219.46  | 15.97 | 2 |
| 0   | 11 | -6 | 215.92  | 15.32 | 1 |
| -1  | 11 | -6 | 6.85    | 4.80  | 2 |
| -1  | 11 | -6 | 7.12    | 3.74  | 1 |
| -2  | 11 | -6 | 13.63   | 5.00  | 1 |
| -2  | 11 | -6 | 10.21   | 4.99  | 2 |
| -3  | 11 | -6 | 133.53  | 11.40 | 1 |
| -3  | 11 | -6 | 97.21   | 12.32 | 2 |
| -4  | 11 | -6 | 49.78   | 10.25 | 2 |
| -4  | 11 | -6 | 39.47   | 7.19  | 1 |
| -5  | 11 | -6 | 1372.98 | 47.79 | 1 |
| -5  | 11 | -6 | 1243.27 | 52.95 | 2 |
| -6  | 11 | -6 | 473.56  | 23.18 | 1 |
| -6  | 11 | -6 | 499.59  | 29.63 | 2 |
| -7  | 11 | -6 | 9.56    | 6.54  | 2 |
| -8  | 11 | -6 | 313.82  | 24.05 | 2 |
| -9  | 11 | -6 | 14.50   | 7.14  | 2 |
| -10 | 11 | -6 | 185.52  | 21.15 | 2 |
| -11 | 11 | -6 | 52.18   | 12.49 | 2 |
| -12 | 11 | -6 | 198.30  | 23.02 | 2 |
| -13 | 11 | -6 | 41.99   | 11.85 | 2 |
| -14 | 11 | -6 | 8.79    | 7.45  | 2 |
| 9   | 10 | -6 | 116.01  | 14.86 | 1 |
| 8   | 10 | -6 | 7.25    | 6.56  | 1 |
| 7   | 10 | -6 | 0.19    | 5.43  | 1 |
| 6   | 10 | -6 | 501.99  | 27.80 | 1 |
| 5   | 10 | -6 | -1.07   | 4.08  | 1 |
| 4   | 10 | -6 | 337.38  | 21.08 | 1 |
| 3   | 10 | -6 | 82.98   | 11.35 | 1 |
| 2   | 10 | -6 | 199.90  | 15.14 | 1 |
| 2   | 10 | -6 | 199.16  | 14.81 | 2 |
| 1   | 10 | -6 | 184.95  | 14.02 | 2 |
| 1   | 10 | -6 | 184.70  | 14.19 | 1 |
| 0   | 10 | -6 | 575.35  | 28.12 | 1 |
| 0   | 10 | -6 | 682.55  | 29.92 | 2 |
| -1  | 10 | -6 | 522.33  | 24.90 | 1 |
| -1  | 10 | -6 | 468.47  | 24.44 | 2 |
| -2  | 10 | -6 | 54.33   | 9.00  | 2 |
| -2  | 10 | -6 | 47.33   | 8.12  | 1 |
| -3  | 10 | -6 | 509.88  | 26.08 | 2 |
| -3  | 10 | -6 | 468.41  | 23.00 | 1 |
| -4  | 10 | -6 | 126.46  | 13.86 | 2 |

|     |    |    |         |       |   |
|-----|----|----|---------|-------|---|
| -4  | 10 | -6 | 142.07  | 11.31 | 1 |
| -5  | 10 | -6 | 452.14  | 21.39 | 1 |
| -5  | 10 | -6 | 455.58  | 26.33 | 2 |
| -6  | 10 | -6 | 314.80  | 21.75 | 2 |
| -6  | 10 | -6 | 268.05  | 15.51 | 1 |
| -7  | 10 | -6 | 169.55  | 17.97 | 2 |
| -8  | 10 | -6 | 62.69   | 12.32 | 2 |
| -9  | 10 | -6 | 56.39   | 11.89 | 2 |
| -10 | 10 | -6 | -1.59   | 5.14  | 2 |
| -11 | 10 | -6 | 0.98    | 4.39  | 2 |
| -12 | 10 | -6 | 301.78  | 25.36 | 2 |
| -13 | 10 | -6 | 53.45   | 13.42 | 2 |
| -14 | 10 | -6 | 20.84   | 10.54 | 2 |
| -15 | 10 | -6 | 4.96    | 8.40  | 2 |
| -13 | -9 | 6  | 10.25   | 9.70  | 3 |
| -12 | -9 | 6  | -1.72   | 6.97  | 3 |
| -11 | -9 | 6  | 12.26   | 8.12  | 3 |
| -10 | -9 | 6  | 205.90  | 19.66 | 3 |
| 9   | 9  | -6 | 271.83  | 19.75 | 1 |
| -9  | -9 | 6  | 261.48  | 19.85 | 3 |
| -8  | -9 | 6  | 23.88   | 7.25  | 3 |
| 8   | 9  | -6 | 23.05   | 7.72  | 1 |
| -7  | -9 | 6  | 71.44   | 10.59 | 3 |
| 7   | 9  | -6 | 80.37   | 11.58 | 1 |
| -6  | -9 | 6  | 292.26  | 17.96 | 3 |
| 6   | 9  | -6 | 282.94  | 19.29 | 1 |
| -5  | -9 | 6  | 2.68    | 3.82  | 3 |
| 5   | 9  | -6 | 1.55    | 4.22  | 1 |
| 4   | 9  | -6 | 105.72  | 11.78 | 1 |
| 3   | 9  | -6 | 335.76  | 19.84 | 1 |
| 2   | 9  | -6 | 518.51  | 24.54 | 2 |
| 2   | 9  | -6 | 537.17  | 25.79 | 1 |
| 1   | 9  | -6 | 22.61   | 5.80  | 1 |
| 1   | 9  | -6 | 16.73   | 4.62  | 2 |
| 0   | 9  | -6 | 13.40   | 4.64  | 1 |
| 0   | 9  | -6 | 26.94   | 6.22  | 2 |
| -1  | 9  | -6 | 119.52  | 10.49 | 1 |
| -1  | 9  | -6 | 114.69  | 10.22 | 2 |
| -2  | 9  | -6 | 637.79  | 29.13 | 2 |
| -2  | 9  | -6 | 642.30  | 27.41 | 1 |
| -3  | 9  | -6 | 2274.55 | 77.28 | 2 |
| -3  | 9  | -6 | 2230.85 | 72.14 | 1 |
| -4  | 9  | -6 | 480.76  | 25.70 | 2 |
| -4  | 9  | -6 | 466.67  | 21.72 | 1 |
| -5  | 9  | -6 | 255.17  | 17.98 | 2 |
| -5  | 9  | -6 | 248.37  | 14.06 | 1 |

|     |    |    |         |       |   |
|-----|----|----|---------|-------|---|
| -6  | 9  | -6 | 124.64  | 14.58 | 2 |
| -7  | 9  | -6 | 35.62   | 9.36  | 2 |
| -8  | 9  | -6 | -3.14   | 4.56  | 2 |
| -9  | 9  | -6 | 20.70   | 8.15  | 2 |
| -10 | 9  | -6 | 575.14  | 34.44 | 2 |
| -11 | 9  | -6 | 202.00  | 22.01 | 2 |
| -12 | 9  | -6 | 87.41   | 16.10 | 2 |
| -13 | 9  | -6 | 2.55    | 5.95  | 2 |
| -14 | 9  | -6 | -7.80   | 5.94  | 2 |
| -15 | 9  | -6 | 55.55   | 15.76 | 2 |
| -14 | -8 | 6  | -4.57   | 8.81  | 3 |
| -13 | -8 | 6  | 26.41   | 10.12 | 3 |
| -12 | -8 | 6  | 138.39  | 18.93 | 3 |
| -11 | -8 | 6  | 115.90  | 16.21 | 3 |
| -10 | -8 | 6  | 8.59    | 6.54  | 3 |
| -9  | -8 | 6  | 68.58   | 11.57 | 3 |
| 9   | 8  | -6 | 44.18   | 9.50  | 1 |
| 8   | 8  | -6 | 203.33  | 16.25 | 1 |
| -8  | -8 | 6  | 194.39  | 15.98 | 3 |
| -7  | -8 | 6  | 7.88    | 5.41  | 3 |
| 7   | 8  | -6 | 12.75   | 5.93  | 1 |
| 6   | 8  | -6 | 83.45   | 10.72 | 1 |
| -6  | -8 | 6  | 96.43   | 10.53 | 3 |
| -5  | -8 | 6  | 23.04   | 5.50  | 3 |
| 5   | 8  | -6 | 33.17   | 7.37  | 1 |
| 4   | 8  | -6 | 129.22  | 12.20 | 1 |
| -4  | -8 | 6  | 116.39  | 9.42  | 3 |
| 3   | 8  | -6 | 120.91  | 11.68 | 1 |
| -3  | -8 | 6  | 135.51  | 9.15  | 3 |
| -2  | -8 | 6  | 53.18   | 5.12  | 3 |
| 2   | 8  | -6 | 66.50   | 8.73  | 1 |
| -1  | -8 | 6  | 29.80   | 3.53  | 3 |
| 1   | 8  | -6 | 34.77   | 5.95  | 2 |
| 1   | 8  | -6 | 17.52   | 4.93  | 1 |
| 0   | 8  | -6 | -0.24   | 2.33  | 1 |
| 0   | 8  | -6 | 4.56    | 2.92  | 2 |
| -1  | 8  | -6 | 233.35  | 14.27 | 1 |
| -1  | 8  | -6 | 236.11  | 14.59 | 2 |
| -2  | 8  | -6 | 40.20   | 6.24  | 1 |
| -2  | 8  | -6 | 45.16   | 7.63  | 2 |
| -3  | 8  | -6 | 109.33  | 11.62 | 2 |
| -3  | 8  | -6 | 114.65  | 9.10  | 1 |
| -4  | 8  | -6 | 1787.96 | 64.79 | 2 |
| -4  | 8  | -6 | 1886.65 | 59.43 | 1 |
| -5  | 8  | -6 | 369.34  | 17.26 | 1 |
| -5  | 8  | -6 | 335.68  | 21.26 | 2 |

-6 8 -6 293.77 20.46 2  
-7 8 -6 33.76 9.07 2  
-8 8 -6 12.07 6.58 2  
-9 8 -6 212.31 18.84 2  
-10 8 -6 140.46 17.76 2  
-11 8 -6 -5.30 3.33 2  
-12 8 -6 7.48 5.89 2  
-13 8 -6 116.30 18.05 2  
-14 8 -6 27.06 10.25 2  
-15 8 -6 16.05 10.34 2  
-15 -7 6 17.97 12.95 3  
-14 -7 6 22.98 11.99 3  
-13 -7 6 9.85 6.93 3  
-12 -7 6 82.17 14.87 3  
-11 -7 6 -8.36 4.74 3  
-10 -7 6 51.40 10.73 3  
9 7 -6 24.03 6.88 1  
-9 -7 6 17.30 7.36 3  
8 7 -6 -2.17 3.51 1  
-8 -7 6 8.13 4.85 3  
7 7 -6 89.19 10.69 1  
-7 -7 6 116.07 12.08 3  
6 7 -6 12.25 4.64 1  
-6 -7 6 4.86 4.27 3  
5 7 -6 590.62 27.06 1  
-5 -7 6 558.62 24.84 3  
-4 -7 6 56.80 7.15 3  
4 7 -6 56.09 8.53 1  
3 7 -6 104.92 10.18 1  
-3 -7 6 86.57 7.24 3  
2 7 -6 17.33 4.37 2  
2 7 -6 10.04 3.80 1  
-2 -7 6 17.46 3.34 3  
-1 -7 6 736.37 25.22 3  
1 7 -6 737.37 29.87 1  
0 7 -6 1408.03 47.80 2  
0 7 -6 1377.97 47.85 1  
-1 7 -6 268.06 15.40 2  
-1 7 -6 296.29 15.52 1  
-2 7 -6 116.88 8.96 1  
-2 7 -6 124.83 10.11 2  
-3 7 -6 284.31 17.10 2  
-3 7 -6 281.58 14.43 1  
-4 7 -6 455.79 23.96 2  
-4 7 -6 431.27 19.10 1  
-5 7 -6 82.73 11.12 2

|     |    |    |         |       |   |
|-----|----|----|---------|-------|---|
| -5  | 7  | -6 | 81.41   | 7.07  | 1 |
| -6  | 7  | -6 | 48.52   | 9.32  | 2 |
| -7  | 7  | -6 | 15.14   | 5.72  | 2 |
| -8  | 7  | -6 | 50.94   | 10.29 | 2 |
| -9  | 7  | -6 | 8.01    | 4.61  | 2 |
| -10 | 7  | -6 | 41.72   | 9.99  | 2 |
| -11 | 7  | -6 | 29.89   | 9.86  | 2 |
| -12 | 7  | -6 | 48.86   | 11.11 | 2 |
| -13 | 7  | -6 | 215.86  | 23.22 | 2 |
| -14 | 7  | -6 | 30.50   | 10.86 | 2 |
| -15 | 7  | -6 | 4.15    | 7.72  | 2 |
| -15 | -6 | 6  | -1.46   | 9.07  | 3 |
| -14 | -6 | 6  | 6.18    | 7.67  | 3 |
| -13 | -6 | 6  | 24.14   | 9.92  | 3 |
| -12 | -6 | 6  | 112.06  | 16.62 | 3 |
| -11 | -6 | 6  | 265.11  | 21.73 | 3 |
| -10 | -6 | 6  | 22.05   | 8.06  | 3 |
| 10  | 6  | -6 | 14.51   | 5.32  | 1 |
| -9  | -6 | 6  | 91.66   | 12.60 | 3 |
| 9   | 6  | -6 | 89.65   | 10.85 | 1 |
| -8  | -6 | 6  | 0.59    | 3.81  | 3 |
| 8   | 6  | -6 | 1.97    | 3.80  | 1 |
| -7  | -6 | 6  | 9.66    | 5.01  | 3 |
| 7   | 6  | -6 | 15.11   | 5.44  | 1 |
| -6  | -6 | 6  | 645.96  | 28.37 | 3 |
| 6   | 6  | -6 | 640.07  | 28.19 | 1 |
| 5   | 6  | -6 | 446.44  | 22.56 | 1 |
| -5  | -6 | 6  | 509.93  | 22.57 | 3 |
| 4   | 6  | -6 | 286.91  | 16.29 | 1 |
| -4  | -6 | 6  | 276.53  | 14.54 | 3 |
| 3   | 6  | -6 | 80.06   | 8.76  | 1 |
| -3  | -6 | 6  | 65.85   | 6.52  | 3 |
| 3   | 6  | -6 | 79.50   | 6.83  | 2 |
| 2   | 6  | -6 | 758.62  | 29.90 | 1 |
| -2  | -6 | 6  | 733.33  | 26.12 | 3 |
| 2   | 6  | -6 | 758.36  | 27.74 | 2 |
| -1  | -6 | 6  | 1248.31 | 40.28 | 3 |
| 1   | 6  | -6 | 1263.75 | 43.65 | 1 |
| 0   | 6  | -6 | 132.37  | 9.25  | 2 |
| 0   | 6  | -6 | 142.83  | 9.91  | 1 |
| -1  | 6  | -6 | 1347.59 | 46.90 | 2 |
| -1  | 6  | -6 | 1383.22 | 45.93 | 1 |
| -2  | 6  | -6 | 1730.54 | 55.81 | 1 |
| -2  | 6  | -6 | 1773.33 | 59.38 | 2 |
| -3  | 6  | -6 | 29.32   | 4.77  | 1 |
| -3  | 6  | -6 | 25.88   | 5.87  | 2 |

|     |    |    |        |       |   |
|-----|----|----|--------|-------|---|
| -4  | 6  | -6 | 52.38  | 5.84  | 1 |
| -4  | 6  | -6 | 56.24  | 8.65  | 2 |
| -5  | 6  | -6 | -1.11  | 3.33  | 2 |
| -5  | 6  | -6 | -0.90  | 1.93  | 1 |
| -6  | 6  | -6 | 93.28  | 11.91 | 2 |
| -7  | 6  | -6 | 66.68  | 10.90 | 2 |
| -8  | 6  | -6 | 118.99 | 14.31 | 2 |
| -9  | 6  | -6 | 10.84  | 4.95  | 2 |
| -10 | 6  | -6 | 28.88  | 8.34  | 2 |
| -11 | 6  | -6 | 288.28 | 22.92 | 2 |
| -12 | 6  | -6 | -6.85  | 3.86  | 2 |
| -13 | 6  | -6 | 4.61   | 5.85  | 2 |
| -14 | 6  | -6 | 303.63 | 26.36 | 2 |
| -15 | 6  | -6 | 43.15  | 13.33 | 2 |
| -16 | -5 | 6  | 6.12   | 10.23 | 3 |
| -15 | -5 | 6  | 21.63  | 11.46 | 3 |
| -14 | -5 | 6  | 29.71  | 10.70 | 3 |
| -13 | -5 | 6  | 3.11   | 6.80  | 3 |
| -12 | -5 | 6  | 34.38  | 9.77  | 3 |
| -11 | -5 | 6  | 28.88  | 9.04  | 3 |
| -10 | -5 | 6  | 151.37 | 16.22 | 3 |
| 10  | 5  | -6 | 175.58 | 13.86 | 1 |
| -9  | -5 | 6  | 15.29  | 6.29  | 3 |
| 9   | 5  | -6 | 0.73   | 3.17  | 1 |
| 8   | 5  | -6 | 178.57 | 13.36 | 1 |
| -8  | -5 | 6  | 164.02 | 14.30 | 3 |
| 7   | 5  | -6 | 562.46 | 25.31 | 1 |
| -7  | -5 | 6  | 498.81 | 25.46 | 3 |
| -6  | -5 | 6  | 235.76 | 15.02 | 3 |
| 6   | 5  | -6 | 252.18 | 15.37 | 1 |
| 5   | 5  | -6 | 147.25 | 11.17 | 1 |
| -5  | -5 | 6  | 155.69 | 11.16 | 3 |
| -4  | -5 | 6  | 223.84 | 12.66 | 3 |
| 4   | 5  | -6 | 209.64 | 13.54 | 1 |
| 3   | 5  | -6 | 12.61  | 3.06  | 2 |
| -3  | -5 | 6  | 15.13  | 3.68  | 3 |
| 3   | 5  | -6 | 8.93   | 3.72  | 1 |
| 2   | 5  | -6 | 830.88 | 28.95 | 2 |
| 2   | 5  | -6 | 815.68 | 31.29 | 1 |
| -2  | -5 | 6  | 852.61 | 29.04 | 3 |
| -1  | -5 | 6  | 636.25 | 23.78 | 3 |
| 1   | 5  | -6 | 670.43 | 26.27 | 1 |
| 1   | 5  | -6 | 664.69 | 24.40 | 2 |
| 0   | 5  | -6 | 396.75 | 18.21 | 1 |
| -1  | 5  | -6 | 190.80 | 11.16 | 1 |
| -1  | 5  | -6 | 168.62 | 10.91 | 2 |

|     |    |    |        |       |   |
|-----|----|----|--------|-------|---|
| -2  | 5  | -6 | 30.24  | 4.71  | 1 |
| -2  | 5  | -6 | 23.63  | 5.38  | 2 |
| -3  | 5  | -6 | 363.61 | 16.25 | 1 |
| -3  | 5  | -6 | 393.33 | 20.06 | 2 |
| -4  | 5  | -6 | 55.79  | 8.44  | 2 |
| -4  | 5  | -6 | 52.91  | 5.52  | 1 |
| -5  | 5  | -6 | 414.67 | 17.21 | 1 |
| -5  | 5  | -6 | 458.13 | 23.81 | 2 |
| -6  | 5  | -6 | 47.77  | 9.07  | 2 |
| -7  | 5  | -6 | 53.58  | 10.07 | 2 |
| -8  | 5  | -6 | 34.08  | 8.40  | 2 |
| -9  | 5  | -6 | 18.94  | 6.31  | 2 |
| -10 | 5  | -6 | 93.37  | 14.74 | 2 |
| -11 | 5  | -6 | 683.51 | 38.07 | 2 |
| -12 | 5  | -6 | 8.16   | 6.37  | 2 |
| -13 | 5  | -6 | 4.59   | 5.19  | 2 |
| -14 | 5  | -6 | 35.79  | 11.19 | 2 |
| -15 | 5  | -6 | -1.62  | 6.29  | 2 |
| -16 | -4 | 6  | 32.75  | 13.41 | 3 |
| -15 | -4 | 6  | 50.80  | 13.45 | 3 |
| -14 | -4 | 6  | 138.52 | 19.29 | 3 |
| -13 | -4 | 6  | -1.32  | 5.70  | 3 |
| -12 | -4 | 6  | -0.27  | 5.16  | 3 |
| -11 | -4 | 6  | 32.34  | 9.08  | 3 |
| 10  | 4  | -6 | 5.61   | 4.47  | 1 |
| -10 | -4 | 6  | -3.65  | 3.71  | 3 |
| 9   | 4  | -6 | 22.80  | 5.78  | 1 |
| -9  | -4 | 6  | 29.92  | 7.86  | 3 |
| -8  | -4 | 6  | 19.39  | 6.35  | 3 |
| 8   | 4  | -6 | 14.54  | 4.78  | 1 |
| 7   | 4  | -6 | 142.50 | 11.12 | 1 |
| -7  | -4 | 6  | 146.83 | 12.30 | 3 |
| -7  | -4 | 6  | 143.45 | 9.24  | 2 |
| 6   | 4  | -6 | 15.46  | 4.49  | 1 |
| -6  | -4 | 6  | 23.32  | 5.37  | 3 |
| -5  | -4 | 6  | 56.49  | 7.26  | 3 |
| 5   | 4  | -6 | 38.56  | 6.36  | 1 |
| -4  | -4 | 6  | 483.69 | 20.91 | 3 |
| 4   | 4  | -6 | 496.37 | 21.97 | 1 |
| 3   | 4  | -6 | 171.29 | 11.43 | 1 |
| 3   | 4  | -6 | 196.43 | 8.99  | 2 |
| -3  | -4 | 6  | 175.90 | 10.39 | 3 |
| -2  | -4 | 6  | 90.34  | 6.80  | 3 |
| 2   | 4  | -6 | 85.55  | 7.58  | 1 |
| 2   | 4  | -6 | 95.65  | 5.90  | 2 |
| 1   | 4  | -6 | 19.58  | 4.45  | 1 |



|     |    |    |        |       |   |
|-----|----|----|--------|-------|---|
| 1   | 4  | -6 | 17.59  | 3.31  | 2 |
| 0   | 4  | -6 | 198.34 | 11.44 | 1 |
| -1  | 4  | -6 | -3.28  | 1.88  | 2 |
| -1  | 4  | -6 | -0.25  | 1.63  | 1 |
| -2  | 4  | -6 | 110.41 | 9.30  | 2 |
| -2  | 4  | -6 | 116.92 | 8.07  | 1 |
| -3  | 4  | -6 | 12.16  | 4.56  | 2 |
| -3  | 4  | -6 | 13.40  | 3.31  | 1 |
| -4  | 4  | -6 | 686.36 | 24.76 | 1 |
| -4  | 4  | -6 | 700.24 | 30.23 | 2 |
| -5  | 4  | -6 | 112.65 | 7.42  | 1 |
| -5  | 4  | -6 | 121.85 | 12.14 | 2 |
| -6  | 4  | -6 | 16.42  | 5.50  | 2 |
| -7  | 4  | -6 | 1.15   | 3.53  | 2 |
| -8  | 4  | -6 | 0.18   | 2.84  | 2 |
| -9  | 4  | -6 | 21.96  | 7.28  | 2 |
| -10 | 4  | -6 | 75.01  | 13.00 | 2 |
| -11 | 4  | -6 | 39.44  | 9.95  | 2 |
| -12 | 4  | -6 | 321.53 | 25.23 | 2 |
| -13 | 4  | -6 | 132.54 | 19.57 | 2 |
| -14 | 4  | -6 | 4.44   | 6.21  | 2 |
| -16 | -3 | 6  | 52.85  | 14.89 | 3 |
| -15 | -3 | 6  | 23.41  | 10.82 | 3 |
| -14 | -3 | 6  | 15.02  | 7.49  | 3 |
| -13 | -3 | 6  | 52.18  | 12.64 | 3 |
| -12 | -3 | 6  | 36.85  | 9.88  | 3 |
| -11 | -3 | 6  | -1.02  | 4.29  | 3 |
| -10 | -3 | 6  | 49.45  | 10.24 | 3 |
| 10  | 3  | -6 | 38.33  | 7.29  | 1 |
| 9   | 3  | -6 | 618.94 | 27.00 | 1 |
| -9  | -3 | 6  | 626.64 | 31.13 | 3 |
| -8  | -3 | 6  | 783.57 | 34.71 | 3 |
| -7  | -3 | 6  | 86.64  | 10.37 | 3 |
| 7   | 3  | -6 | 117.97 | 9.72  | 1 |
| -7  | -3 | 6  | 117.80 | 7.63  | 2 |
| 6   | 3  | -6 | 0.38   | 2.28  | 1 |
| -6  | -3 | 6  | 2.40   | 3.41  | 3 |
| -6  | -3 | 6  | -1.49  | 1.57  | 2 |
| -5  | -3 | 6  | 87.53  | 8.56  | 3 |
| 5   | 3  | -6 | 68.07  | 7.55  | 1 |
| -4  | -3 | 6  | 195.58 | 11.60 | 3 |
| 4   | 3  | -6 | 179.56 | 11.68 | 1 |
| 3   | 3  | -6 | 1.70   | 2.55  | 1 |
| 3   | 3  | -6 | 2.15   | 1.28  | 2 |
| -3  | -3 | 6  | 1.32   | 2.23  | 3 |
| -2  | -3 | 6  | 168.05 | 9.83  | 3 |

|     |    |    |         |       |   |
|-----|----|----|---------|-------|---|
| 2   | 3  | -6 | 154.22  | 10.22 | 1 |
| 2   | 3  | -6 | 171.23  | 7.84  | 2 |
| 1   | 3  | -6 | 389.32  | 17.70 | 1 |
| 1   | 3  | -6 | 418.31  | 15.98 | 2 |
| 0   | 3  | -6 | 134.92  | 9.00  | 1 |
| -1  | 3  | -6 | 828.20  | 29.74 | 1 |
| -1  | 3  | -6 | 851.33  | 31.06 | 2 |
| -2  | 3  | -6 | 1424.41 | 48.03 | 2 |
| -2  | 3  | -6 | 1357.82 | 44.43 | 1 |
| -3  | 3  | -6 | 824.23  | 32.74 | 2 |
| -3  | 3  | -6 | 817.40  | 28.52 | 1 |
| -4  | 3  | -6 | 325.02  | 14.20 | 1 |
| -4  | 3  | -6 | 334.66  | 18.78 | 2 |
| -5  | 3  | -6 | 160.83  | 9.01  | 1 |
| -5  | 3  | -6 | 175.02  | 13.67 | 2 |
| -6  | 3  | -6 | 15.08   | 5.56  | 2 |
| -7  | 3  | -6 | 31.90   | 7.84  | 2 |
| -8  | 3  | -6 | 71.53   | 11.57 | 2 |
| -9  | 3  | -6 | 25.46   | 7.62  | 2 |
| -10 | 3  | -6 | 11.01   | 6.02  | 2 |
| -11 | 3  | -6 | 13.97   | 5.85  | 2 |
| -12 | 3  | -6 | 11.36   | 6.81  | 2 |
| -13 | 3  | -6 | 7.57    | 6.78  | 2 |
| -14 | 3  | -6 | 44.44   | 12.66 | 2 |
| -17 | -2 | 6  | 22.24   | 11.88 | 3 |
| -16 | -2 | 6  | 8.36    | 9.15  | 3 |
| -15 | -2 | 6  | 27.44   | 10.51 | 3 |
| -14 | -2 | 6  | 64.38   | 13.90 | 3 |
| -13 | -2 | 6  | -2.48   | 5.36  | 3 |
| -12 | -2 | 6  | 73.31   | 13.19 | 3 |
| -11 | -2 | 6  | -0.72   | 4.72  | 3 |
| -10 | -2 | 6  | 61.62   | 11.14 | 3 |
| 10  | 2  | -6 | 50.59   | 7.54  | 1 |
| -9  | -2 | 6  | 45.14   | 8.89  | 3 |
| 9   | 2  | -6 | 60.86   | 7.71  | 1 |
| 7   | 2  | -6 | 128.79  | 10.18 | 1 |
| -7  | -2 | 6  | 140.50  | 7.91  | 2 |
| -7  | -2 | 6  | 159.69  | 12.53 | 3 |
| -6  | -2 | 6  | 51.41   | 7.47  | 3 |
| -6  | -2 | 6  | 46.00   | 3.92  | 2 |
| 6   | 2  | -6 | 51.40   | 6.65  | 1 |
| 5   | 2  | -6 | 785.09  | 29.60 | 1 |
| -5  | -2 | 6  | 730.12  | 29.64 | 3 |
| 4   | 2  | -6 | 187.43  | 11.58 | 1 |
| -4  | -2 | 6  | 177.51  | 11.02 | 3 |
| -3  | -2 | 6  | 52.41   | 6.07  | 3 |

|     |    |    |         |        |   |
|-----|----|----|---------|--------|---|
| 3   | 2  | -6 | 49.35   | 6.02   | 1 |
| 2   | 2  | -6 | 749.26  | 24.07  | 2 |
| 2   | 2  | -6 | 754.24  | 28.10  | 1 |
| -2  | -2 | 6  | 746.86  | 28.03  | 3 |
| 1   | 2  | -6 | 833.46  | 30.14  | 1 |
| 1   | 2  | -6 | 838.90  | 28.09  | 2 |
| 0   | 2  | -6 | -0.94   | 1.43   | 2 |
| 0   | 2  | -6 | 3.06    | 2.08   | 1 |
| -1  | 2  | -6 | 3373.20 | 100.59 | 1 |
| -1  | 2  | -6 | 3514.16 | 104.00 | 2 |
| -2  | 2  | -6 | 3322.90 | 97.32  | 1 |
| -2  | 2  | -6 | 3332.79 | 101.90 | 2 |
| -3  | 2  | -6 | 1.79    | 2.10   | 1 |
| -3  | 2  | -6 | 1.78    | 3.00   | 2 |
| -4  | 2  | -6 | 28.19   | 4.16   | 1 |
| -4  | 2  | -6 | 21.95   | 5.54   | 2 |
| -5  | 2  | -6 | 84.23   | 10.39  | 2 |
| -5  | 2  | -6 | 66.68   | 5.82   | 1 |
| -6  | 2  | -6 | 61.73   | 9.85   | 2 |
| -7  | 2  | -6 | 36.67   | 8.28   | 2 |
| -8  | 2  | -6 | 9.30    | 4.94   | 2 |
| -9  | 2  | -6 | 429.90  | 26.82  | 2 |
| -10 | 2  | -6 | 82.20   | 14.02  | 2 |
| -11 | 2  | -6 | 34.69   | 10.68  | 2 |
| -12 | 2  | -6 | 5.57    | 6.26   | 2 |
| -13 | 2  | -6 | 6.41    | 6.79   | 2 |
| -14 | 2  | -6 | 33.64   | 12.33  | 2 |
| -17 | -1 | 6  | -12.45  | 7.47   | 3 |
| -16 | -1 | 6  | 24.45   | 11.43  | 3 |
| -15 | -1 | 6  | 7.94    | 7.71   | 3 |
| -14 | -1 | 6  | 84.70   | 15.30  | 3 |
| -13 | -1 | 6  | 23.81   | 8.83   | 3 |
| -12 | -1 | 6  | 5.71    | 6.08   | 3 |
| -11 | -1 | 6  | 252.09  | 19.82  | 3 |
| -10 | -1 | 6  | 793.86  | 37.65  | 3 |
| 10  | 1  | -6 | 806.13  | 31.60  | 1 |
| -9  | -1 | 6  | -4.77   | 3.23   | 3 |
| 9   | 1  | -6 | 1.22    | 2.70   | 1 |
| -8  | -1 | 6  | -2.21   | 3.07   | 3 |
| 8   | 1  | -6 | 0.99    | 2.08   | 1 |
| -7  | -1 | 6  | 308.51  | 18.03  | 3 |
| 7   | 1  | -6 | 330.08  | 16.84  | 1 |
| -7  | -1 | 6  | 320.97  | 12.81  | 2 |
| -6  | -1 | 6  | 118.22  | 5.54   | 2 |
| 6   | 1  | -6 | 119.16  | 9.60   | 1 |
| -6  | -1 | 6  | 129.38  | 10.44  | 3 |

|     |    |    |         |       |   |
|-----|----|----|---------|-------|---|
| -5  | -1 | 6  | 66.46   | 7.75  | 3 |
| 5   | 1  | -6 | 68.53   | 7.48  | 1 |
| 4   | 1  | -6 | 195.23  | 11.63 | 1 |
| -4  | -1 | 6  | 180.46  | 11.52 | 3 |
| 3   | 1  | -6 | 34.52   | 5.22  | 1 |
| -3  | -1 | 6  | 42.23   | 5.85  | 3 |
| 2   | 1  | -6 | 536.97  | 21.98 | 1 |
| -2  | -1 | 6  | 540.10  | 22.98 | 3 |
| 2   | 1  | -6 | 563.90  | 18.69 | 2 |
| 1   | 1  | -6 | 18.08   | 3.15  | 2 |
| 1   | 1  | -6 | 15.15   | 3.45  | 1 |
| 0   | 1  | -6 | 70.54   | 6.23  | 1 |
| -1  | 1  | -6 | 125.33  | 8.87  | 2 |
| -1  | 1  | -6 | 136.19  | 8.62  | 1 |
| -2  | 1  | -6 | 2269.49 | 68.30 | 1 |
| -2  | 1  | -6 | 2250.84 | 72.24 | 2 |
| -3  | 1  | -6 | 2673.36 | 79.51 | 1 |
| -3  | 1  | -6 | 2683.73 | 85.44 | 2 |
| -4  | 1  | -6 | 25.67   | 4.11  | 1 |
| -4  | 1  | -6 | 28.91   | 6.34  | 2 |
| -5  | 1  | -6 | -0.84   | 2.98  | 2 |
| -5  | 1  | -6 | 2.98    | 2.46  | 1 |
| -6  | 1  | -6 | 8.50    | 4.37  | 2 |
| -7  | 1  | -6 | 15.10   | 5.52  | 2 |
| -8  | 1  | -6 | 35.47   | 8.72  | 2 |
| -9  | 1  | -6 | 9.51    | 5.48  | 2 |
| -10 | 1  | -6 | 2.53    | 4.78  | 2 |
| -11 | 1  | -6 | 19.48   | 8.17  | 2 |
| -12 | 1  | -6 | 10.31   | 6.26  | 2 |
| -13 | 1  | -6 | 37.00   | 13.16 | 2 |
| -14 | 1  | -6 | 15.44   | 9.34  | 2 |
| -17 | 0  | 6  | 148.90  | 22.88 | 3 |
| -16 | 0  | 6  | 28.64   | 11.36 | 3 |
| -15 | 0  | 6  | 16.08   | 8.89  | 3 |
| -14 | 0  | 6  | 311.67  | 25.21 | 3 |
| -13 | 0  | 6  | 18.33   | 7.73  | 3 |
| -12 | 0  | 6  | 15.37   | 7.21  | 3 |
| -11 | 0  | 6  | 25.45   | 8.24  | 3 |
| 10  | 0  | -6 | 6.76    | 3.91  | 1 |
| -10 | 0  | 6  | 8.06    | 4.81  | 3 |
| -9  | 0  | 6  | 101.76  | 12.30 | 3 |
| 9   | 0  | -6 | 129.01  | 10.19 | 1 |
| -8  | 0  | 6  | 75.59   | 5.99  | 2 |
| 8   | 0  | -6 | 61.76   | 7.24  | 1 |
| -8  | 0  | 6  | 87.26   | 10.60 | 3 |
| -7  | 0  | 6  | 2396.44 | 70.00 | 2 |

|     |    |    |         |       |   |
|-----|----|----|---------|-------|---|
| 7   | 0  | -6 | 2404.39 | 74.39 | 1 |
| -7  | 0  | 6  | 2308.84 | 78.33 | 3 |
| -6  | 0  | 6  | 345.01  | 18.51 | 3 |
| 6   | 0  | -6 | 371.00  | 17.69 | 1 |
| -5  | 0  | 6  | 565.14  | 23.98 | 3 |
| 5   | 0  | -6 | 530.33  | 22.81 | 1 |
| 4   | 0  | -6 | 25.28   | 4.80  | 1 |
| -4  | 0  | 6  | 29.41   | 5.43  | 3 |
| 3   | 0  | -6 | 11.94   | 3.56  | 1 |
| -3  | 0  | 6  | 17.95   | 4.23  | 3 |
| 3   | 0  | -6 | 15.57   | 2.06  | 2 |
| 2   | 0  | -6 | 24.92   | 4.57  | 1 |
| 2   | 0  | -6 | 22.59   | 3.00  | 2 |
| -2  | 0  | 6  | 26.37   | 5.19  | 3 |
| 1   | 0  | -6 | 16.13   | 3.14  | 2 |
| 1   | 0  | -6 | 19.48   | 4.03  | 1 |
| 0   | 0  | -6 | 1.03    | 1.72  | 1 |
| 0   | 0  | -6 | -0.78   | 1.55  | 2 |
| -1  | 0  | -6 | 39.17   | 5.12  | 1 |
| -1  | 0  | -6 | 40.00   | 5.95  | 2 |
| -2  | 0  | -6 | 38.64   | 4.91  | 1 |
| -2  | 0  | -6 | 39.36   | 6.52  | 2 |
| -3  | 0  | -6 | 49.98   | 5.53  | 1 |
| -3  | 0  | -6 | 73.62   | 9.02  | 2 |
| -4  | 0  | -6 | 57.55   | 8.98  | 2 |
| -4  | 0  | -6 | 62.60   | 6.14  | 1 |
| -5  | 0  | -6 | 698.65  | 32.17 | 2 |
| -5  | 0  | -6 | 692.39  | 25.50 | 1 |
| -6  | 0  | -6 | 3.00    | 3.54  | 2 |
| -7  | 0  | -6 | 13.95   | 5.49  | 2 |
| -8  | 0  | -6 | 43.98   | 9.27  | 2 |
| -9  | 0  | -6 | 12.45   | 5.69  | 2 |
| -10 | 0  | -6 | 20.30   | 8.29  | 2 |
| -11 | 0  | -6 | 9.01    | 6.78  | 2 |
| -12 | 0  | -6 | 17.12   | 9.07  | 2 |
| -13 | 0  | -6 | 0.31    | 7.03  | 2 |
| -14 | 0  | -6 | 61.35   | 16.16 | 2 |
| -17 | 1  | 6  | 5.68    | 6.23  | 3 |
| -16 | 1  | 6  | 5.04    | 7.54  | 3 |
| -15 | 1  | 6  | -5.89   | 5.59  | 3 |
| -14 | 1  | 6  | 9.06    | 7.03  | 3 |
| -13 | 1  | 6  | 555.44  | 33.35 | 3 |
| -12 | 1  | 6  | 63.41   | 11.96 | 3 |
| -11 | 1  | 6  | 31.03   | 8.88  | 3 |
| -10 | 1  | 6  | 143.26  | 15.10 | 3 |
| 10  | -1 | -6 | 150.57  | 11.15 | 1 |

|     |    |    |         |       |   |
|-----|----|----|---------|-------|---|
| -9  | 1  | 6  | 181.55  | 14.64 | 3 |
| 9   | -1 | -6 | 178.46  | 11.97 | 1 |
| -8  | 1  | 6  | 826.23  | 35.46 | 3 |
| -8  | 1  | 6  | 830.12  | 28.26 | 2 |
| 7   | -1 | -6 | 240.19  | 13.73 | 1 |
| -7  | 1  | 6  | 217.46  | 14.68 | 3 |
| -7  | 1  | 6  | 205.19  | 9.82  | 2 |
| -6  | 1  | 6  | 1731.03 | 50.63 | 2 |
| 6   | -1 | -6 | 1740.35 | 55.68 | 1 |
| -6  | 1  | 6  | 1624.74 | 57.79 | 3 |
| 5   | -1 | -6 | 115.48  | 9.00  | 1 |
| -5  | 1  | 6  | 92.34   | 9.18  | 3 |
| 4   | -1 | -6 | 78.75   | 7.75  | 1 |
| -4  | 1  | 6  | 77.82   | 8.15  | 3 |
| 3   | -1 | -6 | 7.17    | 3.07  | 1 |
| -3  | 1  | 6  | 4.64    | 3.17  | 3 |
| 2   | -1 | -6 | 0.56    | 1.75  | 1 |
| 1   | -1 | -6 | 602.29  | 22.84 | 2 |
| 0   | -1 | -6 | 1007.03 | 34.98 | 2 |
| 0   | -1 | -6 | 944.49  | 34.17 | 1 |
| -1  | -1 | -6 | 81.98   | 8.48  | 2 |
| -1  | -1 | -6 | 83.91   | 7.39  | 1 |
| -2  | -1 | -6 | 80.62   | 7.51  | 1 |
| -2  | -1 | -6 | 77.63   | 9.18  | 2 |
| -3  | -1 | -6 | 32.23   | 5.09  | 1 |
| -3  | -1 | -6 | 30.83   | 6.70  | 2 |
| -4  | -1 | -6 | 125.31  | 9.24  | 1 |
| -4  | -1 | -6 | 134.71  | 13.32 | 2 |
| -5  | -1 | -6 | 401.51  | 18.23 | 1 |
| -5  | -1 | -6 | 415.11  | 23.70 | 2 |
| -6  | -1 | -6 | 26.48   | 7.48  | 2 |
| -7  | -1 | -6 | 25.65   | 7.60  | 2 |
| -8  | -1 | -6 | -0.45   | 3.62  | 2 |
| -9  | -1 | -6 | 36.05   | 9.48  | 2 |
| -10 | -1 | -6 | 20.20   | 8.06  | 2 |
| -11 | -1 | -6 | 43.10   | 12.17 | 2 |
| -12 | -1 | -6 | 192.78  | 23.69 | 2 |
| -13 | -1 | -6 | 23.66   | 10.03 | 2 |
| -17 | 2  | 6  | 0.41    | 6.66  | 3 |
| -16 | 2  | 6  | -2.27   | 7.19  | 3 |
| -15 | 2  | 6  | 176.54  | 21.66 | 3 |
| -14 | 2  | 6  | 8.37    | 7.08  | 3 |
| -13 | 2  | 6  | 99.75   | 15.62 | 3 |
| -12 | 2  | 6  | 351.51  | 24.88 | 3 |
| -11 | 2  | 6  | 266.31  | 20.33 | 3 |
| 10  | -2 | -6 | 988.93  | 35.88 | 1 |

-10 2 6 940.59 41.67 3  
9 -2 -6 602.62 24.73 1  
-9 2 6 528.62 27.90 3  
-8 2 6 36.87 7.58 3  
-8 2 6 49.14 5.43 2  
-7 2 6 182.73 13.30 3  
-7 2 6 182.56 9.44 2  
7 -2 -6 194.74 12.16 1  
-6 2 6 975.26 37.75 3  
6 -2 -6 943.52 35.36 1  
-6 2 6 991.00 31.63 2  
-5 2 6 11.46 4.30 3  
5 -2 -6 19.80 4.93 1  
4 -2 -6 45.98 6.29 1  
-4 2 6 48.71 7.24 3  
-3 2 6 98.38 9.92 3  
3 -2 -6 100.25 8.67 1  
2 -2 -6 -0.95 1.88 1  
1 -2 -6 426.76 19.48 1  
0 -2 -6 21.45 4.70 1  
-1 -2 -6 1806.94 58.73 1  
-1 -2 -6 1855.49 61.69 2  
-2 -2 -6 49.07 6.53 1  
-2 -2 -6 36.48 7.08 2  
-3 -2 -6 480.54 20.98 1  
-3 -2 -6 461.13 24.40 2  
-4 -2 -6 38.37 6.17 1  
-4 -2 -6 50.07 9.33 2  
-5 -2 -6 1.23 3.73 2  
-5 -2 -6 0.71 2.75 1  
-6 -2 -6 152.11 16.81 2  
-7 -2 -6 157.60 17.38 2  
-8 -2 -6 8.75 5.25 2  
-9 -2 -6 6.62 6.03 2  
-10 -2 -6 4.08 5.67 2  
-11 -2 -6 18.11 7.83 2  
-12 -2 -6 3.47 7.17 2  
-13 -2 -6 44.92 13.18 2  
-17 3 6 -5.65 7.40 3  
-16 3 6 238.12 25.67 3  
-15 3 6 656.18 39.68 3  
-14 3 6 2.56 6.60 3  
-13 3 6 38.14 10.50 3  
-12 3 6 59.01 11.73 3  
-11 3 6 29.14 8.43 3  
-10 3 6 615.69 31.97 3

|     |    |    |         |       |   |
|-----|----|----|---------|-------|---|
| 10  | -3 | -6 | 666.44  | 26.95 | 1 |
| -9  | 3  | 6  | 31.92   | 7.69  | 3 |
| 9   | -3 | -6 | 56.93   | 7.46  | 1 |
| -8  | 3  | 6  | 913.02  | 38.40 | 3 |
| -8  | 3  | 6  | 949.60  | 32.65 | 2 |
| 7   | -3 | -6 | 2.80    | 2.97  | 1 |
| -7  | 3  | 6  | 1.78    | 2.55  | 2 |
| -7  | 3  | 6  | 2.77    | 3.21  | 3 |
| -6  | 3  | 6  | 240.63  | 15.18 | 3 |
| -6  | 3  | 6  | 232.08  | 11.23 | 2 |
| 6   | -3 | -6 | 192.75  | 12.44 | 1 |
| -5  | 3  | 6  | 369.38  | 19.55 | 3 |
| 5   | -3 | -6 | 380.31  | 18.58 | 1 |
| -4  | 3  | 6  | 356.89  | 19.14 | 3 |
| 4   | -3 | -6 | 371.64  | 18.27 | 1 |
| 3   | -3 | -6 | 1012.64 | 37.07 | 1 |
| 2   | -3 | -6 | 293.02  | 15.79 | 1 |
| 1   | -3 | -6 | 777.98  | 30.46 | 1 |
| 0   | -3 | -6 | 222.92  | 13.49 | 1 |
| -1  | -3 | -6 | 926.15  | 34.53 | 1 |
| -2  | -3 | -6 | 235.49  | 13.75 | 1 |
| -2  | -3 | -6 | 208.89  | 15.21 | 2 |
| -3  | -3 | -6 | 119.57  | 9.75  | 1 |
| -3  | -3 | -6 | 108.90  | 12.64 | 2 |
| -4  | -3 | -6 | 70.04   | 8.08  | 1 |
| -4  | -3 | -6 | 47.73   | 9.34  | 2 |
| -5  | -3 | -6 | 5.99    | 3.97  | 1 |
| -5  | -3 | -6 | 9.19    | 5.67  | 2 |
| -6  | -3 | -6 | 48.99   | 10.89 | 2 |
| -7  | -3 | -6 | 99.13   | 15.22 | 2 |
| -8  | -3 | -6 | 21.65   | 7.71  | 2 |
| -9  | -3 | -6 | 317.53  | 25.09 | 2 |
| -10 | -3 | -6 | 220.13  | 24.41 | 2 |
| -11 | -3 | -6 | 16.13   | 8.67  | 2 |
| -12 | -3 | -6 | 15.29   | 9.85  | 2 |
| -18 | 4  | 6  | -1.63   | 5.62  | 3 |
| -17 | 4  | 6  | -1.68   | 7.15  | 3 |
| -16 | 4  | 6  | 8.13    | 8.14  | 3 |
| -15 | 4  | 6  | 1.81    | 7.00  | 3 |
| -14 | 4  | 6  | 176.22  | 20.03 | 3 |
| -13 | 4  | 6  | 57.04   | 11.98 | 3 |
| -12 | 4  | 6  | 344.41  | 23.95 | 3 |
| -11 | 4  | 6  | 5.91    | 5.80  | 3 |
| -10 | 4  | 6  | 3.62    | 4.54  | 3 |
| 10  | -4 | -6 | -0.35   | 3.03  | 1 |
| -9  | 4  | 6  | 913.83  | 33.02 | 2 |



|     |    |    |         |       |   |
|-----|----|----|---------|-------|---|
| -9  | 4  | 6  | 863.77  | 38.03 | 3 |
| 9   | -4 | -6 | 858.25  | 33.77 | 1 |
| 8   | -4 | -6 | 114.84  | 9.98  | 1 |
| -8  | 4  | 6  | 144.59  | 12.48 | 3 |
| -8  | 4  | 6  | 168.43  | 10.34 | 2 |
| -7  | 4  | 6  | 292.96  | 18.35 | 3 |
| 7   | -4 | -6 | 309.31  | 16.65 | 1 |
| -7  | 4  | 6  | 311.61  | 15.14 | 2 |
| -6  | 4  | 6  | 152.09  | 12.19 | 3 |
| 6   | -4 | -6 | 121.90  | 10.55 | 1 |
| -6  | 4  | 6  | 145.05  | 9.63  | 2 |
| -5  | 4  | 6  | 1112.52 | 42.92 | 3 |
| 5   | -4 | -6 | 1140.40 | 41.48 | 1 |
| -4  | 4  | 6  | 0.39    | 3.71  | 3 |
| 4   | -4 | -6 | 1.17    | 2.78  | 1 |
| 3   | -4 | -6 | 425.08  | 20.81 | 1 |
| 2   | -4 | -6 | 332.82  | 17.48 | 1 |
| 1   | -4 | -6 | 881.39  | 33.86 | 1 |
| 0   | -4 | -6 | 799.36  | 31.58 | 1 |
| -1  | -4 | -6 | 260.38  | 15.33 | 1 |
| -2  | -4 | -6 | 1.08    | 3.21  | 1 |
| -3  | -4 | -6 | 154.91  | 15.51 | 2 |
| -3  | -4 | -6 | 160.70  | 12.19 | 1 |
| -4  | -4 | -6 | 183.56  | 15.93 | 2 |
| -4  | -4 | -6 | 171.47  | 12.91 | 1 |
| -5  | -4 | -6 | 1.83    | 4.17  | 1 |
| -5  | -4 | -6 | 2.16    | 4.73  | 2 |
| -6  | -4 | -6 | 10.70   | 6.00  | 2 |
| -7  | -4 | -6 | 24.24   | 7.62  | 2 |
| -8  | -4 | -6 | 10.08   | 5.82  | 2 |
| -9  | -4 | -6 | 60.59   | 13.88 | 2 |
| -10 | -4 | -6 | 32.09   | 10.07 | 2 |
| -11 | -4 | -6 | 180.18  | 24.14 | 2 |
| -12 | -4 | -6 | -3.84   | 7.16  | 2 |
| -18 | 5  | 6  | -4.18   | 6.24  | 3 |
| -17 | 5  | 6  | 24.62   | 10.49 | 3 |
| -16 | 5  | 6  | 4.12    | 7.78  | 3 |
| -15 | 5  | 6  | -0.33   | 6.70  | 3 |
| -14 | 5  | 6  | 204.78  | 21.62 | 3 |
| -13 | 5  | 6  | 7.34    | 6.75  | 3 |
| -12 | 5  | 6  | -0.80   | 4.91  | 3 |
| -11 | 5  | 6  | 324.31  | 22.30 | 3 |
| 10  | -5 | -6 | 118.50  | 11.08 | 1 |
| -10 | 5  | 6  | 128.79  | 14.00 | 3 |
| -9  | 5  | 6  | 223.42  | 16.43 | 3 |
| -9  | 5  | 6  | 228.78  | 13.90 | 2 |

|     |    |    |         |       |   |
|-----|----|----|---------|-------|---|
| -8  | 5  | 6  | 18.62   | 5.14  | 2 |
| 8   | -5 | -6 | 14.47   | 5.06  | 1 |
| -8  | 5  | 6  | 19.79   | 6.09  | 3 |
| -7  | 5  | 6  | 14.54   | 4.42  | 2 |
| -7  | 5  | 6  | 11.19   | 5.16  | 3 |
| 7   | -5 | -6 | 15.52   | 4.96  | 1 |
| -6  | 5  | 6  | 1264.01 | 47.73 | 3 |
| 6   | -5 | -6 | 1275.42 | 45.51 | 1 |
| -6  | 5  | 6  | 1222.14 | 43.41 | 2 |
| -5  | 5  | 6  | 1103.87 | 42.85 | 3 |
| 5   | -5 | -6 | 1076.86 | 40.81 | 1 |
| 4   | -5 | -6 | 51.57   | 7.88  | 1 |
| 3   | -5 | -6 | 14.79   | 4.89  | 1 |
| 2   | -5 | -6 | 401.70  | 20.44 | 1 |
| 1   | -5 | -6 | 38.90   | 7.05  | 1 |
| 0   | -5 | -6 | 182.23  | 13.33 | 1 |
| -1  | -5 | -6 | 90.28   | 10.14 | 1 |
| -2  | -5 | -6 | 968.69  | 37.60 | 1 |
| -3  | -5 | -6 | 13.45   | 5.32  | 1 |
| -4  | -5 | -6 | 79.42   | 13.14 | 2 |
| -4  | -5 | -6 | 93.18   | 10.76 | 1 |
| -5  | -5 | -6 | 250.10  | 16.56 | 1 |
| -5  | -5 | -6 | 228.48  | 19.75 | 2 |
| -6  | -5 | -6 | 4.87    | 4.66  | 2 |
| -7  | -5 | -6 | 712.31  | 39.94 | 2 |
| -8  | -5 | -6 | 95.11   | 16.33 | 2 |
| -9  | -5 | -6 | 2.57    | 5.22  | 2 |
| -10 | -5 | -6 | 130.36  | 20.46 | 2 |
| -11 | -5 | -6 | 30.75   | 11.78 | 2 |
| -18 | 6  | 6  | -8.09   | 6.14  | 3 |
| -17 | 6  | 6  | 10.72   | 9.58  | 3 |
| -16 | 6  | 6  | 7.01    | 8.26  | 3 |
| -15 | 6  | 6  | 20.98   | 9.92  | 3 |
| -14 | 6  | 6  | 75.53   | 14.33 | 3 |
| -13 | 6  | 6  | 36.71   | 10.27 | 3 |
| -12 | 6  | 6  | 120.55  | 15.33 | 3 |
| -11 | 6  | 6  | 74.12   | 12.11 | 3 |
| -10 | 6  | 6  | 8.61    | 5.16  | 3 |
| 10  | -6 | -6 | 1.12    | 3.87  | 1 |
| -9  | 6  | 6  | 1.17    | 3.45  | 2 |
| -9  | 6  | 6  | 6.04    | 4.51  | 3 |
| 9   | -6 | -6 | 2.30    | 3.54  | 1 |
| 8   | -6 | -6 | 53.65   | 8.30  | 1 |
| -8  | 6  | 6  | 46.68   | 8.83  | 3 |
| -8  | 6  | 6  | 58.90   | 8.12  | 2 |
| 7   | -6 | -6 | 290.41  | 17.51 | 1 |

|     |    |    |         |       |   |
|-----|----|----|---------|-------|---|
| -7  | 6  | 6  | 296.39  | 18.90 | 3 |
| -7  | 6  | 6  | 298.02  | 16.43 | 2 |
| 6   | -6 | -6 | 4.91    | 4.27  | 1 |
| -6  | 6  | 6  | 2.23    | 3.25  | 2 |
| -6  | 6  | 6  | 11.63   | 5.77  | 3 |
| -5  | 6  | 6  | 11.81   | 5.83  | 3 |
| 5   | -6 | -6 | 24.17   | 6.38  | 1 |
| 4   | -6 | -6 | 372.59  | 20.03 | 1 |
| 3   | -6 | -6 | 138.54  | 11.95 | 1 |
| 2   | -6 | -6 | 286.20  | 17.33 | 1 |
| 1   | -6 | -6 | -1.07   | 2.97  | 1 |
| 0   | -6 | -6 | -0.75   | 3.59  | 1 |
| -1  | -6 | -6 | 1234.67 | 46.43 | 1 |
| -2  | -6 | -6 | 581.15  | 27.61 | 1 |
| -3  | -6 | -6 | 565.86  | 27.41 | 1 |
| -4  | -6 | -6 | 1.11    | 4.51  | 2 |
| -4  | -6 | -6 | 6.24    | 4.42  | 1 |
| -5  | -6 | -6 | 165.99  | 19.08 | 2 |
| -5  | -6 | -6 | 164.63  | 13.98 | 1 |
| -6  | -6 | -6 | 0.06    | 4.04  | 2 |
| -7  | -6 | -6 | 138.48  | 19.95 | 2 |
| -8  | -6 | -6 | 10.72   | 6.86  | 2 |
| -9  | -6 | -6 | 189.25  | 24.19 | 2 |
| -10 | -6 | -6 | 13.38   | 8.14  | 2 |
| -11 | -6 | -6 | 54.80   | 15.42 | 2 |
| -17 | 7  | 6  | 2.32    | 8.19  | 3 |
| -16 | 7  | 6  | -1.93   | 7.35  | 3 |
| -15 | 7  | 6  | 36.81   | 11.33 | 3 |
| -14 | 7  | 6  | 2.00    | 6.83  | 3 |
| -13 | 7  | 6  | 99.21   | 15.13 | 3 |
| -12 | 7  | 6  | 139.69  | 16.08 | 3 |
| -11 | 7  | 6  | 8.72    | 5.84  | 3 |
| -10 | 7  | 6  | 380.12  | 23.54 | 3 |
| 10  | -7 | -6 | 349.17  | 20.21 | 1 |
| -10 | 7  | 6  | 355.88  | 20.37 | 2 |
| -9  | 7  | 6  | 0.69    | 4.09  | 2 |
| -9  | 7  | 6  | 2.95    | 4.63  | 3 |
| 9   | -7 | -6 | 2.52    | 4.17  | 1 |
| -8  | 7  | 6  | 906.14  | 36.67 | 2 |
| 8   | -7 | -6 | 954.54  | 37.54 | 1 |
| -8  | 7  | 6  | 898.84  | 39.32 | 3 |
| -7  | 7  | 6  | 543.77  | 26.06 | 2 |
| -7  | 7  | 6  | 573.77  | 28.62 | 3 |
| 7   | -7 | -6 | 553.70  | 26.64 | 1 |
| -6  | 7  | 6  | 11.15   | 6.01  | 3 |
| 6   | -7 | -6 | 4.54    | 4.15  | 1 |

|     |    |    |        |       |   |
|-----|----|----|--------|-------|---|
| -6  | 7  | 6  | 5.14   | 4.11  | 2 |
| 5   | -7 | -6 | 0.98   | 3.63  | 1 |
| 4   | -7 | -6 | 14.95  | 5.64  | 1 |
| 3   | -7 | -6 | 359.34 | 20.19 | 1 |
| 2   | -7 | -6 | 31.84  | 7.57  | 1 |
| 1   | -7 | -6 | 71.39  | 10.21 | 1 |
| 0   | -7 | -6 | 492.78 | 25.66 | 1 |
| -1  | -7 | -6 | 9.81   | 5.08  | 1 |
| -2  | -7 | -6 | 5.03   | 4.83  | 1 |
| -3  | -7 | -6 | 41.11  | 8.99  | 1 |
| -4  | -7 | -6 | 36.77  | 8.52  | 1 |
| -5  | -7 | -6 | 374.02 | 26.97 | 2 |
| -5  | -7 | -6 | 349.48 | 21.64 | 1 |
| -6  | -7 | -6 | 2.27   | 5.67  | 2 |
| -7  | -7 | -6 | 63.93  | 13.92 | 2 |
| -8  | -7 | -6 | 123.59 | 20.36 | 2 |
| -9  | -7 | -6 | 6.78   | 6.98  | 2 |
| -10 | -7 | -6 | -6.84  | 8.76  | 2 |
| -17 | 8  | 6  | 22.01  | 10.68 | 3 |
| -16 | 8  | 6  | 1.72   | 7.99  | 3 |
| -15 | 8  | 6  | 0.62   | 7.33  | 3 |
| -14 | 8  | 6  | 35.72  | 11.17 | 3 |
| -13 | 8  | 6  | 125.52 | 16.29 | 3 |
| -12 | 8  | 6  | 1.53   | 6.04  | 3 |
| -11 | 8  | 6  | 64.26  | 12.10 | 3 |
| -10 | 8  | 6  | 231.14 | 16.68 | 2 |
| -10 | 8  | 6  | 226.58 | 18.29 | 3 |
| -9  | 8  | 6  | 7.80   | 5.31  | 2 |
| 9   | -8 | -6 | -0.52  | 4.08  | 1 |
| -9  | 8  | 6  | 3.48   | 5.15  | 3 |
| -8  | 8  | 6  | 66.43  | 10.95 | 3 |
| 8   | -8 | -6 | 83.09  | 10.69 | 1 |
| -8  | 8  | 6  | 63.90  | 9.73  | 2 |
| 7   | -8 | -6 | 1.58   | 4.42  | 1 |
| -7  | 8  | 6  | 9.32   | 6.13  | 3 |
| -7  | 8  | 6  | 1.29   | 4.40  | 2 |
| -6  | 8  | 6  | 138.97 | 13.55 | 2 |
| 6   | -8 | -6 | 143.65 | 12.71 | 1 |
| -6  | 8  | 6  | 143.43 | 14.87 | 3 |
| 5   | -8 | -6 | 24.96  | 7.03  | 1 |
| 4   | -8 | -6 | 30.62  | 7.22  | 1 |
| 3   | -8 | -6 | 17.13  | 5.74  | 1 |
| 2   | -8 | -6 | 50.87  | 9.23  | 1 |
| 1   | -8 | -6 | 469.67 | 25.46 | 1 |
| 0   | -8 | -6 | 584.20 | 29.33 | 1 |
| -1  | -8 | -6 | 52.60  | 9.69  | 1 |

|     |    |    |        |       |   |
|-----|----|----|--------|-------|---|
| -2  | -8 | -6 | 9.92   | 5.45  | 1 |
| -3  | -8 | -6 | 53.52  | 10.56 | 1 |
| -4  | -8 | -6 | 2.69   | 5.29  | 1 |
| -5  | -8 | -6 | -0.36  | 5.38  | 1 |
| -5  | -8 | -6 | -0.01  | 5.59  | 2 |
| -6  | -8 | -6 | 152.39 | 21.12 | 2 |
| -7  | -8 | -6 | 13.61  | 8.29  | 2 |
| -8  | -8 | -6 | -2.64  | 6.91  | 2 |
| -9  | -8 | -6 | 0.25   | 7.43  | 2 |
| -10 | -8 | -6 | 23.54  | 11.48 | 2 |
| -17 | 9  | 6  | 8.71   | 8.52  | 3 |
| -16 | 9  | 6  | 2.38   | 8.26  | 3 |
| -15 | 9  | 6  | 17.56  | 9.03  | 3 |
| -14 | 9  | 6  | 175.44 | 19.97 | 3 |
| -13 | 9  | 6  | -4.39  | 5.81  | 3 |
| -12 | 9  | 6  | 23.04  | 9.29  | 3 |
| -11 | 9  | 6  | 233.10 | 19.50 | 3 |
| -10 | 9  | 6  | 7.49   | 5.99  | 3 |
| 10  | -9 | -6 | 22.42  | 6.66  | 1 |
| -10 | 9  | 6  | 10.82  | 6.09  | 2 |
| 9   | -9 | -6 | 99.66  | 12.05 | 1 |
| -9  | 9  | 6  | 113.31 | 12.98 | 2 |
| -9  | 9  | 6  | 97.00  | 13.35 | 3 |
| -8  | 9  | 6  | -1.78  | 4.45  | 3 |
| -8  | 9  | 6  | 0.75   | 5.35  | 2 |
| 8   | -9 | -6 | 1.83   | 4.10  | 1 |
| -7  | 9  | 6  | 102.32 | 13.57 | 3 |
| 7   | -9 | -6 | 69.07  | 10.44 | 1 |
| -7  | 9  | 6  | 77.72  | 11.34 | 2 |
| 6   | -9 | -6 | -0.82  | 4.46  | 1 |
| 5   | -9 | -6 | 20.26  | 7.17  | 1 |
| 4   | -9 | -6 | 1.14   | 4.42  | 1 |
| 3   | -9 | -6 | 38.57  | 8.71  | 1 |
| 2   | -9 | -6 | 53.38  | 10.36 | 1 |
| 1   | -9 | -6 | 5.57   | 4.80  | 1 |
| 0   | -9 | -6 | 1.39   | 4.87  | 1 |
| -1  | -9 | -6 | 24.87  | 7.37  | 1 |
| -2  | -9 | -6 | 257.56 | 19.18 | 1 |
| -3  | -9 | -6 | 105.71 | 14.01 | 1 |
| -4  | -9 | -6 | 2.77   | 5.36  | 1 |
| -5  | -9 | -6 | -2.89  | 5.58  | 1 |
| -6  | -9 | -6 | 6.79   | 6.65  | 2 |
| -7  | -9 | -6 | 4.30   | 6.21  | 2 |
| -8  | -9 | -6 | 12.52  | 9.40  | 2 |
| -9  | -9 | -6 | 51.24  | 15.49 | 2 |
| -17 | 10 | 6  | 54.67  | 14.85 | 3 |

|     |     |    |        |       |   |
|-----|-----|----|--------|-------|---|
| -16 | 10  | 6  | -9.20  | 7.34  | 3 |
| -15 | 10  | 6  | 22.74  | 10.53 | 3 |
| -14 | 10  | 6  | 44.72  | 12.81 | 3 |
| -13 | 10  | 6  | 46.44  | 12.00 | 3 |
| -12 | 10  | 6  | 13.39  | 8.71  | 3 |
| -11 | 10  | 6  | 33.26  | 9.23  | 3 |
| -10 | 10  | 6  | 417.61 | 24.92 | 2 |
| 10  | -10 | -6 | 427.16 | 24.23 | 1 |
| -10 | 10  | 6  | 448.07 | 27.39 | 3 |
| -9  | 10  | 6  | 86.55  | 13.75 | 3 |
| 9   | -10 | -6 | 118.26 | 13.70 | 1 |
| -9  | 10  | 6  | 119.74 | 13.94 | 2 |
| -8  | 10  | 6  | 157.58 | 16.72 | 3 |
| 8   | -10 | -6 | 145.77 | 14.61 | 1 |
| -8  | 10  | 6  | 133.65 | 14.75 | 2 |
| -7  | 10  | 6  | 11.25  | 5.82  | 2 |
| 7   | -10 | -6 | 3.59   | 5.23  | 1 |
| 6   | -10 | -6 | 28.41  | 8.16  | 1 |
| 5   | -10 | -6 | 179.35 | 15.87 | 1 |
| 4   | -10 | -6 | 36.08  | 8.90  | 1 |
| 3   | -10 | -6 | 34.81  | 9.90  | 1 |
| 2   | -10 | -6 | 280.49 | 20.03 | 1 |
| 1   | -10 | -6 | 51.73  | 10.52 | 1 |
| 0   | -10 | -6 | 7.26   | 6.07  | 1 |
| -1  | -10 | -6 | 11.97  | 6.28  | 1 |
| -2  | -10 | -6 | 30.83  | 9.19  | 1 |
| -3  | -10 | -6 | 0.27   | 5.69  | 1 |
| -4  | -10 | -6 | 44.73  | 10.51 | 1 |
| -5  | -10 | -6 | 49.55  | 10.87 | 1 |
| -6  | -10 | -6 | 2.15   | 7.21  | 2 |
| -7  | -10 | -6 | -4.65  | 6.58  | 2 |
| -8  | -10 | -6 | 9.16   | 10.15 | 2 |
| -16 | 11  | 6  | 138.48 | 20.99 | 3 |
| -15 | 11  | 6  | 14.63  | 9.51  | 3 |
| -14 | 11  | 6  | 24.72  | 10.86 | 3 |
| -13 | 11  | 6  | 6.77   | 7.66  | 3 |
| -12 | 11  | 6  | 0.49   | 6.94  | 3 |
| -11 | 11  | 6  | 173.21 | 18.91 | 3 |
| -10 | 11  | 6  | 55.30  | 12.70 | 3 |
| 10  | -11 | -6 | 81.10  | 12.34 | 1 |
| -10 | 11  | 6  | 77.16  | 12.55 | 2 |
| 9   | -11 | -6 | 35.06  | 9.19  | 1 |
| -9  | 11  | 6  | 34.15  | 9.10  | 2 |
| -9  | 11  | 6  | 26.09  | 9.85  | 3 |
| -8  | 11  | 6  | -4.55  | 5.28  | 3 |
| -8  | 11  | 6  | -10.70 | 4.24  | 2 |

|     |     |    |        |       |   |
|-----|-----|----|--------|-------|---|
| 8   | -11 | -6 | -3.32  | 5.15  | 1 |
| 7   | -11 | -6 | 136.24 | 15.60 | 1 |
| 6   | -11 | -6 | 2.16   | 5.57  | 1 |
| 5   | -11 | -6 | -1.27  | 5.58  | 1 |
| 4   | -11 | -6 | 77.91  | 13.24 | 1 |
| 3   | -11 | -6 | 12.89  | 7.44  | 1 |
| 2   | -11 | -6 | -3.75  | 4.43  | 1 |
| 1   | -11 | -6 | 13.15  | 7.17  | 1 |
| 0   | -11 | -6 | 8.44   | 6.30  | 1 |
| -1  | -11 | -6 | 81.09  | 13.61 | 1 |
| -2  | -11 | -6 | -0.10  | 6.34  | 1 |
| -3  | -11 | -6 | 3.28   | 6.11  | 1 |
| -4  | -11 | -6 | 1.83   | 7.26  | 1 |
| -5  | -11 | -6 | 9.99   | 8.07  | 1 |
| -6  | -11 | -6 | -13.06 | 7.16  | 2 |
| -7  | -11 | -6 | 33.31  | 12.82 | 2 |
| -11 | 12  | 6  | 57.31  | 11.91 | 2 |
| -10 | 12  | 6  | 66.50  | 14.06 | 3 |
| 10  | -12 | -6 | 45.65  | 11.03 | 1 |
| -10 | 12  | 6  | 52.54  | 11.22 | 2 |
| 9   | -12 | -6 | 27.52  | 9.30  | 1 |
| -9  | 12  | 6  | 40.02  | 11.28 | 3 |
| -9  | 12  | 6  | 39.73  | 9.90  | 2 |
| 8   | -12 | -6 | 73.27  | 12.89 | 1 |
| -8  | 12  | 6  | 91.35  | 14.30 | 2 |
| 7   | -12 | -6 | 191.98 | 18.32 | 1 |
| 6   | -12 | -6 | 0.68   | 5.47  | 1 |
| 5   | -12 | -6 | 10.65  | 7.18  | 1 |
| 4   | -12 | -6 | -3.67  | 5.68  | 1 |
| 3   | -12 | -6 | 6.39   | 6.59  | 1 |
| 2   | -12 | -6 | -2.29  | 5.81  | 1 |
| 1   | -12 | -6 | 73.90  | 13.26 | 1 |
| 0   | -12 | -6 | 138.87 | 17.65 | 1 |
| -1  | -12 | -6 | 34.00  | 10.31 | 1 |
| -2  | -12 | -6 | 8.49   | 7.57  | 1 |
| -3  | -12 | -6 | 6.95   | 7.45  | 1 |
| -4  | -12 | -6 | 2.70   | 7.73  | 1 |
| -6  | -12 | -6 | 63.20  | 17.81 | 2 |
| -11 | 13  | 6  | 140.20 | 18.06 | 2 |
| 10  | -13 | -6 | 70.95  | 12.33 | 1 |
| -10 | 13  | 6  | 56.43  | 12.12 | 2 |
| -9  | 13  | 6  | 128.06 | 17.32 | 2 |
| 9   | -13 | -6 | 94.35  | 14.00 | 1 |
| 8   | -13 | -6 | 11.54  | 7.77  | 1 |
| 7   | -13 | -6 | 36.05  | 10.45 | 1 |
| 6   | -13 | -6 | 369.97 | 25.41 | 1 |

|     |     |    |        |       |   |
|-----|-----|----|--------|-------|---|
| 5   | -13 | -6 | 22.62  | 8.87  | 1 |
| 4   | -13 | -6 | 126.01 | 17.74 | 1 |
| 3   | -13 | -6 | 22.58  | 10.41 | 1 |
| 2   | -13 | -6 | 5.55   | 7.67  | 1 |
| 1   | -13 | -6 | 225.76 | 22.15 | 1 |
| 0   | -13 | -6 | 17.21  | 8.76  | 1 |
| -1  | -13 | -6 | 75.35  | 14.65 | 1 |
| -2  | -13 | -6 | -2.59  | 6.44  | 1 |
| -3  | -13 | -6 | 35.72  | 11.15 | 1 |
| -4  | -13 | -6 | 1.31   | 9.11  | 1 |
| -11 | 14  | 6  | 0.55   | 6.03  | 2 |
| -10 | 14  | 6  | 171.78 | 20.67 | 2 |
| 10  | -14 | -6 | 173.61 | 18.34 | 1 |
| 9   | -14 | -6 | 7.74   | 7.77  | 1 |
| -9  | 14  | 6  | 7.54   | 7.85  | 2 |
| 8   | -14 | -6 | 11.05  | 9.11  | 1 |
| 7   | -14 | -6 | 140.54 | 17.69 | 1 |
| 6   | -14 | -6 | 91.62  | 16.01 | 1 |
| 5   | -14 | -6 | 295.45 | 24.51 | 1 |
| 4   | -14 | -6 | 5.14   | 9.73  | 1 |
| 3   | -14 | -6 | 192.39 | 22.16 | 1 |
| 2   | -14 | -6 | 10.00  | 8.06  | 1 |
| 1   | -14 | -6 | -6.48  | 5.96  | 1 |
| 0   | -14 | -6 | 21.64  | 9.46  | 1 |
| -1  | -14 | -6 | 82.62  | 16.10 | 1 |
| -2  | -14 | -6 | 14.07  | 9.22  | 1 |
| -3  | -14 | -6 | 75.21  | 15.79 | 1 |
| -4  | -14 | -6 | 5.12   | 9.48  | 1 |
| -11 | 15  | 6  | 9.00   | 8.03  | 2 |
| -10 | 15  | 6  | 7.34   | 7.96  | 2 |
| 10  | -15 | -6 | 4.67   | 7.84  | 1 |
| 9   | -15 | -6 | 167.52 | 19.64 | 1 |
| 8   | -15 | -6 | 197.40 | 21.00 | 1 |
| 7   | -15 | -6 | 10.76  | 9.32  | 1 |
| 6   | -15 | -6 | 13.86  | 10.99 | 1 |
| 5   | -15 | -6 | 42.28  | 12.90 | 1 |
| 4   | -15 | -6 | -3.35  | 9.49  | 1 |
| 3   | -15 | -6 | 46.80  | 13.65 | 1 |
| 2   | -15 | -6 | 10.04  | 9.21  | 1 |
| 1   | -15 | -6 | 55.62  | 13.29 | 1 |
| 0   | -15 | -6 | -9.76  | 8.19  | 1 |
| -1  | -15 | -6 | 32.63  | 12.21 | 1 |
| -2  | -15 | -6 | 7.55   | 9.82  | 1 |
| -3  | -15 | -6 | 21.61  | 13.62 | 1 |
| -11 | 16  | 6  | -2.49  | 7.01  | 2 |
| 10  | -16 | -6 | 3.78   | 8.89  | 1 |



|    |     |    |        |       |   |
|----|-----|----|--------|-------|---|
| 9  | -16 | -6 | 9.21   | 9.08  | 1 |
| 8  | -16 | -6 | 19.29  | 9.62  | 1 |
| 7  | -16 | -6 | 106.48 | 17.23 | 1 |
| 6  | -16 | -6 | 3.44   | 9.87  | 1 |
| 5  | -16 | -6 | 87.37  | 17.10 | 1 |
| 4  | -16 | -6 | 80.03  | 17.91 | 1 |
| 3  | -16 | -6 | 4.06   | 10.06 | 1 |
| 2  | -16 | -6 | 90.13  | 16.84 | 1 |
| 1  | -16 | -6 | -6.12  | 8.42  | 1 |
| 0  | -16 | -6 | 80.76  | 17.59 | 1 |
| -1 | -16 | -6 | -14.78 | 8.96  | 1 |
| 10 | -17 | -6 | 41.98  | 12.52 | 1 |
| 9  | -17 | -6 | 2.23   | 9.13  | 1 |
| 8  | -17 | -6 | 11.07  | 9.42  | 1 |
| 7  | -17 | -6 | 1.32   | 7.91  | 1 |
| 6  | -17 | -6 | 34.98  | 12.25 | 1 |
| 5  | -17 | -6 | 3.95   | 9.15  | 1 |
| 4  | -17 | -6 | -9.08  | 7.38  | 1 |
| 3  | -17 | -6 | -12.72 | 9.05  | 1 |
| 2  | -17 | -6 | 8.22   | 11.60 | 1 |
| 1  | -17 | -6 | 5.92   | 10.88 | 1 |
| 9  | -18 | -6 | -1.48  | 9.32  | 1 |
| 8  | -18 | -6 | 59.56  | 14.18 | 1 |
| 7  | -18 | -6 | 3.17   | 7.99  | 1 |
| 6  | -18 | -6 | -11.77 | 6.83  | 1 |
| 5  | -18 | -6 | 4.28   | 7.81  | 1 |
| 0  | -20 | 7  | -1.71  | 6.24  | 4 |
| 0  | -20 | 7  | 2.25   | 7.02  | 1 |
| 1  | -20 | 7  | 1.30   | 6.03  | 1 |
| 1  | -20 | 7  | -7.54  | 6.04  | 4 |
| 2  | -20 | 7  | -6.87  | 5.96  | 4 |
| 2  | -20 | 7  | 1.69   | 6.98  | 1 |
| 3  | -20 | 7  | 8.97   | 8.59  | 4 |
| -3 | 20  | -7 | 9.89   | 9.75  | 2 |
| 3  | -20 | 7  | 9.18   | 8.71  | 1 |
| 4  | -20 | 7  | 38.20  | 13.06 | 4 |
| -4 | 20  | -7 | 3.14   | 7.72  | 2 |
| 4  | -20 | 7  | 40.45  | 12.16 | 1 |
| 5  | -20 | 7  | 70.39  | 14.72 | 1 |
| 5  | -20 | 7  | 73.56  | 15.09 | 4 |
| -6 | 20  | -7 | 6.86   | 7.71  | 2 |
| -7 | 20  | -7 | -2.27  | 6.48  | 2 |
| -3 | -19 | 7  | 9.15   | 9.28  | 4 |
| -3 | -19 | 7  | 5.06   | 11.69 | 1 |
| -2 | -19 | 7  | 2.74   | 10.32 | 1 |
| -2 | -19 | 7  | 3.77   | 7.89  | 4 |

|    |     |    |        |       |   |
|----|-----|----|--------|-------|---|
| -1 | -19 | 7  | -3.17  | 6.95  | 4 |
| -1 | -19 | 7  | -13.94 | 6.32  | 1 |
| 0  | -19 | 7  | -10.26 | 6.58  | 4 |
| 0  | -19 | 7  | -4.76  | 7.81  | 1 |
| 1  | -19 | 7  | 137.67 | 18.71 | 4 |
| 2  | -19 | 7  | 11.91  | 9.88  | 1 |
| -2 | 19  | -7 | 36.91  | 13.35 | 2 |
| 2  | -19 | 7  | 20.97  | 9.54  | 4 |
| 3  | -19 | 7  | -9.96  | 7.15  | 1 |
| -3 | 19  | -7 | -1.67  | 8.92  | 2 |
| 3  | -19 | 7  | 2.79   | 7.13  | 4 |
| 4  | -19 | 7  | 145.99 | 18.83 | 1 |
| 4  | -19 | 7  | 141.18 | 18.57 | 4 |
| -4 | 19  | -7 | 121.17 | 19.39 | 2 |
| 5  | -19 | 7  | 13.45  | 9.30  | 4 |
| 5  | -19 | 7  | 25.05  | 10.36 | 1 |
| -5 | 19  | -7 | 20.49  | 10.35 | 2 |
| -6 | 19  | -7 | 3.95   | 8.50  | 2 |
| -7 | 19  | -7 | -0.10  | 7.00  | 2 |
| -8 | 19  | -7 | -0.61  | 6.18  | 2 |
| -9 | 19  | -7 | -1.67  | 6.01  | 2 |
| -5 | -18 | 7  | 329.37 | 33.46 | 1 |
| -5 | -18 | 7  | 355.28 | 29.74 | 4 |
| -4 | -18 | 7  | 9.26   | 8.70  | 4 |
| -4 | -18 | 7  | 1.85   | 10.99 | 1 |
| -3 | -18 | 7  | 71.49  | 16.87 | 1 |
| -3 | -18 | 7  | 43.56  | 11.93 | 4 |
| -2 | -18 | 7  | 6.15   | 7.34  | 4 |
| -2 | -18 | 7  | 6.36   | 9.78  | 1 |
| -1 | -18 | 7  | 20.64  | 10.38 | 4 |
| -1 | -18 | 7  | 26.83  | 11.37 | 1 |
| 0  | -18 | 7  | 18.99  | 10.56 | 1 |
| 0  | -18 | 7  | 44.03  | 12.04 | 4 |
| -1 | 18  | -7 | -0.43  | 8.32  | 2 |
| 1  | -18 | 7  | -15.25 | 6.72  | 1 |
| 1  | -18 | 7  | 0.34   | 7.71  | 4 |
| 2  | -18 | 7  | 341.68 | 25.22 | 1 |
| 2  | -18 | 7  | 303.17 | 24.14 | 4 |
| -2 | 18  | -7 | 339.14 | 27.72 | 2 |
| 3  | -18 | 7  | 109.49 | 16.43 | 4 |
| -3 | 18  | -7 | 78.14  | 16.67 | 2 |
| 3  | -18 | 7  | 92.21  | 15.49 | 1 |
| -4 | 18  | -7 | 4.01   | 7.89  | 2 |
| 4  | -18 | 7  | -1.44  | 7.62  | 4 |
| 4  | -18 | 7  | -0.92  | 7.50  | 1 |
| -5 | 18  | -7 | -2.94  | 6.96  | 2 |

|     |     |    |        |       |   |
|-----|-----|----|--------|-------|---|
| 5   | -18 | 7  | 9.93   | 8.17  | 4 |
| 5   | -18 | 7  | 8.55   | 8.83  | 1 |
| -6  | 18  | -7 | 12.15  | 9.26  | 2 |
| -7  | 18  | -7 | 77.62  | 16.85 | 2 |
| -8  | 18  | -7 | -1.70  | 6.84  | 2 |
| -9  | 18  | -7 | -0.19  | 6.57  | 2 |
| -10 | 18  | -7 | 4.36   | 6.66  | 2 |
| -6  | -17 | 7  | 27.65  | 14.54 | 4 |
| -6  | -17 | 7  | 11.67  | 14.02 | 1 |
| -5  | -17 | 7  | -9.02  | 7.41  | 4 |
| -5  | -17 | 7  | 20.48  | 11.06 | 1 |
| 2   | 17  | -7 | 3.37   | 7.72  | 1 |
| 1   | 17  | -7 | 89.29  | 15.56 | 1 |
| 0   | 17  | -7 | -2.04  | 4.87  | 1 |
| -1  | 17  | -7 | 81.22  | 15.92 | 2 |
| -1  | 17  | -7 | 85.41  | 14.61 | 1 |
| -2  | 17  | -7 | 109.07 | 18.08 | 2 |
| -3  | 17  | -7 | 4.93   | 7.34  | 2 |
| -4  | 17  | -7 | 35.60  | 11.08 | 2 |
| 4   | -17 | 7  | 51.53  | 12.07 | 4 |
| 4   | -17 | 7  | 27.30  | 10.02 | 1 |
| 5   | -17 | 7  | 32.17  | 10.17 | 1 |
| -5  | 17  | -7 | 37.58  | 12.01 | 2 |
| 5   | -17 | 7  | 35.94  | 11.30 | 4 |
| 6   | -17 | 7  | 88.01  | 14.08 | 4 |
| -6  | 17  | -7 | 74.50  | 15.79 | 2 |
| 6   | -17 | 7  | 60.40  | 13.26 | 1 |
| -7  | 17  | -7 | 22.69  | 10.19 | 2 |
| -8  | 17  | -7 | 53.93  | 13.81 | 2 |
| -10 | 17  | -7 | 4.11   | 6.78  | 2 |
| -11 | 17  | -7 | 18.03  | 10.96 | 2 |
| -8  | -16 | 7  | 27.94  | 18.03 | 1 |
| -8  | -16 | 7  | -13.20 | 13.03 | 4 |
| 5   | 16  | -7 | -7.67  | 6.05  | 1 |
| 4   | 16  | -7 | 9.66   | 8.62  | 1 |
| 3   | 16  | -7 | 9.09   | 8.22  | 1 |
| 2   | 16  | -7 | -0.67  | 6.36  | 1 |
| 1   | 16  | -7 | 58.75  | 11.79 | 1 |
| 0   | 16  | -7 | 478.30 | 29.58 | 1 |
| 0   | 16  | -7 | 479.94 | 31.27 | 2 |
| -1  | 16  | -7 | -3.27  | 6.37  | 2 |
| -1  | 16  | -7 | 2.38   | 4.71  | 1 |
| -2  | 16  | -7 | 7.17   | 5.20  | 1 |
| -2  | 16  | -7 | 1.05   | 6.44  | 2 |
| -3  | 16  | -7 | 2.86   | 4.36  | 1 |
| -3  | 16  | -7 | -0.18  | 6.61  | 2 |

|     |     |    |        |       |   |
|-----|-----|----|--------|-------|---|
| -4  | 16  | -7 | 3.73   | 4.97  | 1 |
| -4  | 16  | -7 | -0.36  | 6.83  | 2 |
| -5  | 16  | -7 | 146.03 | 19.63 | 2 |
| -6  | 16  | -7 | 2.32   | 6.77  | 2 |
| 6   | -16 | 7  | 12.86  | 7.35  | 4 |
| 6   | -16 | 7  | 8.04   | 6.74  | 1 |
| -7  | 16  | -7 | 34.85  | 11.85 | 2 |
| -8  | 16  | -7 | -2.11  | 7.28  | 2 |
| -9  | 16  | -7 | -2.14  | 6.58  | 2 |
| -10 | 16  | -7 | -7.68  | 6.20  | 2 |
| -11 | 16  | -7 | 5.25   | 7.72  | 2 |
| -12 | 16  | -7 | 204.60 | 27.18 | 2 |
| -9  | -15 | 7  | 134.88 | 25.66 | 4 |
| -9  | -15 | 7  | 111.55 | 26.60 | 1 |
| 7   | 15  | -7 | 76.74  | 16.01 | 1 |
| 6   | 15  | -7 | 158.11 | 20.18 | 1 |
| 5   | 15  | -7 | -3.80  | 7.15  | 1 |
| 4   | 15  | -7 | 55.23  | 13.08 | 1 |
| 3   | 15  | -7 | 7.86   | 7.24  | 1 |
| 2   | 15  | -7 | 3.35   | 6.10  | 1 |
| 1   | 15  | -7 | 50.44  | 10.68 | 1 |
| 0   | 15  | -7 | -0.03  | 5.94  | 2 |
| 0   | 15  | -7 | 0.50   | 4.40  | 1 |
| -1  | 15  | -7 | 64.55  | 11.60 | 1 |
| -1  | 15  | -7 | 71.53  | 13.77 | 2 |
| -2  | 15  | -7 | 52.24  | 11.58 | 2 |
| -2  | 15  | -7 | 45.18  | 9.55  | 1 |
| -3  | 15  | -7 | 18.67  | 6.92  | 1 |
| -3  | 15  | -7 | 12.60  | 7.22  | 2 |
| -4  | 15  | -7 | 216.99 | 17.03 | 1 |
| -4  | 15  | -7 | 154.78 | 19.00 | 2 |
| -5  | 15  | -7 | 39.12  | 8.84  | 1 |
| -5  | 15  | -7 | 57.49  | 13.01 | 2 |
| -6  | 15  | -7 | 11.20  | 7.96  | 2 |
| -7  | 15  | -7 | 39.89  | 12.02 | 2 |
| -8  | 15  | -7 | 30.37  | 11.34 | 2 |
| -9  | 15  | -7 | 1.81   | 6.74  | 2 |
| -10 | 15  | -7 | 4.20   | 8.22  | 2 |
| -11 | 15  | -7 | -5.49  | 6.83  | 2 |
| -12 | 15  | -7 | 100.53 | 19.78 | 2 |
| 9   | 14  | -7 | -3.23  | 7.78  | 1 |
| 8   | 14  | -7 | -12.15 | 6.35  | 1 |
| 7   | 14  | -7 | 5.60   | 7.90  | 1 |
| 6   | 14  | -7 | 8.31   | 7.61  | 1 |
| 5   | 14  | -7 | 19.51  | 9.33  | 1 |
| 4   | 14  | -7 | 18.69  | 8.63  | 1 |

|     |    |    |        |       |   |
|-----|----|----|--------|-------|---|
| 3   | 14 | -7 | 80.98  | 13.64 | 1 |
| 2   | 14 | -7 | 166.42 | 17.27 | 1 |
| 1   | 14 | -7 | 81.41  | 14.23 | 2 |
| 1   | 14 | -7 | 53.13  | 10.26 | 1 |
| 0   | 14 | -7 | 15.48  | 7.78  | 2 |
| 0   | 14 | -7 | 16.20  | 6.47  | 1 |
| -1  | 14 | -7 | 52.51  | 11.55 | 2 |
| -1  | 14 | -7 | 45.78  | 9.50  | 1 |
| -2  | 14 | -7 | 33.26  | 9.48  | 2 |
| -2  | 14 | -7 | 29.02  | 7.03  | 1 |
| -3  | 14 | -7 | 286.68 | 19.62 | 1 |
| -3  | 14 | -7 | 285.56 | 21.93 | 2 |
| -4  | 14 | -7 | 10.27  | 7.27  | 2 |
| -4  | 14 | -7 | 9.54   | 4.94  | 1 |
| -5  | 14 | -7 | 0.39   | 4.80  | 2 |
| -5  | 14 | -7 | 6.32   | 4.82  | 1 |
| -6  | 14 | -7 | 170.32 | 19.52 | 2 |
| -7  | 14 | -7 | 40.48  | 11.53 | 2 |
| -8  | 14 | -7 | 52.71  | 13.01 | 2 |
| -9  | 14 | -7 | 40.23  | 12.34 | 2 |
| -10 | 14 | -7 | 133.75 | 20.89 | 2 |
| -11 | 14 | -7 | 46.91  | 12.78 | 2 |
| -12 | 14 | -7 | 0.62   | 7.24  | 2 |
| -13 | 14 | -7 | 75.66  | 17.08 | 2 |
| 9   | 13 | -7 | 39.97  | 12.00 | 1 |
| 8   | 13 | -7 | 14.39  | 8.86  | 1 |
| 7   | 13 | -7 | 22.71  | 9.32  | 1 |
| 6   | 13 | -7 | 33.93  | 10.26 | 1 |
| 5   | 13 | -7 | 38.09  | 9.96  | 1 |
| 4   | 13 | -7 | 5.70   | 6.19  | 1 |
| 3   | 13 | -7 | -5.29  | 4.29  | 1 |
| 2   | 13 | -7 | -4.46  | 3.37  | 1 |
| 1   | 13 | -7 | 23.87  | 6.70  | 1 |
| 1   | 13 | -7 | 27.17  | 8.22  | 2 |
| 0   | 13 | -7 | 11.60  | 4.96  | 1 |
| 0   | 13 | -7 | 12.83  | 6.67  | 2 |
| -1  | 13 | -7 | 4.00   | 5.79  | 2 |
| -1  | 13 | -7 | 13.99  | 5.40  | 1 |
| -2  | 13 | -7 | 44.20  | 10.05 | 2 |
| -2  | 13 | -7 | 38.88  | 8.06  | 1 |
| -3  | 13 | -7 | 203.32 | 15.70 | 1 |
| -3  | 13 | -7 | 229.28 | 18.64 | 2 |
| -4  | 13 | -7 | 156.65 | 17.42 | 2 |
| -4  | 13 | -7 | 175.95 | 14.11 | 1 |
| -5  | 13 | -7 | -1.94  | 3.25  | 1 |
| -5  | 13 | -7 | 1.51   | 5.57  | 2 |

|     |    |    |        |       |   |
|-----|----|----|--------|-------|---|
| -6  | 13 | -7 | 5.75   | 5.80  | 2 |
| -7  | 13 | -7 | 31.98  | 9.41  | 2 |
| -8  | 13 | -7 | 0.09   | 6.09  | 2 |
| -9  | 13 | -7 | 7.21   | 7.74  | 2 |
| -10 | 13 | -7 | 17.70  | 9.99  | 2 |
| -11 | 13 | -7 | 6.54   | 8.13  | 2 |
| -12 | 13 | -7 | 21.16  | 10.93 | 2 |
| -13 | 13 | -7 | 22.75  | 11.00 | 2 |
| 9   | 12 | -7 | 38.96  | 11.95 | 1 |
| 8   | 12 | -7 | 54.39  | 12.28 | 1 |
| 7   | 12 | -7 | 75.38  | 13.57 | 1 |
| 6   | 12 | -7 | 114.69 | 15.24 | 1 |
| 5   | 12 | -7 | 90.42  | 13.99 | 1 |
| 4   | 12 | -7 | 106.87 | 14.31 | 1 |
| 3   | 12 | -7 | 279.84 | 20.54 | 1 |
| 2   | 12 | -7 | 26.05  | 6.95  | 1 |
| 2   | 12 | -7 | 19.59  | 6.32  | 2 |
| 1   | 12 | -7 | 240.68 | 17.38 | 2 |
| 1   | 12 | -7 | 206.57 | 16.34 | 1 |
| 0   | 12 | -7 | 14.40  | 5.56  | 2 |
| 0   | 12 | -7 | 10.83  | 5.02  | 1 |
| -1  | 12 | -7 | 70.16  | 10.24 | 1 |
| -1  | 12 | -7 | 69.31  | 11.22 | 2 |
| -2  | 12 | -7 | 2.39   | 3.35  | 1 |
| -2  | 12 | -7 | 8.42   | 5.49  | 2 |
| -3  | 12 | -7 | -0.35  | 4.64  | 2 |
| -3  | 12 | -7 | 4.80   | 3.52  | 1 |
| -4  | 12 | -7 | 27.44  | 8.74  | 2 |
| -4  | 12 | -7 | 30.87  | 7.10  | 1 |
| -5  | 12 | -7 | 93.76  | 10.56 | 1 |
| -5  | 12 | -7 | 91.96  | 14.10 | 2 |
| -6  | 12 | -7 | 95.50  | 14.90 | 2 |
| -7  | 12 | -7 | 43.91  | 10.75 | 2 |
| -8  | 12 | -7 | 546.21 | 34.32 | 2 |
| -9  | 12 | -7 | 121.11 | 18.41 | 2 |
| -10 | 12 | -7 | 79.75  | 15.51 | 2 |
| -11 | 12 | -7 | 2.64   | 5.77  | 2 |
| -12 | 12 | -7 | 100.78 | 17.95 | 2 |
| -13 | 12 | -7 | 11.79  | 7.82  | 2 |
| -14 | 12 | -7 | 24.03  | 10.93 | 2 |
| 10  | 11 | -7 | 8.91   | 7.79  | 1 |
| 9   | 11 | -7 | 77.00  | 13.51 | 1 |
| 8   | 11 | -7 | 9.07   | 6.71  | 1 |
| 7   | 11 | -7 | 346.84 | 23.47 | 1 |
| 6   | 11 | -7 | 22.40  | 7.50  | 1 |
| 5   | 11 | -7 | 0.65   | 4.73  | 1 |

|     |    |    |        |       |   |
|-----|----|----|--------|-------|---|
| 4   | 11 | -7 | 19.25  | 6.96  | 1 |
| 3   | 11 | -7 | 154.61 | 15.74 | 1 |
| 2   | 11 | -7 | 52.50  | 9.29  | 2 |
| 2   | 11 | -7 | 57.84  | 10.11 | 1 |
| 1   | 11 | -7 | 10.60  | 4.50  | 1 |
| 1   | 11 | -7 | 9.45   | 4.81  | 2 |
| 0   | 11 | -7 | 118.81 | 12.66 | 1 |
| 0   | 11 | -7 | 130.09 | 13.44 | 2 |
| -1  | 11 | -7 | 377.29 | 21.62 | 2 |
| -1  | 11 | -7 | 351.88 | 20.87 | 1 |
| -2  | 11 | -7 | 482.84 | 24.30 | 1 |
| -2  | 11 | -7 | 420.42 | 23.82 | 2 |
| -3  | 11 | -7 | 48.90  | 8.44  | 1 |
| -3  | 11 | -7 | 49.93  | 9.51  | 2 |
| -4  | 11 | -7 | 37.91  | 7.22  | 1 |
| -4  | 11 | -7 | 30.46  | 8.24  | 2 |
| -5  | 11 | -7 | 188.09 | 13.42 | 1 |
| -5  | 11 | -7 | 181.74 | 18.16 | 2 |
| -6  | 11 | -7 | 29.95  | 8.79  | 2 |
| -7  | 11 | -7 | 74.59  | 13.77 | 2 |
| -8  | 11 | -7 | 4.63   | 5.98  | 2 |
| -9  | 11 | -7 | 30.89  | 10.32 | 2 |
| -10 | 11 | -7 | 7.44   | 6.48  | 2 |
| -11 | 11 | -7 | 8.60   | 6.49  | 2 |
| -12 | 11 | -7 | 36.42  | 11.19 | 2 |
| -13 | 11 | -7 | 68.63  | 16.22 | 2 |
| -14 | 11 | -7 | 76.87  | 17.55 | 2 |
| 10  | 10 | -7 | 7.87   | 7.16  | 1 |
| 9   | 10 | -7 | 84.77  | 13.32 | 1 |
| 8   | 10 | -7 | 17.64  | 8.19  | 1 |
| 7   | 10 | -7 | 88.54  | 13.19 | 1 |
| 6   | 10 | -7 | 108.81 | 13.88 | 1 |
| 5   | 10 | -7 | 19.04  | 6.71  | 1 |
| 4   | 10 | -7 | 132.90 | 14.14 | 1 |
| 3   | 10 | -7 | -5.21  | 2.76  | 1 |
| 2   | 10 | -7 | 14.54  | 5.38  | 2 |
| 2   | 10 | -7 | 11.64  | 4.77  | 1 |
| 1   | 10 | -7 | 91.95  | 10.65 | 2 |
| 1   | 10 | -7 | 73.54  | 9.93  | 1 |
| 0   | 10 | -7 | 0.88   | 3.12  | 1 |
| 0   | 10 | -7 | -1.24  | 3.30  | 2 |
| -1  | 10 | -7 | 28.73  | 6.97  | 2 |
| -1  | 10 | -7 | 26.53  | 5.91  | 1 |
| -2  | 10 | -7 | -2.63  | 2.93  | 1 |
| -2  | 10 | -7 | 4.37   | 3.65  | 2 |
| -3  | 10 | -7 | 2.31   | 3.05  | 1 |

-3 10 -7 5.87 3.67 2  
-4 10 -7 150.93 11.82 1  
-4 10 -7 108.38 13.80 2  
-5 10 -7 42.88 9.60 2  
-5 10 -7 85.72 9.30 1  
-6 10 -7 229.71 18.98 2  
-7 10 -7 5.19 5.34 2  
-8 10 -7 34.39 10.28 2  
-9 10 -7 71.63 13.60 2  
-10 10 -7 10.06 7.21 2  
-11 10 -7 17.81 8.77 2  
-12 10 -7 19.22 9.43 2  
-13 10 -7 14.14 9.47 2  
-14 10 -7 18.72 10.56 2  
-11 -9 7 103.18 15.37 3  
10 9 -7 3.60 6.58 1  
-10 -9 7 7.32 6.74 3  
-9 -9 7 25.16 8.20 3  
9 9 -7 20.72 8.34 1  
8 9 -7 63.74 11.42 1  
-8 -9 7 72.46 10.83 3  
7 9 -7 11.55 5.48 1  
6 9 -7 62.80 10.74 1  
5 9 -7 4.00 4.14 1  
4 9 -7 5.32 4.22 1  
3 9 -7 179.72 14.04 1  
2 9 -7 414.35 22.14 1  
1 9 -7 4.74 3.61 2  
1 9 -7 4.56 3.93 1  
0 9 -7 269.45 16.31 2  
0 9 -7 280.18 16.94 1  
-1 9 -7 474.91 22.98 1  
-1 9 -7 467.66 23.11 2  
-2 9 -7 177.97 13.66 2  
-2 9 -7 189.81 13.05 1  
-3 9 -7 462.31 24.68 2  
-3 9 -7 471.65 22.16 1  
-4 9 -7 194.93 15.43 2  
-4 9 -7 183.54 12.61 1  
-5 9 -7 137.64 10.53 1  
-5 9 -7 133.98 14.64 2  
-6 9 -7 66.85 12.24 2  
-7 9 -7 137.06 16.61 2  
-8 9 -7 13.94 7.40 2  
-9 9 -7 22.19 8.31 2  
-10 9 -7 394.72 28.12 2



-11 9 -7 134.78 19.15 2  
-12 9 -7 -5.33 4.38 2  
-13 9 -7 70.92 16.05 2  
-14 9 -7 53.29 14.84 2  
-14 -8 7 17.55 11.51 3  
-13 -8 7 28.44 11.25 3  
-12 -8 7 156.48 19.28 3  
-11 -8 7 39.30 10.45 3  
-10 -8 7 42.53 9.42 3  
10 8 -7 32.26 9.01 1  
-9 -8 7 107.74 13.48 3  
9 8 -7 120.02 13.93 1  
8 8 -7 545.46 28.22 1  
-8 -8 7 522.54 27.70 3  
-7 -8 7 64.50 9.74 3  
7 8 -7 68.89 10.69 1  
-6 -8 7 64.98 8.93 3  
6 8 -7 72.12 10.26 1  
5 8 -7 13.29 5.05 1  
-5 -8 7 6.96 4.14 3  
4 8 -7 75.19 10.34 1  
-4 -8 7 72.57 7.88 3  
3 8 -7 432.30 20.80 2  
3 8 -7 434.26 22.56 1  
-3 -8 7 438.67 18.71 3  
2 8 -7 54.42 8.48 1  
2 8 -7 48.67 7.02 2  
-2 -8 7 62.12 5.79 3  
1 8 -7 1581.89 55.17 1  
0 8 -7 10.88 4.47 1  
0 8 -7 5.53 3.09 2  
-1 8 -7 79.65 9.33 2  
-1 8 -7 69.16 8.42 1  
-2 8 -7 99.61 9.55 1  
-2 8 -7 100.16 10.79 2  
-3 8 -7 111.81 11.79 2  
-3 8 -7 87.58 8.78 1  
-4 8 -7 1662.29 55.44 1  
-4 8 -7 1706.77 62.27 2  
-5 8 -7 52.84 9.78 2  
-5 8 -7 69.15 7.42 1  
-6 8 -7 75.27 12.35 2  
-7 8 -7 -3.06 4.01 2  
-8 8 -7 18.14 7.19 2  
-9 8 -7 45.69 10.50 2  
-10 8 -7 355.23 26.11 2

-11 8 -7 98.61 16.12 2  
-12 8 -7 65.23 13.98 2  
-13 8 -7 46.47 12.81 2  
-14 8 -7 7.94 8.14 2  
-15 -7 7 -0.19 10.56 3  
-14 -7 7 174.94 22.43 3  
-13 -7 7 2.38 8.01 3  
-12 -7 7 183.66 20.27 3  
-11 -7 7 217.19 19.43 3  
10 7 -7 458.62 25.74 1  
-10 -7 7 449.47 27.48 3  
9 7 -7 16.77 6.66 1  
-9 -7 7 19.92 6.91 3  
8 7 -7 3.89 4.18 1  
-8 -7 7 8.68 5.20 3  
-7 -7 7 619.94 29.42 3  
7 7 -7 621.17 29.34 1  
-6 -7 7 6.60 4.58 3  
6 7 -7 3.57 3.92 1  
-5 -7 7 931.86 35.21 3  
5 7 -7 883.55 36.92 1  
-4 -7 7 174.60 11.59 3  
4 7 -7 188.51 13.97 1  
3 7 -7 14.83 3.94 2  
3 7 -7 10.32 4.84 1  
-3 -7 7 13.99 3.64 3  
2 7 -7 132.60 11.13 1  
-2 -7 7 122.27 8.25 3  
2 7 -7 151.42 10.11 2  
1 7 -7 541.00 22.84 2  
0 7 -7 228.44 13.45 2  
0 7 -7 210.36 13.65 1  
-1 7 -7 961.03 36.58 2  
-1 7 -7 936.05 35.50 1  
-2 7 -7 145.27 10.56 1  
-2 7 -7 182.18 12.50 2  
-3 7 -7 166.78 11.06 1  
-3 7 -7 171.09 13.39 2  
-4 7 -7 245.52 13.47 1  
-4 7 -7 238.34 16.92 2  
-5 7 -7 39.29 8.54 2  
-5 7 -7 26.92 4.90 1  
-6 7 -7 98.37 12.92 2  
-7 7 -7 18.63 6.70 2  
-8 7 -7 49.65 10.76 2  
-9 7 -7 2.50 5.68 2

-10 7 -7 125.46 17.12 2  
-11 7 -7 184.31 20.91 2  
-12 7 -7 -0.45 4.70 2  
-13 7 -7 7.30 6.54 2  
-14 7 -7 19.31 9.35 2  
-15 -6 7 -4.34 8.56 3  
-14 -6 7 70.06 14.83 3  
-13 -6 7 11.86 8.26 3  
-12 -6 7 25.84 9.04 3  
-11 -6 7 328.64 23.97 3  
-10 -6 7 166.15 16.82 3  
10 6 -7 122.31 12.93 1  
-9 -6 7 13.17 6.20 3  
9 6 -7 12.18 5.08 1  
8 6 -7 72.53 9.89 1  
-8 -6 7 33.21 8.01 3  
-7 -6 7 -3.84 3.75 3  
7 6 -7 2.56 3.71 1  
6 6 -7 79.15 9.95 1  
-6 -6 7 107.42 10.89 3  
5 6 -7 26.13 6.03 1  
-5 -6 7 22.50 5.52 3  
4 6 -7 96.68 10.35 1  
-4 -6 7 119.94 9.36 3  
-3 -6 7 329.90 15.52 3  
3 6 -7 318.04 14.84 2  
3 6 -7 287.72 17.16 1  
2 6 -7 716.06 26.66 2  
2 6 -7 716.82 29.39 1  
-2 -6 7 698.72 26.16 3  
1 6 -7 22.77 5.01 1  
1 6 -7 28.88 4.98 2  
0 6 -7 40.77 6.18 1  
-1 6 -7 1502.57 51.82 2  
-1 6 -7 1538.23 50.87 1  
-2 6 -7 777.73 29.61 1  
-2 6 -7 779.22 32.32 2  
-3 6 -7 1.32 2.87 2  
-3 6 -7 -2.69 1.62 1  
-4 6 -7 29.83 4.95 1  
-4 6 -7 17.76 5.64 2  
-5 6 -7 104.20 12.31 2  
-5 6 -7 97.87 7.69 1  
-6 6 -7 10.76 5.19 2  
-7 6 -7 102.81 13.34 2  
-8 6 -7 107.24 14.51 2

-9 6 -7 66.77 12.38 2  
-10 6 -7 14.51 5.84 2  
-11 6 -7 30.41 9.56 2  
-12 6 -7 3.00 5.49 2  
-13 6 -7 5.18 6.19 2  
-14 6 -7 232.38 26.16 2  
-16 -5 7 5.58 9.81 3  
-15 -5 7 8.06 9.46 3  
-14 -5 7 19.54 9.54 3  
-13 -5 7 14.96 7.80 3  
-12 -5 7 12.18 7.16 3  
-11 -5 7 3.53 5.61 3  
-10 -5 7 148.48 16.09 3  
9 5 -7 213.19 15.53 1  
-9 -5 7 245.10 18.21 3  
-8 -5 7 298.27 19.54 3  
8 5 -7 294.74 18.01 1  
-7 -5 7 662.38 30.22 3  
7 5 -7 636.70 28.89 1  
6 5 -7 40.60 7.46 1  
-6 -5 7 52.16 7.90 3  
-5 -5 7 166.02 11.61 3  
5 5 -7 133.43 11.36 1  
-4 -5 7 1138.26 41.01 3  
4 5 -7 1219.29 43.43 1  
3 5 -7 19.49 4.98 1  
3 5 -7 23.13 3.63 2  
-3 -5 7 12.10 3.58 3  
2 5 -7 54.95 5.01 2  
2 5 -7 39.30 6.45 1  
-2 -5 7 53.73 6.00 3  
1 5 -7 130.72 9.95 1  
1 5 -7 138.09 8.78 2  
0 5 -7 462.67 20.73 1  
-1 5 -7 3.57 3.00 2  
-1 5 -7 5.13 2.86 1  
-2 5 -7 5.08 3.13 2  
-2 5 -7 3.76 2.31 1  
-3 5 -7 169.73 12.89 2  
-3 5 -7 183.79 10.94 1  
-4 5 -7 52.88 8.92 2  
-4 5 -7 61.47 6.43 1  
-5 5 -7 280.80 18.99 2  
-5 5 -7 300.87 14.20 1  
-6 5 -7 292.69 20.06 2  
-7 5 -7 -1.61 3.68 2

-8 5 -7 301.89 22.11 2  
-9 5 -7 142.61 17.05 2  
-10 5 -7 174.47 19.62 2  
-11 5 -7 114.89 17.51 2  
-12 5 -7 120.45 18.35 2  
-13 5 -7 11.21 7.24 2  
-14 5 -7 51.09 13.26 2  
-16 -4 7 56.15 16.15 3  
-15 -4 7 -0.51 7.54 3  
-14 -4 7 99.93 16.93 3  
-13 -4 7 196.67 21.41 3  
-12 -4 7 34.59 9.80 3  
-11 -4 7 12.39 7.14 3  
10 4 -7 216.28 15.47 1  
-10 -4 7 292.53 20.52 3  
-9 -4 7 2.67 4.16 3  
9 4 -7 2.90 3.84 1  
8 4 -7 5.23 4.35 1  
-8 -4 7 2.40 4.54 3  
-7 -4 7 148.20 12.69 3  
7 4 -7 153.25 12.24 1  
-6 -4 7 1292.91 46.80 3  
6 4 -7 1259.39 46.22 1  
-5 -4 7 47.51 6.83 3  
5 4 -7 31.29 6.14 1  
4 4 -7 498.13 22.26 1  
-4 -4 7 438.89 20.37 3  
-3 -4 7 101.72 7.95 3  
3 4 -7 105.74 9.31 1  
3 4 -7 98.80 5.94 2  
2 4 -7 1070.52 37.71 1  
-2 -4 7 1037.86 36.54 3  
2 4 -7 991.95 33.40 2  
1 4 -7 583.86 24.56 1  
1 4 -7 602.22 22.37 2  
0 4 -7 1794.94 58.15 1  
-1 4 -7 382.62 18.46 2  
-1 4 -7 385.93 18.03 1  
-2 4 -7 345.87 18.38 2  
-2 4 -7 338.65 16.30 1  
-3 4 -7 450.97 19.48 1  
-3 4 -7 469.69 22.87 2  
-4 4 -7 417.97 18.05 1  
-4 4 -7 442.75 22.79 2  
-5 4 -7 366.91 15.83 1  
-5 4 -7 324.62 20.21 2

|     |    |    |         |       |   |
|-----|----|----|---------|-------|---|
| -6  | 4  | -7 | 342.13  | 21.13 | 2 |
| -7  | 4  | -7 | 304.62  | 20.76 | 2 |
| -8  | 4  | -7 | 13.18   | 5.85  | 2 |
| -9  | 4  | -7 | 41.99   | 9.99  | 2 |
| -10 | 4  | -7 | 116.98  | 16.24 | 2 |
| -11 | 4  | -7 | 22.70   | 7.78  | 2 |
| -12 | 4  | -7 | 541.27  | 34.42 | 2 |
| -13 | 4  | -7 | -3.66   | 4.43  | 2 |
| -14 | 4  | -7 | -3.61   | 7.38  | 2 |
| -16 | -3 | 7  | 2.27    | 8.61  | 3 |
| -15 | -3 | 7  | 52.67   | 13.88 | 3 |
| -14 | -3 | 7  | 1.31    | 6.33  | 3 |
| -13 | -3 | 7  | 74.64   | 14.63 | 3 |
| -12 | -3 | 7  | 221.64  | 19.90 | 3 |
| -11 | -3 | 7  | 10.35   | 6.23  | 3 |
| -10 | -3 | 7  | 421.04  | 26.28 | 3 |
| 10  | 3  | -7 | 476.70  | 23.24 | 1 |
| -9  | -3 | 7  | 318.18  | 20.74 | 3 |
| 8   | 3  | -7 | 12.90   | 4.98  | 1 |
| -8  | -3 | 7  | 20.61   | 6.35  | 3 |
| -7  | -3 | 7  | 239.96  | 16.06 | 3 |
| 7   | 3  | -7 | 257.69  | 15.79 | 1 |
| -6  | -3 | 7  | 596.30  | 27.40 | 3 |
| 6   | 3  | -7 | 665.09  | 27.67 | 1 |
| -5  | -3 | 7  | 118.92  | 9.66  | 3 |
| 5   | 3  | -7 | 108.69  | 9.48  | 1 |
| 4   | 3  | -7 | 116.38  | 9.77  | 1 |
| -4  | -3 | 7  | 125.48  | 9.56  | 3 |
| -3  | -3 | 7  | 535.98  | 22.74 | 3 |
| 3   | 3  | -7 | 536.83  | 23.20 | 1 |
| 3   | 3  | -7 | 541.57  | 17.95 | 2 |
| -2  | -3 | 7  | 415.03  | 18.96 | 3 |
| 2   | 3  | -7 | 388.67  | 14.90 | 2 |
| 2   | 3  | -7 | 398.12  | 18.79 | 1 |
| 1   | 3  | -7 | 438.53  | 17.62 | 2 |
| 1   | 3  | -7 | 435.77  | 19.66 | 1 |
| 0   | 3  | -7 | 1305.16 | 43.98 | 2 |
| -1  | 3  | -7 | 978.34  | 35.06 | 1 |
| -1  | 3  | -7 | 1027.93 | 36.73 | 2 |
| -2  | 3  | -7 | 1586.10 | 53.17 | 2 |
| -2  | 3  | -7 | 1485.67 | 49.38 | 1 |
| -3  | 3  | -7 | 895.91  | 30.98 | 1 |
| -3  | 3  | -7 | 829.67  | 34.58 | 2 |
| -4  | 3  | -7 | 29.50   | 6.92  | 2 |
| -4  | 3  | -7 | 30.52   | 4.58  | 1 |
| -5  | 3  | -7 | 62.34   | 6.18  | 1 |

-5 3 -7 42.73 8.38 2  
-6 3 -7 342.91 21.36 2  
-7 3 -7 145.64 15.64 2  
-8 3 -7 180.56 18.28 2  
-9 3 -7 39.28 9.54 2  
-10 3 -7 145.14 18.05 2  
-11 3 -7 61.80 12.76 2  
-12 3 -7 5.08 6.43 2  
-13 3 -7 125.11 19.91 2  
-14 3 -7 3.56 8.04 2  
-17 -2 7 18.20 11.13 3  
-16 -2 7 35.20 11.83 3  
-15 -2 7 47.44 12.61 3  
-14 -2 7 20.90 9.54 3  
-13 -2 7 6.42 7.20 3  
-12 -2 7 19.38 8.32 3  
-11 -2 7 4.00 5.58 3  
-10 -2 7 27.49 7.84 3  
10 2 -7 34.24 7.04 1  
-9 -2 7 91.34 12.04 3  
8 2 -7 515.08 24.14 1  
-8 -2 7 532.81 26.64 3  
-7 -2 7 128.35 11.75 3  
7 2 -7 145.21 11.22 1  
-6 -2 7 3.89 3.31 3  
6 2 -7 6.40 3.10 1  
5 2 -7 65.56 7.76 1  
-5 -2 7 62.20 7.79 3  
-4 -2 7 44.62 6.48 3  
4 2 -7 43.51 6.32 1  
3 2 -7 27.57 2.49 2  
-3 -2 7 31.36 5.58 3  
3 2 -7 28.00 5.26 1  
2 2 -7 24.86 5.04 1  
2 2 -7 33.44 3.66 2  
-2 -2 7 37.87 6.15 3  
1 2 -7 511.32 19.73 2  
1 2 -7 520.54 21.89 1  
0 2 -7 197.84 11.67 1  
-1 2 -7 9.56 3.45 1  
-1 2 -7 11.50 3.88 2  
-2 2 -7 76.32 8.39 2  
-2 2 -7 71.85 7.08 1  
-3 2 -7 7.99 3.06 1  
-3 2 -7 10.34 4.16 2  
-4 2 -7 587.68 27.75 2

|     |    |    |        |       |   |
|-----|----|----|--------|-------|---|
| -4  | 2  | -7 | 617.85 | 23.39 | 1 |
| -5  | 2  | -7 | 243.56 | 12.29 | 1 |
| -5  | 2  | -7 | 228.12 | 16.35 | 2 |
| -6  | 2  | -7 | 43.14  | 8.81  | 2 |
| -7  | 2  | -7 | 52.66  | 10.39 | 2 |
| -8  | 2  | -7 | -2.70  | 4.09  | 2 |
| -9  | 2  | -7 | 80.47  | 13.63 | 2 |
| -10 | 2  | -7 | 64.39  | 13.61 | 2 |
| -11 | 2  | -7 | 14.28  | 8.19  | 2 |
| -12 | 2  | -7 | 4.35   | 5.55  | 2 |
| -13 | 2  | -7 | 26.15  | 9.64  | 2 |
| -14 | 2  | -7 | -2.59  | 6.79  | 2 |
| -17 | -1 | 7  | 39.67  | 13.76 | 3 |
| -16 | -1 | 7  | 48.28  | 14.38 | 3 |
| -15 | -1 | 7  | 8.26   | 8.61  | 3 |
| -14 | -1 | 7  | 7.39   | 6.75  | 3 |
| -13 | -1 | 7  | -2.36  | 4.78  | 3 |
| -12 | -1 | 7  | 3.28   | 5.70  | 3 |
| -11 | -1 | 7  | 1.38   | 5.46  | 3 |
| -10 | -1 | 7  | 15.49  | 6.67  | 3 |
| 10  | 1  | -7 | 8.11   | 4.06  | 1 |
| -9  | -1 | 7  | 3.77   | 3.94  | 3 |
| 9   | 1  | -7 | -1.11  | 2.57  | 1 |
| -8  | -1 | 7  | 234.81 | 16.65 | 3 |
| 8   | 1  | -7 | 244.63 | 15.12 | 1 |
| 7   | 1  | -7 | 292.24 | 16.35 | 1 |
| -7  | -1 | 7  | 275.06 | 17.24 | 3 |
| 6   | 1  | -7 | 101.63 | 9.48  | 1 |
| -6  | -1 | 7  | 108.98 | 9.79  | 3 |
| -5  | -1 | 7  | 159.28 | 11.40 | 3 |
| 5   | 1  | -7 | 141.42 | 10.97 | 1 |
| -4  | -1 | 7  | 258.68 | 14.57 | 3 |
| 4   | 1  | -7 | 248.26 | 14.20 | 1 |
| 3   | 1  | -7 | 7.75   | 3.19  | 1 |
| -3  | -1 | 7  | 6.26   | 3.38  | 3 |
| 3   | 1  | -7 | 12.75  | 2.05  | 2 |
| 2   | 1  | -7 | 91.49  | 5.95  | 2 |
| 2   | 1  | -7 | 86.66  | 7.76  | 1 |
| 1   | 1  | -7 | 476.46 | 20.25 | 1 |
| 1   | 1  | -7 | 446.94 | 18.01 | 2 |
| 0   | 1  | -7 | 24.43  | 4.57  | 1 |
| -1  | 1  | -7 | 489.39 | 21.11 | 2 |
| -1  | 1  | -7 | 457.64 | 19.83 | 1 |
| -2  | 1  | -7 | 747.71 | 28.62 | 1 |
| -2  | 1  | -7 | 840.15 | 32.00 | 2 |
| -3  | 1  | -7 | 147.59 | 9.69  | 1 |



|     |   |    |         |       |   |
|-----|---|----|---------|-------|---|
| -3  | 1 | -7 | 155.65  | 11.84 | 2 |
| -4  | 1 | -7 | 128.15  | 11.34 | 2 |
| -4  | 1 | -7 | 144.81  | 9.48  | 1 |
| -5  | 1 | -7 | 68.74   | 6.67  | 1 |
| -5  | 1 | -7 | 61.07   | 10.05 | 2 |
| -6  | 1 | -7 | 14.68   | 5.68  | 2 |
| -7  | 1 | -7 | -3.14   | 3.36  | 2 |
| -8  | 1 | -7 | 60.38   | 11.67 | 2 |
| -9  | 1 | -7 | 39.40   | 9.89  | 2 |
| -10 | 1 | -7 | 93.24   | 15.98 | 2 |
| -11 | 1 | -7 | 120.05  | 18.98 | 2 |
| -12 | 1 | -7 | 13.40   | 8.41  | 2 |
| -13 | 1 | -7 | 19.88   | 10.17 | 2 |
| -17 | 0 | 7  | 72.69   | 17.85 | 3 |
| -16 | 0 | 7  | 41.80   | 12.41 | 3 |
| -15 | 0 | 7  | 1.42    | 6.68  | 3 |
| -14 | 0 | 7  | 117.14  | 18.01 | 3 |
| -13 | 0 | 7  | 148.34  | 18.48 | 3 |
| -12 | 0 | 7  | 235.48  | 20.38 | 3 |
| -11 | 0 | 7  | 4.91    | 5.43  | 3 |
| -10 | 0 | 7  | 139.80  | 14.96 | 3 |
| 10  | 0 | -7 | 157.31  | 12.05 | 1 |
| -9  | 0 | 7  | 269.71  | 18.49 | 3 |
| -8  | 0 | 7  | 226.27  | 15.77 | 3 |
| 8   | 0 | -7 | 194.40  | 13.08 | 1 |
| 7   | 0 | -7 | 1368.98 | 46.94 | 1 |
| -7  | 0 | 7  | 1273.45 | 48.84 | 3 |
| -6  | 0 | 7  | 45.69   | 7.31  | 3 |
| 6   | 0 | -7 | 44.72   | 6.82  | 1 |
| -5  | 0 | 7  | 1663.98 | 57.53 | 3 |
| 5   | 0 | -7 | 1705.00 | 56.16 | 1 |
| -4  | 0 | 7  | 3.56    | 3.12  | 3 |
| 4   | 0 | -7 | 0.87    | 2.47  | 1 |
| 3   | 0 | -7 | 1.20    | 2.30  | 1 |
| 3   | 0 | -7 | 3.44    | 1.56  | 2 |
| -3  | 0 | 7  | 6.57    | 3.68  | 3 |
| 2   | 0 | -7 | 219.82  | 12.85 | 1 |
| 2   | 0 | -7 | 214.93  | 10.23 | 2 |
| 1   | 0 | -7 | 54.77   | 6.72  | 1 |
| 1   | 0 | -7 | 60.68   | 6.02  | 2 |
| 0   | 0 | -7 | 301.62  | 15.77 | 2 |
| 0   | 0 | -7 | 403.58  | 17.45 | 1 |
| -1  | 0 | -7 | 528.03  | 22.89 | 2 |
| -1  | 0 | -7 | 491.76  | 21.33 | 1 |
| -2  | 0 | -7 | 221.76  | 14.22 | 2 |
| -2  | 0 | -7 | 242.61  | 12.99 | 1 |

|     |    |    |         |       |   |
|-----|----|----|---------|-------|---|
| -3  | 0  | -7 | 7.06    | 3.97  | 2 |
| -3  | 0  | -7 | 7.10    | 2.87  | 1 |
| -4  | 0  | -7 | 122.51  | 12.81 | 2 |
| -4  | 0  | -7 | 147.22  | 9.82  | 1 |
| -5  | 0  | -7 | -0.66   | 2.61  | 1 |
| -5  | 0  | -7 | -1.66   | 3.33  | 2 |
| -6  | 0  | -7 | 0.85    | 3.68  | 2 |
| -7  | 0  | -7 | 34.09   | 8.92  | 2 |
| -8  | 0  | -7 | 0.75    | 3.93  | 2 |
| -9  | 0  | -7 | 42.80   | 10.19 | 2 |
| -10 | 0  | -7 | 37.63   | 10.74 | 2 |
| -11 | 0  | -7 | 75.34   | 14.77 | 2 |
| -12 | 0  | -7 | 101.06  | 18.56 | 2 |
| -13 | 0  | -7 | 3.59    | 8.54  | 2 |
| -17 | 1  | 7  | 0.09    | 8.84  | 3 |
| -16 | 1  | 7  | 6.70    | 8.55  | 3 |
| -15 | 1  | 7  | 43.20   | 12.60 | 3 |
| -14 | 1  | 7  | 11.83   | 7.98  | 3 |
| -13 | 1  | 7  | 366.52  | 26.50 | 3 |
| -12 | 1  | 7  | 81.18   | 13.54 | 3 |
| -11 | 1  | 7  | 18.51   | 7.43  | 3 |
| 10  | -1 | -7 | -1.23   | 2.91  | 1 |
| -10 | 1  | 7  | -0.08   | 3.77  | 3 |
| 9   | -1 | -7 | 1.15    | 2.86  | 1 |
| -9  | 1  | 7  | 10.38   | 4.85  | 3 |
| 8   | -1 | -7 | 144.74  | 11.08 | 1 |
| -8  | 1  | 7  | 136.06  | 12.40 | 3 |
| 7   | -1 | -7 | 15.52   | 4.21  | 1 |
| -7  | 1  | 7  | 3.77    | 3.40  | 3 |
| 6   | -1 | -7 | 39.62   | 6.54  | 1 |
| -6  | 1  | 7  | 40.08   | 7.44  | 3 |
| 5   | -1 | -7 | 978.43  | 36.25 | 1 |
| -5  | 1  | 7  | 975.82  | 37.85 | 3 |
| 4   | -1 | -7 | 1177.45 | 41.94 | 1 |
| -4  | 1  | 7  | 1196.48 | 43.94 | 3 |
| 3   | -1 | -7 | 376.76  | 18.44 | 1 |
| -3  | 1  | 7  | 395.60  | 20.33 | 3 |
| 2   | -1 | -7 | -0.87   | 1.51  | 1 |
| 2   | -1 | -7 | 1.76    | 1.82  | 2 |
| 1   | -1 | -7 | 33.81   | 5.05  | 2 |
| 1   | -1 | -7 | 53.86   | 6.57  | 1 |
| 0   | -1 | -7 | 1000.89 | 36.77 | 2 |
| 0   | -1 | -7 | 1012.10 | 36.56 | 1 |
| -1  | -1 | -7 | 599.32  | 24.04 | 1 |
| -1  | -1 | -7 | 534.70  | 24.92 | 2 |
| -2  | -1 | -7 | -0.29   | 2.01  | 1 |

|     |    |    |        |       |   |
|-----|----|----|--------|-------|---|
| -2  | -1 | -7 | 0.57   | 2.75  | 2 |
| -3  | -1 | -7 | 71.91  | 10.13 | 2 |
| -3  | -1 | -7 | 76.47  | 7.71  | 1 |
| -4  | -1 | -7 | 6.37   | 3.20  | 1 |
| -4  | -1 | -7 | 7.67   | 4.48  | 2 |
| -5  | -1 | -7 | 293.93 | 15.60 | 1 |
| -5  | -1 | -7 | 307.25 | 20.46 | 2 |
| -6  | -1 | -7 | 26.61  | 7.68  | 2 |
| -7  | -1 | -7 | 0.76   | 4.51  | 2 |
| -8  | -1 | -7 | 87.11  | 14.53 | 2 |
| -9  | -1 | -7 | 143.39 | 18.68 | 2 |
| -10 | -1 | -7 | 25.00  | 8.93  | 2 |
| -11 | -1 | -7 | 54.12  | 13.01 | 2 |
| -12 | -1 | -7 | 21.63  | 10.13 | 2 |
| -13 | -1 | -7 | 62.20  | 15.85 | 2 |
| -17 | 2  | 7  | 5.89   | 6.48  | 3 |
| -16 | 2  | 7  | -3.87  | 6.59  | 3 |
| -15 | 2  | 7  | 222.42 | 23.70 | 3 |
| -14 | 2  | 7  | 110.03 | 17.09 | 3 |
| -13 | 2  | 7  | -5.37  | 4.33  | 3 |
| -12 | 2  | 7  | 240.06 | 20.02 | 3 |
| -11 | 2  | 7  | 460.04 | 27.99 | 3 |
| 10  | -2 | -7 | 87.16  | 9.52  | 1 |
| -10 | 2  | 7  | 77.05  | 11.83 | 3 |
| -8  | 2  | 7  | 10.14  | 4.84  | 3 |
| 8   | -2 | -7 | 17.64  | 4.74  | 1 |
| 7   | -2 | -7 | 340.01 | 17.93 | 1 |
| -7  | 2  | 7  | 337.27 | 13.74 | 2 |
| -7  | 2  | 7  | 351.92 | 19.97 | 3 |
| 6   | -2 | -7 | 127.91 | 10.52 | 1 |
| -6  | 2  | 7  | 131.97 | 11.44 | 3 |
| 5   | -2 | -7 | 7.03   | 3.65  | 1 |
| -5  | 2  | 7  | 4.86   | 3.88  | 3 |
| -4  | 2  | 7  | 16.41  | 5.85  | 3 |
| 4   | -2 | -7 | 24.01  | 5.27  | 1 |
| 3   | -2 | -7 | 598.23 | 25.70 | 1 |
| 2   | -2 | -7 | 67.24  | 7.91  | 1 |
| 1   | -2 | -7 | 155.26 | 11.04 | 1 |
| 0   | -2 | -7 | 179.60 | 12.36 | 2 |
| 0   | -2 | -7 | 190.80 | 12.48 | 1 |
| -1  | -2 | -7 | 89.57  | 9.21  | 1 |
| -1  | -2 | -7 | 101.33 | 10.40 | 2 |
| -2  | -2 | -7 | 0.73   | 2.73  | 1 |
| -2  | -2 | -7 | 2.54   | 3.45  | 2 |
| -3  | -2 | -7 | 4.50   | 4.37  | 2 |
| -3  | -2 | -7 | 0.89   | 2.92  | 1 |

|     |    |    |        |       |   |
|-----|----|----|--------|-------|---|
| -4  | -2 | -7 | 1.14   | 2.85  | 1 |
| -4  | -2 | -7 | 2.64   | 3.56  | 2 |
| -5  | -2 | -7 | 42.54  | 6.85  | 1 |
| -5  | -2 | -7 | 29.63  | 8.29  | 2 |
| -6  | -2 | -7 | 29.23  | 8.60  | 2 |
| -7  | -2 | -7 | 36.65  | 10.40 | 2 |
| -8  | -2 | -7 | 27.63  | 8.46  | 2 |
| -9  | -2 | -7 | 63.23  | 13.27 | 2 |
| -10 | -2 | -7 | 17.44  | 7.94  | 2 |
| -11 | -2 | -7 | -3.03  | 6.51  | 2 |
| -12 | -2 | -7 | 8.08   | 8.32  | 2 |
| -17 | 3  | 7  | -2.30  | 7.05  | 3 |
| -16 | 3  | 7  | 111.69 | 19.06 | 3 |
| -15 | 3  | 7  | 233.40 | 24.05 | 3 |
| -14 | 3  | 7  | 80.20  | 15.27 | 3 |
| -13 | 3  | 7  | 107.49 | 16.26 | 3 |
| -12 | 3  | 7  | 213.54 | 19.24 | 3 |
| -11 | 3  | 7  | 3.63   | 5.52  | 3 |
| -10 | 3  | 7  | 359.59 | 23.06 | 3 |
| 10  | -3 | -7 | 372.60 | 19.61 | 1 |
| -9  | 3  | 7  | 672.22 | 32.17 | 3 |
| -8  | 3  | 7  | 903.30 | 38.97 | 3 |
| 8   | -3 | -7 | 957.19 | 36.31 | 1 |
| -7  | 3  | 7  | 54.46  | 5.86  | 2 |
| 7   | -3 | -7 | 49.34  | 7.62  | 1 |
| -7  | 3  | 7  | 43.59  | 8.47  | 3 |
| 6   | -3 | -7 | 19.39  | 5.25  | 1 |
| -6  | 3  | 7  | 15.69  | 5.08  | 3 |
| -5  | 3  | 7  | 506.84 | 25.21 | 3 |
| 5   | -3 | -7 | 523.36 | 24.06 | 1 |
| 4   | -3 | -7 | 65.51  | 8.36  | 1 |
| -4  | 3  | 7  | 70.75  | 9.92  | 3 |
| 3   | -3 | -7 | 91.27  | 9.67  | 1 |
| 2   | -3 | -7 | 13.05  | 4.39  | 1 |
| 1   | -3 | -7 | 178.38 | 12.61 | 1 |
| 0   | -3 | -7 | 24.40  | 5.44  | 1 |
| -1  | -3 | -7 | 32.98  | 7.45  | 2 |
| -1  | -3 | -7 | 26.57  | 5.98  | 1 |
| -2  | -3 | -7 | 267.81 | 16.09 | 1 |
| -2  | -3 | -7 | 288.93 | 18.48 | 2 |
| -3  | -3 | -7 | 9.77   | 4.46  | 1 |
| -3  | -3 | -7 | 4.92   | 4.30  | 2 |
| -4  | -3 | -7 | 530.10 | 24.39 | 1 |
| -4  | -3 | -7 | 511.44 | 28.87 | 2 |
| -5  | -3 | -7 | 151.35 | 12.16 | 1 |
| -5  | -3 | -7 | 144.89 | 16.98 | 2 |

-6 -3 -7 20.82 7.70 2  
-7 -3 -7 311.65 24.42 2  
-8 -3 -7 21.40 7.97 2  
-9 -3 -7 230.32 24.87 2  
-10 -3 -7 43.63 12.69 2  
-11 -3 -7 1.79 6.31 2  
-12 -3 -7 6.27 8.35 2  
-17 4 7 -3.69 7.62 3  
-16 4 7 4.21 8.57 3  
-15 4 7 86.51 17.12 3  
-14 4 7 1043.70 51.02 3  
-13 4 7 50.57 12.01 3  
-12 4 7 453.40 28.33 3  
-11 4 7 -5.13 4.16 3  
-10 4 7 183.24 16.12 3  
10 -4 -7 214.35 14.48 1  
9 -4 -7 220.27 15.04 1  
-9 4 7 275.01 18.37 3  
8 -4 -7 408.42 21.21 1  
-8 4 7 423.90 23.82 3  
-7 4 7 424.59 18.62 2  
7 -4 -7 429.39 21.14 1  
-7 4 7 390.08 22.51 3  
6 -4 -7 167.16 12.94 1  
-6 4 7 176.51 14.23 3  
-5 4 7 1326.75 50.08 3  
5 -4 -7 1300.66 47.43 1  
4 -4 -7 53.27 8.22 1  
3 -4 -7 331.17 18.55 1  
2 -4 -7 637.52 28.09 1  
1 -4 -7 1301.68 47.25 1  
0 -4 -7 5.88 4.04 1  
-1 -4 -7 232.89 15.23 1  
-2 -4 -7 2.41 3.73 1  
-2 -4 -7 3.29 4.00 2  
-3 -4 -7 35.31 8.52 2  
-3 -4 -7 37.74 7.55 1  
-4 -4 -7 217.51 15.36 1  
-4 -4 -7 229.53 18.81 2  
-5 -4 -7 14.28 7.35 2  
-5 -4 -7 14.55 5.80 1  
-6 -4 -7 66.81 13.57 2  
-7 -4 -7 36.28 10.53 2  
-8 -4 -7 63.07 13.89 2  
-9 -4 -7 2.82 5.74 2  
-10 -4 -7 69.26 14.71 2

|     |    |    |        |       |   |
|-----|----|----|--------|-------|---|
| -11 | -4 | -7 | 48.29  | 13.34 | 2 |
| -18 | 5  | 7  | 3.35   | 7.71  | 3 |
| -17 | 5  | 7  | -2.04  | 6.58  | 3 |
| -15 | 5  | 7  | 3.18   | 7.82  | 3 |
| -14 | 5  | 7  | 99.27  | 16.24 | 3 |
| -13 | 5  | 7  | 7.04   | 6.78  | 3 |
| -12 | 5  | 7  | 221.61 | 19.26 | 3 |
| -11 | 5  | 7  | 345.44 | 23.33 | 3 |
| -10 | 5  | 7  | 322.15 | 20.82 | 3 |
| 10  | -5 | -7 | 213.46 | 15.32 | 1 |
| -9  | 5  | 7  | -0.81  | 4.15  | 3 |
| 9   | -5 | -7 | 0.34   | 3.42  | 1 |
| -8  | 5  | 7  | 19.79  | 6.58  | 3 |
| -8  | 5  | 7  | 40.00  | 6.48  | 2 |
| 8   | -5 | -7 | 31.26  | 6.89  | 1 |
| 7   | -5 | -7 | 769.10 | 32.50 | 1 |
| -7  | 5  | 7  | 799.66 | 30.10 | 2 |
| -7  | 5  | 7  | 693.45 | 33.63 | 3 |
| 6   | -5 | -7 | 73.15  | 9.67  | 1 |
| -6  | 5  | 7  | 39.45  | 8.54  | 3 |
| -5  | 5  | 7  | 380.14 | 22.79 | 3 |
| 5   | -5 | -7 | 411.24 | 21.59 | 1 |
| 4   | -5 | -7 | 84.74  | 10.31 | 1 |
| 3   | -5 | -7 | 1.30   | 3.64  | 1 |
| 2   | -5 | -7 | 309.21 | 18.31 | 1 |
| 1   | -5 | -7 | 3.03   | 4.04  | 1 |
| 0   | -5 | -7 | 230.82 | 15.70 | 1 |
| -1  | -5 | -7 | 1.75   | 4.40  | 1 |
| -2  | -5 | -7 | 686.23 | 30.46 | 1 |
| -3  | -5 | -7 | 179.12 | 14.28 | 1 |
| -3  | -5 | -7 | 176.59 | 18.04 | 2 |
| -4  | -5 | -7 | 21.74  | 7.87  | 2 |
| -4  | -5 | -7 | 13.29  | 5.52  | 1 |
| -5  | -5 | -7 | 130.00 | 17.56 | 2 |
| -5  | -5 | -7 | 143.54 | 13.49 | 1 |
| -6  | -5 | -7 | 17.01  | 8.87  | 2 |
| -7  | -5 | -7 | 85.65  | 16.02 | 2 |
| -8  | -5 | -7 | 38.99  | 12.01 | 2 |
| -9  | -5 | -7 | 15.73  | 7.79  | 2 |
| -10 | -5 | -7 | 0.85   | 7.29  | 2 |
| -11 | -5 | -7 | 5.39   | 8.45  | 2 |
| -17 | 6  | 7  | 13.92  | 9.64  | 3 |
| -16 | 6  | 7  | 118.83 | 19.45 | 3 |
| -15 | 6  | 7  | 2.89   | 6.81  | 3 |
| -14 | 6  | 7  | -4.10  | 6.47  | 3 |
| -13 | 6  | 7  | 16.86  | 8.39  | 3 |

|     |    |    |        |       |   |
|-----|----|----|--------|-------|---|
| -12 | 6  | 7  | 10.65  | 6.87  | 3 |
| -11 | 6  | 7  | 55.02  | 11.18 | 3 |
| -10 | 6  | 7  | 56.64  | 10.73 | 3 |
| -9  | 6  | 7  | 23.48  | 7.51  | 3 |
| 9   | -6 | -7 | 36.58  | 7.82  | 1 |
| 8   | -6 | -7 | 73.17  | 10.03 | 1 |
| -8  | 6  | 7  | 74.92  | 9.20  | 2 |
| -8  | 6  | 7  | 86.16  | 11.68 | 3 |
| 7   | -6 | -7 | 253.50 | 17.29 | 1 |
| -7  | 6  | 7  | 272.78 | 16.03 | 2 |
| -7  | 6  | 7  | 222.94 | 17.64 | 3 |
| -6  | 6  | 7  | 23.12  | 7.31  | 3 |
| 6   | -6 | -7 | 34.58  | 7.77  | 1 |
| 5   | -6 | -7 | 103.06 | 11.66 | 1 |
| 4   | -6 | -7 | 362.33 | 20.79 | 1 |
| 3   | -6 | -7 | 0.24   | 3.69  | 1 |
| 2   | -6 | -7 | 20.31  | 6.11  | 1 |
| 1   | -6 | -7 | 86.22  | 10.88 | 1 |
| 0   | -6 | -7 | 80.61  | 10.77 | 1 |
| -1  | -6 | -7 | 319.55 | 19.72 | 1 |
| -2  | -6 | -7 | 138.94 | 13.78 | 1 |
| -3  | -6 | -7 | 263.99 | 17.80 | 1 |
| -4  | -6 | -7 | 30.61  | 7.27  | 1 |
| -4  | -6 | -7 | 20.47  | 8.42  | 2 |
| -5  | -6 | -7 | 12.72  | 7.53  | 2 |
| -5  | -6 | -7 | 37.75  | 8.19  | 1 |
| -6  | -6 | -7 | -2.77  | 5.89  | 2 |
| -7  | -6 | -7 | 1.94   | 5.79  | 2 |
| -8  | -6 | -7 | 311.41 | 26.40 | 2 |
| -9  | -6 | -7 | 141.89 | 22.49 | 2 |
| -10 | -6 | -7 | 1.46   | 8.14  | 2 |
| -17 | 7  | 7  | -3.57  | 7.46  | 3 |
| -16 | 7  | 7  | -1.58  | 7.34  | 3 |
| -15 | 7  | 7  | 36.90  | 11.84 | 3 |
| -14 | 7  | 7  | 17.38  | 9.06  | 3 |
| -13 | 7  | 7  | 151.52 | 17.88 | 3 |
| -12 | 7  | 7  | 112.85 | 15.42 | 3 |
| 11  | -7 | -7 | 5.12   | 4.94  | 1 |
| -11 | 7  | 7  | -3.42  | 5.55  | 3 |
| -10 | 7  | 7  | 174.30 | 17.11 | 3 |
| 10  | -7 | -7 | 152.08 | 13.78 | 1 |
| -9  | 7  | 7  | 14.97  | 6.22  | 3 |
| 9   | -7 | -7 | 18.75  | 5.94  | 1 |
| -8  | 7  | 7  | 274.44 | 19.56 | 3 |
| 8   | -7 | -7 | 270.33 | 18.15 | 1 |
| -8  | 7  | 7  | 262.34 | 16.86 | 2 |

|     |    |    |        |       |   |
|-----|----|----|--------|-------|---|
| -7  | 7  | 7  | 381.13 | 23.47 | 3 |
| -7  | 7  | 7  | 353.80 | 20.13 | 2 |
| 7   | -7 | -7 | 394.63 | 22.09 | 1 |
| -6  | 7  | 7  | 47.85  | 10.09 | 3 |
| 6   | -7 | -7 | 55.55  | 9.54  | 1 |
| 5   | -7 | -7 | 118.91 | 12.67 | 1 |
| 4   | -7 | -7 | 1.49   | 3.67  | 1 |
| 3   | -7 | -7 | 289.86 | 18.60 | 1 |
| 2   | -7 | -7 | 2.93   | 3.91  | 1 |
| 1   | -7 | -7 | 785.13 | 35.00 | 1 |
| 0   | -7 | -7 | 910.45 | 38.74 | 1 |
| -1  | -7 | -7 | 20.29  | 6.24  | 1 |
| -2  | -7 | -7 | 129.56 | 13.81 | 1 |
| -3  | -7 | -7 | 93.45  | 12.28 | 1 |
| -4  | -7 | -7 | 193.22 | 21.19 | 2 |
| -4  | -7 | -7 | 202.10 | 16.11 | 1 |
| -5  | -7 | -7 | 67.76  | 14.14 | 2 |
| -6  | -7 | -7 | 35.47  | 11.66 | 2 |
| -7  | -7 | -7 | 16.91  | 7.16  | 2 |
| -8  | -7 | -7 | 107.42 | 19.04 | 2 |
| -9  | -7 | -7 | 3.62   | 8.51  | 2 |
| -10 | -7 | -7 | 23.53  | 11.32 | 2 |
| -17 | 8  | 7  | 17.58  | 10.21 | 3 |
| -16 | 8  | 7  | 16.42  | 10.21 | 3 |
| -15 | 8  | 7  | 18.66  | 9.96  | 3 |
| -14 | 8  | 7  | 2.56   | 7.60  | 3 |
| -13 | 8  | 7  | 61.96  | 12.92 | 3 |
| -12 | 8  | 7  | 192.22 | 19.75 | 3 |
| -11 | 8  | 7  | 50.69  | 11.44 | 3 |
| 10  | -8 | -7 | 343.42 | 20.92 | 1 |
| -10 | 8  | 7  | 356.99 | 23.70 | 3 |
| -9  | 8  | 7  | 13.78  | 7.28  | 3 |
| 9   | -8 | -7 | 19.56  | 6.72  | 1 |
| -9  | 8  | 7  | 14.86  | 6.38  | 2 |
| -8  | 8  | 7  | 4.37   | 6.02  | 3 |
| -8  | 8  | 7  | -1.10  | 4.07  | 2 |
| 8   | -8 | -7 | -0.25  | 4.05  | 1 |
| 7   | -8 | -7 | 224.50 | 16.94 | 1 |
| -7  | 8  | 7  | 191.00 | 17.29 | 3 |
| 6   | -8 | -7 | 546.30 | 27.76 | 1 |
| 5   | -8 | -7 | 28.33  | 7.68  | 1 |
| 4   | -8 | -7 | 13.35  | 5.92  | 1 |
| 3   | -8 | -7 | 38.94  | 8.21  | 1 |
| 2   | -8 | -7 | 0.49   | 4.27  | 1 |
| 1   | -8 | -7 | 247.76 | 17.82 | 1 |
| 0   | -8 | -7 | 16.04  | 5.52  | 1 |



|     |    |    |        |       |   |
|-----|----|----|--------|-------|---|
| -1  | -8 | -7 | 117.30 | 13.58 | 1 |
| -2  | -8 | -7 | 126.88 | 14.26 | 1 |
| -3  | -8 | -7 | 225.30 | 17.65 | 1 |
| -4  | -8 | -7 | 31.28  | 7.86  | 1 |
| -5  | -8 | -7 | 47.18  | 13.17 | 2 |
| -6  | -8 | -7 | 129.86 | 20.79 | 2 |
| -7  | -8 | -7 | 38.94  | 11.66 | 2 |
| -8  | -8 | -7 | 54.54  | 14.07 | 2 |
| -9  | -8 | -7 | 8.43   | 9.01  | 2 |
| -17 | 9  | 7  | -1.30  | 7.51  | 3 |
| -16 | 9  | 7  | 132.77 | 20.24 | 3 |
| -15 | 9  | 7  | 27.25  | 11.00 | 3 |
| -14 | 9  | 7  | 13.04  | 8.69  | 3 |
| -13 | 9  | 7  | 24.91  | 9.63  | 3 |
| -12 | 9  | 7  | 73.70  | 13.84 | 3 |
| -11 | 9  | 7  | 185.61 | 18.55 | 3 |
| 10  | -9 | -7 | 20.94  | 7.08  | 1 |
| -10 | 9  | 7  | 30.00  | 9.72  | 3 |
| -9  | 9  | 7  | 6.88   | 5.97  | 2 |
| 9   | -9 | -7 | 7.14   | 6.03  | 1 |
| -9  | 9  | 7  | 10.31  | 6.89  | 3 |
| -8  | 9  | 7  | 3.09   | 7.07  | 3 |
| -8  | 9  | 7  | 22.17  | 7.69  | 2 |
| 8   | -9 | -7 | 26.99  | 8.02  | 1 |
| 7   | -9 | -7 | 4.55   | 5.44  | 1 |
| 6   | -9 | -7 | 5.84   | 6.07  | 1 |
| 5   | -9 | -7 | 99.18  | 13.25 | 1 |
| 4   | -9 | -7 | 3.03   | 4.81  | 1 |
| 3   | -9 | -7 | 417.44 | 24.31 | 1 |
| 2   | -9 | -7 | 342.42 | 21.82 | 1 |
| 1   | -9 | -7 | -0.32  | 4.31  | 1 |
| 0   | -9 | -7 | 135.25 | 15.46 | 1 |
| -1  | -9 | -7 | 297.04 | 20.92 | 1 |
| -2  | -9 | -7 | 88.55  | 13.28 | 1 |
| -3  | -9 | -7 | 41.28  | 9.63  | 1 |
| -4  | -9 | -7 | 133.90 | 15.64 | 1 |
| -5  | -9 | -7 | -6.59  | 5.86  | 2 |
| -6  | -9 | -7 | -3.15  | 7.28  | 2 |
| -7  | -9 | -7 | 15.76  | 8.86  | 2 |
| -8  | -9 | -7 | 21.82  | 11.67 | 2 |
| -17 | 10 | 7  | -1.06  | 8.60  | 3 |
| -16 | 10 | 7  | 7.45   | 9.36  | 3 |
| -15 | 10 | 7  | 0.41   | 8.28  | 3 |
| -14 | 10 | 7  | 15.71  | 9.75  | 3 |
| -13 | 10 | 7  | 8.33   | 8.74  | 3 |
| -12 | 10 | 7  | 5.14   | 6.36  | 3 |

|     |     |    |        |       |   |
|-----|-----|----|--------|-------|---|
| 11  | -10 | -7 | 19.55  | 7.73  | 1 |
| -11 | 10  | 7  | 13.87  | 8.73  | 3 |
| -10 | 10  | 7  | 152.10 | 17.98 | 3 |
| 10  | -10 | -7 | 119.10 | 14.09 | 1 |
| -9  | 10  | 7  | 516.41 | 31.14 | 3 |
| 9   | -10 | -7 | 494.39 | 27.99 | 1 |
| -9  | 10  | 7  | 554.21 | 29.00 | 2 |
| -8  | 10  | 7  | 351.13 | 25.13 | 3 |
| -8  | 10  | 7  | 343.54 | 22.22 | 2 |
| 8   | -10 | -7 | 315.78 | 21.84 | 1 |
| 7   | -10 | -7 | 12.90  | 6.95  | 1 |
| 6   | -10 | -7 | 22.78  | 8.19  | 1 |
| 5   | -10 | -7 | 17.25  | 7.51  | 1 |
| 4   | -10 | -7 | 8.65   | 6.18  | 1 |
| 3   | -10 | -7 | 4.31   | 5.11  | 1 |
| 2   | -10 | -7 | 19.61  | 6.80  | 1 |
| 1   | -10 | -7 | 90.47  | 13.70 | 1 |
| 0   | -10 | -7 | 7.33   | 6.43  | 1 |
| -1  | -10 | -7 | 84.16  | 13.70 | 1 |
| -2  | -10 | -7 | -0.24  | 5.33  | 1 |
| -3  | -10 | -7 | 97.92  | 14.33 | 1 |
| -4  | -10 | -7 | 42.68  | 11.13 | 1 |
| -5  | -10 | -7 | 38.53  | 13.05 | 2 |
| -6  | -10 | -7 | -2.31  | 8.60  | 2 |
| -7  | -10 | -7 | 1.42   | 7.90  | 2 |
| -16 | 11  | 7  | 77.95  | 16.86 | 3 |
| -15 | 11  | 7  | 27.56  | 12.10 | 3 |
| -14 | 11  | 7  | 6.21   | 8.73  | 3 |
| -13 | 11  | 7  | 0.69   | 8.47  | 3 |
| -12 | 11  | 7  | -1.98  | 7.37  | 3 |
| 11  | -11 | -7 | 13.41  | 7.20  | 1 |
| -11 | 11  | 7  | 14.35  | 8.83  | 3 |
| 10  | -11 | -7 | 2.65   | 6.44  | 1 |
| -10 | 11  | 7  | 3.85   | 7.61  | 3 |
| -9  | 11  | 7  | 2.79   | 5.77  | 2 |
| 9   | -11 | -7 | 6.43   | 6.59  | 1 |
| -9  | 11  | 7  | 17.58  | 8.91  | 3 |
| 8   | -11 | -7 | 10.66  | 6.93  | 1 |
| 7   | -11 | -7 | 2.21   | 5.97  | 1 |
| 6   | -11 | -7 | 1.95   | 5.96  | 1 |
| 5   | -11 | -7 | 2.98   | 6.11  | 1 |
| 4   | -11 | -7 | 55.12  | 11.62 | 1 |
| 3   | -11 | -7 | 87.59  | 13.83 | 1 |
| 2   | -11 | -7 | 56.45  | 11.39 | 1 |
| 1   | -11 | -7 | 25.45  | 8.43  | 1 |
| 0   | -11 | -7 | 4.92   | 5.82  | 1 |

|     |     |    |        |       |   |
|-----|-----|----|--------|-------|---|
| -1  | -11 | -7 | 2.24   | 6.14  | 1 |
| -2  | -11 | -7 | 36.80  | 10.60 | 1 |
| -3  | -11 | -7 | -0.51  | 6.17  | 1 |
| -4  | -11 | -7 | 5.28   | 7.16  | 1 |
| -5  | -11 | -7 | 21.58  | 10.30 | 2 |
| -6  | -11 | -7 | -6.81  | 7.29  | 2 |
| -12 | 12  | 7  | 88.76  | 16.61 | 3 |
| -11 | 12  | 7  | 5.14   | 8.33  | 3 |
| 11  | -12 | -7 | 20.82  | 7.97  | 1 |
| 10  | -12 | -7 | 19.57  | 8.33  | 1 |
| -10 | 12  | 7  | 34.09  | 11.55 | 3 |
| -9  | 12  | 7  | 65.69  | 12.27 | 2 |
| 9   | -12 | -7 | 56.84  | 11.76 | 1 |
| 8   | -12 | -7 | 4.62   | 6.06  | 1 |
| 7   | -12 | -7 | 2.60   | 5.71  | 1 |
| 6   | -12 | -7 | 37.41  | 10.21 | 1 |
| 5   | -12 | -7 | 18.70  | 8.09  | 1 |
| 4   | -12 | -7 | 12.45  | 7.61  | 1 |
| 3   | -12 | -7 | 3.20   | 5.98  | 1 |
| 2   | -12 | -7 | 1.69   | 6.08  | 1 |
| 1   | -12 | -7 | 2.42   | 7.03  | 1 |
| 0   | -12 | -7 | -3.73  | 5.97  | 1 |
| -1  | -12 | -7 | 178.18 | 20.86 | 1 |
| -2  | -12 | -7 | 72.19  | 14.12 | 1 |
| -3  | -12 | -7 | -0.64  | 6.91  | 1 |
| -4  | -12 | -7 | -2.15  | 7.31  | 1 |
| -5  | -12 | -7 | -0.81  | 7.74  | 2 |
| 11  | -13 | -7 | 90.48  | 14.56 | 1 |
| 10  | -13 | -7 | -2.73  | 6.77  | 1 |
| 9   | -13 | -7 | 20.62  | 9.86  | 1 |
| 8   | -13 | -7 | -1.22  | 6.69  | 1 |
| 7   | -13 | -7 | 7.79   | 8.21  | 1 |
| 6   | -13 | -7 | 70.08  | 14.28 | 1 |
| 5   | -13 | -7 | -4.90  | 7.29  | 1 |
| 4   | -13 | -7 | -3.60  | 7.45  | 1 |
| 3   | -13 | -7 | 12.06  | 7.71  | 1 |
| 2   | -13 | -7 | 12.60  | 7.93  | 1 |
| 1   | -13 | -7 | 24.60  | 10.25 | 1 |
| 0   | -13 | -7 | 0.39   | 6.15  | 1 |
| -1  | -13 | -7 | -6.30  | 6.43  | 1 |
| -2  | -13 | -7 | 70.90  | 14.00 | 1 |
| -3  | -13 | -7 | 2.48   | 7.29  | 1 |
| -4  | -13 | -7 | 8.01   | 9.38  | 1 |
| 11  | -14 | -7 | 10.71  | 8.55  | 1 |
| 10  | -14 | -7 | 17.10  | 9.44  | 1 |
| 9   | -14 | -7 | 1.79   | 7.48  | 1 |

|    |     |    |        |       |   |
|----|-----|----|--------|-------|---|
| 8  | -14 | -7 | 8.93   | 9.13  | 1 |
| 7  | -14 | -7 | -0.93  | 8.06  | 1 |
| 6  | -14 | -7 | -8.10  | 6.80  | 1 |
| 5  | -14 | -7 | 120.20 | 18.05 | 1 |
| 4  | -14 | -7 | -5.94  | 7.73  | 1 |
| 3  | -14 | -7 | 56.71  | 12.37 | 1 |
| 2  | -14 | -7 | 15.00  | 8.99  | 1 |
| 1  | -14 | -7 | 21.09  | 8.80  | 1 |
| 0  | -14 | -7 | 50.51  | 12.96 | 1 |
| -1 | -14 | -7 | 48.74  | 13.38 | 1 |
| -2 | -14 | -7 | -2.71  | 8.56  | 1 |
| -3 | -14 | -7 | -11.99 | 8.02  | 1 |
| 11 | -15 | -7 | 8.37   | 9.77  | 1 |
| 10 | -15 | -7 | 3.54   | 8.25  | 1 |
| 9  | -15 | -7 | 138.27 | 18.63 | 1 |
| 8  | -15 | -7 | 173.91 | 20.84 | 1 |
| 7  | -15 | -7 | -2.71  | 8.31  | 1 |
| 6  | -15 | -7 | 12.43  | 9.78  | 1 |
| 5  | -15 | -7 | 19.25  | 10.47 | 1 |
| 4  | -15 | -7 | 19.57  | 10.13 | 1 |
| 3  | -15 | -7 | -1.81  | 7.22  | 1 |
| 2  | -15 | -7 | 29.53  | 10.42 | 1 |
| 1  | -15 | -7 | 33.88  | 12.12 | 1 |
| 0  | -15 | -7 | 15.58  | 9.37  | 1 |
| -1 | -15 | -7 | 20.50  | 11.30 | 1 |
| -2 | -15 | -7 | -5.27  | 10.28 | 1 |
| 10 | -16 | -7 | 12.14  | 9.90  | 1 |
| 9  | -16 | -7 | -3.81  | 8.20  | 1 |
| 8  | -16 | -7 | 13.73  | 8.73  | 1 |
| 7  | -16 | -7 | 78.24  | 16.39 | 1 |
| 6  | -16 | -7 | 33.76  | 12.73 | 1 |
| 5  | -16 | -7 | 45.64  | 13.38 | 1 |
| 4  | -16 | -7 | 6.54   | 9.97  | 1 |
| 3  | -16 | -7 | -3.58  | 8.12  | 1 |
| 2  | -16 | -7 | 41.34  | 13.45 | 1 |
| 1  | -16 | -7 | 57.10  | 15.53 | 1 |
| 0  | -16 | -7 | 38.63  | 13.77 | 1 |
| 10 | -17 | -7 | 50.06  | 13.43 | 1 |
| 9  | -17 | -7 | 4.04   | 8.30  | 1 |
| 8  | -17 | -7 | 8.49   | 9.69  | 1 |
| 7  | -17 | -7 | 1.03   | 8.11  | 1 |
| 6  | -17 | -7 | -0.02  | 8.13  | 1 |
| 5  | -17 | -7 | -2.08  | 7.12  | 1 |
| 4  | -17 | -7 | -8.01  | 7.24  | 1 |
| 3  | -17 | -7 | 92.27  | 18.44 | 1 |
| 0  | -20 | 8  | -5.20  | 6.26  | 4 |

|    |     |    |        |       |   |
|----|-----|----|--------|-------|---|
| 0  | -20 | 8  | -11.92 | 6.02  | 1 |
| 1  | -20 | 8  | -7.63  | 6.84  | 4 |
| 1  | -20 | 8  | -11.02 | 6.50  | 1 |
| -2 | 20  | -8 | 1.07   | 9.97  | 2 |
| 2  | -20 | 8  | -1.20  | 7.40  | 1 |
| 2  | -20 | 8  | 20.58  | 8.38  | 4 |
| 3  | -20 | 8  | -6.14  | 7.49  | 1 |
| -3 | 20  | -8 | -12.33 | 7.49  | 2 |
| 3  | -20 | 8  | 3.54   | 8.18  | 4 |
| -4 | 20  | -8 | 74.20  | 16.93 | 2 |
| 4  | -20 | 8  | 58.22  | 12.71 | 1 |
| 4  | -20 | 8  | 68.95  | 13.52 | 4 |
| 5  | -20 | 8  | 27.05  | 11.36 | 4 |
| -5 | 20  | -8 | 1.21   | 7.05  | 2 |
| 5  | -20 | 8  | 34.92  | 12.66 | 1 |
| -6 | 20  | -8 | 8.95   | 8.16  | 2 |
| -3 | -19 | 8  | 0.05   | 8.55  | 4 |
| -3 | -19 | 8  | -3.00  | 10.54 | 1 |
| -2 | -19 | 8  | -18.98 | 7.23  | 1 |
| -2 | -19 | 8  | -11.86 | 7.26  | 4 |
| -1 | -19 | 8  | 0.02   | 7.60  | 4 |
| -1 | -19 | 8  | -21.36 | 5.74  | 1 |
| 0  | -19 | 8  | -10.62 | 7.09  | 4 |
| 0  | -19 | 8  | -10.59 | 7.23  | 1 |
| 1  | -19 | 8  | 2.11   | 8.59  | 4 |
| 1  | -19 | 8  | 24.55  | 11.27 | 1 |
| -1 | 19  | -8 | 28.25  | 12.13 | 2 |
| 2  | -19 | 8  | -7.87  | 7.69  | 4 |
| 2  | -19 | 8  | 2.60   | 8.72  | 1 |
| -2 | 19  | -8 | 5.50   | 8.51  | 2 |
| -3 | 19  | -8 | 9.02   | 9.66  | 2 |
| 3  | -19 | 8  | 1.28   | 7.51  | 1 |
| 3  | -19 | 8  | 20.14  | 9.81  | 4 |
| 4  | -19 | 8  | 1.50   | 8.28  | 1 |
| -4 | 19  | -8 | 23.45  | 10.76 | 2 |
| 4  | -19 | 8  | 19.49  | 10.12 | 4 |
| 5  | -19 | 8  | -0.32  | 9.07  | 1 |
| 5  | -19 | 8  | 11.71  | 9.22  | 4 |
| -5 | 19  | -8 | -3.32  | 7.84  | 2 |
| -6 | 19  | -8 | 0.08   | 7.71  | 2 |
| -7 | 19  | -8 | -2.54  | 6.39  | 2 |
| -8 | 19  | -8 | 0.33   | 5.90  | 2 |
| 3  | 18  | -8 | 2.22   | 7.57  | 1 |
| 2  | 18  | -8 | 4.56   | 7.30  | 1 |
| 1  | 18  | -8 | 5.44   | 7.37  | 1 |
| 0  | 18  | -8 | 87.64  | 15.69 | 1 |

|     |     |    |        |       |   |
|-----|-----|----|--------|-------|---|
| -1  | 18  | -8 | -7.12  | 7.65  | 2 |
| -1  | 18  | -8 | -3.38  | 5.45  | 1 |
| -2  | 18  | -8 | 274.81 | 24.98 | 2 |
| -3  | 18  | -8 | 95.64  | 17.64 | 2 |
| -4  | 18  | -8 | 5.16   | 8.08  | 2 |
| 4   | -18 | 8  | 2.01   | 7.39  | 4 |
| 4   | -18 | 8  | -15.55 | 5.90  | 1 |
| -5  | 18  | -8 | 36.21  | 11.71 | 2 |
| 5   | -18 | 8  | 51.64  | 12.61 | 1 |
| 5   | -18 | 8  | 53.11  | 12.89 | 4 |
| -6  | 18  | -8 | 6.39   | 8.39  | 2 |
| -7  | 18  | -8 | 34.14  | 12.70 | 2 |
| -8  | 18  | -8 | -1.75  | 6.57  | 2 |
| -9  | 18  | -8 | -4.86  | 6.43  | 2 |
| 6   | 17  | -8 | -4.54  | 6.39  | 1 |
| 5   | 17  | -8 | -5.25  | 6.54  | 1 |
| 4   | 17  | -8 | 125.05 | 18.84 | 1 |
| 3   | 17  | -8 | 16.29  | 9.09  | 1 |
| 2   | 17  | -8 | 42.47  | 10.92 | 1 |
| 1   | 17  | -8 | 9.52   | 6.02  | 1 |
| 0   | 17  | -8 | 32.80  | 9.13  | 1 |
| 0   | 17  | -8 | 46.33  | 13.07 | 2 |
| -1  | 17  | -8 | 11.36  | 8.62  | 2 |
| -1  | 17  | -8 | 12.14  | 6.52  | 1 |
| -2  | 17  | -8 | 5.19   | 5.76  | 1 |
| -2  | 17  | -8 | 11.67  | 9.27  | 2 |
| -3  | 17  | -8 | 41.24  | 10.04 | 1 |
| -3  | 17  | -8 | 23.03  | 9.76  | 2 |
| -4  | 17  | -8 | 29.90  | 10.25 | 2 |
| -4  | 17  | -8 | 24.45  | 8.64  | 1 |
| -5  | 17  | -8 | 27.84  | 11.03 | 2 |
| -6  | 17  | -8 | 18.87  | 9.74  | 2 |
| -7  | 17  | -8 | -9.85  | 6.09  | 2 |
| -8  | 17  | -8 | 28.67  | 11.26 | 2 |
| -9  | 17  | -8 | 6.05   | 7.69  | 2 |
| -10 | 17  | -8 | -1.11  | 6.47  | 2 |
| 7   | 16  | -8 | 32.02  | 11.55 | 1 |
| 6   | 16  | -8 | 82.44  | 15.61 | 1 |
| 5   | 16  | -8 | 57.07  | 13.51 | 1 |
| 4   | 16  | -8 | 5.02   | 7.82  | 1 |
| 3   | 16  | -8 | 3.77   | 7.83  | 1 |
| 2   | 16  | -8 | 6.96   | 5.63  | 1 |
| 1   | 16  | -8 | 11.06  | 6.51  | 1 |
| 0   | 16  | -8 | 625.60 | 35.38 | 2 |
| 0   | 16  | -8 | 557.71 | 33.01 | 1 |
| -1  | 16  | -8 | 12.14  | 6.57  | 1 |

|     |    |    |        |       |   |
|-----|----|----|--------|-------|---|
| -1  | 16 | -8 | 3.26   | 7.64  | 2 |
| -2  | 16 | -8 | -4.68  | 6.66  | 2 |
| -2  | 16 | -8 | 8.28   | 6.04  | 1 |
| -3  | 16 | -8 | 76.61  | 12.85 | 1 |
| -3  | 16 | -8 | 78.58  | 14.75 | 2 |
| -4  | 16 | -8 | 7.50   | 7.95  | 2 |
| -4  | 16 | -8 | 25.99  | 7.76  | 1 |
| -5  | 16 | -8 | 40.04  | 9.00  | 1 |
| -5  | 16 | -8 | 45.92  | 12.36 | 2 |
| -6  | 16 | -8 | 7.83   | 8.36  | 2 |
| -7  | 16 | -8 | 88.90  | 17.00 | 2 |
| -8  | 16 | -8 | 5.81   | 7.80  | 2 |
| -9  | 16 | -8 | 1.27   | 7.53  | 2 |
| -10 | 16 | -8 | -0.02  | 7.27  | 2 |
| -11 | 16 | -8 | -4.61  | 6.28  | 2 |
| 9   | 15 | -8 | 28.72  | 12.06 | 1 |
| 8   | 15 | -8 | 4.27   | 8.28  | 1 |
| 7   | 15 | -8 | 3.13   | 7.19  | 1 |
| 6   | 15 | -8 | 161.86 | 20.50 | 1 |
| 5   | 15 | -8 | 1.54   | 7.03  | 1 |
| 4   | 15 | -8 | 9.84   | 8.29  | 1 |
| 3   | 15 | -8 | 10.27  | 7.19  | 1 |
| 2   | 15 | -8 | 131.66 | 16.77 | 1 |
| 1   | 15 | -8 | 7.35   | 7.48  | 2 |
| 1   | 15 | -8 | 1.47   | 5.24  | 1 |
| 0   | 15 | -8 | 12.48  | 5.78  | 1 |
| 0   | 15 | -8 | 10.70  | 7.65  | 2 |
| -1  | 15 | -8 | 556.23 | 31.96 | 2 |
| -1  | 15 | -8 | 553.81 | 30.63 | 1 |
| -2  | 15 | -8 | 21.29  | 9.19  | 2 |
| -2  | 15 | -8 | 54.61  | 10.61 | 1 |
| -3  | 15 | -8 | 10.10  | 7.50  | 2 |
| -3  | 15 | -8 | 14.51  | 6.09  | 1 |
| -4  | 15 | -8 | 38.35  | 8.79  | 1 |
| -4  | 15 | -8 | 42.19  | 10.95 | 2 |
| -5  | 15 | -8 | 6.00   | 5.22  | 1 |
| -5  | 15 | -8 | 5.19   | 7.27  | 2 |
| -6  | 15 | -8 | 51.11  | 13.45 | 2 |
| -7  | 15 | -8 | -0.78  | 6.96  | 2 |
| -8  | 15 | -8 | 24.62  | 10.86 | 2 |
| -9  | 15 | -8 | 7.96   | 8.62  | 2 |
| -10 | 15 | -8 | 12.22  | 8.90  | 2 |
| -11 | 15 | -8 | -0.73  | 6.91  | 2 |
| -12 | 15 | -8 | 9.31   | 9.48  | 2 |
| 9   | 14 | -8 | 2.33   | 8.14  | 1 |
| 8   | 14 | -8 | 119.48 | 18.45 | 1 |

|     |    |    |        |       |   |
|-----|----|----|--------|-------|---|
| 7   | 14 | -8 | -1.27  | 6.87  | 1 |
| 6   | 14 | -8 | 11.12  | 8.54  | 1 |
| 5   | 14 | -8 | 48.37  | 12.78 | 1 |
| 4   | 14 | -8 | 0.04   | 6.58  | 1 |
| 3   | 14 | -8 | 116.78 | 16.06 | 1 |
| 2   | 14 | -8 | 46.21  | 10.28 | 1 |
| 1   | 14 | -8 | -2.91  | 3.58  | 1 |
| 1   | 14 | -8 | 2.59   | 6.24  | 2 |
| 0   | 14 | -8 | 19.21  | 6.35  | 1 |
| 0   | 14 | -8 | 22.66  | 9.11  | 2 |
| -1  | 14 | -8 | 44.44  | 10.59 | 2 |
| -1  | 14 | -8 | 42.02  | 9.10  | 1 |
| -2  | 14 | -8 | 19.56  | 7.89  | 2 |
| -2  | 14 | -8 | 10.31  | 4.92  | 1 |
| -3  | 14 | -8 | 27.02  | 6.99  | 1 |
| -3  | 14 | -8 | 38.02  | 10.19 | 2 |
| -4  | 14 | -8 | 30.76  | 7.69  | 1 |
| -4  | 14 | -8 | 38.58  | 10.32 | 2 |
| -5  | 14 | -8 | 55.24  | 12.37 | 2 |
| -5  | 14 | -8 | 67.35  | 10.34 | 1 |
| -6  | 14 | -8 | 17.80  | 9.04  | 2 |
| -7  | 14 | -8 | -1.65  | 6.73  | 2 |
| -8  | 14 | -8 | 135.18 | 20.04 | 2 |
| -9  | 14 | -8 | 74.72  | 16.66 | 2 |
| -10 | 14 | -8 | 216.10 | 26.25 | 2 |
| -11 | 14 | -8 | 3.50   | 7.21  | 2 |
| -12 | 14 | -8 | 21.74  | 10.69 | 2 |
| 10  | 13 | -8 | 10.26  | 9.94  | 1 |
| 9   | 13 | -8 | 33.37  | 10.63 | 1 |
| 8   | 13 | -8 | 2.56   | 7.84  | 1 |
| 7   | 13 | -8 | 42.12  | 12.03 | 1 |
| 6   | 13 | -8 | 3.30   | 7.06  | 1 |
| 5   | 13 | -8 | 2.68   | 5.92  | 1 |
| 4   | 13 | -8 | 4.41   | 5.94  | 1 |
| 3   | 13 | -8 | 4.73   | 5.80  | 1 |
| 2   | 13 | -8 | 27.40  | 7.48  | 1 |
| 2   | 13 | -8 | 26.30  | 8.54  | 2 |
| 1   | 13 | -8 | 382.87 | 23.47 | 1 |
| 1   | 13 | -8 | 347.29 | 23.06 | 2 |
| 0   | 13 | -8 | -0.69  | 3.14  | 1 |
| 0   | 13 | -8 | 8.87   | 5.97  | 2 |
| -1  | 13 | -8 | 2.29   | 5.13  | 2 |
| -1  | 13 | -8 | 8.05   | 4.47  | 1 |
| -2  | 13 | -8 | 24.18  | 6.85  | 1 |
| -2  | 13 | -8 | 22.59  | 8.07  | 2 |
| -3  | 13 | -8 | 22.85  | 6.56  | 1 |



|     |    |    |        |       |   |
|-----|----|----|--------|-------|---|
| -3  | 13 | -8 | 13.55  | 7.41  | 2 |
| -4  | 13 | -8 | 356.70 | 24.19 | 2 |
| -4  | 13 | -8 | 358.27 | 21.17 | 1 |
| -5  | 13 | -8 | -3.55  | 5.02  | 2 |
| -5  | 13 | -8 | -1.52  | 2.83  | 1 |
| -6  | 13 | -8 | 39.51  | 10.82 | 2 |
| -7  | 13 | -8 | 125.15 | 18.33 | 2 |
| -8  | 13 | -8 | 51.96  | 13.20 | 2 |
| -9  | 13 | -8 | 78.44  | 15.48 | 2 |
| -10 | 13 | -8 | 5.81   | 8.32  | 2 |
| -11 | 13 | -8 | 102.98 | 18.68 | 2 |
| -12 | 13 | -8 | 16.06  | 9.41  | 2 |
| -13 | 13 | -8 | 16.28  | 9.79  | 2 |
| 10  | 12 | -8 | 67.60  | 14.66 | 1 |
| 9   | 12 | -8 | 3.58   | 6.94  | 1 |
| 8   | 12 | -8 | 90.45  | 15.46 | 1 |
| 7   | 12 | -8 | 18.87  | 8.81  | 1 |
| 6   | 12 | -8 | 13.35  | 7.84  | 1 |
| 5   | 12 | -8 | 551.40 | 31.05 | 1 |
| 4   | 12 | -8 | 27.97  | 8.87  | 1 |
| 3   | 12 | -8 | 27.41  | 8.13  | 1 |
| 2   | 12 | -8 | 122.79 | 14.45 | 1 |
| 2   | 12 | -8 | 126.23 | 13.69 | 2 |
| 1   | 12 | -8 | 12.80  | 5.39  | 1 |
| 1   | 12 | -8 | 2.97   | 4.55  | 2 |
| 0   | 12 | -8 | 456.24 | 25.56 | 1 |
| 0   | 12 | -8 | 427.60 | 24.76 | 2 |
| -1  | 12 | -8 | 23.48  | 7.32  | 2 |
| -1  | 12 | -8 | 17.42  | 5.98  | 1 |
| -2  | 12 | -8 | 132.79 | 13.63 | 1 |
| -2  | 12 | -8 | 144.77 | 15.44 | 2 |
| -3  | 12 | -8 | -2.26  | 4.32  | 2 |
| -3  | 12 | -8 | 6.48   | 3.56  | 1 |
| -4  | 12 | -8 | -0.93  | 3.12  | 1 |
| -4  | 12 | -8 | 3.63   | 5.68  | 2 |
| -5  | 12 | -8 | 3.83   | 6.12  | 2 |
| -5  | 12 | -8 | 9.80   | 4.33  | 1 |
| -6  | 12 | -8 | 6.14   | 5.98  | 2 |
| -7  | 12 | -8 | 206.76 | 21.68 | 2 |
| -8  | 12 | -8 | 97.66  | 16.43 | 2 |
| -9  | 12 | -8 | 0.98   | 7.25  | 2 |
| -10 | 12 | -8 | 65.72  | 14.65 | 2 |
| -11 | 12 | -8 | 133.66 | 20.20 | 2 |
| -12 | 12 | -8 | 23.92  | 10.16 | 2 |
| -13 | 12 | -8 | 46.15  | 13.83 | 2 |
| 10  | 11 | -8 | 2.04   | 7.32  | 1 |

|     |    |    |        |       |   |
|-----|----|----|--------|-------|---|
| 9   | 11 | -8 | 10.73  | 7.73  | 1 |
| 8   | 11 | -8 | 16.41  | 7.63  | 1 |
| 7   | 11 | -8 | -0.87  | 5.24  | 1 |
| 6   | 11 | -8 | 47.07  | 10.80 | 1 |
| 5   | 11 | -8 | 31.48  | 8.70  | 1 |
| 4   | 11 | -8 | 55.73  | 10.84 | 1 |
| 3   | 11 | -8 | 17.50  | 6.73  | 1 |
| 2   | 11 | -8 | 41.40  | 8.44  | 2 |
| 2   | 11 | -8 | 41.70  | 8.58  | 1 |
| 1   | 11 | -8 | 19.95  | 6.38  | 1 |
| 1   | 11 | -8 | 30.29  | 6.84  | 2 |
| 0   | 11 | -8 | 95.55  | 11.80 | 2 |
| 0   | 11 | -8 | 87.45  | 11.19 | 1 |
| -1  | 11 | -8 | 211.59 | 15.47 | 1 |
| -1  | 11 | -8 | 218.78 | 15.86 | 2 |
| -2  | 11 | -8 | 180.02 | 13.80 | 1 |
| -2  | 11 | -8 | 170.55 | 14.20 | 2 |
| -3  | 11 | -8 | 34.55  | 7.09  | 1 |
| -3  | 11 | -8 | 34.52  | 8.41  | 2 |
| -4  | 11 | -8 | 51.81  | 8.60  | 1 |
| -4  | 11 | -8 | 39.08  | 9.75  | 2 |
| -5  | 11 | -8 | 10.99  | 6.02  | 2 |
| -5  | 11 | -8 | 4.16   | 3.72  | 1 |
| -6  | 11 | -8 | 137.41 | 17.52 | 2 |
| -7  | 11 | -8 | 0.40   | 5.29  | 2 |
| -8  | 11 | -8 | 329.83 | 25.09 | 2 |
| -9  | 11 | -8 | 296.05 | 24.58 | 2 |
| -10 | 11 | -8 | -3.14  | 6.59  | 2 |
| -11 | 11 | -8 | 0.47   | 6.97  | 2 |
| -12 | 11 | -8 | 8.19   | 7.81  | 2 |
| -13 | 11 | -8 | 48.08  | 14.42 | 2 |
| 10  | 10 | -8 | 36.14  | 9.68  | 1 |
| 9   | 10 | -8 | 68.65  | 12.29 | 1 |
| 8   | 10 | -8 | 33.26  | 9.23  | 1 |
| 7   | 10 | -8 | 190.23 | 18.04 | 1 |
| 6   | 10 | -8 | 70.96  | 11.90 | 1 |
| 5   | 10 | -8 | 1.53   | 4.77  | 1 |
| 4   | 10 | -8 | 2.47   | 4.32  | 1 |
| 3   | 10 | -8 | 63.52  | 10.50 | 1 |
| 3   | 10 | -8 | 63.76  | 9.37  | 2 |
| 2   | 10 | -8 | 42.98  | 8.43  | 1 |
| 1   | 10 | -8 | 36.28  | 7.38  | 2 |
| 1   | 10 | -8 | 23.16  | 5.58  | 1 |
| 0   | 10 | -8 | 280.60 | 17.64 | 1 |
| 0   | 10 | -8 | 261.57 | 16.89 | 2 |
| -1  | 10 | -8 | 111.87 | 11.97 | 2 |

|     |    |    |        |       |   |
|-----|----|----|--------|-------|---|
| -1  | 10 | -8 | 113.02 | 11.59 | 1 |
| -2  | 10 | -8 | 36.29  | 7.41  | 1 |
| -2  | 10 | -8 | 37.37  | 8.12  | 2 |
| -3  | 10 | -8 | 33.94  | 7.57  | 2 |
| -3  | 10 | -8 | 52.98  | 8.12  | 1 |
| -4  | 10 | -8 | 5.23   | 3.59  | 1 |
| -4  | 10 | -8 | 2.85   | 4.69  | 2 |
| -5  | 10 | -8 | 48.18  | 7.74  | 1 |
| -5  | 10 | -8 | 59.24  | 11.34 | 2 |
| -6  | 10 | -8 | 12.67  | 6.54  | 2 |
| -7  | 10 | -8 | 29.77  | 9.16  | 2 |
| -8  | 10 | -8 | 151.40 | 18.85 | 2 |
| -9  | 10 | -8 | 1.99   | 6.98  | 2 |
| -10 | 10 | -8 | 62.04  | 14.57 | 2 |
| -11 | 10 | -8 | 5.58   | 6.51  | 2 |
| -12 | 10 | -8 | 131.12 | 20.45 | 2 |
| -13 | 10 | -8 | 3.74   | 6.35  | 2 |
| 10  | 9  | -8 | 8.00   | 6.53  | 1 |
| 9   | 9  | -8 | 46.48  | 10.15 | 1 |
| 8   | 9  | -8 | 119.28 | 14.65 | 1 |
| 7   | 9  | -8 | 34.12  | 8.59  | 1 |
| 6   | 9  | -8 | 388.87 | 23.51 | 1 |
| 5   | 9  | -8 | 29.62  | 7.93  | 1 |
| 4   | 9  | -8 | 10.55  | 5.46  | 1 |
| 3   | 9  | -8 | 4.63   | 4.44  | 1 |
| 3   | 9  | -8 | 18.22  | 5.06  | 2 |
| 2   | 9  | -8 | 113.53 | 9.82  | 2 |
| 2   | 9  | -8 | 106.17 | 11.78 | 1 |
| 1   | 9  | -8 | 3.45   | 2.62  | 2 |
| 1   | 9  | -8 | 9.05   | 3.88  | 1 |
| 0   | 9  | -8 | 32.06  | 6.66  | 1 |
| 0   | 9  | -8 | 34.64  | 6.61  | 2 |
| -1  | 9  | -8 | 54.08  | 8.23  | 1 |
| -1  | 9  | -8 | 88.62  | 10.48 | 2 |
| -2  | 9  | -8 | 3.42   | 3.62  | 2 |
| -2  | 9  | -8 | 4.07   | 3.40  | 1 |
| -3  | 9  | -8 | 15.89  | 5.00  | 1 |
| -3  | 9  | -8 | 12.69  | 5.75  | 2 |
| -4  | 9  | -8 | -4.38  | 2.81  | 2 |
| -4  | 9  | -8 | -1.03  | 2.83  | 1 |
| -5  | 9  | -8 | 106.27 | 9.95  | 1 |
| -5  | 9  | -8 | 116.66 | 14.61 | 2 |
| -6  | 9  | -8 | 3.23   | 5.06  | 2 |
| -7  | 9  | -8 | 192.73 | 19.68 | 2 |
| -8  | 9  | -8 | 4.16   | 4.55  | 2 |
| -9  | 9  | -8 | 39.38  | 10.93 | 2 |

-10 9 -8 11.98 7.95 2  
-11 9 -8 47.20 12.32 2  
-12 9 -8 101.27 17.66 2  
-13 9 -8 2.28 6.65 2  
-14 9 -8 -7.42 5.91 2  
-14 -8 8 145.94 21.53 3  
-13 -8 8 82.58 15.94 3  
-12 -8 8 0.65 7.37 3  
-11 -8 8 1.27 7.08 3  
-10 -8 8 17.89 7.90 3  
10 8 -8 21.43 8.02 1  
9 8 -8 1.98 6.20 1  
-9 -8 8 5.52 5.17 3  
-8 -8 8 28.48 7.84 3  
8 8 -8 18.53 6.80 1  
-7 -8 8 35.68 8.18 3  
7 8 -8 25.11 7.56 1  
6 8 -8 24.80 7.10 1  
-6 -8 8 38.64 7.46 3  
5 8 -8 107.87 12.28 1  
-5 -8 8 125.95 10.66 3  
-4 -8 8 29.94 5.70 3  
4 8 -8 41.30 7.81 1  
-3 -8 8 200.53 11.72 3  
3 8 -8 191.49 12.42 2  
3 8 -8 180.24 14.21 1  
2 8 -8 112.52 11.67 1  
2 8 -8 122.23 9.63 2  
1 8 -8 524.50 23.25 2  
0 8 -8 364.93 18.90 2  
0 8 -8 361.60 19.76 1  
-1 8 -8 343.11 18.70 2  
-1 8 -8 280.37 17.04 1  
-2 8 -8 4.53 3.76 2  
-2 8 -8 3.92 2.97 1  
-3 8 -8 469.85 24.52 2  
-3 8 -8 446.43 21.50 1  
-4 8 -8 113.69 12.99 2  
-4 8 -8 85.96 8.99 1  
-5 8 -8 72.19 11.82 2  
-5 8 -8 80.19 8.33 1  
-6 8 -8 5.73 5.70 2  
-7 8 -8 5.94 5.33 2  
-8 8 -8 76.89 13.70 2  
-9 8 -8 -4.89 3.88 2  
-10 8 -8 40.17 11.45 2

|     |    |    |        |       |   |
|-----|----|----|--------|-------|---|
| -11 | 8  | -8 | 178.96 | 20.85 | 2 |
| -12 | 8  | -8 | 65.60  | 14.59 | 2 |
| -13 | 8  | -8 | 7.93   | 7.00  | 2 |
| -14 | 8  | -8 | 4.65   | 6.73  | 2 |
| -15 | -7 | 8  | 25.62  | 11.77 | 3 |
| -14 | -7 | 8  | 61.55  | 14.40 | 3 |
| -13 | -7 | 8  | -2.68  | 7.18  | 3 |
| -12 | -7 | 8  | 104.83 | 16.72 | 3 |
| -11 | -7 | 8  | 47.73  | 11.38 | 3 |
| -10 | -7 | 8  | 476.21 | 28.84 | 3 |
| 10  | 7  | -8 | 492.76 | 27.33 | 1 |
| -9  | -7 | 8  | 52.67  | 10.32 | 3 |
| 9   | 7  | -8 | 58.99  | 10.46 | 1 |
| 8   | 7  | -8 | 69.83  | 10.76 | 1 |
| -8  | -7 | 8  | 89.45  | 11.96 | 3 |
| 7   | 7  | -8 | 311.44 | 19.79 | 1 |
| -7  | -7 | 8  | 313.52 | 19.37 | 3 |
| 6   | 7  | -8 | 41.53  | 8.13  | 1 |
| -6  | -7 | 8  | 42.35  | 7.82  | 3 |
| -5  | -7 | 8  | 252.59 | 15.34 | 3 |
| 5   | 7  | -8 | 236.66 | 16.78 | 1 |
| -4  | -7 | 8  | 63.02  | 7.33  | 3 |
| 4   | 7  | -8 | 41.85  | 8.10  | 1 |
| 3   | 7  | -8 | 174.38 | 10.86 | 2 |
| -3  | -7 | 8  | 158.20 | 10.34 | 3 |
| 3   | 7  | -8 | 145.91 | 12.38 | 1 |
| 2   | 7  | -8 | 74.94  | 7.74  | 2 |
| -2  | -7 | 8  | 82.27  | 7.67  | 3 |
| 2   | 7  | -8 | 74.72  | 9.49  | 1 |
| 1   | 7  | -8 | 3.03   | 2.52  | 2 |
| 1   | 7  | -8 | 2.09   | 3.04  | 1 |
| 0   | 7  | -8 | -0.50  | 2.32  | 1 |
| 0   | 7  | -8 | -0.80  | 1.70  | 2 |
| -1  | 7  | -8 | 74.83  | 8.60  | 1 |
| -1  | 7  | -8 | 77.51  | 8.98  | 2 |
| -2  | 7  | -8 | 61.46  | 8.89  | 2 |
| -2  | 7  | -8 | 47.71  | 7.10  | 1 |
| -3  | 7  | -8 | 46.72  | 6.67  | 1 |
| -3  | 7  | -8 | 44.72  | 8.56  | 2 |
| -4  | 7  | -8 | 23.73  | 4.96  | 1 |
| -4  | 7  | -8 | 13.59  | 5.72  | 2 |
| -5  | 7  | -8 | 175.21 | 11.40 | 1 |
| -5  | 7  | -8 | 211.59 | 16.49 | 2 |
| -6  | 7  | -8 | 5.70   | 5.09  | 2 |
| -7  | 7  | -8 | 13.75  | 6.17  | 2 |
| -8  | 7  | -8 | 66.03  | 12.76 | 2 |

-9 7 -8 20.44 8.03 2  
-10 7 -8 96.38 15.88 2  
-11 7 -8 122.76 18.03 2  
-12 7 -8 4.88 6.15 2  
-13 7 -8 20.91 9.45 2  
-14 7 -8 7.62 8.24 2  
-15 -6 8 4.21 9.39 3  
-14 -6 8 19.53 10.07 3  
-13 -6 8 146.48 19.81 3  
-12 -6 8 18.61 8.10 3  
-11 -6 8 161.92 18.20 3  
-10 -6 8 -1.18 5.02 3  
10 6 -8 0.34 4.65 1  
9 6 -8 253.91 17.95 1  
-9 -6 8 265.63 19.51 3  
-8 -6 8 2.15 4.22 3  
8 6 -8 0.24 3.24 1  
-7 -6 8 1.99 4.07 3  
7 6 -8 4.13 3.79 1  
6 6 -8 41.15 8.11 1  
-6 -6 8 51.54 8.20 3  
5 6 -8 4.40 3.95 1  
-5 -6 8 7.75 3.91 3  
-4 -6 8 648.19 27.27 3  
4 6 -8 691.02 30.08 1  
3 6 -8 513.44 24.52 1  
-3 -6 8 505.79 21.88 3  
3 6 -8 496.90 20.13 2  
2 6 -8 21.18 4.19 2  
-2 -6 8 17.90 4.65 3  
2 6 -8 10.79 4.52 1  
1 6 -8 16.67 3.94 2  
1 6 -8 9.01 3.64 1  
0 6 -8 330.35 17.78 1  
-1 6 -8 581.00 25.70 2  
-1 6 -8 599.84 25.64 1  
-2 6 -8 733.05 29.48 1  
-2 6 -8 758.16 32.15 2  
-3 6 -8 270.43 15.06 1  
-3 6 -8 301.83 18.27 2  
-4 6 -8 183.26 15.01 2  
-4 6 -8 190.61 11.69 1  
-5 6 -8 364.62 22.33 2  
-5 6 -8 372.80 17.34 1  
-6 6 -8 -4.05 3.28 2  
-7 6 -8 43.98 9.59 2

-8 6 -8 85.62 14.03 2  
-9 6 -8 286.21 22.63 2  
-10 6 -8 21.11 8.38 2  
-11 6 -8 24.51 8.74 2  
-12 6 -8 12.89 7.43 2  
-13 6 -8 0.11 5.86 2  
-14 6 -8 12.55 8.64 2  
-16 -5 8 41.45 14.55 3  
-15 -5 8 59.05 14.83 3  
-14 -5 8 -3.35 6.87 3  
-13 -5 8 173.13 20.55 3  
-12 -5 8 24.09 8.74 3  
-11 -5 8 37.64 10.01 3  
-10 -5 8 75.22 12.37 3  
10 5 -8 58.22 9.55 1  
-9 -5 8 217.34 17.55 3  
9 5 -8 226.74 16.47 1  
-8 -5 8 195.02 15.77 3  
8 5 -8 213.75 15.38 1  
7 5 -8 319.05 18.92 1  
-7 -5 8 260.27 17.76 3  
-6 -5 8 0.83 3.54 3  
6 5 -8 -2.47 2.78 1  
-5 -5 8 0.30 2.61 3  
5 5 -8 1.45 3.27 1  
-4 -5 8 1412.32 48.54 3  
4 5 -8 1388.66 50.37 1  
3 5 -8 91.10 6.27 2  
3 5 -8 72.79 9.13 1  
-3 -5 8 83.90 8.26 3  
2 5 -8 256.82 12.57 2  
2 5 -8 278.97 16.06 1  
-2 -5 8 281.50 15.14 3  
1 5 -8 376.33 19.36 1  
1 5 -8 388.21 17.03 2  
0 5 -8 1039.45 37.61 2  
-1 5 -8 -2.84 2.62 2  
-1 5 -8 2.86 2.40 1  
-2 5 -8 72.70 7.84 1  
-2 5 -8 62.78 8.73 2  
-3 5 -8 542.14 22.49 1  
-3 5 -8 483.51 25.05 2  
-4 5 -8 21.07 4.40 1  
-4 5 -8 34.24 7.78 2  
-5 5 -8 54.32 10.20 2  
-6 5 -8 0.72 4.50 2

-7 5 -8 1.97 4.90 2  
-8 5 -8 74.79 13.20 2  
-9 5 -8 40.39 10.85 2  
-10 5 -8 10.35 6.67 2  
-11 5 -8 60.18 13.54 2  
-12 5 -8 21.02 9.48 2  
-13 5 -8 51.49 13.18 2  
-16 -4 8 5.52 11.08 3  
-15 -4 8 26.31 10.88 3  
-14 -4 8 27.27 10.34 3  
-13 -4 8 345.66 26.59 3  
-12 -4 8 6.20 6.18 3  
-11 -4 8 461.00 28.60 3  
-10 -4 8 9.85 6.13 3  
10 4 -8 5.54 4.47 1  
-9 -4 8 56.02 10.27 3  
9 4 -8 29.91 7.64 1  
8 4 -8 5.14 3.95 1  
-8 -4 8 1.48 3.91 3  
7 4 -8 160.58 13.32 1  
-7 -4 8 163.96 13.50 3  
-6 -4 8 2073.29 70.89 3  
6 4 -8 2153.84 70.84 1  
-5 -4 8 23.52 5.30 3  
5 4 -8 19.28 5.71 1  
4 4 -8 2.48 2.87 1  
-4 -4 8 5.77 3.36 3  
3 4 -8 1289.27 45.73 1  
3 4 -8 1267.77 39.49 2  
-3 -4 8 1225.45 44.11 3  
-2 -4 8 531.62 23.24 3  
2 4 -8 515.51 19.68 2  
2 4 -8 522.34 23.93 1  
1 4 -8 285.28 15.83 1  
1 4 -8 289.07 13.99 2  
0 4 -8 1683.89 54.68 1  
0 4 -8 1584.27 53.91 2  
-1 4 -8 301.13 15.63 1  
-1 4 -8 268.58 15.75 2  
-2 4 -8 106.55 8.69 1  
-2 4 -8 99.46 10.48 2  
-3 4 -8 160.70 12.67 2  
-3 4 -8 138.96 10.05 1  
-4 4 -8 33.71 7.39 2  
-4 4 -8 43.86 5.97 1  
-5 4 -8 65.80 10.36 2



-6 4 -8 504.66 27.65 2  
-7 4 -8 429.51 25.94 2  
-8 4 -8 11.48 6.30 2  
-9 4 -8 3.15 4.94 2  
-10 4 -8 115.24 16.83 2  
-11 4 -8 16.66 7.93 2  
-12 4 -8 193.57 22.83 2  
-13 4 -8 2.24 7.74 2  
-16 -3 8 -9.47 7.44 3  
-15 -3 8 111.03 18.85 3  
-14 -3 8 24.30 10.24 3  
-13 -3 8 3.62 6.76 3  
-12 -3 8 500.20 31.28 3  
-11 -3 8 18.37 7.58 3  
10 3 -8 10.25 4.96 1  
-10 -3 8 35.85 8.87 3  
-9 -3 8 44.21 9.12 3  
9 3 -8 42.96 8.12 1  
-8 -3 8 21.98 6.95 3  
8 3 -8 25.51 6.56 1  
-7 -3 8 184.82 14.21 3  
7 3 -8 200.35 14.45 1  
6 3 -8 516.75 24.39 1  
-6 -3 8 500.10 24.20 3  
5 3 -8 614.31 27.21 1  
-5 -3 8 579.09 26.22 3  
4 3 -8 198.91 13.39 1  
-4 -3 8 199.38 12.74 3  
-3 -3 8 137.21 10.38 3  
3 3 -8 126.78 10.33 1  
3 3 -8 109.37 5.99 2  
2 3 -8 679.41 24.00 2  
2 3 -8 683.16 27.85 1  
1 3 -8 730.40 29.41 1  
1 3 -8 762.94 27.59 2  
0 3 -8 805.43 29.71 1  
0 3 -8 680.37 27.85 2  
-1 3 -8 1919.62 62.80 1  
-1 3 -8 2014.83 64.91 2  
-2 3 -8 3.44 3.18 2  
-2 3 -8 5.70 2.99 1  
-3 3 -8 422.63 22.28 2  
-3 3 -8 438.14 19.44 1  
-4 3 -8 307.74 15.43 1  
-4 3 -8 313.50 19.30 2  
-5 3 -8 2.48 3.85 2

|     |    |    |         |       |   |
|-----|----|----|---------|-------|---|
| -6  | 3  | -8 | 636.40  | 32.16 | 2 |
| -7  | 3  | -8 | 12.79   | 6.48  | 2 |
| -8  | 3  | -8 | 515.65  | 30.49 | 2 |
| -9  | 3  | -8 | 2.83    | 5.19  | 2 |
| -10 | 3  | -8 | 52.37   | 11.96 | 2 |
| -11 | 3  | -8 | 1.88    | 5.00  | 2 |
| -12 | 3  | -8 | 1.28    | 6.22  | 2 |
| -13 | 3  | -8 | 118.57  | 20.35 | 2 |
| -17 | -2 | 8  | -0.81   | 9.43  | 3 |
| -16 | -2 | 8  | 12.71   | 10.30 | 3 |
| -15 | -2 | 8  | 6.44    | 8.67  | 3 |
| -14 | -2 | 8  | 7.76    | 8.47  | 3 |
| -13 | -2 | 8  | 2.32    | 6.91  | 3 |
| -12 | -2 | 8  | 4.09    | 6.06  | 3 |
| 11  | 2  | -8 | 2.17    | 4.24  | 1 |
| -11 | -2 | 8  | 5.80    | 5.49  | 3 |
| -10 | -2 | 8  | 3.46    | 4.43  | 3 |
| 10  | 2  | -8 | -0.08   | 2.64  | 1 |
| 9   | 2  | -8 | 288.02  | 17.96 | 1 |
| -9  | -2 | 8  | 300.18  | 20.37 | 3 |
| -8  | -2 | 8  | 1820.48 | 65.71 | 3 |
| 8   | 2  | -8 | 1847.85 | 62.69 | 1 |
| -7  | -2 | 8  | 195.28  | 14.36 | 3 |
| 7   | 2  | -8 | 175.07  | 13.46 | 1 |
| -6  | -2 | 8  | 9.37    | 4.18  | 3 |
| 6   | 2  | -8 | 7.94    | 4.26  | 1 |
| 5   | 2  | -8 | 320.30  | 17.74 | 1 |
| -5  | -2 | 8  | 334.09  | 18.02 | 3 |
| 4   | 2  | -8 | 10.15   | 4.11  | 1 |
| -4  | -2 | 8  | 15.16   | 4.53  | 3 |
| -3  | -2 | 8  | 93.76   | 9.73  | 3 |
| 3   | 2  | -8 | 77.71   | 4.86  | 2 |
| 3   | 2  | -8 | 80.70   | 8.81  | 1 |
| 2   | 2  | -8 | 68.09   | 7.83  | 1 |
| 2   | 2  | -8 | 66.18   | 5.70  | 2 |
| 1   | 2  | -8 | 883.49  | 31.62 | 2 |
| 1   | 2  | -8 | 901.26  | 33.58 | 1 |
| 0   | 2  | -8 | 20.12   | 4.46  | 2 |
| 0   | 2  | -8 | 25.72   | 5.06  | 1 |
| -1  | 2  | -8 | 391.55  | 19.14 | 2 |
| -1  | 2  | -8 | 404.77  | 18.74 | 1 |
| -2  | 2  | -8 | 8.25    | 3.82  | 2 |
| -2  | 2  | -8 | 9.19    | 3.66  | 1 |
| -3  | 2  | -8 | 378.01  | 20.57 | 2 |
| -3  | 2  | -8 | 371.99  | 17.62 | 1 |
| -4  | 2  | -8 | 1743.34 | 61.29 | 2 |

-4 2 -8 1649.71 54.45 1  
-5 2 -8 281.16 18.72 2  
-6 2 -8 1.84 4.15 2  
-7 2 -8 74.22 12.58 2  
-8 2 -8 112.83 15.89 2  
-9 2 -8 157.01 19.41 2  
-10 2 -8 25.05 8.98 2  
-11 2 -8 143.46 20.49 2  
-12 2 -8 -2.47 5.84 2  
-13 2 -8 110.24 19.55 2  
-17 -1 8 9.52 11.05 3  
-16 -1 8 3.14 8.58 3  
-15 -1 8 32.48 13.06 3  
-14 -1 8 113.74 17.88 3  
-13 -1 8 16.31 7.89 3  
-12 -1 8 37.27 10.56 3  
-11 -1 8 134.06 15.91 3  
11 1 -8 169.33 13.92 1  
-10 -1 8 480.20 27.94 3  
-9 -1 8 104.76 13.00 3  
9 1 -8 103.24 11.15 1  
8 1 -8 32.71 6.89 1  
-8 -1 8 23.32 6.88 3  
-7 -1 8 121.59 12.04 3  
7 1 -8 135.60 11.14 1  
6 1 -8 144.81 11.69 1  
-6 -1 8 142.28 11.86 3  
-5 -1 8 60.72 8.32 3  
5 1 -8 69.95 8.51 1  
-4 -1 8 14.41 4.59 3  
4 1 -8 6.88 3.81 1  
-3 -1 8 0.02 3.04 3  
3 1 -8 2.25 2.57 1  
3 1 -8 2.15 1.80 2  
2 1 -8 437.80 20.33 1  
2 1 -8 439.12 17.42 2  
1 1 -8 49.89 5.66 2  
1 1 -8 48.84 6.66 1  
-1 1 -8 262.44 14.90 2  
-1 1 -8 266.89 14.33 1  
-2 1 -8 36.52 6.87 2  
-2 1 -8 23.29 4.80 1  
-3 1 -8 9.28 4.55 2  
-3 1 -8 12.77 3.80 1  
-4 1 -8 233.90 16.52 2  
-4 1 -8 220.93 12.78 1

-5 1 -8 78.07 11.33 2  
-6 1 -8 304.54 21.27 2  
-7 1 -8 118.44 15.54 2  
-8 1 -8 25.80 8.66 2  
-9 1 -8 6.13 6.49 2  
-10 1 -8 69.87 14.09 2  
-11 1 -8 184.48 23.30 2  
-12 1 -8 23.84 10.93 2  
-13 1 -8 122.51 20.56 2  
-17 0 8 2.28 9.10 3  
-16 0 8 32.78 11.18 3  
-15 0 8 11.06 7.52 3  
-14 0 8 28.45 9.69 3  
-13 0 8 98.98 16.00 3  
-12 0 8 41.43 10.48 3  
11 0 -8 453.86 23.49 1  
-11 0 8 465.07 28.45 3  
-10 0 8 652.24 33.34 3  
9 0 -8 98.22 10.61 1  
-9 0 8 81.10 11.56 3  
-8 0 8 8.25 4.65 3  
8 0 -8 10.91 4.72 1  
7 0 -8 126.81 10.96 1  
-7 0 8 114.59 11.74 3  
-6 0 8 97.48 10.55 3  
6 0 -8 81.04 9.31 1  
5 0 -8 74.73 8.81 1  
-5 0 8 68.97 9.12 3  
-4 0 8 136.40 11.19 3  
4 0 -8 122.05 10.34 1  
4 0 -8 112.68 5.95 2  
3 0 -8 493.50 22.46 1  
3 0 -8 508.39 18.42 2  
-3 0 8 496.89 24.34 3  
2 0 -8 177.04 11.76 1  
2 0 -8 157.62 9.35 2  
1 0 -8 33.37 5.90 1  
1 0 -8 27.87 5.04 2  
0 0 -8 221.64 13.69 2  
0 0 -8 302.08 15.29 1  
-1 0 -8 66.26 7.47 1  
-1 0 -8 76.10 8.64 2  
-2 0 -8 1191.97 42.02 1  
-2 0 -8 1216.51 45.35 2  
-3 0 -8 97.82 8.49 1  
-3 0 -8 70.36 10.20 2

|     |    |    |        |       |   |
|-----|----|----|--------|-------|---|
| -4  | 0  | -8 | -1.45  | 3.51  | 2 |
| -4  | 0  | -8 | 3.53   | 2.82  | 1 |
| -5  | 0  | -8 | 261.88 | 19.03 | 2 |
| -6  | 0  | -8 | 19.48  | 6.91  | 2 |
| -7  | 0  | -8 | 1.47   | 4.80  | 2 |
| -8  | 0  | -8 | 9.58   | 7.17  | 2 |
| -9  | 0  | -8 | 69.96  | 14.48 | 2 |
| -10 | 0  | -8 | 9.81   | 6.03  | 2 |
| -11 | 0  | -8 | 50.84  | 13.18 | 2 |
| -12 | 0  | -8 | 60.32  | 15.52 | 2 |
| -17 | 1  | 8  | 27.89  | 11.80 | 3 |
| -16 | 1  | 8  | 36.46  | 12.40 | 3 |
| -15 | 1  | 8  | 36.18  | 11.20 | 3 |
| -14 | 1  | 8  | 75.26  | 14.76 | 3 |
| -13 | 1  | 8  | 33.19  | 10.23 | 3 |
| -12 | 1  | 8  | 70.47  | 13.20 | 3 |
| 11  | -1 | -8 | 4.65   | 4.42  | 1 |
| -11 | 1  | 8  | 2.31   | 4.58  | 3 |
| 10  | -1 | -8 | 5.13   | 3.40  | 1 |
| -10 | 1  | 8  | 10.60  | 5.99  | 3 |
| 9   | -1 | -8 | 369.96 | 19.94 | 1 |
| -9  | 1  | 8  | 312.06 | 20.79 | 3 |
| 8   | -1 | -8 | 4.26   | 3.75  | 1 |
| -8  | 1  | 8  | 14.58  | 5.39  | 3 |
| -7  | 1  | 8  | 23.09  | 6.83  | 3 |
| 7   | -1 | -8 | 42.73  | 7.43  | 1 |
| 6   | -1 | -8 | 114.19 | 10.85 | 1 |
| -6  | 1  | 8  | 106.14 | 11.26 | 3 |
| 5   | -1 | -8 | 191.16 | 13.14 | 1 |
| -5  | 1  | 8  | 180.47 | 13.63 | 3 |
| -4  | 1  | 8  | 841.21 | 35.66 | 3 |
| 4   | -1 | -8 | 836.87 | 33.41 | 1 |
| 4   | -1 | -8 | 842.00 | 27.73 | 2 |
| 3   | -1 | -8 | 32.34  | 4.32  | 2 |
| 3   | -1 | -8 | 31.57  | 6.14  | 1 |
| 2   | -1 | -8 | 98.80  | 9.75  | 1 |
| 2   | -1 | -8 | 129.05 | 8.62  | 2 |
| 1   | -1 | -8 | 1.28   | 2.52  | 2 |
| 1   | -1 | -8 | 1.75   | 2.44  | 1 |
| 0   | -1 | -8 | 34.49  | 6.42  | 2 |
| 0   | -1 | -8 | 53.09  | 7.09  | 1 |
| -1  | -1 | -8 | 3.41   | 3.24  | 2 |
| -1  | -1 | -8 | 2.36   | 2.64  | 1 |
| -2  | -1 | -8 | 33.13  | 7.20  | 2 |
| -2  | -1 | -8 | 33.41  | 5.97  | 1 |
| -3  | -1 | -8 | 52.97  | 7.13  | 1 |

|     |    |    |        |       |   |
|-----|----|----|--------|-------|---|
| -3  | -1 | -8 | 58.66  | 9.90  | 2 |
| -4  | -1 | -8 | 2.50   | 2.92  | 1 |
| -4  | -1 | -8 | 6.95   | 4.83  | 2 |
| -5  | -1 | -8 | 1.98   | 4.31  | 2 |
| -6  | -1 | -8 | 22.83  | 8.04  | 2 |
| -7  | -1 | -8 | 80.19  | 14.21 | 2 |
| -8  | -1 | -8 | 130.17 | 18.43 | 2 |
| -9  | -1 | -8 | 247.87 | 22.22 | 2 |
| -10 | -1 | -8 | 3.89   | 5.37  | 2 |
| -11 | -1 | -8 | 20.17  | 9.02  | 2 |
| -12 | -1 | -8 | 42.65  | 13.35 | 2 |
| -17 | 2  | 8  | -4.93  | 6.36  | 3 |
| -16 | 2  | 8  | 3.97   | 7.27  | 3 |
| -15 | 2  | 8  | 113.49 | 18.66 | 3 |
| -14 | 2  | 8  | 13.09  | 8.71  | 3 |
| -13 | 2  | 8  | 22.82  | 9.20  | 3 |
| -12 | 2  | 8  | 197.54 | 19.51 | 3 |
| -11 | 2  | 8  | 20.76  | 7.48  | 3 |
| 11  | -2 | -8 | 25.13  | 6.69  | 1 |
| -10 | 2  | 8  | 135.91 | 15.10 | 3 |
| -9  | 2  | 8  | 55.06  | 9.80  | 3 |
| 9   | -2 | -8 | 59.96  | 9.05  | 1 |
| -8  | 2  | 8  | 36.95  | 8.13  | 3 |
| 8   | -2 | -8 | 37.67  | 7.32  | 1 |
| -7  | 2  | 8  | 140.53 | 12.51 | 3 |
| 7   | -2 | -8 | 145.99 | 12.03 | 1 |
| -6  | 2  | 8  | 95.65  | 11.27 | 3 |
| 6   | -2 | -8 | 110.08 | 10.94 | 1 |
| 5   | -2 | -8 | 254.39 | 15.58 | 1 |
| -5  | 2  | 8  | 218.65 | 15.79 | 3 |
| -4  | 2  | 8  | 154.38 | 13.05 | 3 |
| 4   | -2 | -8 | 135.79 | 11.31 | 1 |
| 3   | -2 | -8 | 19.50  | 5.12  | 1 |
| 2   | -2 | -8 | 427.54 | 21.33 | 1 |
| 1   | -2 | -8 | 335.94 | 18.27 | 1 |
| 0   | -2 | -8 | 90.47  | 9.87  | 2 |
| 0   | -2 | -8 | 118.66 | 10.17 | 1 |
| -1  | -2 | -8 | 337.24 | 19.40 | 2 |
| -1  | -2 | -8 | 324.92 | 17.96 | 1 |
| -2  | -2 | -8 | 0.73   | 2.78  | 1 |
| -2  | -2 | -8 | 4.57   | 4.15  | 2 |
| -3  | -2 | -8 | 0.49   | 2.78  | 1 |
| -3  | -2 | -8 | 1.07   | 3.83  | 2 |
| -4  | -2 | -8 | 290.66 | 20.30 | 2 |
| -4  | -2 | -8 | 254.30 | 15.94 | 1 |
| -5  | -2 | -8 | 60.37  | 11.93 | 2 |

-6 -2 -8 -3.92 4.12 2  
-7 -2 -8 5.76 6.25 2  
-8 -2 -8 -4.76 5.12 2  
-9 -2 -8 26.88 9.04 2  
-10 -2 -8 8.37 7.98 2  
-11 -2 -8 126.10 20.70 2  
-12 -2 -8 108.79 20.46 2  
-17 3 8 2.79 7.20 3  
-16 3 8 0.70 6.85 3  
-15 3 8 55.06 13.91 3  
-14 3 8 249.25 24.04 3  
-13 3 8 427.14 28.72 3  
-12 3 8 31.23 8.99 3  
11 -3 -8 3.60 4.32 1  
-11 3 8 5.87 5.85 3  
-10 3 8 16.34 6.16 3  
9 -3 -8 50.43 8.48 1  
-9 3 8 66.97 10.73 3  
8 -3 -8 967.47 38.04 1  
-8 3 8 943.01 40.69 3  
7 -3 -8 89.47 10.29 1  
-7 3 8 98.62 11.80 3  
6 -3 -8 4.68 4.48 1  
-6 3 8 7.36 5.09 3  
5 -3 -8 366.73 19.98 1  
-5 3 8 391.47 22.59 3  
4 -3 -8 29.44 6.85 1  
3 -3 -8 61.90 8.66 1  
2 -3 -8 35.12 6.88 1  
1 -3 -8 138.06 11.99 1  
0 -3 -8 207.98 14.83 2  
0 -3 -8 203.61 14.43 1  
-1 -3 -8 49.94 8.06 1  
-1 -3 -8 51.22 9.05 2  
-2 -3 -8 6.39 4.65 2  
-2 -3 -8 9.92 4.59 1  
-3 -3 -8 -1.67 3.53 2  
-3 -3 -8 1.87 3.70 1  
-4 -3 -8 11.41 5.21 1  
-4 -3 -8 8.42 5.82 2  
-5 -3 -8 155.96 18.10 2  
-6 -3 -8 39.97 11.34 2  
-7 -3 -8 177.45 20.97 2  
-8 -3 -8 34.76 11.03 2  
-9 -3 -8 0.02 4.96 2  
-10 -3 -8 11.38 8.09 2

|     |    |    |        |       |   |
|-----|----|----|--------|-------|---|
| -11 | -3 | -8 | -4.80  | 7.82  | 2 |
| -17 | 4  | 8  | 6.17   | 8.78  | 3 |
| -16 | 4  | 8  | 6.57   | 8.25  | 3 |
| -15 | 4  | 8  | 8.99   | 8.20  | 3 |
| -14 | 4  | 8  | 329.66 | 26.30 | 3 |
| -13 | 4  | 8  | 47.48  | 11.54 | 3 |
| -12 | 4  | 8  | 231.70 | 19.95 | 3 |
| 11  | -4 | -8 | 3.52   | 3.87  | 1 |
| -11 | 4  | 8  | 4.91   | 5.42  | 3 |
| 10  | -4 | -8 | 6.93   | 4.45  | 1 |
| -10 | 4  | 8  | 7.55   | 6.01  | 3 |
| -9  | 4  | 8  | 4.01   | 5.57  | 3 |
| 9   | -4 | -8 | 0.54   | 3.66  | 1 |
| 8   | -4 | -8 | 16.39  | 5.67  | 1 |
| -8  | 4  | 8  | 6.71   | 4.65  | 3 |
| -7  | 4  | 8  | 77.19  | 11.35 | 3 |
| 7   | -4 | -8 | 65.82  | 9.28  | 1 |
| 6   | -4 | -8 | 9.57   | 5.13  | 1 |
| -6  | 4  | 8  | 13.76  | 5.89  | 3 |
| 5   | -4 | -8 | 4.43   | 3.74  | 1 |
| -5  | 4  | 8  | 1.30   | 4.59  | 3 |
| 4   | -4 | -8 | 16.34  | 5.54  | 1 |
| 3   | -4 | -8 | 294.91 | 18.22 | 1 |
| 2   | -4 | -8 | 147.89 | 12.46 | 1 |
| 1   | -4 | -8 | 769.90 | 33.02 | 1 |
| 0   | -4 | -8 | 18.43  | 5.90  | 1 |
| -1  | -4 | -8 | -2.13  | 3.35  | 1 |
| -1  | -4 | -8 | 1.67   | 3.96  | 2 |
| -2  | -4 | -8 | 43.98  | 8.22  | 1 |
| -2  | -4 | -8 | 38.03  | 8.65  | 2 |
| -3  | -4 | -8 | 15.49  | 5.87  | 1 |
| -3  | -4 | -8 | 25.48  | 8.48  | 2 |
| -4  | -4 | -8 | 39.37  | 8.12  | 1 |
| -4  | -4 | -8 | 29.95  | 9.57  | 2 |
| -5  | -4 | -8 | 171.61 | 20.19 | 2 |
| -6  | -4 | -8 | 8.54   | 5.85  | 2 |
| -7  | -4 | -8 | -2.23  | 5.47  | 2 |
| -8  | -4 | -8 | 33.24  | 11.46 | 2 |
| -9  | -4 | -8 | 6.86   | 7.44  | 2 |
| -10 | -4 | -8 | 137.23 | 21.96 | 2 |
| -11 | -4 | -8 | 3.65   | 7.94  | 2 |
| -17 | 5  | 8  | -1.38  | 6.89  | 3 |
| -16 | 5  | 8  | 99.34  | 18.65 | 3 |
| -15 | 5  | 8  | 19.78  | 9.89  | 3 |
| -14 | 5  | 8  | 11.91  | 8.55  | 3 |
| -13 | 5  | 8  | 26.32  | 9.39  | 3 |



|     |    |    |        |       |   |
|-----|----|----|--------|-------|---|
| -12 | 5  | 8  | 50.51  | 11.31 | 3 |
| 11  | -5 | -8 | 87.34  | 10.73 | 1 |
| -11 | 5  | 8  | 107.51 | 14.67 | 3 |
| 10  | -5 | -8 | 181.20 | 14.56 | 1 |
| -10 | 5  | 8  | 189.44 | 18.12 | 3 |
| -9  | 5  | 8  | 65.91  | 11.31 | 3 |
| 9   | -5 | -8 | 66.27  | 9.98  | 1 |
| 8   | -5 | -8 | 181.76 | 14.14 | 1 |
| -8  | 5  | 8  | 168.92 | 15.39 | 3 |
| 7   | -5 | -8 | 599.53 | 28.14 | 1 |
| -7  | 5  | 8  | 532.08 | 28.99 | 3 |
| -6  | 5  | 8  | 7.28   | 5.86  | 3 |
| 6   | -5 | -8 | 3.98   | 4.58  | 1 |
| 5   | -5 | -8 | 35.71  | 8.11  | 1 |
| 4   | -5 | -8 | 574.49 | 27.80 | 1 |
| 3   | -5 | -8 | 199.54 | 15.02 | 1 |
| 2   | -5 | -8 | 87.00  | 10.97 | 1 |
| 1   | -5 | -8 | 66.56  | 10.10 | 1 |
| 0   | -5 | -8 | 212.12 | 15.94 | 1 |
| -1  | -5 | -8 | 21.70  | 6.27  | 1 |
| -2  | -5 | -8 | 208.28 | 15.71 | 1 |
| -2  | -5 | -8 | 209.48 | 17.83 | 2 |
| -3  | -5 | -8 | 34.09  | 9.55  | 2 |
| -3  | -5 | -8 | 40.13  | 8.15  | 1 |
| -4  | -5 | -8 | 10.05  | 6.29  | 2 |
| -4  | -5 | -8 | 10.59  | 5.41  | 1 |
| -5  | -5 | -8 | 17.03  | 8.14  | 2 |
| -6  | -5 | -8 | 12.59  | 8.31  | 2 |
| -7  | -5 | -8 | 3.61   | 7.88  | 2 |
| -8  | -5 | -8 | 9.14   | 9.13  | 2 |
| -9  | -5 | -8 | 30.36  | 10.07 | 2 |
| -10 | -5 | -8 | 36.51  | 13.47 | 2 |
| -17 | 6  | 8  | -4.78  | 6.41  | 3 |
| -16 | 6  | 8  | 74.25  | 16.12 | 3 |
| -15 | 6  | 8  | 3.46   | 7.05  | 3 |
| -14 | 6  | 8  | 55.90  | 12.89 | 3 |
| -13 | 6  | 8  | 146.95 | 17.95 | 3 |
| -12 | 6  | 8  | 93.47  | 14.60 | 3 |
| 11  | -6 | -8 | -2.60  | 3.15  | 1 |
| -11 | 6  | 8  | 8.94   | 6.47  | 3 |
| 10  | -6 | -8 | 331.36 | 19.95 | 1 |
| -10 | 6  | 8  | 322.02 | 22.76 | 3 |
| -9  | 6  | 8  | 493.78 | 28.49 | 3 |
| 9   | -6 | -8 | 526.48 | 25.94 | 1 |
| 8   | -6 | -8 | 52.20  | 9.11  | 1 |
| -8  | 6  | 8  | 36.48  | 9.39  | 3 |

|     |    |    |        |       |   |
|-----|----|----|--------|-------|---|
| 7   | -6 | -8 | 30.32  | 7.20  | 1 |
| -7  | 6  | 8  | 25.38  | 7.97  | 3 |
| -6  | 6  | 8  | 348.58 | 23.30 | 3 |
| 6   | -6 | -8 | 373.97 | 21.84 | 1 |
| 5   | -6 | -8 | 97.59  | 12.00 | 1 |
| 4   | -6 | -8 | 369.49 | 21.87 | 1 |
| 3   | -6 | -8 | 73.60  | 10.79 | 1 |
| 2   | -6 | -8 | 10.92  | 5.34  | 1 |
| 1   | -6 | -8 | 6.90   | 4.68  | 1 |
| 0   | -6 | -8 | 130.98 | 13.43 | 1 |
| -1  | -6 | -8 | -1.05  | 3.54  | 1 |
| -2  | -6 | -8 | 27.39  | 7.37  | 1 |
| -3  | -6 | -8 | 266.63 | 18.34 | 1 |
| -3  | -6 | -8 | 266.70 | 21.84 | 2 |
| -4  | -6 | -8 | 240.49 | 17.57 | 1 |
| -4  | -6 | -8 | 229.75 | 22.82 | 2 |
| -5  | -6 | -8 | 24.98  | 9.74  | 2 |
| -6  | -6 | -8 | 3.84   | 7.43  | 2 |
| -7  | -6 | -8 | 15.21  | 9.80  | 2 |
| -8  | -6 | -8 | 53.16  | 13.64 | 2 |
| -9  | -6 | -8 | 83.55  | 17.44 | 2 |
| -10 | -6 | -8 | -10.64 | 7.06  | 2 |
| -17 | 7  | 8  | 26.83  | 11.77 | 3 |
| -16 | 7  | 8  | 2.83   | 7.36  | 3 |
| -15 | 7  | 8  | 66.26  | 14.31 | 3 |
| -14 | 7  | 8  | -1.41  | 6.52  | 3 |
| -13 | 7  | 8  | 306.35 | 24.49 | 3 |
| -12 | 7  | 8  | 46.14  | 11.43 | 3 |
| -11 | 7  | 8  | 5.79   | 6.37  | 3 |
| 11  | -7 | -8 | 0.80   | 4.21  | 1 |
| -10 | 7  | 8  | 166.70 | 17.46 | 3 |
| 10  | -7 | -8 | 151.41 | 14.19 | 1 |
| -9  | 7  | 8  | 120.45 | 15.10 | 3 |
| 9   | -7 | -8 | 118.52 | 13.04 | 1 |
| -8  | 7  | 8  | 37.73  | 9.87  | 3 |
| 8   | -7 | -8 | 28.94  | 7.70  | 1 |
| 7   | -7 | -8 | 26.67  | 7.55  | 1 |
| -7  | 7  | 8  | 46.39  | 10.76 | 3 |
| 6   | -7 | -8 | 258.41 | 18.40 | 1 |
| 5   | -7 | -8 | 52.74  | 9.81  | 1 |
| 4   | -7 | -8 | 35.76  | 8.54  | 1 |
| 3   | -7 | -8 | 72.10  | 11.00 | 1 |
| 2   | -7 | -8 | 172.30 | 14.62 | 1 |
| 1   | -7 | -8 | 92.64  | 12.34 | 1 |
| 0   | -7 | -8 | 391.38 | 23.14 | 1 |
| -1  | -7 | -8 | 3.49   | 4.85  | 1 |

|     |    |    |        |       |   |
|-----|----|----|--------|-------|---|
| -2  | -7 | -8 | 151.21 | 15.30 | 1 |
| -3  | -7 | -8 | 184.36 | 15.88 | 1 |
| -3  | -7 | -8 | 205.26 | 21.50 | 2 |
| -4  | -7 | -8 | 24.46  | 9.24  | 2 |
| -4  | -7 | -8 | 3.52   | 5.19  | 1 |
| -5  | -7 | -8 | 52.55  | 13.38 | 2 |
| -6  | -7 | -8 | 28.09  | 11.29 | 2 |
| -7  | -7 | -8 | 18.77  | 9.48  | 2 |
| -8  | -7 | -8 | 8.77   | 8.75  | 2 |
| -9  | -7 | -8 | 15.31  | 10.63 | 2 |
| -17 | 8  | 8  | 7.97   | 9.31  | 3 |
| -16 | 8  | 8  | 7.02   | 8.44  | 3 |
| -15 | 8  | 8  | 38.49  | 12.35 | 3 |
| -14 | 8  | 8  | -2.37  | 7.46  | 3 |
| -13 | 8  | 8  | 3.62   | 7.29  | 3 |
| -12 | 8  | 8  | 556.67 | 33.38 | 3 |
| 11  | -8 | -8 | 449.92 | 25.01 | 1 |
| -11 | 8  | 8  | 477.03 | 29.24 | 3 |
| -10 | 8  | 8  | 0.34   | 6.30  | 3 |
| 10  | -8 | -8 | 9.22   | 6.32  | 1 |
| -9  | 8  | 8  | 19.20  | 8.49  | 3 |
| 9   | -8 | -8 | 6.79   | 5.67  | 1 |
| 8   | -8 | -8 | 117.99 | 14.17 | 1 |
| -8  | 8  | 8  | 116.04 | 15.98 | 3 |
| -7  | 8  | 8  | 49.12  | 11.20 | 3 |
| 7   | -8 | -8 | 46.13  | 9.89  | 1 |
| 6   | -8 | -8 | 233.90 | 18.39 | 1 |
| 5   | -8 | -8 | 171.25 | 16.65 | 1 |
| 4   | -8 | -8 | 88.70  | 12.57 | 1 |
| 3   | -8 | -8 | 6.34   | 5.04  | 1 |
| 2   | -8 | -8 | 1.05   | 4.42  | 1 |
| 1   | -8 | -8 | 10.22  | 5.15  | 1 |
| 0   | -8 | -8 | 126.35 | 14.75 | 1 |
| -1  | -8 | -8 | 198.15 | 16.70 | 1 |
| -2  | -8 | -8 | 2.05   | 4.40  | 1 |
| -3  | -8 | -8 | 16.85  | 6.87  | 1 |
| -4  | -8 | -8 | 8.80   | 6.45  | 1 |
| -4  | -8 | -8 | 4.95   | 7.41  | 2 |
| -5  | -8 | -8 | 3.30   | 7.40  | 2 |
| -6  | -8 | -8 | 74.07  | 17.20 | 2 |
| -7  | -8 | -8 | 17.73  | 9.97  | 2 |
| -8  | -8 | -8 | 59.37  | 16.00 | 2 |
| -17 | 9  | 8  | 11.90  | 10.32 | 3 |
| -16 | 9  | 8  | 41.50  | 13.07 | 3 |
| -15 | 9  | 8  | 10.18  | 10.38 | 3 |
| -14 | 9  | 8  | 2.72   | 8.67  | 3 |

-13 9 8 -2.56 7.28 3  
-12 9 8 216.40 21.48 3  
11 -9 -8 8.91 7.05 1  
-11 9 8 3.24 7.83 3  
10 -9 -8 53.70 10.74 1  
-10 9 8 25.09 10.31 3  
9 -9 -8 103.07 13.82 1  
-9 9 8 91.36 15.45 3  
-8 9 8 51.53 12.21 3  
8 -9 -8 44.48 10.15 1  
7 -9 -8 7.93 6.89 1  
6 -9 -8 0.90 5.54 1  
5 -9 -8 141.16 15.86 1  
4 -9 -8 37.79 9.35 1  
3 -9 -8 47.33 10.13 1  
2 -9 -8 9.14 5.50 1  
1 -9 -8 34.15 8.88 1  
0 -9 -8 290.37 21.10 1  
-1 -9 -8 159.89 16.98 1  
-2 -9 -8 28.53 8.86 1  
-3 -9 -8 7.84 6.20 1  
-4 -9 -8 98.53 17.96 2  
-4 -9 -8 120.34 15.44 1  
-5 -9 -8 4.17 7.92 2  
-6 -9 -8 5.53 7.64 2  
-7 -9 -8 -10.04 6.42 2  
-16 10 8 34.29 13.02 3  
-15 10 8 55.28 14.74 3  
-14 10 8 270.85 25.91 3  
-13 10 8 48.30 12.97 3  
-12 10 8 35.33 10.98 3  
-11 10 8 -2.74 6.24 3  
11 -10 -8 5.25 6.51 1  
10 -10 -8 21.92 8.57 1  
-10 10 8 16.33 9.29 3  
9 -10 -8 199.18 17.74 1  
-9 10 8 211.68 21.70 3  
8 -10 -8 77.53 12.88 1  
7 -10 -8 42.88 10.05 1  
6 -10 -8 2.24 5.78 1  
5 -10 -8 25.80 9.42 1  
4 -10 -8 10.13 7.25 1  
3 -10 -8 4.82 5.49 1  
2 -10 -8 428.16 26.85 1  
1 -10 -8 244.74 19.82 1  
0 -10 -8 52.52 10.97 1

|     |     |    |        |       |   |
|-----|-----|----|--------|-------|---|
| -1  | -10 | -8 | 5.01   | 5.91  | 1 |
| -2  | -10 | -8 | 153.45 | 17.98 | 1 |
| -3  | -10 | -8 | 91.65  | 14.94 | 1 |
| -4  | -10 | -8 | 96.22  | 18.86 | 2 |
| -4  | -10 | -8 | 105.69 | 15.66 | 1 |
| -5  | -10 | -8 | -0.35  | 6.77  | 2 |
| -6  | -10 | -8 | 0.74   | 7.52  | 2 |
| -7  | -10 | -8 | -1.82  | 7.28  | 2 |
| -16 | 11  | 8  | 8.71   | 10.54 | 3 |
| -15 | 11  | 8  | 7.06   | 9.39  | 3 |
| -14 | 11  | 8  | -0.08  | 9.41  | 3 |
| -13 | 11  | 8  | 55.87  | 14.24 | 3 |
| -12 | 11  | 8  | 41.03  | 13.24 | 3 |
| 11  | -11 | -8 | 237.07 | 19.60 | 1 |
| -11 | 11  | 8  | 246.27 | 24.03 | 3 |
| -10 | 11  | 8  | 41.14  | 12.44 | 3 |
| 10  | -11 | -8 | 59.58  | 11.98 | 1 |
| 9   | -11 | -8 | 5.44   | 6.83  | 1 |
| 8   | -11 | -8 | 149.35 | 17.22 | 1 |
| 7   | -11 | -8 | 203.75 | 19.41 | 1 |
| 6   | -11 | -8 | 73.00  | 13.61 | 1 |
| 5   | -11 | -8 | 87.07  | 14.37 | 1 |
| 4   | -11 | -8 | 17.32  | 8.64  | 1 |
| 3   | -11 | -8 | 6.14   | 5.44  | 1 |
| 2   | -11 | -8 | 215.57 | 19.00 | 1 |
| 1   | -11 | -8 | 3.07   | 5.77  | 1 |
| 0   | -11 | -8 | 251.68 | 21.00 | 1 |
| -1  | -11 | -8 | 24.12  | 9.75  | 1 |
| -2  | -11 | -8 | 158.65 | 18.90 | 1 |
| -3  | -11 | -8 | 0.29   | 7.20  | 1 |
| -4  | -11 | -8 | 29.31  | 10.06 | 1 |
| -5  | -11 | -8 | 0.79   | 7.48  | 2 |
| -6  | -11 | -8 | 1.24   | 7.09  | 2 |
| -14 | 12  | 8  | 0.10   | 9.86  | 3 |
| -13 | 12  | 8  | 7.31   | 10.07 | 3 |
| -12 | 12  | 8  | 16.24  | 11.78 | 3 |
| -11 | 12  | 8  | 165.89 | 21.05 | 3 |
| 11  | -12 | -8 | 136.04 | 16.68 | 1 |
| 10  | -12 | -8 | 7.13   | 7.88  | 1 |
| 9   | -12 | -8 | 5.14   | 7.26  | 1 |
| 8   | -12 | -8 | 154.16 | 18.10 | 1 |
| 7   | -12 | -8 | 29.92  | 10.42 | 1 |
| 6   | -12 | -8 | -2.27  | 6.44  | 1 |
| 5   | -12 | -8 | 0.10   | 6.77  | 1 |
| 4   | -12 | -8 | 537.07 | 32.88 | 1 |
| 3   | -12 | -8 | 81.34  | 14.14 | 1 |

|    |     |    |        |       |   |
|----|-----|----|--------|-------|---|
| 2  | -12 | -8 | 5.48   | 6.61  | 1 |
| 1  | -12 | -8 | 1.82   | 6.02  | 1 |
| 0  | -12 | -8 | 80.16  | 14.17 | 1 |
| -1 | -12 | -8 | 67.27  | 13.23 | 1 |
| -2 | -12 | -8 | 14.05  | 8.17  | 1 |
| -3 | -12 | -8 | 23.82  | 8.77  | 1 |
| -4 | -12 | -8 | -2.66  | 8.03  | 1 |
| -5 | -12 | -8 | 4.20   | 8.44  | 2 |
| 11 | -13 | -8 | 93.25  | 15.49 | 1 |
| 10 | -13 | -8 | 57.87  | 13.53 | 1 |
| 9  | -13 | -8 | 9.03   | 8.96  | 1 |
| 8  | -13 | -8 | 18.01  | 10.00 | 1 |
| 7  | -13 | -8 | 0.94   | 7.92  | 1 |
| 6  | -13 | -8 | -3.33  | 8.00  | 1 |
| 5  | -13 | -8 | 1.67   | 7.96  | 1 |
| 4  | -13 | -8 | 23.25  | 10.78 | 1 |
| 3  | -13 | -8 | 23.43  | 9.17  | 1 |
| 2  | -13 | -8 | 26.88  | 9.31  | 1 |
| 1  | -13 | -8 | -5.45  | 5.64  | 1 |
| 0  | -13 | -8 | 6.98   | 8.20  | 1 |
| -1 | -13 | -8 | 4.45   | 6.81  | 1 |
| -2 | -13 | -8 | 147.79 | 20.04 | 1 |
| -3 | -13 | -8 | 26.43  | 11.52 | 1 |
| 11 | -14 | -8 | 6.12   | 8.42  | 1 |
| 10 | -14 | -8 | 2.35   | 8.59  | 1 |
| 9  | -14 | -8 | -4.02  | 7.60  | 1 |
| 8  | -14 | -8 | 24.93  | 10.65 | 1 |
| 7  | -14 | -8 | 7.39   | 9.17  | 1 |
| 6  | -14 | -8 | 201.39 | 22.66 | 1 |
| 5  | -14 | -8 | 43.47  | 13.10 | 1 |
| 4  | -14 | -8 | 22.75  | 11.17 | 1 |
| 3  | -14 | -8 | 11.76  | 8.18  | 1 |
| 2  | -14 | -8 | 9.02   | 8.44  | 1 |
| 1  | -14 | -8 | 8.15   | 8.55  | 1 |
| 0  | -14 | -8 | -13.90 | 6.84  | 1 |
| -1 | -14 | -8 | 5.91   | 9.26  | 1 |
| -2 | -14 | -8 | 15.70  | 10.10 | 1 |
| 11 | -15 | -8 | 5.48   | 9.08  | 1 |
| 10 | -15 | -8 | 3.57   | 8.89  | 1 |
| 9  | -15 | -8 | 8.30   | 8.93  | 1 |
| 8  | -15 | -8 | -1.11  | 8.20  | 1 |
| 7  | -15 | -8 | 15.32  | 9.70  | 1 |
| 6  | -15 | -8 | 17.97  | 9.87  | 1 |
| 5  | -15 | -8 | 4.47   | 9.02  | 1 |
| 4  | -15 | -8 | 29.61  | 12.01 | 1 |
| 3  | -15 | -8 | -2.59  | 8.03  | 1 |

|    |     |    |        |       |   |
|----|-----|----|--------|-------|---|
| 2  | -15 | -8 | 26.26  | 10.96 | 1 |
| 1  | -15 | -8 | 15.59  | 10.48 | 1 |
| 0  | -15 | -8 | 34.54  | 13.87 | 1 |
| -1 | -15 | -8 | 41.93  | 13.51 | 1 |
| 11 | -16 | -8 | 30.44  | 12.58 | 1 |
| 10 | -16 | -8 | 17.34  | 10.15 | 1 |
| 9  | -16 | -8 | 10.92  | 9.49  | 1 |
| 8  | -16 | -8 | 37.22  | 12.49 | 1 |
| 7  | -16 | -8 | 15.32  | 9.86  | 1 |
| 6  | -16 | -8 | 3.27   | 8.89  | 1 |
| 5  | -16 | -8 | -3.77  | 7.51  | 1 |
| 4  | -16 | -8 | -3.60  | 7.84  | 1 |
| 3  | -16 | -8 | 0.25   | 9.68  | 1 |
| 2  | -16 | -8 | 5.52   | 9.27  | 1 |
| 9  | -17 | -8 | 51.79  | 14.78 | 1 |
| 8  | -17 | -8 | 0.93   | 8.63  | 1 |
| 7  | -17 | -8 | -8.90  | 6.85  | 1 |
| 6  | -17 | -8 | 10.22  | 7.81  | 1 |
| 0  | -20 | 9  | -16.62 | 6.19  | 1 |
| 0  | -20 | 9  | -9.72  | 6.52  | 4 |
| 1  | -20 | 9  | -8.36  | 6.24  | 4 |
| 1  | -20 | 9  | -12.73 | 6.30  | 1 |
| -2 | 20  | -9 | 28.84  | 11.76 | 2 |
| 2  | -20 | 9  | 23.79  | 10.32 | 1 |
| 2  | -20 | 9  | 35.79  | 12.24 | 4 |
| 3  | -20 | 9  | -5.45  | 7.74  | 1 |
| -3 | 20  | -9 | 6.16   | 9.81  | 2 |
| 3  | -20 | 9  | 5.73   | 9.27  | 4 |
| -4 | 20  | -9 | 6.10   | 9.72  | 2 |
| 4  | -20 | 9  | -5.09  | 8.38  | 1 |
| 4  | -20 | 9  | -15.64 | 8.31  | 4 |
| -5 | 20  | -9 | -1.51  | 8.69  | 2 |
| 2  | 19  | -9 | 4.46   | 8.59  | 1 |
| 1  | 19  | -9 | -1.79  | 7.43  | 1 |
| 0  | 19  | -9 | 13.70  | 8.20  | 1 |
| -1 | 19  | -9 | 16.16  | 9.14  | 1 |
| -1 | 19  | -9 | 4.80   | 9.50  | 2 |
| -2 | 19  | -9 | -13.22 | 7.39  | 2 |
| -3 | 19  | -9 | 11.03  | 10.52 | 2 |
| 4  | -19 | 9  | 61.01  | 13.95 | 4 |
| -4 | 19  | -9 | 75.64  | 16.20 | 2 |
| 4  | -19 | 9  | 69.49  | 14.95 | 1 |
| 5  | -19 | 9  | 29.40  | 11.58 | 4 |
| 5  | -19 | 9  | -0.53  | 8.05  | 1 |
| -5 | 19  | -9 | 8.85   | 9.98  | 2 |
| -6 | 19  | -9 | -3.88  | 6.92  | 2 |

|     |    |    |        |       |   |
|-----|----|----|--------|-------|---|
| -7  | 19 | -9 | -2.09  | 6.82  | 2 |
| 5   | 18 | -9 | 4.81   | 6.37  | 1 |
| 4   | 18 | -9 | 1.60   | 6.90  | 1 |
| 3   | 18 | -9 | -6.98  | 5.85  | 1 |
| 2   | 18 | -9 | 8.91   | 7.26  | 1 |
| 1   | 18 | -9 | 48.08  | 11.89 | 1 |
| 0   | 18 | -9 | 10.78  | 6.87  | 1 |
| 0   | 18 | -9 | 9.06   | 9.63  | 2 |
| -1  | 18 | -9 | 13.19  | 9.58  | 2 |
| -1  | 18 | -9 | 4.05   | 5.86  | 1 |
| -2  | 18 | -9 | 52.20  | 14.24 | 2 |
| -2  | 18 | -9 | 53.31  | 11.99 | 1 |
| -3  | 18 | -9 | 41.05  | 11.91 | 2 |
| -3  | 18 | -9 | 73.10  | 13.57 | 1 |
| -4  | 18 | -9 | 5.36   | 8.46  | 2 |
| -4  | 18 | -9 | 7.48   | 6.03  | 1 |
| -5  | 18 | -9 | 9.21   | 8.70  | 2 |
| -6  | 18 | -9 | -6.40  | 6.44  | 2 |
| -7  | 18 | -9 | -1.22  | 7.22  | 2 |
| -8  | 18 | -9 | -0.16  | 7.04  | 2 |
| -9  | 18 | -9 | -4.30  | 6.23  | 2 |
| 6   | 17 | -9 | -6.55  | 6.33  | 1 |
| 5   | 17 | -9 | 5.45   | 7.83  | 1 |
| 4   | 17 | -9 | 31.57  | 10.81 | 1 |
| 3   | 17 | -9 | -1.24  | 7.48  | 1 |
| 2   | 17 | -9 | 42.14  | 11.51 | 1 |
| 1   | 17 | -9 | 6.57   | 5.61  | 1 |
| 0   | 17 | -9 | -3.14  | 4.67  | 1 |
| 0   | 17 | -9 | -13.20 | 7.32  | 2 |
| -1  | 17 | -9 | 5.96   | 6.30  | 1 |
| -1  | 17 | -9 | 16.92  | 10.24 | 2 |
| -2  | 17 | -9 | 38.29  | 11.90 | 2 |
| -2  | 17 | -9 | 34.79  | 9.64  | 1 |
| -3  | 17 | -9 | 195.17 | 20.02 | 1 |
| -3  | 17 | -9 | 220.40 | 23.49 | 2 |
| -4  | 17 | -9 | 19.67  | 7.36  | 1 |
| -4  | 17 | -9 | 17.66  | 9.18  | 2 |
| -5  | 17 | -9 | 2.21   | 7.47  | 2 |
| -5  | 17 | -9 | 10.64  | 6.82  | 1 |
| -6  | 17 | -9 | 13.27  | 9.39  | 2 |
| -7  | 17 | -9 | 7.86   | 8.59  | 2 |
| -8  | 17 | -9 | 0.12   | 7.85  | 2 |
| -9  | 17 | -9 | 1.37   | 6.88  | 2 |
| -10 | 17 | -9 | -11.19 | 5.40  | 2 |
| 8   | 16 | -9 | 50.68  | 14.39 | 1 |
| 7   | 16 | -9 | 15.25  | 9.92  | 1 |



|     |    |    |        |       |   |
|-----|----|----|--------|-------|---|
| 6   | 16 | -9 | 169.30 | 21.61 | 1 |
| 5   | 16 | -9 | 51.42  | 13.60 | 1 |
| 4   | 16 | -9 | 12.94  | 9.15  | 1 |
| 3   | 16 | -9 | 152.49 | 19.42 | 1 |
| 2   | 16 | -9 | 25.36  | 8.90  | 1 |
| 1   | 16 | -9 | 12.89  | 7.45  | 1 |
| 1   | 16 | -9 | 8.40   | 7.51  | 2 |
| 0   | 16 | -9 | 59.11  | 12.35 | 2 |
| 0   | 16 | -9 | 56.81  | 11.66 | 1 |
| -1  | 16 | -9 | 1.24   | 7.47  | 2 |
| -1  | 16 | -9 | -1.76  | 4.42  | 1 |
| -2  | 16 | -9 | 29.59  | 10.17 | 2 |
| -2  | 16 | -9 | 31.40  | 8.08  | 1 |
| -3  | 16 | -9 | 3.45   | 7.96  | 2 |
| -3  | 16 | -9 | 24.02  | 7.61  | 1 |
| -4  | 16 | -9 | 2.55   | 7.51  | 2 |
| -4  | 16 | -9 | -3.76  | 4.04  | 1 |
| -5  | 16 | -9 | 4.76   | 7.56  | 2 |
| -5  | 16 | -9 | -6.57  | 4.20  | 1 |
| -6  | 16 | -9 | 18.96  | 9.54  | 2 |
| -7  | 16 | -9 | 162.68 | 21.79 | 2 |
| -8  | 16 | -9 | 13.46  | 9.39  | 2 |
| -9  | 16 | -9 | -8.99  | 6.80  | 2 |
| -10 | 16 | -9 | -1.07  | 6.22  | 2 |
| 9   | 15 | -9 | -2.97  | 7.80  | 1 |
| 8   | 15 | -9 | 20.49  | 9.61  | 1 |
| 7   | 15 | -9 | 14.15  | 9.84  | 1 |
| 6   | 15 | -9 | 179.41 | 20.81 | 1 |
| 5   | 15 | -9 | 13.27  | 8.75  | 1 |
| 4   | 15 | -9 | 85.36  | 15.69 | 1 |
| 3   | 15 | -9 | 1.24   | 6.75  | 1 |
| 2   | 15 | -9 | 109.87 | 15.45 | 1 |
| 1   | 15 | -9 | 14.54  | 7.90  | 2 |
| 1   | 15 | -9 | 4.71   | 5.33  | 1 |
| 0   | 15 | -9 | 8.02   | 5.76  | 1 |
| 0   | 15 | -9 | 17.09  | 7.96  | 2 |
| -1  | 15 | -9 | 829.06 | 41.29 | 2 |
| -1  | 15 | -9 | 846.39 | 40.36 | 1 |
| -2  | 15 | -9 | 66.44  | 11.40 | 1 |
| -2  | 15 | -9 | 55.07  | 12.47 | 2 |
| -3  | 15 | -9 | 18.81  | 6.33  | 1 |
| -3  | 15 | -9 | 6.65   | 7.18  | 2 |
| -4  | 15 | -9 | 2.12   | 6.43  | 2 |
| -4  | 15 | -9 | -0.39  | 3.70  | 1 |
| -5  | 15 | -9 | 25.73  | 9.96  | 2 |
| -5  | 15 | -9 | 43.99  | 9.62  | 1 |

|     |    |    |        |       |   |
|-----|----|----|--------|-------|---|
| -6  | 15 | -9 | 47.09  | 12.42 | 2 |
| -7  | 15 | -9 | 38.78  | 13.00 | 2 |
| -8  | 15 | -9 | 78.27  | 16.11 | 2 |
| -9  | 15 | -9 | 10.90  | 9.51  | 2 |
| -10 | 15 | -9 | -0.27  | 6.80  | 2 |
| -11 | 15 | -9 | 1.55   | 6.49  | 2 |
| 10  | 14 | -9 | -0.43  | 8.43  | 1 |
| 9   | 14 | -9 | 10.44  | 9.17  | 1 |
| 8   | 14 | -9 | 270.44 | 23.54 | 1 |
| 7   | 14 | -9 | 8.05   | 8.02  | 1 |
| 6   | 14 | -9 | 9.39   | 8.49  | 1 |
| 5   | 14 | -9 | 355.74 | 26.24 | 1 |
| 4   | 14 | -9 | 102.61 | 16.05 | 1 |
| 3   | 14 | -9 | 287.38 | 22.95 | 1 |
| 2   | 14 | -9 | 23.85  | 9.02  | 2 |
| 2   | 14 | -9 | 20.36  | 7.47  | 1 |
| 1   | 14 | -9 | 554.18 | 30.89 | 1 |
| 1   | 14 | -9 | 578.50 | 31.88 | 2 |
| 0   | 14 | -9 | 5.22   | 4.46  | 1 |
| 0   | 14 | -9 | 14.21  | 7.10  | 2 |
| -1  | 14 | -9 | 10.98  | 7.13  | 2 |
| -1  | 14 | -9 | 14.82  | 6.33  | 1 |
| -2  | 14 | -9 | 113.65 | 13.93 | 1 |
| -2  | 14 | -9 | 100.12 | 14.65 | 2 |
| -3  | 14 | -9 | 53.00  | 10.00 | 1 |
| -3  | 14 | -9 | 46.37  | 10.76 | 2 |
| -4  | 14 | -9 | 80.30  | 14.15 | 2 |
| -4  | 14 | -9 | 65.51  | 10.23 | 1 |
| -5  | 14 | -9 | 104.23 | 16.08 | 2 |
| -5  | 14 | -9 | 99.78  | 12.30 | 1 |
| -6  | 14 | -9 | 3.10   | 7.18  | 2 |
| -7  | 14 | -9 | 6.59   | 8.72  | 2 |
| -8  | 14 | -9 | 391.52 | 30.62 | 2 |
| -9  | 14 | -9 | 6.15   | 7.82  | 2 |
| -10 | 14 | -9 | 82.94  | 17.51 | 2 |
| -11 | 14 | -9 | 0.29   | 6.15  | 2 |
| -12 | 14 | -9 | 6.16   | 7.15  | 2 |
| 10  | 13 | -9 | 15.99  | 9.50  | 1 |
| 9   | 13 | -9 | 29.73  | 11.16 | 1 |
| 8   | 13 | -9 | 11.49  | 8.66  | 1 |
| 7   | 13 | -9 | 155.87 | 18.85 | 1 |
| 6   | 13 | -9 | 69.38  | 14.14 | 1 |
| 5   | 13 | -9 | 102.03 | 15.49 | 1 |
| 4   | 13 | -9 | 1.89   | 6.26  | 1 |
| 3   | 13 | -9 | 4.90   | 6.20  | 1 |
| 2   | 13 | -9 | 122.19 | 15.36 | 1 |

|     |    |    |        |       |   |
|-----|----|----|--------|-------|---|
| 2   | 13 | -9 | 115.91 | 14.57 | 2 |
| 1   | 13 | -9 | 311.09 | 21.39 | 2 |
| 1   | 13 | -9 | 291.01 | 21.34 | 1 |
| 0   | 13 | -9 | 8.01   | 5.80  | 2 |
| 0   | 13 | -9 | -0.39  | 3.45  | 1 |
| -1  | 13 | -9 | -3.36  | 5.15  | 2 |
| -1  | 13 | -9 | 0.56   | 3.41  | 1 |
| -2  | 13 | -9 | -2.58  | 5.56  | 2 |
| -2  | 13 | -9 | 1.49   | 4.21  | 1 |
| -3  | 13 | -9 | 1.00   | 6.09  | 2 |
| -3  | 13 | -9 | -0.02  | 3.65  | 1 |
| -4  | 13 | -9 | 22.37  | 6.18  | 1 |
| -4  | 13 | -9 | 19.12  | 7.83  | 2 |
| -5  | 13 | -9 | -1.92  | 5.36  | 2 |
| -5  | 13 | -9 | 0.19   | 3.62  | 1 |
| -6  | 13 | -9 | 89.41  | 15.85 | 2 |
| -7  | 13 | -9 | 61.50  | 13.89 | 2 |
| -8  | 13 | -9 | 75.38  | 15.67 | 2 |
| -9  | 13 | -9 | 3.14   | 8.35  | 2 |
| -10 | 13 | -9 | 77.27  | 16.84 | 2 |
| -11 | 13 | -9 | 12.83  | 8.21  | 2 |
| -12 | 13 | -9 | 5.71   | 6.87  | 2 |
| 10  | 12 | -9 | 10.91  | 9.07  | 1 |
| 9   | 12 | -9 | 7.38   | 7.94  | 1 |
| 8   | 12 | -9 | 24.43  | 10.23 | 1 |
| 7   | 12 | -9 | 107.04 | 15.86 | 1 |
| 6   | 12 | -9 | 34.05  | 9.96  | 1 |
| 5   | 12 | -9 | 27.04  | 8.89  | 1 |
| 4   | 12 | -9 | 12.80  | 7.62  | 1 |
| 3   | 12 | -9 | 38.96  | 9.64  | 1 |
| 2   | 12 | -9 | 8.71   | 5.13  | 1 |
| 2   | 12 | -9 | 1.30   | 4.42  | 2 |
| 1   | 12 | -9 | 23.83  | 6.95  | 2 |
| 1   | 12 | -9 | 18.85  | 6.11  | 1 |
| 0   | 12 | -9 | 204.63 | 16.22 | 2 |
| 0   | 12 | -9 | 189.68 | 15.88 | 1 |
| -1  | 12 | -9 | 31.94  | 7.29  | 1 |
| -1  | 12 | -9 | 36.53  | 8.61  | 2 |
| -2  | 12 | -9 | 101.55 | 13.55 | 2 |
| -2  | 12 | -9 | 84.26  | 11.40 | 1 |
| -3  | 12 | -9 | 17.18  | 5.37  | 1 |
| -3  | 12 | -9 | 17.20  | 7.22  | 2 |
| -4  | 12 | -9 | 19.45  | 8.23  | 2 |
| -4  | 12 | -9 | 26.74  | 7.02  | 1 |
| -5  | 12 | -9 | 360.55 | 20.59 | 1 |
| -5  | 12 | -9 | 338.55 | 25.01 | 2 |

-6 12 -9 80.34 14.55 2  
-7 12 -9 156.83 20.11 2  
-8 12 -9 8.84 8.58 2  
-9 12 -9 9.34 8.28 2  
-10 12 -9 60.58 14.33 2  
-11 12 -9 29.84 11.63 2  
-12 12 -9 4.13 5.86 2  
10 11 -9 -1.06 7.57 1  
9 11 -9 117.59 16.39 1  
8 11 -9 18.21 8.83 1  
7 11 -9 85.76 13.70 1  
6 11 -9 -3.21 4.92 1  
5 11 -9 12.32 7.25 1  
4 11 -9 382.71 24.35 1  
3 11 -9 4.12 4.66 1  
3 11 -9 3.42 4.22 2  
2 11 -9 57.57 10.33 1  
1 11 -9 204.90 15.19 2  
1 11 -9 175.77 14.73 1  
0 11 -9 25.93 6.87 1  
0 11 -9 20.66 6.66 2  
-1 11 -9 296.35 18.90 1  
-1 11 -9 289.62 18.66 2  
-2 11 -9 16.16 5.67 1  
-2 11 -9 18.60 6.33 2  
-3 11 -9 141.94 12.28 1  
-3 11 -9 135.79 15.34 2  
-4 11 -9 156.32 12.90 1  
-4 11 -9 141.16 16.73 2  
-5 11 -9 123.30 11.95 1  
-5 11 -9 123.16 16.79 2  
-6 11 -9 1.21 5.48 2  
-7 11 -9 93.78 15.71 2  
-8 11 -9 399.54 28.65 2  
-9 11 -9 724.73 42.13 2  
-10 11 -9 12.88 8.73 2  
-11 11 -9 8.25 7.73 2  
-12 11 -9 5.50 6.54 2  
-13 11 -9 13.76 10.04 2  
10 10 -9 4.24 8.04 1  
9 10 -9 27.63 9.08 1  
8 10 -9 21.81 7.88 1  
7 10 -9 75.41 12.79 1  
6 10 -9 23.60 7.94 1  
5 10 -9 9.35 6.47 1  
4 10 -9 1.13 5.29 1

|     |    |    |         |       |   |
|-----|----|----|---------|-------|---|
| 3   | 10 | -9 | 182.76  | 13.57 | 2 |
| 3   | 10 | -9 | 155.21  | 15.58 | 1 |
| 2   | 10 | -9 | 92.43   | 12.00 | 1 |
| 2   | 10 | -9 | 83.80   | 10.22 | 2 |
| 1   | 10 | -9 | 34.77   | 7.62  | 1 |
| 0   | 10 | -9 | 654.91  | 30.50 | 2 |
| 0   | 10 | -9 | 727.42  | 32.32 | 1 |
| -1  | 10 | -9 | 670.66  | 30.87 | 2 |
| -1  | 10 | -9 | 647.97  | 30.33 | 1 |
| -2  | 10 | -9 | 31.31   | 6.93  | 1 |
| -2  | 10 | -9 | 20.16   | 5.63  | 2 |
| -3  | 10 | -9 | 982.24  | 39.72 | 1 |
| -3  | 10 | -9 | 1028.47 | 43.86 | 2 |
| -4  | 10 | -9 | 34.95   | 9.35  | 2 |
| -4  | 10 | -9 | 50.58   | 8.14  | 1 |
| -5  | 10 | -9 | 489.86  | 29.06 | 2 |
| -6  | 10 | -9 | 7.68    | 5.42  | 2 |
| -7  | 10 | -9 | 113.06  | 16.57 | 2 |
| -8  | 10 | -9 | 109.82  | 17.12 | 2 |
| -9  | 10 | -9 | -1.26   | 5.10  | 2 |
| -10 | 10 | -9 | 385.60  | 29.84 | 2 |
| -11 | 10 | -9 | 31.52   | 11.05 | 2 |
| -12 | 10 | -9 | 122.05  | 20.43 | 2 |
| -13 | 10 | -9 | 33.04   | 11.55 | 2 |
| 10  | 9  | -9 | 111.97  | 15.46 | 1 |
| 9   | 9  | -9 | 32.45   | 8.91  | 1 |
| 8   | 9  | -9 | 36.51   | 9.63  | 1 |
| 7   | 9  | -9 | 44.84   | 9.77  | 1 |
| 6   | 9  | -9 | 291.92  | 20.73 | 1 |
| 5   | 9  | -9 | 49.43   | 9.65  | 1 |
| 4   | 9  | -9 | 2.37    | 4.83  | 1 |
| 3   | 9  | -9 | 14.72   | 5.11  | 1 |
| 3   | 9  | -9 | 18.87   | 4.94  | 2 |
| 2   | 9  | -9 | 134.15  | 10.89 | 2 |
| 2   | 9  | -9 | 142.49  | 12.68 | 1 |
| 1   | 9  | -9 | 12.51   | 5.04  | 1 |
| 1   | 9  | -9 | 11.71   | 4.31  | 2 |
| 0   | 9  | -9 | 52.92   | 8.06  | 2 |
| 0   | 9  | -9 | 60.35   | 9.18  | 1 |
| -1  | 9  | -9 | 165.86  | 13.22 | 1 |
| -1  | 9  | -9 | 167.26  | 13.17 | 2 |
| -2  | 9  | -9 | 313.42  | 18.86 | 1 |
| -2  | 9  | -9 | 352.88  | 20.74 | 2 |
| -3  | 9  | -9 | 107.47  | 12.74 | 2 |
| -3  | 9  | -9 | 103.20  | 10.66 | 1 |
| -4  | 9  | -9 | 77.99   | 11.87 | 2 |

|     |    |    |        |       |   |
|-----|----|----|--------|-------|---|
| -4  | 9  | -9 | 77.22  | 9.25  | 1 |
| -5  | 9  | -9 | 13.42  | 6.14  | 2 |
| -6  | 9  | -9 | 49.53  | 10.91 | 2 |
| -7  | 9  | -9 | 50.54  | 11.98 | 2 |
| -8  | 9  | -9 | 23.21  | 9.32  | 2 |
| -9  | 9  | -9 | 32.56  | 10.52 | 2 |
| -10 | 9  | -9 | 34.56  | 10.90 | 2 |
| -11 | 9  | -9 | 1.36   | 6.07  | 2 |
| -12 | 9  | -9 | 6.29   | 6.81  | 2 |
| -13 | 9  | -9 | -0.39  | 6.86  | 2 |
| -14 | -8 | 9  | 54.28  | 15.01 | 3 |
| -13 | -8 | 9  | 34.50  | 11.49 | 3 |
| -12 | -8 | 9  | -6.34  | 7.16  | 3 |
| -11 | -8 | 9  | 140.16 | 17.67 | 3 |
| 11  | 8  | -9 | 143.97 | 16.39 | 1 |
| 10  | 8  | -9 | 74.82  | 12.82 | 1 |
| -10 | -8 | 9  | 52.11  | 11.22 | 3 |
| -9  | -8 | 9  | 53.01  | 10.82 | 3 |
| 9   | 8  | -9 | 44.78  | 10.40 | 1 |
| -8  | -8 | 9  | 7.44   | 5.67  | 3 |
| 8   | 8  | -9 | 5.14   | 5.55  | 1 |
| -7  | -8 | 9  | 2.19   | 4.62  | 3 |
| 7   | 8  | -9 | 6.49   | 5.26  | 1 |
| 6   | 8  | -9 | 10.28  | 6.17  | 1 |
| -6  | -8 | 9  | 6.99   | 4.90  | 3 |
| 5   | 8  | -9 | 306.95 | 20.28 | 1 |
| -5  | -8 | 9  | 327.67 | 17.96 | 3 |
| 4   | 8  | -9 | -2.71  | 3.31  | 1 |
| -4  | -8 | 9  | 5.20   | 3.50  | 3 |
| 3   | 8  | -9 | 4.90   | 3.32  | 2 |
| 3   | 8  | -9 | 0.25   | 2.81  | 1 |
| 2   | 8  | -9 | 5.46   | 2.94  | 2 |
| 2   | 8  | -9 | -1.59  | 2.42  | 1 |
| 1   | 8  | -9 | 651.77 | 27.81 | 2 |
| 1   | 8  | -9 | 702.69 | 30.73 | 1 |
| 0   | 8  | -9 | 399.90 | 21.35 | 1 |
| -1  | 8  | -9 | 318.24 | 18.17 | 1 |
| -1  | 8  | -9 | 296.49 | 17.94 | 2 |
| -2  | 8  | -9 | 24.40  | 6.40  | 2 |
| -2  | 8  | -9 | 33.39  | 6.76  | 1 |
| -3  | 8  | -9 | 21.97  | 6.45  | 2 |
| -3  | 8  | -9 | 22.41  | 5.37  | 1 |
| -4  | 8  | -9 | 4.47   | 4.07  | 2 |
| -4  | 8  | -9 | -1.22  | 2.95  | 1 |
| -5  | 8  | -9 | 67.10  | 11.97 | 2 |
| -6  | 8  | -9 | 73.44  | 12.99 | 2 |

-7 8 -9 8.11 6.37 2  
-8 8 -9 103.07 15.70 2  
-9 8 -9 56.98 12.87 2  
-10 8 -9 61.66 14.03 2  
-11 8 -9 3.71 7.10 2  
-12 8 -9 30.72 10.62 2  
-13 8 -9 40.98 12.85 2  
-15 -7 9 0.00 10.20 3  
-14 -7 9 10.59 10.10 3  
-13 -7 9 48.75 12.96 3  
-12 -7 9 82.26 15.17 3  
11 7 -9 2.02 5.92 1  
-11 -7 9 10.91 7.25 3  
-10 -7 9 199.31 17.75 3  
10 7 -9 204.17 17.62 1  
-9 -7 9 187.84 16.37 3  
9 7 -9 212.35 17.23 1  
-8 -7 9 4.71 4.89 3  
8 7 -9 5.05 5.10 1  
-7 -7 9 167.61 13.91 3  
7 7 -9 195.93 16.19 1  
-6 -7 9 28.14 6.33 3  
6 7 -9 38.73 8.31 1  
5 7 -9 250.00 17.63 1  
-5 -7 9 288.27 16.44 3  
4 7 -9 110.05 12.21 1  
-4 -7 9 133.13 10.49 3  
3 7 -9 364.27 16.99 2  
-3 -7 9 370.17 18.35 3  
3 7 -9 344.99 20.30 1  
2 7 -9 6.87 3.05 2  
2 7 -9 -0.18 2.87 1  
1 7 -9 134.34 10.14 2  
1 7 -9 162.61 12.57 1  
0 7 -9 342.05 19.09 1  
-1 7 -9 3.49 3.09 2  
-1 7 -9 10.23 3.96 1  
-2 7 -9 0.92 3.30 2  
-2 7 -9 2.25 3.26 1  
-3 7 -9 164.09 13.95 2  
-3 7 -9 163.70 11.81 1  
-4 7 -9 102.16 12.95 2  
-4 7 -9 109.52 9.54 1  
-5 7 -9 70.13 11.69 2  
-6 7 -9 14.42 6.79 2  
-7 7 -9 92.58 14.31 2

|     |    |    |        |       |   |
|-----|----|----|--------|-------|---|
| -8  | 7  | -9 | 6.99   | 5.56  | 2 |
| -9  | 7  | -9 | 165.96 | 19.64 | 2 |
| -10 | 7  | -9 | 4.42   | 6.77  | 2 |
| -11 | 7  | -9 | 77.72  | 15.52 | 2 |
| -12 | 7  | -9 | 6.48   | 6.88  | 2 |
| -13 | 7  | -9 | 5.97   | 8.67  | 2 |
| -15 | -6 | 9  | 11.64  | 11.50 | 3 |
| -14 | -6 | 9  | -5.49  | 7.43  | 3 |
| -13 | -6 | 9  | -4.18  | 6.99  | 3 |
| -12 | -6 | 9  | 8.48   | 7.39  | 3 |
| 11  | 6  | -9 | 11.78  | 7.41  | 1 |
| -11 | -6 | 9  | 5.29   | 6.76  | 3 |
| -10 | -6 | 9  | 2.86   | 5.26  | 3 |
| 10  | 6  | -9 | -2.77  | 4.63  | 1 |
| -9  | -6 | 9  | 398.05 | 24.44 | 3 |
| 9   | 6  | -9 | 374.59 | 23.00 | 1 |
| 8   | 6  | -9 | 112.16 | 12.89 | 1 |
| -8  | -6 | 9  | 93.96  | 12.16 | 3 |
| 7   | 6  | -9 | 164.10 | 14.29 | 1 |
| -7  | -6 | 9  | 141.75 | 13.60 | 3 |
| 6   | 6  | -9 | 309.64 | 19.20 | 1 |
| -6  | -6 | 9  | 293.19 | 17.85 | 3 |
| -5  | -6 | 9  | 89.72  | 9.63  | 3 |
| 5   | 6  | -9 | 74.33  | 10.41 | 1 |
| -4  | -6 | 9  | 392.04 | 19.44 | 3 |
| 4   | 6  | -9 | 385.79 | 21.91 | 1 |
| 3   | 6  | -9 | 397.97 | 16.59 | 2 |
| 3   | 6  | -9 | 340.95 | 20.18 | 1 |
| -3  | -6 | 9  | 354.91 | 18.48 | 3 |
| 2   | 6  | -9 | 149.28 | 12.28 | 1 |
| 2   | 6  | -9 | 152.64 | 9.60  | 2 |
| 1   | 6  | -9 | 65.89  | 8.87  | 1 |
| 1   | 6  | -9 | 68.11  | 7.43  | 2 |
| 0   | 6  | -9 | 5.13   | 3.63  | 1 |
| 0   | 6  | -9 | 4.20   | 2.59  | 2 |
| -1  | 6  | -9 | 0.55   | 2.42  | 1 |
| -1  | 6  | -9 | 6.87   | 3.79  | 2 |
| -2  | 6  | -9 | 13.87  | 4.50  | 1 |
| -2  | 6  | -9 | 17.93  | 5.39  | 2 |
| -3  | 6  | -9 | -0.62  | 2.65  | 1 |
| -3  | 6  | -9 | 1.20   | 3.86  | 2 |
| -4  | 6  | -9 | 86.68  | 11.85 | 2 |
| -4  | 6  | -9 | 115.39 | 9.26  | 1 |
| -5  | 6  | -9 | 25.50  | 7.31  | 2 |
| -6  | 6  | -9 | 60.76  | 11.40 | 2 |
| -7  | 6  | -9 | 3.23   | 4.56  | 2 |



-8 6 -9 32.93 8.94 2  
-9 6 -9 30.52 9.53 2  
-10 6 -9 78.47 14.73 2  
-11 6 -9 157.05 20.26 2  
-12 6 -9 33.18 10.35 2  
-13 6 -9 14.57 8.52 2  
-16 -5 9 -6.11 9.09 3  
-15 -5 9 105.20 19.51 3  
-14 -5 9 37.07 12.25 3  
-13 -5 9 23.36 10.56 3  
-12 -5 9 10.03 7.16 3  
11 5 -9 59.03 10.56 1  
-11 -5 9 50.67 11.38 3  
10 5 -9 221.63 17.21 1  
-10 -5 9 199.40 17.53 3  
-9 -5 9 61.25 11.47 3  
9 5 -9 37.41 7.99 1  
8 5 -9 1.19 3.55 1  
-8 -5 9 2.81 4.37 3  
-7 -5 9 4.18 4.19 3  
7 5 -9 6.07 4.49 1  
-6 -5 9 40.72 7.60 3  
6 5 -9 37.94 8.06 1  
-5 -5 9 269.07 16.18 3  
5 5 -9 262.96 17.38 1  
-4 -5 9 57.49 7.79 3  
4 5 -9 56.01 8.70 1  
3 5 -9 89.08 6.46 2  
-3 -5 9 102.82 9.84 3  
3 5 -9 77.69 9.91 1  
2 5 -9 478.40 19.41 2  
2 5 -9 472.16 23.39 1  
1 5 -9 83.51 7.34 2  
1 5 -9 99.46 10.09 1  
0 5 -9 323.87 18.04 1  
0 5 -9 362.36 17.90 2  
-1 5 -9 28.68 6.02 1  
-1 5 -9 16.73 5.18 2  
-2 5 -9 108.60 11.36 2  
-2 5 -9 121.77 10.02 1  
-3 5 -9 294.94 15.55 1  
-3 5 -9 248.15 17.34 2  
-4 5 -9 -0.79 2.52 1  
-4 5 -9 -4.26 2.91 2  
-5 5 -9 10.47 5.56 2  
-6 5 -9 213.97 18.10 2

-7 5 -9 -0.38 4.64 2  
-8 5 -9 -0.14 5.21 2  
-9 5 -9 149.07 18.96 2  
-10 5 -9 119.48 18.17 2  
-11 5 -9 18.69 8.65 2  
-12 5 -9 14.15 8.60 2  
-13 5 -9 3.03 6.23 2  
-16 -4 9 -4.53 8.28 3  
-15 -4 9 17.95 10.40 3  
-14 -4 9 1.51 6.45 3  
-13 -4 9 17.92 9.01 3  
-12 -4 9 64.20 12.79 3  
-11 -4 9 207.82 18.52 3  
11 4 -9 180.58 15.49 1  
10 4 -9 43.73 8.86 1  
-10 -4 9 62.97 11.77 3  
9 4 -9 -0.49 3.69 1  
-9 -4 9 0.92 4.41 3  
8 4 -9 2.34 3.82 1  
-8 -4 9 3.42 3.89 3  
-7 -4 9 6.21 4.27 3  
7 4 -9 1.21 4.40 1  
6 4 -9 580.76 27.64 1  
-6 -4 9 553.06 26.62 3  
-5 -4 9 0.92 3.12 3  
5 4 -9 -0.06 3.37 1  
-4 -4 9 617.39 27.06 3  
4 4 -9 598.20 27.97 1  
3 4 -9 92.58 6.14 2  
-3 -4 9 101.58 10.17 3  
3 4 -9 99.91 10.49 1  
2 4 -9 22.74 5.56 1  
2 4 -9 17.59 3.45 2  
1 4 -9 46.42 7.30 1  
1 4 -9 61.01 6.94 2  
0 4 -9 82.93 9.05 1  
0 4 -9 76.73 8.36 2  
-1 4 -9 722.94 30.08 2  
-1 4 -9 668.01 28.43 1  
-2 4 -9 124.78 9.92 1  
-2 4 -9 126.27 12.05 2  
-3 4 -9 11.96 5.07 2  
-3 4 -9 18.28 4.77 1  
-4 4 -9 100.59 8.74 1  
-4 4 -9 104.15 12.24 2  
-5 4 -9 0.90 3.76 2

|     |    |    |         |       |   |
|-----|----|----|---------|-------|---|
| -6  | 4  | -9 | 205.69  | 17.08 | 2 |
| -7  | 4  | -9 | 451.96  | 27.49 | 2 |
| -8  | 4  | -9 | 21.63   | 8.01  | 2 |
| -9  | 4  | -9 | -6.65   | 4.81  | 2 |
| -10 | 4  | -9 | 33.00   | 10.65 | 2 |
| -11 | 4  | -9 | -1.98   | 4.86  | 2 |
| -12 | 4  | -9 | 27.18   | 9.37  | 2 |
| -13 | 4  | -9 | -1.31   | 5.54  | 2 |
| -16 | -3 | 9  | 10.33   | 10.00 | 3 |
| -15 | -3 | 9  | 36.83   | 11.34 | 3 |
| -14 | -3 | 9  | 11.39   | 7.78  | 3 |
| -13 | -3 | 9  | 8.54    | 8.04  | 3 |
| -12 | -3 | 9  | 275.00  | 22.24 | 3 |
| 11  | 3  | -9 | -0.63   | 3.40  | 1 |
| -11 | -3 | 9  | 0.46    | 6.12  | 3 |
| 10  | 3  | -9 | 111.78  | 12.54 | 1 |
| -10 | -3 | 9  | 121.85  | 15.03 | 3 |
| 9   | 3  | -9 | 93.60   | 11.25 | 1 |
| -9  | -3 | 9  | 118.57  | 13.66 | 3 |
| -8  | -3 | 9  | 769.20  | 35.25 | 3 |
| 8   | 3  | -9 | 775.17  | 34.14 | 1 |
| 7   | 3  | -9 | 24.83   | 6.39  | 1 |
| -7  | -3 | 9  | 13.23   | 5.04  | 3 |
| -6  | -3 | 9  | 33.95   | 7.31  | 3 |
| 6   | 3  | -9 | 40.86   | 8.05  | 1 |
| -5  | -3 | 9  | 1162.13 | 44.17 | 3 |
| 5   | 3  | -9 | 1181.02 | 44.44 | 1 |
| 4   | 3  | -9 | 649.04  | 29.60 | 1 |
| -4  | -3 | 9  | 733.58  | 30.31 | 3 |
| -3  | -3 | 9  | 91.81   | 9.89  | 3 |
| 3   | 3  | -9 | 62.69   | 4.77  | 2 |
| 3   | 3  | -9 | 68.85   | 8.84  | 1 |
| 2   | 3  | -9 | 286.60  | 13.31 | 2 |
| 2   | 3  | -9 | 304.11  | 17.04 | 1 |
| 1   | 3  | -9 | 360.57  | 19.07 | 1 |
| 1   | 3  | -9 | 386.75  | 17.81 | 2 |
| 0   | 3  | -9 | 66.86   | 8.00  | 1 |
| 0   | 3  | -9 | 48.94   | 7.01  | 2 |
| -1  | 3  | -9 | 1333.88 | 47.79 | 1 |
| -1  | 3  | -9 | 1438.14 | 49.55 | 2 |
| -2  | 3  | -9 | 4.73    | 3.08  | 1 |
| -2  | 3  | -9 | -0.05   | 2.97  | 2 |
| -3  | 3  | -9 | 362.02  | 17.81 | 1 |
| -3  | 3  | -9 | 336.55  | 20.13 | 2 |
| -4  | 3  | -9 | 282.25  | 18.96 | 2 |
| -4  | 3  | -9 | 295.78  | 15.65 | 1 |

-5 3 -9 172.58 15.14 2  
-6 3 -9 58.76 11.16 2  
-7 3 -9 3.37 5.65 2  
-8 3 -9 671.35 36.86 2  
-9 3 -9 109.67 17.26 2  
-10 3 -9 8.50 8.09 2  
-11 3 -9 5.06 5.47 2  
-12 3 -9 -13.89 4.59 2  
-13 3 -9 10.00 9.65 2  
-17 -2 9 104.56 20.12 3  
-16 -2 9 61.74 16.26 3  
-15 -2 9 1.65 7.09 3  
-14 -2 9 410.34 29.85 3  
-13 -2 9 54.78 12.64 3  
-12 -2 9 -2.66 4.99 3  
-11 -2 9 120.27 15.83 3  
10 2 -9 60.75 9.59 1  
-10 -2 9 46.87 10.15 3  
-9 -2 9 217.24 17.31 3  
9 2 -9 207.54 15.62 1  
8 2 -9 649.31 29.39 1  
-8 -2 9 542.17 28.60 3  
-7 -2 9 10.33 5.03 3  
7 2 -9 4.57 4.13 1  
-6 -2 9 4.83 4.15 3  
6 2 -9 0.66 3.68 1  
-5 -2 9 742.67 31.28 3  
5 2 -9 646.25 29.60 1  
4 2 -9 6.14 3.75 1  
-4 -2 9 14.72 4.88 3  
3 2 -9 573.72 25.47 1  
3 2 -9 536.76 19.40 2  
-3 -2 9 525.74 25.68 3  
2 2 -9 40.56 7.06 1  
2 2 -9 46.27 5.38 2  
1 2 -9 952.97 37.08 1  
1 2 -9 1024.70 35.79 2  
0 2 -9 34.43 6.19 1  
0 2 -9 18.73 4.51 2  
-1 2 -9 11.96 4.42 2  
-1 2 -9 4.86 3.12 1  
-2 2 -9 1073.23 39.36 1  
-2 2 -9 1101.94 41.94 2  
-3 2 -9 -1.47 2.30 1  
-3 2 -9 -1.94 2.94 2  
-4 2 -9 685.25 27.20 1

|     |    |    |        |       |   |
|-----|----|----|--------|-------|---|
| -4  | 2  | -9 | 639.51 | 31.10 | 2 |
| -5  | 2  | -9 | 7.40   | 5.27  | 2 |
| -6  | 2  | -9 | 1.01   | 4.75  | 2 |
| -7  | 2  | -9 | 204.93 | 20.04 | 2 |
| -8  | 2  | -9 | 144.98 | 18.42 | 2 |
| -9  | 2  | -9 | 28.07  | 10.13 | 2 |
| -10 | 2  | -9 | -5.92  | 5.67  | 2 |
| -11 | 2  | -9 | 3.28   | 6.35  | 2 |
| -12 | 2  | -9 | 36.10  | 12.23 | 2 |
| -17 | -1 | 9  | -1.18  | 9.17  | 3 |
| -16 | -1 | 9  | 85.77  | 17.58 | 3 |
| -15 | -1 | 9  | -6.78  | 6.27  | 3 |
| -14 | -1 | 9  | 70.37  | 14.42 | 3 |
| -13 | -1 | 9  | 51.17  | 12.64 | 3 |
| -12 | -1 | 9  | 233.50 | 20.62 | 3 |
| 11  | 1  | -9 | 1.53   | 3.66  | 1 |
| -11 | -1 | 9  | 3.02   | 5.38  | 3 |
| 10  | 1  | -9 | 380.06 | 21.66 | 1 |
| -10 | -1 | 9  | 338.23 | 23.15 | 3 |
| -9  | -1 | 9  | 16.13  | 6.31  | 3 |
| 9   | 1  | -9 | 13.64  | 5.69  | 1 |
| -8  | -1 | 9  | 28.33  | 6.88  | 3 |
| 8   | 1  | -9 | 31.20  | 7.35  | 1 |
| -7  | -1 | 9  | 817.34 | 35.19 | 3 |
| 7   | 1  | -9 | 727.17 | 32.50 | 1 |
| 6   | 1  | -9 | 167.33 | 13.21 | 1 |
| -6  | -1 | 9  | 155.07 | 13.00 | 3 |
| -5  | -1 | 9  | 136.87 | 11.74 | 3 |
| 5   | 1  | -9 | 109.23 | 11.25 | 1 |
| -4  | -1 | 9  | 13.44  | 5.28  | 3 |
| 4   | 1  | -9 | 8.13   | 4.11  | 1 |
| 3   | 1  | -9 | 320.65 | 18.19 | 1 |
| 3   | 1  | -9 | 346.29 | 14.21 | 2 |
| 2   | 1  | -9 | 774.56 | 27.84 | 2 |
| 2   | 1  | -9 | 755.45 | 30.97 | 1 |
| 1   | 1  | -9 | 126.65 | 9.11  | 2 |
| 1   | 1  | -9 | 120.36 | 10.20 | 1 |
| -1  | 1  | -9 | 41.42  | 7.04  | 2 |
| -1  | 1  | -9 | 45.15  | 6.77  | 1 |
| -2  | 1  | -9 | 57.53  | 8.63  | 2 |
| -2  | 1  | -9 | 37.08  | 6.28  | 1 |
| -3  | 1  | -9 | 4.95   | 2.95  | 1 |
| -3  | 1  | -9 | 10.31  | 5.05  | 2 |
| -4  | 1  | -9 | 45.94  | 9.29  | 2 |
| -4  | 1  | -9 | 39.30  | 6.42  | 1 |
| -5  | 1  | -9 | 571.58 | 30.45 | 2 |

|     |   |    |        |       |   |
|-----|---|----|--------|-------|---|
| -6  | 1 | -9 | 315.19 | 22.52 | 2 |
| -7  | 1 | -9 | 16.98  | 7.78  | 2 |
| -8  | 1 | -9 | 16.58  | 7.83  | 2 |
| -9  | 1 | -9 | 5.19   | 7.47  | 2 |
| -10 | 1 | -9 | 17.24  | 9.54  | 2 |
| -11 | 1 | -9 | 159.44 | 22.70 | 2 |
| -12 | 1 | -9 | -3.51  | 7.82  | 2 |
| -17 | 0 | 9  | 12.50  | 11.45 | 3 |
| -16 | 0 | 9  | 118.42 | 20.41 | 3 |
| -15 | 0 | 9  | 4.25   | 7.82  | 3 |
| -14 | 0 | 9  | 15.59  | 9.04  | 3 |
| -13 | 0 | 9  | 164.39 | 19.65 | 3 |
| -12 | 0 | 9  | 48.02  | 11.10 | 3 |
| -11 | 0 | 9  | 206.93 | 18.40 | 3 |
| 10  | 0 | -9 | 287.83 | 18.47 | 1 |
| -10 | 0 | 9  | 293.60 | 21.01 | 3 |
| 9   | 0 | -9 | 18.22  | 6.12  | 1 |
| -9  | 0 | 9  | 11.70  | 5.28  | 3 |
| 8   | 0 | -9 | 72.62  | 10.06 | 1 |
| -8  | 0 | 9  | 79.42  | 10.96 | 3 |
| -7  | 0 | 9  | 19.68  | 6.11  | 3 |
| 7   | 0 | -9 | 22.90  | 5.85  | 1 |
| -6  | 0 | 9  | 77.99  | 10.36 | 3 |
| 6   | 0 | -9 | 75.73  | 9.75  | 1 |
| -5  | 0 | 9  | 3.93   | 3.90  | 3 |
| 5   | 0 | -9 | -0.24  | 2.94  | 1 |
| 4   | 0 | -9 | 713.84 | 31.20 | 1 |
| -4  | 0 | 9  | 788.61 | 34.26 | 3 |
| 4   | 0 | -9 | 760.56 | 25.07 | 2 |
| 3   | 0 | -9 | 565.16 | 20.87 | 2 |
| 3   | 0 | -9 | 532.83 | 24.87 | 1 |
| 2   | 0 | -9 | 373.21 | 19.81 | 1 |
| 2   | 0 | -9 | 422.71 | 17.91 | 2 |
| 1   | 0 | -9 | 93.24  | 9.72  | 1 |
| 1   | 0 | -9 | 88.03  | 8.05  | 2 |
| 0   | 0 | -9 | 182.53 | 12.17 | 2 |
| -1  | 0 | -9 | 16.87  | 5.07  | 2 |
| -1  | 0 | -9 | 15.30  | 4.60  | 1 |
| -2  | 0 | -9 | 461.82 | 22.23 | 1 |
| -2  | 0 | -9 | 516.03 | 25.26 | 2 |
| -3  | 0 | -9 | 0.75   | 3.89  | 2 |
| -3  | 0 | -9 | 3.73   | 3.43  | 1 |
| -4  | 0 | -9 | 12.34  | 5.68  | 2 |
| -4  | 0 | -9 | 23.45  | 5.59  | 1 |
| -5  | 0 | -9 | 191.72 | 16.79 | 2 |
| -6  | 0 | -9 | -2.48  | 3.62  | 2 |

|     |    |    |        |       |   |
|-----|----|----|--------|-------|---|
| -7  | 0  | -9 | 129.84 | 17.26 | 2 |
| -8  | 0  | -9 | 156.97 | 20.01 | 2 |
| -9  | 0  | -9 | 124.15 | 19.69 | 2 |
| -10 | 0  | -9 | 27.30  | 11.31 | 2 |
| -11 | 0  | -9 | -2.53  | 6.52  | 2 |
| -12 | 0  | -9 | 114.95 | 20.53 | 2 |
| -17 | 1  | 9  | 9.78   | 10.59 | 3 |
| -16 | 1  | 9  | 9.80   | 9.51  | 3 |
| -15 | 1  | 9  | 78.76  | 16.31 | 3 |
| -14 | 1  | 9  | -2.30  | 6.24  | 3 |
| -13 | 1  | 9  | 18.50  | 7.99  | 3 |
| -12 | 1  | 9  | 40.00  | 10.25 | 3 |
| -11 | 1  | 9  | 48.96  | 10.53 | 3 |
| -10 | 1  | 9  | 399.97 | 25.03 | 3 |
| 10  | -1 | -9 | 420.95 | 22.80 | 1 |
| 9   | -1 | -9 | 498.00 | 25.37 | 1 |
| -9  | 1  | 9  | 515.80 | 28.06 | 3 |
| 8   | -1 | -9 | 8.70   | 5.11  | 1 |
| -8  | 1  | 9  | 8.74   | 5.20  | 3 |
| -7  | 1  | 9  | 26.31  | 7.27  | 3 |
| 7   | -1 | -9 | 11.84  | 4.70  | 1 |
| 6   | -1 | -9 | 82.64  | 10.03 | 1 |
| -6  | 1  | 9  | 62.05  | 9.70  | 3 |
| 5   | -1 | -9 | 47.13  | 7.89  | 1 |
| -5  | 1  | 9  | 28.47  | 6.83  | 3 |
| -4  | 1  | 9  | 787.00 | 35.91 | 3 |
| 4   | -1 | -9 | 852.79 | 28.24 | 2 |
| 4   | -1 | -9 | 797.45 | 33.78 | 1 |
| 3   | -1 | -9 | 2.18   | 3.04  | 1 |
| 3   | -1 | -9 | 5.37   | 2.70  | 2 |
| 2   | -1 | -9 | 274.54 | 14.54 | 2 |
| 2   | -1 | -9 | 257.47 | 16.10 | 1 |
| 1   | -1 | -9 | 608.65 | 26.01 | 1 |
| 1   | -1 | -9 | 500.42 | 23.63 | 2 |
| 0   | -1 | -9 | 833.12 | 33.24 | 2 |
| 0   | -1 | -9 | 774.11 | 32.31 | 1 |
| -1  | -1 | -9 | 9.11   | 4.47  | 2 |
| -1  | -1 | -9 | 9.42   | 4.24  | 1 |
| -2  | -1 | -9 | 4.40   | 3.91  | 2 |
| -2  | -1 | -9 | -2.13  | 2.68  | 1 |
| -3  | -1 | -9 | 504.32 | 26.78 | 2 |
| -3  | -1 | -9 | 465.41 | 22.68 | 1 |
| -4  | -1 | -9 | 39.02  | 9.13  | 2 |
| -4  | -1 | -9 | 19.75  | 5.64  | 1 |
| -5  | -1 | -9 | 6.96   | 5.67  | 2 |
| -6  | -1 | -9 | 19.72  | 8.43  | 2 |

|     |    |    |         |       |   |
|-----|----|----|---------|-------|---|
| -7  | -1 | -9 | 146.88  | 18.73 | 2 |
| -8  | -1 | -9 | 4.04    | 6.64  | 2 |
| -9  | -1 | -9 | 61.65   | 15.59 | 2 |
| -10 | -1 | -9 | -1.85   | 6.94  | 2 |
| -11 | -1 | -9 | 11.69   | 8.54  | 2 |
| -17 | 2  | 9  | 2.57    | 7.36  | 3 |
| -16 | 2  | 9  | 54.33   | 14.03 | 3 |
| -15 | 2  | 9  | 34.21   | 11.81 | 3 |
| -14 | 2  | 9  | -3.50   | 6.76  | 3 |
| -13 | 2  | 9  | 18.89   | 9.32  | 3 |
| -12 | 2  | 9  | 69.64   | 13.06 | 3 |
| -11 | 2  | 9  | 118.32  | 14.95 | 3 |
| 10  | -2 | -9 | 325.37  | 19.28 | 1 |
| -10 | 2  | 9  | 253.07  | 19.83 | 3 |
| 9   | -2 | -9 | 64.99   | 9.62  | 1 |
| -9  | 2  | 9  | 56.63   | 10.83 | 3 |
| 8   | -2 | -9 | 260.09  | 17.20 | 1 |
| -8  | 2  | 9  | 270.99  | 18.85 | 3 |
| 7   | -2 | -9 | 4.00    | 4.07  | 1 |
| -7  | 2  | 9  | 7.18    | 4.28  | 3 |
| -6  | 2  | 9  | 594.98  | 29.00 | 3 |
| 6   | -2 | -9 | 514.64  | 26.05 | 1 |
| 5   | -2 | -9 | 19.38   | 5.81  | 1 |
| -5  | 2  | 9  | 14.74   | 5.49  | 3 |
| 4   | -2 | -9 | 112.75  | 11.75 | 1 |
| 3   | -2 | -9 | 1780.20 | 61.12 | 1 |
| 2   | -2 | -9 | 203.18  | 14.48 | 1 |
| 2   | -2 | -9 | 247.73  | 14.14 | 2 |
| 1   | -2 | -9 | 289.61  | 17.51 | 1 |
| 0   | -2 | -9 | 3.26    | 3.50  | 2 |
| 0   | -2 | -9 | 14.16   | 4.81  | 1 |
| -1  | -2 | -9 | 22.75   | 5.76  | 1 |
| -1  | -2 | -9 | 32.52   | 7.66  | 2 |
| -2  | -2 | -9 | -5.25   | 2.64  | 1 |
| -2  | -2 | -9 | 2.64    | 3.85  | 2 |
| -3  | -2 | -9 | 19.07   | 5.99  | 1 |
| -3  | -2 | -9 | 30.01   | 8.05  | 2 |
| -4  | -2 | -9 | 69.10   | 9.43  | 1 |
| -4  | -2 | -9 | 69.30   | 12.33 | 2 |
| -5  | -2 | -9 | 101.42  | 15.11 | 2 |
| -6  | -2 | -9 | 47.60   | 11.50 | 2 |
| -7  | -2 | -9 | 322.22  | 26.04 | 2 |
| -8  | -2 | -9 | 21.13   | 9.88  | 2 |
| -9  | -2 | -9 | 94.29   | 17.83 | 2 |
| -10 | -2 | -9 | 153.00  | 22.31 | 2 |
| -11 | -2 | -9 | 57.12   | 15.17 | 2 |



|     |    |    |        |       |   |
|-----|----|----|--------|-------|---|
| -17 | 3  | 9  | -1.39  | 6.77  | 3 |
| -16 | 3  | 9  | -4.71  | 5.59  | 3 |
| -15 | 3  | 9  | -0.72  | 7.24  | 3 |
| -14 | 3  | 9  | 37.83  | 12.31 | 3 |
| -13 | 3  | 9  | 322.75 | 25.31 | 3 |
| -12 | 3  | 9  | 840.99 | 42.04 | 3 |
| -11 | 3  | 9  | 188.62 | 18.44 | 3 |
| 10  | -3 | -9 | 4.96   | 4.30  | 1 |
| -10 | 3  | 9  | 0.11   | 5.46  | 3 |
| 9   | -3 | -9 | 348.53 | 20.21 | 1 |
| -9  | 3  | 9  | 272.39 | 20.12 | 3 |
| -8  | 3  | 9  | -3.50  | 3.19  | 3 |
| 8   | -3 | -9 | -0.66  | 3.39  | 1 |
| 7   | -3 | -9 | -4.77  | 3.13  | 1 |
| -7  | 3  | 9  | -4.46  | 3.42  | 3 |
| 6   | -3 | -9 | 51.77  | 8.95  | 1 |
| -6  | 3  | 9  | 57.64  | 10.60 | 3 |
| 5   | -3 | -9 | 159.90 | 13.34 | 1 |
| -5  | 3  | 9  | 183.75 | 15.98 | 3 |
| 4   | -3 | -9 | 44.54  | 8.00  | 1 |
| 3   | -3 | -9 | 187.88 | 14.36 | 1 |
| 2   | -3 | -9 | 55.03  | 8.83  | 1 |
| 1   | -3 | -9 | 107.89 | 11.48 | 2 |
| 1   | -3 | -9 | 104.57 | 11.44 | 1 |
| 0   | -3 | -9 | 168.65 | 13.62 | 2 |
| 0   | -3 | -9 | 159.23 | 12.95 | 1 |
| -1  | -3 | -9 | 422.44 | 22.75 | 1 |
| -1  | -3 | -9 | 456.59 | 24.95 | 2 |
| -2  | -3 | -9 | -0.25  | 3.79  | 2 |
| -2  | -3 | -9 | 0.80   | 4.01  | 1 |
| -3  | -3 | -9 | 5.72   | 4.36  | 1 |
| -3  | -3 | -9 | 6.66   | 5.75  | 2 |
| -4  | -3 | -9 | 12.13  | 5.94  | 1 |
| -4  | -3 | -9 | 7.96   | 6.01  | 2 |
| -5  | -3 | -9 | 72.65  | 14.58 | 2 |
| -6  | -3 | -9 | 149.81 | 19.27 | 2 |
| -7  | -3 | -9 | 5.97   | 6.80  | 2 |
| -8  | -3 | -9 | 24.54  | 11.26 | 2 |
| -9  | -3 | -9 | 4.01   | 7.81  | 2 |
| -10 | -3 | -9 | 4.27   | 7.06  | 2 |
| -17 | 4  | 9  | -0.15  | 7.39  | 3 |
| -16 | 4  | 9  | 13.31  | 8.96  | 3 |
| -15 | 4  | 9  | -4.07  | 7.16  | 3 |
| -14 | 4  | 9  | 5.39   | 7.50  | 3 |
| -13 | 4  | 9  | 21.93  | 9.07  | 3 |
| -12 | 4  | 9  | 62.80  | 12.76 | 3 |

|     |    |    |        |       |   |
|-----|----|----|--------|-------|---|
| -11 | 4  | 9  | -1.36  | 5.36  | 3 |
| 11  | -4 | -9 | -2.53  | 3.38  | 1 |
| 10  | -4 | -9 | 5.54   | 4.37  | 1 |
| -10 | 4  | 9  | 4.16   | 5.08  | 3 |
| -9  | 4  | 9  | 8.49   | 5.70  | 3 |
| 9   | -4 | -9 | 8.13   | 5.11  | 1 |
| -8  | 4  | 9  | 72.38  | 12.15 | 3 |
| 8   | -4 | -9 | 74.65  | 10.55 | 1 |
| -7  | 4  | 9  | 203.56 | 17.40 | 3 |
| 7   | -4 | -9 | 236.32 | 16.64 | 1 |
| -6  | 4  | 9  | 6.04   | 5.33  | 3 |
| 6   | -4 | -9 | 2.81   | 4.29  | 1 |
| 5   | -4 | -9 | 55.23  | 9.44  | 1 |
| 4   | -4 | -9 | -2.64  | 3.37  | 1 |
| 3   | -4 | -9 | 20.30  | 6.10  | 1 |
| 2   | -4 | -9 | 22.08  | 6.09  | 1 |
| 1   | -4 | -9 | 69.97  | 10.14 | 1 |
| 0   | -4 | -9 | 5.09   | 4.63  | 2 |
| 0   | -4 | -9 | 1.52   | 3.44  | 1 |
| -1  | -4 | -9 | 110.68 | 13.25 | 2 |
| -1  | -4 | -9 | 70.92  | 10.40 | 1 |
| -2  | -4 | -9 | 48.12  | 8.72  | 1 |
| -2  | -4 | -9 | 33.67  | 8.41  | 2 |
| -3  | -4 | -9 | 58.43  | 9.52  | 1 |
| -3  | -4 | -9 | 52.17  | 11.59 | 2 |
| -4  | -4 | -9 | 2.06   | 5.67  | 2 |
| -4  | -4 | -9 | 9.95   | 5.07  | 1 |
| -5  | -4 | -9 | 20.75  | 8.85  | 2 |
| -6  | -4 | -9 | 74.03  | 14.68 | 2 |
| -7  | -4 | -9 | 224.14 | 25.41 | 2 |
| -8  | -4 | -9 | 72.66  | 15.66 | 2 |
| -9  | -4 | -9 | 25.70  | 10.72 | 2 |
| -10 | -4 | -9 | -8.15  | 6.36  | 2 |
| -17 | 5  | 9  | 3.85   | 7.43  | 3 |
| -16 | 5  | 9  | 65.93  | 15.17 | 3 |
| -15 | 5  | 9  | 43.58  | 13.00 | 3 |
| -14 | 5  | 9  | 23.67  | 9.99  | 3 |
| -13 | 5  | 9  | 238.68 | 22.75 | 3 |
| -12 | 5  | 9  | 27.05  | 9.38  | 3 |
| 11  | -5 | -9 | 50.21  | 9.37  | 1 |
| -11 | 5  | 9  | 47.00  | 11.20 | 3 |
| -10 | 5  | 9  | 37.46  | 10.27 | 3 |
| 10  | -5 | -9 | 41.99  | 8.38  | 1 |
| 9   | -5 | -9 | 60.73  | 9.95  | 1 |
| -9  | 5  | 9  | 48.60  | 10.83 | 3 |
| 8   | -5 | -9 | 8.92   | 5.02  | 1 |

|     |    |    |        |       |   |
|-----|----|----|--------|-------|---|
| -8  | 5  | 9  | 4.12   | 6.00  | 3 |
| -7  | 5  | 9  | 2.95   | 5.20  | 3 |
| 7   | -5 | -9 | -3.35  | 3.56  | 1 |
| -6  | 5  | 9  | 92.74  | 13.57 | 3 |
| 6   | -5 | -9 | 86.11  | 11.60 | 1 |
| 5   | -5 | -9 | 1.55   | 3.89  | 1 |
| 4   | -5 | -9 | 2.04   | 3.88  | 1 |
| 3   | -5 | -9 | 804.42 | 35.78 | 1 |
| 2   | -5 | -9 | 373.06 | 21.94 | 1 |
| 1   | -5 | -9 | 72.38  | 10.69 | 1 |
| 0   | -5 | -9 | 124.60 | 13.13 | 1 |
| -1  | -5 | -9 | 16.27  | 6.56  | 2 |
| -1  | -5 | -9 | 20.82  | 6.16  | 1 |
| -2  | -5 | -9 | -2.04  | 3.42  | 1 |
| -2  | -5 | -9 | 0.81   | 4.10  | 2 |
| -3  | -5 | -9 | 150.60 | 14.73 | 1 |
| -3  | -5 | -9 | 158.99 | 18.60 | 2 |
| -4  | -5 | -9 | 10.74  | 5.64  | 1 |
| -4  | -5 | -9 | 4.08   | 6.30  | 2 |
| -5  | -5 | -9 | 17.87  | 9.00  | 2 |
| -6  | -5 | -9 | 48.18  | 13.00 | 2 |
| -7  | -5 | -9 | 53.39  | 14.09 | 2 |
| -8  | -5 | -9 | 9.81   | 8.64  | 2 |
| -9  | -5 | -9 | -6.33  | 6.51  | 2 |
| -17 | 6  | 9  | -0.13  | 7.12  | 3 |
| -16 | 6  | 9  | -2.84  | 7.35  | 3 |
| -15 | 6  | 9  | 20.65  | 9.82  | 3 |
| -14 | 6  | 9  | 105.79 | 17.10 | 3 |
| -13 | 6  | 9  | 3.44   | 6.92  | 3 |
| -12 | 6  | 9  | 5.50   | 6.90  | 3 |
| -11 | 6  | 9  | 2.54   | 6.07  | 3 |
| 11  | -6 | -9 | 16.68  | 6.64  | 1 |
| -10 | 6  | 9  | 192.51 | 19.18 | 3 |
| 10  | -6 | -9 | 209.25 | 16.63 | 1 |
| -9  | 6  | 9  | 194.09 | 19.21 | 3 |
| 9   | -6 | -9 | 218.06 | 16.43 | 1 |
| -8  | 6  | 9  | 20.98  | 8.46  | 3 |
| 8   | -6 | -9 | 25.17  | 7.85  | 1 |
| 7   | -6 | -9 | 2.73   | 4.43  | 1 |
| -7  | 6  | 9  | 8.17   | 7.09  | 3 |
| 6   | -6 | -9 | 47.01  | 9.91  | 1 |
| 5   | -6 | -9 | 19.21  | 6.99  | 1 |
| 4   | -6 | -9 | 33.48  | 8.53  | 1 |
| 3   | -6 | -9 | 9.77   | 4.91  | 1 |
| 2   | -6 | -9 | 40.75  | 8.50  | 1 |
| 1   | -6 | -9 | 81.00  | 11.79 | 1 |

|     |    |    |        |       |   |
|-----|----|----|--------|-------|---|
| 0   | -6 | -9 | 3.59   | 4.27  | 1 |
| -1  | -6 | -9 | 2.51   | 4.40  | 1 |
| -2  | -6 | -9 | 118.64 | 13.71 | 1 |
| -2  | -6 | -9 | 103.22 | 16.48 | 2 |
| -3  | -6 | -9 | 61.24  | 10.94 | 1 |
| -3  | -6 | -9 | 40.07  | 10.56 | 2 |
| -4  | -6 | -9 | 138.04 | 18.99 | 2 |
| -4  | -6 | -9 | 128.29 | 14.80 | 1 |
| -5  | -6 | -9 | 129.65 | 19.77 | 2 |
| -6  | -6 | -9 | 28.21  | 11.53 | 2 |
| -7  | -6 | -9 | -1.35  | 6.54  | 2 |
| -8  | -6 | -9 | 1.48   | 7.40  | 2 |
| -9  | -6 | -9 | 0.58   | 7.79  | 2 |
| -17 | 7  | 9  | -3.04  | 5.73  | 3 |
| -16 | 7  | 9  | 21.80  | 10.33 | 3 |
| -15 | 7  | 9  | 62.92  | 14.80 | 3 |
| -14 | 7  | 9  | 9.58   | 8.03  | 3 |
| -13 | 7  | 9  | 93.53  | 16.06 | 3 |
| -12 | 7  | 9  | -2.38  | 5.56  | 3 |
| 11  | -7 | -9 | 49.51  | 10.16 | 1 |
| -11 | 7  | 9  | 58.99  | 12.27 | 3 |
| 10  | -7 | -9 | 3.01   | 4.29  | 1 |
| -10 | 7  | 9  | 3.57   | 5.97  | 3 |
| 9   | -7 | -9 | -1.84  | 5.05  | 1 |
| -9  | 7  | 9  | 4.88   | 6.76  | 3 |
| 8   | -7 | -9 | 22.65  | 7.30  | 1 |
| -8  | 7  | 9  | 30.05  | 10.01 | 3 |
| -7  | 7  | 9  | 29.84  | 10.06 | 3 |
| 7   | -7 | -9 | 22.70  | 7.90  | 1 |
| 6   | -7 | -9 | 4.50   | 5.42  | 1 |
| 5   | -7 | -9 | 76.93  | 12.16 | 1 |
| 4   | -7 | -9 | 237.11 | 18.69 | 1 |
| 3   | -7 | -9 | 162.61 | 16.27 | 1 |
| 2   | -7 | -9 | 128.86 | 14.66 | 1 |
| 1   | -7 | -9 | 18.08  | 6.62  | 1 |
| 0   | -7 | -9 | 3.10   | 5.13  | 1 |
| -1  | -7 | -9 | 10.44  | 5.52  | 1 |
| -2  | -7 | -9 | 14.72  | 5.93  | 1 |
| -3  | -7 | -9 | 16.91  | 8.04  | 2 |
| -3  | -7 | -9 | 20.96  | 7.21  | 1 |
| -4  | -7 | -9 | 4.61   | 7.28  | 2 |
| -4  | -7 | -9 | 3.78   | 5.69  | 1 |
| -5  | -7 | -9 | 0.55   | 6.80  | 2 |
| -6  | -7 | -9 | 1.08   | 7.81  | 2 |
| -7  | -7 | -9 | 8.17   | 8.31  | 2 |
| -8  | -7 | -9 | -0.63  | 6.29  | 2 |

-17 8 9 125.75 21.32 3  
-16 8 9 5.86 8.26 3  
-15 8 9 17.44 9.56 3  
-14 8 9 35.09 11.66 3  
-13 8 9 -2.70 7.24 3  
-12 8 9 847.05 43.83 3  
-11 8 9 574.49 34.32 3  
11 -8 -9 576.79 29.90 1  
10 -8 -9 37.29 9.98 1  
-10 8 9 20.30 9.37 3  
9 -8 -9 46.57 10.38 1  
-9 8 9 54.62 12.55 3  
8 -8 -9 12.44 6.86 1  
-8 8 9 9.92 7.78 3  
7 -8 -9 23.42 8.28 1  
6 -8 -9 101.79 14.22 1  
5 -8 -9 112.58 14.72 1  
4 -8 -9 297.46 21.71 1  
3 -8 -9 30.99 8.39 1  
2 -8 -9 10.26 5.43 1  
1 -8 -9 -4.69 3.33 1  
0 -8 -9 177.24 17.58 1  
-1 -8 -9 364.15 23.82 1  
-2 -8 -9 1.12 5.97 1  
-3 -8 -9 4.43 7.23 2  
-3 -8 -9 8.63 5.95 1  
-4 -8 -9 20.45 10.72 2  
-4 -8 -9 54.33 11.54 1  
-5 -8 -9 -1.69 6.83 2  
-6 -8 -9 7.65 8.73 2  
-7 -8 -9 -1.67 7.34 2  
-17 9 9 74.24 18.70 3  
-16 9 9 42.18 13.37 3  
-15 9 9 33.66 11.96 3  
-14 9 9 51.96 13.59 3  
-13 9 9 67.58 15.00 3  
-12 9 9 80.73 15.58 3  
11 -9 -9 136.72 15.93 1  
-11 9 9 155.58 19.71 3  
-10 9 9 184.59 20.76 3  
10 -9 -9 190.75 18.20 1  
9 -9 -9 30.28 9.17 1  
-9 9 9 23.00 9.99 3  
8 -9 -9 59.86 12.01 1  
7 -9 -9 27.37 9.20 1  
6 -9 -9 0.71 6.05 1

|     |     |    |        |       |   |
|-----|-----|----|--------|-------|---|
| 5   | -9  | -9 | 515.78 | 29.90 | 1 |
| 4   | -9  | -9 | 17.73  | 8.53  | 1 |
| 3   | -9  | -9 | 3.20   | 4.36  | 1 |
| 2   | -9  | -9 | 38.69  | 10.46 | 1 |
| 1   | -9  | -9 | 67.41  | 11.89 | 1 |
| 0   | -9  | -9 | 16.06  | 7.24  | 1 |
| -1  | -9  | -9 | 8.51   | 6.16  | 1 |
| -2  | -9  | -9 | 117.24 | 15.63 | 1 |
| -3  | -9  | -9 | -0.92  | 5.75  | 1 |
| -3  | -9  | -9 | -2.43  | 7.47  | 2 |
| -4  | -9  | -9 | 17.20  | 9.82  | 2 |
| -4  | -9  | -9 | 36.22  | 9.17  | 1 |
| -5  | -9  | -9 | 44.24  | 13.34 | 2 |
| -6  | -9  | -9 | -0.97  | 7.55  | 2 |
| -7  | -9  | -9 | -1.55  | 7.78  | 2 |
| -16 | 10  | 9  | 85.52  | 17.82 | 3 |
| -15 | 10  | 9  | 21.83  | 11.08 | 3 |
| -14 | 10  | 9  | 354.21 | 29.62 | 3 |
| -13 | 10  | 9  | 55.09  | 15.12 | 3 |
| -12 | 10  | 9  | 12.33  | 9.53  | 3 |
| -11 | 10  | 9  | 320.68 | 26.05 | 3 |
| 11  | -10 | -9 | 276.13 | 21.29 | 1 |
| 10  | -10 | -9 | 22.73  | 8.52  | 1 |
| -10 | 10  | 9  | 21.98  | 10.62 | 3 |
| 9   | -10 | -9 | 3.88   | 6.90  | 1 |
| 8   | -10 | -9 | 8.67   | 6.93  | 1 |
| 7   | -10 | -9 | 301.37 | 22.59 | 1 |
| 6   | -10 | -9 | 3.17   | 6.05  | 1 |
| 5   | -10 | -9 | 52.49  | 12.02 | 1 |
| 4   | -10 | -9 | 17.80  | 8.80  | 1 |
| 3   | -10 | -9 | 1.67   | 5.03  | 1 |
| 2   | -10 | -9 | 131.20 | 16.58 | 1 |
| 1   | -10 | -9 | 147.04 | 17.40 | 1 |
| 0   | -10 | -9 | 71.98  | 13.04 | 1 |
| -1  | -10 | -9 | 9.81   | 7.30  | 1 |
| -2  | -10 | -9 | 229.01 | 20.31 | 1 |
| -3  | -10 | -9 | 14.56  | 7.88  | 1 |
| -4  | -10 | -9 | 13.76  | 10.32 | 2 |
| -5  | -10 | -9 | 1.24   | 8.34  | 2 |
| -6  | -10 | -9 | 3.12   | 6.64  | 2 |
| -16 | 11  | 9  | 58.45  | 15.68 | 3 |
| -15 | 11  | 9  | 7.42   | 9.45  | 3 |
| -14 | 11  | 9  | 7.50   | 8.79  | 3 |
| -13 | 11  | 9  | 210.02 | 24.65 | 3 |
| -12 | 11  | 9  | 90.73  | 18.01 | 3 |
| 11  | -11 | -9 | 44.71  | 11.63 | 1 |

|     |     |    |        |       |   |
|-----|-----|----|--------|-------|---|
| -11 | 11  | 9  | 61.29  | 15.70 | 3 |
| 10  | -11 | -9 | 4.12   | 7.57  | 1 |
| 9   | -11 | -9 | 3.78   | 6.91  | 1 |
| 8   | -11 | -9 | 47.76  | 12.22 | 1 |
| 7   | -11 | -9 | 230.71 | 21.85 | 1 |
| 6   | -11 | -9 | 14.95  | 8.98  | 1 |
| 5   | -11 | -9 | 27.72  | 10.41 | 1 |
| 4   | -11 | -9 | 106.88 | 16.52 | 1 |
| 3   | -11 | -9 | 47.66  | 11.29 | 1 |
| 2   | -11 | -9 | 29.18  | 9.67  | 1 |
| 1   | -11 | -9 | 29.35  | 9.50  | 1 |
| 0   | -11 | -9 | 300.27 | 23.72 | 1 |
| -1  | -11 | -9 | -3.66  | 6.64  | 1 |
| -2  | -11 | -9 | 16.91  | 8.30  | 1 |
| -3  | -11 | -9 | 11.63  | 7.80  | 1 |
| -4  | -11 | -9 | 6.69   | 8.05  | 2 |
| -5  | -11 | -9 | 4.96   | 7.86  | 2 |
| -15 | 12  | 9  | 2.59   | 10.06 | 3 |
| -14 | 12  | 9  | 8.01   | 10.51 | 3 |
| -13 | 12  | 9  | 59.95  | 16.34 | 3 |
| -12 | 12  | 9  | 14.25  | 12.11 | 3 |
| -11 | 12  | 9  | 24.88  | 12.61 | 3 |
| 11  | -12 | -9 | 15.98  | 9.45  | 1 |
| 10  | -12 | -9 | 17.88  | 9.16  | 1 |
| 9   | -12 | -9 | 56.46  | 13.66 | 1 |
| 8   | -12 | -9 | -6.07  | 7.11  | 1 |
| 7   | -12 | -9 | 1.99   | 7.70  | 1 |
| 6   | -12 | -9 | 205.54 | 21.66 | 1 |
| 5   | -12 | -9 | 29.78  | 10.94 | 1 |
| 4   | -12 | -9 | 314.88 | 24.99 | 1 |
| 3   | -12 | -9 | 46.43  | 11.33 | 1 |
| 2   | -12 | -9 | -7.45  | 5.86  | 1 |
| 1   | -12 | -9 | 108.02 | 16.58 | 1 |
| 0   | -12 | -9 | 37.62  | 10.84 | 1 |
| -1  | -12 | -9 | 96.79  | 16.42 | 1 |
| -2  | -12 | -9 | 17.03  | 9.39  | 1 |
| -3  | -12 | -9 | 62.70  | 13.79 | 1 |
| -4  | -12 | -9 | -3.14  | 7.15  | 2 |
| 11  | -13 | -9 | -5.97  | 7.56  | 1 |
| 10  | -13 | -9 | 29.48  | 11.14 | 1 |
| 9   | -13 | -9 | 1.90   | 8.13  | 1 |
| 8   | -13 | -9 | -11.61 | 6.67  | 1 |
| 7   | -13 | -9 | 26.06  | 11.11 | 1 |
| 6   | -13 | -9 | 216.82 | 23.06 | 1 |
| 5   | -13 | -9 | 3.54   | 8.89  | 1 |
| 4   | -13 | -9 | 27.38  | 10.11 | 1 |

|    |     |     |        |       |   |
|----|-----|-----|--------|-------|---|
| 3  | -13 | -9  | 224.31 | 23.44 | 1 |
| 2  | -13 | -9  | 49.87  | 12.38 | 1 |
| 1  | -13 | -9  | 27.35  | 10.52 | 1 |
| 0  | -13 | -9  | -2.10  | 6.31  | 1 |
| -1 | -13 | -9  | 24.84  | 10.47 | 1 |
| -2 | -13 | -9  | 40.47  | 12.99 | 1 |
| 11 | -14 | -9  | 26.14  | 10.70 | 1 |
| 10 | -14 | -9  | -1.23  | 7.83  | 1 |
| 9  | -14 | -9  | 3.86   | 8.19  | 1 |
| 8  | -14 | -9  | 64.92  | 14.77 | 1 |
| 7  | -14 | -9  | 68.99  | 15.34 | 1 |
| 6  | -14 | -9  | 279.72 | 26.38 | 1 |
| 5  | -14 | -9  | 3.83   | 8.94  | 1 |
| 4  | -14 | -9  | 5.68   | 8.60  | 1 |
| 3  | -14 | -9  | 7.34   | 8.77  | 1 |
| 2  | -14 | -9  | 1.16   | 8.08  | 1 |
| 1  | -14 | -9  | 26.54  | 11.02 | 1 |
| 0  | -14 | -9  | 25.77  | 11.48 | 1 |
| -1 | -14 | -9  | 32.11  | 12.52 | 1 |
| 11 | -15 | -9  | 1.69   | 8.64  | 1 |
| 10 | -15 | -9  | 41.35  | 12.87 | 1 |
| 9  | -15 | -9  | 9.83   | 9.08  | 1 |
| 8  | -15 | -9  | 56.54  | 15.04 | 1 |
| 7  | -15 | -9  | -1.37  | 8.35  | 1 |
| 6  | -15 | -9  | 15.43  | 10.46 | 1 |
| 5  | -15 | -9  | -0.92  | 8.86  | 1 |
| 4  | -15 | -9  | 90.84  | 17.69 | 1 |
| 3  | -15 | -9  | 28.15  | 11.88 | 1 |
| 2  | -15 | -9  | 6.26   | 9.50  | 1 |
| 1  | -15 | -9  | 23.75  | 11.99 | 1 |
| 10 | -16 | -9  | 13.31  | 10.74 | 1 |
| 9  | -16 | -9  | -5.98  | 8.42  | 1 |
| 8  | -16 | -9  | 0.18   | 7.79  | 1 |
| 7  | -16 | -9  | -2.76  | 7.18  | 1 |
| 6  | -16 | -9  | -4.90  | 7.57  | 1 |
| 5  | -16 | -9  | -15.32 | 6.62  | 1 |
| 4  | -16 | -9  | -1.50  | 9.59  | 1 |
| -2 | 20  | -10 | 0.92   | 9.75  | 2 |
| 2  | 19  | -10 | 18.56  | 9.12  | 1 |
| 1  | 19  | -10 | 44.38  | 12.11 | 1 |
| 0  | 19  | -10 | 30.15  | 9.73  | 1 |
| -1 | 19  | -10 | 6.23   | 7.58  | 1 |
| -1 | 19  | -10 | 10.30  | 9.03  | 2 |
| -2 | 19  | -10 | 50.06  | 11.71 | 1 |
| -2 | 19  | -10 | 49.54  | 13.59 | 2 |
| -3 | 19  | -10 | 16.49  | 8.04  | 1 |



|    |    |     |        |       |   |
|----|----|-----|--------|-------|---|
| -3 | 19 | -10 | 11.77  | 10.40 | 2 |
| -4 | 19 | -10 | 109.65 | 16.69 | 1 |
| -4 | 19 | -10 | 90.51  | 17.45 | 2 |
| -5 | 19 | -10 | 46.27  | 14.04 | 2 |
| -6 | 19 | -10 | -0.02  | 9.22  | 2 |
| 4  | 18 | -10 | 1.05   | 6.15  | 1 |
| 3  | 18 | -10 | 4.58   | 7.42  | 1 |
| 2  | 18 | -10 | 1.82   | 6.79  | 1 |
| 1  | 18 | -10 | 68.59  | 14.02 | 1 |
| 0  | 18 | -10 | -1.20  | 5.54  | 1 |
| 0  | 18 | -10 | -1.29  | 7.98  | 2 |
| -1 | 18 | -10 | 6.61   | 9.76  | 2 |
| -1 | 18 | -10 | 8.38   | 7.12  | 1 |
| -2 | 18 | -10 | 3.90   | 7.78  | 2 |
| -2 | 18 | -10 | 1.61   | 6.45  | 1 |
| -3 | 18 | -10 | -1.43  | 5.83  | 1 |
| -3 | 18 | -10 | -3.38  | 6.59  | 2 |
| -4 | 18 | -10 | -3.75  | 4.80  | 1 |
| -4 | 18 | -10 | 0.28   | 7.60  | 2 |
| -5 | 18 | -10 | 57.83  | 14.16 | 2 |
| -6 | 18 | -10 | 4.32   | 8.59  | 2 |
| -7 | 18 | -10 | -6.55  | 6.70  | 2 |
| -8 | 18 | -10 | 3.21   | 7.40  | 2 |
| 6  | 17 | -10 | 3.07   | 6.48  | 1 |
| 5  | 17 | -10 | 9.07   | 7.88  | 1 |
| 4  | 17 | -10 | -1.35  | 6.76  | 1 |
| 3  | 17 | -10 | 5.74   | 7.08  | 1 |
| 2  | 17 | -10 | 22.95  | 8.06  | 1 |
| 1  | 17 | -10 | 13.93  | 8.15  | 1 |
| 1  | 17 | -10 | 27.79  | 10.87 | 2 |
| 0  | 17 | -10 | -6.22  | 4.55  | 1 |
| 0  | 17 | -10 | -7.14  | 8.07  | 2 |
| -1 | 17 | -10 | 3.12   | 8.16  | 2 |
| -1 | 17 | -10 | 3.60   | 5.79  | 1 |
| -2 | 17 | -10 | 24.54  | 8.68  | 1 |
| -2 | 17 | -10 | 31.26  | 10.28 | 2 |
| -3 | 17 | -10 | 80.94  | 16.33 | 2 |
| -3 | 17 | -10 | 94.89  | 14.88 | 1 |
| -4 | 17 | -10 | 58.76  | 12.08 | 1 |
| -4 | 17 | -10 | 74.68  | 15.72 | 2 |
| -5 | 17 | -10 | 7.73   | 8.44  | 2 |
| -6 | 17 | -10 | 0.22   | 7.34  | 2 |
| -7 | 17 | -10 | 2.21   | 7.95  | 2 |
| -8 | 17 | -10 | 5.09   | 8.10  | 2 |
| -9 | 17 | -10 | 4.56   | 6.38  | 2 |
| 7  | 16 | -10 | -3.86  | 6.51  | 1 |

|     |    |     |        |       |   |
|-----|----|-----|--------|-------|---|
| 6   | 16 | -10 | 13.95  | 8.21  | 1 |
| 5   | 16 | -10 | 48.43  | 13.30 | 1 |
| 4   | 16 | -10 | 4.73   | 7.96  | 1 |
| 3   | 16 | -10 | 13.11  | 7.76  | 1 |
| 2   | 16 | -10 | 11.42  | 6.57  | 1 |
| 1   | 16 | -10 | 1.05   | 4.44  | 1 |
| 1   | 16 | -10 | -1.05  | 6.63  | 2 |
| 0   | 16 | -10 | 5.73   | 7.50  | 2 |
| 0   | 16 | -10 | 5.11   | 4.83  | 1 |
| -1  | 16 | -10 | 55.99  | 13.46 | 2 |
| -1  | 16 | -10 | 30.24  | 8.52  | 1 |
| -2  | 16 | -10 | -3.83  | 4.50  | 1 |
| -2  | 16 | -10 | 6.21   | 7.36  | 2 |
| -3  | 16 | -10 | 20.70  | 8.15  | 1 |
| -3  | 16 | -10 | 43.05  | 13.09 | 2 |
| -4  | 16 | -10 | 34.73  | 11.10 | 2 |
| -4  | 16 | -10 | 40.78  | 9.28  | 1 |
| -5  | 16 | -10 | 6.21   | 8.43  | 2 |
| -6  | 16 | -10 | 19.19  | 9.91  | 2 |
| -7  | 16 | -10 | 9.02   | 8.40  | 2 |
| -8  | 16 | -10 | 91.06  | 18.78 | 2 |
| -9  | 16 | -10 | 3.38   | 6.69  | 2 |
| -10 | 16 | -10 | 2.31   | 6.64  | 2 |
| 9   | 15 | -10 | -11.24 | 7.65  | 1 |
| 8   | 15 | -10 | 17.45  | 10.51 | 1 |
| 7   | 15 | -10 | 12.01  | 9.40  | 1 |
| 5   | 15 | -10 | 102.34 | 16.92 | 1 |
| 4   | 15 | -10 | 137.84 | 18.96 | 1 |
| 3   | 15 | -10 | 32.17  | 9.52  | 1 |
| 2   | 15 | -10 | 24.68  | 8.29  | 1 |
| 1   | 15 | -10 | -5.65  | 5.91  | 2 |
| 1   | 15 | -10 | 5.79   | 5.47  | 1 |
| 0   | 15 | -10 | 40.36  | 9.62  | 1 |
| 0   | 15 | -10 | 42.59  | 11.20 | 2 |
| -1  | 15 | -10 | 216.50 | 19.65 | 2 |
| -1  | 15 | -10 | 216.45 | 18.60 | 1 |
| -2  | 15 | -10 | 75.66  | 12.43 | 1 |
| -2  | 15 | -10 | 62.35  | 12.59 | 2 |
| -3  | 15 | -10 | 15.50  | 8.69  | 2 |
| -3  | 15 | -10 | 18.78  | 6.16  | 1 |
| -4  | 15 | -10 | 12.71  | 5.85  | 1 |
| -4  | 15 | -10 | 19.39  | 8.85  | 2 |
| -5  | 15 | -10 | 2.92   | 7.36  | 2 |
| -6  | 15 | -10 | 0.76   | 6.98  | 2 |
| -7  | 15 | -10 | 3.88   | 7.70  | 2 |
| -8  | 15 | -10 | 65.01  | 15.12 | 2 |

|     |    |     |        |       |   |
|-----|----|-----|--------|-------|---|
| -9  | 15 | -10 | 13.24  | 9.81  | 2 |
| -10 | 15 | -10 | -5.47  | 5.98  | 2 |
| 10  | 14 | -10 | 36.76  | 11.98 | 1 |
| 9   | 14 | -10 | 12.18  | 8.42  | 1 |
| 8   | 14 | -10 | 77.26  | 15.02 | 1 |
| 7   | 14 | -10 | -6.11  | 6.67  | 1 |
| 6   | 14 | -10 | 2.33   | 7.17  | 1 |
| 5   | 14 | -10 | 219.01 | 21.93 | 1 |
| 4   | 14 | -10 | 48.18  | 12.22 | 1 |
| 3   | 14 | -10 | 63.42  | 12.37 | 1 |
| 2   | 14 | -10 | -1.19  | 4.84  | 1 |
| 1   | 14 | -10 | 327.41 | 23.25 | 2 |
| 1   | 14 | -10 | 301.62 | 22.56 | 1 |
| 0   | 14 | -10 | 16.71  | 5.96  | 1 |
| 0   | 14 | -10 | 16.32  | 7.78  | 2 |
| -1  | 14 | -10 | 5.33   | 6.68  | 2 |
| -1  | 14 | -10 | -5.29  | 3.58  | 1 |
| -2  | 14 | -10 | 188.56 | 19.27 | 2 |
| -2  | 14 | -10 | 226.98 | 17.91 | 1 |
| -3  | 14 | -10 | 127.65 | 16.73 | 2 |
| -3  | 14 | -10 | 114.82 | 13.69 | 1 |
| -4  | 14 | -10 | 4.46   | 6.48  | 2 |
| -4  | 14 | -10 | 3.53   | 4.14  | 1 |
| -5  | 14 | -10 | -6.36  | 6.19  | 2 |
| -6  | 14 | -10 | 15.00  | 9.44  | 2 |
| -7  | 14 | -10 | 1.19   | 8.09  | 2 |
| -8  | 14 | -10 | 132.22 | 20.77 | 2 |
| -9  | 14 | -10 | 6.77   | 8.25  | 2 |
| -10 | 14 | -10 | -4.36  | 6.37  | 2 |
| -11 | 14 | -10 | -10.50 | 5.56  | 2 |
| 10  | 13 | -10 | -1.95  | 8.18  | 1 |
| 9   | 13 | -10 | 21.29  | 10.25 | 1 |
| 8   | 13 | -10 | 31.37  | 10.78 | 1 |
| 7   | 13 | -10 | 439.63 | 30.12 | 1 |
| 6   | 13 | -10 | 391.94 | 28.24 | 1 |
| 5   | 13 | -10 | 77.07  | 14.72 | 1 |
| 4   | 13 | -10 | 47.38  | 11.96 | 1 |
| 3   | 13 | -10 | 93.14  | 13.68 | 1 |
| 2   | 13 | -10 | 198.97 | 17.38 | 1 |
| 1   | 13 | -10 | 127.89 | 14.89 | 2 |
| 1   | 13 | -10 | 132.47 | 15.62 | 1 |
| 0   | 13 | -10 | 73.09  | 11.84 | 1 |
| 0   | 13 | -10 | 73.90  | 12.41 | 2 |
| -1  | 13 | -10 | 0.90   | 5.86  | 2 |
| -1  | 13 | -10 | -4.75  | 3.26  | 1 |
| -2  | 13 | -10 | 41.32  | 8.72  | 1 |

|     |    |     |        |       |   |
|-----|----|-----|--------|-------|---|
| -2  | 13 | -10 | 46.76  | 10.63 | 2 |
| -3  | 13 | -10 | 23.30  | 6.28  | 1 |
| -3  | 13 | -10 | 10.32  | 6.42  | 2 |
| -4  | 13 | -10 | 41.27  | 10.86 | 2 |
| -4  | 13 | -10 | 26.72  | 7.04  | 1 |
| -5  | 13 | -10 | 50.25  | 11.94 | 2 |
| -6  | 13 | -10 | 434.67 | 30.70 | 2 |
| -7  | 13 | -10 | 18.25  | 9.53  | 2 |
| -8  | 13 | -10 | 20.59  | 10.65 | 2 |
| -9  | 13 | -10 | 18.89  | 10.52 | 2 |
| -10 | 13 | -10 | 12.66  | 9.03  | 2 |
| -11 | 13 | -10 | -1.86  | 5.99  | 2 |
| 10  | 12 | -10 | 27.85  | 10.32 | 1 |
| 9   | 12 | -10 | 56.03  | 13.91 | 1 |
| 8   | 12 | -10 | 10.85  | 8.21  | 1 |
| 7   | 12 | -10 | 444.08 | 29.51 | 1 |
| 6   | 12 | -10 | -1.88  | 6.02  | 1 |
| 5   | 12 | -10 | 107.66 | 15.18 | 1 |
| 4   | 12 | -10 | 108.49 | 15.20 | 1 |
| 3   | 12 | -10 | 71.40  | 11.86 | 1 |
| 2   | 12 | -10 | 24.49  | 7.15  | 1 |
| 2   | 12 | -10 | 10.62  | 5.45  | 2 |
| 1   | 12 | -10 | 7.77   | 4.25  | 1 |
| 1   | 12 | -10 | 0.42   | 4.68  | 2 |
| 0   | 12 | -10 | 321.76 | 21.42 | 1 |
| 0   | 12 | -10 | 352.34 | 21.95 | 2 |
| -1  | 12 | -10 | -0.19  | 5.14  | 2 |
| -1  | 12 | -10 | 5.98   | 4.70  | 1 |
| -2  | 12 | -10 | 144.88 | 15.80 | 2 |
| -2  | 12 | -10 | 131.65 | 13.99 | 1 |
| -3  | 12 | -10 | 24.78  | 6.40  | 1 |
| -3  | 12 | -10 | 27.21  | 9.25  | 2 |
| -4  | 12 | -10 | 235.09 | 16.61 | 1 |
| -4  | 12 | -10 | 199.24 | 20.13 | 2 |
| -5  | 12 | -10 | 57.82  | 12.49 | 2 |
| -6  | 12 | -10 | 362.66 | 27.11 | 2 |
| -7  | 12 | -10 | 75.70  | 15.59 | 2 |
| -8  | 12 | -10 | 29.08  | 10.60 | 2 |
| -9  | 12 | -10 | 77.39  | 15.76 | 2 |
| -10 | 12 | -10 | 53.25  | 13.31 | 2 |
| -11 | 12 | -10 | -1.11  | 6.04  | 2 |
| -12 | 12 | -10 | 0.05   | 5.58  | 2 |
| 11  | 11 | -10 | -3.08  | 8.09  | 1 |
| 10  | 11 | -10 | -10.47 | 6.20  | 1 |
| 9   | 11 | -10 | 201.61 | 21.29 | 1 |
| 8   | 11 | -10 | 59.89  | 13.36 | 1 |

|     |    |     |        |       |   |
|-----|----|-----|--------|-------|---|
| 7   | 11 | -10 | 10.34  | 7.00  | 1 |
| 6   | 11 | -10 | 50.08  | 11.35 | 1 |
| 5   | 11 | -10 | 200.20 | 17.79 | 1 |
| 4   | 11 | -10 | 37.87  | 9.62  | 1 |
| 3   | 11 | -10 | 100.73 | 13.54 | 1 |
| 2   | 11 | -10 | 119.91 | 12.38 | 2 |
| 2   | 11 | -10 | 128.37 | 14.71 | 1 |
| 1   | 11 | -10 | -0.93  | 3.09  | 2 |
| 1   | 11 | -10 | -1.61  | 4.07  | 1 |
| 0   | 11 | -10 | 358.73 | 21.04 | 2 |
| 0   | 11 | -10 | 357.08 | 22.13 | 1 |
| -1  | 11 | -10 | 16.71  | 5.77  | 1 |
| -1  | 11 | -10 | 24.50  | 6.84  | 2 |
| -2  | 11 | -10 | 0.20   | 3.18  | 1 |
| -2  | 11 | -10 | 2.13   | 4.65  | 2 |
| -3  | 11 | -10 | 171.08 | 17.57 | 2 |
| -3  | 11 | -10 | 195.84 | 14.80 | 1 |
| -4  | 11 | -10 | 267.44 | 21.31 | 2 |
| -4  | 11 | -10 | 307.72 | 18.56 | 1 |
| -5  | 11 | -10 | 1.27   | 5.30  | 2 |
| -6  | 11 | -10 | 4.33   | 5.66  | 2 |
| -7  | 11 | -10 | 46.14  | 11.63 | 2 |
| -8  | 11 | -10 | 24.16  | 9.46  | 2 |
| -9  | 11 | -10 | 37.53  | 11.49 | 2 |
| -10 | 11 | -10 | 22.26  | 10.13 | 2 |
| -11 | 11 | -10 | 0.72   | 6.63  | 2 |
| -12 | 11 | -10 | 1.47   | 5.61  | 2 |
| 11  | 10 | -10 | -2.28  | 8.03  | 1 |
| 10  | 10 | -10 | -2.96  | 7.53  | 1 |
| 9   | 10 | -10 | 73.41  | 14.00 | 1 |
| 8   | 10 | -10 | 22.10  | 8.15  | 1 |
| 7   | 10 | -10 | -3.73  | 4.71  | 1 |
| 6   | 10 | -10 | 62.16  | 12.25 | 1 |
| 5   | 10 | -10 | 2.34   | 4.71  | 1 |
| 4   | 10 | -10 | -3.47  | 4.46  | 1 |
| 3   | 10 | -10 | 636.75 | 32.10 | 1 |
| 2   | 10 | -10 | 276.41 | 17.49 | 2 |
| 2   | 10 | -10 | 316.49 | 20.50 | 1 |
| 1   | 10 | -10 | 39.22  | 8.36  | 1 |
| 1   | 10 | -10 | 50.34  | 8.48  | 2 |
| 0   | 10 | -10 | -4.70  | 2.44  | 1 |
| 0   | 10 | -10 | 0.25   | 3.08  | 2 |
| -1  | 10 | -10 | 67.56  | 10.30 | 1 |
| -1  | 10 | -10 | 69.33  | 10.44 | 2 |
| -2  | 10 | -10 | 172.43 | 13.73 | 1 |
| -2  | 10 | -10 | 198.12 | 15.79 | 2 |

|     |    |     |         |       |   |
|-----|----|-----|---------|-------|---|
| -3  | 10 | -10 | 234.06  | 18.87 | 2 |
| -3  | 10 | -10 | 262.36  | 16.86 | 1 |
| -4  | 10 | -10 | 69.51   | 12.55 | 2 |
| -4  | 10 | -10 | 64.79   | 9.23  | 1 |
| -5  | 10 | -10 | 52.52   | 11.19 | 2 |
| -6  | 10 | -10 | -0.82   | 5.27  | 2 |
| -7  | 10 | -10 | 90.98   | 15.43 | 2 |
| -8  | 10 | -10 | 12.19   | 7.54  | 2 |
| -9  | 10 | -10 | 116.46  | 18.78 | 2 |
| -10 | 10 | -10 | 694.18  | 42.20 | 2 |
| -11 | 10 | -10 | 45.38   | 12.64 | 2 |
| -12 | 10 | -10 | -3.23   | 5.76  | 2 |
| 11  | 9  | -10 | 301.22  | 23.77 | 1 |
| 10  | 9  | -10 | 19.08   | 8.14  | 1 |
| 9   | 9  | -10 | 151.25  | 16.91 | 1 |
| 8   | 9  | -10 | 20.07   | 7.85  | 1 |
| 7   | 9  | -10 | 21.75   | 7.52  | 1 |
| 6   | 9  | -10 | 38.74   | 10.07 | 1 |
| 5   | 9  | -10 | 156.28  | 16.21 | 1 |
| 4   | 9  | -10 | 59.25   | 10.78 | 1 |
| 3   | 9  | -10 | 19.60   | 6.75  | 1 |
| 2   | 9  | -10 | 2.67    | 3.11  | 2 |
| 2   | 9  | -10 | 4.46    | 3.83  | 1 |
| 1   | 9  | -10 | 19.74   | 5.47  | 2 |
| 1   | 9  | -10 | 15.97   | 5.73  | 1 |
| 0   | 9  | -10 | 141.97  | 12.67 | 1 |
| -1  | 9  | -10 | 1416.84 | 52.91 | 1 |
| -1  | 9  | -10 | 1437.14 | 53.71 | 2 |
| -2  | 9  | -10 | 320.02  | 20.24 | 2 |
| -2  | 9  | -10 | 312.28  | 18.98 | 1 |
| -3  | 9  | -10 | -2.79   | 3.96  | 2 |
| -3  | 9  | -10 | 1.73    | 3.25  | 1 |
| -4  | 9  | -10 | 731.68  | 31.63 | 1 |
| -4  | 9  | -10 | 746.23  | 37.03 | 2 |
| -5  | 9  | -10 | 50.25   | 11.34 | 2 |
| -6  | 9  | -10 | 231.76  | 20.44 | 2 |
| -7  | 9  | -10 | 53.87   | 12.34 | 2 |
| -8  | 9  | -10 | 140.29  | 18.85 | 2 |
| -9  | 9  | -10 | 15.44   | 9.31  | 2 |
| -10 | 9  | -10 | 64.64   | 14.81 | 2 |
| -11 | 9  | -10 | 79.09   | 16.34 | 2 |
| -12 | 9  | -10 | 8.54    | 6.11  | 2 |
| -13 | -8 | 10  | 1.61    | 6.90  | 3 |
| -12 | -8 | 10  | 9.46    | 8.17  | 3 |
| 11  | 8  | -10 | -0.52   | 6.77  | 1 |
| -11 | -8 | 10  | 2.55    | 6.78  | 3 |

|     |    |     |        |       |   |
|-----|----|-----|--------|-------|---|
| 10  | 8  | -10 | 42.24  | 10.05 | 1 |
| -10 | -8 | 10  | 35.04  | 10.22 | 3 |
| -9  | -8 | 10  | 264.03 | 19.99 | 3 |
| 9   | 8  | -10 | 266.93 | 20.76 | 1 |
| -8  | -8 | 10  | 177.29 | 15.73 | 3 |
| 8   | 8  | -10 | 209.98 | 18.04 | 1 |
| 7   | 8  | -10 | 5.42   | 5.47  | 1 |
| -7  | -8 | 10  | 4.75   | 4.92  | 3 |
| 6   | 8  | -10 | 22.58  | 7.34  | 1 |
| 5   | 8  | -10 | 770.20 | 36.25 | 1 |
| 4   | 8  | -10 | 201.19 | 16.29 | 1 |
| 3   | 8  | -10 | 350.86 | 21.56 | 1 |
| 2   | 8  | -10 | 14.57  | 5.24  | 1 |
| 2   | 8  | -10 | 22.90  | 4.62  | 2 |
| 1   | 8  | -10 | 258.43 | 17.48 | 1 |
| 1   | 8  | -10 | 293.32 | 16.25 | 2 |
| 0   | 8  | -10 | 5.35   | 3.71  | 2 |
| 0   | 8  | -10 | 10.57  | 4.60  | 1 |
| -1  | 8  | -10 | 329.82 | 19.45 | 2 |
| -1  | 8  | -10 | 366.16 | 20.27 | 1 |
| -2  | 8  | -10 | 384.31 | 22.08 | 2 |
| -2  | 8  | -10 | 378.89 | 20.93 | 1 |
| -3  | 8  | -10 | 36.27  | 8.31  | 2 |
| -3  | 8  | -10 | 33.84  | 7.18  | 1 |
| -4  | 8  | -10 | 126.25 | 10.94 | 1 |
| -4  | 8  | -10 | 125.08 | 14.89 | 2 |
| -5  | 8  | -10 | 91.28  | 13.86 | 2 |
| -6  | 8  | -10 | 3.83   | 5.83  | 2 |
| -7  | 8  | -10 | 2.86   | 5.18  | 2 |
| -8  | 8  | -10 | 229.22 | 22.29 | 2 |
| -9  | 8  | -10 | -1.89  | 6.16  | 2 |
| -10 | 8  | -10 | 12.52  | 8.13  | 2 |
| -11 | 8  | -10 | 20.51  | 9.33  | 2 |
| -12 | 8  | -10 | -3.69  | 5.33  | 2 |
| -15 | -7 | 10  | 7.68   | 10.15 | 3 |
| -14 | -7 | 10  | 18.55  | 9.47  | 3 |
| -13 | -7 | 10  | 182.32 | 21.09 | 3 |
| -12 | -7 | 10  | 14.79  | 8.88  | 3 |
| -11 | -7 | 10  | 35.43  | 10.94 | 3 |
| 11  | 7  | -10 | 52.99  | 11.70 | 1 |
| 10  | 7  | -10 | 36.50  | 9.80  | 1 |
| -10 | -7 | 10  | 40.02  | 9.83  | 3 |
| 9   | 7  | -10 | 55.71  | 11.15 | 1 |
| -9  | -7 | 10  | 60.49  | 11.14 | 3 |
| 8   | 7  | -10 | -5.11  | 4.74  | 1 |
| -8  | -7 | 10  | 9.73   | 5.60  | 3 |

|     |    |     |        |       |   |
|-----|----|-----|--------|-------|---|
| -7  | -7 | 10  | 53.26  | 9.12  | 3 |
| 7   | 7  | -10 | 57.34  | 10.65 | 1 |
| -6  | -7 | 10  | 122.39 | 12.13 | 3 |
| 6   | 7  | -10 | 116.51 | 13.91 | 1 |
| -5  | -7 | 10  | -2.66  | 3.13  | 3 |
| 5   | 7  | -10 | 1.40   | 4.40  | 1 |
| 4   | 7  | -10 | 233.76 | 17.00 | 1 |
| -4  | -7 | 10  | 248.65 | 15.53 | 3 |
| 3   | 7  | -10 | 17.15  | 5.65  | 1 |
| -3  | -7 | 10  | 34.67  | 7.00  | 3 |
| 2   | 7  | -10 | 183.18 | 14.55 | 1 |
| 2   | 7  | -10 | 195.80 | 11.92 | 2 |
| 1   | 7  | -10 | 370.28 | 18.53 | 2 |
| 1   | 7  | -10 | 389.65 | 21.65 | 1 |
| 0   | 7  | -10 | 521.68 | 24.15 | 2 |
| 0   | 7  | -10 | 543.20 | 26.33 | 1 |
| -1  | 7  | -10 | 27.49  | 6.19  | 2 |
| -1  | 7  | -10 | 21.49  | 5.88  | 1 |
| -2  | 7  | -10 | 328.17 | 18.56 | 1 |
| -2  | 7  | -10 | 298.22 | 19.57 | 2 |
| -3  | 7  | -10 | 88.22  | 9.60  | 1 |
| -3  | 7  | -10 | 78.84  | 11.34 | 2 |
| -4  | 7  | -10 | 16.02  | 6.54  | 2 |
| -4  | 7  | -10 | 20.68  | 5.21  | 1 |
| -5  | 7  | -10 | 95.16  | 13.55 | 2 |
| -6  | 7  | -10 | 143.98 | 17.03 | 2 |
| -7  | 7  | -10 | 4.93   | 5.74  | 2 |
| -8  | 7  | -10 | 16.82  | 8.36  | 2 |
| -9  | 7  | -10 | 92.91  | 15.97 | 2 |
| -10 | 7  | -10 | 11.40  | 9.20  | 2 |
| -11 | 7  | -10 | 178.84 | 22.42 | 2 |
| -12 | 7  | -10 | 1.42   | 4.91  | 2 |
| -15 | -6 | 10  | 13.13  | 10.55 | 3 |
| -14 | -6 | 10  | 21.61  | 9.90  | 3 |
| -13 | -6 | 10  | 72.26  | 14.55 | 3 |
| -12 | -6 | 10  | 178.96 | 20.27 | 3 |
| -11 | -6 | 10  | 55.16  | 12.72 | 3 |
| 11  | 6  | -10 | 42.91  | 10.65 | 1 |
| 10  | 6  | -10 | 11.51  | 6.67  | 1 |
| -10 | -6 | 10  | 5.25   | 5.85  | 3 |
| -9  | -6 | 10  | 457.12 | 26.80 | 3 |
| 9   | 6  | -10 | 440.79 | 26.03 | 1 |
| 8   | 6  | -10 | 271.13 | 19.49 | 1 |
| -8  | -6 | 10  | 214.64 | 17.31 | 3 |
| 7   | 6  | -10 | 44.10  | 9.45  | 1 |
| -7  | -6 | 10  | 35.12  | 8.10  | 3 |



|     |    |     |        |       |   |
|-----|----|-----|--------|-------|---|
| -6  | -6 | 10  | 65.46  | 9.71  | 3 |
| 6   | 6  | -10 | 53.54  | 9.93  | 1 |
| -5  | -6 | 10  | 6.71   | 4.23  | 3 |
| 5   | 6  | -10 | 17.05  | 6.25  | 1 |
| -4  | -6 | 10  | 1.09   | 3.04  | 3 |
| 4   | 6  | -10 | 1.02   | 3.12  | 1 |
| 3   | 6  | -10 | 314.79 | 19.58 | 1 |
| -3  | -6 | 10  | 361.88 | 19.37 | 3 |
| 2   | 6  | -10 | 2.87   | 3.22  | 1 |
| 2   | 6  | -10 | 6.19   | 3.18  | 2 |
| 1   | 6  | -10 | 10.27  | 4.28  | 1 |
| 1   | 6  | -10 | 7.67   | 3.60  | 2 |
| 0   | 6  | -10 | 5.26   | 3.42  | 2 |
| 0   | 6  | -10 | 1.70   | 3.48  | 1 |
| -1  | 6  | -10 | -0.72  | 3.47  | 2 |
| -1  | 6  | -10 | -0.10  | 2.73  | 1 |
| -2  | 6  | -10 | 12.57  | 5.55  | 2 |
| -2  | 6  | -10 | 19.09  | 5.25  | 1 |
| -3  | 6  | -10 | 98.68  | 9.96  | 1 |
| -3  | 6  | -10 | 88.33  | 12.00 | 2 |
| -4  | 6  | -10 | 22.95  | 5.56  | 1 |
| -4  | 6  | -10 | 15.11  | 5.79  | 2 |
| -5  | 6  | -10 | 380.94 | 24.06 | 2 |
| -6  | 6  | -10 | 204.57 | 18.12 | 2 |
| -7  | 6  | -10 | 70.48  | 12.66 | 2 |
| -8  | 6  | -10 | 107.89 | 16.09 | 2 |
| -9  | 6  | -10 | 29.09  | 9.74  | 2 |
| -10 | 6  | -10 | 130.65 | 18.83 | 2 |
| -11 | 6  | -10 | 72.03  | 15.26 | 2 |
| -12 | 6  | -10 | 3.48   | 5.45  | 2 |
| -15 | -5 | 10  | 53.67  | 14.11 | 3 |
| -14 | -5 | 10  | 76.07  | 16.07 | 3 |
| -13 | -5 | 10  | 0.57   | 6.67  | 3 |
| -12 | -5 | 10  | 0.42   | 6.69  | 3 |
| -11 | -5 | 10  | -0.23  | 5.90  | 3 |
| 11  | 5  | -10 | 3.24   | 5.77  | 1 |
| -10 | -5 | 10  | 57.35  | 11.65 | 3 |
| 10  | 5  | -10 | 37.02  | 9.14  | 1 |
| 9   | 5  | -10 | 164.43 | 15.68 | 1 |
| -9  | -5 | 10  | 127.56 | 14.92 | 3 |
| 8   | 5  | -10 | 51.31  | 9.83  | 1 |
| -8  | -5 | 10  | 54.34  | 9.87  | 3 |
| 7   | 5  | -10 | 44.61  | 9.24  | 1 |
| -7  | -5 | 10  | 47.13  | 8.85  | 3 |
| 6   | 5  | -10 | 61.11  | 10.10 | 1 |
| -6  | -5 | 10  | 72.76  | 9.82  | 3 |

|     |    |     |        |       |   |
|-----|----|-----|--------|-------|---|
| 5   | 5  | -10 | 63.57  | 9.88  | 1 |
| -5  | -5 | 10  | 64.41  | 9.04  | 3 |
| -4  | -5 | 10  | 257.79 | 16.33 | 3 |
| 4   | 5  | -10 | 264.46 | 17.80 | 1 |
| 3   | 5  | -10 | 78.10  | 6.09  | 2 |
| 3   | 5  | -10 | 71.20  | 9.79  | 1 |
| -3  | -5 | 10  | 87.31  | 10.10 | 3 |
| 2   | 5  | -10 | 609.00 | 27.68 | 1 |
| 2   | 5  | -10 | 548.12 | 22.51 | 2 |
| 1   | 5  | -10 | 290.59 | 15.22 | 2 |
| 1   | 5  | -10 | 271.01 | 17.21 | 1 |
| 0   | 5  | -10 | 14.91  | 4.51  | 2 |
| 0   | 5  | -10 | 17.60  | 5.28  | 1 |
| -1  | 5  | -10 | 52.66  | 8.38  | 2 |
| -1  | 5  | -10 | 48.49  | 7.81  | 1 |
| -2  | 5  | -10 | 150.40 | 12.82 | 2 |
| -2  | 5  | -10 | 128.47 | 11.34 | 1 |
| -3  | 5  | -10 | 270.15 | 18.56 | 2 |
| -3  | 5  | -10 | 253.53 | 15.66 | 1 |
| -4  | 5  | -10 | 47.85  | 7.20  | 1 |
| -4  | 5  | -10 | 74.61  | 11.58 | 2 |
| -5  | 5  | -10 | -1.42  | 4.37  | 2 |
| -6  | 5  | -10 | 11.55  | 6.78  | 2 |
| -7  | 5  | -10 | 40.09  | 10.37 | 2 |
| -8  | 5  | -10 | 340.97 | 25.59 | 2 |
| -9  | 5  | -10 | 139.17 | 19.26 | 2 |
| -10 | 5  | -10 | 5.20   | 7.39  | 2 |
| -11 | 5  | -10 | 8.57   | 7.01  | 2 |
| -12 | 5  | -10 | 3.63   | 5.66  | 2 |
| -16 | -4 | 10  | 65.44  | 16.99 | 3 |
| -15 | -4 | 10  | 34.24  | 12.54 | 3 |
| -14 | -4 | 10  | 33.57  | 11.25 | 3 |
| -13 | -4 | 10  | 1.93   | 7.25  | 3 |
| -12 | -4 | 10  | 110.81 | 16.51 | 3 |
| 11  | 4  | -10 | 103.40 | 13.33 | 1 |
| -11 | -4 | 10  | 117.28 | 15.96 | 3 |
| -10 | -4 | 10  | 143.20 | 16.12 | 3 |
| 10  | 4  | -10 | 138.25 | 14.70 | 1 |
| -9  | -4 | 10  | 64.19  | 11.19 | 3 |
| 9   | 4  | -10 | 39.21  | 8.67  | 1 |
| -8  | -4 | 10  | 49.54  | 9.65  | 3 |
| 8   | 4  | -10 | 49.41  | 9.60  | 1 |
| 7   | 4  | -10 | 48.89  | 8.78  | 1 |
| -7  | -4 | 10  | 46.46  | 8.82  | 3 |
| 6   | 4  | -10 | 44.12  | 8.68  | 1 |
| -6  | -4 | 10  | 35.78  | 7.74  | 3 |

|     |    |     |         |       |   |
|-----|----|-----|---------|-------|---|
| 5   | 4  | -10 | 40.77   | 8.35  | 1 |
| -5  | -4 | 10  | 26.92   | 6.90  | 3 |
| -4  | -4 | 10  | 462.31  | 23.53 | 3 |
| 4   | 4  | -10 | 436.90  | 23.71 | 1 |
| 3   | 4  | -10 | 33.77   | 6.98  | 1 |
| 3   | 4  | -10 | 30.26   | 3.98  | 2 |
| 2   | 4  | -10 | 29.10   | 4.79  | 2 |
| 2   | 4  | -10 | 29.28   | 6.62  | 1 |
| 1   | 4  | -10 | 1.71    | 2.90  | 2 |
| 1   | 4  | -10 | 7.82    | 3.91  | 1 |
| 0   | 4  | -10 | 2.19    | 3.04  | 2 |
| 0   | 4  | -10 | 0.52    | 2.81  | 1 |
| -1  | 4  | -10 | 37.21   | 6.96  | 1 |
| -1  | 4  | -10 | 48.35   | 8.48  | 2 |
| -2  | 4  | -10 | 394.12  | 21.45 | 2 |
| -2  | 4  | -10 | 343.00  | 18.87 | 1 |
| -3  | 4  | -10 | 438.76  | 24.45 | 2 |
| -3  | 4  | -10 | 474.25  | 22.14 | 1 |
| -4  | 4  | -10 | 211.89  | 16.58 | 2 |
| -4  | 4  | -10 | 235.15  | 14.44 | 1 |
| -5  | 4  | -10 | 33.97   | 8.44  | 2 |
| -6  | 4  | -10 | 1.33    | 4.44  | 2 |
| -7  | 4  | -10 | 91.13   | 14.23 | 2 |
| -8  | 4  | -10 | 37.40   | 10.99 | 2 |
| -9  | 4  | -10 | 15.43   | 8.96  | 2 |
| -10 | 4  | -10 | 75.25   | 14.95 | 2 |
| -11 | 4  | -10 | 11.43   | 7.73  | 2 |
| -12 | 4  | -10 | -6.51   | 6.16  | 2 |
| -16 | -3 | 10  | -12.02  | 7.56  | 3 |
| -15 | -3 | 10  | -1.07   | 7.95  | 3 |
| -14 | -3 | 10  | -9.08   | 5.59  | 3 |
| -13 | -3 | 10  | 0.89    | 6.57  | 3 |
| -12 | -3 | 10  | -2.19   | 5.44  | 3 |
| 11  | 3  | -10 | 11.74   | 6.79  | 1 |
| -11 | -3 | 10  | 16.63   | 7.52  | 3 |
| -10 | -3 | 10  | 34.24   | 9.11  | 3 |
| 10  | 3  | -10 | 40.18   | 8.69  | 1 |
| 9   | 3  | -10 | 6.01    | 4.75  | 1 |
| -9  | -3 | 10  | 0.45    | 4.28  | 3 |
| 8   | 3  | -10 | 79.13   | 10.95 | 1 |
| -8  | -3 | 10  | 57.57   | 10.42 | 3 |
| -7  | -3 | 10  | -0.14   | 3.89  | 3 |
| 7   | 3  | -10 | 2.66    | 3.70  | 1 |
| -6  | -3 | 10  | -1.33   | 3.29  | 3 |
| 6   | 3  | -10 | 3.53    | 4.09  | 1 |
| -5  | -3 | 10  | 1037.27 | 41.79 | 3 |

|     |    |     |         |       |   |
|-----|----|-----|---------|-------|---|
| 5   | 3  | -10 | 1037.01 | 41.60 | 1 |
| 4   | 3  | -10 | 694.08  | 31.15 | 1 |
| -4  | -3 | 10  | 703.94  | 31.91 | 3 |
| 3   | 3  | -10 | 19.09   | 3.37  | 2 |
| 3   | 3  | -10 | 17.24   | 5.23  | 1 |
| 2   | 3  | -10 | 42.69   | 7.55  | 1 |
| 2   | 3  | -10 | 38.63   | 5.33  | 2 |
| 1   | 3  | -10 | 20.72   | 5.59  | 1 |
| 1   | 3  | -10 | 19.31   | 5.17  | 2 |
| 0   | 3  | -10 | 51.39   | 7.54  | 2 |
| 0   | 3  | -10 | 50.71   | 7.95  | 1 |
| -1  | 3  | -10 | 171.53  | 12.94 | 1 |
| -1  | 3  | -10 | 182.67  | 13.19 | 2 |
| -2  | 3  | -10 | 182.97  | 14.36 | 2 |
| -2  | 3  | -10 | 156.73  | 12.27 | 1 |
| -3  | 3  | -10 | 1.41    | 4.05  | 2 |
| -3  | 3  | -10 | 0.39    | 2.72  | 1 |
| -4  | 3  | -10 | 29.68   | 6.27  | 1 |
| -4  | 3  | -10 | 24.86   | 7.09  | 2 |
| -5  | 3  | -10 | 96.99   | 13.64 | 2 |
| -6  | 3  | -10 | 37.12   | 9.64  | 2 |
| -7  | 3  | -10 | 161.46  | 18.62 | 2 |
| -8  | 3  | -10 | 372.58  | 27.04 | 2 |
| -9  | 3  | -10 | 79.70   | 15.34 | 2 |
| -10 | 3  | -10 | -0.31   | 6.57  | 2 |
| -11 | 3  | -10 | -1.25   | 5.81  | 2 |
| -12 | 3  | -10 | 8.64    | 8.10  | 2 |
| -16 | -2 | 10  | 140.14  | 22.06 | 3 |
| -15 | -2 | 10  | 27.32   | 11.16 | 3 |
| -14 | -2 | 10  | 99.56   | 17.74 | 3 |
| -13 | -2 | 10  | 107.92  | 17.11 | 3 |
| -12 | -2 | 10  | 4.29    | 6.06  | 3 |
| -11 | -2 | 10  | 446.16  | 28.43 | 3 |
| 11  | 2  | -10 | 454.86  | 25.36 | 1 |
| -10 | -2 | 10  | 280.86  | 21.20 | 3 |
| 10  | 2  | -10 | 290.64  | 19.65 | 1 |
| 9   | 2  | -10 | 81.12   | 11.14 | 1 |
| -9  | -2 | 10  | 94.50   | 12.74 | 3 |
| 8   | 2  | -10 | 125.84  | 12.84 | 1 |
| -8  | -2 | 10  | 105.93  | 12.99 | 3 |
| -7  | -2 | 10  | 300.59  | 19.45 | 3 |
| 7   | 2  | -10 | 314.34  | 19.71 | 1 |
| -6  | -2 | 10  | 183.89  | 14.39 | 3 |
| 6   | 2  | -10 | 152.68  | 13.20 | 1 |
| -5  | -2 | 10  | 24.07   | 6.85  | 3 |
| 5   | 2  | -10 | 24.60   | 6.59  | 1 |

|     |    |     |        |       |   |
|-----|----|-----|--------|-------|---|
| -4  | -2 | 10  | 492.06 | 25.77 | 3 |
| 4   | 2  | -10 | 481.74 | 24.65 | 1 |
| 3   | 2  | -10 | 45.83  | 8.00  | 1 |
| 3   | 2  | -10 | 38.04  | 4.72  | 2 |
| 2   | 2  | -10 | 13.72  | 4.09  | 2 |
| 2   | 2  | -10 | 10.70  | 4.50  | 1 |
| 1   | 2  | -10 | 203.87 | 12.82 | 2 |
| 1   | 2  | -10 | 200.85 | 13.91 | 1 |
| 0   | 2  | -10 | 44.67  | 7.19  | 2 |
| 0   | 2  | -10 | 43.56  | 7.72  | 1 |
| -1  | 2  | -10 | 281.10 | 16.62 | 1 |
| -1  | 2  | -10 | 277.95 | 16.99 | 2 |
| -2  | 2  | -10 | 660.68 | 30.07 | 2 |
| -2  | 2  | -10 | 634.86 | 27.83 | 1 |
| -3  | 2  | -10 | -4.33  | 2.81  | 1 |
| -3  | 2  | -10 | 1.89   | 3.43  | 2 |
| -4  | 2  | -10 | 110.46 | 10.37 | 1 |
| -4  | 2  | -10 | 133.43 | 14.16 | 2 |
| -5  | 2  | -10 | 86.01  | 13.11 | 2 |
| -6  | 2  | -10 | 190.03 | 19.22 | 2 |
| -7  | 2  | -10 | 0.84   | 5.22  | 2 |
| -8  | 2  | -10 | 0.66   | 5.84  | 2 |
| -9  | 2  | -10 | 51.50  | 13.48 | 2 |
| -10 | 2  | -10 | 12.99  | 8.87  | 2 |
| -11 | 2  | -10 | -0.26  | 6.67  | 2 |
| -12 | 2  | -10 | 9.06   | 8.81  | 2 |
| -17 | -1 | 10  | 13.91  | 11.09 | 3 |
| -16 | -1 | 10  | 120.22 | 20.52 | 3 |
| -15 | -1 | 10  | 7.56   | 8.15  | 3 |
| -14 | -1 | 10  | 29.07  | 10.92 | 3 |
| -13 | -1 | 10  | 307.13 | 24.87 | 3 |
| -12 | -1 | 10  | 336.56 | 25.21 | 3 |
| 11  | 1  | -10 | 3.37   | 4.32  | 1 |
| -11 | -1 | 10  | 6.00   | 5.76  | 3 |
| 10  | 1  | -10 | 0.52   | 4.05  | 1 |
| -10 | -1 | 10  | 4.06   | 4.76  | 3 |
| 9   | 1  | -10 | 19.63  | 6.50  | 1 |
| -9  | -1 | 10  | 25.76  | 8.08  | 3 |
| 8   | 1  | -10 | -1.00  | 3.40  | 1 |
| -8  | -1 | 10  | 6.10   | 4.92  | 3 |
| -7  | -1 | 10  | 696.69 | 32.83 | 3 |
| 7   | 1  | -10 | 678.23 | 31.59 | 1 |
| 6   | 1  | -10 | 203.84 | 15.48 | 1 |
| -6  | -1 | 10  | 221.55 | 16.43 | 3 |
| 5   | 1  | -10 | 64.00  | 9.42  | 1 |
| -5  | -1 | 10  | 69.43  | 10.29 | 3 |

|     |    |     |         |       |   |
|-----|----|-----|---------|-------|---|
| 4   | 1  | -10 | 6.93    | 4.34  | 1 |
| -4  | -1 | 10  | 32.56   | 7.76  | 3 |
| 3   | 1  | -10 | 4.32    | 2.60  | 2 |
| 3   | 1  | -10 | -2.38   | 2.81  | 1 |
| 2   | 1  | -10 | 554.45  | 25.33 | 1 |
| 2   | 1  | -10 | 507.90  | 21.72 | 2 |
| 1   | 1  | -10 | 5.12    | 3.44  | 1 |
| 1   | 1  | -10 | 6.60    | 3.77  | 2 |
| 0   | 1  | -10 | 2500.11 | 80.43 | 1 |
| -1  | 1  | -10 | 2.49    | 3.04  | 1 |
| -1  | 1  | -10 | 1.10    | 3.51  | 2 |
| -2  | 1  | -10 | 65.60   | 8.62  | 1 |
| -2  | 1  | -10 | 76.11   | 10.32 | 2 |
| -3  | 1  | -10 | 23.71   | 6.03  | 1 |
| -3  | 1  | -10 | 25.31   | 7.18  | 2 |
| -4  | 1  | -10 | 2.40    | 4.26  | 2 |
| -4  | 1  | -10 | -3.49   | 3.13  | 1 |
| -5  | 1  | -10 | 139.20  | 16.15 | 2 |
| -6  | 1  | -10 | 329.31  | 23.75 | 2 |
| -7  | 1  | -10 | 17.57   | 7.75  | 2 |
| -8  | 1  | -10 | -1.19   | 5.53  | 2 |
| -9  | 1  | -10 | -4.19   | 6.22  | 2 |
| -10 | 1  | -10 | 69.14   | 15.29 | 2 |
| -11 | 1  | -10 | 5.22    | 6.70  | 2 |
| -17 | 0  | 10  | 14.89   | 11.47 | 3 |
| -16 | 0  | 10  | 65.22   | 16.44 | 3 |
| -15 | 0  | 10  | -5.05   | 6.13  | 3 |
| -14 | 0  | 10  | 36.93   | 11.84 | 3 |
| -13 | 0  | 10  | 268.05  | 23.33 | 3 |
| -12 | 0  | 10  | 4.18    | 6.30  | 3 |
| 11  | 0  | -10 | 231.86  | 16.84 | 1 |
| -11 | 0  | 10  | 182.73  | 18.61 | 3 |
| 10  | 0  | -10 | 17.68   | 6.67  | 1 |
| -10 | 0  | 10  | 12.46   | 6.85  | 3 |
| -9  | 0  | 10  | 905.45  | 40.69 | 3 |
| 9   | 0  | -10 | 814.60  | 36.44 | 1 |
| -8  | 0  | 10  | 67.22   | 10.92 | 3 |
| 8   | 0  | -10 | 46.27   | 8.96  | 1 |
| 7   | 0  | -10 | -2.48   | 3.09  | 1 |
| -7  | 0  | 10  | -0.66   | 3.06  | 3 |
| -6  | 0  | 10  | 940.88  | 40.87 | 3 |
| 6   | 0  | -10 | 963.54  | 39.40 | 1 |
| -5  | 0  | 10  | 615.87  | 30.35 | 3 |
| 5   | 0  | -10 | 547.37  | 27.01 | 1 |
| 4   | 0  | -10 | 830.82  | 34.91 | 1 |
| 3   | 0  | -10 | 553.60  | 21.89 | 2 |

|     |    |     |         |       |   |
|-----|----|-----|---------|-------|---|
| 3   | 0  | -10 | 549.43  | 26.06 | 1 |
| 2   | 0  | -10 | -0.29   | 2.40  | 2 |
| 2   | 0  | -10 | -1.95   | 3.10  | 1 |
| 1   | 0  | -10 | 158.18  | 12.64 | 1 |
| 1   | 0  | -10 | 171.34  | 11.80 | 2 |
| 0   | 0  | -10 | 561.39  | 25.62 | 2 |
| -1  | 0  | -10 | 11.17   | 4.17  | 1 |
| -1  | 0  | -10 | 0.26    | 3.57  | 2 |
| -2  | 0  | -10 | 234.50  | 17.05 | 2 |
| -2  | 0  | -10 | 269.25  | 16.36 | 1 |
| -3  | 0  | -10 | 68.59   | 9.08  | 1 |
| -3  | 0  | -10 | 74.01   | 11.24 | 2 |
| -4  | 0  | -10 | 19.87   | 7.10  | 2 |
| -4  | 0  | -10 | 26.72   | 6.29  | 1 |
| -5  | 0  | -10 | 102.43  | 14.77 | 2 |
| -6  | 0  | -10 | 15.53   | 6.93  | 2 |
| -7  | 0  | -10 | 242.04  | 23.73 | 2 |
| -8  | 0  | -10 | -0.67   | 6.54  | 2 |
| -9  | 0  | -10 | 33.71   | 11.82 | 2 |
| -10 | 0  | -10 | 57.08   | 14.51 | 2 |
| -11 | 0  | -10 | -12.47  | 5.25  | 2 |
| -17 | 1  | 10  | 5.99    | 10.35 | 3 |
| -16 | 1  | 10  | 3.35    | 9.43  | 3 |
| -15 | 1  | 10  | 602.07  | 38.92 | 3 |
| -14 | 1  | 10  | 244.68  | 24.44 | 3 |
| -13 | 1  | 10  | 0.36    | 6.95  | 3 |
| -12 | 1  | 10  | 25.09   | 8.89  | 3 |
| -11 | 1  | 10  | 4.67    | 5.65  | 3 |
| 11  | -1 | -10 | 7.51    | 4.31  | 1 |
| -10 | 1  | 10  | 512.03  | 29.88 | 3 |
| 10  | -1 | -10 | 552.03  | 27.78 | 1 |
| -9  | 1  | 10  | 70.35   | 12.09 | 3 |
| 9   | -1 | -10 | 98.30   | 11.61 | 1 |
| 8   | -1 | -10 | 326.86  | 20.44 | 1 |
| -8  | 1  | 10  | 361.82  | 22.80 | 3 |
| -7  | 1  | 10  | 135.29  | 14.66 | 3 |
| 7   | -1 | -10 | 154.19  | 13.50 | 1 |
| 6   | -1 | -10 | 76.63   | 10.51 | 1 |
| -6  | 1  | 10  | 78.16   | 11.61 | 3 |
| 5   | -1 | -10 | 12.52   | 5.23  | 1 |
| -5  | 1  | 10  | 9.04    | 5.85  | 3 |
| 4   | -1 | -10 | 40.26   | 8.13  | 1 |
| 4   | -1 | -10 | 41.69   | 5.33  | 2 |
| 3   | -1 | -10 | 399.55  | 21.88 | 1 |
| 3   | -1 | -10 | 396.11  | 18.25 | 2 |
| 2   | -1 | -10 | 2072.14 | 69.92 | 1 |

|     |    |     |         |       |   |
|-----|----|-----|---------|-------|---|
| 2   | -1 | -10 | 2085.46 | 67.52 | 2 |
| 1   | -1 | -10 | 50.12   | 7.69  | 2 |
| 1   | -1 | -10 | 37.75   | 7.43  | 1 |
| 0   | -1 | -10 | 243.43  | 15.84 | 2 |
| 0   | -1 | -10 | 235.56  | 15.77 | 1 |
| -1  | -1 | -10 | 65.22   | 10.11 | 2 |
| -1  | -1 | -10 | 63.83   | 9.18  | 1 |
| -2  | -1 | -10 | 2.10    | 3.36  | 1 |
| -2  | -1 | -10 | 4.76    | 4.18  | 2 |
| -3  | -1 | -10 | 57.70   | 10.83 | 2 |
| -3  | -1 | -10 | 58.81   | 8.84  | 1 |
| -4  | -1 | -10 | -1.64   | 3.85  | 1 |
| -4  | -1 | -10 | -1.77   | 4.15  | 2 |
| -5  | -1 | -10 | 10.15   | 6.25  | 2 |
| -6  | -1 | -10 | 100.84  | 16.08 | 2 |
| -7  | -1 | -10 | 99.01   | 16.62 | 2 |
| -8  | -1 | -10 | 7.83    | 7.81  | 2 |
| -9  | -1 | -10 | 2.54    | 7.16  | 2 |
| -10 | -1 | -10 | 0.54    | 6.58  | 2 |
| -11 | -1 | -10 | -2.55   | 7.13  | 2 |
| -17 | 2  | 10  | 55.59   | 16.29 | 3 |
| -16 | 2  | 10  | 12.07   | 9.63  | 3 |
| -15 | 2  | 10  | 75.19   | 16.01 | 3 |
| -14 | 2  | 10  | 9.14    | 7.50  | 3 |
| -13 | 2  | 10  | 19.57   | 8.41  | 3 |
| -12 | 2  | 10  | 19.37   | 7.92  | 3 |
| -11 | 2  | 10  | 29.78   | 9.06  | 3 |
| 11  | -2 | -10 | 28.82   | 7.59  | 1 |
| -10 | 2  | 10  | 32.62   | 9.17  | 3 |
| 10  | -2 | -10 | 15.76   | 5.99  | 1 |
| 9   | -2 | -10 | 199.26  | 15.58 | 1 |
| -9  | 2  | 10  | 196.43  | 17.20 | 3 |
| -8  | 2  | 10  | 194.68  | 16.55 | 3 |
| 8   | -2 | -10 | 179.20  | 14.71 | 1 |
| 7   | -2 | -10 | 15.73   | 5.81  | 1 |
| -7  | 2  | 10  | 14.41   | 6.30  | 3 |
| -6  | 2  | 10  | 602.24  | 31.69 | 3 |
| 6   | -2 | -10 | 651.55  | 30.15 | 1 |
| -5  | 2  | 10  | -2.69   | 3.61  | 3 |
| 5   | -2 | -10 | -0.53   | 3.66  | 1 |
| 4   | -2 | -10 | 6.11    | 4.49  | 1 |
| 4   | -2 | -10 | 7.44    | 3.59  | 2 |
| 3   | -2 | -10 | 1613.41 | 57.82 | 1 |
| 3   | -2 | -10 | 1612.90 | 54.22 | 2 |
| 2   | -2 | -10 | 657.08  | 27.88 | 2 |
| 2   | -2 | -10 | 650.02  | 29.92 | 1 |



|     |    |     |         |       |   |
|-----|----|-----|---------|-------|---|
| 1   | -2 | -10 | 128.69  | 12.27 | 1 |
| 0   | -2 | -10 | 297.64  | 18.39 | 1 |
| 0   | -2 | -10 | 352.32  | 20.78 | 2 |
| -1  | -2 | -10 | 265.61  | 18.84 | 2 |
| -1  | -2 | -10 | 268.22  | 17.17 | 1 |
| -2  | -2 | -10 | 74.90   | 11.73 | 2 |
| -2  | -2 | -10 | 86.69   | 10.39 | 1 |
| -3  | -2 | -10 | 9.20    | 5.65  | 2 |
| -3  | -2 | -10 | 11.67   | 5.13  | 1 |
| -4  | -2 | -10 | 215.94  | 20.84 | 2 |
| -4  | -2 | -10 | 206.80  | 14.90 | 1 |
| -5  | -2 | -10 | 89.09   | 14.99 | 2 |
| -6  | -2 | -10 | 229.03  | 23.42 | 2 |
| -7  | -2 | -10 | 17.13   | 8.98  | 2 |
| -8  | -2 | -10 | -5.26   | 6.07  | 2 |
| -9  | -2 | -10 | 60.40   | 15.31 | 2 |
| -10 | -2 | -10 | 2.45    | 7.05  | 2 |
| -17 | 3  | 10  | 1.47    | 6.49  | 3 |
| -16 | 3  | 10  | 8.82    | 8.24  | 3 |
| -15 | 3  | 10  | 34.74   | 11.79 | 3 |
| -14 | 3  | 10  | 44.75   | 12.56 | 3 |
| -13 | 3  | 10  | 57.91   | 12.72 | 3 |
| -12 | 3  | 10  | 709.63  | 38.21 | 3 |
| -11 | 3  | 10  | 60.07   | 12.74 | 3 |
| 11  | -3 | -10 | 78.74   | 11.13 | 1 |
| -10 | 3  | 10  | 77.54   | 13.25 | 3 |
| 10  | -3 | -10 | 58.24   | 10.36 | 1 |
| 9   | -3 | -10 | 88.03   | 11.70 | 1 |
| -9  | 3  | 10  | 87.59   | 13.18 | 3 |
| -8  | 3  | 10  | 147.60  | 16.31 | 3 |
| 8   | -3 | -10 | 161.61  | 14.18 | 1 |
| -7  | 3  | 10  | 191.54  | 17.24 | 3 |
| 7   | -3 | -10 | 257.15  | 17.73 | 1 |
| 6   | -3 | -10 | 50.02   | 8.68  | 1 |
| -6  | 3  | 10  | 74.27   | 12.57 | 3 |
| 5   | -3 | -10 | 1358.92 | 51.56 | 1 |
| 4   | -3 | -10 | 275.86  | 17.94 | 1 |
| 3   | -3 | -10 | 72.68   | 10.29 | 1 |
| 2   | -3 | -10 | 266.03  | 16.62 | 2 |
| 2   | -3 | -10 | 269.24  | 18.09 | 1 |
| 1   | -3 | -10 | 247.07  | 17.06 | 2 |
| 1   | -3 | -10 | 301.24  | 18.77 | 1 |
| 0   | -3 | -10 | 178.47  | 14.13 | 1 |
| 0   | -3 | -10 | 159.21  | 13.97 | 2 |
| -1  | -3 | -10 | 160.88  | 13.43 | 1 |
| -1  | -3 | -10 | 144.85  | 15.55 | 2 |

|     |    |     |        |       |   |
|-----|----|-----|--------|-------|---|
| -2  | -3 | -10 | 4.11   | 3.67  | 1 |
| -2  | -3 | -10 | -4.08  | 4.38  | 2 |
| -3  | -3 | -10 | 38.73  | 9.89  | 2 |
| -3  | -3 | -10 | 40.83  | 8.12  | 1 |
| -4  | -3 | -10 | 110.32 | 16.24 | 2 |
| -4  | -3 | -10 | 102.33 | 11.90 | 1 |
| -5  | -3 | -10 | 15.71  | 8.32  | 2 |
| -6  | -3 | -10 | 179.67 | 21.81 | 2 |
| -7  | -3 | -10 | 82.14  | 17.15 | 2 |
| -8  | -3 | -10 | 340.64 | 29.10 | 2 |
| -9  | -3 | -10 | 4.79   | 8.51  | 2 |
| -10 | -3 | -10 | -0.94  | 6.45  | 2 |
| -17 | 4  | 10  | 1.71   | 6.59  | 3 |
| -16 | 4  | 10  | 39.23  | 12.39 | 3 |
| -15 | 4  | 10  | 3.93   | 7.35  | 3 |
| -14 | 4  | 10  | 113.81 | 18.28 | 3 |
| -13 | 4  | 10  | 99.08  | 16.44 | 3 |
| -12 | 4  | 10  | 23.57  | 8.99  | 3 |
| 12  | -4 | -10 | 22.60  | 7.65  | 1 |
| 11  | -4 | -10 | 338.21 | 21.27 | 1 |
| -11 | 4  | 10  | 292.63 | 22.93 | 3 |
| 10  | -4 | -10 | 178.28 | 15.58 | 1 |
| -10 | 4  | 10  | 167.28 | 18.00 | 3 |
| -9  | 4  | 10  | 2.98   | 6.24  | 3 |
| 9   | -4 | -10 | 4.63   | 4.78  | 1 |
| -8  | 4  | 10  | 79.25  | 13.38 | 3 |
| 8   | -4 | -10 | 85.12  | 11.60 | 1 |
| -7  | 4  | 10  | -0.57  | 5.58  | 3 |
| 7   | -4 | -10 | -2.16  | 3.80  | 1 |
| -6  | 4  | 10  | 6.88   | 6.61  | 3 |
| 6   | -4 | -10 | 0.31   | 3.46  | 1 |
| 5   | -4 | -10 | 349.00 | 21.32 | 1 |
| 4   | -4 | -10 | 2.53   | 4.14  | 1 |
| 3   | -4 | -10 | 74.22  | 10.91 | 1 |
| 2   | -4 | -10 | 419.32 | 23.85 | 1 |
| 1   | -4 | -10 | 525.51 | 27.53 | 2 |
| 1   | -4 | -10 | 547.36 | 27.67 | 1 |
| 0   | -4 | -10 | 38.93  | 8.69  | 2 |
| 0   | -4 | -10 | 47.38  | 8.85  | 1 |
| -1  | -4 | -10 | -0.32  | 3.73  | 2 |
| -1  | -4 | -10 | 3.11   | 3.46  | 1 |
| -2  | -4 | -10 | 631.26 | 31.05 | 1 |
| -2  | -4 | -10 | 653.00 | 35.05 | 2 |
| -3  | -4 | -10 | 85.46  | 11.63 | 1 |
| -3  | -4 | -10 | 83.99  | 14.98 | 2 |
| -4  | -4 | -10 | 253.80 | 21.91 | 2 |

|     |    |     |        |       |   |
|-----|----|-----|--------|-------|---|
| -5  | -4 | -10 | -2.26  | 6.05  | 2 |
| -6  | -4 | -10 | 3.81   | 7.78  | 2 |
| -7  | -4 | -10 | 181.02 | 23.93 | 2 |
| -8  | -4 | -10 | 49.37  | 13.83 | 2 |
| -9  | -4 | -10 | 6.52   | 5.98  | 2 |
| -17 | 5  | 10  | -1.54  | 6.15  | 3 |
| -16 | 5  | 10  | 13.25  | 9.28  | 3 |
| -15 | 5  | 10  | 28.25  | 10.46 | 3 |
| -14 | 5  | 10  | 33.55  | 11.57 | 3 |
| -13 | 5  | 10  | 71.32  | 14.71 | 3 |
| -12 | 5  | 10  | 12.51  | 8.07  | 3 |
| 12  | -5 | -10 | 7.85   | 5.79  | 1 |
| 11  | -5 | -10 | 4.11   | 5.13  | 1 |
| -11 | 5  | 10  | 9.14   | 6.57  | 3 |
| -10 | 5  | 10  | 288.71 | 22.85 | 3 |
| 10  | -5 | -10 | 315.64 | 21.11 | 1 |
| 9   | -5 | -10 | 1.88   | 4.35  | 1 |
| -9  | 5  | 10  | 5.84   | 6.61  | 3 |
| -8  | 5  | 10  | 5.85   | 6.85  | 3 |
| 8   | -5 | -10 | 4.57   | 5.34  | 1 |
| 7   | -5 | -10 | 428.75 | 24.51 | 1 |
| -7  | 5  | 10  | 407.68 | 27.60 | 3 |
| 6   | -5 | -10 | 332.38 | 22.14 | 1 |
| 5   | -5 | -10 | 9.69   | 6.10  | 1 |
| 4   | -5 | -10 | 182.38 | 15.64 | 1 |
| 3   | -5 | -10 | 47.81  | 9.49  | 1 |
| 2   | -5 | -10 | 275.42 | 19.41 | 1 |
| 1   | -5 | -10 | 7.68   | 4.58  | 1 |
| 0   | -5 | -10 | 24.37  | 7.11  | 1 |
| 0   | -5 | -10 | 28.34  | 8.30  | 2 |
| -1  | -5 | -10 | 8.59   | 4.74  | 1 |
| -1  | -5 | -10 | 1.26   | 4.71  | 2 |
| -2  | -5 | -10 | 31.59  | 9.45  | 2 |
| -2  | -5 | -10 | 67.63  | 11.03 | 1 |
| -3  | -5 | -10 | 54.70  | 12.77 | 2 |
| -3  | -5 | -10 | 44.84  | 9.90  | 1 |
| -4  | -5 | -10 | 6.89   | 8.21  | 2 |
| -5  | -5 | -10 | 118.05 | 19.34 | 2 |
| -6  | -5 | -10 | 341.30 | 29.17 | 2 |
| -7  | -5 | -10 | 6.78   | 8.85  | 2 |
| -8  | -5 | -10 | 2.40   | 7.28  | 2 |
| -9  | -5 | -10 | 5.11   | 7.08  | 2 |
| -17 | 6  | 10  | 3.91   | 7.46  | 3 |
| -16 | 6  | 10  | 9.88   | 8.88  | 3 |
| -15 | 6  | 10  | 51.11  | 14.59 | 3 |
| -14 | 6  | 10  | 30.35  | 11.09 | 3 |

|     |    |     |        |       |   |
|-----|----|-----|--------|-------|---|
| -13 | 6  | 10  | 79.22  | 15.19 | 3 |
| 12  | -6 | -10 | 233.54 | 18.58 | 1 |
| -12 | 6  | 10  | 200.10 | 21.54 | 3 |
| 11  | -6 | -10 | -1.40  | 5.18  | 1 |
| -11 | 6  | 10  | -2.29  | 5.62  | 3 |
| -10 | 6  | 10  | 18.78  | 8.41  | 3 |
| 10  | -6 | -10 | 19.41  | 7.79  | 1 |
| -9  | 6  | 10  | 36.15  | 11.63 | 3 |
| 9   | -6 | -10 | 35.18  | 9.39  | 1 |
| 8   | -6 | -10 | -5.83  | 4.36  | 1 |
| -8  | 6  | 10  | -3.55  | 5.63  | 3 |
| 7   | -6 | -10 | 16.04  | 6.88  | 1 |
| -7  | 6  | 10  | 28.53  | 10.14 | 3 |
| 6   | -6 | -10 | 16.97  | 6.63  | 1 |
| 5   | -6 | -10 | -1.79  | 4.79  | 1 |
| 4   | -6 | -10 | 5.16   | 4.54  | 1 |
| 3   | -6 | -10 | 6.01   | 4.57  | 1 |
| 2   | -6 | -10 | 276.50 | 19.69 | 1 |
| 1   | -6 | -10 | 296.67 | 20.77 | 1 |
| 0   | -6 | -10 | 165.03 | 16.58 | 1 |
| -1  | -6 | -10 | 27.10  | 9.03  | 2 |
| -1  | -6 | -10 | 33.83  | 8.11  | 1 |
| -2  | -6 | -10 | 7.84   | 6.95  | 2 |
| -2  | -6 | -10 | 7.87   | 5.41  | 1 |
| -3  | -6 | -10 | 9.02   | 6.17  | 1 |
| -3  | -6 | -10 | 12.30  | 7.63  | 2 |
| -4  | -6 | -10 | 14.38  | 9.17  | 2 |
| -5  | -6 | -10 | 118.04 | 19.49 | 2 |
| -6  | -6 | -10 | -1.70  | 7.02  | 2 |
| -7  | -6 | -10 | 14.81  | 9.72  | 2 |
| -8  | -6 | -10 | -5.42  | 6.23  | 2 |
| -17 | 7  | 10  | -2.88  | 6.52  | 3 |
| -16 | 7  | 10  | 24.87  | 10.74 | 3 |
| -15 | 7  | 10  | 15.36  | 9.74  | 3 |
| -14 | 7  | 10  | -1.03  | 7.34  | 3 |
| -13 | 7  | 10  | 10.28  | 8.73  | 3 |
| 12  | -7 | -10 | 60.95  | 12.05 | 1 |
| -12 | 7  | 10  | 66.56  | 14.44 | 3 |
| -11 | 7  | 10  | 102.77 | 16.45 | 3 |
| 11  | -7 | -10 | 93.94  | 13.59 | 1 |
| -10 | 7  | 10  | 39.20  | 11.26 | 3 |
| 10  | -7 | -10 | 42.33  | 10.37 | 1 |
| 9   | -7 | -10 | 32.11  | 9.34  | 1 |
| -9  | 7  | 10  | 41.35  | 11.37 | 3 |
| -8  | 7  | 10  | 219.46 | 22.08 | 3 |
| 8   | -7 | -10 | 225.69 | 18.78 | 1 |

|     |    |     |        |       |   |
|-----|----|-----|--------|-------|---|
| 7   | -7 | -10 | 46.12  | 10.81 | 1 |
| 6   | -7 | -10 | -0.36  | 5.45  | 1 |
| 5   | -7 | -10 | 67.25  | 12.29 | 1 |
| 4   | -7 | -10 | 17.84  | 6.55  | 1 |
| 3   | -7 | -10 | 7.40   | 5.21  | 1 |
| 2   | -7 | -10 | -0.38  | 4.15  | 1 |
| 1   | -7 | -10 | 51.08  | 10.68 | 1 |
| 0   | -7 | -10 | 1.88   | 5.25  | 1 |
| -1  | -7 | -10 | 12.41  | 6.32  | 1 |
| -2  | -7 | -10 | 37.01  | 10.53 | 2 |
| -2  | -7 | -10 | 22.21  | 8.27  | 1 |
| -3  | -7 | -10 | 143.98 | 16.58 | 1 |
| -3  | -7 | -10 | 144.84 | 20.13 | 2 |
| -4  | -7 | -10 | 42.34  | 12.24 | 2 |
| -5  | -7 | -10 | 11.06  | 10.09 | 2 |
| -6  | -7 | -10 | 48.61  | 14.09 | 2 |
| -7  | -7 | -10 | -2.53  | 6.21  | 2 |
| -17 | 8  | 10  | 106.72 | 20.10 | 3 |
| -16 | 8  | 10  | 10.04  | 9.57  | 3 |
| -15 | 8  | 10  | -2.28  | 7.16  | 3 |
| -14 | 8  | 10  | 68.64  | 15.24 | 3 |
| -13 | 8  | 10  | 11.94  | 8.69  | 3 |
| -12 | 8  | 10  | 162.88 | 20.48 | 3 |
| 12  | -8 | -10 | 177.36 | 17.37 | 1 |
| -11 | 8  | 10  | 26.42  | 11.41 | 3 |
| 11  | -8 | -10 | 23.07  | 8.61  | 1 |
| -10 | 8  | 10  | 33.81  | 11.07 | 3 |
| 10  | -8 | -10 | 40.01  | 10.35 | 1 |
| 9   | -8 | -10 | -2.08  | 6.03  | 1 |
| -9  | 8  | 10  | -2.64  | 6.54  | 3 |
| 8   | -8 | -10 | 13.00  | 6.99  | 1 |
| 7   | -8 | -10 | 18.09  | 7.73  | 1 |
| 6   | -8 | -10 | 9.51   | 6.84  | 1 |
| 5   | -8 | -10 | 18.44  | 8.64  | 1 |
| 4   | -8 | -10 | 247.43 | 19.74 | 1 |
| 3   | -8 | -10 | 350.73 | 24.03 | 1 |
| 2   | -8 | -10 | 7.31   | 6.24  | 1 |
| 1   | -8 | -10 | 8.18   | 6.15  | 1 |
| 0   | -8 | -10 | 14.01  | 7.01  | 1 |
| -1  | -8 | -10 | -4.58  | 4.98  | 1 |
| -2  | -8 | -10 | 3.34   | 5.30  | 1 |
| -2  | -8 | -10 | 1.16   | 6.99  | 2 |
| -3  | -8 | -10 | 16.24  | 9.53  | 2 |
| -3  | -8 | -10 | 16.08  | 8.47  | 1 |
| -4  | -8 | -10 | -3.31  | 6.54  | 2 |
| -5  | -8 | -10 | -2.96  | 8.37  | 2 |

|     |     |     |        |       |   |
|-----|-----|-----|--------|-------|---|
| -6  | -8  | -10 | 4.39   | 7.82  | 2 |
| -7  | -8  | -10 | 5.76   | 6.87  | 2 |
| -16 | 9   | 10  | 90.14  | 18.62 | 3 |
| -15 | 9   | 10  | 100.16 | 19.07 | 3 |
| -14 | 9   | 10  | 21.76  | 11.20 | 3 |
| -13 | 9   | 10  | 99.75  | 18.23 | 3 |
| 12  | -9  | -10 | 33.35  | 10.18 | 1 |
| -12 | 9   | 10  | 26.40  | 11.72 | 3 |
| -11 | 9   | 10  | 305.66 | 26.15 | 3 |
| 11  | -9  | -10 | 294.50 | 21.71 | 1 |
| 10  | -9  | -10 | 139.54 | 16.72 | 1 |
| -10 | 9   | 10  | 130.99 | 19.44 | 3 |
| 9   | -9  | -10 | 34.39  | 9.82  | 1 |
| 8   | -9  | -10 | 16.15  | 8.45  | 1 |
| 7   | -9  | -10 | 15.18  | 7.32  | 1 |
| 6   | -9  | -10 | 13.63  | 7.91  | 1 |
| 5   | -9  | -10 | 44.54  | 11.27 | 1 |
| 4   | -9  | -10 | 38.17  | 9.81  | 1 |
| 3   | -9  | -10 | 19.52  | 7.08  | 1 |
| 2   | -9  | -10 | 5.73   | 5.55  | 1 |
| 1   | -9  | -10 | 7.40   | 6.37  | 1 |
| 0   | -9  | -10 | 33.40  | 9.82  | 1 |
| -1  | -9  | -10 | 82.70  | 14.77 | 1 |
| -2  | -9  | -10 | 93.23  | 15.03 | 1 |
| -2  | -9  | -10 | 127.11 | 19.92 | 2 |
| -3  | -9  | -10 | 62.99  | 15.06 | 2 |
| -3  | -9  | -10 | 60.60  | 12.75 | 1 |
| -4  | -9  | -10 | 20.22  | 10.37 | 2 |
| -5  | -9  | -10 | -12.82 | 6.67  | 2 |
| -6  | -9  | -10 | -3.50  | 6.23  | 2 |
| -16 | 10  | 10  | 17.60  | 11.48 | 3 |
| -15 | 10  | 10  | -14.54 | 7.10  | 3 |
| -14 | 10  | 10  | 164.48 | 22.46 | 3 |
| -13 | 10  | 10  | -4.61  | 8.55  | 3 |
| 12  | -10 | -10 | 79.23  | 13.39 | 1 |
| -12 | 10  | 10  | 90.25  | 17.99 | 3 |
| 11  | -10 | -10 | 9.03   | 7.22  | 1 |
| -11 | 10  | 10  | 7.27   | 9.68  | 3 |
| -10 | 10  | 10  | 4.55   | 8.75  | 3 |
| 10  | -10 | -10 | 1.98   | 6.58  | 1 |
| 9   | -10 | -10 | 0.59   | 6.55  | 1 |
| 8   | -10 | -10 | 16.10  | 8.66  | 1 |
| 7   | -10 | -10 | 154.74 | 18.91 | 1 |
| 6   | -10 | -10 | 21.11  | 8.99  | 1 |
| 5   | -10 | -10 | 12.48  | 9.15  | 1 |
| 4   | -10 | -10 | 118.89 | 16.92 | 1 |

|     |     |     |        |       |   |
|-----|-----|-----|--------|-------|---|
| 3   | -10 | -10 | 68.42  | 13.23 | 1 |
| 2   | -10 | -10 | 5.80   | 6.19  | 1 |
| 1   | -10 | -10 | 20.19  | 8.24  | 1 |
| 0   | -10 | -10 | 4.80   | 7.13  | 1 |
| -1  | -10 | -10 | -6.55  | 6.05  | 1 |
| -2  | -10 | -10 | 22.82  | 9.25  | 1 |
| -3  | -10 | -10 | -3.56  | 7.87  | 2 |
| -3  | -10 | -10 | 0.93   | 7.11  | 1 |
| -4  | -10 | -10 | 4.77   | 7.20  | 2 |
| -5  | -10 | -10 | 8.10   | 6.41  | 2 |
| -15 | 11  | 10  | 1.44   | 8.72  | 3 |
| -14 | 11  | 10  | 1.72   | 10.09 | 3 |
| -13 | 11  | 10  | 456.61 | 34.32 | 3 |
| 12  | -11 | -10 | 70.57  | 14.05 | 1 |
| -12 | 11  | 10  | 38.15  | 13.93 | 3 |
| -11 | 11  | 10  | 9.68   | 9.96  | 3 |
| 11  | -11 | -10 | 20.83  | 9.86  | 1 |
| 10  | -11 | -10 | 0.63   | 7.51  | 1 |
| 9   | -11 | -10 | 19.72  | 9.75  | 1 |
| 8   | -11 | -10 | -0.91  | 7.10  | 1 |
| 7   | -11 | -10 | 10.73  | 8.89  | 1 |
| 6   | -11 | -10 | 83.10  | 15.75 | 1 |
| 5   | -11 | -10 | 65.88  | 14.75 | 1 |
| 4   | -11 | -10 | 84.22  | 14.75 | 1 |
| 3   | -11 | -10 | 252.30 | 21.83 | 1 |
| 2   | -11 | -10 | -0.19  | 6.56  | 1 |
| 1   | -11 | -10 | 1.88   | 6.50  | 1 |
| 0   | -11 | -10 | 89.66  | 15.39 | 1 |
| -1  | -11 | -10 | 25.23  | 9.47  | 1 |
| -2  | -11 | -10 | 17.31  | 9.27  | 1 |
| -3  | -11 | -10 | 0.76   | 7.81  | 2 |
| -3  | -11 | -10 | -8.04  | 8.27  | 1 |
| -4  | -11 | -10 | 6.85   | 8.41  | 2 |
| -15 | 12  | 10  | 50.28  | 16.27 | 3 |
| -14 | 12  | 10  | -5.66  | 9.92  | 3 |
| -13 | 12  | 10  | 56.18  | 16.90 | 3 |
| -12 | 12  | 10  | 39.57  | 15.07 | 3 |
| 12  | -12 | -10 | 48.39  | 13.08 | 1 |
| 11  | -12 | -10 | 69.76  | 14.68 | 1 |
| 10  | -12 | -10 | 18.21  | 9.63  | 1 |
| 9   | -12 | -10 | 54.13  | 13.94 | 1 |
| 8   | -12 | -10 | 2.29   | 8.54  | 1 |
| 7   | -12 | -10 | 19.55  | 9.96  | 1 |
| 6   | -12 | -10 | 561.83 | 35.25 | 1 |
| 5   | -12 | -10 | 42.81  | 13.43 | 1 |
| 4   | -12 | -10 | 104.82 | 15.89 | 1 |

|    |     |     |        |       |   |
|----|-----|-----|--------|-------|---|
| 3  | -12 | -10 | 4.78   | 7.37  | 1 |
| 2  | -12 | -10 | 89.16  | 15.81 | 1 |
| 1  | -12 | -10 | 2.97   | 7.13  | 1 |
| 0  | -12 | -10 | 6.23   | 7.44  | 1 |
| -1 | -12 | -10 | 100.58 | 17.60 | 1 |
| -2 | -12 | -10 | 29.47  | 11.39 | 1 |
| -3 | -12 | -10 | 42.08  | 12.82 | 1 |
| 12 | -13 | -10 | 39.77  | 12.03 | 1 |
| 11 | -13 | -10 | -5.22  | 7.17  | 1 |
| 10 | -13 | -10 | 11.39  | 9.11  | 1 |
| 9  | -13 | -10 | -1.47  | 8.39  | 1 |
| 8  | -13 | -10 | 116.03 | 18.39 | 1 |
| 7  | -13 | -10 | -2.72  | 8.66  | 1 |
| 6  | -13 | -10 | 62.46  | 14.90 | 1 |
| 5  | -13 | -10 | -1.19  | 8.35  | 1 |
| 4  | -13 | -10 | 51.77  | 12.36 | 1 |
| 3  | -13 | -10 | 222.60 | 24.09 | 1 |
| 2  | -13 | -10 | 77.12  | 15.78 | 1 |
| 1  | -13 | -10 | 2.69   | 7.67  | 1 |
| 0  | -13 | -10 | 1.17   | 7.64  | 1 |
| -1 | -13 | -10 | 25.92  | 12.17 | 1 |
| 11 | -14 | -10 | -1.40  | 8.87  | 1 |
| 10 | -14 | -10 | 3.35   | 8.52  | 1 |
| 9  | -14 | -10 | -4.50  | 8.13  | 1 |
| 8  | -14 | -10 | 48.94  | 13.72 | 1 |
| 7  | -14 | -10 | 19.73  | 11.31 | 1 |
| 6  | -14 | -10 | 9.37   | 9.42  | 1 |
| 5  | -14 | -10 | 19.40  | 11.18 | 1 |
| 4  | -14 | -10 | 63.49  | 15.27 | 1 |
| 3  | -14 | -10 | 15.91  | 10.69 | 1 |
| 2  | -14 | -10 | 36.72  | 13.21 | 1 |
| 1  | -14 | -10 | 62.36  | 15.88 | 1 |
| 0  | -14 | -10 | 22.65  | 12.78 | 1 |
| 11 | -15 | -10 | 21.40  | 11.88 | 1 |
| 10 | -15 | -10 | 82.72  | 16.67 | 1 |
| 9  | -15 | -10 | 2.20   | 9.27  | 1 |
| 8  | -15 | -10 | -11.06 | 7.37  | 1 |
| 7  | -15 | -10 | 0.43   | 7.95  | 1 |
| 6  | -15 | -10 | 4.98   | 8.01  | 1 |
| 5  | -15 | -10 | 4.11   | 8.45  | 1 |
| 4  | -15 | -10 | 14.33  | 11.49 | 1 |
| 3  | -15 | -10 | -10.05 | 7.97  | 1 |
| 1  | 19  | -11 | 15.25  | 8.93  | 1 |
| 0  | 19  | -11 | 1.37   | 6.97  | 1 |
| -1 | 19  | -11 | 15.35  | 9.19  | 1 |
| -1 | 19  | -11 | -10.48 | 8.44  | 2 |



|    |    |     |        |       |   |
|----|----|-----|--------|-------|---|
| -2 | 19 | -11 | 106.14 | 17.40 | 1 |
| -2 | 19 | -11 | 107.54 | 19.03 | 2 |
| -3 | 19 | -11 | 58.56  | 12.39 | 1 |
| -3 | 19 | -11 | 67.92  | 15.23 | 2 |
| -4 | 19 | -11 | 5.58   | 8.46  | 2 |
| -4 | 19 | -11 | 4.90   | 7.35  | 1 |
| -5 | 19 | -11 | 4.64   | 8.77  | 2 |
| 4  | 18 | -11 | 10.20  | 6.60  | 1 |
| 3  | 18 | -11 | 5.85   | 7.19  | 1 |
| 2  | 18 | -11 | 3.29   | 7.27  | 1 |
| 1  | 18 | -11 | 10.22  | 7.17  | 1 |
| 0  | 18 | -11 | 21.25  | 8.25  | 1 |
| -1 | 18 | -11 | 36.10  | 10.18 | 1 |
| -1 | 18 | -11 | 20.16  | 10.31 | 2 |
| -2 | 18 | -11 | 14.14  | 9.42  | 2 |
| -2 | 18 | -11 | 14.49  | 7.43  | 1 |
| -3 | 18 | -11 | 8.17   | 6.85  | 1 |
| -3 | 18 | -11 | -5.08  | 7.88  | 2 |
| -4 | 18 | -11 | 8.08   | 8.63  | 2 |
| -4 | 18 | -11 | 3.42   | 6.40  | 1 |
| -5 | 18 | -11 | 96.40  | 18.35 | 2 |
| -6 | 18 | -11 | 116.61 | 20.19 | 2 |
| -7 | 18 | -11 | -9.37  | 8.48  | 2 |
| 6  | 17 | -11 | 1.57   | 6.50  | 1 |
| 5  | 17 | -11 | 1.43   | 6.07  | 1 |
| 4  | 17 | -11 | -0.16  | 6.58  | 1 |
| 3  | 17 | -11 | 56.43  | 13.82 | 1 |
| 2  | 17 | -11 | -9.11  | 5.10  | 1 |
| 1  | 17 | -11 | 30.33  | 10.00 | 1 |
| 0  | 17 | -11 | 90.88  | 15.37 | 1 |
| -1 | 17 | -11 | 6.53   | 9.25  | 2 |
| -1 | 17 | -11 | 12.15  | 6.79  | 1 |
| -2 | 17 | -11 | 97.05  | 17.11 | 2 |
| -2 | 17 | -11 | 66.63  | 12.46 | 1 |
| -3 | 17 | -11 | -1.09  | 4.65  | 1 |
| -3 | 17 | -11 | 1.83   | 8.56  | 2 |
| -4 | 17 | -11 | 1.43   | 7.54  | 2 |
| -4 | 17 | -11 | 5.25   | 5.21  | 1 |
| -5 | 17 | -11 | -6.62  | 7.06  | 2 |
| -6 | 17 | -11 | 4.33   | 8.13  | 2 |
| -7 | 17 | -11 | 113.64 | 20.12 | 2 |
| -8 | 17 | -11 | 2.15   | 6.80  | 2 |
| 7  | 16 | -11 | -5.54  | 6.32  | 1 |
| 6  | 16 | -11 | -3.53  | 6.60  | 1 |
| 5  | 16 | -11 | 0.23   | 7.44  | 1 |
| 4  | 16 | -11 | 25.32  | 10.14 | 1 |

|     |    |     |        |       |   |
|-----|----|-----|--------|-------|---|
| 3   | 16 | -11 | 3.37   | 5.94  | 1 |
| 2   | 16 | -11 | 38.52  | 10.14 | 1 |
| 1   | 16 | -11 | 10.64  | 5.59  | 1 |
| 0   | 16 | -11 | -0.66  | 7.62  | 2 |
| 0   | 16 | -11 | 10.26  | 6.12  | 1 |
| -1  | 16 | -11 | -11.81 | 6.59  | 2 |
| -1  | 16 | -11 | 7.59   | 5.68  | 1 |
| -2  | 16 | -11 | -0.99  | 6.79  | 2 |
| -2  | 16 | -11 | -4.44  | 4.82  | 1 |
| -3  | 16 | -11 | 139.99 | 16.42 | 1 |
| -3  | 16 | -11 | 113.65 | 17.65 | 2 |
| -4  | 16 | -11 | 94.62  | 16.46 | 2 |
| -4  | 16 | -11 | 116.94 | 15.11 | 1 |
| -5  | 16 | -11 | -0.59  | 8.10  | 2 |
| -6  | 16 | -11 | -7.26  | 6.83  | 2 |
| -7  | 16 | -11 | 130.43 | 21.40 | 2 |
| -8  | 16 | -11 | -4.24  | 9.66  | 2 |
| -9  | 16 | -11 | 2.82   | 6.81  | 2 |
| 8   | 15 | -11 | 10.68  | 8.76  | 1 |
| 7   | 15 | -11 | 0.44   | 7.22  | 1 |
| 6   | 15 | -11 | 4.40   | 7.84  | 1 |
| 5   | 15 | -11 | -5.91  | 7.22  | 1 |
| 4   | 15 | -11 | 95.24  | 16.07 | 1 |
| 3   | 15 | -11 | 90.24  | 14.75 | 1 |
| 2   | 15 | -11 | 57.19  | 11.23 | 1 |
| 1   | 15 | -11 | 17.01  | 7.07  | 1 |
| 0   | 15 | -11 | 4.52   | 4.99  | 1 |
| 0   | 15 | -11 | -2.87  | 6.03  | 2 |
| -1  | 15 | -11 | 23.23  | 8.73  | 2 |
| -1  | 15 | -11 | 20.97  | 8.05  | 1 |
| -2  | 15 | -11 | -1.11  | 4.60  | 1 |
| -2  | 15 | -11 | 4.70   | 6.82  | 2 |
| -3  | 15 | -11 | 2.06   | 4.39  | 1 |
| -3  | 15 | -11 | -7.16  | 6.42  | 2 |
| -4  | 15 | -11 | 97.54  | 13.45 | 1 |
| -4  | 15 | -11 | 86.21  | 15.81 | 2 |
| -5  | 15 | -11 | 51.52  | 13.30 | 2 |
| -6  | 15 | -11 | 70.26  | 15.87 | 2 |
| -7  | 15 | -11 | 39.47  | 12.07 | 2 |
| -8  | 15 | -11 | 2.09   | 7.87  | 2 |
| -9  | 15 | -11 | -6.15  | 6.22  | 2 |
| -10 | 15 | -11 | -1.23  | 5.41  | 2 |
| 10  | 14 | -11 | 77.62  | 15.09 | 1 |
| 9   | 14 | -11 | 4.98   | 8.34  | 1 |
| 8   | 14 | -11 | 15.73  | 9.82  | 1 |
| 7   | 14 | -11 | 15.56  | 8.54  | 1 |

|     |    |     |        |       |   |
|-----|----|-----|--------|-------|---|
| 6   | 14 | -11 | 14.87  | 9.29  | 1 |
| 5   | 14 | -11 | -1.36  | 7.15  | 1 |
| 4   | 14 | -11 | 30.69  | 10.43 | 1 |
| 3   | 14 | -11 | 96.74  | 15.54 | 1 |
| 2   | 14 | -11 | 38.39  | 9.84  | 1 |
| 1   | 14 | -11 | 18.23  | 6.90  | 1 |
| 0   | 14 | -11 | 196.85 | 19.05 | 1 |
| 0   | 14 | -11 | 181.47 | 18.49 | 2 |
| -1  | 14 | -11 | 58.21  | 12.27 | 2 |
| -1  | 14 | -11 | 38.30  | 9.26  | 1 |
| -2  | 14 | -11 | 13.03  | 7.72  | 2 |
| -2  | 14 | -11 | 13.84  | 5.47  | 1 |
| -3  | 14 | -11 | 56.43  | 12.14 | 2 |
| -3  | 14 | -11 | 65.09  | 11.41 | 1 |
| -4  | 14 | -11 | 5.89   | 7.45  | 2 |
| -4  | 14 | -11 | 13.51  | 6.52  | 1 |
| -5  | 14 | -11 | 12.87  | 9.17  | 2 |
| -6  | 14 | -11 | 2.77   | 7.23  | 2 |
| -7  | 14 | -11 | 17.45  | 9.41  | 2 |
| -8  | 14 | -11 | -1.56  | 7.82  | 2 |
| -9  | 14 | -11 | 39.26  | 12.05 | 2 |
| -10 | 14 | -11 | -0.98  | 6.65  | 2 |
| 10  | 13 | -11 | 12.60  | 9.68  | 1 |
| 9   | 13 | -11 | -4.03  | 6.64  | 1 |
| 8   | 13 | -11 | -0.76  | 7.39  | 1 |
| 7   | 13 | -11 | 114.19 | 17.97 | 1 |
| 6   | 13 | -11 | 149.52 | 19.43 | 1 |
| 5   | 13 | -11 | 1.28   | 7.09  | 1 |
| 4   | 13 | -11 | 19.05  | 8.24  | 1 |
| 3   | 13 | -11 | 70.33  | 12.75 | 1 |
| 2   | 13 | -11 | 37.40  | 8.74  | 1 |
| 1   | 13 | -11 | 6.75   | 5.98  | 2 |
| 1   | 13 | -11 | 3.86   | 4.38  | 1 |
| 0   | 13 | -11 | 81.44  | 12.85 | 1 |
| 0   | 13 | -11 | 73.51  | 12.29 | 2 |
| -1  | 13 | -11 | 71.20  | 12.41 | 2 |
| -1  | 13 | -11 | 37.35  | 8.80  | 1 |
| -2  | 13 | -11 | 13.58  | 7.43  | 2 |
| -2  | 13 | -11 | 7.78   | 4.61  | 1 |
| -3  | 13 | -11 | 85.34  | 14.38 | 2 |
| -3  | 13 | -11 | 103.78 | 12.95 | 1 |
| -4  | 13 | -11 | 144.25 | 14.71 | 1 |
| -4  | 13 | -11 | 137.92 | 18.09 | 2 |
| -5  | 13 | -11 | -0.72  | 5.82  | 2 |
| -6  | 13 | -11 | 42.03  | 12.09 | 2 |
| -7  | 13 | -11 | 66.92  | 14.90 | 2 |

|     |    |     |        |       |   |
|-----|----|-----|--------|-------|---|
| -8  | 13 | -11 | 80.84  | 16.45 | 2 |
| -9  | 13 | -11 | 57.99  | 14.71 | 2 |
| -10 | 13 | -11 | 1.67   | 6.32  | 2 |
| -11 | 13 | -11 | -3.81  | 5.73  | 2 |
| 11  | 12 | -11 | 2.02   | 7.76  | 1 |
| 10  | 12 | -11 | 40.01  | 11.99 | 1 |
| 9   | 12 | -11 | 53.79  | 13.08 | 1 |
| 8   | 12 | -11 | 11.15  | 8.59  | 1 |
| 7   | 12 | -11 | -1.76  | 7.57  | 1 |
| 6   | 12 | -11 | 268.54 | 22.76 | 1 |
| 5   | 12 | -11 | 298.21 | 23.52 | 1 |
| 4   | 12 | -11 | 3.14   | 5.77  | 1 |
| 3   | 12 | -11 | 25.23  | 7.90  | 1 |
| 2   | 12 | -11 | 56.30  | 10.95 | 1 |
| 1   | 12 | -11 | 98.11  | 13.41 | 1 |
| 0   | 12 | -11 | 135.79 | 15.07 | 1 |
| 0   | 12 | -11 | 149.10 | 15.02 | 2 |
| -1  | 12 | -11 | 13.11  | 5.31  | 1 |
| -1  | 12 | -11 | 13.37  | 6.78  | 2 |
| -2  | 12 | -11 | -0.40  | 3.74  | 1 |
| -2  | 12 | -11 | -1.66  | 5.03  | 2 |
| -3  | 12 | -11 | 12.99  | 7.78  | 2 |
| -3  | 12 | -11 | 25.10  | 7.21  | 1 |
| -4  | 12 | -11 | 3.60   | 6.42  | 2 |
| -4  | 12 | -11 | 3.03   | 4.36  | 1 |
| -5  | 12 | -11 | 0.53   | 5.16  | 2 |
| -6  | 12 | -11 | 17.10  | 9.32  | 2 |
| -7  | 12 | -11 | 93.74  | 16.72 | 2 |
| -8  | 12 | -11 | 35.19  | 11.57 | 2 |
| -9  | 12 | -11 | 24.71  | 10.25 | 2 |
| -10 | 12 | -11 | 2.45   | 7.19  | 2 |
| -11 | 12 | -11 | -7.69  | 5.35  | 2 |
| 11  | 11 | -11 | 77.46  | 15.79 | 1 |
| 10  | 11 | -11 | 1.33   | 7.23  | 1 |
| 9   | 11 | -11 | 171.28 | 19.85 | 1 |
| 8   | 11 | -11 | 9.86   | 7.70  | 1 |
| 7   | 11 | -11 | -2.04  | 5.95  | 1 |
| 6   | 11 | -11 | 48.02  | 11.23 | 1 |
| 5   | 11 | -11 | 24.71  | 8.95  | 1 |
| 4   | 11 | -11 | -2.26  | 4.77  | 1 |
| 3   | 11 | -11 | 26.25  | 7.54  | 1 |
| 2   | 11 | -11 | 56.83  | 10.65 | 1 |
| 1   | 11 | -11 | 57.91  | 10.27 | 1 |
| 1   | 11 | -11 | 45.07  | 8.77  | 2 |
| 0   | 11 | -11 | 11.08  | 4.52  | 2 |
| 0   | 11 | -11 | 20.98  | 6.69  | 1 |

|     |    |     |        |       |   |
|-----|----|-----|--------|-------|---|
| -1  | 11 | -11 | 94.05  | 12.79 | 2 |
| -1  | 11 | -11 | 100.82 | 12.41 | 1 |
| -2  | 11 | -11 | 19.38  | 5.87  | 1 |
| -2  | 11 | -11 | 50.79  | 10.70 | 2 |
| -3  | 11 | -11 | 53.09  | 11.37 | 2 |
| -3  | 11 | -11 | 62.71  | 9.61  | 1 |
| -4  | 11 | -11 | 179.68 | 19.15 | 2 |
| -4  | 11 | -11 | 183.73 | 14.58 | 1 |
| -5  | 11 | -11 | 9.22   | 6.92  | 2 |
| -6  | 11 | -11 | 0.83   | 5.93  | 2 |
| -7  | 11 | -11 | 65.69  | 14.48 | 2 |
| -8  | 11 | -11 | 8.60   | 8.45  | 2 |
| -9  | 11 | -11 | -3.51  | 7.01  | 2 |
| -10 | 11 | -11 | 0.14   | 6.77  | 2 |
| -11 | 11 | -11 | -2.39  | 4.89  | 2 |
| 11  | 10 | -11 | 133.85 | 18.63 | 1 |
| 10  | 10 | -11 | 0.60   | 6.95  | 1 |
| 9   | 10 | -11 | 15.73  | 8.69  | 1 |
| 8   | 10 | -11 | 89.40  | 15.01 | 1 |
| 7   | 10 | -11 | 125.96 | 16.50 | 1 |
| 6   | 10 | -11 | 55.43  | 11.26 | 1 |
| 5   | 10 | -11 | 0.86   | 5.56  | 1 |
| 4   | 10 | -11 | 38.30  | 9.63  | 1 |
| 3   | 10 | -11 | 152.64 | 15.92 | 1 |
| 2   | 10 | -11 | 645.46 | 32.76 | 1 |
| 1   | 10 | -11 | 82.32  | 10.24 | 2 |
| 1   | 10 | -11 | 102.62 | 12.96 | 1 |
| 0   | 10 | -11 | 59.71  | 10.15 | 1 |
| -1  | 10 | -11 | 490.12 | 25.76 | 1 |
| -1  | 10 | -11 | 433.93 | 24.28 | 2 |
| -2  | 10 | -11 | 41.21  | 9.41  | 2 |
| -2  | 10 | -11 | 55.77  | 9.34  | 1 |
| -3  | 10 | -11 | -0.61  | 4.78  | 2 |
| -3  | 10 | -11 | -2.49  | 3.20  | 1 |
| -4  | 10 | -11 | 4.02   | 5.69  | 2 |
| -4  | 10 | -11 | -3.24  | 3.35  | 1 |
| -5  | 10 | -11 | 394.95 | 26.91 | 2 |
| -6  | 10 | -11 | 39.02  | 10.83 | 2 |
| -7  | 10 | -11 | 16.73  | 8.58  | 2 |
| -8  | 10 | -11 | 16.85  | 8.69  | 2 |
| -9  | 10 | -11 | 9.57   | 8.24  | 2 |
| -10 | 10 | -11 | 49.89  | 14.33 | 2 |
| -11 | 10 | -11 | -0.83  | 5.34  | 2 |
| 11  | 9  | -11 | 227.86 | 21.99 | 1 |
| 10  | 9  | -11 | 20.16  | 9.60  | 1 |
| 9   | 9  | -11 | 42.22  | 11.33 | 1 |

|     |       |        |       |   |
|-----|-------|--------|-------|---|
| 8   | 9 -11 | 452.22 | 28.06 | 1 |
| 7   | 9 -11 | 2.66   | 5.74  | 1 |
| 6   | 9 -11 | 620.45 | 33.36 | 1 |
| 5   | 9 -11 | 178.38 | 17.79 | 1 |
| 4   | 9 -11 | 332.79 | 22.71 | 1 |
| 3   | 9 -11 | 3.72   | 4.36  | 1 |
| 2   | 9 -11 | 6.46   | 3.93  | 1 |
| 1   | 9 -11 | 334.96 | 20.84 | 1 |
| 1   | 9 -11 | 313.71 | 18.06 | 2 |
| 0   | 9 -11 | 8.04   | 5.11  | 2 |
| 0   | 9 -11 | 15.18  | 5.58  | 1 |
| -1  | 9 -11 | 255.80 | 17.43 | 1 |
| -1  | 9 -11 | 269.78 | 17.93 | 2 |
| -2  | 9 -11 | 281.71 | 17.90 | 1 |
| -2  | 9 -11 | 263.79 | 18.51 | 2 |
| -3  | 9 -11 | 197.58 | 16.89 | 2 |
| -3  | 9 -11 | 185.58 | 14.28 | 1 |
| -4  | 9 -11 | 22.12  | 8.22  | 2 |
| -4  | 9 -11 | 23.51  | 6.29  | 1 |
| -5  | 9 -11 | 141.50 | 17.34 | 2 |
| -6  | 9 -11 | 5.64   | 5.49  | 2 |
| -7  | 9 -11 | 22.30  | 8.86  | 2 |
| -8  | 9 -11 | 103.72 | 17.27 | 2 |
| -9  | 9 -11 | 0.04   | 7.07  | 2 |
| -10 | 9 -11 | -5.87  | 5.69  | 2 |
| -11 | 9 -11 | -3.66  | 6.32  | 2 |
| -12 | 9 -11 | -1.49  | 5.01  | 2 |
| 11  | 8 -11 | 304.32 | 23.71 | 1 |
| 10  | 8 -11 | 288.51 | 22.26 | 1 |
| 9   | 8 -11 | 10.85  | 6.79  | 1 |
| 8   | 8 -11 | 0.07   | 5.89  | 1 |
| 7   | 8 -11 | 95.09  | 13.92 | 1 |
| 6   | 8 -11 | 4.64   | 5.94  | 1 |
| 5   | 8 -11 | 539.85 | 29.97 | 1 |
| 4   | 8 -11 | 136.16 | 15.22 | 1 |
| 3   | 8 -11 | 136.16 | 14.31 | 1 |
| 2   | 8 -11 | 184.91 | 15.27 | 1 |
| 1   | 8 -11 | 180.61 | 12.64 | 2 |
| 1   | 8 -11 | 191.12 | 14.86 | 1 |
| 0   | 8 -11 | 19.71  | 5.62  | 2 |
| 0   | 8 -11 | 22.04  | 6.47  | 1 |
| -1  | 8 -11 | 283.53 | 17.74 | 1 |
| -1  | 8 -11 | 247.53 | 16.99 | 2 |
| -2  | 8 -11 | 603.71 | 28.83 | 1 |
| -2  | 8 -11 | 659.35 | 31.58 | 2 |
| -3  | 8 -11 | 302.38 | 21.18 | 2 |

|     |    |     |        |       |   |
|-----|----|-----|--------|-------|---|
| -3  | 8  | -11 | 295.84 | 18.00 | 1 |
| -4  | 8  | -11 | 0.51   | 3.31  | 1 |
| -4  | 8  | -11 | 1.73   | 5.10  | 2 |
| -5  | 8  | -11 | 28.62  | 9.63  | 2 |
| -6  | 8  | -11 | 47.25  | 11.48 | 2 |
| -7  | 8  | -11 | 107.66 | 16.21 | 2 |
| -8  | 8  | -11 | 45.03  | 12.00 | 2 |
| -9  | 8  | -11 | 80.18  | 15.40 | 2 |
| -10 | 8  | -11 | -1.52  | 5.67  | 2 |
| -11 | 8  | -11 | -9.27  | 4.77  | 2 |
| -12 | 8  | -11 | -1.48  | 4.75  | 2 |
| -14 | -7 | 11  | 20.30  | 10.59 | 3 |
| -13 | -7 | 11  | 7.96   | 9.37  | 3 |
| -12 | -7 | 11  | 16.52  | 9.10  | 3 |
| -11 | -7 | 11  | 114.55 | 16.10 | 3 |
| 11  | 7  | -11 | 110.42 | 15.16 | 1 |
| -10 | -7 | 11  | 114.28 | 15.15 | 3 |
| 10  | 7  | -11 | 94.19  | 14.13 | 1 |
| -9  | -7 | 11  | 1.39   | 5.87  | 3 |
| 9   | 7  | -11 | -2.11  | 5.67  | 1 |
| 8   | 7  | -11 | 52.62  | 10.97 | 1 |
| -8  | -7 | 11  | 50.62  | 10.15 | 3 |
| 7   | 7  | -11 | 190.14 | 17.90 | 1 |
| -7  | -7 | 11  | 154.43 | 14.04 | 3 |
| 6   | 7  | -11 | 358.95 | 23.39 | 1 |
| -6  | -7 | 11  | 345.61 | 20.92 | 3 |
| 5   | 7  | -11 | 8.90   | 5.32  | 1 |
| -5  | -7 | 11  | 15.69  | 6.03  | 3 |
| 4   | 7  | -11 | 950.79 | 41.02 | 1 |
| -4  | -7 | 11  | 889.76 | 37.95 | 3 |
| 3   | 7  | -11 | 275.70 | 18.88 | 1 |
| 2   | 7  | -11 | 291.83 | 19.06 | 1 |
| 1   | 7  | -11 | 123.06 | 12.70 | 1 |
| 1   | 7  | -11 | 118.27 | 9.70  | 2 |
| 0   | 7  | -11 | 51.71  | 8.82  | 1 |
| 0   | 7  | -11 | 73.16  | 9.31  | 2 |
| -1  | 7  | -11 | 204.94 | 15.01 | 2 |
| -2  | 7  | -11 | 211.16 | 16.38 | 2 |
| -2  | 7  | -11 | 203.99 | 14.81 | 1 |
| -3  | 7  | -11 | 280.00 | 17.67 | 1 |
| -3  | 7  | -11 | 301.06 | 20.61 | 2 |
| -4  | 7  | -11 | 30.20  | 6.92  | 1 |
| -4  | 7  | -11 | 28.33  | 8.50  | 2 |
| -5  | 7  | -11 | 67.37  | 12.30 | 2 |
| -6  | 7  | -11 | 451.53 | 28.85 | 2 |
| -7  | 7  | -11 | -3.54  | 5.15  | 2 |

|     |    |     |        |       |   |
|-----|----|-----|--------|-------|---|
| -8  | 7  | -11 | 37.41  | 11.05 | 2 |
| -9  | 7  | -11 | 160.11 | 20.45 | 2 |
| -10 | 7  | -11 | 7.79   | 7.34  | 2 |
| -11 | 7  | -11 | 0.15   | 6.38  | 2 |
| -12 | 7  | -11 | -3.57  | 5.19  | 2 |
| -15 | -6 | 11  | 22.22  | 11.47 | 3 |
| -14 | -6 | 11  | 17.93  | 9.52  | 3 |
| -13 | -6 | 11  | 246.45 | 24.43 | 3 |
| -12 | -6 | 11  | 387.01 | 28.01 | 3 |
| -11 | -6 | 11  | 18.45  | 8.05  | 3 |
| 11  | 6  | -11 | 29.66  | 9.02  | 1 |
| 10  | 6  | -11 | -1.07  | 5.26  | 1 |
| -10 | -6 | 11  | 2.45   | 6.01  | 3 |
| 9   | 6  | -11 | 66.37  | 12.28 | 1 |
| -9  | -6 | 11  | 44.03  | 10.16 | 3 |
| 8   | 6  | -11 | 0.15   | 4.81  | 1 |
| -8  | -6 | 11  | -7.33  | 4.14  | 3 |
| -7  | -6 | 11  | 43.48  | 8.98  | 3 |
| 7   | 6  | -11 | 41.47  | 9.60  | 1 |
| 6   | 6  | -11 | 132.60 | 14.90 | 1 |
| -6  | -6 | 11  | 142.15 | 12.79 | 3 |
| -5  | -6 | 11  | 244.08 | 16.67 | 3 |
| 5   | 6  | -11 | 198.35 | 16.65 | 1 |
| -4  | -6 | 11  | 248.64 | 17.08 | 3 |
| 4   | 6  | -11 | 252.30 | 17.88 | 1 |
| 3   | 6  | -11 | 5.86   | 4.03  | 1 |
| 2   | 6  | -11 | 3.42   | 3.25  | 2 |
| 2   | 6  | -11 | 1.41   | 3.57  | 1 |
| 1   | 6  | -11 | 179.84 | 14.35 | 1 |
| 1   | 6  | -11 | 188.65 | 12.01 | 2 |
| 0   | 6  | -11 | 622.81 | 27.99 | 2 |
| 0   | 6  | -11 | 606.23 | 28.95 | 1 |
| -1  | 6  | -11 | 33.56  | 7.31  | 1 |
| -1  | 6  | -11 | 20.22  | 5.88  | 2 |
| -2  | 6  | -11 | 82.94  | 11.16 | 2 |
| -2  | 6  | -11 | 84.31  | 10.35 | 1 |
| -3  | 6  | -11 | 209.54 | 16.40 | 2 |
| -3  | 6  | -11 | 170.31 | 13.33 | 1 |
| -4  | 6  | -11 | 184.73 | 13.56 | 1 |
| -4  | 6  | -11 | 217.08 | 17.64 | 2 |
| -5  | 6  | -11 | 95.06  | 14.08 | 2 |
| -6  | 6  | -11 | 272.76 | 21.58 | 2 |
| -7  | 6  | -11 | 116.63 | 16.14 | 2 |
| -8  | 6  | -11 | 15.16  | 8.20  | 2 |
| -9  | 6  | -11 | 156.35 | 20.11 | 2 |
| -10 | 6  | -11 | 2.35   | 6.55  | 2 |



|     |    |     |         |       |   |
|-----|----|-----|---------|-------|---|
| -11 | 6  | -11 | 1.55    | 6.14  | 2 |
| -12 | 6  | -11 | 0.19    | 5.38  | 2 |
| -15 | -5 | 11  | -1.61   | 8.56  | 3 |
| -14 | -5 | 11  | 7.91    | 8.83  | 3 |
| -13 | -5 | 11  | 6.32    | 8.07  | 3 |
| -12 | -5 | 11  | 22.89   | 8.90  | 3 |
| -11 | -5 | 11  | 180.42  | 19.24 | 3 |
| 11  | 5  | -11 | 211.11  | 18.59 | 1 |
| -10 | -5 | 11  | 13.05   | 7.44  | 3 |
| 10  | 5  | -11 | 11.48   | 6.38  | 1 |
| 9   | 5  | -11 | 17.93   | 7.34  | 1 |
| -9  | -5 | 11  | 21.79   | 7.37  | 3 |
| 8   | 5  | -11 | 384.95  | 24.34 | 1 |
| -8  | -5 | 11  | 376.29  | 23.39 | 3 |
| -7  | -5 | 11  | 0.10    | 3.36  | 3 |
| 7   | 5  | -11 | 6.51    | 5.29  | 1 |
| 6   | 5  | -11 | 1247.47 | 49.73 | 1 |
| -6  | -5 | 11  | 1211.11 | 48.21 | 3 |
| 5   | 5  | -11 | 39.20   | 8.87  | 1 |
| -5  | -5 | 11  | 49.71   | 9.37  | 3 |
| -4  | -5 | 11  | 162.48  | 14.12 | 3 |
| 4   | 5  | -11 | 183.06  | 14.48 | 1 |
| 3   | 5  | -11 | 94.54   | 11.46 | 1 |
| 2   | 5  | -11 | 72.59   | 7.34  | 2 |
| 2   | 5  | -11 | 67.71   | 10.12 | 1 |
| 1   | 5  | -11 | 0.43    | 2.76  | 1 |
| 1   | 5  | -11 | 1.16    | 3.08  | 2 |
| 0   | 5  | -11 | 358.79  | 20.39 | 1 |
| 0   | 5  | -11 | 360.10  | 19.27 | 2 |
| -1  | 5  | -11 | 364.58  | 20.51 | 1 |
| -2  | 5  | -11 | 243.14  | 17.36 | 2 |
| -2  | 5  | -11 | 252.07  | 16.27 | 1 |
| -3  | 5  | -11 | 242.16  | 18.14 | 2 |
| -3  | 5  | -11 | 283.73  | 17.20 | 1 |
| -4  | 5  | -11 | 61.68   | 11.45 | 2 |
| -5  | 5  | -11 | 3.13    | 5.30  | 2 |
| -6  | 5  | -11 | 216.10  | 20.97 | 2 |
| -7  | 5  | -11 | 294.72  | 23.24 | 2 |
| -8  | 5  | -11 | 31.01   | 10.24 | 2 |
| -9  | 5  | -11 | 36.73   | 12.48 | 2 |
| -10 | 5  | -11 | 9.11    | 8.34  | 2 |
| -11 | 5  | -11 | 7.45    | 6.28  | 2 |
| -16 | -4 | 11  | 54.05   | 16.17 | 3 |
| -15 | -4 | 11  | 88.52   | 18.32 | 3 |
| -14 | -4 | 11  | 190.46  | 22.50 | 3 |
| -13 | -4 | 11  | 18.50   | 9.34  | 3 |

|     |    |     |        |       |   |
|-----|----|-----|--------|-------|---|
| -12 | -4 | 11  | 13.88  | 7.88  | 3 |
| -11 | -4 | 11  | 16.32  | 7.59  | 3 |
| 11  | 4  | -11 | 17.02  | 7.56  | 1 |
| -10 | -4 | 11  | 12.37  | 7.16  | 3 |
| 10  | 4  | -11 | 11.75  | 7.11  | 1 |
| -9  | -4 | 11  | 4.25   | 5.29  | 3 |
| 9   | 4  | -11 | -4.25  | 4.40  | 1 |
| -8  | -4 | 11  | 4.27   | 5.16  | 3 |
| 8   | 4  | -11 | 6.29   | 5.54  | 1 |
| -7  | -4 | 11  | 16.48  | 6.51  | 3 |
| 7   | 4  | -11 | 10.60  | 5.51  | 1 |
| 6   | 4  | -11 | 333.39 | 21.29 | 1 |
| -6  | -4 | 11  | 324.38 | 20.73 | 3 |
| 5   | 4  | -11 | 34.08  | 8.21  | 1 |
| -5  | -4 | 11  | 36.59  | 8.41  | 3 |
| 4   | 4  | -11 | 121.61 | 12.72 | 1 |
| -4  | -4 | 11  | 115.56 | 12.78 | 3 |
| 3   | 4  | -11 | 722.10 | 32.56 | 1 |
| 2   | 4  | -11 | 324.86 | 16.16 | 2 |
| 2   | 4  | -11 | 365.17 | 20.63 | 1 |
| 1   | 4  | -11 | 19.62  | 5.76  | 1 |
| 1   | 4  | -11 | 27.54  | 6.00  | 2 |
| 0   | 4  | -11 | 35.96  | 7.29  | 1 |
| 0   | 4  | -11 | 44.60  | 7.58  | 2 |
| -1  | 4  | -11 | 180.82 | 14.48 | 2 |
| -1  | 4  | -11 | 232.11 | 15.29 | 1 |
| -2  | 4  | -11 | 117.17 | 12.46 | 2 |
| -2  | 4  | -11 | 93.78  | 10.34 | 1 |
| -3  | 4  | -11 | 217.14 | 16.57 | 2 |
| -3  | 4  | -11 | 243.21 | 15.54 | 1 |
| -4  | 4  | -11 | 2.68   | 5.02  | 2 |
| -5  | 4  | -11 | 24.00  | 8.24  | 2 |
| -6  | 4  | -11 | 21.73  | 8.17  | 2 |
| -7  | 4  | -11 | 32.58  | 9.44  | 2 |
| -8  | 4  | -11 | 21.98  | 9.51  | 2 |
| -9  | 4  | -11 | 59.70  | 13.45 | 2 |
| -10 | 4  | -11 | 172.39 | 21.83 | 2 |
| -11 | 4  | -11 | -3.96  | 4.87  | 2 |
| -16 | -3 | 11  | 50.36  | 15.62 | 3 |
| -15 | -3 | 11  | 58.34  | 15.22 | 3 |
| -14 | -3 | 11  | 45.71  | 12.12 | 3 |
| -13 | -3 | 11  | 22.84  | 9.85  | 3 |
| 12  | 3  | -11 | -7.85  | 5.21  | 1 |
| -12 | -3 | 11  | -3.63  | 5.21  | 3 |
| 11  | 3  | -11 | 25.98  | 8.30  | 1 |
| -11 | -3 | 11  | 23.64  | 8.82  | 3 |

|     |    |     |        |       |   |
|-----|----|-----|--------|-------|---|
| 10  | 3  | -11 | 112.82 | 13.84 | 1 |
| -10 | -3 | 11  | 96.90  | 13.95 | 3 |
| -9  | -3 | 11  | 58.05  | 11.24 | 3 |
| 9   | 3  | -11 | 63.61  | 11.04 | 1 |
| -8  | -3 | 11  | 17.09  | 6.75  | 3 |
| 8   | 3  | -11 | 19.69  | 6.97  | 1 |
| 7   | 3  | -11 | 3.62   | 4.78  | 1 |
| -7  | -3 | 11  | 4.67   | 3.89  | 3 |
| 6   | 3  | -11 | -1.72  | 3.69  | 1 |
| -6  | -3 | 11  | 3.85   | 4.32  | 3 |
| 5   | 3  | -11 | -4.19  | 2.97  | 1 |
| -5  | -3 | 11  | 6.82   | 4.80  | 3 |
| -4  | -3 | 11  | 76.50  | 11.08 | 3 |
| 4   | 3  | -11 | 68.21  | 9.96  | 1 |
| 3   | 3  | -11 | -2.09  | 2.97  | 1 |
| 2   | 3  | -11 | 27.94  | 5.38  | 2 |
| 2   | 3  | -11 | 16.43  | 5.48  | 1 |
| 1   | 3  | -11 | 18.94  | 5.07  | 2 |
| 1   | 3  | -11 | 19.08  | 5.84  | 1 |
| 0   | 3  | -11 | 5.62   | 3.78  | 1 |
| 0   | 3  | -11 | 6.05   | 4.04  | 2 |
| -1  | 3  | -11 | 11.79  | 5.28  | 2 |
| -1  | 3  | -11 | 27.24  | 6.59  | 1 |
| -2  | 3  | -11 | 2.26   | 4.35  | 2 |
| -2  | 3  | -11 | 5.19   | 3.69  | 1 |
| -3  | 3  | -11 | 53.96  | 8.28  | 1 |
| -3  | 3  | -11 | 53.57  | 9.69  | 2 |
| -4  | 3  | -11 | 304.86 | 21.01 | 2 |
| -5  | 3  | -11 | 310.14 | 22.13 | 2 |
| -6  | 3  | -11 | 50.82  | 10.88 | 2 |
| -7  | 3  | -11 | 7.74   | 6.89  | 2 |
| -8  | 3  | -11 | 18.40  | 8.99  | 2 |
| -9  | 3  | -11 | 132.42 | 19.33 | 2 |
| -10 | 3  | -11 | 3.07   | 6.73  | 2 |
| -11 | 3  | -11 | 0.90   | 5.37  | 2 |
| -16 | -2 | 11  | 93.12  | 19.56 | 3 |
| -15 | -2 | 11  | 39.80  | 13.21 | 3 |
| -14 | -2 | 11  | -4.16  | 5.88  | 3 |
| -13 | -2 | 11  | 97.37  | 16.47 | 3 |
| -12 | -2 | 11  | -1.80  | 5.86  | 3 |
| 12  | 2  | -11 | 0.25   | 5.89  | 1 |
| -11 | -2 | 11  | -2.62  | 4.67  | 3 |
| 11  | 2  | -11 | 4.57   | 5.69  | 1 |
| 10  | 2  | -11 | 19.33  | 6.95  | 1 |
| -10 | -2 | 11  | 33.31  | 9.72  | 3 |
| -9  | -2 | 11  | 23.34  | 8.15  | 3 |

|     |    |     |        |       |   |
|-----|----|-----|--------|-------|---|
| 9   | 2  | -11 | 21.47  | 7.21  | 1 |
| 8   | 2  | -11 | 6.32   | 4.79  | 1 |
| -8  | -2 | 11  | 13.20  | 6.59  | 3 |
| -7  | -2 | 11  | 92.82  | 12.43 | 3 |
| 7   | 2  | -11 | 100.64 | 12.29 | 1 |
| 6   | 2  | -11 | 386.81 | 22.54 | 1 |
| -6  | -2 | 11  | 407.73 | 23.80 | 3 |
| -5  | -2 | 11  | 591.07 | 30.60 | 3 |
| 5   | 2  | -11 | 608.12 | 29.35 | 1 |
| 4   | 2  | -11 | 816.02 | 35.59 | 1 |
| 3   | 2  | -11 | 56.76  | 9.13  | 1 |
| 2   | 2  | -11 | 37.11  | 6.15  | 2 |
| 2   | 2  | -11 | 31.05  | 6.97  | 1 |
| 1   | 2  | -11 | 17.93  | 5.66  | 1 |
| 1   | 2  | -11 | 5.12   | 3.89  | 2 |
| 0   | 2  | -11 | 14.50  | 5.32  | 1 |
| 0   | 2  | -11 | 9.28   | 4.45  | 2 |
| -1  | 2  | -11 | 188.02 | 14.30 | 2 |
| -1  | 2  | -11 | 188.74 | 13.90 | 1 |
| -2  | 2  | -11 | 19.58  | 6.51  | 2 |
| -2  | 2  | -11 | 23.63  | 6.02  | 1 |
| -3  | 2  | -11 | 12.01  | 4.85  | 1 |
| -3  | 2  | -11 | 18.15  | 6.51  | 2 |
| -4  | 2  | -11 | 3.95   | 5.13  | 2 |
| -5  | 2  | -11 | 7.11   | 5.71  | 2 |
| -6  | 2  | -11 | 7.69   | 6.56  | 2 |
| -7  | 2  | -11 | 381.16 | 27.54 | 2 |
| -8  | 2  | -11 | 44.87  | 12.26 | 2 |
| -9  | 2  | -11 | -2.03  | 5.81  | 2 |
| -10 | 2  | -11 | 3.96   | 8.04  | 2 |
| -11 | 2  | -11 | 1.09   | 5.80  | 2 |
| -16 | -1 | 11  | -1.60  | 8.59  | 3 |
| -15 | -1 | 11  | 2.65   | 7.83  | 3 |
| -14 | -1 | 11  | 31.74  | 10.64 | 3 |
| -13 | -1 | 11  | 192.84 | 21.53 | 3 |
| 12  | 1  | -11 | 243.49 | 19.63 | 1 |
| -12 | -1 | 11  | 250.46 | 21.52 | 3 |
| -11 | -1 | 11  | 7.92   | 6.70  | 3 |
| 11  | 1  | -11 | 1.79   | 5.39  | 1 |
| 10  | 1  | -11 | 83.95  | 11.94 | 1 |
| -10 | -1 | 11  | 90.03  | 13.73 | 3 |
| 9   | 1  | -11 | 314.81 | 20.93 | 1 |
| -9  | -1 | 11  | 321.02 | 22.24 | 3 |
| 8   | 1  | -11 | 6.71   | 4.77  | 1 |
| -8  | -1 | 11  | 11.89  | 5.81  | 3 |
| -7  | -1 | 11  | 8.81   | 5.38  | 3 |

|     |    |     |        |       |   |
|-----|----|-----|--------|-------|---|
| 7   | 1  | -11 | 3.63   | 3.93  | 1 |
| 6   | 1  | -11 | 17.80  | 6.64  | 1 |
| -6  | -1 | 11  | 15.06  | 5.74  | 3 |
| -5  | -1 | 11  | 4.49   | 5.03  | 3 |
| 5   | 1  | -11 | 5.47   | 4.30  | 1 |
| 4   | 1  | -11 | 87.57  | 10.96 | 1 |
| 3   | 1  | -11 | 50.66  | 8.85  | 1 |
| 2   | 1  | -11 | 13.66  | 4.06  | 2 |
| 2   | 1  | -11 | 15.02  | 5.11  | 1 |
| 1   | 1  | -11 | 182.55 | 12.79 | 2 |
| 1   | 1  | -11 | 185.62 | 13.89 | 1 |
| 0   | 1  | -11 | 198.24 | 14.41 | 1 |
| -1  | 1  | -11 | 19.85  | 6.28  | 2 |
| -1  | 1  | -11 | 11.96  | 4.85  | 1 |
| -2  | 1  | -11 | 44.77  | 8.97  | 2 |
| -2  | 1  | -11 | 72.39  | 9.32  | 1 |
| -3  | 1  | -11 | 69.90  | 9.43  | 1 |
| -3  | 1  | -11 | 62.71  | 10.94 | 2 |
| -4  | 1  | -11 | 0.91   | 4.95  | 2 |
| -5  | 1  | -11 | 11.90  | 6.98  | 2 |
| -6  | 1  | -11 | 35.16  | 10.29 | 2 |
| -7  | 1  | -11 | 2.16   | 6.80  | 2 |
| -8  | 1  | -11 | 4.88   | 7.31  | 2 |
| -9  | 1  | -11 | 37.43  | 12.35 | 2 |
| -10 | 1  | -11 | 6.29   | 8.33  | 2 |
| -11 | 1  | -11 | 9.15   | 7.24  | 2 |
| -17 | 0  | 11  | 8.67   | 10.14 | 3 |
| -16 | 0  | 11  | 23.21  | 11.03 | 3 |
| -15 | 0  | 11  | 38.80  | 13.02 | 3 |
| -14 | 0  | 11  | 83.57  | 15.97 | 3 |
| -13 | 0  | 11  | 100.74 | 16.57 | 3 |
| 12  | 0  | -11 | 2.80   | 6.04  | 1 |
| -12 | 0  | 11  | 1.14   | 5.13  | 3 |
| -11 | 0  | 11  | 14.94  | 7.43  | 3 |
| 11  | 0  | -11 | 11.74  | 5.91  | 1 |
| 10  | 0  | -11 | 11.44  | 6.12  | 1 |
| -10 | 0  | 11  | 1.18   | 5.29  | 3 |
| 9   | 0  | -11 | 2.59   | 5.28  | 1 |
| -9  | 0  | 11  | -2.71  | 4.42  | 3 |
| 8   | 0  | -11 | 5.64   | 4.79  | 1 |
| -8  | 0  | 11  | 13.39  | 6.09  | 3 |
| -7  | 0  | 11  | -8.52  | 3.10  | 3 |
| 7   | 0  | -11 | 1.79   | 3.56  | 1 |
| 6   | 0  | -11 | 394.60 | 22.89 | 1 |
| -6  | 0  | 11  | 368.53 | 23.60 | 3 |
| -5  | 0  | 11  | 315.80 | 21.66 | 3 |

|     |    |     |        |       |   |
|-----|----|-----|--------|-------|---|
| 5   | 0  | -11 | 336.65 | 20.43 | 1 |
| 4   | 0  | -11 | 36.18  | 7.62  | 1 |
| 3   | 0  | -11 | 1.78   | 2.88  | 2 |
| 3   | 0  | -11 | 1.38   | 3.81  | 1 |
| 2   | 0  | -11 | 123.79 | 12.48 | 1 |
| 2   | 0  | -11 | 139.17 | 10.69 | 2 |
| 1   | 0  | -11 | 121.89 | 10.45 | 2 |
| 1   | 0  | -11 | 113.68 | 11.98 | 1 |
| 0   | 0  | -11 | 18.75  | 6.04  | 1 |
| 0   | 0  | -11 | 4.12   | 3.76  | 2 |
| -1  | 0  | -11 | 185.88 | 14.04 | 1 |
| -1  | 0  | -11 | 201.86 | 15.24 | 2 |
| -2  | 0  | -11 | 9.83   | 4.84  | 1 |
| -2  | 0  | -11 | 19.11  | 6.61  | 2 |
| -3  | 0  | -11 | -2.54  | 3.80  | 2 |
| -3  | 0  | -11 | 2.26   | 3.95  | 1 |
| -4  | 0  | -11 | 38.53  | 10.05 | 2 |
| -5  | 0  | -11 | 97.21  | 15.04 | 2 |
| -6  | 0  | -11 | 179.27 | 20.68 | 2 |
| -7  | 0  | -11 | 64.31  | 14.54 | 2 |
| -8  | 0  | -11 | 22.46  | 10.05 | 2 |
| -9  | 0  | -11 | 3.01   | 8.20  | 2 |
| -10 | 0  | -11 | -5.93  | 5.60  | 2 |
| -17 | 1  | 11  | 39.07  | 14.49 | 3 |
| -16 | 1  | 11  | -12.80 | 6.58  | 3 |
| -15 | 1  | 11  | 450.79 | 33.15 | 3 |
| -14 | 1  | 11  | 435.12 | 31.06 | 3 |
| -13 | 1  | 11  | 3.16   | 7.15  | 3 |
| -12 | 1  | 11  | 42.44  | 11.10 | 3 |
| 12  | -1 | -11 | 72.65  | 11.74 | 1 |
| 11  | -1 | -11 | 86.63  | 11.89 | 1 |
| -11 | 1  | 11  | 89.75  | 14.67 | 3 |
| 10  | -1 | -11 | 137.41 | 14.78 | 1 |
| -10 | 1  | 11  | 130.72 | 16.18 | 3 |
| -9  | 1  | 11  | 4.68   | 5.43  | 3 |
| 9   | -1 | -11 | 10.10  | 5.58  | 1 |
| -8  | 1  | 11  | 357.13 | 23.84 | 3 |
| 8   | -1 | -11 | 357.32 | 22.34 | 1 |
| -7  | 1  | 11  | 401.01 | 25.42 | 3 |
| 7   | -1 | -11 | 408.18 | 23.60 | 1 |
| 6   | -1 | -11 | 74.65  | 11.13 | 1 |
| -6  | 1  | 11  | 94.58  | 13.45 | 3 |
| 5   | -1 | -11 | 498.52 | 26.02 | 1 |
| 4   | -1 | -11 | 284.48 | 18.47 | 1 |
| 3   | -1 | -11 | 896.05 | 38.15 | 1 |
| 3   | -1 | -11 | 903.10 | 33.95 | 2 |

|     |    |     |         |       |   |
|-----|----|-----|---------|-------|---|
| 2   | -1 | -11 | 1830.67 | 65.73 | 1 |
| 2   | -1 | -11 | 1929.21 | 63.52 | 2 |
| 1   | -1 | -11 | 159.69  | 13.24 | 1 |
| 1   | -1 | -11 | 144.98  | 12.36 | 2 |
| 0   | -1 | -11 | 29.32   | 7.20  | 1 |
| 0   | -1 | -11 | 26.08   | 6.70  | 2 |
| -1  | -1 | -11 | 148.54  | 12.68 | 1 |
| -1  | -1 | -11 | 149.90  | 13.54 | 2 |
| -2  | -1 | -11 | 0.31    | 4.35  | 2 |
| -2  | -1 | -11 | 6.47    | 3.87  | 1 |
| -3  | -1 | -11 | 3.99    | 4.99  | 2 |
| -3  | -1 | -11 | 3.02    | 4.06  | 1 |
| -4  | -1 | -11 | 29.24   | 9.44  | 2 |
| -5  | -1 | -11 | 174.54  | 19.85 | 2 |
| -6  | -1 | -11 | -0.50   | 5.85  | 2 |
| -7  | -1 | -11 | 14.83   | 8.42  | 2 |
| -8  | -1 | -11 | 44.43   | 13.23 | 2 |
| -9  | -1 | -11 | 6.01    | 7.66  | 2 |
| -10 | -1 | -11 | 2.14    | 7.08  | 2 |
| -17 | 2  | 11  | 166.82  | 24.31 | 3 |
| -16 | 2  | 11  | 10.39   | 9.33  | 3 |
| -15 | 2  | 11  | 69.87   | 15.64 | 3 |
| -14 | 2  | 11  | 248.41  | 24.72 | 3 |
| -13 | 2  | 11  | 163.27  | 19.89 | 3 |
| -12 | 2  | 11  | 195.98  | 20.59 | 3 |
| 12  | -2 | -11 | 146.36  | 15.61 | 1 |
| -11 | 2  | 11  | 28.23   | 9.32  | 3 |
| 11  | -2 | -11 | 34.65   | 9.22  | 1 |
| -10 | 2  | 11  | 17.33   | 7.35  | 3 |
| 10  | -2 | -11 | 5.68    | 5.51  | 1 |
| -9  | 2  | 11  | -3.59   | 3.65  | 3 |
| 9   | -2 | -11 | 0.37    | 4.58  | 1 |
| 8   | -2 | -11 | 814.86  | 36.95 | 1 |
| -8  | 2  | 11  | 796.59  | 39.37 | 3 |
| -7  | 2  | 11  | 5.85    | 5.26  | 3 |
| 7   | -2 | -11 | 4.72    | 4.76  | 1 |
| 6   | -2 | -11 | 870.68  | 38.02 | 1 |
| -6  | 2  | 11  | 829.96  | 40.85 | 3 |
| 5   | -2 | -11 | 3.41    | 4.33  | 1 |
| 4   | -2 | -11 | 463.43  | 24.89 | 1 |
| 3   | -2 | -11 | 7.57    | 4.39  | 1 |
| 3   | -2 | -11 | 5.85    | 3.78  | 2 |
| 2   | -2 | -11 | 309.47  | 17.91 | 2 |
| 2   | -2 | -11 | 257.40  | 18.23 | 1 |
| 0   | -2 | -11 | 8.18    | 4.56  | 1 |
| 0   | -2 | -11 | 12.88   | 5.14  | 2 |

|     |    |     |        |       |   |
|-----|----|-----|--------|-------|---|
| -1  | -2 | -11 | 88.37  | 10.91 | 1 |
| -1  | -2 | -11 | 37.89  | 8.57  | 2 |
| -2  | -2 | -11 | 50.13  | 10.69 | 2 |
| -2  | -2 | -11 | 46.35  | 8.15  | 1 |
| -3  | -2 | -11 | -0.05  | 5.20  | 2 |
| -3  | -2 | -11 | -0.16  | 3.26  | 1 |
| -4  | -2 | -11 | 169.58 | 19.25 | 2 |
| -5  | -2 | -11 | 41.87  | 11.37 | 2 |
| -6  | -2 | -11 | 16.96  | 9.18  | 2 |
| -7  | -2 | -11 | 10.39  | 8.60  | 2 |
| -8  | -2 | -11 | 1.77   | 7.85  | 2 |
| -9  | -2 | -11 | -3.01  | 6.28  | 2 |
| -17 | 3  | 11  | 0.57   | 6.16  | 3 |
| -16 | 3  | 11  | -2.77  | 7.29  | 3 |
| -15 | 3  | 11  | 3.66   | 7.77  | 3 |
| -14 | 3  | 11  | 126.85 | 19.30 | 3 |
| -13 | 3  | 11  | 6.20   | 7.37  | 3 |
| 12  | -3 | -11 | 67.91  | 11.72 | 1 |
| -12 | 3  | 11  | 47.13  | 12.37 | 3 |
| 11  | -3 | -11 | 38.69  | 9.67  | 1 |
| -11 | 3  | 11  | 39.73  | 10.93 | 3 |
| 10  | -3 | -11 | 376.00 | 23.78 | 1 |
| -10 | 3  | 11  | 380.64 | 26.27 | 3 |
| -9  | 3  | 11  | 10.25  | 7.66  | 3 |
| 9   | -3 | -11 | 8.56   | 6.17  | 1 |
| 8   | -3 | -11 | 489.88 | 27.26 | 1 |
| -8  | 3  | 11  | 487.39 | 29.71 | 3 |
| 7   | -3 | -11 | 64.98  | 11.42 | 1 |
| -7  | 3  | 11  | 92.63  | 14.81 | 3 |
| -6  | 3  | 11  | 322.89 | 23.37 | 3 |
| 6   | -3 | -11 | 299.31 | 20.46 | 1 |
| 5   | -3 | -11 | 642.93 | 31.83 | 1 |
| 4   | -3 | -11 | 462.40 | 25.41 | 1 |
| 3   | -3 | -11 | 12.21  | 4.83  | 2 |
| 3   | -3 | -11 | 21.35  | 6.72  | 1 |
| 2   | -3 | -11 | 201.02 | 15.40 | 1 |
| 2   | -3 | -11 | 190.53 | 14.53 | 2 |
| 1   | -3 | -11 | 584.46 | 28.91 | 1 |
| 1   | -3 | -11 | 588.18 | 29.12 | 2 |
| 0   | -3 | -11 | 53.23  | 10.23 | 2 |
| 0   | -3 | -11 | 44.15  | 8.62  | 1 |
| -1  | -3 | -11 | 29.72  | 8.29  | 2 |
| -1  | -3 | -11 | 14.89  | 5.70  | 1 |
| -2  | -3 | -11 | 2.87   | 3.92  | 1 |
| -2  | -3 | -11 | 2.34   | 5.43  | 2 |
| -3  | -3 | -11 | 148.87 | 18.27 | 2 |



|     |    |     |        |       |   |
|-----|----|-----|--------|-------|---|
| -3  | -3 | -11 | 165.41 | 13.85 | 1 |
| -4  | -3 | -11 | 11.26  | 7.23  | 2 |
| -5  | -3 | -11 | 48.35  | 12.86 | 2 |
| -6  | -3 | -11 | 31.33  | 11.92 | 2 |
| -7  | -3 | -11 | 20.88  | 11.22 | 2 |
| -9  | -3 | -11 | -5.99  | 6.26  | 2 |
| -17 | 4  | 11  | -8.53  | 5.93  | 3 |
| -16 | 4  | 11  | 5.74   | 8.30  | 3 |
| -15 | 4  | 11  | 61.79  | 14.99 | 3 |
| -14 | 4  | 11  | 44.24  | 13.47 | 3 |
| -13 | 4  | 11  | 11.63  | 8.98  | 3 |
| -12 | 4  | 11  | 79.10  | 15.37 | 3 |
| 12  | -4 | -11 | 87.88  | 12.92 | 1 |
| -11 | 4  | 11  | 135.02 | 17.55 | 3 |
| 11  | -4 | -11 | 144.60 | 15.35 | 1 |
| -10 | 4  | 11  | 176.75 | 19.11 | 3 |
| 10  | -4 | -11 | 171.87 | 16.85 | 1 |
| 9   | -4 | -11 | 84.63  | 12.71 | 1 |
| -9  | 4  | 11  | 82.12  | 14.39 | 3 |
| 8   | -4 | -11 | 0.12   | 5.07  | 1 |
| -8  | 4  | 11  | 1.84   | 6.54  | 3 |
| -7  | 4  | 11  | 83.31  | 14.76 | 3 |
| 7   | -4 | -11 | 79.83  | 12.33 | 1 |
| 6   | -4 | -11 | 0.33   | 4.73  | 1 |
| 5   | -4 | -11 | 3.16   | 4.73  | 1 |
| 4   | -4 | -11 | 429.37 | 24.49 | 1 |
| 3   | -4 | -11 | 302.58 | 20.53 | 1 |
| 2   | -4 | -11 | 79.84  | 11.73 | 1 |
| 1   | -4 | -11 | 5.73   | 5.07  | 2 |
| 1   | -4 | -11 | 3.94   | 4.66  | 1 |
| 0   | -4 | -11 | 60.15  | 11.05 | 2 |
| 0   | -4 | -11 | 74.83  | 11.20 | 1 |
| -1  | -4 | -11 | 1.28   | 4.01  | 1 |
| -1  | -4 | -11 | 17.95  | 8.14  | 2 |
| -2  | -4 | -11 | 567.16 | 29.57 | 1 |
| -2  | -4 | -11 | 573.16 | 33.96 | 2 |
| -3  | -4 | -11 | 16.49  | 8.05  | 2 |
| -3  | -4 | -11 | 13.09  | 5.98  | 1 |
| -4  | -4 | -11 | 12.55  | 8.37  | 2 |
| -5  | -4 | -11 | 40.67  | 12.60 | 2 |
| -6  | -4 | -11 | 19.35  | 10.78 | 2 |
| -7  | -4 | -11 | 60.93  | 15.62 | 2 |
| -8  | -4 | -11 | 2.72   | 7.27  | 2 |
| -17 | 5  | 11  | 3.35   | 6.09  | 3 |
| -16 | 5  | 11  | -1.17  | 7.32  | 3 |
| -15 | 5  | 11  | 35.12  | 12.38 | 3 |

|     |    |     |        |       |   |
|-----|----|-----|--------|-------|---|
| -14 | 5  | 11  | 38.21  | 12.92 | 3 |
| -13 | 5  | 11  | 51.96  | 13.71 | 3 |
| 12  | -5 | -11 | 87.00  | 12.91 | 1 |
| -12 | 5  | 11  | 91.48  | 15.64 | 3 |
| -11 | 5  | 11  | 29.34  | 9.91  | 3 |
| 11  | -5 | -11 | 24.10  | 8.45  | 1 |
| 10  | -5 | -11 | 25.38  | 8.57  | 1 |
| -10 | 5  | 11  | 35.54  | 11.04 | 3 |
| -9  | 5  | 11  | 134.13 | 17.68 | 3 |
| 9   | -5 | -11 | 169.63 | 17.01 | 1 |
| -8  | 5  | 11  | 15.75  | 9.03  | 3 |
| 8   | -5 | -11 | 17.78  | 7.23  | 1 |
| 7   | -5 | -11 | 299.79 | 21.27 | 1 |
| 6   | -5 | -11 | 65.48  | 11.61 | 1 |
| 5   | -5 | -11 | 30.72  | 9.21  | 1 |
| 4   | -5 | -11 | 345.50 | 22.50 | 1 |
| 3   | -5 | -11 | 83.21  | 12.50 | 1 |
| 2   | -5 | -11 | 743.29 | 36.05 | 1 |
| 1   | -5 | -11 | 9.89   | 5.47  | 1 |
| 1   | -5 | -11 | 13.42  | 6.24  | 2 |
| 0   | -5 | -11 | 91.94  | 12.87 | 1 |
| 0   | -5 | -11 | 120.11 | 15.15 | 2 |
| -1  | -5 | -11 | 19.32  | 6.97  | 1 |
| -1  | -5 | -11 | 7.24   | 6.41  | 2 |
| -2  | -5 | -11 | 44.38  | 11.43 | 2 |
| -2  | -5 | -11 | 51.85  | 10.02 | 1 |
| -3  | -5 | -11 | 393.35 | 24.56 | 1 |
| -3  | -5 | -11 | 405.66 | 29.65 | 2 |
| -4  | -5 | -11 | 8.89   | 8.33  | 2 |
| -5  | -5 | -11 | 289.26 | 28.64 | 2 |
| -7  | -5 | -11 | -2.16  | 6.83  | 2 |
| -8  | -5 | -11 | 6.01   | 6.97  | 2 |
| -17 | 6  | 11  | 3.88   | 7.86  | 3 |
| -16 | 6  | 11  | 7.74   | 7.87  | 3 |
| -15 | 6  | 11  | 20.80  | 10.55 | 3 |
| -14 | 6  | 11  | -2.37  | 7.90  | 3 |
| -13 | 6  | 11  | 80.54  | 15.39 | 3 |
| 12  | -6 | -11 | 235.09 | 19.35 | 1 |
| -12 | 6  | 11  | 217.31 | 23.29 | 3 |
| -11 | 6  | 11  | 50.83  | 12.34 | 3 |
| 11  | -6 | -11 | 84.44  | 13.57 | 1 |
| 10  | -6 | -11 | 17.10  | 7.46  | 1 |
| -10 | 6  | 11  | 19.93  | 9.13  | 3 |
| -9  | 6  | 11  | 164.08 | 20.13 | 3 |
| 9   | -6 | -11 | 193.62 | 18.36 | 1 |
| 8   | -6 | -11 | 18.03  | 7.51  | 1 |

|     |    |     |        |       |   |
|-----|----|-----|--------|-------|---|
| -8  | 6  | 11  | 5.34   | 7.62  | 3 |
| 7   | -6 | -11 | 21.39  | 8.42  | 1 |
| 6   | -6 | -11 | 517.78 | 29.64 | 1 |
| 5   | -6 | -11 | 255.76 | 20.41 | 1 |
| 4   | -6 | -11 | 91.83  | 13.45 | 1 |
| 3   | -6 | -11 | 13.43  | 5.99  | 1 |
| 2   | -6 | -11 | 61.59  | 11.50 | 1 |
| 1   | -6 | -11 | 3.99   | 5.00  | 1 |
| 0   | -6 | -11 | 178.22 | 19.38 | 2 |
| 0   | -6 | -11 | 202.00 | 17.73 | 1 |
| -1  | -6 | -11 | -4.14  | 4.43  | 1 |
| -1  | -6 | -11 | 3.19   | 5.99  | 2 |
| -2  | -6 | -11 | 2.04   | 6.07  | 2 |
| -2  | -6 | -11 | 9.11   | 6.18  | 1 |
| -3  | -6 | -11 | 55.42  | 11.51 | 1 |
| -3  | -6 | -11 | 49.12  | 13.90 | 2 |
| -4  | -6 | -11 | 30.56  | 11.28 | 2 |
| -5  | -6 | -11 | 1.16   | 7.61  | 2 |
| -6  | -6 | -11 | 47.13  | 13.54 | 2 |
| -7  | -6 | -11 | 3.12   | 6.94  | 2 |
| -16 | 7  | 11  | 0.27   | 7.43  | 3 |
| -15 | 7  | 11  | 27.90  | 11.85 | 3 |
| -14 | 7  | 11  | 41.26  | 12.17 | 3 |
| -13 | 7  | 11  | 6.17   | 9.04  | 3 |
| -12 | 7  | 11  | 30.08  | 11.26 | 3 |
| 12  | -7 | -11 | 27.42  | 9.11  | 1 |
| 11  | -7 | -11 | 70.87  | 12.62 | 1 |
| -11 | 7  | 11  | 57.00  | 14.05 | 3 |
| -10 | 7  | 11  | 141.85 | 19.12 | 3 |
| 10  | -7 | -11 | 125.64 | 15.75 | 1 |
| 9   | -7 | -11 | 45.42  | 10.49 | 1 |
| -9  | 7  | 11  | 34.84  | 10.92 | 3 |
| 8   | -7 | -11 | 1.28   | 6.25  | 1 |
| 7   | -7 | -11 | 1.66   | 6.57  | 1 |
| 6   | -7 | -11 | 29.89  | 9.85  | 1 |
| 5   | -7 | -11 | 2.55   | 6.09  | 1 |
| 4   | -7 | -11 | 119.79 | 15.95 | 1 |
| 3   | -7 | -11 | 56.37  | 11.76 | 1 |
| 2   | -7 | -11 | 186.88 | 18.88 | 1 |
| 1   | -7 | -11 | 1.53   | 4.99  | 1 |
| 0   | -7 | -11 | 14.34  | 6.94  | 1 |
| -1  | -7 | -11 | 23.06  | 8.20  | 1 |
| -1  | -7 | -11 | 10.72  | 7.74  | 2 |
| -2  | -7 | -11 | 28.28  | 8.70  | 1 |
| -2  | -7 | -11 | 12.42  | 8.34  | 2 |
| -3  | -7 | -11 | 208.13 | 24.48 | 2 |

|     |    |     |        |       |   |
|-----|----|-----|--------|-------|---|
| -3  | -7 | -11 | 215.56 | 19.19 | 1 |
| -4  | -7 | -11 | 57.90  | 13.81 | 2 |
| -5  | -7 | -11 | -0.66  | 8.20  | 2 |
| -6  | -7 | -11 | -6.03  | 6.82  | 2 |
| -16 | 8  | 11  | 4.69   | 8.56  | 3 |
| -15 | 8  | 11  | -2.36  | 7.68  | 3 |
| -14 | 8  | 11  | 2.88   | 8.07  | 3 |
| -13 | 8  | 11  | 13.01  | 9.32  | 3 |
| 12  | -8 | -11 | 13.88  | 7.52  | 1 |
| -12 | 8  | 11  | 4.08   | 8.87  | 3 |
| -11 | 8  | 11  | -7.50  | 7.28  | 3 |
| 11  | -8 | -11 | 2.18   | 7.08  | 1 |
| -10 | 8  | 11  | 40.07  | 12.50 | 3 |
| 10  | -8 | -11 | 33.27  | 10.09 | 1 |
| 9   | -8 | -11 | 92.21  | 14.76 | 1 |
| 8   | -8 | -11 | 105.24 | 15.71 | 1 |
| 7   | -8 | -11 | 103.10 | 15.68 | 1 |
| 6   | -8 | -11 | 1.11   | 5.92  | 1 |
| 5   | -8 | -11 | -0.61  | 6.59  | 1 |
| 4   | -8 | -11 | 83.21  | 13.94 | 1 |
| 3   | -8 | -11 | 221.94 | 19.07 | 1 |
| 2   | -8 | -11 | 8.06   | 5.78  | 1 |
| 1   | -8 | -11 | 4.27   | 6.37  | 1 |
| 0   | -8 | -11 | 11.41  | 6.62  | 1 |
| -1  | -8 | -11 | 106.02 | 15.81 | 1 |
| -1  | -8 | -11 | 109.05 | 18.28 | 2 |
| -2  | -8 | -11 | -2.58  | 6.33  | 1 |
| -2  | -8 | -11 | -0.24  | 7.29  | 2 |
| -3  | -8 | -11 | 35.14  | 11.69 | 2 |
| -3  | -8 | -11 | 55.87  | 11.69 | 1 |
| -4  | -8 | -11 | 70.93  | 16.40 | 2 |
| -5  | -8 | -11 | 9.20   | 8.19  | 2 |
| -6  | -8 | -11 | -6.96  | 6.16  | 2 |
| -16 | 9  | 11  | 15.21  | 12.24 | 3 |
| -15 | 9  | 11  | 112.12 | 20.53 | 3 |
| -14 | 9  | 11  | 4.28   | 8.95  | 3 |
| -13 | 9  | 11  | 2.75   | 8.30  | 3 |
| 12  | -9 | -11 | 3.38   | 8.05  | 1 |
| -12 | 9  | 11  | -0.57  | 9.26  | 3 |
| 11  | -9 | -11 | 13.53  | 8.26  | 1 |
| -11 | 9  | 11  | 33.29  | 12.80 | 3 |
| -10 | 9  | 11  | 14.50  | 11.58 | 3 |
| 10  | -9 | -11 | 13.03  | 8.59  | 1 |
| 9   | -9 | -11 | 25.10  | 9.66  | 1 |
| 8   | -9 | -11 | 11.15  | 8.21  | 1 |
| 7   | -9 | -11 | 14.68  | 8.71  | 1 |

|     |     |     |        |       |   |
|-----|-----|-----|--------|-------|---|
| 6   | -9  | -11 | 4.78   | 8.08  | 1 |
| 5   | -9  | -11 | 38.17  | 11.56 | 1 |
| 4   | -9  | -11 | -1.78  | 6.04  | 1 |
| 3   | -9  | -11 | 26.57  | 8.58  | 1 |
| 2   | -9  | -11 | 145.85 | 18.39 | 1 |
| 1   | -9  | -11 | 3.87   | 6.66  | 1 |
| 0   | -9  | -11 | -6.88  | 5.92  | 1 |
| -1  | -9  | -11 | 16.04  | 8.47  | 1 |
| -1  | -9  | -11 | 2.26   | 7.75  | 2 |
| -2  | -9  | -11 | 0.12   | 7.42  | 2 |
| -2  | -9  | -11 | -12.25 | 6.11  | 1 |
| -3  | -9  | -11 | 24.94  | 11.11 | 2 |
| -3  | -9  | -11 | 54.79  | 12.76 | 1 |
| -4  | -9  | -11 | -5.82  | 7.05  | 2 |
| -5  | -9  | -11 | 3.98   | 7.16  | 2 |
| -15 | 10  | 11  | -9.50  | 8.65  | 3 |
| -14 | 10  | 11  | 16.16  | 11.69 | 3 |
| -13 | 10  | 11  | 22.36  | 12.28 | 3 |
| -12 | 10  | 11  | 42.67  | 14.94 | 3 |
| 12  | -10 | -11 | 73.73  | 14.11 | 1 |
| -11 | 10  | 11  | 23.65  | 11.94 | 3 |
| 11  | -10 | -11 | 36.20  | 11.09 | 1 |
| 10  | -10 | -11 | 12.29  | 9.14  | 1 |
| 9   | -10 | -11 | 13.80  | 8.96  | 1 |
| 8   | -10 | -11 | 76.18  | 15.17 | 1 |
| 7   | -10 | -11 | -5.17  | 7.35  | 1 |
| 6   | -10 | -11 | 91.03  | 16.07 | 1 |
| 5   | -10 | -11 | 7.60   | 8.95  | 1 |
| 4   | -10 | -11 | 5.95   | 7.21  | 1 |
| 3   | -10 | -11 | -1.38  | 6.09  | 1 |
| 2   | -10 | -11 | 30.71  | 9.77  | 1 |
| 1   | -10 | -11 | -2.35  | 5.78  | 1 |
| 0   | -10 | -11 | 9.98   | 7.48  | 1 |
| -1  | -10 | -11 | 19.55  | 9.14  | 1 |
| -2  | -10 | -11 | 102.63 | 18.86 | 2 |
| -2  | -10 | -11 | 94.05  | 15.92 | 1 |
| -3  | -10 | -11 | 14.30  | 9.89  | 2 |
| -4  | -10 | -11 | -2.13  | 6.74  | 2 |
| -15 | 11  | 11  | 15.57  | 11.50 | 3 |
| -14 | 11  | 11  | -2.19  | 9.92  | 3 |
| -13 | 11  | 11  | 50.21  | 15.63 | 3 |
| -12 | 11  | 11  | 5.83   | 9.98  | 3 |
| 12  | -11 | -11 | -8.75  | 7.09  | 1 |
| 11  | -11 | -11 | 72.52  | 15.29 | 1 |
| 10  | -11 | -11 | 19.84  | 10.26 | 1 |
| 9   | -11 | -11 | -1.57  | 7.40  | 1 |

|     |     |     |        |       |   |
|-----|-----|-----|--------|-------|---|
| 8   | -11 | -11 | 14.13  | 10.12 | 1 |
| 7   | -11 | -11 | 65.26  | 15.02 | 1 |
| 6   | -11 | -11 | 180.41 | 21.95 | 1 |
| 5   | -11 | -11 | 181.75 | 22.36 | 1 |
| 4   | -11 | -11 | 55.83  | 12.89 | 1 |
| 3   | -11 | -11 | 5.42   | 7.09  | 1 |
| 2   | -11 | -11 | 60.83  | 13.39 | 1 |
| 1   | -11 | -11 | 22.23  | 9.89  | 1 |
| 0   | -11 | -11 | 23.24  | 9.04  | 1 |
| -1  | -11 | -11 | 7.02   | 8.09  | 1 |
| -2  | -11 | -11 | -3.01  | 7.71  | 2 |
| -2  | -11 | -11 | 5.75   | 9.06  | 1 |
| -3  | -11 | -11 | -4.71  | 7.06  | 2 |
| -14 | 12  | 11  | 25.08  | 13.86 | 3 |
| -13 | 12  | 11  | 0.67   | 10.15 | 3 |
| 12  | -12 | -11 | 18.63  | 10.68 | 1 |
| 11  | -12 | -11 | 3.83   | 8.78  | 1 |
| 10  | -12 | -11 | 14.83  | 9.48  | 1 |
| 9   | -12 | -11 | 3.95   | 8.33  | 1 |
| 8   | -12 | -11 | 9.39   | 9.24  | 1 |
| 7   | -12 | -11 | 3.07   | 10.01 | 1 |
| 6   | -12 | -11 | 100.07 | 18.34 | 1 |
| 5   | -12 | -11 | 7.09   | 10.10 | 1 |
| 4   | -12 | -11 | 10.93  | 7.99  | 1 |
| 3   | -12 | -11 | 3.64   | 7.53  | 1 |
| 2   | -12 | -11 | 3.03   | 8.61  | 1 |
| 1   | -12 | -11 | -0.37  | 7.92  | 1 |
| 0   | -12 | -11 | -3.59  | 7.14  | 1 |
| -1  | -12 | -11 | 55.46  | 15.21 | 1 |
| 12  | -13 | -11 | -0.73  | 8.25  | 1 |
| 11  | -13 | -11 | -0.23  | 8.45  | 1 |
| 10  | -13 | -11 | 14.17  | 9.01  | 1 |
| 9   | -13 | -11 | 4.01   | 9.07  | 1 |
| 8   | -13 | -11 | 97.92  | 17.83 | 1 |
| 7   | -13 | -11 | 52.64  | 13.90 | 1 |
| 6   | -13 | -11 | 7.29   | 9.90  | 1 |
| 5   | -13 | -11 | 55.23  | 14.94 | 1 |
| 4   | -13 | -11 | 26.65  | 11.62 | 1 |
| 3   | -13 | -11 | 7.18   | 8.01  | 1 |
| 2   | -13 | -11 | 35.61  | 12.26 | 1 |
| 1   | -13 | -11 | -4.50  | 8.62  | 1 |
| 0   | -13 | -11 | -4.75  | 10.02 | 1 |
| 11  | -14 | -11 | 7.73   | 8.71  | 1 |
| 10  | -14 | -11 | -2.84  | 7.75  | 1 |
| 9   | -14 | -11 | 25.65  | 11.23 | 1 |
| 8   | -14 | -11 | 3.66   | 9.16  | 1 |

|    |     |     |        |       |   |
|----|-----|-----|--------|-------|---|
| 7  | -14 | -11 | -0.48  | 7.92  | 1 |
| 6  | -14 | -11 | -7.42  | 7.30  | 1 |
| 5  | -14 | -11 | 2.75   | 8.12  | 1 |
| 4  | -14 | -11 | 23.92  | 11.71 | 1 |
| 3  | -14 | -11 | 22.70  | 13.20 | 1 |
| 2  | -14 | -11 | -5.89  | 8.23  | 1 |
| 8  | -15 | -11 | -4.76  | 7.37  | 1 |
| 7  | -15 | -11 | 1.75   | 7.69  | 1 |
| 0  | 19  | -12 | 9.48   | 8.81  | 1 |
| -1 | 19  | -12 | 26.35  | 10.83 | 1 |
| -2 | 19  | -12 | 32.75  | 10.61 | 1 |
| -3 | 19  | -12 | 13.61  | 8.21  | 1 |
| -3 | 19  | -12 | 29.70  | 11.20 | 2 |
| 3  | 18  | -12 | 13.92  | 9.55  | 1 |
| 2  | 18  | -12 | -5.10  | 7.15  | 1 |
| 1  | 18  | -12 | -0.07  | 6.40  | 1 |
| 0  | 18  | -12 | 30.76  | 9.84  | 1 |
| -1 | 18  | -12 | 45.47  | 11.23 | 1 |
| -2 | 18  | -12 | 1.03   | 5.89  | 1 |
| -2 | 18  | -12 | -1.02  | 7.58  | 2 |
| -3 | 18  | -12 | 34.69  | 10.01 | 1 |
| -3 | 18  | -12 | 28.94  | 11.69 | 2 |
| -4 | 18  | -12 | 39.63  | 12.85 | 2 |
| -5 | 18  | -12 | 4.75   | 7.86  | 2 |
| -6 | 18  | -12 | 33.21  | 12.63 | 2 |
| 5  | 17  | -12 | 1.47   | 6.19  | 1 |
| 4  | 17  | -12 | 12.94  | 6.68  | 1 |
| 3  | 17  | -12 | 2.56   | 6.62  | 1 |
| 2  | 17  | -12 | 20.53  | 8.03  | 1 |
| 1  | 17  | -12 | 21.53  | 8.93  | 1 |
| 0  | 17  | -12 | 79.81  | 14.45 | 1 |
| -1 | 17  | -12 | 16.62  | 7.30  | 1 |
| -2 | 17  | -12 | 79.01  | 15.43 | 2 |
| -2 | 17  | -12 | 91.10  | 14.43 | 1 |
| -3 | 17  | -12 | -3.08  | 4.74  | 1 |
| -3 | 17  | -12 | 6.45   | 9.45  | 2 |
| -4 | 17  | -12 | -2.15  | 7.28  | 2 |
| -5 | 17  | -12 | 55.73  | 14.04 | 2 |
| -6 | 17  | -12 | 78.11  | 17.41 | 2 |
| -7 | 17  | -12 | 327.54 | 29.69 | 2 |
| 7  | 16  | -12 | 0.59   | 6.07  | 1 |
| 6  | 16  | -12 | -6.26  | 5.94  | 1 |
| 5  | 16  | -12 | 3.41   | 7.69  | 1 |
| 4  | 16  | -12 | 41.86  | 12.03 | 1 |
| 3  | 16  | -12 | 6.10   | 6.00  | 1 |
| 2  | 16  | -12 | 210.41 | 21.92 | 1 |

|    |    |     |        |       |   |
|----|----|-----|--------|-------|---|
| 1  | 16 | -12 | 13.89  | 7.32  | 1 |
| 0  | 16 | -12 | 17.98  | 7.13  | 1 |
| -1 | 16 | -12 | 214.06 | 22.22 | 2 |
| -1 | 16 | -12 | 250.85 | 20.48 | 1 |
| -2 | 16 | -12 | 5.18   | 7.90  | 2 |
| -2 | 16 | -12 | 8.48   | 5.10  | 1 |
| -3 | 16 | -12 | 80.68  | 15.27 | 2 |
| -3 | 16 | -12 | 93.14  | 14.05 | 1 |
| -4 | 16 | -12 | 15.01  | 9.48  | 2 |
| -5 | 16 | -12 | 26.88  | 11.21 | 2 |
| -6 | 16 | -12 | 0.00   | 7.50  | 2 |
| -7 | 16 | -12 | 41.27  | 13.07 | 2 |
| -8 | 16 | -12 | 13.12  | 9.71  | 2 |
| 8  | 15 | -12 | 8.84   | 6.94  | 1 |
| 7  | 15 | -12 | -3.27  | 6.61  | 1 |
| 6  | 15 | -12 | 24.37  | 10.69 | 1 |
| 5  | 15 | -12 | 23.45  | 11.14 | 1 |
| 4  | 15 | -12 | 0.92   | 7.77  | 1 |
| 3  | 15 | -12 | 104.62 | 16.06 | 1 |
| 2  | 15 | -12 | -3.07  | 5.37  | 1 |
| 1  | 15 | -12 | 65.80  | 13.39 | 1 |
| 0  | 15 | -12 | -0.82  | 4.79  | 1 |
| -1 | 15 | -12 | 203.48 | 20.35 | 1 |
| -1 | 15 | -12 | 219.80 | 19.80 | 2 |
| -2 | 15 | -12 | 7.31   | 8.22  | 2 |
| -2 | 15 | -12 | 12.36  | 6.61  | 1 |
| -3 | 15 | -12 | 55.14  | 11.23 | 1 |
| -3 | 15 | -12 | 63.62  | 13.78 | 2 |
| -4 | 15 | -12 | 3.26   | 7.24  | 2 |
| -5 | 15 | -12 | 159.63 | 20.94 | 2 |
| -6 | 15 | -12 | 15.58  | 10.47 | 2 |
| -7 | 15 | -12 | 41.05  | 13.82 | 2 |
| -8 | 15 | -12 | 41.94  | 13.35 | 2 |
| -9 | 15 | -12 | 5.09   | 7.71  | 2 |
| 9  | 14 | -12 | 25.10  | 9.94  | 1 |
| 8  | 14 | -12 | -5.80  | 6.72  | 1 |
| 7  | 14 | -12 | 30.74  | 11.52 | 1 |
| 6  | 14 | -12 | 74.12  | 15.68 | 1 |
| 5  | 14 | -12 | 15.05  | 9.22  | 1 |
| 4  | 14 | -12 | 168.47 | 20.30 | 1 |
| 3  | 14 | -12 | 65.16  | 13.47 | 1 |
| 2  | 14 | -12 | 61.08  | 11.91 | 1 |
| 1  | 14 | -12 | 125.02 | 16.36 | 1 |
| 0  | 14 | -12 | -6.41  | 4.06  | 1 |
| -1 | 14 | -12 | 176.77 | 18.59 | 2 |
| -1 | 14 | -12 | 177.13 | 18.24 | 1 |



|     |    |     |        |       |   |
|-----|----|-----|--------|-------|---|
| -2  | 14 | -12 | 2.77   | 7.51  | 2 |
| -2  | 14 | -12 | 20.84  | 7.22  | 1 |
| -3  | 14 | -12 | 44.34  | 9.49  | 1 |
| -3  | 14 | -12 | 63.00  | 13.21 | 2 |
| -4  | 14 | -12 | 0.67   | 6.80  | 2 |
| -5  | 14 | -12 | 1.07   | 7.22  | 2 |
| -6  | 14 | -12 | 16.86  | 9.64  | 2 |
| -7  | 14 | -12 | 19.52  | 11.20 | 2 |
| -8  | 14 | -12 | 144.13 | 21.93 | 2 |
| -9  | 14 | -12 | 2.10   | 6.68  | 2 |
| -10 | 14 | -12 | -3.48  | 6.16  | 2 |
| 10  | 13 | -12 | 37.57  | 12.62 | 1 |
| 9   | 13 | -12 | -0.32  | 8.83  | 1 |
| 8   | 13 | -12 | 3.34   | 7.93  | 1 |
| 7   | 13 | -12 | 2.40   | 7.20  | 1 |
| 6   | 13 | -12 | 7.96   | 7.69  | 1 |
| 5   | 13 | -12 | 20.57  | 9.35  | 1 |
| 4   | 13 | -12 | 1.74   | 6.47  | 1 |
| 3   | 13 | -12 | 32.86  | 8.93  | 1 |
| 2   | 13 | -12 | 26.96  | 8.28  | 1 |
| 1   | 13 | -12 | 23.22  | 7.35  | 1 |
| 0   | 13 | -12 | 0.67   | 4.29  | 1 |
| -1  | 13 | -12 | 53.33  | 11.15 | 2 |
| -1  | 13 | -12 | 45.44  | 10.16 | 1 |
| -2  | 13 | -12 | 96.87  | 14.75 | 2 |
| -2  | 13 | -12 | 100.66 | 13.65 | 1 |
| -3  | 13 | -12 | 43.81  | 11.00 | 2 |
| -3  | 13 | -12 | 44.22  | 9.87  | 1 |
| -4  | 13 | -12 | 70.91  | 13.89 | 2 |
| -5  | 13 | -12 | 12.88  | 8.68  | 2 |
| -6  | 13 | -12 | 2.36   | 7.30  | 2 |
| -7  | 13 | -12 | 21.89  | 10.88 | 2 |
| -8  | 13 | -12 | 31.90  | 12.03 | 2 |
| -9  | 13 | -12 | 17.86  | 9.68  | 2 |
| -10 | 13 | -12 | 2.04   | 6.32  | 2 |
| 11  | 12 | -12 | -0.83  | 7.57  | 1 |
| 10  | 12 | -12 | 31.89  | 12.08 | 1 |
| 9   | 12 | -12 | 4.90   | 8.05  | 1 |
| 8   | 12 | -12 | 12.07  | 8.32  | 1 |
| 7   | 12 | -12 | 8.12   | 8.41  | 1 |
| 6   | 12 | -12 | 43.13  | 11.52 | 1 |
| 5   | 12 | -12 | 120.05 | 16.94 | 1 |
| 4   | 12 | -12 | 56.40  | 12.05 | 1 |
| 3   | 12 | -12 | -2.87  | 4.80  | 1 |
| 2   | 12 | -12 | -1.55  | 4.37  | 1 |
| 1   | 12 | -12 | 3.79   | 4.22  | 1 |

|     |    |     |        |       |   |
|-----|----|-----|--------|-------|---|
| 0   | 12 | -12 | 12.38  | 6.29  | 1 |
| 0   | 12 | -12 | 2.88   | 5.16  | 2 |
| -1  | 12 | -12 | 19.26  | 7.93  | 2 |
| -1  | 12 | -12 | 29.29  | 7.59  | 1 |
| -2  | 12 | -12 | 51.67  | 11.39 | 2 |
| -2  | 12 | -12 | 45.80  | 9.85  | 1 |
| -3  | 12 | -12 | 20.39  | 7.33  | 1 |
| -3  | 12 | -12 | 35.74  | 10.80 | 2 |
| -4  | 12 | -12 | 28.31  | 9.92  | 2 |
| -5  | 12 | -12 | 58.03  | 13.22 | 2 |
| -6  | 12 | -12 | 71.18  | 15.03 | 2 |
| -7  | 12 | -12 | 17.26  | 9.47  | 2 |
| -8  | 12 | -12 | 48.06  | 12.46 | 2 |
| -9  | 12 | -12 | 81.23  | 16.29 | 2 |
| -10 | 12 | -12 | -3.80  | 5.48  | 2 |
| 11  | 11 | -12 | 66.47  | 13.98 | 1 |
| 10  | 11 | -12 | 6.36   | 7.46  | 1 |
| 9   | 11 | -12 | 14.32  | 8.96  | 1 |
| 8   | 11 | -12 | 28.74  | 9.73  | 1 |
| 7   | 11 | -12 | 46.34  | 12.04 | 1 |
| 6   | 11 | -12 | 4.55   | 7.03  | 1 |
| 5   | 11 | -12 | 86.70  | 14.53 | 1 |
| 4   | 11 | -12 | 23.96  | 8.47  | 1 |
| 3   | 11 | -12 | 1.66   | 4.95  | 1 |
| 2   | 11 | -12 | -1.92  | 4.68  | 1 |
| 1   | 11 | -12 | 133.88 | 15.28 | 1 |
| 0   | 11 | -12 | 99.73  | 13.39 | 1 |
| -1  | 11 | -12 | 162.50 | 15.85 | 1 |
| -1  | 11 | -12 | 146.10 | 15.63 | 2 |
| -2  | 11 | -12 | 17.90  | 6.45  | 1 |
| -2  | 11 | -12 | 12.29  | 7.85  | 2 |
| -3  | 11 | -12 | 30.01  | 7.34  | 1 |
| -3  | 11 | -12 | 33.66  | 9.70  | 2 |
| -4  | 11 | -12 | 111.30 | 15.91 | 2 |
| -5  | 11 | -12 | 24.28  | 9.24  | 2 |
| -6  | 11 | -12 | 36.92  | 10.76 | 2 |
| -7  | 11 | -12 | 25.39  | 10.04 | 2 |
| -8  | 11 | -12 | 11.66  | 8.54  | 2 |
| -9  | 11 | -12 | 8.87   | 8.68  | 2 |
| -10 | 11 | -12 | -11.07 | 5.24  | 2 |
| -11 | 11 | -12 | 1.15   | 6.07  | 2 |
| 11  | 10 | -12 | 20.35  | 10.89 | 1 |
| 10  | 10 | -12 | 0.45   | 7.25  | 1 |
| 9   | 10 | -12 | 42.59  | 11.50 | 1 |
| 8   | 10 | -12 | 31.02  | 10.14 | 1 |
| 7   | 10 | -12 | 17.27  | 8.21  | 1 |

|     |    |     |        |       |   |
|-----|----|-----|--------|-------|---|
| 6   | 10 | -12 | 15.68  | 7.82  | 1 |
| 5   | 10 | -12 | 15.05  | 6.88  | 1 |
| 4   | 10 | -12 | 40.73  | 9.37  | 1 |
| 3   | 10 | -12 | 13.54  | 6.19  | 1 |
| 2   | 10 | -12 | 11.90  | 5.70  | 1 |
| 1   | 10 | -12 | 60.14  | 10.68 | 1 |
| 0   | 10 | -12 | 24.00  | 6.39  | 2 |
| 0   | 10 | -12 | 29.70  | 7.13  | 1 |
| -1  | 10 | -12 | 2.77   | 3.87  | 1 |
| -1  | 10 | -12 | 9.88   | 5.70  | 2 |
| -2  | 10 | -12 | 61.97  | 11.65 | 2 |
| -2  | 10 | -12 | 79.82  | 11.04 | 1 |
| -3  | 10 | -12 | 6.95   | 4.28  | 1 |
| -3  | 10 | -12 | 4.80   | 6.66  | 2 |
| -4  | 10 | -12 | 122.18 | 15.92 | 2 |
| -5  | 10 | -12 | 421.31 | 28.69 | 2 |
| -6  | 10 | -12 | 25.97  | 9.97  | 2 |
| -7  | 10 | -12 | 27.50  | 10.89 | 2 |
| -8  | 10 | -12 | 8.87   | 8.10  | 2 |
| -9  | 10 | -12 | 19.43  | 9.99  | 2 |
| -10 | 10 | -12 | 0.10   | 6.91  | 2 |
| -11 | 10 | -12 | 5.13   | 5.26  | 2 |
| 11  | 9  | -12 | -0.24  | 7.59  | 1 |
| 10  | 9  | -12 | 23.51  | 9.72  | 1 |
| 9   | 9  | -12 | 108.81 | 16.06 | 1 |
| 8   | 9  | -12 | 52.43  | 11.79 | 1 |
| 7   | 9  | -12 | 33.30  | 10.23 | 1 |
| 6   | 9  | -12 | 240.44 | 20.26 | 1 |
| 5   | 9  | -12 | 100.44 | 14.42 | 1 |
| 4   | 9  | -12 | 132.54 | 15.34 | 1 |
| 3   | 9  | -12 | 14.46  | 6.06  | 1 |
| 2   | 9  | -12 | 4.07   | 3.76  | 1 |
| 1   | 9  | -12 | 417.05 | 24.82 | 1 |
| 0   | 9  | -12 | 12.39  | 5.83  | 1 |
| 0   | 9  | -12 | 16.20  | 5.60  | 2 |
| -1  | 9  | -12 | 39.62  | 8.54  | 1 |
| -1  | 9  | -12 | 24.64  | 6.36  | 2 |
| -2  | 9  | -12 | 12.40  | 6.07  | 2 |
| -2  | 9  | -12 | 11.41  | 4.81  | 1 |
| -3  | 9  | -12 | 1.02   | 5.38  | 2 |
| -3  | 9  | -12 | 5.44   | 4.09  | 1 |
| -4  | 9  | -12 | 15.88  | 7.94  | 2 |
| -5  | 9  | -12 | 10.26  | 6.37  | 2 |
| -6  | 9  | -12 | 92.36  | 15.74 | 2 |
| -7  | 9  | -12 | -0.33  | 6.18  | 2 |
| -8  | 9  | -12 | 4.95   | 7.17  | 2 |

|     |       |        |       |   |
|-----|-------|--------|-------|---|
| -9  | 9 -12 | -4.53  | 5.68  | 2 |
| -10 | 9 -12 | -6.80  | 5.60  | 2 |
| -11 | 9 -12 | -2.01  | 5.29  | 2 |
| 11  | 8 -12 | 144.90 | 18.17 | 1 |
| 10  | 8 -12 | 905.81 | 44.58 | 1 |
| 9   | 8 -12 | 7.84   | 6.90  | 1 |
| 8   | 8 -12 | 34.23  | 9.90  | 1 |
| 7   | 8 -12 | 332.24 | 23.64 | 1 |
| 6   | 8 -12 | 1.72   | 5.52  | 1 |
| 5   | 8 -12 | 730.48 | 36.47 | 1 |
| 4   | 8 -12 | 19.19  | 6.71  | 1 |
| 3   | 8 -12 | 438.63 | 25.66 | 1 |
| 2   | 8 -12 | 199.32 | 16.30 | 1 |
| 1   | 8 -12 | 9.60   | 4.89  | 1 |
| 0   | 8 -12 | 24.38  | 6.46  | 2 |
| 0   | 8 -12 | 37.52  | 7.79  | 1 |
| -1  | 8 -12 | 0.13   | 2.97  | 2 |
| -1  | 8 -12 | 7.92   | 4.51  | 1 |
| -2  | 8 -12 | 82.39  | 10.72 | 1 |
| -2  | 8 -12 | 88.14  | 12.21 | 2 |
| -3  | 8 -12 | 489.27 | 24.64 | 1 |
| -3  | 8 -12 | 438.24 | 27.40 | 2 |
| -4  | 8 -12 | 7.31   | 6.75  | 2 |
| -5  | 8 -12 | 24.40  | 8.92  | 2 |
| -6  | 8 -12 | 226.64 | 22.05 | 2 |
| -7  | 8 -12 | -1.81  | 5.74  | 2 |
| -8  | 8 -12 | -3.10  | 5.73  | 2 |
| -9  | 8 -12 | 20.98  | 9.56  | 2 |
| -10 | 8 -12 | 3.64   | 6.39  | 2 |
| -11 | 8 -12 | -6.14  | 4.75  | 2 |
| -14 | -7 12 | 66.60  | 16.24 | 3 |
| -13 | -7 12 | 50.15  | 13.29 | 3 |
| -12 | -7 12 | 37.31  | 11.53 | 3 |
| 12  | 7 -12 | 72.37  | 14.14 | 1 |
| 11  | 7 -12 | 15.60  | 8.55  | 1 |
| -11 | -7 12 | 9.34   | 6.78  | 3 |
| 10  | 7 -12 | 50.63  | 12.29 | 1 |
| -10 | -7 12 | 37.06  | 9.90  | 3 |
| 9   | 7 -12 | 565.32 | 31.99 | 1 |
| -9  | -7 12 | 544.54 | 30.99 | 3 |
| 8   | 7 -12 | 189.36 | 18.96 | 1 |
| -8  | -7 12 | 190.12 | 16.84 | 3 |
| -7  | -7 12 | 181.51 | 15.57 | 3 |
| 7   | 7 -12 | 159.74 | 17.33 | 1 |
| 6   | 7 -12 | 86.12  | 13.57 | 1 |
| -6  | -7 12 | 88.88  | 11.94 | 3 |

|     |    |     |        |       |   |
|-----|----|-----|--------|-------|---|
| 5   | 7  | -12 | 12.27  | 7.23  | 1 |
| -5  | -7 | 12  | 8.18   | 5.69  | 3 |
| 4   | 7  | -12 | 224.43 | 17.88 | 1 |
| -4  | -7 | 12  | 236.98 | 17.37 | 3 |
| 3   | 7  | -12 | 706.85 | 34.21 | 1 |
| 2   | 7  | -12 | 5.60   | 4.05  | 1 |
| 1   | 7  | -12 | 120.33 | 13.15 | 1 |
| 0   | 7  | -12 | 41.84  | 7.64  | 2 |
| 0   | 7  | -12 | 41.01  | 8.34  | 1 |
| -1  | 7  | -12 | 130.35 | 13.16 | 1 |
| -2  | 7  | -12 | 24.16  | 6.09  | 1 |
| -2  | 7  | -12 | 7.52   | 4.64  | 2 |
| -3  | 7  | -12 | 12.23  | 6.06  | 2 |
| -3  | 7  | -12 | 15.05  | 5.48  | 1 |
| -4  | 7  | -12 | 360.47 | 24.22 | 2 |
| -5  | 7  | -12 | 5.22   | 6.35  | 2 |
| -6  | 7  | -12 | 130.79 | 17.51 | 2 |
| -7  | 7  | -12 | -2.92  | 5.63  | 2 |
| -8  | 7  | -12 | 36.52  | 11.74 | 2 |
| -9  | 7  | -12 | 5.82   | 7.39  | 2 |
| -10 | 7  | -12 | 0.01   | 6.88  | 2 |
| -11 | 7  | -12 | -6.91  | 4.27  | 2 |
| -15 | -6 | 12  | 0.57   | 8.77  | 3 |
| -14 | -6 | 12  | -5.36  | 8.10  | 3 |
| -13 | -6 | 12  | 141.57 | 19.40 | 3 |
| 12  | 6  | -12 | 243.90 | 21.06 | 1 |
| -12 | -6 | 12  | 217.28 | 22.51 | 3 |
| -11 | -6 | 12  | 69.55  | 13.02 | 3 |
| 11  | 6  | -12 | 80.45  | 13.78 | 1 |
| -10 | -6 | 12  | 31.51  | 9.75  | 3 |
| 10  | 6  | -12 | 46.15  | 11.58 | 1 |
| -9  | -6 | 12  | 255.84 | 20.26 | 3 |
| 9   | 6  | -12 | 224.83 | 19.54 | 1 |
| 8   | 6  | -12 | 58.42  | 11.47 | 1 |
| -8  | -6 | 12  | 62.32  | 10.96 | 3 |
| -7  | -6 | 12  | 104.40 | 12.91 | 3 |
| 7   | 6  | -12 | 106.75 | 14.50 | 1 |
| -6  | -6 | 12  | 315.39 | 20.91 | 3 |
| 6   | 6  | -12 | 365.22 | 23.64 | 1 |
| 5   | 6  | -12 | 832.95 | 38.21 | 1 |
| -5  | -6 | 12  | 776.09 | 36.17 | 3 |
| 4   | 6  | -12 | 31.65  | 7.59  | 1 |
| 3   | 6  | -12 | 53.69  | 9.77  | 1 |
| 2   | 6  | -12 | 9.25   | 4.53  | 1 |
| 1   | 6  | -12 | 43.71  | 8.53  | 1 |
| 1   | 6  | -12 | 20.45  | 5.42  | 2 |

|     |    |     |        |       |   |
|-----|----|-----|--------|-------|---|
| 0   | 6  | -12 | 72.67  | 9.70  | 2 |
| 0   | 6  | -12 | 78.10  | 10.62 | 1 |
| -1  | 6  | -12 | 49.46  | 8.73  | 1 |
| -2  | 6  | -12 | 29.48  | 7.77  | 2 |
| -2  | 6  | -12 | 37.27  | 7.12  | 1 |
| -3  | 6  | -12 | 72.94  | 12.19 | 2 |
| -3  | 6  | -12 | 60.79  | 9.26  | 1 |
| -4  | 6  | -12 | 48.26  | 10.72 | 2 |
| -5  | 6  | -12 | 46.81  | 10.99 | 2 |
| -6  | 6  | -12 | 2.96   | 6.11  | 2 |
| -7  | 6  | -12 | 209.90 | 21.59 | 2 |
| -8  | 6  | -12 | 20.43  | 9.66  | 2 |
| -9  | 6  | -12 | 10.92  | 7.80  | 2 |
| -10 | 6  | -12 | 11.21  | 7.86  | 2 |
| -11 | 6  | -12 | -5.71  | 3.92  | 2 |
| -15 | -5 | 12  | -1.44  | 8.63  | 3 |
| -14 | -5 | 12  | 136.27 | 20.14 | 3 |
| -13 | -5 | 12  | -1.12  | 7.34  | 3 |
| -12 | -5 | 12  | 26.63  | 10.00 | 3 |
| 12  | 5  | -12 | 31.81  | 9.82  | 1 |
| -11 | -5 | 12  | 536.18 | 32.22 | 3 |
| 11  | 5  | -12 | 514.77 | 30.28 | 1 |
| 10  | 5  | -12 | 4.23   | 6.11  | 1 |
| -10 | -5 | 12  | -1.70  | 6.39  | 3 |
| 9   | 5  | -12 | 15.46  | 6.95  | 1 |
| -9  | -5 | 12  | 15.43  | 7.41  | 3 |
| -8  | -5 | 12  | 16.45  | 7.34  | 3 |
| 8   | 5  | -12 | 4.30   | 6.05  | 1 |
| 7   | 5  | -12 | 0.95   | 5.01  | 1 |
| -7  | -5 | 12  | -9.00  | 3.13  | 3 |
| -6  | -5 | 12  | 821.44 | 37.97 | 3 |
| 6   | 5  | -12 | 853.79 | 39.55 | 1 |
| 5   | 5  | -12 | -3.35  | 3.89  | 1 |
| -5  | -5 | 12  | 11.69  | 5.82  | 3 |
| 4   | 5  | -12 | 122.61 | 13.62 | 1 |
| 3   | 5  | -12 | 5.74   | 4.26  | 1 |
| 2   | 5  | -12 | 116.06 | 12.83 | 1 |
| 1   | 5  | -12 | -4.97  | 2.85  | 2 |
| 1   | 5  | -12 | -1.45  | 2.23  | 1 |
| 0   | 5  | -12 | 2.60   | 3.21  | 1 |
| 0   | 5  | -12 | -2.15  | 2.94  | 2 |
| -2  | 5  | -12 | 75.49  | 11.38 | 2 |
| -2  | 5  | -12 | 80.29  | 10.23 | 1 |
| -3  | 5  | -12 | 195.49 | 17.40 | 2 |
| -3  | 5  | -12 | 231.61 | 16.05 | 1 |
| -4  | 5  | -12 | 29.70  | 9.24  | 2 |

|     |    |     |        |       |   |
|-----|----|-----|--------|-------|---|
| -5  | 5  | -12 | 42.99  | 11.54 | 2 |
| -6  | 5  | -12 | 205.48 | 21.26 | 2 |
| -7  | 5  | -12 | 499.86 | 32.27 | 2 |
| -8  | 5  | -12 | 16.67  | 9.35  | 2 |
| -9  | 5  | -12 | 29.59  | 11.20 | 2 |
| -10 | 5  | -12 | 11.33  | 8.02  | 2 |
| -11 | 5  | -12 | -0.76  | 5.20  | 2 |
| -16 | -4 | 12  | 0.73   | 10.68 | 3 |
| -15 | -4 | 12  | 85.44  | 17.88 | 3 |
| -14 | -4 | 12  | 55.04  | 14.18 | 3 |
| -13 | -4 | 12  | -2.47  | 7.19  | 3 |
| 12  | 4  | -12 | 22.28  | 8.28  | 1 |
| -12 | -4 | 12  | 28.87  | 10.70 | 3 |
| -11 | -4 | 12  | 0.24   | 6.04  | 3 |
| 11  | 4  | -12 | 6.33   | 7.40  | 1 |
| -10 | -4 | 12  | 37.81  | 9.64  | 3 |
| 10  | 4  | -12 | 38.77  | 10.08 | 1 |
| 9   | 4  | -12 | -0.50  | 4.96  | 1 |
| -9  | -4 | 12  | 5.97   | 6.26  | 3 |
| -8  | -4 | 12  | 39.07  | 9.42  | 3 |
| 8   | 4  | -12 | 30.72  | 8.81  | 1 |
| 7   | 4  | -12 | 7.46   | 6.07  | 1 |
| -7  | -4 | 12  | 21.38  | 7.10  | 3 |
| 6   | 4  | -12 | 11.24  | 5.75  | 1 |
| -6  | -4 | 12  | 6.62   | 5.04  | 3 |
| 5   | 4  | -12 | 350.39 | 22.65 | 1 |
| -5  | -4 | 12  | 381.18 | 23.60 | 3 |
| 4   | 4  | -12 | 115.44 | 13.10 | 1 |
| 3   | 4  | -12 | 340.18 | 20.79 | 1 |
| 2   | 4  | -12 | 822.56 | 36.10 | 1 |
| 1   | 4  | -12 | 0.32   | 3.26  | 1 |
| 1   | 4  | -12 | -2.25  | 3.45  | 2 |
| 0   | 4  | -12 | 5.47   | 3.67  | 1 |
| 0   | 4  | -12 | -1.88  | 3.35  | 2 |
| -1  | 4  | -12 | 383.06 | 21.28 | 1 |
| -2  | 4  | -12 | 158.22 | 14.02 | 2 |
| -2  | 4  | -12 | 170.67 | 13.42 | 1 |
| -3  | 4  | -12 | 435.27 | 22.79 | 1 |
| -3  | 4  | -12 | 412.15 | 24.78 | 2 |
| -4  | 4  | -12 | 268.58 | 20.44 | 2 |
| -5  | 4  | -12 | 374.37 | 25.29 | 2 |
| -6  | 4  | -12 | 0.76   | 5.19  | 2 |
| -7  | 4  | -12 | -2.76  | 5.68  | 2 |
| -8  | 4  | -12 | 114.32 | 17.94 | 2 |
| -9  | 4  | -12 | 0.36   | 6.39  | 2 |
| -10 | 4  | -12 | -5.11  | 5.81  | 2 |

|     |    |     |        |       |   |
|-----|----|-----|--------|-------|---|
| -11 | 4  | -12 | -2.39  | 4.75  | 2 |
| -16 | -3 | 12  | 33.19  | 13.03 | 3 |
| -15 | -3 | 12  | 59.44  | 16.06 | 3 |
| -14 | -3 | 12  | 91.55  | 16.24 | 3 |
| -13 | -3 | 12  | 30.65  | 10.87 | 3 |
| 12  | 3  | -12 | 44.53  | 10.88 | 1 |
| -12 | -3 | 12  | 37.25  | 11.30 | 3 |
| -11 | -3 | 12  | 53.59  | 12.33 | 3 |
| 11  | 3  | -12 | 56.71  | 11.59 | 1 |
| -10 | -3 | 12  | 107.46 | 15.47 | 3 |
| 10  | 3  | -12 | 99.14  | 14.39 | 1 |
| 9   | 3  | -12 | 0.66   | 4.86  | 1 |
| -9  | -3 | 12  | 7.34   | 5.95  | 3 |
| -8  | -3 | 12  | 119.84 | 14.76 | 3 |
| 8   | 3  | -12 | 136.04 | 15.48 | 1 |
| -7  | -3 | 12  | -1.22  | 4.17  | 3 |
| 7   | 3  | -12 | -0.71  | 3.83  | 1 |
| 6   | 3  | -12 | 92.05  | 12.63 | 1 |
| -6  | -3 | 12  | 60.74  | 10.80 | 3 |
| 5   | 3  | -12 | 472.44 | 26.32 | 1 |
| -5  | -3 | 12  | 473.39 | 27.24 | 3 |
| 4   | 3  | -12 | 287.19 | 18.74 | 1 |
| 3   | 3  | -12 | 0.47   | 2.77  | 1 |
| 2   | 3  | -12 | 113.80 | 12.35 | 1 |
| 1   | 3  | -12 | 317.55 | 17.79 | 2 |
| 1   | 3  | -12 | 300.56 | 18.91 | 1 |
| 0   | 3  | -12 | 43.67  | 8.03  | 2 |
| 0   | 3  | -12 | 31.20  | 7.28  | 1 |
| -1  | 3  | -12 | 47.49  | 8.76  | 2 |
| -1  | 3  | -12 | 57.54  | 8.94  | 1 |
| -2  | 3  | -12 | 4.07   | 3.67  | 1 |
| -2  | 3  | -12 | 4.62   | 4.45  | 2 |
| -3  | 3  | -12 | 144.03 | 12.26 | 1 |
| -3  | 3  | -12 | 117.21 | 14.38 | 2 |
| -4  | 3  | -12 | 94.09  | 13.95 | 2 |
| -5  | 3  | -12 | 156.72 | 17.88 | 2 |
| -6  | 3  | -12 | 19.94  | 8.63  | 2 |
| -7  | 3  | -12 | 2.26   | 6.39  | 2 |
| -8  | 3  | -12 | 114.32 | 18.18 | 2 |
| -9  | 3  | -12 | 2.15   | 6.75  | 2 |
| -10 | 3  | -12 | 0.92   | 6.00  | 2 |
| -16 | -2 | 12  | 4.24   | 10.86 | 3 |
| -15 | -2 | 12  | 5.55   | 8.13  | 3 |
| -14 | -2 | 12  | 16.31  | 8.91  | 3 |
| -13 | -2 | 12  | 15.80  | 8.32  | 3 |
| 12  | 2  | -12 | 82.15  | 13.41 | 1 |



|     |    |     |        |       |   |
|-----|----|-----|--------|-------|---|
| -12 | -2 | 12  | 83.29  | 15.20 | 3 |
| 11  | 2  | -12 | 120.39 | 15.30 | 1 |
| -11 | -2 | 12  | 136.81 | 17.49 | 3 |
| 10  | 2  | -12 | 300.40 | 21.81 | 1 |
| -10 | -2 | 12  | 262.47 | 21.43 | 3 |
| -9  | -2 | 12  | 35.49  | 9.65  | 3 |
| 9   | 2  | -12 | 24.88  | 8.21  | 1 |
| 8   | 2  | -12 | 6.51   | 5.05  | 1 |
| -8  | -2 | 12  | 6.71   | 5.61  | 3 |
| -7  | -2 | 12  | 51.13  | 10.98 | 3 |
| 7   | 2  | -12 | 52.78  | 10.13 | 1 |
| 6   | 2  | -12 | 38.04  | 9.38  | 1 |
| -6  | -2 | 12  | 48.89  | 10.39 | 3 |
| 5   | 2  | -12 | 782.16 | 35.77 | 1 |
| -5  | -2 | 12  | 747.82 | 36.89 | 3 |
| 4   | 2  | -12 | 215.36 | 16.38 | 1 |
| 3   | 2  | -12 | 13.49  | 4.77  | 1 |
| 2   | 2  | -12 | 75.77  | 10.31 | 1 |
| 1   | 2  | -12 | 57.79  | 9.11  | 1 |
| 1   | 2  | -12 | 52.38  | 8.19  | 2 |
| 0   | 2  | -12 | 8.72   | 4.69  | 1 |
| 0   | 2  | -12 | 15.88  | 5.98  | 2 |
| -1  | 2  | -12 | 207.68 | 15.77 | 2 |
| -1  | 2  | -12 | 239.03 | 16.09 | 1 |
| -2  | 2  | -12 | 247.37 | 16.34 | 1 |
| -2  | 2  | -12 | 210.93 | 16.58 | 2 |
| -3  | 2  | -12 | 437.92 | 22.81 | 1 |
| -3  | 2  | -12 | 418.40 | 25.27 | 2 |
| -4  | 2  | -12 | 87.23  | 13.94 | 2 |
| -5  | 2  | -12 | 32.27  | 9.98  | 2 |
| -6  | 2  | -12 | 129.92 | 18.09 | 2 |
| -7  | 2  | -12 | 195.47 | 22.14 | 2 |
| -8  | 2  | -12 | 39.79  | 12.01 | 2 |
| -9  | 2  | -12 | 8.36   | 9.03  | 2 |
| -10 | 2  | -12 | -4.39  | 5.35  | 2 |
| -16 | -1 | 12  | 27.08  | 13.13 | 3 |
| -15 | -1 | 12  | 8.32   | 8.34  | 3 |
| -14 | -1 | 12  | -1.41  | 6.37  | 3 |
| -13 | -1 | 12  | 17.94  | 8.37  | 3 |
| 12  | 1  | -12 | 51.05  | 11.26 | 1 |
| -12 | -1 | 12  | 20.32  | 9.13  | 3 |
| -11 | -1 | 12  | -4.74  | 5.63  | 3 |
| 11  | 1  | -12 | 2.31   | 6.65  | 1 |
| 10  | 1  | -12 | 10.92  | 6.44  | 1 |
| -10 | -1 | 12  | -0.99  | 5.37  | 3 |
| -9  | -1 | 12  | 20.88  | 8.09  | 3 |

|     |    |     |         |       |   |
|-----|----|-----|---------|-------|---|
| 9   | 1  | -12 | 40.25   | 9.88  | 1 |
| 8   | 1  | -12 | 2.21    | 5.07  | 1 |
| -8  | -1 | 12  | 0.14    | 4.97  | 3 |
| 7   | 1  | -12 | 19.09   | 7.19  | 1 |
| -7  | -1 | 12  | 13.14   | 6.59  | 3 |
| -6  | -1 | 12  | 30.10   | 9.08  | 3 |
| 6   | 1  | -12 | 15.80   | 6.51  | 1 |
| 5   | 1  | -12 | 101.90  | 12.65 | 1 |
| 4   | 1  | -12 | 921.88  | 39.54 | 1 |
| 3   | 1  | -12 | 1318.75 | 50.87 | 1 |
| 2   | 1  | -12 | 139.43  | 12.34 | 1 |
| 1   | 1  | -12 | 31.81   | 7.04  | 1 |
| 1   | 1  | -12 | 35.49   | 7.26  | 2 |
| 0   | 1  | -12 | 100.86  | 11.02 | 2 |
| -1  | 1  | -12 | 11.56   | 5.66  | 2 |
| -1  | 1  | -12 | 10.86   | 4.08  | 1 |
| -2  | 1  | -12 | 260.15  | 16.81 | 1 |
| -2  | 1  | -12 | 228.13  | 17.64 | 2 |
| -3  | 1  | -12 | 0.46    | 4.91  | 2 |
| -3  | 1  | -12 | -5.38   | 3.06  | 1 |
| -4  | 1  | -12 | 7.76    | 5.92  | 2 |
| -5  | 1  | -12 | 36.53   | 10.49 | 2 |
| -6  | 1  | -12 | 26.34   | 9.58  | 2 |
| -7  | 1  | -12 | 31.76   | 11.81 | 2 |
| -8  | 1  | -12 | -8.63   | 6.41  | 2 |
| -9  | 1  | -12 | 1.15    | 7.61  | 2 |
| -10 | 1  | -12 | 5.01    | 6.03  | 2 |
| -16 | 0  | 12  | 2.78    | 8.16  | 3 |
| -15 | 0  | 12  | 49.45   | 13.63 | 3 |
| -14 | 0  | 12  | 109.18  | 18.23 | 3 |
| -13 | 0  | 12  | -3.07   | 5.93  | 3 |
| 12  | 0  | -12 | 117.73  | 14.73 | 1 |
| -12 | 0  | 12  | 100.00  | 16.87 | 3 |
| -11 | 0  | 12  | 218.61  | 21.24 | 3 |
| 11  | 0  | -12 | 212.96  | 18.72 | 1 |
| 10  | 0  | -12 | 155.97  | 15.77 | 1 |
| -10 | 0  | 12  | 133.82  | 16.97 | 3 |
| 9   | 0  | -12 | -2.31   | 5.07  | 1 |
| -9  | 0  | 12  | -2.93   | 3.99  | 3 |
| -8  | 0  | 12  | 18.12   | 7.98  | 3 |
| 8   | 0  | -12 | 24.19   | 7.48  | 1 |
| -7  | 0  | 12  | 4.18    | 5.29  | 3 |
| 7   | 0  | -12 | 3.05    | 4.92  | 1 |
| -6  | 0  | 12  | 88.72   | 13.98 | 3 |
| 6   | 0  | -12 | 88.51   | 12.73 | 1 |
| 5   | 0  | -12 | 100.05  | 12.81 | 1 |

|     |    |     |        |       |   |
|-----|----|-----|--------|-------|---|
| 4   | 0  | -12 | 3.40   | 3.55  | 1 |
| 3   | 0  | -12 | 1.83   | 3.56  | 1 |
| 2   | 0  | -12 | 6.50   | 4.08  | 2 |
| 2   | 0  | -12 | 9.42   | 4.38  | 1 |
| 1   | 0  | -12 | 26.95  | 6.40  | 2 |
| 1   | 0  | -12 | 25.52  | 6.70  | 1 |
| 0   | 0  | -12 | -0.06  | 2.71  | 1 |
| 0   | 0  | -12 | 5.43   | 3.69  | 2 |
| -1  | 0  | -12 | 10.39  | 4.62  | 1 |
| -1  | 0  | -12 | 14.18  | 5.90  | 2 |
| -2  | 0  | -12 | 43.56  | 8.14  | 1 |
| -2  | 0  | -12 | 14.45  | 6.23  | 2 |
| -3  | 0  | -12 | 54.19  | 8.99  | 1 |
| -3  | 0  | -12 | 31.16  | 8.55  | 2 |
| -4  | 0  | -12 | 4.32   | 5.77  | 2 |
| -5  | 0  | -12 | 76.07  | 14.54 | 2 |
| -6  | 0  | -12 | 9.56   | 8.85  | 2 |
| -7  | 0  | -12 | 38.88  | 12.36 | 2 |
| -9  | 0  | -12 | 0.83   | 7.54  | 2 |
| -16 | 1  | 12  | 11.22  | 10.06 | 3 |
| -15 | 1  | 12  | 51.10  | 13.47 | 3 |
| -14 | 1  | 12  | 95.74  | 16.93 | 3 |
| -13 | 1  | 12  | 6.02   | 6.32  | 3 |
| 12  | -1 | -12 | -3.88  | 5.00  | 1 |
| -12 | 1  | 12  | -2.74  | 5.20  | 3 |
| 11  | -1 | -12 | 4.09   | 6.40  | 1 |
| -11 | 1  | 12  | 2.11   | 5.17  | 3 |
| 10  | -1 | -12 | 0.01   | 5.13  | 1 |
| -10 | 1  | 12  | -4.42  | 4.74  | 3 |
| 9   | -1 | -12 | 318.81 | 22.18 | 1 |
| -9  | 1  | 12  | 325.78 | 23.84 | 3 |
| 8   | -1 | -12 | 28.49  | 8.54  | 1 |
| -8  | 1  | 12  | 30.94  | 9.55  | 3 |
| -7  | 1  | 12  | 477.95 | 29.58 | 3 |
| 7   | -1 | -12 | 490.75 | 27.47 | 1 |
| -6  | 1  | 12  | 57.64  | 12.17 | 3 |
| 6   | -1 | -12 | 59.91  | 10.87 | 1 |
| 5   | -1 | -12 | 74.71  | 11.52 | 1 |
| 4   | -1 | -12 | 72.31  | 10.82 | 1 |
| 3   | -1 | -12 | 25.85  | 6.77  | 1 |
| 2   | -1 | -12 | 7.93   | 4.67  | 2 |
| 2   | -1 | -12 | 9.05   | 4.32  | 1 |
| 1   | -1 | -12 | 0.22   | 3.47  | 1 |
| 1   | -1 | -12 | 3.47   | 4.19  | 2 |
| 0   | -1 | -12 | -4.19  | 3.00  | 1 |
| 0   | -1 | -12 | 3.82   | 4.44  | 2 |

|     |    |     |        |       |   |
|-----|----|-----|--------|-------|---|
| -1  | -1 | -12 | 1.72   | 3.92  | 1 |
| -1  | -1 | -12 | 2.19   | 4.26  | 2 |
| -2  | -1 | -12 | 1.15   | 5.54  | 2 |
| -2  | -1 | -12 | 3.42   | 4.20  | 1 |
| -3  | -1 | -12 | -0.75  | 4.04  | 1 |
| -3  | -1 | -12 | -1.96  | 5.00  | 2 |
| -4  | -1 | -12 | 9.10   | 6.77  | 2 |
| -5  | -1 | -12 | -0.13  | 6.29  | 2 |
| -6  | -1 | -12 | 101.52 | 17.82 | 2 |
| -7  | -1 | -12 | 35.77  | 11.57 | 2 |
| -8  | -1 | -12 | 15.23  | 9.87  | 2 |
| -9  | -1 | -12 | 0.20   | 6.30  | 2 |
| -16 | 2  | 12  | 0.98   | 9.27  | 3 |
| -15 | 2  | 12  | 11.16  | 9.93  | 3 |
| -14 | 2  | 12  | 156.06 | 20.99 | 3 |
| -13 | 2  | 12  | 393.33 | 29.32 | 3 |
| -12 | 2  | 12  | 109.23 | 17.00 | 3 |
| 12  | -2 | -12 | 98.45  | 13.81 | 1 |
| 11  | -2 | -12 | 5.34   | 6.83  | 1 |
| -11 | 2  | 12  | -6.05  | 4.12  | 3 |
| 10  | -2 | -12 | -3.85  | 4.51  | 1 |
| -10 | 2  | 12  | 1.60   | 5.87  | 3 |
| 9   | -2 | -12 | 40.75  | 10.30 | 1 |
| -9  | 2  | 12  | 29.66  | 9.15  | 3 |
| -8  | 2  | 12  | 193.02 | 19.57 | 3 |
| 8   | -2 | -12 | 163.98 | 16.69 | 1 |
| -7  | 2  | 12  | 55.05  | 12.52 | 3 |
| 7   | -2 | -12 | 51.16  | 10.54 | 1 |
| 6   | -2 | -12 | 238.79 | 18.78 | 1 |
| 5   | -2 | -12 | 9.41   | 5.42  | 1 |
| 4   | -2 | -12 | 30.96  | 7.76  | 1 |
| 3   | -2 | -12 | 211.03 | 16.38 | 1 |
| 2   | -2 | -12 | 152.54 | 13.07 | 2 |
| 2   | -2 | -12 | 128.51 | 13.99 | 1 |
| 1   | -2 | -12 | 96.81  | 12.38 | 1 |
| 0   | -2 | -12 | -0.46  | 3.92  | 2 |
| 0   | -2 | -12 | -4.28  | 3.45  | 1 |
| -1  | -2 | -12 | 60.87  | 9.95  | 1 |
| -1  | -2 | -12 | 40.39  | 9.94  | 2 |
| -2  | -2 | -12 | -1.64  | 3.23  | 1 |
| -2  | -2 | -12 | -5.10  | 5.11  | 2 |
| -3  | -2 | -12 | 3.49   | 4.11  | 1 |
| -3  | -2 | -12 | -3.77  | 4.80  | 2 |
| -4  | -2 | -12 | 111.77 | 16.93 | 2 |
| -5  | -2 | -12 | 27.32  | 10.56 | 2 |
| -6  | -2 | -12 | 11.52  | 8.93  | 2 |

|     |    |     |        |       |   |
|-----|----|-----|--------|-------|---|
| -7  | -2 | -12 | -8.31  | 5.81  | 2 |
| -8  | -2 | -12 | 6.63   | 7.97  | 2 |
| -9  | -2 | -12 | 7.39   | 7.67  | 2 |
| -17 | 3  | 12  | -7.68  | 6.23  | 3 |
| -16 | 3  | 12  | 5.48   | 7.57  | 3 |
| -15 | 3  | 12  | 21.14  | 10.89 | 3 |
| -14 | 3  | 12  | 13.99  | 9.51  | 3 |
| -13 | 3  | 12  | 9.08   | 9.18  | 3 |
| -12 | 3  | 12  | 21.38  | 9.75  | 3 |
| 12  | -3 | -12 | 40.26  | 10.27 | 1 |
| -11 | 3  | 12  | 28.58  | 10.15 | 3 |
| 11  | -3 | -12 | 33.13  | 9.60  | 1 |
| 10  | -3 | -12 | 169.13 | 17.44 | 1 |
| -10 | 3  | 12  | 156.28 | 18.79 | 3 |
| -9  | 3  | 12  | 37.95  | 10.32 | 3 |
| 9   | -3 | -12 | 51.07  | 11.37 | 1 |
| 8   | -3 | -12 | 7.75   | 5.69  | 1 |
| -8  | 3  | 12  | 1.53   | 4.91  | 3 |
| 7   | -3 | -12 | 98.22  | 13.97 | 1 |
| -7  | 3  | 12  | 107.02 | 15.93 | 3 |
| 6   | -3 | -12 | 22.75  | 8.00  | 1 |
| 5   | -3 | -12 | 124.10 | 14.83 | 1 |
| 4   | -3 | -12 | 61.94  | 11.09 | 1 |
| 3   | -3 | -12 | 2.77   | 3.77  | 1 |
| 2   | -3 | -12 | 37.01  | 8.27  | 2 |
| 2   | -3 | -12 | 47.83  | 9.89  | 1 |
| 1   | -3 | -12 | 79.90  | 11.66 | 1 |
| 1   | -3 | -12 | 79.12  | 11.92 | 2 |
| 0   | -3 | -12 | 8.28   | 5.06  | 1 |
| 0   | -3 | -12 | 4.61   | 5.51  | 2 |
| -1  | -3 | -12 | -1.42  | 5.17  | 2 |
| -1  | -3 | -12 | -1.38  | 4.07  | 1 |
| -2  | -3 | -12 | 344.91 | 24.96 | 2 |
| -2  | -3 | -12 | 349.97 | 22.04 | 1 |
| -3  | -3 | -12 | 113.25 | 13.59 | 1 |
| -3  | -3 | -12 | 119.11 | 17.33 | 2 |
| -4  | -3 | -12 | 28.85  | 10.62 | 2 |
| -5  | -3 | -12 | 90.47  | 17.09 | 2 |
| -6  | -3 | -12 | 17.43  | 8.95  | 2 |
| -7  | -3 | -12 | 13.60  | 8.87  | 2 |
| -8  | -3 | -12 | -10.76 | 5.96  | 2 |
| -16 | 4  | 12  | -5.13  | 6.28  | 3 |
| -15 | 4  | 12  | 21.26  | 10.46 | 3 |
| -14 | 4  | 12  | -7.98  | 6.54  | 3 |
| -13 | 4  | 12  | 4.58   | 7.95  | 3 |
| -12 | 4  | 12  | 13.29  | 8.75  | 3 |

|     |    |     |        |       |   |
|-----|----|-----|--------|-------|---|
| 12  | -4 | -12 | 14.02  | 8.12  | 1 |
| 11  | -4 | -12 | 7.66   | 7.24  | 1 |
| -11 | 4  | 12  | 7.38   | 8.29  | 3 |
| 10  | -4 | -12 | 74.92  | 12.92 | 1 |
| -10 | 4  | 12  | 57.20  | 13.14 | 3 |
| 9   | -4 | -12 | 308.41 | 22.16 | 1 |
| -9  | 4  | 12  | 289.89 | 24.35 | 3 |
| -8  | 4  | 12  | 26.07  | 10.59 | 3 |
| 8   | -4 | -12 | 29.51  | 9.56  | 1 |
| 7   | -4 | -12 | 448.34 | 27.09 | 1 |
| 6   | -4 | -12 | 51.69  | 11.47 | 1 |
| 5   | -4 | -12 | -3.76  | 4.85  | 1 |
| 4   | -4 | -12 | 238.68 | 18.36 | 1 |
| 3   | -4 | -12 | 450.55 | 24.15 | 2 |
| 3   | -4 | -12 | 399.30 | 24.58 | 1 |
| 2   | -4 | -12 | 4.59   | 5.05  | 1 |
| 2   | -4 | -12 | 5.00   | 4.14  | 2 |
| 1   | -4 | -12 | 0.36   | 4.59  | 2 |
| 1   | -4 | -12 | 2.20   | 4.28  | 1 |
| 0   | -4 | -12 | 40.82  | 9.15  | 1 |
| 0   | -4 | -12 | 56.55  | 11.57 | 2 |
| -1  | -4 | -12 | 3.77   | 5.08  | 1 |
| -1  | -4 | -12 | 17.33  | 8.50  | 2 |
| -2  | -4 | -12 | 2.80   | 5.80  | 2 |
| -2  | -4 | -12 | 4.60   | 4.93  | 1 |
| -3  | -4 | -12 | 9.50   | 6.09  | 1 |
| -3  | -4 | -12 | 5.32   | 6.87  | 2 |
| -4  | -4 | -12 | 40.69  | 13.11 | 2 |
| -5  | -4 | -12 | 31.39  | 10.84 | 2 |
| -6  | -4 | -12 | 7.65   | 8.58  | 2 |
| -7  | -4 | -12 | 2.55   | 7.83  | 2 |
| -8  | -4 | -12 | -6.22  | 5.98  | 2 |
| -16 | 5  | 12  | -0.62  | 7.09  | 3 |
| -15 | 5  | 12  | 15.54  | 10.73 | 3 |
| -14 | 5  | 12  | 46.29  | 13.03 | 3 |
| -13 | 5  | 12  | 27.88  | 11.14 | 3 |
| -12 | 5  | 12  | 174.49 | 21.67 | 3 |
| 12  | -5 | -12 | 154.77 | 17.19 | 1 |
| 11  | -5 | -12 | 30.45  | 9.39  | 1 |
| -11 | 5  | 12  | 28.34  | 11.60 | 3 |
| 10  | -5 | -12 | 50.87  | 11.49 | 1 |
| -10 | 5  | 12  | 51.88  | 13.01 | 3 |
| -9  | 5  | 12  | 694.37 | 40.30 | 3 |
| 9   | -5 | -12 | 721.04 | 36.88 | 1 |
| -8  | 5  | 12  | 54.93  | 13.81 | 3 |
| 8   | -5 | -12 | 45.85  | 11.18 | 1 |

|     |    |     |        |       |   |
|-----|----|-----|--------|-------|---|
| 7   | -5 | -12 | 75.25  | 13.29 | 1 |
| 6   | -5 | -12 | 12.15  | 7.21  | 1 |
| 5   | -5 | -12 | 15.05  | 7.57  | 1 |
| 4   | -5 | -12 | 28.69  | 8.37  | 1 |
| 3   | -5 | -12 | 0.33   | 4.42  | 1 |
| 2   | -5 | -12 | 154.25 | 15.85 | 2 |
| 2   | -5 | -12 | 127.63 | 15.43 | 1 |
| 1   | -5 | -12 | 98.75  | 14.22 | 2 |
| 1   | -5 | -12 | 122.62 | 15.15 | 1 |
| 0   | -5 | -12 | 78.49  | 12.77 | 1 |
| 0   | -5 | -12 | 76.25  | 13.70 | 2 |
| -1  | -5 | -12 | 91.42  | 15.43 | 2 |
| -1  | -5 | -12 | 111.14 | 14.57 | 1 |
| -2  | -5 | -12 | 53.44  | 12.56 | 2 |
| -2  | -5 | -12 | 38.00  | 9.42  | 1 |
| -3  | -5 | -12 | 309.86 | 22.13 | 1 |
| -3  | -5 | -12 | 341.10 | 27.69 | 2 |
| -4  | -5 | -12 | 72.99  | 15.72 | 2 |
| -5  | -5 | -12 | 25.71  | 10.74 | 2 |
| -6  | -5 | -12 | 49.52  | 13.55 | 2 |
| -7  | -5 | -12 | 2.13   | 7.20  | 2 |
| -16 | 6  | 12  | -7.63  | 6.17  | 3 |
| -15 | 6  | 12  | 59.50  | 14.93 | 3 |
| -14 | 6  | 12  | 1.70   | 8.27  | 3 |
| -13 | 6  | 12  | -3.01  | 7.61  | 3 |
| 12  | -6 | -12 | -5.37  | 5.99  | 1 |
| -12 | 6  | 12  | 1.08   | 8.17  | 3 |
| 11  | -6 | -12 | 292.17 | 22.10 | 1 |
| -11 | 6  | 12  | 272.29 | 26.39 | 3 |
| 10  | -6 | -12 | 5.96   | 6.74  | 1 |
| -10 | 6  | 12  | -3.49  | 7.04  | 3 |
| 9   | -6 | -12 | 143.12 | 16.81 | 1 |
| -9  | 6  | 12  | 111.87 | 17.82 | 3 |
| 8   | -6 | -12 | -2.33  | 5.54  | 1 |
| 7   | -6 | -12 | 10.65  | 6.26  | 1 |
| 6   | -6 | -12 | 373.50 | 25.32 | 1 |
| 5   | -6 | -12 | 765.00 | 38.95 | 1 |
| 4   | -6 | -12 | 5.43   | 6.13  | 1 |
| 3   | -6 | -12 | 9.76   | 6.16  | 1 |
| 2   | -6 | -12 | 61.69  | 12.50 | 1 |
| 1   | -6 | -12 | 157.57 | 17.98 | 2 |
| 1   | -6 | -12 | 176.01 | 18.14 | 1 |
| 0   | -6 | -12 | 17.33  | 8.57  | 2 |
| 0   | -6 | -12 | 31.21  | 8.65  | 1 |
| -1  | -6 | -12 | 88.51  | 14.12 | 1 |
| -1  | -6 | -12 | 85.75  | 15.71 | 2 |

|     |    |     |        |       |   |
|-----|----|-----|--------|-------|---|
| -2  | -6 | -12 | 20.02  | 7.68  | 1 |
| -2  | -6 | -12 | 23.72  | 10.50 | 2 |
| -3  | -6 | -12 | 5.01   | 6.43  | 1 |
| -3  | -6 | -12 | 11.77  | 9.31  | 2 |
| -4  | -6 | -12 | 24.65  | 10.94 | 2 |
| -5  | -6 | -12 | 1.62   | 7.89  | 2 |
| -6  | -6 | -12 | -0.57  | 6.85  | 2 |
| -16 | 7  | 12  | 2.52   | 6.99  | 3 |
| -15 | 7  | 12  | 32.67  | 12.08 | 3 |
| -14 | 7  | 12  | 10.82  | 9.89  | 3 |
| -13 | 7  | 12  | 7.32   | 8.69  | 3 |
| 12  | -7 | -12 | 75.65  | 13.99 | 1 |
| -12 | 7  | 12  | 50.28  | 13.76 | 3 |
| 11  | -7 | -12 | 71.14  | 13.99 | 1 |
| -11 | 7  | 12  | 106.98 | 19.14 | 3 |
| 10  | -7 | -12 | 310.41 | 23.43 | 1 |
| -10 | 7  | 12  | 277.99 | 27.24 | 3 |
| 9   | -7 | -12 | -3.02  | 5.94  | 1 |
| 8   | -7 | -12 | 93.50  | 14.65 | 1 |
| 7   | -7 | -12 | 86.53  | 14.59 | 1 |
| 6   | -7 | -12 | 19.35  | 8.71  | 1 |
| 5   | -7 | -12 | 235.30 | 20.65 | 1 |
| 4   | -7 | -12 | 318.24 | 23.41 | 1 |
| 3   | -7 | -12 | 50.13  | 11.09 | 1 |
| 2   | -7 | -12 | 3.92   | 5.52  | 1 |
| 1   | -7 | -12 | 21.59  | 8.17  | 1 |
| 1   | -7 | -12 | 20.59  | 8.71  | 2 |
| 0   | -7 | -12 | 26.03  | 8.92  | 1 |
| 0   | -7 | -12 | 18.83  | 8.76  | 2 |
| -1  | -7 | -12 | 113.24 | 16.23 | 1 |
| -1  | -7 | -12 | 101.28 | 17.31 | 2 |
| -2  | -7 | -12 | -9.12  | 6.07  | 1 |
| -2  | -7 | -12 | -1.46  | 7.58  | 2 |
| -3  | -7 | -12 | 47.02  | 13.89 | 2 |
| -4  | -7 | -12 | 10.83  | 10.09 | 2 |
| -5  | -7 | -12 | 3.21   | 7.05  | 2 |
| -16 | 8  | 12  | 8.82   | 7.52  | 3 |
| -15 | 8  | 12  | 13.71  | 10.25 | 3 |
| -14 | 8  | 12  | 18.80  | 11.28 | 3 |
| -13 | 8  | 12  | 45.46  | 13.94 | 3 |
| -12 | 8  | 12  | 14.48  | 11.33 | 3 |
| 12  | -8 | -12 | 7.36   | 8.56  | 1 |
| -11 | 8  | 12  | 6.38   | 10.26 | 3 |
| 11  | -8 | -12 | 15.52  | 9.44  | 1 |
| 10  | -8 | -12 | 47.14  | 12.32 | 1 |
| -10 | 8  | 12  | 33.67  | 13.58 | 3 |



|     |    |     |        |       |   |
|-----|----|-----|--------|-------|---|
| 9   | -8 | -12 | 169.51 | 18.95 | 1 |
| 8   | -8 | -12 | 299.35 | 24.48 | 1 |
| 7   | -8 | -12 | 90.04  | 15.37 | 1 |
| 6   | -8 | -12 | 0.74   | 7.14  | 1 |
| 5   | -8 | -12 | 83.30  | 14.86 | 1 |
| 4   | -8 | -12 | 33.72  | 10.58 | 1 |
| 3   | -8 | -12 | 133.79 | 17.94 | 1 |
| 2   | -8 | -12 | 15.16  | 7.53  | 1 |
| 1   | -8 | -12 | 7.95   | 6.26  | 1 |
| 0   | -8 | -12 | 5.65   | 7.14  | 1 |
| 0   | -8 | -12 | 4.56   | 7.66  | 2 |
| -1  | -8 | -12 | 79.45  | 14.09 | 1 |
| -1  | -8 | -12 | 35.57  | 11.45 | 2 |
| -2  | -8 | -12 | 1.50   | 7.01  | 1 |
| -2  | -8 | -12 | 0.89   | 8.05  | 2 |
| -3  | -8 | -12 | 4.38   | 8.91  | 2 |
| -4  | -8 | -12 | 73.76  | 16.82 | 2 |
| -5  | -8 | -12 | 1.12   | 6.31  | 2 |
| -15 | 9  | 12  | 20.67  | 11.40 | 3 |
| -14 | 9  | 12  | 47.98  | 15.37 | 3 |
| -13 | 9  | 12  | 7.44   | 8.77  | 3 |
| 12  | -9 | -12 | 46.93  | 12.80 | 1 |
| -12 | 9  | 12  | 39.89  | 14.17 | 3 |
| 11  | -9 | -12 | 6.07   | 8.02  | 1 |
| -11 | 9  | 12  | 6.73   | 9.62  | 3 |
| 10  | -9 | -12 | 8.72   | 8.40  | 1 |
| 9   | -9 | -12 | -1.40  | 8.24  | 1 |
| 8   | -9 | -12 | 18.68  | 9.03  | 1 |
| 7   | -9 | -12 | 207.98 | 22.26 | 1 |
| 6   | -9 | -12 | 65.37  | 15.34 | 1 |
| 5   | -9 | -12 | 157.02 | 20.12 | 1 |
| 4   | -9 | -12 | 18.01  | 8.17  | 1 |
| 3   | -9 | -12 | 80.08  | 14.55 | 1 |
| 2   | -9 | -12 | 11.00  | 7.60  | 1 |
| 1   | -9 | -12 | 54.35  | 11.91 | 1 |
| 0   | -9 | -12 | -3.57  | 5.72  | 1 |
| 0   | -9 | -12 | -2.48  | 7.07  | 2 |
| -1  | -9 | -12 | 3.07   | 8.23  | 2 |
| -1  | -9 | -12 | 2.87   | 6.67  | 1 |
| -2  | -9 | -12 | 57.85  | 12.85 | 1 |
| -2  | -9 | -12 | 46.16  | 13.09 | 2 |
| -3  | -9 | -12 | 1.56   | 7.77  | 2 |
| -4  | -9 | -12 | 3.05   | 6.99  | 2 |
| -15 | 10 | 12  | 56.51  | 16.78 | 3 |
| -14 | 10 | 12  | -1.95  | 9.62  | 3 |
| -13 | 10 | 12  | 3.06   | 9.74  | 3 |

|     |     |     |        |       |   |
|-----|-----|-----|--------|-------|---|
| -12 | 10  | 12  | 0.63   | 10.21 | 3 |
| 12  | -10 | -12 | -10.38 | 7.08  | 1 |
| 11  | -10 | -12 | 64.36  | 14.35 | 1 |
| 10  | -10 | -12 | 59.60  | 14.26 | 1 |
| 9   | -10 | -12 | 7.26   | 8.26  | 1 |
| 8   | -10 | -12 | 16.02  | 10.39 | 1 |
| 7   | -10 | -12 | 113.67 | 18.56 | 1 |
| 6   | -10 | -12 | 0.70   | 8.75  | 1 |
| 5   | -10 | -12 | 43.21  | 12.27 | 1 |
| 4   | -10 | -12 | 25.76  | 9.93  | 1 |
| 3   | -10 | -12 | 99.05  | 16.01 | 1 |
| 2   | -10 | -12 | 52.43  | 12.15 | 1 |
| 1   | -10 | -12 | 11.99  | 8.08  | 1 |
| 0   | -10 | -12 | 10.60  | 8.31  | 1 |
| -1  | -10 | -12 | 36.33  | 11.37 | 1 |
| -1  | -10 | -12 | 21.59  | 10.81 | 2 |
| -2  | -10 | -12 | 112.48 | 20.78 | 2 |
| -2  | -10 | -12 | 161.31 | 20.49 | 1 |
| -3  | -10 | -12 | 41.47  | 12.66 | 2 |
| -14 | 11  | 12  | -21.02 | 10.11 | 3 |
| -13 | 11  | 12  | -2.40  | 10.21 | 3 |
| 12  | -11 | -12 | 2.58   | 7.40  | 1 |
| 11  | -11 | -12 | 10.21  | 8.94  | 1 |
| 10  | -11 | -12 | 58.26  | 14.34 | 1 |
| 9   | -11 | -12 | 46.77  | 13.98 | 1 |
| 8   | -11 | -12 | -4.21  | 7.51  | 1 |
| 7   | -11 | -12 | 7.07   | 9.36  | 1 |
| 6   | -11 | -12 | 33.48  | 13.19 | 1 |
| 5   | -11 | -12 | 39.21  | 11.23 | 1 |
| 4   | -11 | -12 | 134.69 | 19.20 | 1 |
| 3   | -11 | -12 | 36.91  | 11.50 | 1 |
| 2   | -11 | -12 | 18.02  | 10.48 | 1 |
| 1   | -11 | -12 | 8.26   | 8.39  | 1 |
| 0   | -11 | -12 | 20.31  | 10.30 | 1 |
| -1  | -11 | -12 | 7.95   | 8.69  | 1 |
| -1  | -11 | -12 | -1.73  | 8.65  | 2 |
| 12  | -12 | -12 | 7.92   | 9.07  | 1 |
| 11  | -12 | -12 | 10.06  | 9.36  | 1 |
| 10  | -12 | -12 | 8.39   | 9.54  | 1 |
| 9   | -12 | -12 | 2.98   | 9.08  | 1 |
| 8   | -12 | -12 | 4.49   | 8.94  | 1 |
| 7   | -12 | -12 | 12.03  | 9.73  | 1 |
| 6   | -12 | -12 | 22.00  | 10.75 | 1 |
| 5   | -12 | -12 | 46.22  | 13.33 | 1 |
| 4   | -12 | -12 | 17.62  | 9.72  | 1 |
| 3   | -12 | -12 | 26.68  | 11.49 | 1 |

|    |     |     |        |       |   |
|----|-----|-----|--------|-------|---|
| 2  | -12 | -12 | -7.16  | 7.88  | 1 |
| 1  | -12 | -12 | 81.69  | 18.05 | 1 |
| 0  | -12 | -12 | 5.97   | 9.78  | 1 |
| 12 | -13 | -12 | -0.10  | 8.69  | 1 |
| 11 | -13 | -12 | 1.63   | 8.89  | 1 |
| 10 | -13 | -12 | -4.56  | 7.97  | 1 |
| 9  | -13 | -12 | 15.81  | 9.65  | 1 |
| 8  | -13 | -12 | 5.63   | 9.09  | 1 |
| 7  | -13 | -12 | 5.22   | 8.58  | 1 |
| 6  | -13 | -12 | -3.68  | 7.00  | 1 |
| 5  | -13 | -12 | 13.52  | 10.24 | 1 |
| 4  | -13 | -12 | 13.29  | 10.16 | 1 |
| 3  | -13 | -12 | 6.80   | 10.62 | 1 |
| 2  | -13 | -12 | 0.11   | 10.02 | 1 |
| 9  | -14 | -12 | -2.16  | 6.99  | 1 |
| 8  | -14 | -12 | -12.54 | 6.57  | 1 |
| 7  | -14 | -12 | 2.98   | 7.47  | 1 |
| 6  | -14 | -12 | -4.89  | 7.71  | 1 |
| 2  | 18  | -13 | 46.50  | 12.63 | 1 |
| 1  | 18  | -13 | 5.85   | 7.79  | 1 |
| 0  | 18  | -13 | 63.82  | 14.46 | 1 |
| -1 | 18  | -13 | 13.27  | 7.91  | 1 |
| -2 | 18  | -13 | 2.21   | 6.15  | 1 |
| -3 | 18  | -13 | 14.07  | 8.87  | 1 |
| -4 | 18  | -13 | 23.08  | 11.46 | 2 |
| 5  | 17  | -13 | -6.61  | 6.11  | 1 |
| 4  | 17  | -13 | 2.30   | 8.46  | 1 |
| 3  | 17  | -13 | 11.30  | 8.96  | 1 |
| 2  | 17  | -13 | 7.16   | 7.48  | 1 |
| 1  | 17  | -13 | 6.94   | 6.72  | 1 |
| 0  | 17  | -13 | 20.80  | 8.51  | 1 |
| -1 | 17  | -13 | 2.86   | 6.11  | 1 |
| -2 | 17  | -13 | 100.01 | 15.23 | 1 |
| -3 | 17  | -13 | 24.64  | 9.19  | 1 |
| -3 | 17  | -13 | 37.49  | 12.62 | 2 |
| -4 | 17  | -13 | 21.54  | 10.43 | 2 |
| -5 | 17  | -13 | -2.37  | 8.34  | 2 |
| -6 | 17  | -13 | 78.70  | 16.91 | 2 |
| 6  | 16  | -13 | -4.64  | 5.98  | 1 |
| 5  | 16  | -13 | -3.00  | 5.23  | 1 |
| 4  | 16  | -13 | 73.67  | 14.70 | 1 |
| 3  | 16  | -13 | 14.38  | 8.47  | 1 |
| 2  | 16  | -13 | 193.94 | 22.10 | 1 |
| 1  | 16  | -13 | 33.30  | 10.21 | 1 |
| 0  | 16  | -13 | 12.20  | 7.71  | 1 |
| -1 | 16  | -13 | 139.93 | 17.86 | 1 |

|    |    |     |        |       |   |
|----|----|-----|--------|-------|---|
| -2 | 16 | -13 | 21.39  | 8.19  | 1 |
| -3 | 16 | -13 | 121.62 | 15.73 | 1 |
| -3 | 16 | -13 | 112.99 | 18.23 | 2 |
| -4 | 16 | -13 | 7.20   | 9.12  | 2 |
| -5 | 16 | -13 | 79.51  | 16.71 | 2 |
| -6 | 16 | -13 | -8.90  | 7.48  | 2 |
| -7 | 16 | -13 | 14.44  | 10.29 | 2 |
| 8  | 15 | -13 | -3.29  | 6.18  | 1 |
| 7  | 15 | -13 | 0.27   | 7.43  | 1 |
| 6  | 15 | -13 | -1.85  | 6.73  | 1 |
| 5  | 15 | -13 | 9.71   | 9.71  | 1 |
| 4  | 15 | -13 | 1.81   | 6.34  | 1 |
| 3  | 15 | -13 | 22.86  | 8.64  | 1 |
| 2  | 15 | -13 | 40.91  | 10.41 | 1 |
| 1  | 15 | -13 | 241.87 | 21.12 | 1 |
| 0  | 15 | -13 | -5.01  | 4.79  | 1 |
| -1 | 15 | -13 | 25.24  | 8.75  | 1 |
| -2 | 15 | -13 | 63.27  | 13.68 | 2 |
| -2 | 15 | -13 | 65.69  | 12.65 | 1 |
| -3 | 15 | -13 | 65.97  | 14.28 | 2 |
| -3 | 15 | -13 | 69.76  | 12.32 | 1 |
| -4 | 15 | -13 | 174.21 | 21.36 | 2 |
| -5 | 15 | -13 | 78.73  | 16.60 | 2 |
| -6 | 15 | -13 | 25.77  | 11.77 | 2 |
| -7 | 15 | -13 | -4.87  | 7.40  | 2 |
| -8 | 15 | -13 | 96.87  | 19.21 | 2 |
| 9  | 14 | -13 | -6.62  | 7.44  | 1 |
| 8  | 14 | -13 | 9.66   | 9.12  | 1 |
| 7  | 14 | -13 | 110.67 | 17.67 | 1 |
| 6  | 14 | -13 | 92.41  | 17.47 | 1 |
| 5  | 14 | -13 | 131.42 | 19.35 | 1 |
| 4  | 14 | -13 | 45.18  | 11.37 | 1 |
| 3  | 14 | -13 | 36.61  | 10.37 | 1 |
| 2  | 14 | -13 | 96.71  | 15.66 | 1 |
| 1  | 14 | -13 | 104.06 | 15.74 | 1 |
| 0  | 14 | -13 | -5.87  | 4.66  | 1 |
| -1 | 14 | -13 | 95.04  | 13.95 | 1 |
| -2 | 14 | -13 | 131.94 | 16.44 | 1 |
| -2 | 14 | -13 | 156.10 | 18.27 | 2 |
| -3 | 14 | -13 | 101.70 | 16.18 | 2 |
| -3 | 14 | -13 | 86.20  | 13.56 | 1 |
| -4 | 14 | -13 | 33.83  | 11.58 | 2 |
| -5 | 14 | -13 | 26.99  | 11.09 | 2 |
| -6 | 14 | -13 | 248.61 | 26.42 | 2 |
| -7 | 14 | -13 | 33.04  | 12.36 | 2 |
| -8 | 14 | -13 | 145.36 | 22.63 | 2 |

|    |    |     |        |       |   |
|----|----|-----|--------|-------|---|
| -9 | 14 | -13 | 7.42   | 8.98  | 2 |
| 10 | 13 | -13 | 28.02  | 11.36 | 1 |
| 9  | 13 | -13 | 6.08   | 8.71  | 1 |
| 8  | 13 | -13 | 7.41   | 7.72  | 1 |
| 7  | 13 | -13 | 9.03   | 9.03  | 1 |
| 6  | 13 | -13 | 2.86   | 7.77  | 1 |
| 5  | 13 | -13 | 52.16  | 12.93 | 1 |
| 4  | 13 | -13 | 68.41  | 13.55 | 1 |
| 3  | 13 | -13 | 278.68 | 22.29 | 1 |
| 2  | 13 | -13 | 45.24  | 10.30 | 1 |
| 1  | 13 | -13 | 15.79  | 7.64  | 1 |
| 0  | 13 | -13 | 254.81 | 20.71 | 1 |
| -1 | 13 | -13 | 134.85 | 16.01 | 1 |
| -2 | 13 | -13 | 143.90 | 15.86 | 1 |
| -2 | 13 | -13 | 131.68 | 16.33 | 2 |
| -3 | 13 | -13 | 13.81  | 8.15  | 2 |
| -3 | 13 | -13 | 7.48   | 5.17  | 1 |
| -4 | 13 | -13 | 52.09  | 12.97 | 2 |
| -5 | 13 | -13 | 22.99  | 11.06 | 2 |
| -6 | 13 | -13 | 46.67  | 13.44 | 2 |
| -7 | 13 | -13 | 75.38  | 16.82 | 2 |
| -8 | 13 | -13 | 7.66   | 8.30  | 2 |
| -9 | 13 | -13 | 20.48  | 8.68  | 2 |
| 11 | 12 | -13 | 24.40  | 10.28 | 1 |
| 10 | 12 | -13 | 19.16  | 9.13  | 1 |
| 9  | 12 | -13 | 126.84 | 19.37 | 1 |
| 8  | 12 | -13 | 32.45  | 11.00 | 1 |
| 7  | 12 | -13 | 90.32  | 16.41 | 1 |
| 6  | 12 | -13 | 19.13  | 9.45  | 1 |
| 5  | 12 | -13 | -0.10  | 7.05  | 1 |
| 4  | 12 | -13 | 44.67  | 10.82 | 1 |
| 3  | 12 | -13 | 107.79 | 15.74 | 1 |
| 2  | 12 | -13 | 20.76  | 7.58  | 1 |
| 1  | 12 | -13 | 8.06   | 5.60  | 1 |
| 0  | 12 | -13 | 99.95  | 13.86 | 1 |
| -1 | 12 | -13 | 125.31 | 15.28 | 1 |
| -2 | 12 | -13 | 5.93   | 4.81  | 1 |
| -2 | 12 | -13 | -0.86  | 6.13  | 2 |
| -3 | 12 | -13 | 0.83   | 6.47  | 2 |
| -3 | 12 | -13 | 2.02   | 5.23  | 1 |
| -4 | 12 | -13 | 149.78 | 18.86 | 2 |
| -5 | 12 | -13 | 0.10   | 7.60  | 2 |
| -6 | 12 | -13 | 69.11  | 15.19 | 2 |
| -7 | 12 | -13 | -2.02  | 7.17  | 2 |
| -8 | 12 | -13 | -5.15  | 6.35  | 2 |
| -9 | 12 | -13 | 12.94  | 7.99  | 2 |

|     |    |     |        |       |   |
|-----|----|-----|--------|-------|---|
| 11  | 11 | -13 | -1.57  | 7.47  | 1 |
| 10  | 11 | -13 | 7.25   | 8.36  | 1 |
| 9   | 11 | -13 | -7.28  | 6.79  | 1 |
| 8   | 11 | -13 | -1.48  | 7.00  | 1 |
| 7   | 11 | -13 | -7.56  | 6.22  | 1 |
| 6   | 11 | -13 | 44.95  | 11.68 | 1 |
| 5   | 11 | -13 | 200.05 | 21.33 | 1 |
| 4   | 11 | -13 | 110.15 | 15.69 | 1 |
| 3   | 11 | -13 | 17.22  | 6.67  | 1 |
| 2   | 11 | -13 | -2.31  | 4.11  | 1 |
| 1   | 11 | -13 | 20.69  | 7.49  | 1 |
| 0   | 11 | -13 | 3.77   | 4.47  | 1 |
| -1  | 11 | -13 | 17.60  | 6.99  | 2 |
| -1  | 11 | -13 | 0.79   | 4.54  | 1 |
| -2  | 11 | -13 | 55.87  | 11.62 | 2 |
| -2  | 11 | -13 | 69.55  | 11.48 | 1 |
| -3  | 11 | -13 | -2.92  | 3.57  | 1 |
| -3  | 11 | -13 | -4.50  | 6.60  | 2 |
| -4  | 11 | -13 | 8.69   | 7.75  | 2 |
| -5  | 11 | -13 | -3.31  | 6.23  | 2 |
| -6  | 11 | -13 | 79.27  | 15.14 | 2 |
| -7  | 11 | -13 | 144.74 | 20.79 | 2 |
| -8  | 11 | -13 | 9.51   | 8.67  | 2 |
| -9  | 11 | -13 | -2.94  | 6.59  | 2 |
| -10 | 11 | -13 | -3.83  | 6.06  | 2 |
| 12  | 10 | -13 | 18.98  | 9.85  | 1 |
| 11  | 10 | -13 | 16.80  | 9.40  | 1 |
| 10  | 10 | -13 | 5.96   | 8.30  | 1 |
| 9   | 10 | -13 | 78.07  | 14.98 | 1 |
| 8   | 10 | -13 | 12.80  | 9.27  | 1 |
| 7   | 10 | -13 | 4.79   | 7.64  | 1 |
| 6   | 10 | -13 | -8.09  | 5.65  | 1 |
| 5   | 10 | -13 | 6.78   | 5.84  | 1 |
| 4   | 10 | -13 | 86.59  | 14.15 | 1 |
| 3   | 10 | -13 | 26.75  | 8.17  | 1 |
| 2   | 10 | -13 | -5.01  | 3.37  | 1 |
| 1   | 10 | -13 | 5.02   | 4.77  | 1 |
| 0   | 10 | -13 | 0.93   | 4.91  | 1 |
| -1  | 10 | -13 | 307.85 | 20.81 | 1 |
| -2  | 10 | -13 | 0.59   | 6.56  | 2 |
| -2  | 10 | -13 | -0.98  | 3.54  | 1 |
| -3  | 10 | -13 | 13.61  | 7.51  | 2 |
| -3  | 10 | -13 | 22.05  | 6.27  | 1 |
| -4  | 10 | -13 | -4.52  | 5.36  | 2 |
| -5  | 10 | -13 | 79.68  | 14.77 | 2 |
| -6  | 10 | -13 | 125.56 | 18.55 | 2 |

|     |    |     |        |       |   |
|-----|----|-----|--------|-------|---|
| -7  | 10 | -13 | 29.37  | 11.30 | 2 |
| -8  | 10 | -13 | 12.08  | 8.79  | 2 |
| -9  | 10 | -13 | 36.49  | 11.78 | 2 |
| -10 | 10 | -13 | -3.52  | 5.16  | 2 |
| 12  | 9  | -13 | 20.81  | 10.16 | 1 |
| 11  | 9  | -13 | 5.68   | 8.31  | 1 |
| 10  | 9  | -13 | 11.65  | 8.83  | 1 |
| 9   | 9  | -13 | 314.41 | 25.18 | 1 |
| 8   | 9  | -13 | 43.80  | 11.96 | 1 |
| 7   | 9  | -13 | 8.55   | 7.30  | 1 |
| 6   | 9  | -13 | 55.06  | 11.86 | 1 |
| 5   | 9  | -13 | 24.14  | 8.56  | 1 |
| 4   | 9  | -13 | 68.93  | 12.31 | 1 |
| 3   | 9  | -13 | 239.34 | 19.19 | 1 |
| 2   | 9  | -13 | 4.67   | 4.56  | 1 |
| 1   | 9  | -13 | 1.66   | 3.44  | 1 |
| 0   | 9  | -13 | 10.00  | 4.74  | 1 |
| -1  | 9  | -13 | 30.82  | 7.85  | 1 |
| -1  | 9  | -13 | -2.33  | 3.54  | 2 |
| -2  | 9  | -13 | 54.30  | 10.75 | 2 |
| -2  | 9  | -13 | 34.14  | 8.44  | 1 |
| -3  | 9  | -13 | 36.72  | 8.22  | 1 |
| -3  | 9  | -13 | 62.87  | 12.28 | 2 |
| -4  | 9  | -13 | 226.42 | 20.23 | 2 |
| -5  | 9  | -13 | 354.03 | 26.40 | 2 |
| -6  | 9  | -13 | 47.00  | 12.57 | 2 |
| -7  | 9  | -13 | 5.56   | 7.17  | 2 |
| -8  | 9  | -13 | 34.36  | 11.23 | 2 |
| -9  | 9  | -13 | 2.23   | 7.55  | 2 |
| -10 | 9  | -13 | -7.22  | 5.58  | 2 |
| 12  | 8  | -13 | 12.07  | 9.30  | 1 |
| 11  | 8  | -13 | 1.45   | 7.38  | 1 |
| 10  | 8  | -13 | 51.59  | 13.16 | 1 |
| 9   | 8  | -13 | -1.32  | 6.62  | 1 |
| 8   | 8  | -13 | 74.39  | 14.23 | 1 |
| 7   | 8  | -13 | 28.38  | 9.35  | 1 |
| 6   | 8  | -13 | 15.85  | 7.40  | 1 |
| 5   | 8  | -13 | 85.07  | 13.90 | 1 |
| 4   | 8  | -13 | 138.26 | 16.09 | 1 |
| 3   | 8  | -13 | 203.21 | 17.34 | 1 |
| 2   | 8  | -13 | 35.51  | 8.29  | 1 |
| 1   | 8  | -13 | 114.79 | 13.94 | 1 |
| 0   | 8  | -13 | 130.30 | 14.17 | 1 |
| -1  | 8  | -13 | 0.61   | 2.93  | 2 |
| -1  | 8  | -13 | 7.45   | 4.43  | 1 |
| -2  | 8  | -13 | 104.36 | 12.42 | 1 |

|     |    |     |        |       |   |
|-----|----|-----|--------|-------|---|
| -2  | 8  | -13 | 121.40 | 14.59 | 2 |
| -3  | 8  | -13 | 10.46  | 4.78  | 1 |
| -3  | 8  | -13 | 8.44   | 6.30  | 2 |
| -4  | 8  | -13 | 4.33   | 6.19  | 2 |
| -5  | 8  | -13 | 4.81   | 5.95  | 2 |
| -6  | 8  | -13 | -3.06  | 5.97  | 2 |
| -7  | 8  | -13 | 15.70  | 8.85  | 2 |
| -8  | 8  | -13 | 13.30  | 8.91  | 2 |
| -9  | 8  | -13 | 40.98  | 12.63 | 2 |
| -10 | 8  | -13 | 1.99   | 5.65  | 2 |
| -14 | -7 | 13  | 32.88  | 12.68 | 3 |
| -13 | -7 | 13  | 13.63  | 10.57 | 3 |
| 12  | 7  | -13 | 12.39  | 9.17  | 1 |
| -12 | -7 | 13  | 12.19  | 9.05  | 3 |
| 11  | 7  | -13 | 3.01   | 7.96  | 1 |
| -11 | -7 | 13  | -0.54  | 6.40  | 3 |
| -10 | -7 | 13  | -2.76  | 6.60  | 3 |
| 10  | 7  | -13 | -0.24  | 6.45  | 1 |
| -9  | -7 | 13  | 781.06 | 39.27 | 3 |
| 9   | 7  | -13 | 778.60 | 40.49 | 1 |
| 8   | 7  | -13 | 42.84  | 11.52 | 1 |
| -8  | -7 | 13  | 16.27  | 7.64  | 3 |
| -7  | -7 | 13  | 39.11  | 9.62  | 3 |
| 7   | 7  | -13 | 49.06  | 11.60 | 1 |
| -6  | -7 | 13  | 66.39  | 11.14 | 3 |
| 6   | 7  | -13 | 70.37  | 13.28 | 1 |
| 5   | 7  | -13 | 13.57  | 6.75  | 1 |
| -5  | -7 | 13  | 22.24  | 7.80  | 3 |
| 4   | 7  | -13 | 306.44 | 21.30 | 1 |
| 3   | 7  | -13 | 7.80   | 4.93  | 1 |
| 2   | 7  | -13 | 40.95  | 9.39  | 1 |
| 1   | 7  | -13 | 9.31   | 4.85  | 1 |
| 0   | 7  | -13 | 53.43  | 9.70  | 1 |
| -1  | 7  | -13 | -4.93  | 2.75  | 2 |
| -1  | 7  | -13 | -4.56  | 3.06  | 1 |
| -2  | 7  | -13 | 7.25   | 5.79  | 2 |
| -2  | 7  | -13 | 11.95  | 4.99  | 1 |
| -3  | 7  | -13 | 233.90 | 16.52 | 1 |
| -3  | 7  | -13 | 196.90 | 17.67 | 2 |
| -4  | 7  | -13 | 761.00 | 38.86 | 2 |
| -5  | 7  | -13 | 5.94   | 7.02  | 2 |
| -6  | 7  | -13 | 7.55   | 6.54  | 2 |
| -7  | 7  | -13 | 56.32  | 13.35 | 2 |
| -8  | 7  | -13 | -8.55  | 5.60  | 2 |
| -9  | 7  | -13 | 0.35   | 6.92  | 2 |
| -10 | 7  | -13 | -7.25  | 4.97  | 2 |



|     |    |     |        |       |   |
|-----|----|-----|--------|-------|---|
| -14 | -6 | 13  | 14.20  | 10.17 | 3 |
| -13 | -6 | 13  | 63.81  | 14.72 | 3 |
| 12  | 6  | -13 | 17.14  | 9.03  | 1 |
| -12 | -6 | 13  | 14.24  | 8.83  | 3 |
| 11  | 6  | -13 | 124.22 | 17.19 | 1 |
| -11 | -6 | 13  | 83.06  | 14.80 | 3 |
| 10  | 6  | -13 | 70.05  | 13.16 | 1 |
| -10 | -6 | 13  | 74.46  | 13.86 | 3 |
| -9  | -6 | 13  | 66.53  | 12.61 | 3 |
| 9   | 6  | -13 | 46.73  | 11.65 | 1 |
| -8  | -6 | 13  | 14.19  | 7.67  | 3 |
| 8   | 6  | -13 | 23.58  | 8.14  | 1 |
| -7  | -6 | 13  | 6.36   | 6.53  | 3 |
| 7   | 6  | -13 | 18.20  | 8.21  | 1 |
| 6   | 6  | -13 | 327.34 | 22.94 | 1 |
| -6  | -6 | 13  | 298.08 | 21.15 | 3 |
| -5  | -6 | 13  | 863.60 | 40.07 | 3 |
| 5   | 6  | -13 | 885.42 | 41.22 | 1 |
| 4   | 6  | -13 | 360.80 | 23.40 | 1 |
| 3   | 6  | -13 | 24.79  | 7.62  | 1 |
| 2   | 6  | -13 | 385.94 | 23.40 | 1 |
| 1   | 6  | -13 | 157.39 | 13.90 | 1 |
| 0   | 6  | -13 | 116.32 | 13.10 | 1 |
| 0   | 6  | -13 | 154.79 | 13.15 | 2 |
| -1  | 6  | -13 | 6.23   | 4.49  | 1 |
| -1  | 6  | -13 | -3.38  | 3.14  | 2 |
| -2  | 6  | -13 | 164.13 | 13.92 | 1 |
| -2  | 6  | -13 | 161.40 | 16.14 | 2 |
| -3  | 6  | -13 | 4.25   | 5.12  | 2 |
| -3  | 6  | -13 | 1.06   | 3.47  | 1 |
| -4  | 6  | -13 | 12.21  | 6.61  | 2 |
| -5  | 6  | -13 | 99.05  | 15.42 | 2 |
| -6  | 6  | -13 | 3.85   | 6.85  | 2 |
| -7  | 6  | -13 | 26.80  | 9.82  | 2 |
| -8  | 6  | -13 | 25.80  | 9.98  | 2 |
| -9  | 6  | -13 | 20.78  | 9.63  | 2 |
| -10 | 6  | -13 | -8.46  | 5.04  | 2 |
| -15 | -5 | 13  | 9.29   | 9.93  | 3 |
| -14 | -5 | 13  | 133.39 | 20.10 | 3 |
| -13 | -5 | 13  | 0.50   | 6.73  | 3 |
| 12  | 5  | -13 | 31.79  | 10.36 | 1 |
| -12 | -5 | 13  | 7.85   | 8.53  | 3 |
| -11 | -5 | 13  | 619.47 | 36.51 | 3 |
| 11  | 5  | -13 | 652.64 | 35.39 | 1 |
| -10 | -5 | 13  | 8.42   | 6.93  | 3 |
| 10  | 5  | -13 | -0.64  | 6.10  | 1 |

|     |    |     |        |       |   |
|-----|----|-----|--------|-------|---|
| -9  | -5 | 13  | 374.43 | 25.61 | 3 |
| 9   | 5  | -13 | 381.84 | 25.95 | 1 |
| -8  | -5 | 13  | 5.83   | 5.64  | 3 |
| 8   | 5  | -13 | 6.72   | 6.09  | 1 |
| -7  | -5 | 13  | 115.38 | 14.48 | 3 |
| 7   | 5  | -13 | 139.12 | 16.54 | 1 |
| 6   | 5  | -13 | 72.13  | 12.77 | 1 |
| -6  | -5 | 13  | 86.12  | 12.88 | 3 |
| 5   | 5  | -13 | 14.88  | 7.20  | 1 |
| -5  | -5 | 13  | 13.02  | 6.51  | 3 |
| 4   | 5  | -13 | 355.35 | 22.80 | 1 |
| 3   | 5  | -13 | 58.86  | 9.98  | 1 |
| 2   | 5  | -13 | 79.69  | 11.60 | 1 |
| 1   | 5  | -13 | 10.32  | 4.72  | 1 |
| 0   | 5  | -13 | 82.81  | 10.93 | 1 |
| 0   | 5  | -13 | 76.77  | 10.64 | 2 |
| -1  | 5  | -13 | 3.34   | 4.05  | 2 |
| -1  | 5  | -13 | 3.13   | 3.46  | 1 |
| -2  | 5  | -13 | 113.93 | 12.45 | 1 |
| -2  | 5  | -13 | 100.00 | 13.24 | 2 |
| -3  | 5  | -13 | 16.66  | 7.30  | 2 |
| -3  | 5  | -13 | 18.94  | 5.60  | 1 |
| -4  | 5  | -13 | 60.66  | 12.35 | 2 |
| -5  | 5  | -13 | 4.17   | 6.68  | 2 |
| -6  | 5  | -13 | 0.84   | 6.32  | 2 |
| -7  | 5  | -13 | 20.56  | 9.47  | 2 |
| -8  | 5  | -13 | -1.65  | 5.76  | 2 |
| -9  | 5  | -13 | 14.56  | 9.03  | 2 |
| -10 | 5  | -13 | -2.26  | 5.39  | 2 |
| -15 | -4 | 13  | 53.27  | 15.02 | 3 |
| -14 | -4 | 13  | 1.58   | 8.19  | 3 |
| -13 | -4 | 13  | 101.87 | 17.08 | 3 |
| 12  | 4  | -13 | 2.24   | 6.62  | 1 |
| -12 | -4 | 13  | 4.12   | 6.33  | 3 |
| -11 | -4 | 13  | 31.87  | 10.46 | 3 |
| 11  | 4  | -13 | 32.78  | 9.96  | 1 |
| -10 | -4 | 13  | 504.72 | 30.92 | 3 |
| 10  | 4  | -13 | 479.73 | 29.69 | 1 |
| 9   | 4  | -13 | 117.15 | 15.86 | 1 |
| -9  | -4 | 13  | 118.85 | 15.74 | 3 |
| -8  | -4 | 13  | 84.18  | 13.31 | 3 |
| 8   | 4  | -13 | 82.88  | 13.44 | 1 |
| 7   | 4  | -13 | 117.86 | 15.33 | 1 |
| -7  | -4 | 13  | 119.34 | 15.25 | 3 |
| -6  | -4 | 13  | 43.32  | 9.78  | 3 |
| 6   | 4  | -13 | 30.22  | 9.07  | 1 |

|     |    |     |        |       |   |
|-----|----|-----|--------|-------|---|
| 5   | 4  | -13 | 499.78 | 28.19 | 1 |
| 4   | 4  | -13 | 75.51  | 11.53 | 1 |
| 3   | 4  | -13 | 52.12  | 9.80  | 1 |
| 2   | 4  | -13 | 4.80   | 3.84  | 1 |
| 1   | 4  | -13 | 12.41  | 5.11  | 1 |
| 0   | 4  | -13 | 48.04  | 9.23  | 2 |
| 0   | 4  | -13 | 47.95  | 8.93  | 1 |
| -1  | 4  | -13 | 25.54  | 7.10  | 1 |
| -2  | 4  | -13 | 16.81  | 5.84  | 1 |
| -2  | 4  | -13 | 8.83   | 5.60  | 2 |
| -3  | 4  | -13 | 180.20 | 14.09 | 1 |
| -3  | 4  | -13 | 152.48 | 16.40 | 2 |
| -4  | 4  | -13 | 139.75 | 16.58 | 2 |
| -5  | 4  | -13 | 345.85 | 24.90 | 2 |
| -6  | 4  | -13 | 14.25  | 7.86  | 2 |
| -7  | 4  | -13 | 3.46   | 6.90  | 2 |
| -8  | 4  | -13 | 120.14 | 18.75 | 2 |
| -9  | 4  | -13 | 9.92   | 8.15  | 2 |
| -10 | 4  | -13 | 3.56   | 5.43  | 2 |
| -16 | -3 | 13  | -0.38  | 9.00  | 3 |
| -15 | -3 | 13  | 16.99  | 10.15 | 3 |
| -14 | -3 | 13  | 103.86 | 17.97 | 3 |
| -13 | -3 | 13  | 89.75  | 16.59 | 3 |
| -12 | -3 | 13  | 57.86  | 13.41 | 3 |
| 12  | 3  | -13 | 54.41  | 12.35 | 1 |
| -11 | -3 | 13  | 5.42   | 6.31  | 3 |
| 11  | 3  | -13 | 10.69  | 6.88  | 1 |
| -10 | -3 | 13  | 193.80 | 19.79 | 3 |
| 10  | 3  | -13 | 144.02 | 17.03 | 1 |
| -9  | -3 | 13  | -5.86  | 4.23  | 3 |
| 9   | 3  | -13 | 2.07   | 5.44  | 1 |
| 8   | 3  | -13 | 19.95  | 7.88  | 1 |
| -8  | -3 | 13  | 19.86  | 8.42  | 3 |
| 7   | 3  | -13 | 19.10  | 7.56  | 1 |
| -7  | -3 | 13  | 19.80  | 7.41  | 3 |
| -6  | -3 | 13  | 83.55  | 13.65 | 3 |
| 6   | 3  | -13 | 82.92  | 12.85 | 1 |
| 5   | 3  | -13 | 97.18  | 13.23 | 1 |
| 4   | 3  | -13 | 73.06  | 11.14 | 1 |
| 3   | 3  | -13 | 4.78   | 4.09  | 1 |
| 2   | 3  | -13 | 54.25  | 9.59  | 1 |
| 1   | 3  | -13 | 87.52  | 11.47 | 1 |
| 0   | 3  | -13 | 106.01 | 12.44 | 1 |
| 0   | 3  | -13 | 113.95 | 12.31 | 2 |
| -1  | 3  | -13 | 57.17  | 9.77  | 2 |
| -1  | 3  | -13 | 102.48 | 11.93 | 1 |

|     |    |     |        |       |   |
|-----|----|-----|--------|-------|---|
| -2  | 3  | -13 | 246.13 | 18.70 | 2 |
| -2  | 3  | -13 | 261.27 | 17.71 | 1 |
| -3  | 3  | -13 | -2.00  | 5.26  | 2 |
| -3  | 3  | -13 | 10.42  | 5.11  | 1 |
| -4  | 3  | -13 | 311.47 | 22.85 | 2 |
| -5  | 3  | -13 | 11.74  | 6.91  | 2 |
| -6  | 3  | -13 | 120.44 | 17.70 | 2 |
| -7  | 3  | -13 | 48.38  | 13.11 | 2 |
| -8  | 3  | -13 | 47.82  | 12.91 | 2 |
| -9  | 3  | -13 | 9.02   | 7.70  | 2 |
| -10 | 3  | -13 | -2.81  | 5.68  | 2 |
| -16 | -2 | 13  | 5.13   | 10.46 | 3 |
| -15 | -2 | 13  | 26.35  | 12.51 | 3 |
| -14 | -2 | 13  | -7.04  | 7.63  | 3 |
| -13 | -2 | 13  | 5.07   | 7.63  | 3 |
| -12 | -2 | 13  | 148.16 | 19.53 | 3 |
| 12  | 2  | -13 | 111.41 | 15.80 | 1 |
| 11  | 2  | -13 | 61.28  | 12.28 | 1 |
| -11 | -2 | 13  | 55.88  | 12.91 | 3 |
| -10 | -2 | 13  | 225.03 | 20.22 | 3 |
| 10  | 2  | -13 | 242.65 | 20.50 | 1 |
| -9  | -2 | 13  | 0.40   | 5.81  | 3 |
| 9   | 2  | -13 | -7.24  | 3.95  | 1 |
| 8   | 2  | -13 | 8.35   | 6.59  | 1 |
| -8  | -2 | 13  | 13.08  | 6.90  | 3 |
| 7   | 2  | -13 | 330.29 | 22.20 | 1 |
| -7  | -2 | 13  | 304.77 | 22.64 | 3 |
| 6   | 2  | -13 | 23.35  | 8.37  | 1 |
| -6  | -2 | 13  | 44.92  | 10.55 | 3 |
| 5   | 2  | -13 | 525.52 | 28.97 | 1 |
| 4   | 2  | -13 | 27.17  | 7.43  | 1 |
| 3   | 2  | -13 | 48.07  | 9.19  | 1 |
| 2   | 2  | -13 | 0.68   | 3.84  | 1 |
| 1   | 2  | -13 | 11.19  | 4.90  | 1 |
| 0   | 2  | -13 | 263.89 | 17.74 | 2 |
| 0   | 2  | -13 | 238.30 | 17.02 | 1 |
| -1  | 2  | -13 | -3.57  | 4.25  | 2 |
| -1  | 2  | -13 | 0.62   | 3.77  | 1 |
| -2  | 2  | -13 | 493.36 | 25.67 | 1 |
| -2  | 2  | -13 | 478.24 | 27.29 | 2 |
| -3  | 2  | -13 | 179.99 | 14.78 | 1 |
| -3  | 2  | -13 | 211.59 | 18.13 | 2 |
| -4  | 2  | -13 | 74.03  | 13.48 | 2 |
| -5  | 2  | -13 | 84.10  | 14.86 | 2 |
| -6  | 2  | -13 | 283.93 | 24.22 | 2 |
| -7  | 2  | -13 | 12.14  | 8.70  | 2 |

|     |    |     |         |       |   |
|-----|----|-----|---------|-------|---|
| -8  | 2  | -13 | 20.48   | 10.70 | 2 |
| -9  | 2  | -13 | 7.06    | 7.16  | 2 |
| -16 | -1 | 13  | 80.87   | 19.09 | 3 |
| -15 | -1 | 13  | 60.18   | 15.63 | 3 |
| -14 | -1 | 13  | 6.12    | 7.58  | 3 |
| -13 | -1 | 13  | 58.26   | 14.25 | 3 |
| -12 | -1 | 13  | 66.96   | 13.90 | 3 |
| 12  | 1  | -13 | 35.15   | 10.43 | 1 |
| -11 | -1 | 13  | 95.41   | 15.98 | 3 |
| 11  | 1  | -13 | 95.65   | 14.39 | 1 |
| 10  | 1  | -13 | 28.60   | 9.03  | 1 |
| -10 | -1 | 13  | 16.57   | 7.62  | 3 |
| -9  | -1 | 13  | 212.19  | 20.66 | 3 |
| 9   | 1  | -13 | 201.81  | 18.80 | 1 |
| -8  | -1 | 13  | -1.31   | 5.05  | 3 |
| 8   | 1  | -13 | 12.05   | 6.99  | 1 |
| 7   | 1  | -13 | 112.00  | 14.71 | 1 |
| -7  | -1 | 13  | 87.16   | 14.54 | 3 |
| 6   | 1  | -13 | 82.34   | 12.96 | 1 |
| -6  | -1 | 13  | 91.69   | 14.18 | 3 |
| 5   | 1  | -13 | -1.69   | 4.81  | 1 |
| 4   | 1  | -13 | 319.86  | 20.82 | 1 |
| 3   | 1  | -13 | 1135.55 | 46.77 | 1 |
| 2   | 1  | -13 | 141.34  | 14.55 | 1 |
| 1   | 1  | -13 | 38.34   | 8.20  | 1 |
| 0   | 1  | -13 | 100.36  | 12.09 | 2 |
| 0   | 1  | -13 | 134.93  | 13.84 | 1 |
| -1  | 1  | -13 | 52.99   | 9.98  | 2 |
| -1  | 1  | -13 | 38.83   | 8.43  | 1 |
| -2  | 1  | -13 | 85.23   | 11.42 | 1 |
| -2  | 1  | -13 | 94.60   | 13.26 | 2 |
| -3  | 1  | -13 | 75.96   | 13.07 | 2 |
| -3  | 1  | -13 | 61.06   | 10.13 | 1 |
| -4  | 1  | -13 | 342.28  | 24.33 | 2 |
| -5  | 1  | -13 | 5.22    | 6.44  | 2 |
| -6  | 1  | -13 | 13.39   | 8.79  | 2 |
| -7  | 1  | -13 | 39.16   | 12.42 | 2 |
| -8  | 1  | -13 | -5.60   | 6.44  | 2 |
| -9  | 1  | -13 | -3.47   | 6.09  | 2 |
| -16 | 0  | 13  | 1.39    | 10.03 | 3 |
| -15 | 0  | 13  | 0.04    | 8.20  | 3 |
| -14 | 0  | 13  | -11.12  | 5.92  | 3 |
| -13 | 0  | 13  | 34.18   | 11.26 | 3 |
| 12  | 0  | -13 | 79.50   | 13.48 | 1 |
| -12 | 0  | 13  | 57.27   | 13.55 | 3 |
| 11  | 0  | -13 | -10.52  | 5.08  | 1 |

-11 0 13 -0.59 5.28 3  
-10 0 13 121.84 17.17 3  
10 0 -13 123.59 15.68 1  
9 0 -13 145.13 16.76 1  
-9 0 13 177.37 19.21 3  
-8 0 13 17.25 7.33 3  
8 0 -13 16.65 7.42 1  
-7 0 13 164.71 19.11 3  
7 0 -13 196.45 17.40 1  
6 0 -13 146.18 16.26 1  
5 0 -13 200.62 17.21 1  
4 0 -13 -1.09 3.32 1  
3 0 -13 21.35 6.85 1  
2 0 -13 320.65 20.68 1  
1 0 -13 2.91 3.66 1  
1 0 -13 4.74 4.52 2  
-1 0 -13 0.91 3.62 1  
-1 0 -13 1.84 4.01 2  
-2 0 -13 108.54 14.54 2  
-2 0 -13 114.54 12.96 1  
-3 0 -13 189.86 15.43 1  
-3 0 -13 174.52 18.73 2  
-4 0 -13 9.22 6.62 2  
-5 0 -13 48.86 12.81 2  
-6 0 -13 -2.85 6.69 2  
-7 0 -13 49.96 12.93 2  
-8 0 -13 7.15 7.89 2  
-9 0 -13 -1.47 5.66 2  
-16 1 13 -0.62 9.53 3  
-15 1 13 1.21 9.23 3  
-14 1 13 32.16 11.50 3  
-13 1 13 11.29 8.25 3  
-12 1 13 216.52 22.79 3  
12 -1 -13 229.78 19.50 1  
-11 1 13 272.11 23.18 3  
11 -1 -13 248.22 20.43 1  
10 -1 -13 1.67 5.64 1  
-10 1 13 -1.09 5.78 3  
-9 1 13 2.29 6.80 3  
9 -1 -13 -2.45 5.39 1  
-8 1 13 36.23 9.90 3  
8 -1 -13 23.46 8.74 1  
7 -1 -13 128.39 15.67 1  
-7 1 13 121.43 16.89 3  
6 -1 -13 231.00 18.85 1  
5 -1 -13 21.56 7.60 1

|     |    |     |        |       |   |
|-----|----|-----|--------|-------|---|
| 4   | -1 | -13 | -3.55  | 3.46  | 1 |
| 3   | -1 | -13 | 12.19  | 5.73  | 1 |
| 2   | -1 | -13 | 2.95   | 3.76  | 1 |
| 1   | -1 | -13 | 7.89   | 5.51  | 2 |
| 1   | -1 | -13 | 9.63   | 5.00  | 1 |
| 0   | -1 | -13 | 109.07 | 13.07 | 1 |
| 0   | -1 | -13 | 91.53  | 12.60 | 2 |
| -1  | -1 | -13 | 224.05 | 18.42 | 2 |
| -1  | -1 | -13 | 259.59 | 18.37 | 1 |
| -2  | -1 | -13 | 92.92  | 14.50 | 2 |
| -2  | -1 | -13 | 78.84  | 11.67 | 1 |
| -3  | -1 | -13 | 1.87   | 5.59  | 2 |
| -4  | -1 | -13 | -3.57  | 5.82  | 2 |
| -5  | -1 | -13 | 20.34  | 9.62  | 2 |
| -6  | -1 | -13 | 57.33  | 14.57 | 2 |
| -7  | -1 | -13 | 47.06  | 13.90 | 2 |
| -8  | -1 | -13 | 0.55   | 7.20  | 2 |
| -16 | 2  | 13  | 1.10   | 10.48 | 3 |
| -15 | 2  | 13  | 3.06   | 8.68  | 3 |
| -14 | 2  | 13  | 14.74  | 10.02 | 3 |
| -13 | 2  | 13  | 131.85 | 19.38 | 3 |
| -12 | 2  | 13  | 159.79 | 20.16 | 3 |
| 12  | -2 | -13 | 165.70 | 17.87 | 1 |
| -11 | 2  | 13  | 6.10   | 6.55  | 3 |
| 11  | -2 | -13 | 19.86  | 8.22  | 1 |
| -10 | 2  | 13  | 12.03  | 6.95  | 3 |
| 10  | -2 | -13 | 10.57  | 6.78  | 1 |
| 9   | -2 | -13 | -2.15  | 5.71  | 1 |
| -9  | 2  | 13  | -0.13  | 5.04  | 3 |
| 8   | -2 | -13 | 2.56   | 5.31  | 1 |
| -8  | 2  | 13  | 4.39   | 6.59  | 3 |
| -7  | 2  | 13  | -3.27  | 3.99  | 3 |
| 7   | -2 | -13 | 4.13   | 5.70  | 1 |
| 6   | -2 | -13 | 249.22 | 19.79 | 1 |
| 5   | -2 | -13 | 52.10  | 10.33 | 1 |
| 4   | -2 | -13 | 191.34 | 16.49 | 1 |
| 3   | -2 | -13 | 16.90  | 6.16  | 1 |
| 2   | -2 | -13 | 0.21   | 4.44  | 1 |
| 1   | -2 | -13 | 15.53  | 5.88  | 1 |
| 1   | -2 | -13 | 5.88   | 4.72  | 2 |
| 0   | -2 | -13 | 116.44 | 14.39 | 2 |
| 0   | -2 | -13 | 127.62 | 14.46 | 1 |
| -1  | -2 | -13 | 212.64 | 18.28 | 2 |
| -1  | -2 | -13 | 209.77 | 16.82 | 1 |
| -2  | -2 | -13 | 5.77   | 6.27  | 2 |
| -2  | -2 | -13 | 1.77   | 4.74  | 1 |

|     |    |     |        |       |   |
|-----|----|-----|--------|-------|---|
| -3  | -2 | -13 | 58.90  | 13.10 | 2 |
| -4  | -2 | -13 | 42.89  | 12.82 | 2 |
| -5  | -2 | -13 | 1.57   | 6.94  | 2 |
| -6  | -2 | -13 | 30.28  | 11.18 | 2 |
| -7  | -2 | -13 | -0.02  | 7.75  | 2 |
| -8  | -2 | -13 | 6.13   | 6.85  | 2 |
| -16 | 3  | 13  | 8.72   | 10.27 | 3 |
| -15 | 3  | 13  | 15.27  | 10.63 | 3 |
| -14 | 3  | 13  | 56.55  | 14.04 | 3 |
| -13 | 3  | 13  | 41.52  | 11.61 | 3 |
| 12  | -3 | -13 | 150.01 | 17.35 | 1 |
| -12 | 3  | 13  | 104.43 | 17.29 | 3 |
| -11 | 3  | 13  | -3.83  | 5.69  | 3 |
| 11  | -3 | -13 | 2.39   | 5.75  | 1 |
| 10  | -3 | -13 | 8.46   | 7.50  | 1 |
| -10 | 3  | 13  | 18.43  | 7.88  | 3 |
| 9   | -3 | -13 | 11.08  | 7.20  | 1 |
| -9  | 3  | 13  | 0.17   | 5.89  | 3 |
| -8  | 3  | 13  | 112.72 | 17.51 | 3 |
| 8   | -3 | -13 | 87.22  | 14.00 | 1 |
| 7   | -3 | -13 | 48.65  | 11.54 | 1 |
| 6   | -3 | -13 | 13.19  | 7.77  | 1 |
| 5   | -3 | -13 | 61.52  | 11.91 | 1 |
| 4   | -3 | -13 | 36.85  | 9.35  | 1 |
| 3   | -3 | -13 | 111.91 | 14.47 | 1 |
| 2   | -3 | -13 | 16.42  | 6.71  | 1 |
| 1   | -3 | -13 | 0.23   | 4.42  | 2 |
| 1   | -3 | -13 | 4.21   | 5.12  | 1 |
| 0   | -3 | -13 | 13.98  | 6.80  | 1 |
| 0   | -3 | -13 | 16.44  | 7.72  | 2 |
| -1  | -3 | -13 | 11.84  | 7.01  | 2 |
| -1  | -3 | -13 | 21.76  | 7.46  | 1 |
| -2  | -3 | -13 | 12.72  | 6.96  | 2 |
| -2  | -3 | -13 | 16.20  | 6.66  | 1 |
| -3  | -3 | -13 | 32.97  | 11.13 | 2 |
| -4  | -3 | -13 | 86.53  | 16.76 | 2 |
| -5  | -3 | -13 | 7.67   | 8.67  | 2 |
| -6  | -3 | -13 | -6.59  | 7.40  | 2 |
| -7  | -3 | -13 | 2.29   | 7.17  | 2 |
| -16 | 4  | 13  | -2.08  | 6.97  | 3 |
| -15 | 4  | 13  | -3.66  | 7.49  | 3 |
| -14 | 4  | 13  | 5.56   | 7.96  | 3 |
| 13  | -4 | -13 | 9.78   | 7.57  | 1 |
| -13 | 4  | 13  | 8.01   | 8.00  | 3 |
| 12  | -4 | -13 | 5.74   | 6.65  | 1 |
| -12 | 4  | 13  | -7.60  | 6.62  | 3 |



|     |    |     |        |       |   |
|-----|----|-----|--------|-------|---|
| 11  | -4 | -13 | 14.06  | 7.70  | 1 |
| -11 | 4  | 13  | 13.81  | 10.07 | 3 |
| 10  | -4 | -13 | 49.37  | 11.40 | 1 |
| -10 | 4  | 13  | 22.35  | 10.64 | 3 |
| -9  | 4  | 13  | 106.17 | 17.82 | 3 |
| 9   | -4 | -13 | 112.74 | 15.69 | 1 |
| 8   | -4 | -13 | 182.97 | 18.90 | 1 |
| 7   | -4 | -13 | 41.79  | 10.51 | 1 |
| 6   | -4 | -13 | -2.97  | 5.37  | 1 |
| 5   | -4 | -13 | 47.31  | 10.98 | 1 |
| 4   | -4 | -13 | 151.96 | 17.02 | 1 |
| 3   | -4 | -13 | 3.70   | 4.86  | 1 |
| 2   | -4 | -13 | 28.18  | 8.23  | 1 |
| 1   | -4 | -13 | 8.01   | 6.63  | 2 |
| 1   | -4 | -13 | 12.79  | 5.83  | 1 |
| 0   | -4 | -13 | 30.50  | 9.78  | 2 |
| 0   | -4 | -13 | 20.21  | 7.15  | 1 |
| -1  | -4 | -13 | 5.46   | 7.34  | 2 |
| -1  | -4 | -13 | 12.34  | 5.70  | 1 |
| -2  | -4 | -13 | 13.57  | 6.29  | 1 |
| -2  | -4 | -13 | 10.63  | 7.80  | 2 |
| -3  | -4 | -13 | 55.54  | 14.23 | 2 |
| -4  | -4 | -13 | 40.34  | 12.98 | 2 |
| -5  | -4 | -13 | 74.38  | 15.58 | 2 |
| -6  | -4 | -13 | 25.28  | 11.41 | 2 |
| -7  | -4 | -13 | -5.82  | 6.36  | 2 |
| -16 | 5  | 13  | -8.40  | 5.54  | 3 |
| -15 | 5  | 13  | 5.60   | 7.55  | 3 |
| -14 | 5  | 13  | 24.24  | 11.83 | 3 |
| -13 | 5  | 13  | 14.67  | 9.61  | 3 |
| 13  | -5 | -13 | 25.58  | 10.02 | 1 |
| -12 | 5  | 13  | 15.76  | 9.94  | 3 |
| 12  | -5 | -13 | -0.67  | 7.49  | 1 |
| 11  | -5 | -13 | -2.08  | 5.98  | 1 |
| -11 | 5  | 13  | 2.87   | 9.05  | 3 |
| 10  | -5 | -13 | 8.20   | 7.14  | 1 |
| -10 | 5  | 13  | 7.43   | 8.96  | 3 |
| 9   | -5 | -13 | 118.30 | 16.63 | 1 |
| -9  | 5  | 13  | 107.63 | 18.77 | 3 |
| 8   | -5 | -13 | -11.29 | 5.37  | 1 |
| 7   | -5 | -13 | 1.38   | 5.45  | 1 |
| 6   | -5 | -13 | 181.89 | 19.16 | 1 |
| 5   | -5 | -13 | 6.47   | 5.05  | 1 |
| 4   | -5 | -13 | 18.98  | 6.54  | 1 |
| 3   | -5 | -13 | 88.33  | 13.88 | 1 |
| 2   | -5 | -13 | 96.70  | 14.17 | 1 |

|     |    |     |        |       |   |
|-----|----|-----|--------|-------|---|
| 2   | -5 | -13 | 54.13  | 11.24 | 2 |
| 1   | -5 | -13 | 43.46  | 10.18 | 1 |
| 1   | -5 | -13 | 43.86  | 10.53 | 2 |
| 0   | -5 | -13 | 13.56  | 6.58  | 1 |
| 0   | -5 | -13 | 21.02  | 9.18  | 2 |
| -1  | -5 | -13 | 14.14  | 6.63  | 1 |
| -1  | -5 | -13 | 6.48   | 7.92  | 2 |
| -2  | -5 | -13 | 80.38  | 16.04 | 2 |
| -2  | -5 | -13 | 74.38  | 12.79 | 1 |
| -3  | -5 | -13 | 57.68  | 14.60 | 2 |
| -4  | -5 | -13 | 26.69  | 12.12 | 2 |
| -5  | -5 | -13 | 10.40  | 8.76  | 2 |
| -6  | -5 | -13 | -9.89  | 6.30  | 2 |
| -16 | 6  | 13  | 5.32   | 6.93  | 3 |
| -15 | 6  | 13  | 3.74   | 8.55  | 3 |
| -14 | 6  | 13  | 20.56  | 10.96 | 3 |
| -13 | 6  | 13  | 34.55  | 12.08 | 3 |
| 13  | -6 | -13 | 40.34  | 11.51 | 1 |
| 12  | -6 | -13 | 3.65   | 7.58  | 1 |
| -12 | 6  | 13  | 10.78  | 8.93  | 3 |
| -11 | 6  | 13  | 245.14 | 26.65 | 3 |
| 11  | -6 | -13 | 247.51 | 21.84 | 1 |
| -10 | 6  | 13  | 1.88   | 8.89  | 3 |
| 10  | -6 | -13 | 14.69  | 8.50  | 1 |
| 9   | -6 | -13 | 4.84   | 7.53  | 1 |
| 8   | -6 | -13 | 108.78 | 16.75 | 1 |
| 7   | -6 | -13 | 22.21  | 9.43  | 1 |
| 6   | -6 | -13 | 153.93 | 18.01 | 1 |
| 5   | -6 | -13 | 99.00  | 15.03 | 1 |
| 4   | -6 | -13 | 0.93   | 5.55  | 1 |
| 3   | -6 | -13 | -11.79 | 4.21  | 1 |
| 2   | -6 | -13 | 5.31   | 6.74  | 2 |
| 2   | -6 | -13 | -0.09  | 5.44  | 1 |
| 1   | -6 | -13 | 21.24  | 8.60  | 1 |
| 1   | -6 | -13 | 16.40  | 8.31  | 2 |
| 0   | -6 | -13 | -5.99  | 4.85  | 1 |
| 0   | -6 | -13 | 2.98   | 6.52  | 2 |
| -1  | -6 | -13 | 62.36  | 14.85 | 2 |
| -1  | -6 | -13 | 78.46  | 13.41 | 1 |
| -2  | -6 | -13 | 128.51 | 20.43 | 2 |
| -2  | -6 | -13 | 97.31  | 15.39 | 1 |
| -3  | -6 | -13 | -0.49  | 8.03  | 2 |
| -4  | -6 | -13 | 11.72  | 9.99  | 2 |
| -5  | -6 | -13 | 52.79  | 15.11 | 2 |
| -15 | 7  | 13  | 3.42   | 7.38  | 3 |
| -14 | 7  | 13  | -5.03  | 7.59  | 3 |

|     |    |     |        |       |   |
|-----|----|-----|--------|-------|---|
| 13  | -7 | -13 | 15.24  | 10.02 | 1 |
| -13 | 7  | 13  | 61.37  | 15.84 | 3 |
| -12 | 7  | 13  | 22.05  | 11.31 | 3 |
| 12  | -7 | -13 | 31.39  | 11.14 | 1 |
| 11  | -7 | -13 | 127.71 | 18.04 | 1 |
| -11 | 7  | 13  | 107.48 | 20.08 | 3 |
| 10  | -7 | -13 | 250.04 | 23.22 | 1 |
| 9   | -7 | -13 | 32.96  | 12.38 | 1 |
| 8   | -7 | -13 | 201.19 | 21.56 | 1 |
| 7   | -7 | -13 | 218.99 | 21.98 | 1 |
| 6   | -7 | -13 | 1.72   | 7.36  | 1 |
| 5   | -7 | -13 | 135.21 | 18.04 | 1 |
| 4   | -7 | -13 | 150.71 | 18.39 | 1 |
| 3   | -7 | -13 | 21.69  | 8.52  | 1 |
| 2   | -7 | -13 | 14.41  | 7.80  | 1 |
| 2   | -7 | -13 | 8.72   | 7.47  | 2 |
| 1   | -7 | -13 | 14.35  | 8.10  | 2 |
| 1   | -7 | -13 | 22.09  | 8.38  | 1 |
| 0   | -7 | -13 | 40.25  | 12.32 | 2 |
| 0   | -7 | -13 | 42.30  | 11.04 | 1 |
| -1  | -7 | -13 | 72.36  | 15.81 | 2 |
| -1  | -7 | -13 | 82.74  | 14.64 | 1 |
| -2  | -7 | -13 | 3.72   | 8.53  | 2 |
| -2  | -7 | -13 | -4.16  | 6.96  | 1 |
| -3  | -7 | -13 | 2.07   | 8.05  | 2 |
| -4  | -7 | -13 | 2.71   | 9.21  | 2 |
| -15 | 8  | 13  | 2.02   | 8.45  | 3 |
| -14 | 8  | 13  | 27.13  | 11.93 | 3 |
| 13  | -8 | -13 | 238.36 | 22.62 | 1 |
| -13 | 8  | 13  | 206.63 | 26.60 | 3 |
| -12 | 8  | 13  | -6.65  | 9.23  | 3 |
| 12  | -8 | -13 | 6.55   | 8.40  | 1 |
| -11 | 8  | 13  | 4.20   | 8.81  | 3 |
| 11  | -8 | -13 | 12.28  | 9.08  | 1 |
| 10  | -8 | -13 | 159.78 | 19.93 | 1 |
| 9   | -8 | -13 | 10.12  | 9.15  | 1 |
| 8   | -8 | -13 | 238.65 | 23.07 | 1 |
| 7   | -8 | -13 | 10.95  | 9.82  | 1 |
| 6   | -8 | -13 | 42.80  | 12.59 | 1 |
| 5   | -8 | -13 | 45.37  | 11.86 | 1 |
| 4   | -8 | -13 | 19.06  | 8.00  | 1 |
| 3   | -8 | -13 | 98.92  | 16.75 | 1 |
| 2   | -8 | -13 | 68.13  | 13.63 | 1 |
| 1   | -8 | -13 | 125.84 | 17.52 | 1 |
| 1   | -8 | -13 | 105.70 | 18.19 | 2 |
| 0   | -8 | -13 | 96.11  | 15.65 | 1 |

|     |     |     |        |       |   |
|-----|-----|-----|--------|-------|---|
| 0   | -8  | -13 | 105.66 | 18.42 | 2 |
| -1  | -8  | -13 | 6.08   | 7.60  | 1 |
| -1  | -8  | -13 | 16.22  | 10.26 | 2 |
| -2  | -8  | -13 | 22.24  | 11.57 | 2 |
| -2  | -8  | -13 | -1.42  | 8.05  | 1 |
| -3  | -8  | -13 | 23.97  | 12.20 | 2 |
| -15 | 9   | 13  | 17.26  | 11.52 | 3 |
| -14 | 9   | 13  | -1.07  | 9.89  | 3 |
| -13 | 9   | 13  | -7.08  | 8.89  | 3 |
| -12 | 9   | 13  | 91.40  | 19.25 | 3 |
| 12  | -9  | -13 | 84.98  | 15.59 | 1 |
| 11  | -9  | -13 | 10.84  | 9.43  | 1 |
| 10  | -9  | -13 | 67.77  | 15.00 | 1 |
| 9   | -9  | -13 | -2.40  | 7.73  | 1 |
| 8   | -9  | -13 | 40.02  | 12.81 | 1 |
| 7   | -9  | -13 | 282.23 | 26.53 | 1 |
| 6   | -9  | -13 | 40.53  | 13.27 | 1 |
| 5   | -9  | -13 | 51.54  | 12.04 | 1 |
| 4   | -9  | -13 | 0.92   | 6.82  | 1 |
| 3   | -9  | -13 | 65.01  | 13.73 | 1 |
| 2   | -9  | -13 | 56.76  | 13.23 | 1 |
| 1   | -9  | -13 | 52.40  | 13.24 | 2 |
| 1   | -9  | -13 | 53.50  | 12.70 | 1 |
| 0   | -9  | -13 | 2.24   | 8.02  | 2 |
| 0   | -9  | -13 | 1.63   | 6.54  | 1 |
| -1  | -9  | -13 | 69.41  | 14.03 | 1 |
| -1  | -9  | -13 | 45.71  | 13.82 | 2 |
| -2  | -9  | -13 | 84.81  | 16.65 | 1 |
| -2  | -9  | -13 | 78.44  | 17.73 | 2 |
| -14 | 10  | 13  | 0.58   | 10.46 | 3 |
| -13 | 10  | 13  | 0.16   | 10.05 | 3 |
| 12  | -10 | -13 | 8.91   | 9.56  | 1 |
| 11  | -10 | -13 | 122.63 | 18.83 | 1 |
| 10  | -10 | -13 | 44.51  | 12.31 | 1 |
| 9   | -10 | -13 | 58.20  | 15.69 | 1 |
| 8   | -10 | -13 | -0.97  | 8.07  | 1 |
| 7   | -10 | -13 | 115.39 | 18.81 | 1 |
| 6   | -10 | -13 | -2.30  | 7.92  | 1 |
| 5   | -10 | -13 | 78.77  | 15.56 | 1 |
| 4   | -10 | -13 | 61.55  | 14.31 | 1 |
| 3   | -10 | -13 | 103.71 | 17.93 | 1 |
| 2   | -10 | -13 | 7.51   | 9.40  | 1 |
| 1   | -10 | -13 | 31.55  | 11.20 | 1 |
| 1   | -10 | -13 | 22.43  | 10.66 | 2 |
| 0   | -10 | -13 | 42.59  | 12.74 | 1 |
| 0   | -10 | -13 | 55.51  | 15.10 | 2 |

|    |     |     |        |       |   |
|----|-----|-----|--------|-------|---|
| -1 | -10 | -13 | -0.77  | 7.93  | 2 |
| -1 | -10 | -13 | 9.29   | 9.19  | 1 |
| 12 | -11 | -13 | 0.94   | 7.64  | 1 |
| 11 | -11 | -13 | 18.80  | 9.74  | 1 |
| 10 | -11 | -13 | 63.33  | 15.21 | 1 |
| 9  | -11 | -13 | 176.53 | 22.05 | 1 |
| 8  | -11 | -13 | 16.52  | 10.35 | 1 |
| 7  | -11 | -13 | 9.64   | 9.65  | 1 |
| 6  | -11 | -13 | 49.23  | 13.64 | 1 |
| 5  | -11 | -13 | 23.61  | 10.87 | 1 |
| 4  | -11 | -13 | 74.60  | 16.41 | 1 |
| 3  | -11 | -13 | 0.61   | 7.80  | 1 |
| 2  | -11 | -13 | 21.52  | 11.04 | 1 |
| 1  | -11 | -13 | -6.03  | 9.02  | 1 |
| 0  | -11 | -13 | 15.62  | 10.63 | 2 |
| 0  | -11 | -13 | 23.34  | 11.45 | 1 |
| 12 | -12 | -13 | 4.81   | 8.71  | 1 |
| 11 | -12 | -13 | 20.36  | 10.39 | 1 |
| 10 | -12 | -13 | -1.54  | 7.90  | 1 |
| 9  | -12 | -13 | -9.78  | 7.20  | 1 |
| 8  | -12 | -13 | 0.35   | 7.65  | 1 |
| 7  | -12 | -13 | -6.09  | 7.37  | 1 |
| 6  | -12 | -13 | -15.11 | 6.21  | 1 |
| 5  | -12 | -13 | 58.84  | 15.31 | 1 |
| 4  | -12 | -13 | -1.80  | 9.94  | 1 |
| 3  | -12 | -13 | 47.68  | 14.15 | 1 |
| 2  | -12 | -13 | -5.60  | 8.57  | 1 |
| 9  | -13 | -13 | 3.33   | 7.61  | 1 |
| 8  | -13 | -13 | 4.23   | 8.34  | 1 |
| 7  | -13 | -13 | 3.20   | 7.56  | 1 |
| 6  | -13 | -13 | -1.90  | 7.56  | 1 |
| 5  | -13 | -13 | 9.80   | 9.83  | 1 |
| 1  | 18  | -14 | 48.28  | 12.51 | 1 |
| 0  | 18  | -14 | 9.32   | 7.69  | 1 |
| -1 | 18  | -14 | -4.22  | 7.20  | 1 |
| -2 | 18  | -14 | 7.80   | 6.98  | 1 |
| 3  | 17  | -14 | -0.92  | 7.83  | 1 |
| 2  | 17  | -14 | -1.80  | 6.49  | 1 |
| 1  | 17  | -14 | 6.61   | 7.85  | 1 |
| 0  | 17  | -14 | -5.43  | 4.99  | 1 |
| -1 | 17  | -14 | 19.83  | 8.22  | 1 |
| -2 | 17  | -14 | 27.99  | 10.14 | 1 |
| -5 | 17  | -14 | -3.00  | 7.88  | 2 |
| 6  | 16  | -14 | 6.45   | 7.01  | 1 |
| 5  | 16  | -14 | 0.54   | 6.36  | 1 |
| 4  | 16  | -14 | 69.53  | 15.36 | 1 |

|    |    |     |        |       |   |
|----|----|-----|--------|-------|---|
| 3  | 16 | -14 | 6.38   | 7.69  | 1 |
| 2  | 16 | -14 | 19.15  | 8.58  | 1 |
| 1  | 16 | -14 | 11.86  | 8.81  | 1 |
| 0  | 16 | -14 | 17.21  | 7.71  | 1 |
| -1 | 16 | -14 | 2.69   | 5.89  | 1 |
| -2 | 16 | -14 | 4.47   | 6.50  | 1 |
| -3 | 16 | -14 | 139.56 | 17.81 | 1 |
| -4 | 16 | -14 | 6.25   | 8.37  | 2 |
| -5 | 16 | -14 | 42.92  | 13.25 | 2 |
| -6 | 16 | -14 | 13.79  | 10.32 | 2 |
| 7  | 15 | -14 | 7.67   | 7.26  | 1 |
| 6  | 15 | -14 | -4.64  | 6.74  | 1 |
| 5  | 15 | -14 | 2.49   | 8.22  | 1 |
| 4  | 15 | -14 | 13.21  | 7.57  | 1 |
| 3  | 15 | -14 | 77.47  | 14.82 | 1 |
| 2  | 15 | -14 | 7.59   | 6.95  | 1 |
| 1  | 15 | -14 | 297.16 | 23.91 | 1 |
| 0  | 15 | -14 | 57.26  | 11.89 | 1 |
| -1 | 15 | -14 | 8.04   | 6.82  | 1 |
| -2 | 15 | -14 | 50.60  | 11.49 | 1 |
| -3 | 15 | -14 | 44.75  | 10.08 | 1 |
| -4 | 15 | -14 | 50.84  | 13.90 | 2 |
| -5 | 15 | -14 | 29.17  | 12.39 | 2 |
| -6 | 15 | -14 | -4.19  | 7.18  | 2 |
| -7 | 15 | -14 | 13.24  | 11.16 | 2 |
| 8  | 14 | -14 | 7.98   | 7.72  | 1 |
| 7  | 14 | -14 | 6.49   | 8.60  | 1 |
| 6  | 14 | -14 | 114.40 | 18.46 | 1 |
| 5  | 14 | -14 | 73.02  | 15.27 | 1 |
| 4  | 14 | -14 | 37.59  | 10.51 | 1 |
| 3  | 14 | -14 | 0.54   | 5.20  | 1 |
| 2  | 14 | -14 | 18.05  | 7.33  | 1 |
| 1  | 14 | -14 | 25.31  | 8.73  | 1 |
| 0  | 14 | -14 | 14.69  | 7.40  | 1 |
| -1 | 14 | -14 | 57.06  | 12.24 | 1 |
| -2 | 14 | -14 | 68.72  | 12.56 | 1 |
| -3 | 14 | -14 | 59.11  | 11.82 | 1 |
| -3 | 14 | -14 | 63.38  | 14.47 | 2 |
| -4 | 14 | -14 | 6.92   | 9.49  | 2 |
| -5 | 14 | -14 | 21.09  | 10.96 | 2 |
| -6 | 14 | -14 | 93.32  | 17.98 | 2 |
| -7 | 14 | -14 | 1.09   | 8.77  | 2 |
| -8 | 14 | -14 | 6.48   | 10.27 | 2 |
| 10 | 13 | -14 | 16.16  | 11.13 | 1 |
| 9  | 13 | -14 | 58.05  | 15.31 | 1 |
| 8  | 13 | -14 | 36.87  | 10.51 | 1 |

|    |    |     |        |       |   |
|----|----|-----|--------|-------|---|
| 7  | 13 | -14 | 4.11   | 8.89  | 1 |
| 6  | 13 | -14 | -0.15  | 7.32  | 1 |
| 5  | 13 | -14 | 6.24   | 7.67  | 1 |
| 4  | 13 | -14 | 66.44  | 13.21 | 1 |
| 3  | 13 | -14 | 95.83  | 15.54 | 1 |
| 2  | 13 | -14 | 32.65  | 10.25 | 1 |
| 1  | 13 | -14 | 1.50   | 5.02  | 1 |
| 0  | 13 | -14 | 168.57 | 18.61 | 1 |
| -1 | 13 | -14 | 65.13  | 12.21 | 1 |
| -2 | 13 | -14 | 95.32  | 13.90 | 1 |
| -3 | 13 | -14 | 4.30   | 6.16  | 1 |
| -3 | 13 | -14 | 3.56   | 7.99  | 2 |
| -4 | 13 | -14 | 285.78 | 25.06 | 2 |
| -5 | 13 | -14 | 1.78   | 8.19  | 2 |
| -6 | 13 | -14 | 3.20   | 8.33  | 2 |
| -7 | 13 | -14 | 31.07  | 12.40 | 2 |
| -8 | 13 | -14 | 4.13   | 7.86  | 2 |
| 10 | 12 | -14 | 11.08  | 10.01 | 1 |
| 9  | 12 | -14 | 39.12  | 12.52 | 1 |
| 8  | 12 | -14 | 1.98   | 8.14  | 1 |
| 7  | 12 | -14 | 25.43  | 10.65 | 1 |
| 6  | 12 | -14 | 15.14  | 8.89  | 1 |
| 5  | 12 | -14 | 40.39  | 11.18 | 1 |
| 4  | 12 | -14 | 2.54   | 5.95  | 1 |
| 3  | 12 | -14 | -0.04  | 5.03  | 1 |
| 2  | 12 | -14 | 132.60 | 17.10 | 1 |
| 1  | 12 | -14 | 0.21   | 5.45  | 1 |
| 0  | 12 | -14 | 156.89 | 17.56 | 1 |
| -1 | 12 | -14 | 17.73  | 6.93  | 1 |
| -2 | 12 | -14 | 5.82   | 6.25  | 1 |
| -3 | 12 | -14 | 398.25 | 27.94 | 2 |
| -3 | 12 | -14 | 372.96 | 24.14 | 1 |
| -4 | 12 | -14 | 344.29 | 27.34 | 2 |
| -5 | 12 | -14 | 19.31  | 9.35  | 2 |
| -6 | 12 | -14 | -1.68  | 7.25  | 2 |
| -7 | 12 | -14 | 20.27  | 10.50 | 2 |
| -8 | 12 | -14 | 4.48   | 7.77  | 2 |
| 11 | 11 | -14 | 101.61 | 17.86 | 1 |
| 10 | 11 | -14 | 2.95   | 7.79  | 1 |
| 9  | 11 | -14 | 6.06   | 8.51  | 1 |
| 8  | 11 | -14 | 65.34  | 14.47 | 1 |
| 7  | 11 | -14 | 0.11   | 7.66  | 1 |
| 6  | 11 | -14 | 436.32 | 30.50 | 1 |
| 5  | 11 | -14 | 240.52 | 23.64 | 1 |
| 4  | 11 | -14 | 19.48  | 8.05  | 1 |
| 3  | 11 | -14 | 79.64  | 13.10 | 1 |

|    |    |     |        |       |   |
|----|----|-----|--------|-------|---|
| 2  | 11 | -14 | 78.64  | 13.80 | 1 |
| 1  | 11 | -14 | 23.29  | 7.62  | 1 |
| 0  | 11 | -14 | 99.92  | 14.07 | 1 |
| -1 | 11 | -14 | 139.43 | 15.91 | 1 |
| -2 | 11 | -14 | 173.26 | 17.06 | 1 |
| -3 | 11 | -14 | -4.38  | 6.42  | 2 |
| -3 | 11 | -14 | -6.50  | 3.52  | 1 |
| -4 | 11 | -14 | 12.80  | 8.35  | 2 |
| -5 | 11 | -14 | 206.06 | 22.20 | 2 |
| -6 | 11 | -14 | 16.95  | 9.11  | 2 |
| -7 | 11 | -14 | 129.65 | 20.26 | 2 |
| -8 | 11 | -14 | 2.60   | 8.53  | 2 |
| -9 | 11 | -14 | 6.65   | 8.91  | 2 |
| 12 | 10 | -14 | 66.89  | 14.22 | 1 |
| 11 | 10 | -14 | 55.65  | 14.72 | 1 |
| 10 | 10 | -14 | 17.89  | 10.02 | 1 |
| 9  | 10 | -14 | 13.02  | 9.09  | 1 |
| 8  | 10 | -14 | 240.26 | 24.30 | 1 |
| 7  | 10 | -14 | 28.90  | 11.20 | 1 |
| 6  | 10 | -14 | 4.60   | 7.82  | 1 |
| 5  | 10 | -14 | 10.52  | 8.07  | 1 |
| 4  | 10 | -14 | 326.19 | 23.96 | 1 |
| 3  | 10 | -14 | 88.13  | 14.14 | 1 |
| 2  | 10 | -14 | 17.19  | 6.59  | 1 |
| 1  | 10 | -14 | 53.87  | 10.72 | 1 |
| 0  | 10 | -14 | 126.80 | 15.32 | 1 |
| -1 | 10 | -14 | 260.31 | 19.65 | 1 |
| -2 | 10 | -14 | 129.63 | 16.30 | 2 |
| -2 | 10 | -14 | 150.28 | 15.46 | 1 |
| -3 | 10 | -14 | 38.89  | 8.86  | 1 |
| -3 | 10 | -14 | 57.99  | 12.55 | 2 |
| -4 | 10 | -14 | -0.11  | 6.31  | 2 |
| -5 | 10 | -14 | 22.24  | 10.14 | 2 |
| -6 | 10 | -14 | 5.72   | 8.45  | 2 |
| -7 | 10 | -14 | 10.59  | 7.39  | 2 |
| -8 | 10 | -14 | 57.29  | 14.39 | 2 |
| -9 | 10 | -14 | 18.53  | 10.06 | 2 |
| 12 | 9  | -14 | 16.82  | 11.40 | 1 |
| 11 | 9  | -14 | 11.67  | 8.99  | 1 |
| 10 | 9  | -14 | 45.65  | 12.35 | 1 |
| 9  | 9  | -14 | 12.98  | 8.65  | 1 |
| 8  | 9  | -14 | 177.71 | 21.02 | 1 |
| 7  | 9  | -14 | 134.69 | 18.24 | 1 |
| 6  | 9  | -14 | -4.11  | 5.79  | 1 |
| 5  | 9  | -14 | 5.13   | 6.69  | 1 |
| 4  | 9  | -14 | 44.31  | 9.86  | 1 |



|    |       |        |       |   |
|----|-------|--------|-------|---|
| 3  | 9 -14 | 26.45  | 7.62  | 1 |
| 2  | 9 -14 | 18.76  | 6.74  | 1 |
| 1  | 9 -14 | 112.32 | 14.31 | 1 |
| 0  | 9 -14 | 13.67  | 5.39  | 1 |
| -1 | 9 -14 | 8.73   | 5.88  | 1 |
| -2 | 9 -14 | 4.19   | 6.47  | 2 |
| -2 | 9 -14 | 1.80   | 4.26  | 1 |
| -3 | 9 -14 | 0.90   | 6.80  | 2 |
| -3 | 9 -14 | 2.31   | 4.20  | 1 |
| -4 | 9 -14 | 125.32 | 17.57 | 2 |
| -5 | 9 -14 | 140.28 | 19.30 | 2 |
| -6 | 9 -14 | 20.02  | 9.01  | 2 |
| -7 | 9 -14 | -0.30  | 7.40  | 2 |
| -8 | 9 -14 | 12.82  | 9.38  | 2 |
| -9 | 9 -14 | -0.52  | 7.83  | 2 |
| 12 | 8 -14 | 4.11   | 8.34  | 1 |
| 11 | 8 -14 | -6.67  | 7.80  | 1 |
| 10 | 8 -14 | 17.39  | 9.60  | 1 |
| 9  | 8 -14 | -2.71  | 7.31  | 1 |
| 8  | 8 -14 | 118.53 | 17.73 | 1 |
| 7  | 8 -14 | 74.56  | 14.54 | 1 |
| 6  | 8 -14 | 136.37 | 17.59 | 1 |
| 5  | 8 -14 | 55.94  | 11.86 | 1 |
| 4  | 8 -14 | 4.00   | 4.90  | 1 |
| 3  | 8 -14 | 97.16  | 14.37 | 1 |
| 2  | 8 -14 | 138.82 | 15.85 | 1 |
| 1  | 8 -14 | 1.09   | 4.10  | 1 |
| 0  | 8 -14 | 22.26  | 6.95  | 1 |
| -1 | 8 -14 | 3.05   | 3.98  | 1 |
| -2 | 8 -14 | 25.58  | 8.86  | 2 |
| -2 | 8 -14 | 25.82  | 7.62  | 1 |
| -3 | 8 -14 | 3.62   | 6.30  | 2 |
| -4 | 8 -14 | 5.19   | 6.66  | 2 |
| -5 | 8 -14 | 31.01  | 10.67 | 2 |
| -6 | 8 -14 | 187.02 | 21.44 | 2 |
| -7 | 8 -14 | 10.37  | 8.34  | 2 |
| -8 | 8 -14 | 9.22   | 8.76  | 2 |
| -9 | 8 -14 | 38.79  | 12.50 | 2 |
| 12 | 7 -14 | -11.77 | 6.41  | 1 |
| 11 | 7 -14 | 1.91   | 7.39  | 1 |
| 10 | 7 -14 | 1.87   | 7.02  | 1 |
| 9  | 7 -14 | 84.23  | 15.37 | 1 |
| 8  | 7 -14 | 38.60  | 11.80 | 1 |
| 7  | 7 -14 | 12.37  | 7.35  | 1 |
| 6  | 7 -14 | 5.69   | 6.41  | 1 |
| 5  | 7 -14 | -10.41 | 3.83  | 1 |

|     |       |        |       |   |
|-----|-------|--------|-------|---|
| 4   | 7-14  | 8.84   | 5.08  | 1 |
| 3   | 7-14  | 7.51   | 5.68  | 1 |
| 2   | 7-14  | 0.71   | 3.58  | 1 |
| 1   | 7-14  | 117.21 | 14.07 | 1 |
| 0   | 7-14  | 28.72  | 7.82  | 1 |
| -1  | 7-14  | 10.76  | 5.66  | 1 |
| -2  | 7-14  | 268.36 | 19.14 | 1 |
| -2  | 7-14  | 307.87 | 22.02 | 2 |
| -3  | 7-14  | 4.74   | 5.68  | 2 |
| -4  | 7-14  | 2.22   | 6.67  | 2 |
| -5  | 7-14  | 192.60 | 20.91 | 2 |
| -6  | 7-14  | 32.32  | 11.06 | 2 |
| -7  | 7-14  | 2.74   | 6.76  | 2 |
| -8  | 7-14  | -1.73  | 6.37  | 2 |
| -9  | 7-14  | 25.42  | 9.63  | 2 |
| -14 | -6 14 | 25.07  | 12.09 | 3 |
| -13 | -6 14 | 17.53  | 10.05 | 3 |
| -12 | -6 14 | -6.33  | 6.49  | 3 |
| 12  | 6 -14 | 3.02   | 8.81  | 1 |
| -11 | -6 14 | 22.60  | 10.05 | 3 |
| 11  | 6 -14 | 10.09  | 7.89  | 1 |
| 10  | 6 -14 | 56.77  | 13.51 | 1 |
| -10 | -6 14 | 53.10  | 12.63 | 3 |
| 9   | 6 -14 | 40.84  | 11.52 | 1 |
| -9  | -6 14 | 34.54  | 9.53  | 3 |
| -8  | -6 14 | 145.42 | 17.35 | 3 |
| 8   | 6 -14 | 202.74 | 20.51 | 1 |
| -7  | -6 14 | 3.67   | 5.65  | 3 |
| 7   | 6 -14 | -2.16  | 5.48  | 1 |
| 6   | 6 -14 | -1.21  | 4.87  | 1 |
| -6  | -6 14 | -4.06  | 4.16  | 3 |
| 5   | 6 -14 | 5.78   | 5.44  | 1 |
| 4   | 6 -14 | 129.67 | 15.68 | 1 |
| 3   | 6 -14 | 203.68 | 17.11 | 1 |
| 2   | 6 -14 | 52.75  | 10.04 | 1 |
| 1   | 6 -14 | 21.59  | 6.58  | 1 |
| 0   | 6 -14 | 41.00  | 9.11  | 1 |
| -1  | 6 -14 | 43.04  | 8.83  | 1 |
| -2  | 6 -14 | 37.21  | 8.29  | 1 |
| -2  | 6 -14 | 47.14  | 9.94  | 2 |
| -3  | 6 -14 | 198.16 | 18.06 | 2 |
| -4  | 6 -14 | 102.50 | 15.01 | 2 |
| -5  | 6 -14 | 73.01  | 13.94 | 2 |
| -6  | 6 -14 | -2.38  | 6.61  | 2 |
| -7  | 6 -14 | 5.73   | 7.92  | 2 |
| -8  | 6 -14 | -1.13  | 6.67  | 2 |

|     |    |     |        |       |   |
|-----|----|-----|--------|-------|---|
| -9  | 6  | -14 | 0.16   | 5.55  | 2 |
| -15 | -5 | 14  | -8.94  | 9.07  | 3 |
| -14 | -5 | 14  | 4.54   | 10.14 | 3 |
| -13 | -5 | 14  | 3.16   | 7.65  | 3 |
| 12  | 5  | -14 | 62.50  | 13.15 | 1 |
| -12 | -5 | 14  | 34.55  | 11.55 | 3 |
| -11 | -5 | 14  | 42.94  | 11.94 | 3 |
| 11  | 5  | -14 | 38.27  | 11.35 | 1 |
| 10  | 5  | -14 | 19.19  | 9.75  | 1 |
| -10 | -5 | 14  | 12.64  | 7.68  | 3 |
| 9   | 5  | -14 | 24.91  | 9.17  | 1 |
| -9  | -5 | 14  | 32.55  | 10.39 | 3 |
| -8  | -5 | 14  | 33.14  | 9.29  | 3 |
| 8   | 5  | -14 | 12.02  | 7.54  | 1 |
| 7   | 5  | -14 | 12.14  | 6.72  | 1 |
| -7  | -5 | 14  | 30.30  | 9.02  | 3 |
| 6   | 5  | -14 | 9.67   | 6.50  | 1 |
| -6  | -5 | 14  | 4.67   | 6.24  | 3 |
| 5   | 5  | -14 | 354.46 | 24.00 | 1 |
| 4   | 5  | -14 | 373.49 | 24.28 | 1 |
| 3   | 5  | -14 | 40.37  | 9.29  | 1 |
| 2   | 5  | -14 | 41.62  | 9.48  | 1 |
| 1   | 5  | -14 | 51.86  | 9.76  | 1 |
| 0   | 5  | -14 | 9.45   | 5.35  | 1 |
| -1  | 5  | -14 | 74.69  | 11.00 | 2 |
| -2  | 5  | -14 | 28.51  | 8.47  | 2 |
| -2  | 5  | -14 | 23.62  | 6.80  | 1 |
| -3  | 5  | -14 | 23.18  | 8.70  | 2 |
| -4  | 5  | -14 | 16.40  | 7.97  | 2 |
| -5  | 5  | -14 | 3.51   | 7.11  | 2 |
| -6  | 5  | -14 | 10.65  | 8.83  | 2 |
| -7  | 5  | -14 | 8.76   | 8.14  | 2 |
| -8  | 5  | -14 | 21.88  | 10.73 | 2 |
| -9  | 5  | -14 | 4.73   | 6.73  | 2 |
| -15 | -4 | 14  | 16.35  | 11.25 | 3 |
| -14 | -4 | 14  | 47.99  | 14.21 | 3 |
| -13 | -4 | 14  | 219.62 | 24.31 | 3 |
| -12 | -4 | 14  | 17.52  | 9.38  | 3 |
| 12  | 4  | -14 | 0.88   | 7.05  | 1 |
| -11 | -4 | 14  | -0.62  | 6.23  | 3 |
| 11  | 4  | -14 | 1.21   | 6.69  | 1 |
| 10  | 4  | -14 | 203.13 | 20.62 | 1 |
| -10 | -4 | 14  | 203.67 | 21.24 | 3 |
| 9   | 4  | -14 | 18.69  | 8.70  | 1 |
| -9  | -4 | 14  | 26.30  | 9.50  | 3 |
| 8   | 4  | -14 | 145.96 | 17.45 | 1 |

|     |    |     |        |       |   |
|-----|----|-----|--------|-------|---|
| -8  | -4 | 14  | 152.85 | 18.30 | 3 |
| 7   | 4  | -14 | 46.87  | 11.36 | 1 |
| -7  | -4 | 14  | 44.90  | 11.31 | 3 |
| 6   | 4  | -14 | 33.52  | 9.84  | 1 |
| -6  | -4 | 14  | 29.07  | 9.20  | 3 |
| 5   | 4  | -14 | 301.87 | 21.31 | 1 |
| 4   | 4  | -14 | 32.18  | 8.37  | 1 |
| 3   | 4  | -14 | 44.41  | 9.39  | 1 |
| 2   | 4  | -14 | -3.13  | 3.16  | 1 |
| 1   | 4  | -14 | 137.10 | 14.52 | 1 |
| 0   | 4  | -14 | 49.33  | 9.41  | 1 |
| -1  | 4  | -14 | 47.25  | 9.35  | 1 |
| -2  | 4  | -14 | 230.97 | 17.29 | 1 |
| -2  | 4  | -14 | 272.01 | 19.70 | 2 |
| -3  | 4  | -14 | 165.27 | 17.63 | 2 |
| -4  | 4  | -14 | -0.56  | 4.76  | 2 |
| -5  | 4  | -14 | 88.76  | 14.80 | 2 |
| -6  | 4  | -14 | 2.34   | 7.52  | 2 |
| -7  | 4  | -14 | 2.97   | 6.83  | 2 |
| -8  | 4  | -14 | 43.90  | 12.34 | 2 |
| -9  | 4  | -14 | 0.01   | 6.26  | 2 |
| -15 | -3 | 14  | 78.84  | 17.61 | 3 |
| -14 | -3 | 14  | 39.63  | 13.42 | 3 |
| -13 | -3 | 14  | 29.21  | 10.42 | 3 |
| 13  | 3  | -14 | 34.11  | 10.97 | 1 |
| 12  | 3  | -14 | 134.24 | 17.71 | 1 |
| -12 | -3 | 14  | 147.91 | 19.94 | 3 |
| 11  | 3  | -14 | 19.41  | 9.04  | 1 |
| -11 | -3 | 14  | 12.89  | 8.38  | 3 |
| 10  | 3  | -14 | 116.38 | 16.13 | 1 |
| -10 | -3 | 14  | 136.63 | 18.04 | 3 |
| -9  | -3 | 14  | -3.48  | 5.45  | 3 |
| 9   | 3  | -14 | -2.07  | 6.16  | 1 |
| 8   | 3  | -14 | -1.45  | 5.08  | 1 |
| -8  | -3 | 14  | 5.81   | 6.35  | 3 |
| 7   | 3  | -14 | 120.27 | 15.91 | 1 |
| -7  | -3 | 14  | 125.93 | 16.81 | 3 |
| -6  | -3 | 14  | 171.76 | 18.62 | 3 |
| 6   | 3  | -14 | 207.68 | 19.32 | 1 |
| 5   | 3  | -14 | 81.67  | 12.32 | 1 |
| 4   | 3  | -14 | 77.45  | 11.89 | 1 |
| 3   | 3  | -14 | 13.33  | 5.81  | 1 |
| 2   | 3  | -14 | 37.75  | 8.71  | 1 |
| 1   | 3  | -14 | 62.80  | 10.68 | 1 |
| 0   | 3  | -14 | 15.07  | 6.10  | 1 |
| -1  | 3  | -14 | 3.02   | 4.13  | 2 |

|     |    |     |        |       |   |
|-----|----|-----|--------|-------|---|
| -1  | 3  | -14 | 43.13  | 8.87  | 1 |
| -2  | 3  | -14 | 7.37   | 6.08  | 2 |
| -2  | 3  | -14 | 5.52   | 4.76  | 1 |
| -3  | 3  | -14 | 23.60  | 8.19  | 2 |
| -4  | 3  | -14 | 14.93  | 8.42  | 2 |
| -5  | 3  | -14 | 8.07   | 7.21  | 2 |
| -6  | 3  | -14 | 85.08  | 15.98 | 2 |
| -7  | 3  | -14 | 4.18   | 6.97  | 2 |
| -8  | 3  | -14 | 8.38   | 7.52  | 2 |
| -9  | 3  | -14 | -1.14  | 6.40  | 2 |
| -15 | -2 | 14  | 60.21  | 16.31 | 3 |
| -14 | -2 | 14  | 8.09   | 9.23  | 3 |
| 13  | 2  | -14 | 50.90  | 13.20 | 1 |
| -13 | -2 | 14  | 49.99  | 13.21 | 3 |
| 12  | 2  | -14 | 285.32 | 23.73 | 1 |
| -12 | -2 | 14  | 286.45 | 25.20 | 3 |
| 11  | 2  | -14 | 0.76   | 6.97  | 1 |
| -11 | -2 | 14  | -12.80 | 4.80  | 3 |
| 10  | 2  | -14 | 139.22 | 17.20 | 1 |
| -10 | -2 | 14  | 132.36 | 17.92 | 3 |
| -9  | -2 | 14  | 2.42   | 5.74  | 3 |
| 9   | 2  | -14 | 2.01   | 6.27  | 1 |
| 8   | 2  | -14 | 3.52   | 6.34  | 1 |
| -8  | -2 | 14  | 6.49   | 6.47  | 3 |
| -7  | -2 | 14  | 82.34  | 14.56 | 3 |
| 7   | 2  | -14 | 80.59  | 12.95 | 1 |
| 6   | 2  | -14 | 26.09  | 8.62  | 1 |
| 5   | 2  | -14 | 47.74  | 10.06 | 1 |
| 4   | 2  | -14 | 13.91  | 5.80  | 1 |
| 3   | 2  | -14 | 137.05 | 15.05 | 1 |
| 2   | 2  | -14 | 0.21   | 3.69  | 1 |
| 1   | 2  | -14 | -2.45  | 3.61  | 1 |
| 0   | 2  | -14 | 256.72 | 18.48 | 1 |
| -1  | 2  | -14 | 106.79 | 13.79 | 2 |
| -1  | 2  | -14 | 136.56 | 14.42 | 1 |
| -2  | 2  | -14 | 40.84  | 9.98  | 2 |
| -2  | 2  | -14 | 35.58  | 8.53  | 1 |
| -3  | 2  | -14 | 36.65  | 10.42 | 2 |
| -4  | 2  | -14 | 19.90  | 8.97  | 2 |
| -5  | 2  | -14 | 19.27  | 9.36  | 2 |
| -6  | 2  | -14 | 2.97   | 7.56  | 2 |
| -7  | 2  | -14 | 7.94   | 8.78  | 2 |
| -8  | 2  | -14 | 13.17  | 8.22  | 2 |
| -16 | -1 | 14  | 58.80  | 17.31 | 3 |
| -15 | -1 | 14  | -2.52  | 9.17  | 3 |
| -14 | -1 | 14  | 110.18 | 19.32 | 3 |

|     |    |     |        |       |   |
|-----|----|-----|--------|-------|---|
| 13  | 1  | -14 | 38.31  | 11.82 | 1 |
| -13 | -1 | 14  | 24.45  | 10.16 | 3 |
| -12 | -1 | 14  | 125.20 | 19.01 | 3 |
| 12  | 1  | -14 | 161.38 | 19.27 | 1 |
| -11 | -1 | 14  | 101.62 | 17.13 | 3 |
| 11  | 1  | -14 | 105.66 | 15.48 | 1 |
| 10  | 1  | -14 | 34.53  | 10.43 | 1 |
| -10 | -1 | 14  | 39.18  | 11.76 | 3 |
| -9  | -1 | 14  | 743.14 | 40.32 | 3 |
| 9   | 1  | -14 | 735.45 | 37.27 | 1 |
| -8  | -1 | 14  | 278.44 | 22.90 | 3 |
| 8   | 1  | -14 | 215.63 | 19.26 | 1 |
| 7   | 1  | -14 | 4.85   | 5.54  | 1 |
| -7  | -1 | 14  | -10.44 | 3.83  | 3 |
| 6   | 1  | -14 | 238.89 | 19.88 | 1 |
| 5   | 1  | -14 | 1.81   | 3.62  | 1 |
| 4   | 1  | -14 | 355.62 | 22.94 | 1 |
| 3   | 1  | -14 | 1.98   | 4.38  | 1 |
| 2   | 1  | -14 | 125.90 | 14.51 | 1 |
| 1   | 1  | -14 | 141.19 | 15.20 | 1 |
| 0   | 1  | -14 | 20.04  | 6.32  | 1 |
| -1  | 1  | -14 | 2.00   | 5.07  | 2 |
| -1  | 1  | -14 | 3.93   | 4.61  | 1 |
| -2  | 1  | -14 | -1.78  | 5.14  | 2 |
| -2  | 1  | -14 | -2.71  | 3.62  | 1 |
| -3  | 1  | -14 | 173.28 | 18.74 | 2 |
| -4  | 1  | -14 | 197.47 | 20.93 | 2 |
| -5  | 1  | -14 | -6.24  | 7.77  | 2 |
| -6  | 1  | -14 | -2.74  | 8.01  | 2 |
| -7  | 1  | -14 | 149.44 | 21.90 | 2 |
| -8  | 1  | -14 | 8.74   | 7.28  | 2 |
| -16 | 0  | 14  | 7.60   | 10.52 | 3 |
| -15 | 0  | 14  | 142.99 | 22.39 | 3 |
| -14 | 0  | 14  | 22.99  | 11.89 | 3 |
| -13 | 0  | 14  | 43.44  | 12.57 | 3 |
| 13  | 0  | -14 | 41.77  | 11.89 | 1 |
| -12 | 0  | 14  | 0.51   | 6.04  | 3 |
| 12  | 0  | -14 | -7.29  | 7.11  | 1 |
| 11  | 0  | -14 | 115.94 | 16.23 | 1 |
| -11 | 0  | 14  | 132.40 | 18.86 | 3 |
| -10 | 0  | 14  | 83.29  | 15.15 | 3 |
| 10  | 0  | -14 | 92.89  | 15.01 | 1 |
| 9   | 0  | -14 | 9.01   | 6.62  | 1 |
| -9  | 0  | 14  | 4.19   | 6.35  | 3 |
| -8  | 0  | 14  | 197.72 | 21.59 | 3 |
| 8   | 0  | -14 | 221.93 | 20.47 | 1 |

|     |    |     |        |       |   |
|-----|----|-----|--------|-------|---|
| 7   | 0  | -14 | 114.01 | 15.41 | 1 |
| -7  | 0  | 14  | 83.14  | 14.70 | 3 |
| 6   | 0  | -14 | 311.12 | 22.69 | 1 |
| 5   | 0  | -14 | 58.36  | 11.07 | 1 |
| 4   | 0  | -14 | 5.29   | 4.29  | 1 |
| 3   | 0  | -14 | 77.96  | 11.89 | 1 |
| 2   | 0  | -14 | 330.46 | 21.67 | 1 |
| 1   | 0  | -14 | 9.61   | 4.99  | 1 |
| 0   | 0  | -14 | 150.57 | 15.49 | 1 |
| -1  | 0  | -14 | 126.49 | 14.36 | 1 |
| -1  | 0  | -14 | 142.44 | 16.09 | 2 |
| -2  | 0  | -14 | 25.36  | 7.29  | 1 |
| -2  | 0  | -14 | 21.01  | 8.64  | 2 |
| -3  | 0  | -14 | 244.68 | 20.91 | 2 |
| -4  | 0  | -14 | 2.86   | 7.28  | 2 |
| -5  | 0  | -14 | 230.84 | 24.52 | 2 |
| -6  | 0  | -14 | -0.31  | 7.49  | 2 |
| -7  | 0  | -14 | 156.49 | 23.08 | 2 |
| -8  | 0  | -14 | 1.39   | 7.04  | 2 |
| -16 | 1  | 14  | 39.83  | 13.40 | 3 |
| -15 | 1  | 14  | 13.42  | 10.36 | 3 |
| -14 | 1  | 14  | 15.71  | 8.91  | 3 |
| 13  | -1 | -14 | -3.49  | 6.24  | 1 |
| -13 | 1  | 14  | -3.02  | 5.92  | 3 |
| 12  | -1 | -14 | 319.90 | 24.02 | 1 |
| -12 | 1  | 14  | 286.37 | 25.58 | 3 |
| 11  | -1 | -14 | 660.50 | 35.72 | 1 |
| -11 | 1  | 14  | 597.26 | 37.45 | 3 |
| -10 | 1  | 14  | 29.43  | 10.20 | 3 |
| 10  | -1 | -14 | 34.01  | 10.39 | 1 |
| 9   | -1 | -14 | 8.85   | 7.03  | 1 |
| -9  | 1  | 14  | -0.56  | 5.40  | 3 |
| 8   | -1 | -14 | 297.20 | 22.40 | 1 |
| -8  | 1  | 14  | 273.61 | 23.69 | 3 |
| 7   | -1 | -14 | 27.88  | 9.21  | 1 |
| 6   | -1 | -14 | 422.53 | 26.69 | 1 |
| 5   | -1 | -14 | 5.89   | 4.80  | 1 |
| 4   | -1 | -14 | 144.67 | 16.13 | 1 |
| 3   | -1 | -14 | 4.28   | 5.23  | 1 |
| 2   | -1 | -14 | 61.40  | 11.11 | 1 |
| 1   | -1 | -14 | 42.81  | 9.36  | 1 |
| 0   | -1 | -14 | 58.75  | 11.19 | 2 |
| 0   | -1 | -14 | 84.33  | 12.37 | 1 |
| -1  | -1 | -14 | 583.48 | 32.63 | 2 |
| -1  | -1 | -14 | 638.17 | 32.14 | 1 |
| -2  | -1 | -14 | 76.65  | 13.79 | 2 |

|     |    |     |        |       |   |
|-----|----|-----|--------|-------|---|
| -2  | -1 | -14 | 83.52  | 12.42 | 1 |
| -3  | -1 | -14 | 36.08  | 10.54 | 2 |
| -4  | -1 | -14 | 15.63  | 9.13  | 2 |
| -5  | -1 | -14 | 128.07 | 19.72 | 2 |
| -6  | -1 | -14 | 16.74  | 10.54 | 2 |
| -7  | -1 | -14 | 33.43  | 12.21 | 2 |
| -16 | 2  | 14  | 49.92  | 15.34 | 3 |
| -15 | 2  | 14  | 0.27   | 8.82  | 3 |
| -14 | 2  | 14  | 11.96  | 9.55  | 3 |
| 13  | -2 | -14 | 80.35  | 14.50 | 1 |
| -13 | 2  | 14  | 78.48  | 16.73 | 3 |
| -12 | 2  | 14  | 4.98   | 7.45  | 3 |
| 12  | -2 | -14 | 28.51  | 10.25 | 1 |
| -11 | 2  | 14  | 0.60   | 5.46  | 3 |
| 11  | -2 | -14 | 6.69   | 7.66  | 1 |
| -10 | 2  | 14  | 382.80 | 28.60 | 3 |
| 10  | -2 | -14 | 357.95 | 25.41 | 1 |
| 9   | -2 | -14 | 93.71  | 15.29 | 1 |
| -9  | 2  | 14  | 65.60  | 14.66 | 3 |
| 8   | -2 | -14 | 167.24 | 18.56 | 1 |
| -8  | 2  | 14  | 145.90 | 19.67 | 3 |
| 7   | -2 | -14 | 38.44  | 10.60 | 1 |
| 6   | -2 | -14 | 3.81   | 5.75  | 1 |
| 5   | -2 | -14 | 30.72  | 8.53  | 1 |
| 4   | -2 | -14 | 14.84  | 6.46  | 1 |
| 3   | -2 | -14 | 7.83   | 5.36  | 1 |
| 2   | -2 | -14 | 16.50  | 6.80  | 1 |
| 1   | -2 | -14 | 8.17   | 5.53  | 1 |
| 0   | -2 | -14 | 6.79   | 6.11  | 1 |
| 0   | -2 | -14 | 1.39   | 5.88  | 2 |
| -1  | -2 | -14 | 37.36  | 9.02  | 1 |
| -1  | -2 | -14 | 30.49  | 10.15 | 2 |
| -2  | -2 | -14 | 11.19  | 7.79  | 2 |
| -2  | -2 | -14 | 9.61   | 6.29  | 1 |
| -3  | -2 | -14 | 190.01 | 21.98 | 2 |
| -4  | -2 | -14 | 6.45   | 8.42  | 2 |
| -5  | -2 | -14 | 42.87  | 12.56 | 2 |
| -6  | -2 | -14 | 30.62  | 11.58 | 2 |
| -7  | -2 | -14 | 9.16   | 9.60  | 2 |
| -16 | 3  | 14  | 10.39  | 11.27 | 3 |
| -15 | 3  | 14  | -17.01 | 6.17  | 3 |
| -14 | 3  | 14  | 54.17  | 14.85 | 3 |
| -13 | 3  | 14  | 75.25  | 16.33 | 3 |
| 13  | -3 | -14 | 125.71 | 17.38 | 1 |
| 12  | -3 | -14 | 84.44  | 15.37 | 1 |
| -12 | 3  | 14  | 78.24  | 15.59 | 3 |



|     |    |     |        |       |   |
|-----|----|-----|--------|-------|---|
| -11 | 3  | 14  | 2.53   | 7.00  | 3 |
| 11  | -3 | -14 | 4.44   | 7.14  | 1 |
| 10  | -3 | -14 | 66.81  | 13.59 | 1 |
| -10 | 3  | 14  | 76.43  | 15.63 | 3 |
| 9   | -3 | -14 | 4.84   | 6.74  | 1 |
| -9  | 3  | 14  | 2.07   | 7.37  | 3 |
| 8   | -3 | -14 | 0.43   | 6.73  | 1 |
| 7   | -3 | -14 | 3.60   | 6.03  | 1 |
| 6   | -3 | -14 | 7.30   | 6.01  | 1 |
| 5   | -3 | -14 | -1.30  | 4.63  | 1 |
| 4   | -3 | -14 | 2.35   | 5.28  | 1 |
| 3   | -3 | -14 | 31.61  | 9.02  | 1 |
| 2   | -3 | -14 | 138.90 | 16.38 | 1 |
| 1   | -3 | -14 | 308.27 | 22.07 | 1 |
| 0   | -3 | -14 | 158.08 | 18.05 | 2 |
| 0   | -3 | -14 | 180.38 | 18.04 | 1 |
| -1  | -3 | -14 | 2.92   | 6.49  | 2 |
| -1  | -3 | -14 | 8.14   | 5.37  | 1 |
| -2  | -3 | -14 | 341.29 | 23.28 | 1 |
| -2  | -3 | -14 | 341.01 | 26.20 | 2 |
| -3  | -3 | -14 | 1.02   | 6.88  | 2 |
| -4  | -3 | -14 | 70.89  | 15.99 | 2 |
| -5  | -3 | -14 | -4.63  | 7.62  | 2 |
| -6  | -3 | -14 | 47.89  | 14.14 | 2 |
| -16 | 4  | 14  | 16.13  | 7.94  | 3 |
| -15 | 4  | 14  | 0.76   | 6.91  | 3 |
| -14 | 4  | 14  | 16.52  | 10.93 | 3 |
| 13  | -4 | -14 | -5.45  | 7.05  | 1 |
| -13 | 4  | 14  | 11.64  | 9.46  | 3 |
| 12  | -4 | -14 | 96.59  | 15.94 | 1 |
| -12 | 4  | 14  | 50.99  | 13.68 | 3 |
| -11 | 4  | 14  | 13.03  | 10.48 | 3 |
| 11  | -4 | -14 | 10.67  | 9.33  | 1 |
| -10 | 4  | 14  | 5.20   | 8.95  | 3 |
| 10  | -4 | -14 | 27.82  | 10.96 | 1 |
| 9   | -4 | -14 | 3.72   | 7.05  | 1 |
| -9  | 4  | 14  | -0.97  | 8.01  | 3 |
| 8   | -4 | -14 | 187.73 | 20.27 | 1 |
| 7   | -4 | -14 | 336.51 | 25.20 | 1 |
| 6   | -4 | -14 | 12.97  | 7.54  | 1 |
| 5   | -4 | -14 | 5.22   | 5.81  | 1 |
| 4   | -4 | -14 | 45.26  | 9.97  | 1 |
| 3   | -4 | -14 | 8.55   | 6.29  | 1 |
| 2   | -4 | -14 | 58.55  | 12.36 | 1 |
| 1   | -4 | -14 | 2.04   | 5.59  | 1 |
| 0   | -4 | -14 | 170.18 | 18.19 | 1 |

|     |    |     |        |       |   |
|-----|----|-----|--------|-------|---|
| 0   | -4 | -14 | 140.49 | 17.93 | 2 |
| -1  | -4 | -14 | 38.76  | 10.94 | 2 |
| -1  | -4 | -14 | 35.13  | 9.63  | 1 |
| -2  | -4 | -14 | 23.34  | 11.05 | 2 |
| -2  | -4 | -14 | 39.18  | 9.89  | 1 |
| -3  | -4 | -14 | 7.23   | 8.57  | 2 |
| -4  | -4 | -14 | -4.73  | 7.96  | 2 |
| -5  | -4 | -14 | 122.50 | 21.24 | 2 |
| -15 | 5  | 14  | -4.67  | 6.63  | 3 |
| -14 | 5  | 14  | 1.89   | 7.80  | 3 |
| 13  | -5 | -14 | 19.13  | 9.46  | 1 |
| -13 | 5  | 14  | 20.72  | 10.75 | 3 |
| -12 | 5  | 14  | -9.03  | 8.11  | 3 |
| 12  | -5 | -14 | 5.53   | 7.48  | 1 |
| -11 | 5  | 14  | 58.32  | 15.84 | 3 |
| 11  | -5 | -14 | 87.17  | 16.03 | 1 |
| -10 | 5  | 14  | 34.11  | 13.19 | 3 |
| 10  | -5 | -14 | 47.77  | 12.58 | 1 |
| 9   | -5 | -14 | 224.65 | 22.66 | 1 |
| 8   | -5 | -14 | 5.72   | 8.11  | 1 |
| 7   | -5 | -14 | 5.49   | 7.78  | 1 |
| 6   | -5 | -14 | -7.21  | 5.33  | 1 |
| 5   | -5 | -14 | -8.72  | 4.48  | 1 |
| 4   | -5 | -14 | 55.58  | 11.70 | 1 |
| 3   | -5 | -14 | 108.86 | 15.54 | 1 |
| 2   | -5 | -14 | 48.02  | 10.60 | 1 |
| 1   | -5 | -14 | 1.74   | 5.74  | 1 |
| 0   | -5 | -14 | 71.20  | 14.44 | 2 |
| 0   | -5 | -14 | 65.36  | 12.60 | 1 |
| -1  | -5 | -14 | 3.93   | 8.47  | 2 |
| -1  | -5 | -14 | -0.81  | 6.31  | 1 |
| -2  | -5 | -14 | 9.52   | 9.80  | 2 |
| -2  | -5 | -14 | 29.01  | 9.66  | 1 |
| -3  | -5 | -14 | 17.49  | 9.69  | 2 |
| -4  | -5 | -14 | 25.60  | 12.03 | 2 |
| -5  | -5 | -14 | -13.60 | 7.18  | 2 |
| -15 | 6  | 14  | 1.20   | 7.80  | 3 |
| -14 | 6  | 14  | 4.54   | 8.75  | 3 |
| 13  | -6 | -14 | -1.48  | 7.83  | 1 |
| -13 | 6  | 14  | 7.62   | 9.97  | 3 |
| 12  | -6 | -14 | 1.05   | 7.07  | 1 |
| -12 | 6  | 14  | 1.06   | 8.26  | 3 |
| 11  | -6 | -14 | 30.27  | 11.21 | 1 |
| -11 | 6  | 14  | 32.37  | 13.08 | 3 |
| 10  | -6 | -14 | 90.18  | 15.94 | 1 |
| 9   | -6 | -14 | 145.80 | 19.60 | 1 |

|     |    |     |        |       |   |
|-----|----|-----|--------|-------|---|
| 8   | -6 | -14 | 141.78 | 19.41 | 1 |
| 7   | -6 | -14 | 59.03  | 13.86 | 1 |
| 6   | -6 | -14 | 2.07   | 7.67  | 1 |
| 5   | -6 | -14 | 79.84  | 14.15 | 1 |
| 4   | -6 | -14 | 3.46   | 6.14  | 1 |
| 3   | -6 | -14 | 5.78   | 6.64  | 1 |
| 2   | -6 | -14 | 77.57  | 14.05 | 1 |
| 1   | -6 | -14 | 92.47  | 14.92 | 1 |
| 0   | -6 | -14 | 4.04   | 8.86  | 2 |
| 0   | -6 | -14 | 4.95   | 6.98  | 1 |
| -1  | -6 | -14 | 17.91  | 10.41 | 2 |
| -1  | -6 | -14 | 24.23  | 8.21  | 1 |
| -2  | -6 | -14 | 41.19  | 9.98  | 1 |
| -2  | -6 | -14 | 31.06  | 11.81 | 2 |
| -3  | -6 | -14 | 91.85  | 18.75 | 2 |
| -4  | -6 | -14 | 23.70  | 11.11 | 2 |
| -15 | 7  | 14  | -8.59  | 7.01  | 3 |
| -14 | 7  | 14  | 9.45   | 8.57  | 3 |
| -13 | 7  | 14  | 17.00  | 12.37 | 3 |
| 13  | -7 | -14 | 10.30  | 9.41  | 1 |
| 12  | -7 | -14 | 11.38  | 9.19  | 1 |
| -12 | 7  | 14  | 6.32   | 10.15 | 3 |
| -11 | 7  | 14  | -0.20  | 9.21  | 3 |
| 11  | -7 | -14 | -0.60  | 8.31  | 1 |
| 10  | -7 | -14 | 174.05 | 21.20 | 1 |
| 9   | -7 | -14 | 45.62  | 12.53 | 1 |
| 8   | -7 | -14 | 0.74   | 8.45  | 1 |
| 7   | -7 | -14 | 1.72   | 8.58  | 1 |
| 6   | -7 | -14 | 6.70   | 7.90  | 1 |
| 5   | -7 | -14 | 80.70  | 14.88 | 1 |
| 4   | -7 | -14 | 24.39  | 8.67  | 1 |
| 3   | -7 | -14 | 12.93  | 7.18  | 1 |
| 2   | -7 | -14 | 11.86  | 6.77  | 1 |
| 1   | -7 | -14 | 48.50  | 13.27 | 2 |
| 1   | -7 | -14 | 29.30  | 10.48 | 1 |
| 0   | -7 | -14 | 2.26   | 9.00  | 2 |
| 0   | -7 | -14 | 5.48   | 7.03  | 1 |
| -1  | -7 | -14 | 6.35   | 7.20  | 1 |
| -1  | -7 | -14 | -6.49  | 8.80  | 2 |
| -2  | -7 | -14 | -0.50  | 8.30  | 2 |
| -3  | -7 | -14 | 32.71  | 12.53 | 2 |
| -14 | 8  | 14  | 5.40   | 8.57  | 3 |
| -13 | 8  | 14  | 15.25  | 12.58 | 3 |
| 13  | -8 | -14 | 81.36  | 15.73 | 1 |
| 12  | -8 | -14 | 15.31  | 9.74  | 1 |
| -12 | 8  | 14  | 12.39  | 11.38 | 3 |

|     |     |     |        |       |   |
|-----|-----|-----|--------|-------|---|
| 11  | -8  | -14 | 21.27  | 9.90  | 1 |
| 10  | -8  | -14 | 58.17  | 14.44 | 1 |
| 9   | -8  | -14 | 0.08   | 7.83  | 1 |
| 8   | -8  | -14 | 28.36  | 11.27 | 1 |
| 7   | -8  | -14 | 55.66  | 14.00 | 1 |
| 6   | -8  | -14 | 99.19  | 17.61 | 1 |
| 5   | -8  | -14 | -3.93  | 5.87  | 1 |
| 4   | -8  | -14 | 70.37  | 14.86 | 1 |
| 3   | -8  | -14 | 140.01 | 19.38 | 1 |
| 2   | -8  | -14 | -2.41  | 7.40  | 1 |
| 1   | -8  | -14 | 84.12  | 16.41 | 2 |
| 1   | -8  | -14 | 94.79  | 16.18 | 1 |
| 0   | -8  | -14 | 34.28  | 10.09 | 1 |
| 0   | -8  | -14 | 25.80  | 12.11 | 2 |
| -1  | -8  | -14 | -3.59  | 7.83  | 2 |
| -1  | -8  | -14 | -6.95  | 7.45  | 1 |
| -2  | -8  | -14 | 6.31   | 10.71 | 2 |
| -14 | 9   | 14  | -4.40  | 9.19  | 3 |
| 13  | -9  | -14 | 29.23  | 10.73 | 1 |
| -13 | 9   | 14  | 16.39  | 11.24 | 3 |
| 12  | -9  | -14 | 242.78 | 24.87 | 1 |
| 11  | -9  | -14 | -7.52  | 7.42  | 1 |
| 10  | -9  | -14 | 48.89  | 12.99 | 1 |
| 9   | -9  | -14 | 2.32   | 7.48  | 1 |
| 8   | -9  | -14 | 10.31  | 9.20  | 1 |
| 7   | -9  | -14 | 158.99 | 21.57 | 1 |
| 6   | -9  | -14 | 6.87   | 9.13  | 1 |
| 5   | -9  | -14 | 44.24  | 11.89 | 1 |
| 4   | -9  | -14 | 5.18   | 7.93  | 1 |
| 3   | -9  | -14 | 51.27  | 12.76 | 1 |
| 2   | -9  | -14 | 14.46  | 8.51  | 1 |
| 1   | -9  | -14 | 15.81  | 9.65  | 1 |
| 1   | -9  | -14 | 6.82   | 9.00  | 2 |
| 0   | -9  | -14 | 9.39   | 8.49  | 1 |
| 0   | -9  | -14 | 12.67  | 9.78  | 2 |
| -1  | -9  | -14 | 73.94  | 15.78 | 1 |
| -1  | -9  | -14 | 126.26 | 21.31 | 2 |
| 13  | -10 | -14 | 24.82  | 10.63 | 1 |
| 12  | -10 | -14 | 30.78  | 11.82 | 1 |
| 11  | -10 | -14 | 71.26  | 15.18 | 1 |
| 10  | -10 | -14 | 1.65   | 8.00  | 1 |
| 9   | -10 | -14 | 70.02  | 15.22 | 1 |
| 8   | -10 | -14 | 29.01  | 11.27 | 1 |
| 7   | -10 | -14 | 17.76  | 9.87  | 1 |
| 6   | -10 | -14 | 4.58   | 9.99  | 1 |
| 5   | -10 | -14 | 77.12  | 15.62 | 1 |

|    |     |     |        |       |   |
|----|-----|-----|--------|-------|---|
| 4  | -10 | -14 | 21.46  | 10.70 | 1 |
| 3  | -10 | -14 | 111.40 | 19.28 | 1 |
| 2  | -10 | -14 | 19.69  | 10.15 | 1 |
| 1  | -10 | -14 | -2.70  | 8.56  | 1 |
| 0  | -10 | -14 | 37.17  | 13.13 | 1 |
| 12 | -11 | -14 | 0.06   | 8.77  | 1 |
| 11 | -11 | -14 | 47.07  | 13.31 | 1 |
| 10 | -11 | -14 | 29.31  | 10.75 | 1 |
| 9  | -11 | -14 | 1.10   | 8.36  | 1 |
| 8  | -11 | -14 | 8.19   | 8.75  | 1 |
| 7  | -11 | -14 | -0.77  | 6.85  | 1 |
| 6  | -11 | -14 | 12.28  | 8.78  | 1 |
| 5  | -11 | -14 | 53.85  | 14.50 | 1 |
| 4  | -11 | -14 | 34.21  | 12.74 | 1 |
| 3  | -11 | -14 | 90.17  | 17.81 | 1 |
| 2  | -11 | -14 | 125.50 | 21.01 | 1 |
| 9  | -12 | -14 | 8.37   | 8.23  | 1 |
| 8  | -12 | -14 | 0.47   | 7.41  | 1 |
| 7  | -12 | -14 | 0.38   | 7.56  | 1 |
| 6  | -12 | -14 | -10.49 | 7.00  | 1 |
| 2  | 17  | -15 | 24.02  | 10.51 | 1 |
| 1  | 17  | -15 | -11.00 | 6.65  | 1 |
| 0  | 17  | -15 | 16.17  | 9.23  | 1 |
| -1 | 17  | -15 | 4.00   | 7.82  | 1 |
| -2 | 17  | -15 | 12.54  | 8.18  | 1 |
| 5  | 16  | -15 | 1.56   | 7.84  | 1 |
| 4  | 16  | -15 | 38.83  | 11.25 | 1 |
| 3  | 16  | -15 | 19.04  | 10.16 | 1 |
| 2  | 16  | -15 | 6.98   | 7.07  | 1 |
| 1  | 16  | -15 | 19.84  | 8.57  | 1 |
| 0  | 16  | -15 | 28.71  | 10.25 | 1 |
| -1 | 16  | -15 | 100.28 | 16.35 | 1 |
| -2 | 16  | -15 | 92.41  | 15.65 | 1 |
| 6  | 15  | -15 | -0.58  | 6.19  | 1 |
| 5  | 15  | -15 | 97.94  | 18.35 | 1 |
| 4  | 15  | -15 | 48.36  | 12.18 | 1 |
| 3  | 15  | -15 | 18.40  | 8.97  | 1 |
| 2  | 15  | -15 | -3.17  | 6.46  | 1 |
| 1  | 15  | -15 | -10.60 | 5.56  | 1 |
| 0  | 15  | -15 | 13.12  | 8.01  | 1 |
| -1 | 15  | -15 | -13.39 | 4.13  | 1 |
| -2 | 15  | -15 | 16.60  | 7.51  | 1 |
| -5 | 15  | -15 | 9.55   | 8.91  | 2 |
| -6 | 15  | -15 | 20.22  | 11.90 | 2 |
| 8  | 14  | -15 | 1.55   | 6.19  | 1 |
| 7  | 14  | -15 | -7.11  | 5.46  | 1 |

|    |    |     |        |       |   |
|----|----|-----|--------|-------|---|
| 6  | 14 | -15 | 0.45   | 6.98  | 1 |
| 5  | 14 | -15 | 3.73   | 7.54  | 1 |
| 4  | 14 | -15 | 3.09   | 6.39  | 1 |
| 3  | 14 | -15 | 63.01  | 13.90 | 1 |
| 2  | 14 | -15 | 10.72  | 6.72  | 1 |
| 1  | 14 | -15 | -1.74  | 5.62  | 1 |
| 0  | 14 | -15 | 126.77 | 16.91 | 1 |
| -1 | 14 | -15 | 127.07 | 16.68 | 1 |
| -2 | 14 | -15 | 8.85   | 5.90  | 1 |
| -5 | 14 | -15 | 4.75   | 9.89  | 2 |
| -6 | 14 | -15 | 0.70   | 8.95  | 2 |
| 9  | 13 | -15 | 0.71   | 6.64  | 1 |
| 8  | 13 | -15 | -4.74  | 6.49  | 1 |
| 7  | 13 | -15 | 9.29   | 9.15  | 1 |
| 6  | 13 | -15 | 119.29 | 18.88 | 1 |
| 5  | 13 | -15 | 53.41  | 13.15 | 1 |
| 4  | 13 | -15 | 44.53  | 11.44 | 1 |
| 3  | 13 | -15 | 44.94  | 10.84 | 1 |
| 2  | 13 | -15 | 21.76  | 8.85  | 1 |
| 1  | 13 | -15 | 34.48  | 9.21  | 1 |
| 0  | 13 | -15 | 13.40  | 7.05  | 1 |
| -1 | 13 | -15 | -1.63  | 4.75  | 1 |
| -2 | 13 | -15 | 13.43  | 6.99  | 1 |
| -5 | 13 | -15 | 47.27  | 13.30 | 2 |
| -6 | 13 | -15 | 23.64  | 11.08 | 2 |
| -7 | 13 | -15 | 5.53   | 9.26  | 2 |
| 10 | 12 | -15 | -2.06  | 8.21  | 1 |
| 9  | 12 | -15 | 8.65   | 8.62  | 1 |
| 8  | 12 | -15 | 26.28  | 10.82 | 1 |
| 7  | 12 | -15 | 57.41  | 13.90 | 1 |
| 6  | 12 | -15 | 9.84   | 7.81  | 1 |
| 5  | 12 | -15 | 80.11  | 14.87 | 1 |
| 4  | 12 | -15 | -10.95 | 4.42  | 1 |
| 3  | 12 | -15 | 5.68   | 5.63  | 1 |
| 2  | 12 | -15 | 157.08 | 19.07 | 1 |
| 1  | 12 | -15 | 137.50 | 17.35 | 1 |
| 0  | 12 | -15 | 12.34  | 6.86  | 1 |
| -1 | 12 | -15 | -6.79  | 4.58  | 1 |
| -2 | 12 | -15 | -6.16  | 4.97  | 1 |
| -4 | 12 | -15 | 20.99  | 10.81 | 2 |
| -5 | 12 | -15 | 10.09  | 9.58  | 2 |
| -6 | 12 | -15 | 8.16   | 8.38  | 2 |
| -7 | 12 | -15 | 0.04   | 7.36  | 2 |
| 11 | 11 | -15 | 65.41  | 15.79 | 1 |
| 10 | 11 | -15 | 30.09  | 11.42 | 1 |
| 9  | 11 | -15 | 34.10  | 11.71 | 1 |

|    |    |     |        |       |   |
|----|----|-----|--------|-------|---|
| 7  | 11 | -15 | 188.30 | 22.69 | 1 |
| 6  | 11 | -15 | -2.54  | 6.71  | 1 |
| 5  | 11 | -15 | 85.04  | 14.08 | 1 |
| 4  | 11 | -15 | 95.63  | 15.83 | 1 |
| 3  | 11 | -15 | 0.13   | 5.04  | 1 |
| 2  | 11 | -15 | 92.24  | 15.03 | 1 |
| 1  | 11 | -15 | 88.74  | 14.49 | 1 |
| 0  | 11 | -15 | 71.25  | 13.07 | 1 |
| -1 | 11 | -15 | 118.23 | 15.58 | 1 |
| -2 | 11 | -15 | 150.70 | 16.57 | 1 |
| -4 | 11 | -15 | 131.57 | 19.07 | 2 |
| -5 | 11 | -15 | 91.78  | 16.76 | 2 |
| -6 | 11 | -15 | 21.28  | 9.88  | 2 |
| -7 | 11 | -15 | 31.63  | 11.41 | 2 |
| -8 | 11 | -15 | 0.76   | 7.32  | 2 |
| 11 | 10 | -15 | 7.95   | 8.93  | 1 |
| 10 | 10 | -15 | 64.48  | 15.46 | 1 |
| 9  | 10 | -15 | 20.27  | 9.56  | 1 |
| 8  | 10 | -15 | 62.15  | 14.49 | 1 |
| 7  | 10 | -15 | 29.43  | 11.00 | 1 |
| 6  | 10 | -15 | 8.52   | 8.22  | 1 |
| 5  | 10 | -15 | 124.06 | 17.34 | 1 |
| 4  | 10 | -15 | 274.77 | 22.34 | 1 |
| 3  | 10 | -15 | 16.61  | 7.26  | 1 |
| 2  | 10 | -15 | 31.43  | 9.16  | 1 |
| 1  | 10 | -15 | 79.91  | 13.26 | 1 |
| 0  | 10 | -15 | -2.05  | 4.59  | 1 |
| -1 | 10 | -15 | 121.60 | 15.13 | 1 |
| -2 | 10 | -15 | 1.22   | 5.23  | 1 |
| -4 | 10 | -15 | -5.86  | 6.57  | 2 |
| -5 | 10 | -15 | 10.65  | 8.73  | 2 |
| -6 | 10 | -15 | 6.97   | 8.08  | 2 |
| -7 | 10 | -15 | 0.48   | 7.49  | 2 |
| -8 | 10 | -15 | 159.91 | 22.83 | 2 |
| 12 | 9  | -15 | -6.14  | 8.05  | 1 |
| 11 | 9  | -15 | 37.54  | 12.58 | 1 |
| 10 | 9  | -15 | 163.82 | 21.39 | 1 |
| 9  | 9  | -15 | 6.46   | 8.23  | 1 |
| 8  | 9  | -15 | 11.20  | 8.42  | 1 |
| 7  | 9  | -15 | 8.87   | 8.63  | 1 |
| 6  | 9  | -15 | 49.89  | 12.26 | 1 |
| 5  | 9  | -15 | -0.70  | 5.62  | 1 |
| 4  | 9  | -15 | 11.86  | 7.03  | 1 |
| 3  | 9  | -15 | 419.81 | 27.45 | 1 |
| 2  | 9  | -15 | 2.97   | 5.19  | 1 |
| 1  | 9  | -15 | 177.97 | 18.03 | 1 |

|    |       |        |       |   |
|----|-------|--------|-------|---|
| 0  | 9 -15 | 35.78  | 8.94  | 1 |
| -1 | 9 -15 | 7.58   | 5.30  | 1 |
| -2 | 9 -15 | 603.65 | 31.77 | 1 |
| -3 | 9 -15 | 240.49 | 21.02 | 2 |
| -4 | 9 -15 | 99.96  | 16.73 | 2 |
| -5 | 9 -15 | -3.69  | 6.72  | 2 |
| -6 | 9 -15 | 43.02  | 12.96 | 2 |
| -7 | 9 -15 | 4.60   | 7.56  | 2 |
| -8 | 9 -15 | 28.66  | 11.70 | 2 |
| 12 | 8 -15 | 58.20  | 15.04 | 1 |
| 11 | 8 -15 | 13.15  | 10.28 | 1 |
| 10 | 8 -15 | 24.08  | 10.21 | 1 |
| 9  | 8 -15 | 2.07   | 7.83  | 1 |
| 8  | 8 -15 | -3.51  | 6.36  | 1 |
| 7  | 8 -15 | 369.50 | 27.41 | 1 |
| 6  | 8 -15 | 462.38 | 31.04 | 1 |
| 5  | 8 -15 | 0.69   | 5.60  | 1 |
| 4  | 8 -15 | 27.63  | 8.96  | 1 |
| 3  | 8 -15 | 247.17 | 20.20 | 1 |
| 2  | 8 -15 | 159.02 | 17.43 | 1 |
| 1  | 8 -15 | 61.22  | 11.46 | 1 |
| 0  | 8 -15 | 78.42  | 12.61 | 1 |
| -1 | 8 -15 | 137.53 | 15.50 | 1 |
| -2 | 8 -15 | 110.32 | 13.84 | 1 |
| -3 | 8 -15 | 26.85  | 9.28  | 2 |
| -4 | 8 -15 | 45.05  | 12.26 | 2 |
| -5 | 8 -15 | 17.06  | 9.76  | 2 |
| -6 | 8 -15 | 148.72 | 20.33 | 2 |
| -7 | 8 -15 | 18.22  | 9.29  | 2 |
| -8 | 8 -15 | 19.04  | 9.81  | 2 |
| 12 | 7 -15 | 159.55 | 20.86 | 1 |
| 11 | 7 -15 | 28.43  | 11.32 | 1 |
| 10 | 7 -15 | 64.62  | 14.10 | 1 |
| 9  | 7 -15 | 7.10   | 8.28  | 1 |
| 8  | 7 -15 | 31.29  | 11.28 | 1 |
| 7  | 7 -15 | 3.20   | 6.94  | 1 |
| 6  | 7 -15 | 11.59  | 7.97  | 1 |
| 5  | 7 -15 | 180.54 | 19.26 | 1 |
| 4  | 7 -15 | 44.28  | 10.33 | 1 |
| 3  | 7 -15 | 7.18   | 5.18  | 1 |
| 2  | 7 -15 | 0.35   | 4.82  | 1 |
| 1  | 7 -15 | 12.29  | 5.54  | 1 |
| 0  | 7 -15 | 287.46 | 20.93 | 1 |
| -1 | 7 -15 | 134.52 | 14.90 | 1 |
| -2 | 7 -15 | 72.15  | 11.68 | 1 |
| -3 | 7 -15 | 5.88   | 6.47  | 2 |



|     |    |     |        |       |   |
|-----|----|-----|--------|-------|---|
| -4  | 7  | -15 | 157.80 | 18.84 | 2 |
| -5  | 7  | -15 | 9.67   | 8.00  | 2 |
| -6  | 7  | -15 | 2.33   | 7.37  | 2 |
| -7  | 7  | -15 | 54.93  | 14.21 | 2 |
| -8  | 7  | -15 | -1.91  | 6.47  | 2 |
| -14 | -6 | 15  | 61.39  | 17.15 | 3 |
| 13  | 6  | -15 | 34.38  | 11.47 | 1 |
| -13 | -6 | 15  | 58.37  | 15.41 | 3 |
| -12 | -6 | 15  | 7.72   | 8.64  | 3 |
| 12  | 6  | -15 | 1.21   | 7.85  | 1 |
| -11 | -6 | 15  | -14.97 | 5.83  | 3 |
| 11  | 6  | -15 | 5.10   | 7.82  | 1 |
| 10  | 6  | -15 | 7.85   | 8.44  | 1 |
| -10 | -6 | 15  | 2.89   | 7.00  | 3 |
| -9  | -6 | 15  | 144.62 | 18.13 | 3 |
| 9   | 6  | -15 | 128.12 | 18.29 | 1 |
| 8   | 6  | -15 | 167.64 | 20.35 | 1 |
| -8  | -6 | 15  | 165.31 | 19.32 | 3 |
| -7  | -6 | 15  | 15.43  | 8.81  | 3 |
| 7   | 6  | -15 | 42.98  | 11.45 | 1 |
| 6   | 6  | -15 | 0.62   | 5.99  | 1 |
| 5   | 6  | -15 | 92.99  | 14.49 | 1 |
| 4   | 6  | -15 | -0.43  | 4.66  | 1 |
| 3   | 6  | -15 | 50.78  | 10.70 | 1 |
| 2   | 6  | -15 | 267.48 | 20.26 | 1 |
| 1   | 6  | -15 | 109.92 | 14.40 | 1 |
| 0   | 6  | -15 | 16.96  | 6.22  | 1 |
| -1  | 6  | -15 | 1.60   | 4.30  | 1 |
| -2  | 6  | -15 | 34.03  | 8.45  | 1 |
| -3  | 6  | -15 | 335.30 | 24.32 | 2 |
| -4  | 6  | -15 | 35.87  | 10.91 | 2 |
| -5  | 6  | -15 | 1.86   | 7.49  | 2 |
| -6  | 6  | -15 | -1.79  | 6.15  | 2 |
| -7  | 6  | -15 | 23.95  | 10.29 | 2 |
| -8  | 6  | -15 | 6.73   | 8.01  | 2 |
| -14 | -5 | 15  | 27.40  | 12.77 | 3 |
| 13  | 5  | -15 | 70.29  | 14.99 | 1 |
| -13 | -5 | 15  | 51.92  | 15.07 | 3 |
| -12 | -5 | 15  | 22.01  | 8.90  | 3 |
| 12  | 5  | -15 | -0.49  | 7.89  | 1 |
| 11  | 5  | -15 | -2.26  | 6.67  | 1 |
| -11 | -5 | 15  | -4.48  | 6.28  | 3 |
| -10 | -5 | 15  | 38.93  | 11.84 | 3 |
| 10  | 5  | -15 | 22.40  | 9.78  | 1 |
| -9  | -5 | 15  | 43.79  | 11.90 | 3 |
| 9   | 5  | -15 | 56.37  | 13.26 | 1 |

|     |    |     |        |       |   |
|-----|----|-----|--------|-------|---|
| -8  | -5 | 15  | 75.73  | 14.39 | 3 |
| 8   | 5  | -15 | 89.76  | 16.05 | 1 |
| -7  | -5 | 15  | 2.89   | 6.34  | 3 |
| 7   | 5  | -15 | -3.54  | 5.14  | 1 |
| 6   | 5  | -15 | 38.85  | 10.61 | 1 |
| 5   | 5  | -15 | 16.98  | 7.27  | 1 |
| 4   | 5  | -15 | 0.46   | 4.51  | 1 |
| 3   | 5  | -15 | 193.60 | 18.55 | 1 |
| 2   | 5  | -15 | 75.99  | 12.47 | 1 |
| 1   | 5  | -15 | -0.27  | 3.77  | 1 |
| 0   | 5  | -15 | 10.73  | 5.16  | 1 |
| -1  | 5  | -15 | 44.65  | 9.80  | 1 |
| -2  | 5  | -15 | 24.18  | 7.01  | 1 |
| -3  | 5  | -15 | 5.01   | 6.61  | 2 |
| -4  | 5  | -15 | 94.67  | 15.74 | 2 |
| -5  | 5  | -15 | 35.96  | 11.47 | 2 |
| -6  | 5  | -15 | 6.41   | 8.37  | 2 |
| -7  | 5  | -15 | 13.29  | 9.87  | 2 |
| -8  | 5  | -15 | 12.44  | 8.38  | 2 |
| -14 | -4 | 15  | 9.79   | 10.40 | 3 |
| 13  | 4  | -15 | 58.22  | 13.59 | 1 |
| -13 | -4 | 15  | 60.91  | 15.05 | 3 |
| -12 | -4 | 15  | 51.67  | 13.61 | 3 |
| 12  | 4  | -15 | 73.35  | 14.95 | 1 |
| 11  | 4  | -15 | 41.65  | 11.60 | 1 |
| -11 | -4 | 15  | 51.02  | 13.12 | 3 |
| 10  | 4  | -15 | -3.15  | 7.21  | 1 |
| -10 | -4 | 15  | 4.62   | 7.76  | 3 |
| -9  | -4 | 15  | 31.65  | 10.43 | 3 |
| 9   | 4  | -15 | 33.53  | 10.64 | 1 |
| -8  | -4 | 15  | 0.55   | 6.65  | 3 |
| 8   | 4  | -15 | -0.97  | 5.95  | 1 |
| -7  | -4 | 15  | -2.98  | 5.37  | 3 |
| 7   | 4  | -15 | -1.07  | 5.18  | 1 |
| 6   | 4  | -15 | 51.29  | 11.65 | 1 |
| 5   | 4  | -15 | 13.80  | 6.69  | 1 |
| 4   | 4  | -15 | 113.87 | 14.98 | 1 |
| 3   | 4  | -15 | 75.42  | 12.54 | 1 |
| 2   | 4  | -15 | 22.66  | 6.83  | 1 |
| 1   | 4  | -15 | 18.92  | 6.43  | 1 |
| 0   | 4  | -15 | 4.23   | 4.32  | 1 |
| -1  | 4  | -15 | 64.23  | 11.13 | 1 |
| -2  | 4  | -15 | 23.20  | 9.00  | 2 |
| -2  | 4  | -15 | 33.59  | 8.59  | 1 |
| -3  | 4  | -15 | 0.00   | 5.69  | 2 |
| -4  | 4  | -15 | -6.66  | 5.75  | 2 |

|     |    |     |        |       |   |
|-----|----|-----|--------|-------|---|
| -5  | 4  | -15 | 1.16   | 7.14  | 2 |
| -6  | 4  | -15 | 6.63   | 7.33  | 2 |
| -7  | 4  | -15 | 0.92   | 7.40  | 2 |
| -8  | 4  | -15 | 31.56  | 11.95 | 2 |
| -15 | -3 | 15  | 91.48  | 19.17 | 3 |
| -14 | -3 | 15  | 13.91  | 11.07 | 3 |
| -13 | -3 | 15  | 1.65   | 8.72  | 3 |
| 13  | 3  | -15 | -1.16  | 7.92  | 1 |
| -12 | -3 | 15  | 64.79  | 14.95 | 3 |
| 12  | 3  | -15 | 120.89 | 17.50 | 1 |
| 11  | 3  | -15 | 119.95 | 17.93 | 1 |
| -11 | -3 | 15  | 139.49 | 19.62 | 3 |
| -10 | -3 | 15  | 51.92  | 13.46 | 3 |
| 10  | 3  | -15 | 50.02  | 12.97 | 1 |
| -9  | -3 | 15  | 65.69  | 13.50 | 3 |
| 9   | 3  | -15 | 69.94  | 14.35 | 1 |
| -8  | -3 | 15  | 20.75  | 9.03  | 3 |
| 8   | 3  | -15 | 5.62   | 6.37  | 1 |
| -7  | -3 | 15  | 222.92 | 22.23 | 3 |
| 7   | 3  | -15 | 253.37 | 20.97 | 1 |
| 6   | 3  | -15 | 10.55  | 6.88  | 1 |
| 5   | 3  | -15 | 5.33   | 5.21  | 1 |
| 4   | 3  | -15 | 94.14  | 13.58 | 1 |
| 3   | 3  | -15 | 57.57  | 11.16 | 1 |
| 2   | 3  | -15 | 13.46  | 5.80  | 1 |
| 1   | 3  | -15 | 15.44  | 5.97  | 1 |
| 0   | 3  | -15 | 58.62  | 10.70 | 1 |
| -1  | 3  | -15 | 50.59  | 10.42 | 1 |
| -2  | 3  | -15 | 223.78 | 17.74 | 1 |
| -2  | 3  | -15 | 226.59 | 19.23 | 2 |
| -3  | 3  | -15 | 43.10  | 10.81 | 2 |
| -4  | 3  | -15 | 4.52   | 6.50  | 2 |
| -5  | 3  | -15 | 8.30   | 7.81  | 2 |
| -6  | 3  | -15 | 43.96  | 11.92 | 2 |
| -7  | 3  | -15 | 48.35  | 13.40 | 2 |
| -8  | 3  | -15 | 67.68  | 16.18 | 2 |
| -15 | -2 | 15  | -5.03  | 10.33 | 3 |
| -14 | -2 | 15  | 115.63 | 20.40 | 3 |
| -13 | -2 | 15  | 28.07  | 11.31 | 3 |
| 13  | 2  | -15 | 50.09  | 13.46 | 1 |
| 12  | 2  | -15 | 66.65  | 14.18 | 1 |
| -12 | -2 | 15  | 71.08  | 15.22 | 3 |
| -11 | -2 | 15  | 6.88   | 8.19  | 3 |
| 11  | 2  | -15 | 20.41  | 10.22 | 1 |
| 10  | 2  | -15 | -3.76  | 6.25  | 1 |
| -10 | -2 | 15  | -3.69  | 5.50  | 3 |

|     |    |     |        |       |   |
|-----|----|-----|--------|-------|---|
| 9   | 2  | -15 | 104.26 | 16.44 | 1 |
| -9  | -2 | 15  | 113.11 | 17.26 | 3 |
| -8  | -2 | 15  | 17.01  | 9.24  | 3 |
| 8   | 2  | -15 | 20.48  | 8.62  | 1 |
| 7   | 2  | -15 | -5.65  | 4.65  | 1 |
| 6   | 2  | -15 | 48.34  | 11.25 | 1 |
| 5   | 2  | -15 | 83.20  | 13.63 | 1 |
| 4   | 2  | -15 | 0.35   | 4.36  | 1 |
| 3   | 2  | -15 | 135.98 | 16.03 | 1 |
| 2   | 2  | -15 | 22.32  | 7.51  | 1 |
| 1   | 2  | -15 | 13.57  | 5.58  | 1 |
| 0   | 2  | -15 | 114.08 | 14.18 | 1 |
| -1  | 2  | -15 | 159.90 | 16.37 | 1 |
| -2  | 2  | -15 | 7.19   | 5.29  | 1 |
| -2  | 2  | -15 | 10.46  | 6.98  | 2 |
| -3  | 2  | -15 | 2.37   | 6.98  | 2 |
| -4  | 2  | -15 | -3.38  | 6.49  | 2 |
| -5  | 2  | -15 | 2.70   | 8.05  | 2 |
| -6  | 2  | -15 | 9.96   | 8.70  | 2 |
| -7  | 2  | -15 | 28.23  | 11.94 | 2 |
| -15 | -1 | 15  | 48.16  | 14.92 | 3 |
| -14 | -1 | 15  | 142.68 | 21.66 | 3 |
| -13 | -1 | 15  | 0.58   | 6.76  | 3 |
| 13  | 1  | -15 | 3.57   | 8.24  | 1 |
| -12 | -1 | 15  | 0.41   | 5.60  | 3 |
| 12  | 1  | -15 | -2.73  | 6.66  | 1 |
| 11  | 1  | -15 | 182.66 | 20.55 | 1 |
| -11 | -1 | 15  | 164.64 | 21.37 | 3 |
| 10  | 1  | -15 | -2.60  | 6.31  | 1 |
| -10 | -1 | 15  | -11.38 | 4.88  | 3 |
| 9   | 1  | -15 | 315.33 | 24.22 | 1 |
| -9  | -1 | 15  | 359.41 | 27.83 | 3 |
| 8   | 1  | -15 | 248.09 | 21.11 | 1 |
| -8  | -1 | 15  | 201.12 | 22.31 | 3 |
| 7   | 1  | -15 | 45.18  | 11.87 | 1 |
| 6   | 1  | -15 | 14.04  | 7.45  | 1 |
| 5   | 1  | -15 | 162.45 | 17.83 | 1 |
| 4   | 1  | -15 | 245.51 | 19.19 | 1 |
| 3   | 1  | -15 | 16.05  | 6.72  | 1 |
| 2   | 1  | -15 | 247.93 | 19.18 | 1 |
| 1   | 1  | -15 | 299.55 | 21.23 | 1 |
| 0   | 1  | -15 | 46.97  | 10.27 | 1 |
| -1  | 1  | -15 | 77.94  | 12.34 | 1 |
| -2  | 1  | -15 | -4.52  | 4.58  | 1 |
| -2  | 1  | -15 | -8.19  | 4.99  | 2 |
| -3  | 1  | -15 | 17.50  | 8.37  | 2 |

|     |    |     |        |       |   |
|-----|----|-----|--------|-------|---|
| -4  | 1  | -15 | 31.58  | 10.94 | 2 |
| -5  | 1  | -15 | -7.04  | 7.65  | 2 |
| -6  | 1  | -15 | -8.61  | 6.94  | 2 |
| -7  | 1  | -15 | 22.73  | 11.12 | 2 |
| -15 | 0  | 15  | 77.33  | 18.54 | 3 |
| -14 | 0  | 15  | 21.36  | 10.89 | 3 |
| -13 | 0  | 15  | 63.69  | 15.51 | 3 |
| 13  | 0  | -15 | 124.90 | 17.69 | 1 |
| -12 | 0  | 15  | 13.30  | 7.84  | 3 |
| 12  | 0  | -15 | 2.82   | 7.59  | 1 |
| -11 | 0  | 15  | 195.08 | 22.81 | 3 |
| 11  | 0  | -15 | 199.97 | 21.26 | 1 |
| 10  | 0  | -15 | 20.38  | 10.04 | 1 |
| -10 | 0  | 15  | 17.86  | 8.56  | 3 |
| 9   | 0  | -15 | 19.06  | 9.71  | 1 |
| -9  | 0  | 15  | 32.39  | 10.91 | 3 |
| -8  | 0  | 15  | 382.23 | 28.87 | 3 |
| 8   | 0  | -15 | 397.89 | 27.26 | 1 |
| 7   | 0  | -15 | 682.33 | 36.82 | 1 |
| 6   | 0  | -15 | 39.88  | 10.72 | 1 |
| 5   | 0  | -15 | 0.03   | 4.94  | 1 |
| 4   | 0  | -15 | 18.78  | 7.54  | 1 |
| 3   | 0  | -15 | 17.26  | 6.35  | 1 |
| 2   | 0  | -15 | 223.65 | 18.17 | 1 |
| 1   | 0  | -15 | 115.25 | 14.78 | 1 |
| 0   | 0  | -15 | 3.23   | 4.92  | 1 |
| -1  | 0  | -15 | 44.23  | 9.75  | 1 |
| -2  | 0  | -15 | 72.93  | 13.64 | 2 |
| -2  | 0  | -15 | 73.58  | 12.55 | 1 |
| -3  | 0  | -15 | -5.42  | 6.70  | 2 |
| -4  | 0  | -15 | 0.55   | 7.43  | 2 |
| -5  | 0  | -15 | 184.57 | 22.78 | 2 |
| -6  | 0  | -15 | 12.08  | 9.88  | 2 |
| -7  | 0  | -15 | 14.25  | 10.61 | 2 |
| -15 | 1  | 15  | 5.00   | 10.18 | 3 |
| -14 | 1  | 15  | 61.61  | 15.61 | 3 |
| 13  | -1 | -15 | 170.50 | 20.06 | 1 |
| -13 | 1  | 15  | 138.18 | 21.37 | 3 |
| 12  | -1 | -15 | 6.62   | 7.99  | 1 |
| -12 | 1  | 15  | 7.67   | 8.63  | 3 |
| 11  | -1 | -15 | 233.46 | 22.86 | 1 |
| -11 | 1  | 15  | 219.20 | 24.22 | 3 |
| 10  | -1 | -15 | 2.79   | 8.32  | 1 |
| -10 | 1  | 15  | 0.48   | 7.42  | 3 |
| -9  | 1  | 15  | 1.87   | 7.00  | 3 |
| 9   | -1 | -15 | 4.30   | 7.37  | 1 |

|     |    |     |        |       |   |
|-----|----|-----|--------|-------|---|
| 8   | -1 | -15 | 50.00  | 12.58 | 1 |
| 7   | -1 | -15 | 105.85 | 16.57 | 1 |
| 6   | -1 | -15 | 89.75  | 15.15 | 1 |
| 5   | -1 | -15 | 4.85   | 4.51  | 1 |
| 4   | -1 | -15 | 94.44  | 14.55 | 1 |
| 3   | -1 | -15 | 42.95  | 9.87  | 1 |
| 2   | -1 | -15 | -0.05  | 4.63  | 1 |
| 1   | -1 | -15 | 198.08 | 17.20 | 1 |
| 0   | -1 | -15 | 126.34 | 15.33 | 1 |
| -1  | -1 | -15 | 136.99 | 16.00 | 1 |
| -2  | -1 | -15 | -2.70  | 5.52  | 2 |
| -2  | -1 | -15 | -0.93  | 4.88  | 1 |
| -3  | -1 | -15 | 24.25  | 10.82 | 2 |
| -4  | -1 | -15 | 0.58   | 7.33  | 2 |
| -5  | -1 | -15 | 38.30  | 13.30 | 2 |
| -6  | -1 | -15 | 74.77  | 17.34 | 2 |
| -15 | 2  | 15  | 33.24  | 13.93 | 3 |
| -14 | 2  | 15  | 16.89  | 10.55 | 3 |
| -13 | 2  | 15  | 61.86  | 14.67 | 3 |
| 13  | -2 | -15 | 60.23  | 13.20 | 1 |
| -12 | 2  | 15  | 12.02  | 9.14  | 3 |
| 12  | -2 | -15 | 6.58   | 9.28  | 1 |
| -11 | 2  | 15  | 35.39  | 11.31 | 3 |
| 11  | -2 | -15 | 57.90  | 13.36 | 1 |
| 10  | -2 | -15 | 414.92 | 28.91 | 1 |
| -10 | 2  | 15  | 427.00 | 32.17 | 3 |
| 9   | -2 | -15 | 221.76 | 22.60 | 1 |
| -9  | 2  | 15  | 180.67 | 22.56 | 3 |
| 8   | -2 | -15 | 1.36   | 6.98  | 1 |
| 7   | -2 | -15 | 70.49  | 14.33 | 1 |
| 6   | -2 | -15 | 34.22  | 10.88 | 1 |
| 5   | -2 | -15 | 64.10  | 12.15 | 1 |
| 4   | -2 | -15 | 19.30  | 6.86  | 1 |
| 3   | -2 | -15 | 170.66 | 18.03 | 1 |
| 2   | -2 | -15 | 5.33   | 5.55  | 1 |
| 1   | -2 | -15 | 140.65 | 16.97 | 1 |
| 0   | -2 | -15 | 10.83  | 6.48  | 1 |
| -1  | -2 | -15 | 8.14   | 7.19  | 2 |
| -1  | -2 | -15 | 10.35  | 7.22  | 1 |
| -2  | -2 | -15 | 285.79 | 21.44 | 1 |
| -2  | -2 | -15 | 223.27 | 23.40 | 2 |
| -3  | -2 | -15 | 94.56  | 17.04 | 2 |
| -4  | -2 | -15 | 16.44  | 10.44 | 2 |
| -5  | -2 | -15 | 15.32  | 10.03 | 2 |
| -6  | -2 | -15 | 56.00  | 15.26 | 2 |
| -15 | 3  | 15  | 17.58  | 11.31 | 3 |

|     |    |     |        |       |   |
|-----|----|-----|--------|-------|---|
| -14 | 3  | 15  | 43.47  | 14.14 | 3 |
| 13  | -3 | -15 | 62.47  | 14.60 | 1 |
| -13 | 3  | 15  | 50.29  | 14.39 | 3 |
| -12 | 3  | 15  | 61.31  | 14.81 | 3 |
| 12  | -3 | -15 | 55.10  | 13.55 | 1 |
| -11 | 3  | 15  | -3.60  | 7.10  | 3 |
| 11  | -3 | -15 | -6.29  | 7.35  | 1 |
| 10  | -3 | -15 | -0.22  | 7.39  | 1 |
| -10 | 3  | 15  | -0.31  | 7.01  | 3 |
| 9   | -3 | -15 | 41.50  | 12.22 | 1 |
| 8   | -3 | -15 | -1.00  | 7.42  | 1 |
| 7   | -3 | -15 | 206.84 | 21.50 | 1 |
| 6   | -3 | -15 | 10.25  | 8.07  | 1 |
| 5   | -3 | -15 | -2.15  | 5.85  | 1 |
| 4   | -3 | -15 | 116.79 | 16.18 | 1 |
| 3   | -3 | -15 | 114.19 | 16.38 | 1 |
| 2   | -3 | -15 | 13.20  | 7.18  | 1 |
| 1   | -3 | -15 | 359.23 | 25.33 | 1 |
| 0   | -3 | -15 | 7.78   | 6.34  | 1 |
| -1  | -3 | -15 | 86.93  | 15.59 | 2 |
| -1  | -3 | -15 | 57.84  | 12.25 | 1 |
| -2  | -3 | -15 | 71.74  | 15.37 | 2 |
| -3  | -3 | -15 | 18.57  | 10.40 | 2 |
| -4  | -3 | -15 | 138.10 | 21.63 | 2 |
| -5  | -3 | -15 | -4.92  | 7.04  | 2 |
| -15 | 4  | 15  | 7.39   | 6.52  | 3 |
| -14 | 4  | 15  | 0.65   | 8.16  | 3 |
| 13  | -4 | -15 | 4.85   | 8.52  | 1 |
| -13 | 4  | 15  | 12.12  | 9.72  | 3 |
| 12  | -4 | -15 | 226.86 | 23.28 | 1 |
| -12 | 4  | 15  | 236.09 | 27.34 | 3 |
| 11  | -4 | -15 | 5.54   | 8.48  | 1 |
| -11 | 4  | 15  | -7.81  | 8.29  | 3 |
| 10  | -4 | -15 | 0.61   | 7.69  | 1 |
| -10 | 4  | 15  | 4.01   | 8.64  | 3 |
| 9   | -4 | -15 | 71.67  | 15.57 | 1 |
| 8   | -4 | -15 | 4.67   | 7.41  | 1 |
| 7   | -4 | -15 | 96.73  | 16.63 | 1 |
| 6   | -4 | -15 | 0.03   | 7.34  | 1 |
| 5   | -4 | -15 | 23.92  | 8.54  | 1 |
| 4   | -4 | -15 | 22.53  | 8.73  | 1 |
| 3   | -4 | -15 | 44.91  | 10.36 | 1 |
| 2   | -4 | -15 | 9.34   | 6.51  | 1 |
| 1   | -4 | -15 | 28.74  | 8.56  | 1 |
| 0   | -4 | -15 | 391.71 | 26.65 | 1 |
| -1  | -4 | -15 | 99.98  | 14.71 | 1 |

|     |    |     |        |       |   |
|-----|----|-----|--------|-------|---|
| -1  | -4 | -15 | 96.64  | 17.51 | 2 |
| -2  | -4 | -15 | 8.09   | 8.50  | 2 |
| -3  | -4 | -15 | 7.96   | 9.21  | 2 |
| -4  | -4 | -15 | 17.93  | 10.24 | 2 |
| -15 | 5  | 15  | -0.08  | 6.58  | 3 |
| -14 | 5  | 15  | 7.70   | 7.26  | 3 |
| 13  | -5 | -15 | -1.21  | 7.41  | 1 |
| -13 | 5  | 15  | -2.28  | 8.30  | 3 |
| -12 | 5  | 15  | 8.70   | 10.05 | 3 |
| 12  | -5 | -15 | 9.87   | 9.03  | 1 |
| 11  | -5 | -15 | 117.84 | 18.16 | 1 |
| -11 | 5  | 15  | 62.16  | 16.19 | 3 |
| 10  | -5 | -15 | 17.71  | 10.07 | 1 |
| 9   | -5 | -15 | 337.45 | 27.07 | 1 |
| 8   | -5 | -15 | 36.95  | 12.57 | 1 |
| 7   | -5 | -15 | 0.94   | 7.85  | 1 |
| 6   | -5 | -15 | 57.50  | 13.80 | 1 |
| 5   | -5 | -15 | 42.32  | 10.80 | 1 |
| 4   | -5 | -15 | 25.08  | 8.98  | 1 |
| 3   | -5 | -15 | 44.56  | 11.01 | 1 |
| 2   | -5 | -15 | 24.70  | 8.21  | 1 |
| 1   | -5 | -15 | -5.06  | 5.12  | 1 |
| 0   | -5 | -15 | -0.24  | 5.35  | 1 |
| -1  | -5 | -15 | -3.52  | 7.88  | 2 |
| -1  | -5 | -15 | 1.53   | 6.34  | 1 |
| -2  | -5 | -15 | 2.07   | 7.86  | 2 |
| -3  | -5 | -15 | 10.54  | 9.54  | 2 |
| -14 | 6  | 15  | -9.58  | 6.07  | 3 |
| 13  | -6 | -15 | -1.79  | 7.75  | 1 |
| -13 | 6  | 15  | 0.83   | 8.45  | 3 |
| -12 | 6  | 15  | 17.83  | 11.42 | 3 |
| 12  | -6 | -15 | 5.78   | 8.90  | 1 |
| 11  | -6 | -15 | 2.28   | 7.93  | 1 |
| 10  | -6 | -15 | 175.08 | 21.47 | 1 |
| 9   | -6 | -15 | 3.67   | 8.17  | 1 |
| 8   | -6 | -15 | 25.93  | 11.15 | 1 |
| 7   | -6 | -15 | 11.78  | 9.06  | 1 |
| 6   | -6 | -15 | 12.12  | 8.24  | 1 |
| 5   | -6 | -15 | -6.09  | 5.64  | 1 |
| 4   | -6 | -15 | 11.93  | 8.09  | 1 |
| 3   | -6 | -15 | 146.69 | 18.64 | 1 |
| 2   | -6 | -15 | 306.50 | 24.01 | 1 |
| 1   | -6 | -15 | 72.12  | 13.70 | 1 |
| 0   | -6 | -15 | -4.40  | 5.93  | 1 |
| -1  | -6 | -15 | 14.99  | 8.22  | 1 |
| -1  | -6 | -15 | 8.92   | 9.45  | 2 |



|     |    |     |        |       |   |
|-----|----|-----|--------|-------|---|
| -2  | -6 | -15 | 4.04   | 9.46  | 2 |
| -3  | -6 | -15 | 58.61  | 15.89 | 2 |
| -14 | 7  | 15  | -1.80  | 6.75  | 3 |
| -13 | 7  | 15  | 3.27   | 9.08  | 3 |
| 13  | -7 | -15 | 10.09  | 8.47  | 1 |
| 12  | -7 | -15 | 30.37  | 11.30 | 1 |
| 11  | -7 | -15 | 78.69  | 16.29 | 1 |
| 10  | -7 | -15 | 101.78 | 17.19 | 1 |
| 9   | -7 | -15 | 102.76 | 17.80 | 1 |
| 8   | -7 | -15 | 102.73 | 17.91 | 1 |
| 7   | -7 | -15 | 56.15  | 14.35 | 1 |
| 6   | -7 | -15 | -4.69  | 6.79  | 1 |
| 5   | -7 | -15 | 1.41   | 6.65  | 1 |
| 4   | -7 | -15 | 24.90  | 9.57  | 1 |
| 3   | -7 | -15 | 12.20  | 7.68  | 1 |
| 2   | -7 | -15 | 4.03   | 6.86  | 1 |
| 1   | -7 | -15 | 39.18  | 12.00 | 1 |
| 0   | -7 | -15 | 11.39  | 8.42  | 1 |
| -1  | -7 | -15 | 23.31  | 10.69 | 2 |
| -1  | -7 | -15 | 40.24  | 11.65 | 1 |
| -2  | -7 | -15 | 6.39   | 9.06  | 2 |
| 13  | -8 | -15 | 31.87  | 12.17 | 1 |
| -13 | 8  | 15  | -4.15  | 7.28  | 3 |
| 12  | -8 | -15 | -9.85  | 8.26  | 1 |
| 11  | -8 | -15 | 5.01   | 9.97  | 1 |
| 10  | -8 | -15 | 29.75  | 12.63 | 1 |
| 8   | -8 | -15 | 4.79   | 8.57  | 1 |
| 7   | -8 | -15 | 10.30  | 9.06  | 1 |
| 6   | -8 | -15 | -0.79  | 6.72  | 1 |
| 5   | -8 | -15 | 14.12  | 8.99  | 1 |
| 4   | -8 | -15 | 0.52   | 7.42  | 1 |
| 3   | -8 | -15 | 28.56  | 10.68 | 1 |
| 2   | -8 | -15 | 37.64  | 11.87 | 1 |
| 1   | -8 | -15 | 10.84  | 8.81  | 1 |
| 0   | -8 | -15 | -7.40  | 7.34  | 1 |
| -1  | -8 | -15 | 15.23  | 10.28 | 1 |
| 12  | -9 | -15 | 130.49 | 19.98 | 1 |
| 11  | -9 | -15 | 68.59  | 15.92 | 1 |
| 10  | -9 | -15 | 13.36  | 9.59  | 1 |
| 9   | -9 | -15 | 9.54   | 8.45  | 1 |
| 8   | -9 | -15 | 4.25   | 8.26  | 1 |
| 7   | -9 | -15 | 18.04  | 8.98  | 1 |
| 6   | -9 | -15 | -6.62  | 7.01  | 1 |
| 5   | -9 | -15 | 40.12  | 12.47 | 1 |
| 4   | -9 | -15 | 31.08  | 11.51 | 1 |
| 3   | -9 | -15 | 7.43   | 8.24  | 1 |

|    |     |     |        |       |   |
|----|-----|-----|--------|-------|---|
| 2  | -9  | -15 | 2.16   | 9.26  | 1 |
| 1  | -9  | -15 | 37.76  | 12.43 | 1 |
| 11 | -10 | -15 | 59.62  | 14.95 | 1 |
| 10 | -10 | -15 | -1.70  | 6.85  | 1 |
| 9  | -10 | -15 | -0.78  | 6.98  | 1 |
| 8  | -10 | -15 | -9.73  | 5.79  | 1 |
| 7  | -10 | -15 | 4.35   | 7.08  | 1 |
| 6  | -10 | -15 | 30.17  | 12.75 | 1 |
| 5  | -10 | -15 | 42.92  | 13.50 | 1 |
| 4  | -10 | -15 | 0.73   | 9.89  | 1 |
| 3  | -10 | -15 | -3.22  | 9.04  | 1 |
| 9  | -11 | -15 | 2.68   | 6.75  | 1 |
| 8  | -11 | -15 | 11.40  | 7.35  | 1 |
| 7  | -11 | -15 | -1.01  | 6.63  | 1 |
| 3  | 16  | -16 | 8.09   | 8.06  | 1 |
| 2  | 16  | -16 | 10.55  | 9.55  | 1 |
| 1  | 16  | -16 | 47.34  | 12.57 | 1 |
| 0  | 16  | -16 | -1.35  | 6.63  | 1 |
| -1 | 16  | -16 | 48.31  | 11.73 | 1 |
| -2 | 16  | -16 | 79.77  | 15.69 | 1 |
| 5  | 15  | -16 | 91.51  | 17.32 | 1 |
| 4  | 15  | -16 | 48.17  | 13.49 | 1 |
| 3  | 15  | -16 | 16.89  | 9.35  | 1 |
| 2  | 15  | -16 | 6.87   | 7.90  | 1 |
| 1  | 15  | -16 | 10.49  | 8.08  | 1 |
| 0  | 15  | -16 | 8.55   | 7.06  | 1 |
| -1 | 15  | -16 | -2.77  | 5.73  | 1 |
| -2 | 15  | -16 | 84.64  | 14.34 | 1 |
| 7  | 14  | -16 | -8.20  | 5.83  | 1 |
| 6  | 14  | -16 | 4.56   | 7.14  | 1 |
| 5  | 14  | -16 | -12.04 | 5.83  | 1 |
| 4  | 14  | -16 | 77.14  | 15.91 | 1 |
| 3  | 14  | -16 | 33.63  | 12.03 | 1 |
| 2  | 14  | -16 | 3.74   | 6.47  | 1 |
| 1  | 14  | -16 | 20.91  | 8.70  | 1 |
| 0  | 14  | -16 | 14.12  | 7.51  | 1 |
| -1 | 14  | -16 | 75.78  | 13.78 | 1 |
| -2 | 14  | -16 | 45.94  | 11.59 | 1 |
| 8  | 13  | -16 | 8.54   | 7.03  | 1 |
| 7  | 13  | -16 | -0.71  | 6.32  | 1 |
| 6  | 13  | -16 | 1.62   | 7.81  | 1 |
| 5  | 13  | -16 | 21.15  | 9.79  | 1 |
| 4  | 13  | -16 | -0.61  | 6.12  | 1 |
| 3  | 13  | -16 | 1.76   | 5.97  | 1 |
| 2  | 13  | -16 | -6.80  | 5.04  | 1 |
| 1  | 13  | -16 | 11.74  | 6.94  | 1 |

|    |    |     |        |       |   |
|----|----|-----|--------|-------|---|
| 0  | 13 | -16 | 16.31  | 7.75  | 1 |
| -1 | 13 | -16 | 82.13  | 14.06 | 1 |
| -2 | 13 | -16 | -7.56  | 4.71  | 1 |
| -6 | 13 | -16 | 40.02  | 14.33 | 2 |
| 9  | 12 | -16 | -12.46 | 5.58  | 1 |
| 8  | 12 | -16 | -6.23  | 6.73  | 1 |
| 6  | 12 | -16 | -6.08  | 6.48  | 1 |
| 5  | 12 | -16 | 2.65   | 7.39  | 1 |
| 4  | 12 | -16 | 26.11  | 8.87  | 1 |
| 3  | 12 | -16 | 3.07   | 5.34  | 1 |
| 2  | 12 | -16 | 25.92  | 9.03  | 1 |
| 1  | 12 | -16 | 38.04  | 9.51  | 1 |
| 0  | 12 | -16 | -1.26  | 5.02  | 1 |
| -1 | 12 | -16 | 12.67  | 7.00  | 1 |
| -2 | 12 | -16 | 3.80   | 6.49  | 1 |
| -6 | 12 | -16 | 54.75  | 14.08 | 2 |
| 10 | 11 | -16 | 16.80  | 9.47  | 1 |
| 9  | 11 | -16 | -0.42  | 7.02  | 1 |
| 8  | 11 | -16 | 62.23  | 14.69 | 1 |
| 7  | 11 | -16 | 111.54 | 19.16 | 1 |
| 6  | 11 | -16 | -11.97 | 6.49  | 1 |
| 5  | 11 | -16 | 5.77   | 6.82  | 1 |
| 4  | 11 | -16 | 199.60 | 21.61 | 1 |
| 3  | 11 | -16 | 101.49 | 16.11 | 1 |
| 2  | 11 | -16 | -11.56 | 4.22  | 1 |
| 1  | 11 | -16 | 89.80  | 14.82 | 1 |
| 0  | 11 | -16 | 127.38 | 16.73 | 1 |
| -1 | 11 | -16 | -3.56  | 5.16  | 1 |
| -2 | 11 | -16 | 1.79   | 5.20  | 1 |
| -5 | 11 | -16 | 75.85  | 15.55 | 2 |
| -6 | 11 | -16 | -6.21  | 7.33  | 2 |
| -7 | 11 | -16 | -3.06  | 8.56  | 2 |
| 11 | 10 | -16 | 19.99  | 10.08 | 1 |
| 10 | 10 | -16 | 229.04 | 25.57 | 1 |
| 9  | 10 | -16 | 257.91 | 26.50 | 1 |
| 8  | 10 | -16 | -3.41  | 7.70  | 1 |
| 7  | 10 | -16 | 16.50  | 8.50  | 1 |
| 6  | 10 | -16 | 223.29 | 23.94 | 1 |
| 5  | 10 | -16 | 8.80   | 6.63  | 1 |
| 4  | 10 | -16 | 228.21 | 22.69 | 1 |
| 3  | 10 | -16 | 19.26  | 8.87  | 1 |
| 2  | 10 | -16 | 44.20  | 11.18 | 1 |
| 1  | 10 | -16 | 9.15   | 6.61  | 1 |
| 0  | 10 | -16 | 2.56   | 5.43  | 1 |
| -1 | 10 | -16 | 0.18   | 5.70  | 1 |
| -2 | 10 | -16 | 36.78  | 9.29  | 1 |

|    |    |     |        |       |   |
|----|----|-----|--------|-------|---|
| -5 | 10 | -16 | 3.65   | 7.42  | 2 |
| -6 | 10 | -16 | 12.28  | 9.72  | 2 |
| -7 | 10 | -16 | 10.13  | 8.78  | 2 |
| 12 | 9  | -16 | 12.29  | 9.37  | 1 |
| 11 | 9  | -16 | -12.37 | 7.30  | 1 |
| 10 | 9  | -16 | 41.16  | 12.53 | 1 |
| 9  | 9  | -16 | 10.13  | 8.53  | 1 |
| 8  | 9  | -16 | 47.55  | 13.91 | 1 |
| 7  | 9  | -16 | 16.00  | 9.94  | 1 |
| 6  | 9  | -16 | 90.31  | 16.43 | 1 |
| 5  | 9  | -16 | 1.72   | 6.35  | 1 |
| 4  | 9  | -16 | 39.12  | 10.54 | 1 |
| 3  | 9  | -16 | 341.90 | 25.27 | 1 |
| 2  | 9  | -16 | 32.66  | 9.19  | 1 |
| 1  | 9  | -16 | 6.13   | 5.65  | 1 |
| 0  | 9  | -16 | 6.16   | 4.83  | 1 |
| -1 | 9  | -16 | 5.42   | 5.74  | 1 |
| -2 | 9  | -16 | 116.04 | 14.82 | 1 |
| -5 | 9  | -16 | 6.50   | 8.34  | 2 |
| -6 | 9  | -16 | 19.45  | 9.96  | 2 |
| -7 | 9  | -16 | 1.38   | 8.15  | 2 |
| 12 | 8  | -16 | 101.09 | 18.81 | 1 |
| 11 | 8  | -16 | 89.88  | 17.09 | 1 |
| 10 | 8  | -16 | 59.48  | 14.22 | 1 |
| 9  | 8  | -16 | 50.22  | 12.96 | 1 |
| 8  | 8  | -16 | -6.10  | 7.01  | 1 |
| 7  | 8  | -16 | 33.39  | 12.30 | 1 |
| 6  | 8  | -16 | 42.87  | 12.46 | 1 |
| 5  | 8  | -16 | 262.01 | 22.30 | 1 |
| 4  | 8  | -16 | 0.16   | 5.02  | 1 |
| 3  | 8  | -16 | 24.72  | 8.27  | 1 |
| 2  | 8  | -16 | 33.63  | 9.55  | 1 |
| 1  | 8  | -16 | 62.00  | 11.90 | 1 |
| 0  | 8  | -16 | 366.36 | 24.66 | 1 |
| -1 | 8  | -16 | 232.57 | 18.79 | 1 |
| -2 | 8  | -16 | 21.26  | 7.49  | 1 |
| -5 | 8  | -16 | 7.47   | 8.15  | 2 |
| -6 | 8  | -16 | 48.99  | 13.22 | 2 |
| -7 | 8  | -16 | -1.48  | 7.45  | 2 |
| 13 | 7  | -16 | -2.16  | 8.04  | 1 |
| 12 | 7  | -16 | 68.63  | 14.94 | 1 |
| 11 | 7  | -16 | 95.99  | 17.85 | 1 |
| 10 | 7  | -16 | 34.21  | 11.55 | 1 |
| 9  | 7  | -16 | 10.01  | 8.99  | 1 |
| 8  | 7  | -16 | 25.86  | 9.94  | 1 |
| 7  | 7  | -16 | 9.68   | 8.60  | 1 |

|     |       |        |       |   |
|-----|-------|--------|-------|---|
| 6   | 7-16  | 122.07 | 18.09 | 1 |
| 5   | 7-16  | 524.78 | 32.05 | 1 |
| 4   | 7-16  | 95.37  | 15.46 | 1 |
| 3   | 7-16  | 90.18  | 14.72 | 1 |
| 2   | 7-16  | 72.54  | 13.19 | 1 |
| 1   | 7-16  | 23.07  | 8.39  | 1 |
| 0   | 7-16  | 390.51 | 25.40 | 1 |
| -1  | 7-16  | 7.03   | 5.37  | 1 |
| -2  | 7-16  | 149.69 | 16.36 | 1 |
| -4  | 7-16  | 105.22 | 17.13 | 2 |
| -5  | 7-16  | 2.05   | 7.00  | 2 |
| -6  | 7-16  | 9.83   | 8.28  | 2 |
| -7  | 7-16  | 80.62  | 17.15 | 2 |
| -13 | -6 16 | 0.89   | 9.75  | 3 |
| 13  | 6-16  | 12.00  | 10.60 | 1 |
| 12  | 6-16  | 9.85   | 9.34  | 1 |
| -12 | -6 16 | 14.71  | 10.74 | 3 |
| -11 | -6 16 | 164.87 | 21.42 | 3 |
| 11  | 6-16  | 140.93 | 20.14 | 1 |
| -10 | -6 16 | 46.80  | 12.83 | 3 |
| 10  | 6-16  | 65.32  | 15.10 | 1 |
| -9  | -6 16 | 136.46 | 18.96 | 3 |
| 9   | 6-16  | 180.95 | 21.94 | 1 |
| -8  | -6 16 | 2.92   | 7.69  | 3 |
| 8   | 6-16  | -1.49  | 6.80  | 1 |
| 7   | 6-16  | 162.88 | 20.56 | 1 |
| 6   | 6-16  | 19.08  | 9.86  | 1 |
| 5   | 6-16  | 12.60  | 6.81  | 1 |
| 4   | 6-16  | 155.16 | 18.28 | 1 |
| 3   | 6-16  | 0.83   | 5.27  | 1 |
| 2   | 6-16  | 676.21 | 35.63 | 1 |
| 1   | 6-16  | 303.44 | 21.95 | 1 |
| 0   | 6-16  | 13.94  | 6.00  | 1 |
| -1  | 6-16  | 122.95 | 15.25 | 1 |
| -2  | 6-16  | 268.28 | 20.14 | 1 |
| -4  | 6-16  | 28.91  | 10.52 | 2 |
| -5  | 6-16  | 33.01  | 11.68 | 2 |
| -6  | 6-16  | 7.12   | 8.40  | 2 |
| -7  | 6-16  | 35.32  | 12.10 | 2 |
| -14 | -5 16 | 26.56  | 12.99 | 3 |
| -13 | -5 16 | 9.95   | 9.95  | 3 |
| 13  | 5-16  | 15.86  | 10.28 | 1 |
| -12 | -5 16 | 10.42  | 8.73  | 3 |
| 12  | 5-16  | 0.02   | 8.23  | 1 |
| -11 | -5 16 | 3.92   | 8.37  | 3 |
| 11  | 5-16  | 44.93  | 12.95 | 1 |

|     |    |     |        |       |   |
|-----|----|-----|--------|-------|---|
| 10  | 5  | -16 | -2.34  | 7.91  | 1 |
| -10 | -5 | 16  | -4.00  | 7.03  | 3 |
| 9   | 5  | -16 | 16.89  | 9.41  | 1 |
| -9  | -5 | 16  | 11.61  | 8.16  | 3 |
| 8   | 5  | -16 | 75.75  | 15.18 | 1 |
| -8  | -5 | 16  | 80.52  | 15.23 | 3 |
| 7   | 5  | -16 | 213.96 | 22.09 | 1 |
| 6   | 5  | -16 | 3.68   | 6.59  | 1 |
| 5   | 5  | -16 | 7.07   | 6.64  | 1 |
| 4   | 5  | -16 | 173.76 | 18.91 | 1 |
| 3   | 5  | -16 | -0.85  | 4.11  | 1 |
| 2   | 5  | -16 | 141.92 | 16.38 | 1 |
| 1   | 5  | -16 | 9.88   | 6.01  | 1 |
| 0   | 5  | -16 | 118.39 | 14.88 | 1 |
| -1  | 5  | -16 | 68.25  | 11.94 | 1 |
| -2  | 5  | -16 | 1.23   | 4.43  | 1 |
| -4  | 5  | -16 | 41.50  | 11.89 | 2 |
| -5  | 5  | -16 | 52.05  | 13.71 | 2 |
| -6  | 5  | -16 | 71.20  | 15.47 | 2 |
| -7  | 5  | -16 | -3.68  | 7.36  | 2 |
| -14 | -4 | 16  | 30.91  | 12.97 | 3 |
| -13 | -4 | 16  | 54.20  | 14.74 | 3 |
| 13  | 4  | -16 | 60.49  | 14.52 | 1 |
| 12  | 4  | -16 | 9.92   | 8.65  | 1 |
| -12 | -4 | 16  | 3.69   | 7.30  | 3 |
| 11  | 4  | -16 | 16.55  | 8.48  | 1 |
| -11 | -4 | 16  | 28.82  | 11.50 | 3 |
| 10  | 4  | -16 | 28.22  | 10.62 | 1 |
| -10 | -4 | 16  | 50.88  | 13.64 | 3 |
| 9   | 4  | -16 | 47.59  | 12.91 | 1 |
| -9  | -4 | 16  | 42.51  | 13.00 | 3 |
| 8   | 4  | -16 | 5.31   | 8.16  | 1 |
| -8  | -4 | 16  | -1.79  | 4.79  | 3 |
| 7   | 4  | -16 | 32.34  | 10.88 | 1 |
| 6   | 4  | -16 | 12.35  | 7.87  | 1 |
| 5   | 4  | -16 | 32.73  | 9.21  | 1 |
| 4   | 4  | -16 | 220.46 | 19.02 | 1 |
| 3   | 4  | -16 | 18.85  | 6.94  | 1 |
| 2   | 4  | -16 | 63.90  | 12.14 | 1 |
| 1   | 4  | -16 | 90.60  | 13.45 | 1 |
| 0   | 4  | -16 | 14.19  | 5.71  | 1 |
| -1  | 4  | -16 | 4.84   | 5.22  | 1 |
| -2  | 4  | -16 | -0.87  | 4.82  | 1 |
| -4  | 4  | -16 | 15.82  | 9.81  | 2 |
| -5  | 4  | -16 | -0.62  | 7.27  | 2 |
| -6  | 4  | -16 | 28.85  | 12.12 | 2 |

|     |    |     |        |       |   |
|-----|----|-----|--------|-------|---|
| -7  | 4  | -16 | 7.29   | 9.27  | 2 |
| -14 | -3 | 16  | -6.45  | 8.28  | 3 |
| 13  | 3  | -16 | -7.15  | 7.24  | 1 |
| -13 | -3 | 16  | -6.53  | 8.63  | 3 |
| 12  | 3  | -16 | 3.58   | 8.05  | 1 |
| -12 | -3 | 16  | 1.44   | 7.91  | 3 |
| -11 | -3 | 16  | 134.91 | 20.04 | 3 |
| 11  | 3  | -16 | 99.61  | 16.74 | 1 |
| -10 | -3 | 16  | 57.38  | 14.15 | 3 |
| 10  | 3  | -16 | 64.47  | 14.88 | 1 |
| -9  | -3 | 16  | 55.57  | 13.69 | 3 |
| 9   | 3  | -16 | 64.33  | 14.71 | 1 |
| 8   | 3  | -16 | 61.66  | 13.45 | 1 |
| -8  | -3 | 16  | 26.02  | 10.13 | 3 |
| 7   | 3  | -16 | 11.88  | 7.81  | 1 |
| 6   | 3  | -16 | -2.10  | 5.60  | 1 |
| 5   | 3  | -16 | 4.66   | 5.27  | 1 |
| 4   | 3  | -16 | 0.57   | 4.20  | 1 |
| 3   | 3  | -16 | 181.29 | 18.52 | 1 |
| 2   | 3  | -16 | 152.01 | 16.92 | 1 |
| 1   | 3  | -16 | 3.55   | 4.44  | 1 |
| 0   | 3  | -16 | 4.26   | 5.31  | 1 |
| -1  | 3  | -16 | 5.46   | 5.18  | 1 |
| -4  | 3  | -16 | 28.50  | 10.93 | 2 |
| -5  | 3  | -16 | 4.78   | 7.47  | 2 |
| -6  | 3  | -16 | 34.35  | 11.31 | 2 |
| -14 | -2 | 16  | 47.97  | 14.75 | 3 |
| 13  | 2  | -16 | 4.51   | 9.01  | 1 |
| -13 | -2 | 16  | 25.48  | 9.97  | 3 |
| -12 | -2 | 16  | 6.19   | 7.80  | 3 |
| 12  | 2  | -16 | -0.57  | 8.71  | 1 |
| 11  | 2  | -16 | 78.15  | 15.88 | 1 |
| -11 | -2 | 16  | 69.85  | 14.96 | 3 |
| 10  | 2  | -16 | 124.30 | 18.26 | 1 |
| -10 | -2 | 16  | 98.74  | 17.46 | 3 |
| 9   | 2  | -16 | -5.82  | 6.49  | 1 |
| -9  | -2 | 16  | 4.31   | 6.80  | 3 |
| 8   | 2  | -16 | 4.80   | 6.64  | 1 |
| 7   | 2  | -16 | 24.15  | 9.31  | 1 |
| 6   | 2  | -16 | 33.90  | 9.78  | 1 |
| 5   | 2  | -16 | -5.08  | 4.09  | 1 |
| 4   | 2  | -16 | 86.42  | 13.99 | 1 |
| 3   | 2  | -16 | 120.06 | 15.99 | 1 |
| 2   | 2  | -16 | 23.55  | 8.06  | 1 |
| 1   | 2  | -16 | 15.55  | 6.58  | 1 |
| 0   | 2  | -16 | 46.24  | 10.20 | 1 |

|     |    |     |        |       |   |
|-----|----|-----|--------|-------|---|
| -1  | 2  | -16 | 6.96   | 5.35  | 1 |
| -3  | 2  | -16 | 18.94  | 9.91  | 2 |
| -4  | 2  | -16 | 60.22  | 13.56 | 2 |
| -5  | 2  | -16 | 1.45   | 7.74  | 2 |
| -6  | 2  | -16 | 69.44  | 16.01 | 2 |
| -15 | -1 | 16  | -9.35  | 9.11  | 3 |
| -14 | -1 | 16  | 44.99  | 14.27 | 3 |
| -13 | -1 | 16  | -8.82  | 7.31  | 3 |
| 13  | 1  | -16 | 0.61   | 8.23  | 1 |
| -12 | -1 | 16  | 5.59   | 9.39  | 3 |
| 12  | 1  | -16 | 3.72   | 8.69  | 1 |
| 11  | 1  | -16 | 47.40  | 12.74 | 1 |
| -11 | -1 | 16  | 49.32  | 12.53 | 3 |
| 10  | 1  | -16 | 1.99   | 7.04  | 1 |
| -10 | -1 | 16  | 2.19   | 7.86  | 3 |
| 9   | 1  | -16 | -3.68  | 6.89  | 1 |
| -9  | -1 | 16  | 0.37   | 7.10  | 3 |
| 8   | 1  | -16 | 2.78   | 7.00  | 1 |
| 7   | 1  | -16 | 98.51  | 16.74 | 1 |
| 6   | 1  | -16 | 44.84  | 11.08 | 1 |
| 5   | 1  | -16 | 7.67   | 5.29  | 1 |
| 4   | 1  | -16 | 6.30   | 5.32  | 1 |
| 3   | 1  | -16 | 17.07  | 6.75  | 1 |
| 2   | 1  | -16 | 42.92  | 9.89  | 1 |
| 1   | 1  | -16 | 284.80 | 21.31 | 1 |
| 0   | 1  | -16 | 89.88  | 13.78 | 1 |
| -1  | 1  | -16 | 26.61  | 7.65  | 1 |
| -3  | 1  | -16 | 2.88   | 8.87  | 2 |
| -4  | 1  | -16 | -1.29  | 7.60  | 2 |
| -5  | 1  | -16 | -5.12  | 7.16  | 2 |
| -6  | 1  | -16 | 5.09   | 9.15  | 2 |
| -15 | 0  | 16  | 1.26   | 9.72  | 3 |
| -14 | 0  | 16  | -0.42  | 8.84  | 3 |
| -13 | 0  | 16  | 57.14  | 14.96 | 3 |
| 13  | 0  | -16 | 40.03  | 12.97 | 1 |
| 12  | 0  | -16 | 97.30  | 17.11 | 1 |
| -12 | 0  | 16  | 68.70  | 15.51 | 3 |
| 11  | 0  | -16 | 7.04   | 7.89  | 1 |
| -11 | 0  | 16  | 8.55   | 7.96  | 3 |
| -10 | 0  | 16  | -6.10  | 5.59  | 3 |
| 10  | 0  | -16 | -11.73 | 6.55  | 1 |
| -9  | 0  | 16  | 26.35  | 10.18 | 3 |
| 9   | 0  | -16 | 29.74  | 12.03 | 1 |
| 8   | 0  | -16 | 280.69 | 23.95 | 1 |
| 7   | 0  | -16 | 387.82 | 27.99 | 1 |
| 6   | 0  | -16 | 50.42  | 10.97 | 1 |



|     |    |     |        |       |   |
|-----|----|-----|--------|-------|---|
| 5   | 0  | -16 | -2.85  | 5.29  | 1 |
| 4   | 0  | -16 | -0.36  | 5.07  | 1 |
| 3   | 0  | -16 | -4.02  | 5.08  | 1 |
| 2   | 0  | -16 | 11.04  | 6.75  | 1 |
| 1   | 0  | -16 | 23.07  | 7.84  | 1 |
| 0   | 0  | -16 | 86.12  | 13.96 | 1 |
| -1  | 0  | -16 | 2.00   | 6.00  | 1 |
| -3  | 0  | -16 | 12.25  | 8.79  | 2 |
| -4  | 0  | -16 | -2.06  | 8.03  | 2 |
| -5  | 0  | -16 | 64.71  | 15.06 | 2 |
| -15 | 1  | 16  | 10.22  | 11.30 | 3 |
| -14 | 1  | 16  | 33.59  | 13.81 | 3 |
| -13 | 1  | 16  | 148.24 | 22.67 | 3 |
| 13  | -1 | -16 | 205.60 | 22.44 | 1 |
| -12 | 1  | 16  | 8.20   | 8.74  | 3 |
| 12  | -1 | -16 | 27.45  | 10.61 | 1 |
| 11  | -1 | -16 | 43.15  | 13.69 | 1 |
| -11 | 1  | 16  | 38.58  | 12.69 | 3 |
| 10  | -1 | -16 | 103.34 | 17.74 | 1 |
| -10 | 1  | 16  | 90.39  | 18.14 | 3 |
| 9   | -1 | -16 | 114.86 | 17.95 | 1 |
| 8   | -1 | -16 | 4.49   | 7.94  | 1 |
| 7   | -1 | -16 | 38.91  | 11.43 | 1 |
| 6   | -1 | -16 | 134.67 | 18.17 | 1 |
| 5   | -1 | -16 | -4.10  | 4.57  | 1 |
| 4   | -1 | -16 | 4.49   | 6.18  | 1 |
| 3   | -1 | -16 | 104.93 | 15.52 | 1 |
| 2   | -1 | -16 | 19.95  | 8.14  | 1 |
| 1   | -1 | -16 | 163.34 | 18.60 | 1 |
| 0   | -1 | -16 | 105.84 | 15.37 | 1 |
| -1  | -1 | -16 | 6.05   | 6.58  | 1 |
| -3  | -1 | -16 | 15.65  | 9.23  | 2 |
| -4  | -1 | -16 | 1.75   | 8.86  | 2 |
| -5  | -1 | -16 | 11.34  | 9.68  | 2 |
| -14 | 2  | 16  | -4.76  | 8.65  | 3 |
| -13 | 2  | 16  | -0.67  | 8.36  | 3 |
| 13  | -2 | -16 | 15.01  | 9.41  | 1 |
| 12  | -2 | -16 | 37.59  | 12.88 | 1 |
| -12 | 2  | 16  | 49.15  | 13.97 | 3 |
| 11  | -2 | -16 | 72.71  | 15.44 | 1 |
| -11 | 2  | 16  | 53.64  | 14.85 | 3 |
| 10  | -2 | -16 | 270.30 | 25.57 | 1 |
| -10 | 2  | 16  | 253.63 | 27.38 | 3 |
| 9   | -2 | -16 | 118.90 | 18.46 | 1 |
| 8   | -2 | -16 | 15.44  | 10.18 | 1 |
| 7   | -2 | -16 | -7.05  | 7.82  | 1 |

|     |    |     |        |       |   |
|-----|----|-----|--------|-------|---|
| 6   | -2 | -16 | 32.03  | 9.66  | 1 |
| 5   | -2 | -16 | 9.62   | 6.27  | 1 |
| 4   | -2 | -16 | 8.41   | 6.64  | 1 |
| 3   | -2 | -16 | 182.38 | 19.79 | 1 |
| 2   | -2 | -16 | 108.02 | 15.49 | 1 |
| 1   | -2 | -16 | 97.90  | 15.45 | 1 |
| 0   | -2 | -16 | -0.09  | 5.86  | 1 |
| -1  | -2 | -16 | 3.94   | 6.28  | 1 |
| -3  | -2 | -16 | 15.35  | 9.66  | 2 |
| -4  | -2 | -16 | 0.59   | 8.71  | 2 |
| -14 | 3  | 16  | 32.24  | 13.06 | 3 |
| 13  | -3 | -16 | 9.75   | 9.80  | 1 |
| -13 | 3  | 16  | 2.17   | 8.48  | 3 |
| 12  | -3 | -16 | 230.88 | 23.74 | 1 |
| -12 | 3  | 16  | 135.19 | 22.32 | 3 |
| 11  | -3 | -16 | 46.46  | 13.06 | 1 |
| -11 | 3  | 16  | 39.67  | 12.91 | 3 |
| 10  | -3 | -16 | 52.44  | 14.73 | 1 |
| 9   | -3 | -16 | 63.88  | 15.15 | 1 |
| 8   | -3 | -16 | 149.81 | 20.06 | 1 |
| 7   | -3 | -16 | 24.81  | 10.92 | 1 |
| 6   | -3 | -16 | 6.49   | 6.23  | 1 |
| 5   | -3 | -16 | 10.05  | 6.37  | 1 |
| 4   | -3 | -16 | 11.88  | 7.20  | 1 |
| 3   | -3 | -16 | 90.44  | 15.08 | 1 |
| 2   | -3 | -16 | -6.58  | 5.27  | 1 |
| 1   | -3 | -16 | 81.49  | 14.29 | 1 |
| 0   | -3 | -16 | 5.67   | 6.55  | 1 |
| -1  | -3 | -16 | 28.58  | 9.58  | 1 |
| -3  | -3 | -16 | 15.01  | 10.00 | 2 |
| -4  | -3 | -16 | 2.91   | 8.78  | 2 |
| -14 | 4  | 16  | 115.86 | 22.34 | 3 |
| 13  | -4 | -16 | 27.14  | 11.30 | 1 |
| -13 | 4  | 16  | 16.72  | 11.39 | 3 |
| -12 | 4  | 16  | 32.21  | 13.72 | 3 |
| 12  | -4 | -16 | 30.92  | 11.91 | 1 |
| 11  | -4 | -16 | -2.06  | 7.56  | 1 |
| -11 | 4  | 16  | -6.13  | 7.63  | 3 |
| 10  | -4 | -16 | -1.92  | 7.84  | 1 |
| 9   | -4 | -16 | 26.37  | 11.30 | 1 |
| 8   | -4 | -16 | 6.44   | 8.09  | 1 |
| 7   | -4 | -16 | 19.18  | 10.15 | 1 |
| 6   | -4 | -16 | 19.96  | 7.75  | 1 |
| 5   | -4 | -16 | 30.46  | 9.54  | 1 |
| 4   | -4 | -16 | 86.76  | 15.66 | 1 |
| 3   | -4 | -16 | 7.02   | 6.19  | 1 |

|     |    |     |        |       |   |
|-----|----|-----|--------|-------|---|
| 2   | -4 | -16 | 109.17 | 16.88 | 1 |
| 1   | -4 | -16 | 1.41   | 6.52  | 1 |
| 0   | -4 | -16 | 98.10  | 15.93 | 1 |
| -1  | -4 | -16 | 34.37  | 9.77  | 1 |
| -3  | -4 | -16 | 40.49  | 13.35 | 2 |
| -14 | 5  | 16  | -5.67  | 6.98  | 3 |
| 13  | -5 | -16 | 22.83  | 11.32 | 1 |
| -13 | 5  | 16  | 5.65   | 8.34  | 3 |
| -12 | 5  | 16  | 3.50   | 8.65  | 3 |
| 12  | -5 | -16 | 27.88  | 12.02 | 1 |
| 11  | -5 | -16 | 118.05 | 18.72 | 1 |
| 10  | -5 | -16 | 4.70   | 8.19  | 1 |
| 9   | -5 | -16 | 57.09  | 14.96 | 1 |
| 8   | -5 | -16 | 2.52   | 8.66  | 1 |
| 7   | -5 | -16 | 45.37  | 13.62 | 1 |
| 6   | -5 | -16 | 81.44  | 15.26 | 1 |
| 5   | -5 | -16 | 107.03 | 17.66 | 1 |
| 4   | -5 | -16 | 38.84  | 11.31 | 1 |
| 3   | -5 | -16 | 2.98   | 6.93  | 1 |
| 2   | -5 | -16 | 100.80 | 16.01 | 1 |
| 1   | -5 | -16 | 3.30   | 6.75  | 1 |
| 0   | -5 | -16 | 7.63   | 7.39  | 1 |
| -1  | -5 | -16 | 111.18 | 17.37 | 1 |
| 13  | -6 | -16 | 94.02  | 18.10 | 1 |
| 12  | -6 | -16 | 11.08  | 9.82  | 1 |
| 11  | -6 | -16 | 17.03  | 10.22 | 1 |
| 10  | -6 | -16 | 73.31  | 15.87 | 1 |
| 9   | -6 | -16 | -4.07  | 7.93  | 1 |
| 8   | -6 | -16 | 321.40 | 27.54 | 1 |
| 7   | -6 | -16 | 91.15  | 17.77 | 1 |
| 6   | -6 | -16 | 2.99   | 6.51  | 1 |
| 5   | -6 | -16 | -3.82  | 7.58  | 1 |
| 4   | -6 | -16 | 86.87  | 15.74 | 1 |
| 3   | -6 | -16 | 150.35 | 20.31 | 1 |
| 2   | -6 | -16 | 159.91 | 21.02 | 1 |
| 1   | -6 | -16 | 30.97  | 10.81 | 1 |
| 0   | -6 | -16 | 24.59  | 9.86  | 1 |
| -1  | -6 | -16 | 22.90  | 10.44 | 1 |
| 13  | -7 | -16 | 108.60 | 18.29 | 1 |
| 12  | -7 | -16 | 43.74  | 13.28 | 1 |
| 11  | -7 | -16 | 22.32  | 10.89 | 1 |
| 10  | -7 | -16 | 12.76  | 9.61  | 1 |
| 9   | -7 | -16 | 12.21  | 9.49  | 1 |
| 8   | -7 | -16 | 136.41 | 21.32 | 1 |
| 7   | -7 | -16 | 12.92  | 9.56  | 1 |
| 6   | -7 | -16 | 20.77  | 9.35  | 1 |

|    |    |     |        |       |   |
|----|----|-----|--------|-------|---|
| 5  | -7 | -16 | -11.76 | 6.21  | 1 |
| 4  | -7 | -16 | 27.57  | 11.12 | 1 |
| 3  | -7 | -16 | 4.91   | 7.28  | 1 |
| 2  | -7 | -16 | 21.26  | 10.61 | 1 |
| 1  | -7 | -16 | 120.23 | 19.00 | 1 |
| 0  | -7 | -16 | 120.20 | 18.91 | 1 |
| 12 | -8 | -16 | 1.66   | 8.02  | 1 |
| 11 | -8 | -16 | 35.18  | 13.44 | 1 |
| 10 | -8 | -16 | 5.74   | 8.33  | 1 |
| 9  | -8 | -16 | -1.08  | 7.70  | 1 |
| 8  | -8 | -16 | -5.67  | 8.11  | 1 |
| 7  | -8 | -16 | -3.63  | 8.24  | 1 |
| 6  | -8 | -16 | 21.78  | 10.26 | 1 |
| 5  | -8 | -16 | -7.18  | 7.17  | 1 |
| 4  | -8 | -16 | 3.81   | 8.06  | 1 |
| 3  | -8 | -16 | 37.93  | 12.00 | 1 |
| 2  | -8 | -16 | -1.47  | 8.17  | 1 |
| 1  | -8 | -16 | 64.80  | 15.00 | 1 |
| 11 | -9 | -16 | 32.98  | 12.56 | 1 |
| 10 | -9 | -16 | 0.26   | 7.16  | 1 |
| 9  | -9 | -16 | -8.46  | 6.53  | 1 |
| 8  | -9 | -16 | -4.32  | 6.81  | 1 |
| 7  | -9 | -16 | 2.65   | 7.97  | 1 |
| 6  | -9 | -16 | 3.08   | 9.19  | 1 |
| 5  | -9 | -16 | 8.15   | 8.39  | 1 |
| 4  | -9 | -16 | 83.73  | 16.63 | 1 |
| 3  | -9 | -16 | 67.82  | 15.12 | 1 |
| 3  | 15 | -17 | 2.20   | 7.84  | 1 |
| 2  | 15 | -17 | 118.07 | 18.62 | 1 |
| 1  | 15 | -17 | -1.68  | 7.77  | 1 |
| 0  | 15 | -17 | 30.06  | 10.40 | 1 |
| -1 | 15 | -17 | -5.63  | 5.92  | 1 |
| 5  | 14 | -17 | -10.06 | 7.38  | 1 |
| 4  | 14 | -17 | 30.79  | 12.32 | 1 |
| 3  | 14 | -17 | 127.66 | 19.94 | 1 |
| 2  | 14 | -17 | 48.82  | 12.33 | 1 |
| 1  | 14 | -17 | 11.62  | 7.84  | 1 |
| 0  | 14 | -17 | 10.34  | 6.88  | 1 |
| -1 | 14 | -17 | 6.38   | 7.11  | 1 |
| 7  | 13 | -17 | -4.87  | 6.54  | 1 |
| 6  | 13 | -17 | 2.61   | 7.10  | 1 |
| 5  | 13 | -17 | 36.70  | 11.85 | 1 |
| 4  | 13 | -17 | 2.65   | 6.28  | 1 |
| 3  | 13 | -17 | 4.21   | 7.44  | 1 |
| 2  | 13 | -17 | 0.87   | 6.72  | 1 |
| 1  | 13 | -17 | 24.34  | 9.68  | 1 |

|    |    |     |        |       |   |
|----|----|-----|--------|-------|---|
| 0  | 13 | -17 | 35.76  | 10.73 | 1 |
| -1 | 13 | -17 | 57.43  | 12.33 | 1 |
| 8  | 12 | -17 | -8.03  | 5.76  | 1 |
| 7  | 12 | -17 | -3.82  | 6.61  | 1 |
| 6  | 12 | -17 | 2.94   | 8.24  | 1 |
| 5  | 12 | -17 | 9.47   | 7.68  | 1 |
| 4  | 12 | -17 | -2.14  | 7.16  | 1 |
| 3  | 12 | -17 | 3.79   | 6.97  | 1 |
| 2  | 12 | -17 | 18.15  | 8.49  | 1 |
| 1  | 12 | -17 | 4.45   | 5.48  | 1 |
| 0  | 12 | -17 | 4.89   | 5.68  | 1 |
| -1 | 12 | -17 | 38.91  | 10.04 | 1 |
| 9  | 11 | -17 | -10.57 | 6.34  | 1 |
| 8  | 11 | -17 | -4.07  | 7.10  | 1 |
| 7  | 11 | -17 | -2.87  | 7.19  | 1 |
| 6  | 11 | -17 | 6.44   | 9.09  | 1 |
| 5  | 11 | -17 | 12.05  | 8.57  | 1 |
| 4  | 11 | -17 | 34.98  | 10.69 | 1 |
| 3  | 11 | -17 | 45.10  | 11.28 | 1 |
| 2  | 11 | -17 | 92.49  | 15.52 | 1 |
| 1  | 11 | -17 | 7.24   | 6.81  | 1 |
| 0  | 11 | -17 | 1.52   | 5.06  | 1 |
| -1 | 11 | -17 | 21.65  | 7.64  | 1 |
| 10 | 10 | -17 | 2.12   | 7.53  | 1 |
| 9  | 10 | -17 | 8.08   | 8.31  | 1 |
| 8  | 10 | -17 | 10.68  | 8.23  | 1 |
| 7  | 10 | -17 | 44.78  | 12.48 | 1 |
| 6  | 10 | -17 | 56.72  | 13.81 | 1 |
| 5  | 10 | -17 | 12.68  | 7.46  | 1 |
| 4  | 10 | -17 | 14.43  | 8.96  | 1 |
| 3  | 10 | -17 | -2.46  | 5.18  | 1 |
| 2  | 10 | -17 | 54.48  | 11.72 | 1 |
| 1  | 10 | -17 | 57.74  | 11.74 | 1 |
| 0  | 10 | -17 | 59.59  | 11.76 | 1 |
| -1 | 10 | -17 | 14.68  | 7.37  | 1 |
| 11 | 9  | -17 | -1.93  | 8.16  | 1 |
| 10 | 9  | -17 | 17.39  | 9.52  | 1 |
| 9  | 9  | -17 | 30.87  | 11.05 | 1 |
| 8  | 9  | -17 | 177.22 | 23.20 | 1 |
| 7  | 9  | -17 | 9.74   | 9.31  | 1 |
| 6  | 9  | -17 | 9.83   | 8.27  | 1 |
| 5  | 9  | -17 | 71.55  | 14.24 | 1 |
| 4  | 9  | -17 | 13.92  | 6.61  | 1 |
| 3  | 9  | -17 | 136.43 | 18.13 | 1 |
| 2  | 9  | -17 | 45.51  | 11.13 | 1 |
| 1  | 9  | -17 | 45.26  | 10.11 | 1 |

|    |      |        |       |   |
|----|------|--------|-------|---|
| 0  | 9-17 | 8.80   | 5.75  | 1 |
| -1 | 9-17 | 2.50   | 5.54  | 1 |
| 11 | 8-17 | 10.94  | 9.41  | 1 |
| 10 | 8-17 | 2.29   | 8.32  | 1 |
| 9  | 8-17 | 41.92  | 13.21 | 1 |
| 8  | 8-17 | 5.94   | 7.84  | 1 |
| 7  | 8-17 | 11.54  | 9.62  | 1 |
| 6  | 8-17 | -0.04  | 6.01  | 1 |
| 5  | 8-17 | 131.35 | 18.53 | 1 |
| 4  | 8-17 | 130.96 | 17.73 | 1 |
| 3  | 8-17 | 56.30  | 11.89 | 1 |
| 2  | 8-17 | 17.40  | 7.81  | 1 |
| 1  | 8-17 | 115.89 | 16.19 | 1 |
| 0  | 8-17 | 56.73  | 11.86 | 1 |
| -1 | 8-17 | 96.60  | 14.37 | 1 |
| -6 | 8-17 | 6.02   | 8.07  | 2 |
| 12 | 7-17 | 7.23   | 9.23  | 1 |
| 11 | 7-17 | 224.61 | 24.98 | 1 |
| 10 | 7-17 | 108.80 | 18.90 | 1 |
| 9  | 7-17 | 34.53  | 12.77 | 1 |
| 8  | 7-17 | 39.26  | 12.36 | 1 |
| 7  | 7-17 | 5.71   | 7.67  | 1 |
| 6  | 7-17 | -3.99  | 4.47  | 1 |
| 5  | 7-17 | 91.30  | 15.37 | 1 |
| 4  | 7-17 | -2.53  | 4.97  | 1 |
| 3  | 7-17 | 23.57  | 8.14  | 1 |
| 2  | 7-17 | 12.34  | 6.92  | 1 |
| 1  | 7-17 | 20.48  | 7.23  | 1 |
| 0  | 7-17 | 9.45   | 6.38  | 1 |
| -1 | 7-17 | 76.35  | 13.11 | 1 |
| -6 | 7-17 | 21.30  | 10.33 | 2 |
| 13 | 6-17 | -0.08  | 8.22  | 1 |
| 12 | 6-17 | 0.63   | 8.02  | 1 |
| 11 | 6-17 | 72.49  | 15.83 | 1 |
| 10 | 6-17 | 42.28  | 12.77 | 1 |
| 9  | 6-17 | 57.70  | 14.26 | 1 |
| 8  | 6-17 | 5.71   | 8.42  | 1 |
| 7  | 6-17 | 97.03  | 17.24 | 1 |
| 6  | 6-17 | 56.61  | 12.76 | 1 |
| 5  | 6-17 | 0.64   | 5.49  | 1 |
| 4  | 6-17 | 264.00 | 22.05 | 1 |
| 3  | 6-17 | -0.91  | 5.55  | 1 |
| 2  | 6-17 | 137.04 | 17.13 | 1 |
| 1  | 6-17 | 7.72   | 5.84  | 1 |
| 0  | 6-17 | 6.37   | 5.48  | 1 |
| -1 | 6-17 | 117.29 | 15.83 | 1 |

|     |    |     |        |       |   |
|-----|----|-----|--------|-------|---|
| -6  | 6  | -17 | 23.31  | 11.06 | 2 |
| -13 | -5 | 17  | 335.89 | 30.28 | 3 |
| 13  | 5  | -17 | 354.11 | 29.00 | 1 |
| -12 | -5 | 17  | 37.04  | 12.52 | 3 |
| 12  | 5  | -17 | 12.16  | 9.47  | 1 |
| 11  | 5  | -17 | 3.17   | 7.58  | 1 |
| -11 | -5 | 17  | -9.34  | 7.05  | 3 |
| -10 | -5 | 17  | 54.50  | 13.88 | 3 |
| 10  | 5  | -17 | 47.69  | 13.56 | 1 |
| -9  | -5 | 17  | 0.07   | 7.45  | 3 |
| 9   | 5  | -17 | -1.17  | 7.66  | 1 |
| 8   | 5  | -17 | 118.46 | 18.78 | 1 |
| 7   | 5  | -17 | 13.23  | 8.25  | 1 |
| 6   | 5  | -17 | 114.20 | 17.27 | 1 |
| 5   | 5  | -17 | -1.69  | 5.40  | 1 |
| 4   | 5  | -17 | 297.31 | 23.69 | 1 |
| 3   | 5  | -17 | 1.53   | 5.68  | 1 |
| 2   | 5  | -17 | 13.95  | 6.52  | 1 |
| 1   | 5  | -17 | 264.75 | 21.09 | 1 |
| 0   | 5  | -17 | 242.86 | 20.03 | 1 |
| -1  | 5  | -17 | 17.14  | 7.24  | 1 |
| -6  | 5  | -17 | 2.95   | 7.57  | 2 |
| 13  | 4  | -17 | 44.42  | 13.70 | 1 |
| -13 | -4 | 17  | 71.02  | 17.33 | 3 |
| -12 | -4 | 17  | 73.73  | 16.93 | 3 |
| 12  | 4  | -17 | 68.14  | 15.85 | 1 |
| -11 | -4 | 17  | 16.28  | 9.30  | 3 |
| 11  | 4  | -17 | 33.08  | 11.69 | 1 |
| -10 | -4 | 17  | 98.76  | 18.95 | 3 |
| 10  | 4  | -17 | 91.74  | 17.22 | 1 |
| -9  | -4 | 17  | 134.71 | 20.87 | 3 |
| 9   | 4  | -17 | 130.73 | 19.23 | 1 |
| 8   | 4  | -17 | 2.61   | 7.68  | 1 |
| 7   | 4  | -17 | 7.54   | 7.61  | 1 |
| 6   | 4  | -17 | 296.08 | 23.40 | 1 |
| 5   | 4  | -17 | 17.78  | 7.76  | 1 |
| 4   | 4  | -17 | 340.17 | 25.05 | 1 |
| 3   | 4  | -17 | 1.32   | 5.66  | 1 |
| 2   | 4  | -17 | 6.41   | 5.99  | 1 |
| 1   | 4  | -17 | 110.18 | 15.67 | 1 |
| 0   | 4  | -17 | 4.26   | 6.16  | 1 |
| -1  | 4  | -17 | 52.93  | 11.41 | 1 |
| -5  | 4  | -17 | 1.69   | 8.67  | 2 |
| 13  | 3  | -17 | -11.39 | 7.19  | 1 |
| -13 | -3 | 17  | -2.56  | 8.99  | 3 |
| 12  | 3  | -17 | 82.29  | 16.78 | 1 |

|     |    |     |        |       |   |
|-----|----|-----|--------|-------|---|
| -12 | -3 | 17  | 42.33  | 13.53 | 3 |
| 11  | 3  | -17 | 12.41  | 9.12  | 1 |
| -11 | -3 | 17  | 3.85   | 8.13  | 3 |
| -10 | -3 | 17  | 119.84 | 19.76 | 3 |
| 10  | 3  | -17 | 114.40 | 18.87 | 1 |
| 9   | 3  | -17 | -11.18 | 6.49  | 1 |
| -9  | -3 | 17  | -6.71  | 7.61  | 3 |
| 8   | 3  | -17 | 43.75  | 12.56 | 1 |
| 7   | 3  | -17 | 14.17  | 8.76  | 1 |
| 6   | 3  | -17 | 72.02  | 13.81 | 1 |
| 5   | 3  | -17 | 17.12  | 7.62  | 1 |
| 4   | 3  | -17 | 31.18  | 9.28  | 1 |
| 3   | 3  | -17 | 405.86 | 26.64 | 1 |
| 2   | 3  | -17 | 136.96 | 16.94 | 1 |
| 1   | 3  | -17 | 12.37  | 6.43  | 1 |
| 0   | 3  | -17 | 3.03   | 6.80  | 1 |
| -1  | 3  | -17 | 4.60   | 5.72  | 1 |
| -5  | 3  | -17 | 35.18  | 11.61 | 2 |
| -14 | -2 | 17  | -16.45 | 8.64  | 3 |
| -13 | -2 | 17  | 15.77  | 9.88  | 3 |
| 13  | 2  | -17 | 11.49  | 10.49 | 1 |
| 12  | 2  | -17 | 59.33  | 15.30 | 1 |
| -12 | -2 | 17  | 17.66  | 11.44 | 3 |
| 11  | 2  | -17 | 12.83  | 9.51  | 1 |
| -11 | -2 | 17  | -2.87  | 5.93  | 3 |
| 10  | 2  | -17 | 49.22  | 13.30 | 1 |
| -10 | -2 | 17  | 52.84  | 14.47 | 3 |
| 9   | 2  | -17 | 146.10 | 20.46 | 1 |
| -9  | -2 | 17  | 126.51 | 20.09 | 3 |
| 8   | 2  | -17 | 30.52  | 11.27 | 1 |
| 7   | 2  | -17 | 2.64   | 6.48  | 1 |
| 6   | 2  | -17 | 15.34  | 7.38  | 1 |
| 5   | 2  | -17 | 59.77  | 12.50 | 1 |
| 4   | 2  | -17 | 21.58  | 8.46  | 1 |
| 3   | 2  | -17 | 45.63  | 11.29 | 1 |
| 2   | 2  | -17 | 49.63  | 11.74 | 1 |
| 1   | 2  | -17 | 71.88  | 13.62 | 1 |
| 0   | 2  | -17 | 89.99  | 14.56 | 1 |
| -1  | 2  | -17 | 45.13  | 10.10 | 1 |
| -5  | 2  | -17 | 5.37   | 8.90  | 2 |
| -14 | -1 | 17  | -3.35  | 8.42  | 3 |
| -13 | -1 | 17  | 9.27   | 9.81  | 3 |
| 13  | 1  | -17 | -0.13  | 8.38  | 1 |
| -12 | -1 | 17  | 20.41  | 10.53 | 3 |
| 12  | 1  | -17 | 1.42   | 8.21  | 1 |
| 11  | 1  | -17 | 6.45   | 8.24  | 1 |



|     |    |     |        |       |   |
|-----|----|-----|--------|-------|---|
| -11 | -1 | 17  | 10.21  | 9.77  | 3 |
| 10  | 1  | -17 | -5.22  | 7.07  | 1 |
| -10 | -1 | 17  | -1.61  | 6.89  | 3 |
| 9   | 1  | -17 | -4.08  | 6.54  | 1 |
| 8   | 1  | -17 | 16.71  | 9.72  | 1 |
| 7   | 1  | -17 | 8.82   | 9.11  | 1 |
| 6   | 1  | -17 | 61.03  | 12.76 | 1 |
| 5   | 1  | -17 | 164.09 | 19.28 | 1 |
| 4   | 1  | -17 | 10.27  | 6.56  | 1 |
| 3   | 1  | -17 | 18.09  | 7.58  | 1 |
| 2   | 1  | -17 | 80.11  | 14.33 | 1 |
| 1   | 1  | -17 | 70.29  | 13.50 | 1 |
| 0   | 1  | -17 | 117.00 | 15.94 | 1 |
| -1  | 1  | -17 | 16.86  | 7.78  | 1 |
| -14 | 0  | 17  | -7.94  | 9.72  | 3 |
| -13 | 0  | 17  | -1.63  | 9.15  | 3 |
| 13  | 0  | -17 | 17.47  | 9.77  | 1 |
| -12 | 0  | 17  | 56.11  | 15.63 | 3 |
| 12  | 0  | -17 | 66.67  | 15.49 | 1 |
| 11  | 0  | -17 | 131.06 | 19.72 | 1 |
| -11 | 0  | 17  | 109.07 | 20.51 | 3 |
| -10 | 0  | 17  | 3.88   | 7.39  | 3 |
| 10  | 0  | -17 | 8.83   | 9.12  | 1 |
| 9   | 0  | -17 | 4.19   | 8.29  | 1 |
| 8   | 0  | -17 | 3.95   | 8.24  | 1 |
| 7   | 0  | -17 | 1.65   | 7.63  | 1 |
| 6   | 0  | -17 | 18.37  | 8.21  | 1 |
| 5   | 0  | -17 | 14.50  | 7.86  | 1 |
| 4   | 0  | -17 | 188.03 | 20.60 | 1 |
| 3   | 0  | -17 | 4.68   | 6.41  | 1 |
| 2   | 0  | -17 | 21.13  | 8.39  | 1 |
| 1   | 0  | -17 | 16.93  | 7.89  | 1 |
| 0   | 0  | -17 | 74.93  | 14.16 | 1 |
| -1  | 0  | -17 | 148.20 | 17.73 | 1 |
| -14 | 1  | 17  | -5.01  | 9.16  | 3 |
| 13  | -1 | -17 | 3.86   | 8.63  | 1 |
| -13 | 1  | 17  | 19.01  | 11.86 | 3 |
| 12  | -1 | -17 | 15.67  | 10.18 | 1 |
| -12 | 1  | 17  | 20.01  | 12.03 | 3 |
| -11 | 1  | 17  | -10.43 | 6.76  | 3 |
| 11  | -1 | -17 | 8.28   | 8.85  | 1 |
| 10  | -1 | -17 | 70.06  | 15.85 | 1 |
| 9   | -1 | -17 | 58.28  | 15.06 | 1 |
| 8   | -1 | -17 | 6.41   | 7.53  | 1 |
| 7   | -1 | -17 | 116.68 | 18.79 | 1 |
| 6   | -1 | -17 | 6.61   | 5.71  | 1 |

|     |    |     |       |       |   |
|-----|----|-----|-------|-------|---|
| 5   | -1 | -17 | 13.22 | 7.01  | 1 |
| 4   | -1 | -17 | 83.51 | 14.69 | 1 |
| 3   | -1 | -17 | 6.18  | 6.39  | 1 |
| 2   | -1 | -17 | 12.13 | 6.83  | 1 |
| 1   | -1 | -17 | 8.39  | 6.54  | 1 |
| 0   | -1 | -17 | 1.35  | 6.04  | 1 |
| -1  | -1 | -17 | 32.67 | 9.48  | 1 |
| 14  | -2 | -17 | 27.51 | 12.26 | 1 |
| -14 | 2  | 17  | 24.34 | 12.51 | 3 |
| 13  | -2 | -17 | 2.33  | 7.95  | 1 |
| -13 | 2  | 17  | 16.55 | 12.44 | 3 |
| 12  | -2 | -17 | 50.59 | 14.28 | 1 |
| -12 | 2  | 17  | 32.81 | 13.37 | 3 |
| -11 | 2  | 17  | 27.49 | 11.86 | 3 |
| 11  | -2 | -17 | 35.12 | 12.01 | 1 |
| 10  | -2 | -17 | 80.33 | 17.20 | 1 |
| 9   | -2 | -17 | 16.28 | 10.42 | 1 |
| 8   | -2 | -17 | 25.40 | 11.29 | 1 |
| 7   | -2 | -17 | 1.28  | 8.35  | 1 |
| 6   | -2 | -17 | 20.90 | 8.27  | 1 |
| 5   | -2 | -17 | 5.40  | 5.54  | 1 |
| 4   | -2 | -17 | 10.60 | 6.99  | 1 |
| 3   | -2 | -17 | 77.48 | 14.15 | 1 |
| 2   | -2 | -17 | 77.62 | 13.88 | 1 |
| 1   | -2 | -17 | 3.55  | 5.91  | 1 |
| 0   | -2 | -17 | 14.20 | 7.45  | 1 |
| -1  | -2 | -17 | 14.20 | 8.23  | 1 |
| 13  | -3 | -17 | 1.53  | 8.96  | 1 |
| -13 | 3  | 17  | 4.53  | 10.44 | 3 |
| 12  | -3 | -17 | 50.20 | 13.27 | 1 |
| -12 | 3  | 17  | 30.70 | 13.64 | 3 |
| 11  | -3 | -17 | 5.15  | 9.91  | 1 |
| 10  | -3 | -17 | 9.22  | 8.45  | 1 |
| 9   | -3 | -17 | 34.28 | 12.53 | 1 |
| 8   | -3 | -17 | 73.22 | 16.28 | 1 |
| 7   | -3 | -17 | 0.29  | 8.52  | 1 |
| 6   | -3 | -17 | 2.16  | 6.30  | 1 |
| 5   | -3 | -17 | 17.03 | 8.64  | 1 |
| 4   | -3 | -17 | 9.88  | 6.42  | 1 |
| 3   | -3 | -17 | 3.00  | 6.76  | 1 |
| 2   | -3 | -17 | 25.47 | 9.23  | 1 |
| 1   | -3 | -17 | 45.52 | 11.99 | 1 |
| 0   | -3 | -17 | 2.86  | 6.97  | 1 |
| -1  | -3 | -17 | -1.15 | 7.32  | 1 |
| -13 | 4  | 17  | -5.03 | 8.92  | 3 |
| 13  | -4 | -17 | -3.95 | 8.43  | 1 |

|     |    |     |        |       |   |
|-----|----|-----|--------|-------|---|
| 12  | -4 | -17 | 69.24  | 15.85 | 1 |
| 11  | -4 | -17 | 5.95   | 10.23 | 1 |
| 10  | -4 | -17 | 49.58  | 13.62 | 1 |
| 9   | -4 | -17 | -1.32  | 7.77  | 1 |
| 8   | -4 | -17 | 0.27   | 9.06  | 1 |
| 7   | -4 | -17 | 13.31  | 9.14  | 1 |
| 6   | -4 | -17 | 9.46   | 7.96  | 1 |
| 5   | -4 | -17 | 125.84 | 18.78 | 1 |
| 4   | -4 | -17 | 30.48  | 10.59 | 1 |
| 3   | -4 | -17 | 9.59   | 8.78  | 1 |
| 2   | -4 | -17 | 11.51  | 7.76  | 1 |
| 1   | -4 | -17 | 0.05   | 7.51  | 1 |
| 0   | -4 | -17 | 5.47   | 6.72  | 1 |
| -13 | 5  | 17  | 3.88   | 8.00  | 3 |
| 13  | -5 | -17 | 1.92   | 8.58  | 1 |
| 12  | -5 | -17 | 6.90   | 9.49  | 1 |
| 11  | -5 | -17 | 126.17 | 20.31 | 1 |
| 10  | -5 | -17 | -2.89  | 7.09  | 1 |
| 9   | -5 | -17 | 18.09  | 10.90 | 1 |
| 8   | -5 | -17 | 0.43   | 9.15  | 1 |
| 7   | -5 | -17 | 26.25  | 11.41 | 1 |
| 6   | -5 | -17 | 14.47  | 8.65  | 1 |
| 5   | -5 | -17 | -11.09 | 6.44  | 1 |
| 4   | -5 | -17 | 86.10  | 17.00 | 1 |
| 3   | -5 | -17 | 39.31  | 11.49 | 1 |
| 2   | -5 | -17 | 1.67   | 8.01  | 1 |
| 1   | -5 | -17 | 0.29   | 8.32  | 1 |
| 0   | -5 | -17 | 6.10   | 8.38  | 1 |
| 12  | -6 | -17 | -2.78  | 9.16  | 1 |
| 11  | -6 | -17 | 9.53   | 9.26  | 1 |
| 10  | -6 | -17 | 2.74   | 9.04  | 1 |
| 9   | -6 | -17 | -2.61  | 8.34  | 1 |
| 8   | -6 | -17 | 8.62   | 9.30  | 1 |
| 7   | -6 | -17 | 13.33  | 9.04  | 1 |
| 6   | -6 | -17 | 1.68   | 7.93  | 1 |
| 5   | -6 | -17 | 21.54  | 9.70  | 1 |
| 4   | -6 | -17 | 60.61  | 13.43 | 1 |
| 3   | -6 | -17 | 43.72  | 12.94 | 1 |
| 2   | -6 | -17 | 44.61  | 12.15 | 1 |
| 1   | -6 | -17 | 107.04 | 18.40 | 1 |
| 11  | -7 | -17 | 4.84   | 9.69  | 1 |
| 10  | -7 | -17 | 1.56   | 6.51  | 1 |
| 9   | -7 | -17 | -5.22  | 6.13  | 1 |
| 8   | -7 | -17 | 1.65   | 7.53  | 1 |
| 7   | -7 | -17 | 2.78   | 7.40  | 1 |
| 6   | -7 | -17 | 100.58 | 18.02 | 1 |

|    |    |     |        |       |   |
|----|----|-----|--------|-------|---|
| 5  | -7 | -17 | 9.35   | 9.45  | 1 |
| 4  | -7 | -17 | 3.51   | 8.89  | 1 |
| 3  | -7 | -17 | 17.99  | 11.06 | 1 |
| 2  | -7 | -17 | 4.94   | 9.21  | 1 |
| 10 | -8 | -17 | 9.48   | 8.15  | 1 |
| 9  | -8 | -17 | 7.13   | 7.38  | 1 |
| 8  | -8 | -17 | -8.90  | 5.89  | 1 |
| 7  | -8 | -17 | 2.73   | 7.72  | 1 |
| 6  | -8 | -17 | 95.92  | 18.34 | 1 |
| 5  | -8 | -17 | 27.33  | 10.23 | 1 |
| 4  | -8 | -17 | 23.08  | 10.61 | 1 |
| 3  | 14 | -18 | 12.05  | 9.07  | 1 |
| 2  | 14 | -18 | 15.21  | 10.15 | 1 |
| 1  | 14 | -18 | 114.32 | 18.75 | 1 |
| 0  | 14 | -18 | 5.71   | 8.13  | 1 |
| 5  | 13 | -18 | 123.79 | 20.05 | 1 |
| 4  | 13 | -18 | 58.92  | 15.36 | 1 |
| 3  | 13 | -18 | -5.53  | 7.61  | 1 |
| 2  | 13 | -18 | 123.23 | 19.35 | 1 |
| 1  | 13 | -18 | 34.68  | 11.32 | 1 |
| 0  | 13 | -18 | 48.68  | 12.03 | 1 |
| -1 | 13 | -18 | 17.36  | 9.64  | 1 |
| 7  | 12 | -18 | 4.05   | 6.88  | 1 |
| 6  | 12 | -18 | -7.39  | 6.82  | 1 |
| 5  | 12 | -18 | 39.97  | 13.42 | 1 |
| 4  | 12 | -18 | 8.37   | 8.34  | 1 |
| 3  | 12 | -18 | 4.16   | 6.65  | 1 |
| 2  | 12 | -18 | 11.84  | 8.06  | 1 |
| 1  | 12 | -18 | 12.27  | 8.04  | 1 |
| 0  | 12 | -18 | 9.51   | 7.43  | 1 |
| -1 | 12 | -18 | 12.08  | 6.75  | 1 |
| 8  | 11 | -18 | 2.45   | 7.31  | 1 |
| 7  | 11 | -18 | -5.04  | 6.14  | 1 |
| 6  | 11 | -18 | 2.94   | 7.77  | 1 |
| 5  | 11 | -18 | -9.02  | 6.94  | 1 |
| 4  | 11 | -18 | 41.66  | 12.04 | 1 |
| 3  | 11 | -18 | -7.00  | 5.55  | 1 |
| 2  | 11 | -18 | 63.27  | 13.37 | 1 |
| 1  | 11 | -18 | 1.77   | 5.29  | 1 |
| 0  | 11 | -18 | 29.58  | 8.69  | 1 |
| -1 | 11 | -18 | 9.01   | 5.71  | 1 |
| 9  | 10 | -18 | 3.29   | 6.88  | 1 |
| 8  | 10 | -18 | 2.67   | 6.84  | 1 |
| 7  | 10 | -18 | 3.81   | 7.38  | 1 |
| 6  | 10 | -18 | 34.45  | 11.52 | 1 |
| 5  | 10 | -18 | 3.29   | 7.16  | 1 |

|    |    |     |        |       |   |
|----|----|-----|--------|-------|---|
| 4  | 10 | -18 | 3.73   | 7.32  | 1 |
| 3  | 10 | -18 | 0.84   | 6.34  | 1 |
| 2  | 10 | -18 | 72.71  | 14.02 | 1 |
| 1  | 10 | -18 | 131.53 | 17.64 | 1 |
| 0  | 10 | -18 | 6.26   | 7.38  | 1 |
| -1 | 10 | -18 | 11.17  | 6.81  | 1 |
| 10 | 9  | -18 | -0.36  | 6.68  | 1 |
| 9  | 9  | -18 | -2.81  | 7.15  | 1 |
| 8  | 9  | -18 | 6.04   | 7.96  | 1 |
| 7  | 9  | -18 | 21.11  | 10.17 | 1 |
| 6  | 9  | -18 | 45.33  | 11.90 | 1 |
| 5  | 9  | -18 | 4.79   | 6.93  | 1 |
| 4  | 9  | -18 | 3.87   | 5.75  | 1 |
| 3  | 9  | -18 | 2.24   | 5.86  | 1 |
| 2  | 9  | -18 | 12.31  | 7.54  | 1 |
| 1  | 9  | -18 | 10.01  | 7.34  | 1 |
| 0  | 9  | -18 | 30.37  | 8.89  | 1 |
| -1 | 9  | -18 | 16.75  | 6.90  | 1 |
| 11 | 8  | -18 | -5.79  | 7.96  | 1 |
| 10 | 8  | -18 | -0.44  | 6.37  | 1 |
| 9  | 8  | -18 | -10.54 | 6.35  | 1 |
| 8  | 8  | -18 | -1.07  | 8.45  | 1 |
| 7  | 8  | -18 | 4.59   | 8.34  | 1 |
| 6  | 8  | -18 | 14.53  | 9.02  | 1 |
| 5  | 8  | -18 | 10.32  | 7.10  | 1 |
| 4  | 8  | -18 | 99.86  | 17.12 | 1 |
| 3  | 8  | -18 | 75.07  | 14.01 | 1 |
| 2  | 8  | -18 | 83.93  | 15.03 | 1 |
| 1  | 8  | -18 | 14.02  | 6.98  | 1 |
| 0  | 8  | -18 | 10.37  | 6.77  | 1 |
| -1 | 8  | -18 | 22.42  | 7.76  | 1 |
| 11 | 7  | -18 | 210.12 | 24.91 | 1 |
| 10 | 7  | -18 | 4.45   | 8.10  | 1 |
| 9  | 7  | -18 | 29.99  | 11.77 | 1 |
| 8  | 7  | -18 | 7.89   | 8.13  | 1 |
| 7  | 7  | -18 | 34.28  | 12.42 | 1 |
| 6  | 7  | -18 | 11.75  | 7.32  | 1 |
| 5  | 7  | -18 | 16.96  | 7.94  | 1 |
| 4  | 7  | -18 | 29.18  | 9.18  | 1 |
| 3  | 7  | -18 | 103.67 | 16.26 | 1 |
| 2  | 7  | -18 | 63.71  | 12.96 | 1 |
| 1  | 7  | -18 | 9.92   | 6.37  | 1 |
| 0  | 7  | -18 | 7.90   | 6.64  | 1 |
| -1 | 7  | -18 | 161.73 | 18.58 | 1 |
| 12 | 6  | -18 | 32.92  | 11.80 | 1 |
| 11 | 6  | -18 | 14.75  | 9.15  | 1 |

|     |    |     |        |       |   |
|-----|----|-----|--------|-------|---|
| 10  | 6  | -18 | 15.72  | 9.33  | 1 |
| 9   | 6  | -18 | 51.58  | 14.15 | 1 |
| 8   | 6  | -18 | 8.41   | 8.85  | 1 |
| 7   | 6  | -18 | 1.90   | 9.04  | 1 |
| 6   | 6  | -18 | 9.85   | 7.55  | 1 |
| 5   | 6  | -18 | -0.33  | 5.36  | 1 |
| 4   | 6  | -18 | 296.96 | 23.66 | 1 |
| 3   | 6  | -18 | 25.14  | 8.38  | 1 |
| 2   | 6  | -18 | 14.69  | 6.73  | 1 |
| 1   | 6  | -18 | -9.57  | 5.23  | 1 |
| 0   | 6  | -18 | 7.70   | 7.34  | 1 |
| -1  | 6  | -18 | 23.39  | 8.43  | 1 |
| 12  | 5  | -18 | 33.66  | 12.29 | 1 |
| -12 | -5 | 18  | 51.80  | 15.90 | 3 |
| -11 | -5 | 18  | 12.48  | 11.49 | 3 |
| 11  | 5  | -18 | 2.16   | 7.93  | 1 |
| -10 | -5 | 18  | -5.29  | 8.14  | 3 |
| 10  | 5  | -18 | 1.38   | 8.23  | 1 |
| 9   | 5  | -18 | 56.31  | 15.76 | 1 |
| 8   | 5  | -18 | 8.62   | 9.12  | 1 |
| 7   | 5  | -18 | 10.18  | 9.03  | 1 |
| 6   | 5  | -18 | 102.35 | 16.85 | 1 |
| 5   | 5  | -18 | -11.34 | 4.84  | 1 |
| 4   | 5  | -18 | 11.58  | 7.85  | 1 |
| 3   | 5  | -18 | -2.19  | 4.80  | 1 |
| 2   | 5  | -18 | 17.07  | 7.67  | 1 |
| 1   | 5  | -18 | 73.91  | 13.44 | 1 |
| 0   | 5  | -18 | 78.60  | 14.28 | 1 |
| -1  | 5  | -18 | -3.40  | 5.26  | 1 |
| 12  | 4  | -18 | 169.73 | 22.75 | 1 |
| -12 | -4 | 18  | 134.05 | 22.58 | 3 |
| -11 | -4 | 18  | 24.45  | 12.46 | 3 |
| 11  | 4  | -18 | 55.47  | 14.38 | 1 |
| 10  | 4  | -18 | 52.80  | 14.30 | 1 |
| -10 | -4 | 18  | 1.57   | 9.53  | 3 |
| 9   | 4  | -18 | 0.88   | 8.77  | 1 |
| 8   | 4  | -18 | -3.72  | 7.47  | 1 |
| 7   | 4  | -18 | 28.17  | 10.45 | 1 |
| 6   | 4  | -18 | 95.32  | 16.11 | 1 |
| 5   | 4  | -18 | 12.11  | 6.87  | 1 |
| 4   | 4  | -18 | 11.88  | 8.17  | 1 |
| 3   | 4  | -18 | 28.92  | 9.16  | 1 |
| 2   | 4  | -18 | 34.66  | 9.93  | 1 |
| 1   | 4  | -18 | -5.53  | 4.86  | 1 |
| 0   | 4  | -18 | 27.25  | 9.81  | 1 |
| -1  | 4  | -18 | 105.36 | 15.66 | 1 |

|     |    |     |        |       |   |
|-----|----|-----|--------|-------|---|
| -13 | -3 | 18  | 1.44   | 9.85  | 3 |
| 13  | 3  | -18 | -2.30  | 8.04  | 1 |
| 12  | 3  | -18 | 56.83  | 15.42 | 1 |
| -12 | -3 | 18  | 7.48   | 10.86 | 3 |
| 11  | 3  | -18 | 3.35   | 7.78  | 1 |
| -11 | -3 | 18  | 17.02  | 10.16 | 3 |
| 10  | 3  | -18 | 57.95  | 15.34 | 1 |
| -10 | -3 | 18  | 41.63  | 12.76 | 3 |
| 9   | 3  | -18 | 85.95  | 16.96 | 1 |
| 8   | 3  | -18 | 183.54 | 22.33 | 1 |
| 7   | 3  | -18 | 24.75  | 10.64 | 1 |
| 6   | 3  | -18 | 32.14  | 9.34  | 1 |
| 5   | 3  | -18 | 247.22 | 21.87 | 1 |
| 4   | 3  | -18 | 14.96  | 6.99  | 1 |
| 3   | 3  | -18 | 260.85 | 21.43 | 1 |
| 2   | 3  | -18 | 70.07  | 13.10 | 1 |
| 1   | 3  | -18 | 14.71  | 6.56  | 1 |
| 0   | 3  | -18 | 42.04  | 10.14 | 1 |
| -1  | 3  | -18 | 27.06  | 8.44  | 1 |
| -13 | -2 | 18  | 12.44  | 11.36 | 3 |
| 13  | 2  | -18 | -0.38  | 8.06  | 1 |
| -12 | -2 | 18  | 124.31 | 23.02 | 3 |
| 12  | 2  | -18 | 157.13 | 22.26 | 1 |
| -11 | -2 | 18  | -0.23  | 8.23  | 3 |
| 11  | 2  | -18 | 13.66  | 8.85  | 1 |
| 10  | 2  | -18 | 6.82   | 8.63  | 1 |
| 9   | 2  | -18 | 223.87 | 24.73 | 1 |
| 8   | 2  | -18 | 62.68  | 15.39 | 1 |
| 7   | 2  | -18 | 121.58 | 19.00 | 1 |
| 6   | 2  | -18 | 3.07   | 5.62  | 1 |
| 5   | 2  | -18 | 160.78 | 20.11 | 1 |
| 4   | 2  | -18 | -1.81  | 5.65  | 1 |
| 3   | 2  | -18 | 6.57   | 6.37  | 1 |
| 2   | 2  | -18 | 144.72 | 18.37 | 1 |
| 1   | 2  | -18 | 178.81 | 19.97 | 1 |
| 0   | 2  | -18 | 4.92   | 6.57  | 1 |
| -13 | -1 | 18  | 18.54  | 12.26 | 3 |
| 13  | 1  | -18 | 32.63  | 12.90 | 1 |
| 12  | 1  | -18 | 12.22  | 9.35  | 1 |
| -12 | -1 | 18  | 16.06  | 10.73 | 3 |
| 11  | 1  | -18 | 142.76 | 20.76 | 1 |
| -11 | -1 | 18  | 150.55 | 23.94 | 3 |
| 10  | 1  | -18 | 127.98 | 20.55 | 1 |
| 9   | 1  | -18 | -2.75  | 6.55  | 1 |
| 8   | 1  | -18 | -3.44  | 8.11  | 1 |
| 7   | 1  | -18 | 64.39  | 15.30 | 1 |

|     |    |     |        |       |   |
|-----|----|-----|--------|-------|---|
| 6   | 1  | -18 | 53.90  | 13.19 | 1 |
| 5   | 1  | -18 | 207.60 | 22.63 | 1 |
| 4   | 1  | -18 | 33.71  | 9.38  | 1 |
| 3   | 1  | -18 | 40.72  | 10.50 | 1 |
| 2   | 1  | -18 | 61.29  | 12.81 | 1 |
| 1   | 1  | -18 | -4.05  | 5.21  | 1 |
| 0   | 1  | -18 | 29.59  | 9.86  | 1 |
| -13 | 0  | 18  | -8.40  | 9.68  | 3 |
| 13  | 0  | -18 | 7.66   | 8.82  | 1 |
| -12 | 0  | 18  | 2.51   | 10.48 | 3 |
| 12  | 0  | -18 | 12.54  | 9.49  | 1 |
| 11  | 0  | -18 | 191.77 | 23.57 | 1 |
| -11 | 0  | 18  | 199.70 | 26.58 | 3 |
| 10  | 0  | -18 | 51.15  | 14.65 | 1 |
| 9   | 0  | -18 | 52.48  | 14.04 | 1 |
| 8   | 0  | -18 | 3.98   | 8.32  | 1 |
| 7   | 0  | -18 | 52.84  | 14.59 | 1 |
| 6   | 0  | -18 | 4.26   | 6.85  | 1 |
| 5   | 0  | -18 | 24.38  | 9.13  | 1 |
| 4   | 0  | -18 | 349.56 | 25.83 | 1 |
| 3   | 0  | -18 | 15.07  | 7.72  | 1 |
| 2   | 0  | -18 | 91.22  | 15.55 | 1 |
| 1   | 0  | -18 | 4.37   | 6.49  | 1 |
| 0   | 0  | -18 | 16.08  | 8.42  | 1 |
| -13 | 1  | 18  | 121.04 | 23.14 | 3 |
| 13  | -1 | -18 | 121.84 | 19.31 | 1 |
| 12  | -1 | -18 | 76.65  | 16.86 | 1 |
| -12 | 1  | 18  | 22.48  | 12.41 | 3 |
| 11  | -1 | -18 | -8.30  | 7.53  | 1 |
| 10  | -1 | -18 | 9.33   | 8.79  | 1 |
| 9   | -1 | -18 | -7.15  | 7.94  | 1 |
| 8   | -1 | -18 | 62.48  | 14.63 | 1 |
| 7   | -1 | -18 | 26.52  | 11.55 | 1 |
| 6   | -1 | -18 | 12.78  | 7.80  | 1 |
| 5   | -1 | -18 | 2.54   | 6.53  | 1 |
| 4   | -1 | -18 | 32.67  | 10.58 | 1 |
| 3   | -1 | -18 | 54.42  | 13.57 | 1 |
| 2   | -1 | -18 | -5.06  | 5.64  | 1 |
| 1   | -1 | -18 | 37.32  | 10.41 | 1 |
| 0   | -1 | -18 | 28.94  | 10.05 | 1 |
| 13  | -2 | -18 | 40.25  | 12.82 | 1 |
| 12  | -2 | -18 | 0.02   | 8.87  | 1 |
| -12 | 2  | 18  | 5.13   | 9.41  | 3 |
| 11  | -2 | -18 | 14.70  | 9.58  | 1 |
| 10  | -2 | -18 | 6.40   | 8.74  | 1 |
| 9   | -2 | -18 | 27.47  | 10.42 | 1 |



|    |    |     |        |       |   |
|----|----|-----|--------|-------|---|
| 8  | -2 | -18 | 43.77  | 13.57 | 1 |
| 7  | -2 | -18 | 26.37  | 11.40 | 1 |
| 6  | -2 | -18 | 141.15 | 19.90 | 1 |
| 5  | -2 | -18 | 6.15   | 7.19  | 1 |
| 4  | -2 | -18 | 1.36   | 6.93  | 1 |
| 3  | -2 | -18 | -1.72  | 6.47  | 1 |
| 2  | -2 | -18 | 8.09   | 6.98  | 1 |
| 1  | -2 | -18 | 111.62 | 16.98 | 1 |
| 0  | -2 | -18 | -5.03  | 7.07  | 1 |
| 12 | -3 | -18 | 6.08   | 10.09 | 1 |
| 11 | -3 | -18 | -8.39  | 7.61  | 1 |
| 10 | -3 | -18 | 3.13   | 8.06  | 1 |
| 9  | -3 | -18 | 12.70  | 9.50  | 1 |
| 8  | -3 | -18 | 4.67   | 8.91  | 1 |
| 7  | -3 | -18 | 4.10   | 8.65  | 1 |
| 6  | -3 | -18 | 12.89  | 8.15  | 1 |
| 5  | -3 | -18 | 19.53  | 8.79  | 1 |
| 4  | -3 | -18 | 24.35  | 9.18  | 1 |
| 3  | -3 | -18 | 135.46 | 19.09 | 1 |
| 2  | -3 | -18 | 27.85  | 10.28 | 1 |
| 1  | -3 | -18 | 3.01   | 7.70  | 1 |
| 0  | -3 | -18 | 3.23   | 7.19  | 1 |
| 12 | -4 | -18 | 6.66   | 9.99  | 1 |
| 11 | -4 | -18 | -1.22  | 6.96  | 1 |
| 10 | -4 | -18 | -0.61  | 7.66  | 1 |
| 9  | -4 | -18 | 6.34   | 8.50  | 1 |
| 8  | -4 | -18 | 7.11   | 8.59  | 1 |
| 7  | -4 | -18 | -2.12  | 7.61  | 1 |
| 6  | -4 | -18 | 4.30   | 7.55  | 1 |
| 5  | -4 | -18 | -5.12  | 6.53  | 1 |
| 4  | -4 | -18 | 8.40   | 7.40  | 1 |
| 3  | -4 | -18 | 49.24  | 14.18 | 1 |
| 2  | -4 | -18 | 5.22   | 7.38  | 1 |
| 1  | -4 | -18 | -1.18  | 7.58  | 1 |
| 11 | -5 | -18 | -4.83  | 6.97  | 1 |
| 10 | -5 | -18 | -6.91  | 7.15  | 1 |
| 9  | -5 | -18 | 3.67   | 6.80  | 1 |
| 8  | -5 | -18 | 5.20   | 7.10  | 1 |
| 7  | -5 | -18 | 8.48   | 8.50  | 1 |
| 6  | -5 | -18 | 5.88   | 9.05  | 1 |
| 5  | -5 | -18 | 16.04  | 9.38  | 1 |
| 4  | -5 | -18 | 70.26  | 15.95 | 1 |
| 3  | -5 | -18 | 31.18  | 11.87 | 1 |
| 2  | -5 | -18 | 3.62   | 9.37  | 1 |
| 10 | -6 | -18 | 6.13   | 7.87  | 1 |
| 9  | -6 | -18 | -5.77  | 6.39  | 1 |

|    |    |     |        |       |   |
|----|----|-----|--------|-------|---|
| 8  | -6 | -18 | 4.68   | 7.44  | 1 |
| 7  | -6 | -18 | 15.40  | 10.36 | 1 |
| 6  | -6 | -18 | 1.00   | 8.65  | 1 |
| 5  | -6 | -18 | 14.67  | 10.38 | 1 |
| 4  | -6 | -18 | 0.53   | 8.89  | 1 |
| 4  | 12 | -19 | 92.21  | 17.92 | 1 |
| 3  | 12 | -19 | 56.28  | 13.45 | 1 |
| 2  | 12 | -19 | -0.91  | 8.06  | 1 |
| 1  | 12 | -19 | 46.17  | 13.33 | 1 |
| 0  | 12 | -19 | 28.92  | 10.46 | 1 |
| 6  | 11 | -19 | 1.32   | 8.85  | 1 |
| 5  | 11 | -19 | 45.80  | 13.15 | 1 |
| 4  | 11 | -19 | 74.07  | 16.75 | 1 |
| 3  | 11 | -19 | 11.36  | 8.11  | 1 |
| 2  | 11 | -19 | 55.40  | 13.96 | 1 |
| 1  | 11 | -19 | 12.07  | 7.93  | 1 |
| 0  | 11 | -19 | 40.10  | 11.15 | 1 |
| 7  | 10 | -19 | 0.90   | 6.36  | 1 |
| 6  | 10 | -19 | 197.90 | 24.76 | 1 |
| 5  | 10 | -19 | 42.24  | 12.13 | 1 |
| 4  | 10 | -19 | 8.90   | 8.09  | 1 |
| 3  | 10 | -19 | 25.42  | 9.88  | 1 |
| 2  | 10 | -19 | 10.20  | 7.03  | 1 |
| 1  | 10 | -19 | 103.67 | 16.60 | 1 |
| 0  | 10 | -19 | 31.30  | 10.08 | 1 |
| 9  | 9  | -19 | 13.45  | 7.88  | 1 |
| 8  | 9  | -19 | 1.90   | 6.55  | 1 |
| 7  | 9  | -19 | -5.01  | 5.92  | 1 |
| 6  | 9  | -19 | 54.60  | 13.36 | 1 |
| 5  | 9  | -19 | 55.18  | 12.72 | 1 |
| 4  | 9  | -19 | 8.41   | 7.55  | 1 |
| 3  | 9  | -19 | 10.20  | 7.49  | 1 |
| 2  | 9  | -19 | 10.85  | 7.23  | 1 |
| 1  | 9  | -19 | 21.40  | 8.32  | 1 |
| 0  | 9  | -19 | 32.57  | 9.82  | 1 |
| 9  | 8  | -19 | -4.95  | 6.34  | 1 |
| 8  | 8  | -19 | 1.98   | 6.79  | 1 |
| 7  | 8  | -19 | 0.00   | 6.95  | 1 |
| 6  | 8  | -19 | 61.09  | 15.11 | 1 |
| 5  | 8  | -19 | -5.97  | 6.60  | 1 |
| 4  | 8  | -19 | -7.04  | 6.34  | 1 |
| 3  | 8  | -19 | 41.80  | 11.88 | 1 |
| 2  | 8  | -19 | 16.09  | 8.15  | 1 |
| 1  | 8  | -19 | 13.74  | 7.29  | 1 |
| 0  | 8  | -19 | 33.14  | 10.24 | 1 |
| 10 | 7  | -19 | 5.16   | 7.54  | 1 |

|     |       |        |       |   |
|-----|-------|--------|-------|---|
| 9   | 7-19  | 3.43   | 7.07  | 1 |
| 8   | 7-19  | 2.21   | 6.98  | 1 |
| 7   | 7-19  | 5.66   | 8.57  | 1 |
| 6   | 7-19  | -13.43 | 6.69  | 1 |
| 5   | 7-19  | -6.85  | 6.23  | 1 |
| 4   | 7-19  | 35.38  | 10.49 | 1 |
| 3   | 7-19  | 44.87  | 11.44 | 1 |
| 2   | 7-19  | 240.76 | 23.92 | 1 |
| 1   | 7-19  | 51.68  | 10.98 | 1 |
| 0   | 7-19  | 27.77  | 8.18  | 1 |
| 11  | 6-19  | 12.06  | 7.40  | 1 |
| 10  | 6-19  | 2.17   | 7.44  | 1 |
| 9   | 6-19  | -1.07  | 7.36  | 1 |
| 8   | 6-19  | -1.61  | 7.25  | 1 |
| 7   | 6-19  | -4.00  | 7.18  | 1 |
| 6   | 6-19  | 21.38  | 9.86  | 1 |
| 5   | 6-19  | 8.05   | 7.23  | 1 |
| 4   | 6-19  | -0.39  | 7.31  | 1 |
| 3   | 6-19  | -0.10  | 6.27  | 1 |
| 2   | 6-19  | 25.66  | 8.91  | 1 |
| 1   | 6-19  | 36.49  | 10.19 | 1 |
| 0   | 6-19  | 14.79  | 7.94  | 1 |
| 11  | 5-19  | -10.43 | 5.99  | 1 |
| 10  | 5-19  | 0.08   | 6.52  | 1 |
| 9   | 5-19  | -3.08  | 7.49  | 1 |
| 8   | 5-19  | -1.15  | 7.52  | 1 |
| 7   | 5-19  | 11.61  | 8.83  | 1 |
| 6   | 5-19  | 111.74 | 18.82 | 1 |
| 5   | 5-19  | -4.71  | 5.85  | 1 |
| 4   | 5-19  | 9.49   | 8.18  | 1 |
| 3   | 5-19  | 94.22  | 16.72 | 1 |
| 2   | 5-19  | 9.60   | 7.11  | 1 |
| 1   | 5-19  | 26.95  | 8.74  | 1 |
| 0   | 5-19  | -6.85  | 5.38  | 1 |
| -11 | -4-19 | 22.56  | 12.28 | 3 |
| 11  | 4-19  | -2.46  | 7.23  | 1 |
| 10  | 4-19  | -4.93  | 6.18  | 1 |
| 9   | 4-19  | -7.13  | 7.07  | 1 |
| 8   | 4-19  | 11.33  | 8.49  | 1 |
| 7   | 4-19  | 10.89  | 9.06  | 1 |
| 6   | 4-19  | 28.51  | 11.17 | 1 |
| 5   | 4-19  | 54.02  | 12.50 | 1 |
| 4   | 4-19  | 6.96   | 7.20  | 1 |
| 3   | 4-19  | 16.61  | 8.23  | 1 |
| 2   | 4-19  | 55.19  | 12.59 | 1 |
| 1   | 4-19  | 78.87  | 13.92 | 1 |

|     |    |     |        |       |   |
|-----|----|-----|--------|-------|---|
| 0   | 4  | -19 | 22.52  | 8.83  | 1 |
| 11  | 3  | -19 | -3.30  | 6.46  | 1 |
| -11 | -3 | 19  | 18.12  | 11.17 | 3 |
| 10  | 3  | -19 | 9.42   | 8.39  | 1 |
| 9   | 3  | -19 | -8.09  | 6.88  | 1 |
| 7   | 3  | -19 | 23.68  | 10.99 | 1 |
| 6   | 3  | -19 | -7.32  | 6.67  | 1 |
| 5   | 3  | -19 | 283.19 | 24.06 | 1 |
| 4   | 3  | -19 | 23.07  | 8.99  | 1 |
| 3   | 3  | -19 | 19.26  | 7.78  | 1 |
| 2   | 3  | -19 | 80.54  | 15.37 | 1 |
| 1   | 3  | -19 | 10.43  | 7.38  | 1 |
| 0   | 3  | -19 | 5.81   | 7.54  | 1 |
| 12  | 2  | -19 | 71.65  | 17.39 | 1 |
| -12 | -2 | 19  | 36.24  | 14.27 | 3 |
| 11  | 2  | -19 | 11.34  | 7.29  | 1 |
| 10  | 2  | -19 | -5.88  | 7.07  | 1 |
| 9   | 2  | -19 | 4.93   | 7.95  | 1 |
| 8   | 2  | -19 | 8.98   | 8.56  | 1 |
| 7   | 2  | -19 | 230.70 | 24.88 | 1 |
| 6   | 2  | -19 | 30.61  | 10.53 | 1 |
| 5   | 2  | -19 | 71.82  | 14.22 | 1 |
| 4   | 2  | -19 | 18.25  | 9.22  | 1 |
| 3   | 2  | -19 | 39.78  | 11.03 | 1 |
| 2   | 2  | -19 | 129.72 | 18.47 | 1 |
| 1   | 2  | -19 | 113.07 | 17.07 | 1 |
| 0   | 2  | -19 | 1.26   | 6.83  | 1 |
| -12 | -1 | 19  | 15.56  | 11.52 | 3 |
| 12  | 1  | -19 | -6.56  | 8.08  | 1 |
| 11  | 1  | -19 | 9.22   | 6.98  | 1 |
| 10  | 1  | -19 | 5.57   | 7.95  | 1 |
| 9   | 1  | -19 | -2.21  | 7.76  | 1 |
| 8   | 1  | -19 | 31.49  | 11.21 | 1 |
| 7   | 1  | -19 | 110.68 | 19.15 | 1 |
| 6   | 1  | -19 | 85.25  | 16.56 | 1 |
| 5   | 1  | -19 | 2.70   | 7.15  | 1 |
| 4   | 1  | -19 | 16.53  | 8.81  | 1 |
| 3   | 1  | -19 | 16.55  | 8.21  | 1 |
| 2   | 1  | -19 | -4.40  | 6.18  | 1 |
| 1   | 1  | -19 | 24.14  | 9.73  | 1 |
| 0   | 1  | -19 | 110.10 | 17.39 | 1 |
| 12  | 0  | -19 | 3.23   | 8.17  | 1 |
| 11  | 0  | -19 | -1.41  | 6.96  | 1 |
| 10  | 0  | -19 | 11.38  | 7.15  | 1 |
| 9   | 0  | -19 | -8.51  | 6.74  | 1 |
| 8   | 0  | -19 | -2.26  | 7.76  | 1 |

|    |    |     |        |       |   |
|----|----|-----|--------|-------|---|
| 7  | 0  | -19 | 10.71  | 8.40  | 1 |
| 6  | 0  | -19 | 45.77  | 12.36 | 1 |
| 5  | 0  | -19 | 15.69  | 8.98  | 1 |
| 4  | 0  | -19 | 143.89 | 19.96 | 1 |
| 3  | 0  | -19 | 0.93   | 6.95  | 1 |
| 2  | 0  | -19 | 32.27  | 10.77 | 1 |
| 1  | 0  | -19 | 70.85  | 14.93 | 1 |
| 0  | 0  | -19 | 26.53  | 10.76 | 1 |
| 11 | -1 | -19 | -0.76  | 6.61  | 1 |
| 10 | -1 | -19 | 2.32   | 7.37  | 1 |
| 9  | -1 | -19 | 1.53   | 8.10  | 1 |
| 8  | -1 | -19 | 4.52   | 8.55  | 1 |
| 7  | -1 | -19 | 12.33  | 9.51  | 1 |
| 6  | -1 | -19 | 123.91 | 19.84 | 1 |
| 5  | -1 | -19 | 2.31   | 8.07  | 1 |
| 4  | -1 | -19 | 32.73  | 11.31 | 1 |
| 3  | -1 | -19 | 25.44  | 10.13 | 1 |
| 2  | -1 | -19 | 3.73   | 7.48  | 1 |
| 1  | -1 | -19 | 29.05  | 10.53 | 1 |
| 0  | -1 | -19 | 49.47  | 13.21 | 1 |
| 11 | -2 | -19 | -2.98  | 7.42  | 1 |
| 10 | -2 | -19 | 1.89   | 8.09  | 1 |
| 9  | -2 | -19 | -11.38 | 6.77  | 1 |
| 8  | -2 | -19 | 2.80   | 6.56  | 1 |
| 7  | -2 | -19 | 86.72  | 16.42 | 1 |
| 6  | -2 | -19 | 215.10 | 25.53 | 1 |
| 5  | -2 | -19 | 4.28   | 8.92  | 1 |
| 4  | -2 | -19 | 29.35  | 10.43 | 1 |
| 3  | -2 | -19 | 73.60  | 15.82 | 1 |
| 2  | -2 | -19 | 30.38  | 11.35 | 1 |
| 1  | -2 | -19 | 9.03   | 8.87  | 1 |
| 10 | -3 | -19 | 1.35   | 7.28  | 1 |
| 9  | -3 | -19 | 0.68   | 7.80  | 1 |
| 8  | -3 | -19 | 3.41   | 7.98  | 1 |
| 7  | -3 | -19 | 2.01   | 8.07  | 1 |
| 6  | -3 | -19 | 18.55  | 10.81 | 1 |
| 5  | -3 | -19 | 52.41  | 15.31 | 1 |
| 4  | -3 | -19 | 14.03  | 9.69  | 1 |
| 3  | -3 | -19 | 154.40 | 21.41 | 1 |
| 2  | -3 | -19 | 56.81  | 14.13 | 1 |
| 9  | -4 | -19 | -8.91  | 7.05  | 1 |
| 8  | -4 | -19 | -11.63 | 6.73  | 1 |
| 7  | -4 | -19 | 23.18  | 11.38 | 1 |
| 6  | -4 | -19 | 25.77  | 12.00 | 1 |
| 5  | -4 | -19 | 77.68  | 16.26 | 1 |
| 4  | -4 | -19 | -4.90  | 7.91  | 1 |

|   |    |     |        |       |   |
|---|----|-----|--------|-------|---|
| 5 | 10 | -20 | 15.09  | 10.78 | 1 |
| 4 | 10 | -20 | 13.48  | 10.24 | 1 |
| 3 | 10 | -20 | 52.82  | 13.96 | 1 |
| 2 | 10 | -20 | 20.56  | 9.71  | 1 |
| 1 | 10 | -20 | 80.30  | 15.60 | 1 |
| 6 | 9  | -20 | 3.80   | 8.74  | 1 |
| 5 | 9  | -20 | 146.50 | 22.20 | 1 |
| 4 | 9  | -20 | 166.53 | 22.35 | 1 |
| 3 | 9  | -20 | 38.95  | 12.73 | 1 |
| 2 | 9  | -20 | 36.27  | 12.62 | 1 |
| 1 | 9  | -20 | 5.62   | 7.46  | 1 |
| 0 | 9  | -20 | 94.31  | 16.69 | 1 |
| 7 | 8  | -20 | -5.94  | 7.36  | 1 |
| 6 | 8  | -20 | -5.98  | 8.18  | 1 |
| 5 | 8  | -20 | 48.53  | 13.77 | 1 |
| 4 | 8  | -20 | 31.51  | 11.84 | 1 |
| 3 | 8  | -20 | 22.43  | 9.87  | 1 |
| 2 | 8  | -20 | -0.72  | 6.53  | 1 |
| 1 | 8  | -20 | 23.03  | 9.34  | 1 |
| 0 | 8  | -20 | -6.48  | 6.25  | 1 |
| 8 | 7  | -20 | 2.72   | 7.02  | 1 |
| 7 | 7  | -20 | 105.68 | 18.94 | 1 |
| 6 | 7  | -20 | 45.00  | 13.07 | 1 |
| 5 | 7  | -20 | 0.38   | 7.39  | 1 |
| 4 | 7  | -20 | 8.82   | 8.06  | 1 |
| 3 | 7  | -20 | 2.76   | 7.22  | 1 |
| 2 | 7  | -20 | 95.10  | 16.34 | 1 |
| 1 | 7  | -20 | 58.83  | 13.53 | 1 |
| 0 | 7  | -20 | -8.51  | 6.20  | 1 |
| 9 | 6  | -20 | 4.76   | 7.11  | 1 |
| 8 | 6  | -20 | -2.21  | 5.67  | 1 |
| 7 | 6  | -20 | 17.48  | 10.99 | 1 |
| 6 | 6  | -20 | 26.53  | 11.15 | 1 |
| 5 | 6  | -20 | 15.94  | 9.36  | 1 |
| 4 | 6  | -20 | 127.07 | 19.06 | 1 |
| 3 | 6  | -20 | 15.52  | 9.16  | 1 |
| 2 | 6  | -20 | 11.14  | 8.70  | 1 |
| 1 | 6  | -20 | 55.42  | 14.10 | 1 |
| 0 | 6  | -20 | 18.17  | 9.69  | 1 |
| 9 | 5  | -20 | -3.96  | 6.74  | 1 |
| 8 | 5  | -20 | -3.55  | 6.60  | 1 |
| 7 | 5  | -20 | 31.13  | 11.87 | 1 |
| 6 | 5  | -20 | 9.42   | 9.15  | 1 |
| 5 | 5  | -20 | 12.01  | 8.76  | 1 |
| 4 | 5  | -20 | 42.98  | 10.96 | 1 |
| 3 | 5  | -20 | 7.66   | 8.35  | 1 |

|    |   |     |        |       |   |
|----|---|-----|--------|-------|---|
| 2  | 5 | -20 | 12.14  | 8.31  | 1 |
| 1  | 5 | -20 | 4.70   | 8.95  | 1 |
| 0  | 5 | -20 | 36.63  | 11.17 | 1 |
| 10 | 4 | -20 | 0.54   | 6.42  | 1 |
| 9  | 4 | -20 | -1.84  | 6.85  | 1 |
| 8  | 4 | -20 | -3.49  | 7.91  | 1 |
| 7  | 4 | -20 | 1.70   | 8.15  | 1 |
| 6  | 4 | -20 | 18.05  | 8.94  | 1 |
| 5  | 4 | -20 | 64.41  | 14.27 | 1 |
| 4  | 4 | -20 | 5.59   | 7.32  | 1 |
| 3  | 4 | -20 | -5.33  | 7.01  | 1 |
| 2  | 4 | -20 | -1.28  | 6.74  | 1 |
| 1  | 4 | -20 | 5.25   | 8.00  | 1 |
| 0  | 4 | -20 | 25.42  | 9.37  | 1 |
| 10 | 3 | -20 | 1.77   | 7.71  | 1 |
| 9  | 3 | -20 | -3.53  | 5.78  | 1 |
| 8  | 3 | -20 | 5.49   | 7.35  | 1 |
| 7  | 3 | -20 | 15.46  | 9.47  | 1 |
| 6  | 3 | -20 | -7.64  | 6.65  | 1 |
| 5  | 3 | -20 | 2.40   | 7.66  | 1 |
| 4  | 3 | -20 | -2.89  | 7.60  | 1 |
| 3  | 3 | -20 | -4.91  | 6.20  | 1 |
| 2  | 3 | -20 | -3.42  | 6.43  | 1 |
| 1  | 3 | -20 | 6.69   | 8.38  | 1 |
| 0  | 3 | -20 | 13.62  | 9.36  | 1 |
| 10 | 2 | -20 | -6.28  | 6.71  | 1 |
| 9  | 2 | -20 | -1.87  | 6.70  | 1 |
| 8  | 2 | -20 | 15.55  | 9.47  | 1 |
| 7  | 2 | -20 | 160.09 | 22.57 | 1 |
| 6  | 2 | -20 | 157.49 | 21.86 | 1 |
| 5  | 2 | -20 | 6.40   | 7.11  | 1 |
| 4  | 2 | -20 | 2.52   | 6.91  | 1 |
| 3  | 2 | -20 | 12.76  | 8.09  | 1 |
| 2  | 2 | -20 | 42.25  | 11.25 | 1 |
| 1  | 2 | -20 | 16.81  | 9.24  | 1 |
| 10 | 1 | -20 | 3.17   | 6.87  | 1 |
| 9  | 1 | -20 | 7.95   | 6.57  | 1 |
| 8  | 1 | -20 | 0.78   | 6.98  | 1 |
| 7  | 1 | -20 | 45.94  | 13.24 | 1 |
| 6  | 1 | -20 | 11.65  | 9.92  | 1 |
| 5  | 1 | -20 | -6.16  | 7.90  | 1 |
| 4  | 1 | -20 | 16.95  | 9.74  | 1 |
| 3  | 1 | -20 | 9.72   | 7.85  | 1 |
| 2  | 1 | -20 | 3.74   | 8.02  | 1 |
| 1  | 1 | -20 | 27.40  | 10.21 | 1 |
| 9  | 0 | -20 | -15.40 | 5.66  | 1 |

|   |    |     |        |       |   |
|---|----|-----|--------|-------|---|
| 8 | 0  | -20 | 5.27   | 7.27  | 1 |
| 7 | 0  | -20 | 5.85   | 8.84  | 1 |
| 6 | 0  | -20 | 29.93  | 12.16 | 1 |
| 5 | 0  | -20 | 18.69  | 10.11 | 1 |
| 4 | 0  | -20 | 4.31   | 8.83  | 1 |
| 3 | 0  | -20 | -10.87 | 7.18  | 1 |
| 2 | 0  | -20 | 31.81  | 11.48 | 1 |
| 8 | -1 | -20 | 12.09  | 7.92  | 1 |
| 7 | -1 | -20 | -2.80  | 8.29  | 1 |
| 6 | -1 | -20 | 155.95 | 22.01 | 1 |
| 5 | -1 | -20 | 5.75   | 9.33  | 1 |
| 4 | -1 | -20 | 9.46   | 8.80  | 1 |
| 3 | -1 | -20 | 134.73 | 20.88 | 1 |
| 6 | -2 | -20 | 44.49  | 14.80 | 1 |
| 5 | -2 | -20 | 39.72  | 11.89 | 1 |
| 5 | 6  | -21 | 17.72  | 9.79  | 1 |
| 4 | 6  | -21 | 53.90  | 15.62 | 1 |
| 5 | 5  | -21 | -13.19 | 7.74  | 1 |
| 4 | 5  | -21 | 46.22  | 13.87 | 1 |
| 3 | 5  | -21 | -5.41  | 7.35  | 1 |
| 6 | 4  | -21 | 75.93  | 16.25 | 1 |
| 5 | 4  | -21 | -0.51  | 8.51  | 1 |
| 4 | 4  | -21 | 29.94  | 11.85 | 1 |
| 5 | 3  | -21 | 83.49  | 16.97 | 1 |
| 4 | 3  | -21 | 26.01  | 11.40 | 1 |
| 0 | 0  | 0   | 0.00   | 0.00  | 0 |

;

\_shelx\_hkl\_checksum 73212
